# Supplementary material for: ADAR-deficiency perturbs the global splicing landscape in mouse tissues
Source: Genome Res. 2020 Aug;30(8):1107–18. doi: 10.1101/gr.256933.119 (PMC7462079; doi:10.1101/gr.256933.119)
Supplement: Supplemental Material [file supp_gr.256933.119_Supplemental_Dataset_S1.xlsx]

## Sheet: Legend
Supplemental_Dataset_S1: Differential Editing Analysis in ADAR1 (Adar) and ADAR2 (Adarb1) KO tissues
Column Header	Column Description
Editing Site (ES)	Location of Editing Site
Chromosome	Chromosome harboring the editing site
Position	position of the editing site
Strand	strand of the editing site
Annotation	editing site annotation as exonic, intronic or intergenic
HostGene(s)	Host gene harboring the editing site
Min Coverage Across 6 Samples	Minimum number of total reads spanning the editing site in all 6 samples
No. of WT Samples with Coverage>=5	Number of WT samples with a minimum of 5 reads spanning the editing site
No. of KO Samples with Coverage>=5	Number of KO samples with a minimum of 5 reads spanning the editing site
Mean Editing Levels - WT	Mean editing levels of editing site in WT
Mean Editing Levels - KO	Mean editing levels of editing site in KO
WT-KO	Difference between mean editing levels in WT and KO samples; (>0 : Decreases in Mutant & <0 : Increases in Mutant)
WT1-Edited Reads	Number of edited reads spanning the editing site in WT sample-1
WT1-Total Reads	Number of total reads spanning the editing site in WT sample-1
WT1-Editing Levels	Editing level of the editing site in WT sample-1
WT2-Edited Reads	Number of edited reads spanning the editing site in WT sample-2
WT2-Total Reads	Number of total reads spanning the editing site in WT sample-2
WT2-Editing Levels	Editing level of the editing site in WT sample-2
WT3-Edited Reads	Number of edited reads spanning the editing site in WT sample-3
WT3-Total Reads	Number of total reads spanning the editing site in WT sample-3
WT3-Editing Levels	Editing level of the editing site in WT sample-3
KO1-Edited Reads	Number of edited reads spanning the editing site in KO sample-1
KO1-Total Reads	Number of total reads spanning the editing site in KO sample-1
KO1-Editing Levels	Editing level of the editing site in KO sample-1
KO2-Edited Reads	Number of edited reads spanning the editing site in KO sample-2
KO2-Total Reads	Number of total reads spanning the editing site in KO sample-2
KO2-Editing Levels	Editing level of the editing site in KO sample-2
KO3-Edited Reads	Number of edited reads spanning the editing site in KO sample-3
KO3-Total Reads	Number of total reads spanning the editing site in KO sample-3
KO3-Editing Levels	Editing level of the editing site in KO sample-3
Differential Editing Classification	Editing site classification as differentially edited or steady depending on the p-value
p-Value	t-test p-value derived by Welch's t-test on 3 WT editing levels and 3 KO editing levels

## Sheet: Bone Marrow-Adar KO
Editing Site (ES)	Chromosome	Position	Strand	Annotation	||	HostGene(s)	||	Min Coverage Across 6 Samples	No. of WT Samples with Coverage>=5	No. of KO Samples with Coverage>=5	||	Mean Editing Levels - WT	Mean Editing Levels - KO	WT-KO (>0 : Decreases in Mutant & <0 : Increases in Mutant)	||	WT1-Edited Reads	WT1-Total Reads	WT1-Editing Levels	|	WT2-Edited Reads	WT2-Total Reads	WT2-Editing Levels	|	WT3-Edited Reads	WT3-Total Reads	WT3-Editing Levels	||	KO1-Edited Reads	KO1-Total Reads	KO1-Editing Levels	|	KO2-Edited Reads	KO2-Total Reads	KO2-Editing Levels	|	KO3-Edited Reads	KO3-Total Reads	KO3-Editing Levels	||	Differential Editing Classification	Welch t-test p-Value
chr3:129985334	chr3	129985334	-	Intron	||	Sec24b	||	6	3	3	||	0.113636	0.491667	-0.37803	||	2	8	0.25	|	1	11	0.0909091	|	0	8	0	||	6	10	0.6	|	3	6	0.5	|	3	8	0.375	||	Differentially Edited	0.0185438
chr6:149301165	chr6	149301165	-	intergenic	||	NA	||	2	3	2	||	0.047619	0.344444	-0.296825	||	0	5	0	|	0	17	0	|	1	7	0.142857	||	1	2	0.5	|	3	9	0.333333	|	1	5	0.2	||	Differentially Edited	0.0552774
chr17:12760317	chr17	12760317	+	Intron	||	Airn;Igf2r	||	3	3	2	||	0.0937951	0.380273	-0.286478	||	0	11	0	|	4	21	0.190476	|	2	22	0.0909091	||	5	11	0.454545	|	6	17	0.352941	|	1	3	0.333333	||	Differentially Edited	0.0164925
chr18:35225153	chr18	35225153	+	Intron	||	Ctnna1	||	5	3	3	||	0.0952381	0.369444	-0.274206	||	2	7	0.285714	|	0	5	0	|	0	7	0	||	2	5	0.4	|	2	6	0.333333	|	3	8	0.375	||	Differentially Edited	0.0969305
chr11:30849754	chr11	30849754	+	Intron	||	Psme4	||	2	2	3	||	0	0.230159	-0.230159	||	0	2	0	|	0	16	0	|	0	6	0	||	2	7	0.285714	|	1	14	0.0714286	|	2	6	0.333333	||	Differentially Edited	0.103759
chr9:69999597	chr9	69999597	+	Intron	||	Bnip2	||	8	3	3	||	0	0.215741	-0.215741	||	0	8	0	|	0	12	0	|	0	9	0	||	3	10	0.3	|	2	9	0.222222	|	1	8	0.125	||	Differentially Edited	0.0508909
chr17:12774618	chr17	12774618	+	Intron	||	Airn	||	3	2	2	||	0.0416667	0.226984	-0.185317	||	0	4	0	|	0	11	0	|	1	8	0.125	||	3	14	0.214286	|	2	15	0.133333	|	1	3	0.333333	||	Differentially Edited	0.0667395
chr4:129181216	chr4	129181216	-	Exon	||	S100pbp	||	1	2	3	||	0	0.155952	-0.155952	||	0	1	0	|	0	7	0	|	0	8	0	||	1	5	0.2	|	1	8	0.125	|	1	7	0.142857	||	Differentially Edited	0.0203947
chr16:93835276	chr16	93835276	+	Intron	||	Morc3	||	5	3	3	||	0.0294118	0.178509	-0.149097	||	0	5	0	|	3	34	0.0882353	|	0	24	0	||	1	8	0.125	|	3	15	0.2	|	4	19	0.210526	||	Differentially Edited	0.0204186
chr17:33828004	chr17	33828004	+	Intron	||	Ndufa7	||	2	2	3	||	0.0416667	0.183333	-0.141667	||	0	2	0	|	0	12	0	|	1	8	0.125	||	3	12	0.25	|	1	10	0.1	|	1	5	0.2	||	Differentially Edited	0.0800123
chrX:151825612	chrX	151825612	+	Intron	||	Huwe1	||	5	3	3	||	0.0222222	0.145726	-0.123504	||	0	8	0	|	1	15	0.0666667	|	0	9	0	||	1	5	0.2	|	2	13	0.153846	|	1	12	0.0833333	||	Differentially Edited	0.0463647
chr17:21989045	chr17	21989045	+	Intron	||	Zfp943	||	8	3	3	||	0	0.123312	-0.123312	||	0	8	0	|	0	23	0	|	0	13	0	||	1	9	0.111111	|	1	17	0.0588235	|	2	10	0.2	||	Differentially Edited	0.0958836
chr15:53244714	chr15	53244714	-	Intron	||	Ext1	||	8	3	3	||	0	0.116993	-0.116993	||	0	8	0	|	0	30	0	|	0	16	0	||	2	12	0.166667	|	1	15	0.0666667	|	2	17	0.117647	||	Differentially Edited	0.0558394
chr17:21989058	chr17	21989058	+	Intron	||	Zfp943	||	7	3	3	||	0	0.113757	-0.113757	||	0	7	0	|	0	23	0	|	0	9	0	||	1	7	0.142857	|	1	18	0.0555556	|	2	14	0.142857	||	Differentially Edited	0.0596459
chr5:104504977	chr5	104504977	+	UTR	||	Pkd2	||	4	2	3	||	0	0.11327	-0.11327	||	0	7	0	|	0	4	0	|	0	5	0	||	1	19	0.0526316	|	2	15	0.133333	|	2	13	0.153846	||	Differentially Edited	0.0669934
chr2:48896126	chr2	48896126	+	Intron	||	Acvr2a	||	5	3	3	||	0.0208333	0.133974	-0.113141	||	0	5	0	|	1	16	0.0625	|	0	13	0	||	1	5	0.2	|	2	26	0.0769231	|	1	8	0.125	||	Differentially Edited	0.0666073
chr2:126803199	chr2	126803199	-	Intron	||	Trpm7	||	14	3	3	||	0.0196078	0.107323	-0.0877154	||	0	14	0	|	0	30	0	|	2	34	0.0588235	||	2	16	0.125	|	2	44	0.0454545	|	5	33	0.151515	||	Differentially Edited	0.0923034
chr6:86527227	chr6	86527227	+	Exon	||	1600020E01Rik	||	12	3	3	||	0.0238095	0.0960317	-0.0722222	||	1	14	0.0714286	|	0	13	0	|	0	21	0	||	1	14	0.0714286	|	2	15	0.133333	|	1	12	0.0833333	||	Differentially Edited	0.0798406
chr4:116581589	chr4	116581589	+	Intron	||	Gpbp1l1	||	10	3	3	||	0	0.0691312	-0.0691312	||	0	10	0	|	0	30	0	|	0	16	0	||	1	12	0.0833333	|	1	19	0.0526316	|	1	14	0.0714286	||	Differentially Edited	0.0163045
chr17:28481998	chr17	28481998	-	Intron	||	Fkbp5	||	8	3	3	||	0	0.056426	-0.056426	||	0	12	0	|	0	40	0	|	0	8	0	||	1	14	0.0714286	|	1	30	0.0333333	|	2	31	0.0645161	||	Differentially Edited	0.0405202
chr19:4771526	chr19	4771526	-	Intron	||	Gm21992	||	21	3	3	||	0	0.0309524	-0.0309524	||	0	22	0	|	0	54	0	|	0	63	0	||	1	21	0.047619	|	2	70	0.0285714	|	1	60	0.0166667	||	Differentially Edited	0.0753516
chr9:66844910	chr9	66844910	-	UTR	||	Rab8b	||	67	3	3	||	0.0259021	0	0.0259021	||	1	67	0.0149254	|	3	147	0.0204082	|	5	118	0.0423729	||	0	141	0	|	0	164	0	|	0	215	0	||	Differentially Edited	0.0907744
chr6:124815392	chr6	124815392	-	UTR	||	Usp5	||	56	3	3	||	0.026184	0	0.026184	||	2	67	0.0298507	|	2	56	0.0357143	|	1	77	0.012987	||	0	76	0	|	0	73	0	|	0	86	0	||	Differentially Edited	0.0615068
chr11:75300610	chr11	75300610	-	UTR	||	Rpa1	||	222	3	3	||	0.0263941	0	0.0263941	||	10	285	0.0350877	|	6	289	0.0207612	|	7	300	0.0233333	||	0	334	0	|	0	222	0	|	0	506	0	||	Differentially Edited	0.0267968
chr18:56908834	chr18	56908834	-	Intron	||	2003-03-01	||	36	3	3	||	0.0265188	0	0.0265188	||	2	73	0.0273973	|	4	228	0.0175439	|	9	260	0.0346154	||	0	36	0	|	0	234	0	|	0	371	0	||	Differentially Edited	0.0330908
chr5:134221488	chr5	134221488	-	UTR	||	Gtf2ird2;Ncf1	||	108	3	3	||	0.0284388	0	0.0284388	||	7	197	0.035533	|	6	308	0.0194805	|	10	330	0.030303	||	0	292	0	|	0	108	0	|	0	394	0	||	Differentially Edited	0.0265306
chr10:80685386	chr10	80685386	-	UTR	||	Gm26541;Mob3a	||	77	3	3	||	0.0291372	0	0.0291372	||	5	168	0.0297619	|	2	164	0.0121951	|	6	132	0.0454545	||	0	113	0	|	0	77	0	|	0	108	0	||	Differentially Edited	0.093673
chr7:101411568	chr7	101411568	+	UTR	||	Arap1;Gm45837	||	44	3	3	||	0.0298441	0	0.0298441	||	2	45	0.0444444	|	1	98	0.0102041	|	3	86	0.0348837	||	0	44	0	|	0	47	0	|	0	57	0	||	Differentially Edited	0.099663
chr6:49254628	chr6	49254628	-	Intron	||	Tra2a	||	13	3	3	||	0.0357042	0.00564972	0.0300545	||	1	28	0.0357143	|	4	118	0.0338983	|	3	80	0.0375	||	0	13	0	|	1	59	0.0169492	|	0	54	0	||	Differentially Edited	0.0301037
chr4:129309878	chr4	129309878	-	UTR	||	Gm26722;Rbbp4	||	148	3	3	||	0.0304135	0	0.0304135	||	4	215	0.0186047	|	15	321	0.046729	|	5	193	0.0259067	||	0	242	0	|	0	148	0	|	0	249	0	||	Differentially Edited	0.0689113
chr3:95183578	chr3	95183578	-	UTR	||	Gabpb2	||	64	3	3	||	0.0363983	0.00406504	0.0323333	||	3	64	0.046875	|	6	134	0.0447761	|	2	114	0.0175439	||	0	77	0	|	0	115	0	|	2	164	0.0121951	||	Differentially Edited	0.0589118
chr16:20124386	chr16	20124386	+	UTR	||	Klhl24	||	93	3	3	||	0.0351831	0	0.0351831	||	5	93	0.0537634	|	6	224	0.0267857	|	4	160	0.025	||	0	119	0	|	0	158	0	|	0	115	0	||	Differentially Edited	0.0633638
chr6:66540118	chr6	66540118	+	UTR	||	Mad2l1	||	30	3	3	||	0.0355384	0	0.0355384	||	1	49	0.0204082	|	3	87	0.0344828	|	3	58	0.0517241	||	0	44	0	|	0	30	0	|	0	58	0	||	Differentially Edited	0.0592194
chr4:129309997	chr4	129309997	-	UTR	||	Gm26722;Rbbp4	||	220	3	3	||	0.036607	0.000891266	0.0357157	||	6	238	0.0252101	|	12	361	0.033241	|	15	292	0.0513699	||	1	374	0.0026738	|	0	220	0	|	0	390	0	||	Differentially Edited	0.042257
chr11:22855146	chr11	22855146	-	Intron	||	B3gnt2;Gm12057;Gm28048	||	13	3	3	||	0.03621	0	0.03621	||	1	25	0.04	|	1	71	0.0140845	|	3	55	0.0545455	||	0	15	0	|	0	13	0	|	0	29	0	||	Differentially Edited	0.0922487
chr16:32299838	chr16	32299838	+	UTR	||	Rnf168	||	47	3	3	||	0.0364088	0	0.0364088	||	1	47	0.0212766	|	3	103	0.0291262	|	4	68	0.0588235	||	0	97	0	|	0	88	0	|	0	115	0	||	Differentially Edited	0.0860828
chr2:119107888	chr2	119107888	+	intergenic	||	NA	||	15	3	3	||	0.0370153	0	0.0370153	||	1	22	0.0454545	|	2	60	0.0333333	|	1	31	0.0322581	||	0	15	0	|	0	25	0	|	0	39	0	||	Differentially Edited	0.0128149
chr5:8400777	chr5	8400777	-	Intron	||	Dbf4	||	13	3	3	||	0.037037	0	0.037037	||	1	21	0.047619	|	1	36	0.0277778	|	1	28	0.0357143	||	0	13	0	|	0	26	0	|	0	35	0	||	Differentially Edited	0.0233879
chr9:75057530	chr9	75057530	+	UTR	||	Arpp19	||	34	3	3	||	0.0373635	0	0.0373635	||	2	41	0.0487805	|	2	68	0.0294118	|	2	59	0.0338983	||	0	35	0	|	0	34	0	|	0	39	0	||	Differentially Edited	0.0236758
chr2:26004686	chr2	26004686	-	Intron	||	Ubac1	||	29	3	3	||	0.037511	0	0.037511	||	1	29	0.0344828	|	2	86	0.0232558	|	4	73	0.0547945	||	0	38	0	|	0	57	0	|	0	90	0	||	Differentially Edited	0.0555435
chr11:55110583	chr11	55110583	+	UTR	||	Gm2a	||	75	3	3	||	0.0377475	0	0.0377475	||	8	157	0.0509554	|	3	148	0.0202703	|	5	119	0.0420168	||	0	203	0	|	0	102	0	|	0	75	0	||	Differentially Edited	0.0536224
chr3:88352277	chr3	88352277	+	Exon	||	Smg5	||	21	3	3	||	0.0380261	0	0.0380261	||	2	33	0.0606061	|	2	64	0.03125	|	1	45	0.0222222	||	0	21	0	|	0	22	0	|	0	48	0	||	Differentially Edited	0.0816386
chr7:80712052	chr7	80712052	-	UTR	||	Iqgap1	||	115	3	3	||	0.0408516	0.00282486	0.0380267	||	7	161	0.0434783	|	8	231	0.034632	|	8	180	0.0444444	||	0	115	0	|	1	118	0.00847458	|	0	131	0	||	Differentially Edited	0.000871644
chr13:64290358	chr13	64290358	-	intergenic	||	Aaed1	||	38	3	3	||	0.0380292	0	0.0380292	||	1	38	0.0263158	|	1	43	0.0232558	|	4	62	0.0645161	||	0	42	0	|	0	117	0	|	0	49	0	||	Differentially Edited	0.103284
chr15:38514483	chr15	38514483	-	UTR	||	Azin1	||	241	3	3	||	0.0393798	0	0.0393798	||	7	263	0.026616	|	12	370	0.0324324	|	26	440	0.0590909	||	0	305	0	|	0	241	0	|	0	615	0	||	Differentially Edited	0.0588234
chr10:58407781	chr10	58407781	+	Intron	||	Lims1	||	18	3	3	||	0.0499601	0.010509	0.0394511	||	2	30	0.0666667	|	1	41	0.0243902	|	3	51	0.0588235	||	0	18	0	|	1	70	0.0142857	|	1	58	0.0172414	||	Differentially Edited	0.0774117
chr6:117911019	chr6	117911019	+	Intron	||	Hnrnpf	||	14	3	3	||	0.039907	0	0.039907	||	1	24	0.0416667	|	4	68	0.0588235	|	1	52	0.0192308	||	0	14	0	|	0	62	0	|	0	63	0	||	Differentially Edited	0.0735276
chr14:52294216	chr14	52294216	+	UTR	||	Tox4	||	50	3	3	||	0.0399596	0	0.0399596	||	2	50	0.04	|	5	86	0.0581395	|	2	92	0.0217391	||	0	84	0	|	0	85	0	|	0	120	0	||	Differentially Edited	0.062715
chr2:119107899	chr2	119107899	+	intergenic	||	NA	||	18	3	3	||	0.0408704	0	0.0408704	||	1	23	0.0434783	|	3	64	0.046875	|	1	31	0.0322581	||	0	18	0	|	0	28	0	|	0	40	0	||	Differentially Edited	0.0114761
chr17:33687276	chr17	33687276	-	UTR	||	2002-03-01	||	55	3	3	||	0.0424004	0.00134409	0.0410563	||	7	112	0.0625	|	3	185	0.0162162	|	8	165	0.0484848	||	0	55	0	|	0	176	0	|	1	248	0.00403226	||	Differentially Edited	0.09429
chr13:67473034	chr13	67473034	-	UTR	||	AC154510.1;Zfp874b	||	12	3	3	||	0.0413861	0	0.0413861	||	1	27	0.037037	|	1	22	0.0454545	|	1	24	0.0416667	||	0	32	0	|	0	17	0	|	0	12	0	||	Differentially Edited	0.00344093
chr3:96157983	chr3	96157983	+	UTR	||	Otud7b	||	12	3	3	||	0.0703533	0.0271998	0.0431535	||	2	30	0.0666667	|	6	62	0.0967742	|	2	42	0.047619	||	0	12	0	|	2	43	0.0465116	|	2	57	0.0350877	||	Differentially Edited	0.0973468
chr18:58678250	chr18	58678250	+	UTR	||	Isoc1	||	80	3	3	||	0.0544261	0.0108438	0.0435823	||	5	83	0.060241	|	6	80	0.075	|	3	107	0.0280374	||	1	97	0.0103093	|	0	147	0	|	2	90	0.0222222	||	Differentially Edited	0.0699002
chr17:25929603	chr17	25929603	-	Intron	||	Gm16278;Gm26694;Pigq	||	65	3	3	||	0.0435897	0	0.0435897	||	2	65	0.0307692	|	6	110	0.0545455	|	4	88	0.0454545	||	0	80	0	|	0	67	0	|	0	107	0	||	Differentially Edited	0.0243331
chr10:43607864	chr10	43607864	+	Intron	||	F930017D23Rik	||	20	3	3	||	0.0442761	0	0.0442761	||	1	20	0.05	|	3	110	0.0272727	|	6	108	0.0555556	||	0	35	0	|	0	72	0	|	0	144	0	||	Differentially Edited	0.0361255
chr6:120673399	chr6	120673399	+	Intron	||	Cecr2	||	12	3	3	||	0.0443653	0	0.0443653	||	1	19	0.0526316	|	3	110	0.0272727	|	5	94	0.0531915	||	0	12	0	|	0	16	0	|	0	42	0	||	Differentially Edited	0.0351743
chr4:108233290	chr4	108233290	-	UTR	||	Zyg11b	||	31	3	3	||	0.0444391	0	0.0444391	||	1	32	0.03125	|	3	54	0.0555556	|	2	43	0.0465116	||	0	33	0	|	0	76	0	|	0	31	0	||	Differentially Edited	0.0245388
chr6:66540192	chr6	66540192	+	UTR	||	Mad2l1	||	18	3	3	||	0.0453053	0	0.0453053	||	2	51	0.0392157	|	2	85	0.0235294	|	3	41	0.0731707	||	0	45	0	|	0	18	0	|	0	52	0	||	Differentially Edited	0.0905817
chr9:65902623	chr9	65902623	+	UTR	||	Pclaf;Trip4	||	175	3	3	||	0.0471647	0.00175901	0.0454057	||	8	349	0.0229226	|	25	500	0.05	|	12	175	0.0685714	||	0	298	0	|	0	223	0	|	2	379	0.00527704	||	Differentially Edited	0.0732154
chr11:75300565	chr11	75300565	-	UTR	||	Rpa1	||	259	3	3	||	0.046802	0	0.046802	||	20	290	0.0689655	|	11	304	0.0361842	|	11	312	0.0352564	||	0	400	0	|	0	259	0	|	0	568	0	||	Differentially Edited	0.0517786
chr18:44424703	chr18	44424703	+	UTR	||	Dcp2	||	43	3	3	||	0.0469257	0	0.0469257	||	3	59	0.0508475	|	6	105	0.0571429	|	2	61	0.0327869	||	0	67	0	|	0	59	0	|	0	43	0	||	Differentially Edited	0.0233515
chr5:107796554	chr5	107796554	-	Intron	||	Evi5	||	17	3	3	||	0.047105	0	0.047105	||	1	17	0.0588235	|	2	54	0.037037	|	1	22	0.0454545	||	0	18	0	|	0	36	0	|	0	53	0	||	Differentially Edited	0.0176544
chr2:119104886	chr2	119104886	+	UTR	||	Knl1	||	38	3	3	||	0.0476674	0	0.0476674	||	3	38	0.0789474	|	3	134	0.0223881	|	5	120	0.0416667	||	0	78	0	|	0	105	0	|	0	134	0	||	Differentially Edited	0.102903
chr2:119104417	chr2	119104417	+	UTR	||	Knl1	||	72	3	3	||	0.0477441	0	0.0477441	||	3	72	0.0416667	|	4	130	0.0307692	|	8	113	0.0707965	||	0	72	0	|	0	88	0	|	0	158	0	||	Differentially Edited	0.0572939
chr11:75300622	chr11	75300622	-	UTR	||	Rpa1	||	233	3	3	||	0.0479561	0	0.0479561	||	18	299	0.0602007	|	10	301	0.0332226	|	17	337	0.0504451	||	0	339	0	|	0	233	0	|	0	540	0	||	Differentially Edited	0.025996
chr7:80712286	chr7	80712286	-	UTR	||	Iqgap1	||	31	3	3	||	0.0479778	0	0.0479778	||	4	62	0.0645161	|	3	112	0.0267857	|	3	57	0.0526316	||	0	62	0	|	0	31	0	|	0	41	0	||	Differentially Edited	0.0498909
chr14:31700920	chr14	31700920	-	UTR	||	Ankrd28	||	37	3	3	||	0.0482529	0	0.0482529	||	1	46	0.0217391	|	6	87	0.0689655	|	2	37	0.0540541	||	0	60	0	|	0	51	0	|	0	80	0	||	Differentially Edited	0.0742637
chr6:66540722	chr6	66540722	+	UTR	||	Mad2l1	||	114	3	3	||	0.0483815	0	0.0483815	||	13	201	0.0646766	|	15	227	0.0660793	|	2	139	0.0143885	||	0	226	0	|	0	114	0	|	0	207	0	||	Differentially Edited	0.104485
chr6:66540193	chr6	66540193	+	UTR	||	Mad2l1	||	18	3	3	||	0.0485009	0	0.0485009	||	4	54	0.0740741	|	2	84	0.0238095	|	2	42	0.047619	||	0	45	0	|	0	18	0	|	0	55	0	||	Differentially Edited	0.0791028
chr3:105738199	chr3	105738199	-	Intron	||	Rap1a	||	24	3	3	||	0.0488428	0	0.0488428	||	3	49	0.0612245	|	2	37	0.0540541	|	1	32	0.03125	||	0	42	0	|	0	24	0	|	0	34	0	||	Differentially Edited	0.0325677
chr17:25929488	chr17	25929488	-	Intron	||	Gm16278;Gm26694;Pigq	||	59	3	3	||	0.0490491	0	0.0490491	||	4	69	0.057971	|	5	122	0.0409836	|	4	83	0.0481928	||	0	71	0	|	0	59	0	|	0	147	0	||	Differentially Edited	0.00992219
chr3:27146217	chr3	27146217	-	Intron	||	Ect2	||	14	3	3	||	0.0490741	0	0.0490741	||	1	20	0.05	|	1	24	0.0416667	|	1	18	0.0555556	||	0	14	0	|	0	30	0	|	0	24	0	||	Differentially Edited	0.00669611
chr13:111717718	chr13	111717718	+	UTR	||	Mier3	||	57	3	3	||	0.0491838	0	0.0491838	||	4	58	0.0689655	|	4	102	0.0392157	|	5	127	0.0393701	||	0	57	0	|	0	73	0	|	0	140	0	||	Differentially Edited	0.0381433
chr11:68986892	chr11	68986892	-	UTR	||	Pfas	||	12	3	3	||	0.0492063	0	0.0492063	||	1	12	0.0833333	|	1	28	0.0357143	|	1	35	0.0285714	||	0	26	0	|	0	22	0	|	0	38	0	||	Differentially Edited	0.103424
chr3:58451451	chr3	58451451	+	Intron	||	Tsc22d2	||	16	3	3	||	0.0815054	0.0310292	0.0504762	||	2	25	0.08	|	3	30	0.1	|	4	62	0.0645161	||	0	16	0	|	2	31	0.0645161	|	1	35	0.0285714	||	Differentially Edited	0.0955067
chr2:5021291	chr2	5021291	-	UTR	||	Optn	||	41	3	3	||	0.051537	0	0.051537	||	5	61	0.0819672	|	2	75	0.0266667	|	4	87	0.045977	||	0	41	0	|	0	56	0	|	0	127	0	||	Differentially Edited	0.0862595
chr9:66373604	chr9	66373604	+	Exon	||	Herc1	||	63	3	3	||	0.053152	0.00161031	0.0515417	||	7	82	0.0853659	|	7	152	0.0460526	|	3	107	0.0280374	||	0	63	0	|	0	90	0	|	1	207	0.00483092	||	Differentially Edited	0.0917284
chr17:35858890	chr17	35858890	+	UTR	||	Mdc1	||	32	3	3	||	0.0519003	0	0.0519003	||	2	39	0.0512821	|	3	59	0.0508475	|	3	56	0.0535714	||	0	37	0	|	0	32	0	|	0	74	0	||	Differentially Edited	0.000264925
chr13:24814619	chr13	24814619	+	intergenic	||	BC005537	||	18	3	3	||	0.0524096	0	0.0524096	||	1	18	0.0555556	|	1	21	0.047619	|	2	37	0.0540541	||	0	21	0	|	0	60	0	|	0	68	0	||	Differentially Edited	0.00215017
chr17:87991209	chr17	87991209	-	UTR	||	Fbxo11	||	18	3	3	||	0.0526859	0	0.0526859	||	3	38	0.0789474	|	5	96	0.0520833	|	1	37	0.027027	||	0	18	0	|	0	42	0	|	0	33	0	||	Differentially Edited	0.0722922
chr2:119106971	chr2	119106971	+	intergenic	||	NA	||	8	3	3	||	0.0527141	0	0.0527141	||	1	19	0.0526316	|	4	93	0.0430108	|	1	16	0.0625	||	0	8	0	|	0	16	0	|	0	63	0	||	Differentially Edited	0.0112004
chr6:47548729	chr6	47548729	-	Intron	||	Ezh2;Gm26625	||	9	3	3	||	0.0527422	0	0.0527422	||	1	16	0.0625	|	2	45	0.0444444	|	2	39	0.0512821	||	0	9	0	|	0	9	0	|	0	21	0	||	Differentially Edited	0.00981147
chrX:150984548	chrX	150984548	-	UTR	||	Gnl3l	||	14	3	3	||	0.0527778	0	0.0527778	||	1	15	0.0666667	|	1	20	0.05	|	1	24	0.0416667	||	0	14	0	|	0	23	0	|	0	22	0	||	Differentially Edited	0.0188442
chr5:8901344	chr5	8901344	+	Intron	||	Abcb4	||	14	3	3	||	0.0528476	0	0.0528476	||	1	14	0.0714286	|	2	58	0.0344828	|	2	38	0.0526316	||	0	35	0	|	0	65	0	|	0	104	0	||	Differentially Edited	0.0384017
chr2:119104352	chr2	119104352	+	UTR	||	Knl1	||	68	3	3	||	0.0529615	0	0.0529615	||	3	70	0.0428571	|	6	125	0.048	|	10	147	0.0680272	||	0	68	0	|	0	107	0	|	0	193	0	||	Differentially Edited	0.020376
chr14:73261045	chr14	73261045	-	Intron	||	Rb1	||	8	3	3	||	0.059411	0.00628931	0.0531217	||	1	14	0.0714286	|	3	43	0.0697674	|	1	27	0.037037	||	0	8	0	|	0	39	0	|	1	53	0.0188679	||	Differentially Edited	0.0233549
chr3:100468477	chr3	100468477	-	UTR	||	Fam46c	||	399	3	3	||	0.0533323	0	0.0533323	||	12	399	0.0300752	|	55	824	0.0667476	|	41	649	0.0631741	||	0	580	0	|	0	1490	0	|	0	1221	0	||	Differentially Edited	0.0447254
chr7:27821617	chr7	27821617	+	intergenic	||	Zfp626	||	17	3	3	||	0.0534123	0	0.0534123	||	1	24	0.0416667	|	2	37	0.0540541	|	2	31	0.0645161	||	0	17	0	|	0	33	0	|	0	32	0	||	Differentially Edited	0.0149449
chr16:32017305	chr16	32017305	-	UTR	||	Pak2	||	26	3	3	||	0.0537203	0	0.0537203	||	2	26	0.0769231	|	3	47	0.0638298	|	1	49	0.0204082	||	0	40	0	|	0	52	0	|	0	46	0	||	Differentially Edited	0.0879515
chr7:113531274	chr7	113531274	+	Intron	||	Far1;Far1os	||	12	3	3	||	0.0537598	0	0.0537598	||	1	27	0.037037	|	2	60	0.0333333	|	3	33	0.0909091	||	0	12	0	|	0	20	0	|	0	20	0	||	Differentially Edited	0.10181
chr18:67617976	chr18	67617976	-	UTR	||	Cep76	||	150	3	3	||	0.0544007	0	0.0544007	||	7	150	0.0466667	|	13	212	0.0613208	|	9	163	0.0552147	||	0	187	0	|	0	211	0	|	0	358	0	||	Differentially Edited	0.00604749
chr5:142669236	chr5	142669236	+	UTR	||	Wipi2	||	57	3	3	||	0.0546366	0	0.0546366	||	5	57	0.0877193	|	5	105	0.047619	|	3	105	0.0285714	||	0	59	0	|	0	68	0	|	0	182	0	||	Differentially Edited	0.0884856
chr11:82865436	chr11	82865436	-	Intron	||	Rffl	||	8	3	3	||	0.0698413	0.0151515	0.0546898	||	1	14	0.0714286	|	4	56	0.0714286	|	2	30	0.0666667	||	0	8	0	|	1	22	0.0454545	|	0	30	0	||	Differentially Edited	0.0673892
chr17:25929466	chr17	25929466	-	Intron	||	Gm16278;Gm26694;Pigq	||	70	3	3	||	0.0547413	0	0.0547413	||	5	94	0.0531915	|	12	168	0.0714286	|	4	101	0.039604	||	0	77	0	|	0	70	0	|	0	179	0	||	Differentially Edited	0.0272131
chr10:43607795	chr10	43607795	+	Intron	||	F930017D23Rik	||	21	3	3	||	0.0553981	0	0.0553981	||	1	21	0.047619	|	5	116	0.0431034	|	8	106	0.0754717	||	0	32	0	|	0	77	0	|	0	147	0	||	Differentially Edited	0.0317952
chr17:87991307	chr17	87991307	-	UTR	||	Fbxo11	||	20	3	3	||	0.0554545	0	0.0554545	||	1	20	0.05	|	2	55	0.0363636	|	2	25	0.08	||	0	24	0	|	0	28	0	|	0	21	0	||	Differentially Edited	0.050001
chr9:98333460	chr9	98333460	+	Intron	||	Nmnat3	||	10	3	3	||	0.0555556	0	0.0555556	||	1	15	0.0666667	|	2	45	0.0444444	|	3	54	0.0555556	||	0	10	0	|	0	39	0	|	0	76	0	||	Differentially Edited	0.0130725
chr4:116552246	chr4	116552246	-	Exon	||	Gm12953;Tmem69	||	15	3	3	||	0.0659148	0.010101	0.0558138	||	2	28	0.0714286	|	1	38	0.0263158	|	2	20	0.1	||	0	41	0	|	1	33	0.030303	|	0	15	0	||	Differentially Edited	0.104645
chr4:21834805	chr4	21834805	+	UTR	||	Usp45	||	40	3	3	||	0.0560417	0	0.0560417	||	2	40	0.05	|	3	75	0.04	|	5	64	0.078125	||	0	60	0	|	0	52	0	|	0	100	0	||	Differentially Edited	0.0390589
chr9:96057172	chr9	96057172	+	UTR	||	Xrn1	||	19	3	3	||	0.0562303	0	0.0562303	||	1	19	0.0526316	|	7	78	0.0897436	|	1	38	0.0263158	||	0	39	0	|	0	73	0	|	0	50	0	||	Differentially Edited	0.0924499
chr3:103066122	chr3	103066122	+	UTR	||	Nras	||	75	3	3	||	0.0564805	0	0.0564805	||	5	75	0.0666667	|	7	166	0.0421687	|	6	99	0.0606061	||	0	81	0	|	0	135	0	|	0	112	0	||	Differentially Edited	0.0165895
chr17:36005361	chr17	36005361	-	Intron	||	A930015D03Rik	||	18	3	3	||	0.0568898	0	0.0568898	||	1	18	0.0555556	|	4	69	0.057971	|	2	35	0.0571429	||	0	37	0	|	0	55	0	|	0	53	0	||	Differentially Edited	0.000155138
chr17:35858922	chr17	35858922	+	UTR	||	Mdc1	||	35	3	3	||	0.0663952	0.00925926	0.0571359	||	3	38	0.0789474	|	3	56	0.0535714	|	4	60	0.0666667	||	1	36	0.0277778	|	0	35	0	|	0	96	0	||	Differentially Edited	0.00956082
chr5:142669235	chr5	142669235	+	UTR	||	Wipi2	||	57	3	3	||	0.0576914	0	0.0576914	||	5	57	0.0877193	|	5	105	0.047619	|	4	106	0.0377358	||	0	57	0	|	0	69	0	|	0	189	0	||	Differentially Edited	0.0635568
chr18:61588396	chr18	61588396	+	UTR	||	Csnk1a1	||	82	3	3	||	0.0583711	0	0.0583711	||	2	82	0.0243902	|	6	93	0.0645161	|	10	116	0.0862069	||	0	90	0	|	0	112	0	|	0	121	0	||	Differentially Edited	0.0842495
chr9:96057184	chr9	96057184	+	UTR	||	Xrn1	||	19	3	3	||	0.0586171	0	0.0586171	||	1	19	0.0526316	|	6	85	0.0705882	|	2	38	0.0526316	||	0	39	0	|	0	69	0	|	0	60	0	||	Differentially Edited	0.0102667
chr19:30044815	chr19	30044815	+	Intron	||	Uhrf2	||	9	3	3	||	0.0701165	0.0114943	0.0586222	||	1	12	0.0833333	|	2	31	0.0645161	|	2	32	0.0625	||	0	9	0	|	1	29	0.0344828	|	0	22	0	||	Differentially Edited	0.0188064
chr17:35858643	chr17	35858643	+	UTR	||	Mdc1	||	20	3	3	||	0.0586689	0	0.0586689	||	2	30	0.0666667	|	3	55	0.0545455	|	4	73	0.0547945	||	0	20	0	|	0	20	0	|	0	69	0	||	Differentially Edited	0.00461519
chr17:33928733	chr17	33928733	+	UTR	||	Tapbp	||	83	3	3	||	0.0591595	0	0.0591595	||	6	106	0.0566038	|	11	133	0.0827068	|	5	131	0.0381679	||	0	84	0	|	0	83	0	|	0	115	0	||	Differentially Edited	0.0445373
chr12:3431773	chr12	3431773	+	Intron	||	Asxl2	||	13	3	3	||	0.0593392	0	0.0593392	||	1	14	0.0714286	|	1	43	0.0232558	|	3	36	0.0833333	||	0	13	0	|	0	33	0	|	0	28	0	||	Differentially Edited	0.0839145
chr6:113088222	chr6	113088222	+	Intron	||	Setd5	||	7	3	3	||	0.0599797	0	0.0599797	||	1	15	0.0666667	|	4	46	0.0869565	|	1	38	0.0263158	||	0	7	0	|	0	21	0	|	0	30	0	||	Differentially Edited	0.0780867
chr17:25929548	chr17	25929548	-	Intron	||	Gm16278;Gm26694;Pigq	||	67	3	3	||	0.060452	0	0.060452	||	6	67	0.0895522	|	3	127	0.023622	|	6	88	0.0681818	||	0	83	0	|	0	71	0	|	0	136	0	||	Differentially Edited	0.0895601
chr14:14118496	chr14	14118496	-	Intron	||	Psmd6	||	19	3	3	||	0.0996038	0.0391288	0.060475	||	2	19	0.105263	|	4	31	0.129032	|	2	31	0.0645161	||	1	21	0.047619	|	3	43	0.0697674	|	0	42	0	||	Differentially Edited	0.0966207
chr6:98926510	chr6	98926510	-	UTR	||	Foxp1	||	25	3	3	||	0.0604817	0	0.0604817	||	4	42	0.0952381	|	3	58	0.0517241	|	2	58	0.0344828	||	0	25	0	|	0	40	0	|	0	27	0	||	Differentially Edited	0.0789028
chr14:86911610	chr14	86911610	-	Intron	||	Diaph3	||	6	3	3	||	0.0606986	0	0.0606986	||	1	19	0.0526316	|	3	32	0.09375	|	1	28	0.0357143	||	0	6	0	|	0	25	0	|	0	34	0	||	Differentially Edited	0.0720014
chr11:75177367	chr11	75177367	-	UTR	||	1700016P03Rik;Ovca2	||	24	3	3	||	0.0615688	0	0.0615688	||	2	27	0.0740741	|	2	29	0.0689655	|	1	24	0.0416667	||	0	29	0	|	0	29	0	|	0	26	0	||	Differentially Edited	0.0256727
chr7:127526680	chr7	127526680	+	Exon	||	Gm42715;Srcap	||	9	3	3	||	0.0615741	0	0.0615741	||	1	16	0.0625	|	1	18	0.0555556	|	1	15	0.0666667	||	0	9	0	|	0	16	0	|	0	16	0	||	Differentially Edited	0.00275863
chr6:145130343	chr6	145130343	+	Intron	||	Lrmp	||	5	3	3	||	0.0616162	0	0.0616162	||	1	12	0.0833333	|	3	44	0.0681818	|	1	30	0.0333333	||	0	10	0	|	0	5	0	|	0	21	0	||	Differentially Edited	0.0531534
chr17:33688353	chr17	33688353	-	Intron	||	2002-03-01	||	31	3	3	||	0.0617264	0	0.0617264	||	3	33	0.0909091	|	2	101	0.019802	|	7	94	0.0744681	||	0	31	0	|	0	109	0	|	0	146	0	||	Differentially Edited	0.10287
chr17:35858619	chr17	35858619	+	UTR	||	Mdc1	||	20	3	3	||	0.0622092	0	0.0622092	||	1	26	0.0384615	|	3	56	0.0535714	|	7	74	0.0945946	||	0	20	0	|	0	28	0	|	0	75	0	||	Differentially Edited	0.0655996
chr12:16989434	chr12	16989434	-	UTR	||	Pqlc3	||	98	3	3	||	0.0625639	0	0.0625639	||	7	119	0.0588235	|	8	156	0.0512821	|	9	116	0.0775862	||	0	136	0	|	0	98	0	|	0	109	0	||	Differentially Edited	0.0152672
chr17:24856092	chr17	24856092	+	Intron	||	Hagh	||	5	3	3	||	0.0713514	0.00877193	0.0625795	||	1	20	0.05	|	2	33	0.0606061	|	3	29	0.103448	||	0	5	0	|	0	22	0	|	1	38	0.0263158	||	Differentially Edited	0.0418996
chr4:21834757	chr4	21834757	+	UTR	||	Usp45	||	27	3	3	||	0.0628177	0	0.0628177	||	1	27	0.037037	|	3	51	0.0588235	|	5	54	0.0925926	||	0	42	0	|	0	36	0	|	0	78	0	||	Differentially Edited	0.0602682
chr12:5016136	chr12	5016136	+	Intron	||	Atad2b	||	11	3	3	||	0.0632779	0	0.0632779	||	1	11	0.0909091	|	2	62	0.0322581	|	2	30	0.0666667	||	0	20	0	|	0	43	0	|	0	44	0	||	Differentially Edited	0.0653055
chr2:5021299	chr2	5021299	-	UTR	||	Optn	||	41	3	3	||	0.063769	0	0.063769	||	2	59	0.0338983	|	5	79	0.0632911	|	8	85	0.0941176	||	0	41	0	|	0	55	0	|	0	123	0	||	Differentially Edited	0.0669499
chr1:36930463	chr1	36930463	-	Intron	||	Tmem131	||	7	3	3	||	0.0640698	0	0.0640698	||	1	14	0.0714286	|	3	65	0.0461538	|	5	67	0.0746269	||	0	7	0	|	0	62	0	|	0	58	0	||	Differentially Edited	0.0191893
chr12:116285607	chr12	116285607	+	Intron	||	Esyt2	||	14	3	3	||	0.0655864	0	0.0655864	||	1	16	0.0625	|	5	54	0.0925926	|	1	24	0.0416667	||	0	14	0	|	0	23	0	|	0	35	0	||	Differentially Edited	0.0472265
chr7:55977627	chr7	55977627	-	UTR	||	A230056P14Rik;Nipa1	||	20	3	3	||	0.0659498	0	0.0659498	||	2	20	0.1	|	2	31	0.0645161	|	1	30	0.0333333	||	0	25	0	|	0	38	0	|	0	59	0	||	Differentially Edited	0.0757153
chr5:121233568	chr5	121233568	+	Intron	||	Hectd4	||	15	3	3	||	0.0659933	0	0.0659933	||	1	15	0.0666667	|	5	66	0.0757576	|	1	18	0.0555556	||	0	18	0	|	0	22	0	|	0	46	0	||	Differentially Edited	0.00774438
chr11:75739726	chr11	75739726	+	Intron	||	Ywhae	||	7	3	3	||	0.0660779	0	0.0660779	||	2	19	0.105263	|	2	63	0.031746	|	3	49	0.0612245	||	0	7	0	|	0	20	0	|	0	18	0	||	Differentially Edited	0.0905348
chr18:56956509	chr18	56956509	-	UTR	||	C330018D20Rik	||	3	3	2	||	0.0664582	0	0.0664582	||	1	14	0.0714286	|	1	11	0.0909091	|	1	27	0.037037	||	0	5	0	|	0	3	0	|	0	18	0	||	Differentially Edited	0.0518293
chr8:94017332	chr8	94017332	-	intergenic	||	Nudt21	||	8	3	3	||	0.0670898	0	0.0670898	||	1	12	0.0833333	|	1	37	0.027027	|	1	11	0.0909091	||	0	8	0	|	0	8	0	|	0	20	0	||	Differentially Edited	0.0795892
chr2:120600863	chr2	120600863	+	UTR	||	Snap23	||	10	3	3	||	0.067094	0	0.067094	||	1	10	0.1	|	2	39	0.0512821	|	1	20	0.05	||	0	21	0	|	0	53	0	|	0	26	0	||	Differentially Edited	0.0552277
chr9:120123332	chr9	120123332	+	Intron	||	Slc25a38	||	23	3	3	||	0.0674063	0	0.0674063	||	3	34	0.0882353	|	1	37	0.027027	|	2	23	0.0869565	||	0	49	0	|	0	30	0	|	0	39	0	||	Differentially Edited	0.0792249
chr2:18214722	chr2	18214722	-	UTR	||	Dnajc1	||	9	3	3	||	0.0675439	0	0.0675439	||	1	15	0.0666667	|	1	19	0.0526316	|	1	12	0.0833333	||	0	9	0	|	0	16	0	|	0	17	0	||	Differentially Edited	0.0168254
chr8:72480261	chr8	72480261	-	intergenic	||	NA	||	14	3	3	||	0.0678084	0	0.0678084	||	1	19	0.0526316	|	2	21	0.0952381	|	1	18	0.0555556	||	0	14	0	|	0	26	0	|	0	28	0	||	Differentially Edited	0.0386957
chr6:128361794	chr6	128361794	-	Intron	||	Rhno1	||	11	3	3	||	0.0678571	0	0.0678571	||	2	21	0.0952381	|	1	40	0.025	|	2	24	0.0833333	||	0	11	0	|	0	20	0	|	0	45	0	||	Differentially Edited	0.0888646
chr11:75300618	chr11	75300618	-	UTR	||	Rpa1	||	240	3	3	||	0.0740396	0.00588591	0.0681537	||	23	309	0.0744337	|	20	305	0.0655738	|	28	341	0.0821114	||	2	350	0.00571429	|	2	240	0.00833333	|	2	554	0.00361011	||	Differentially Edited	0.00282259
chr6:66540825	chr6	66540825	+	UTR	||	Mad2l1	||	225	3	3	||	0.0681883	0	0.0681883	||	32	392	0.0816327	|	23	415	0.0554217	|	16	237	0.0675105	||	0	375	0	|	0	225	0	|	0	351	0	||	Differentially Edited	0.012114
chrX:150985654	chrX	150985654	-	UTR	||	Gnl3l	||	50	3	3	||	0.0685263	0	0.0685263	||	5	54	0.0925926	|	6	79	0.0759494	|	3	81	0.037037	||	0	50	0	|	0	101	0	|	0	89	0	||	Differentially Edited	0.0531471
chr2:119105627	chr2	119105627	+	intergenic	||	NA	||	33	3	3	||	0.0688184	0	0.0688184	||	3	33	0.0909091	|	3	68	0.0441176	|	3	42	0.0714286	||	0	37	0	|	0	39	0	|	0	72	0	||	Differentially Edited	0.0367542
chr17:33928729	chr17	33928729	+	UTR	||	Tapbp	||	81	3	3	||	0.0691706	0	0.0691706	||	11	102	0.107843	|	5	128	0.0390625	|	8	132	0.0606061	||	0	81	0	|	0	82	0	|	0	112	0	||	Differentially Edited	0.0764694
chr2:119610081	chr2	119610081	-	UTR	||	Oip5	||	62	3	3	||	0.0694374	0	0.0694374	||	7	62	0.112903	|	3	82	0.0365854	|	4	68	0.0588235	||	0	83	0	|	0	104	0	|	0	121	0	||	Differentially Edited	0.0920396
chr2:126892857	chr2	126892857	-	UTR	||	Sppl2a	||	11	3	3	||	0.0698413	0	0.0698413	||	2	21	0.0952381	|	2	42	0.047619	|	2	30	0.0666667	||	0	23	0	|	0	11	0	|	0	15	0	||	Differentially Edited	0.0370862
chr5:20907970	chr5	20907970	-	Intron	||	Rsbn1l	||	7	3	3	||	0.0778772	0.00775194	0.0701252	||	2	17	0.117647	|	1	27	0.037037	|	3	38	0.0789474	||	0	7	0	|	0	45	0	|	1	43	0.0232558	||	Differentially Edited	0.082528
chr12:11239338	chr12	11239338	-	intergenic	||	Gen1	||	19	3	3	||	0.0702027	0	0.0702027	||	4	37	0.108108	|	2	50	0.04	|	2	32	0.0625	||	0	19	0	|	0	43	0	|	0	78	0	||	Differentially Edited	0.0726773
chr2:121543631	chr2	121543631	+	UTR	||	Wdr76	||	24	3	3	||	0.0703175	0	0.0703175	||	2	24	0.0833333	|	2	42	0.047619	|	4	50	0.08	||	0	41	0	|	0	42	0	|	0	67	0	||	Differentially Edited	0.0252477
chr12:11239330	chr12	11239330	-	intergenic	||	Gen1	||	22	3	3	||	0.0707428	0	0.0707428	||	3	40	0.075	|	2	46	0.0434783	|	3	32	0.09375	||	0	22	0	|	0	39	0	|	0	77	0	||	Differentially Edited	0.0404008
chr4:21834818	chr4	21834818	+	UTR	||	Usp45	||	44	3	3	||	0.0709416	0	0.0709416	||	3	44	0.0681818	|	7	80	0.0875	|	4	70	0.0571429	||	0	65	0	|	0	60	0	|	0	121	0	||	Differentially Edited	0.0152803
chr9:20927802	chr9	20927802	-	Intron	||	Dnmt1	||	17	3	3	||	0.0709557	0	0.0709557	||	2	19	0.105263	|	2	41	0.0487805	|	1	17	0.0588235	||	0	27	0	|	0	39	0	|	0	55	0	||	Differentially Edited	0.0551847
chr1:63049607	chr1	63049607	-	UTR	||	Ino80d	||	13	3	3	||	0.0710675	0	0.0710675	||	2	17	0.117647	|	1	25	0.04	|	1	18	0.0555556	||	0	13	0	|	0	21	0	|	0	22	0	||	Differentially Edited	0.0956711
chr14:86911663	chr14	86911663	-	Intron	||	Diaph3	||	7	3	3	||	0.0713553	0	0.0713553	||	1	13	0.0769231	|	2	35	0.0571429	|	2	25	0.08	||	0	7	0	|	0	17	0	|	0	35	0	||	Differentially Edited	0.0099233
chr17:46774937	chr17	46774937	-	UTR	||	Gm26904;Rpl7l1	||	33	3	3	||	0.0714606	0	0.0714606	||	8	81	0.0987654	|	1	47	0.0212766	|	5	53	0.0943396	||	0	59	0	|	0	33	0	|	0	43	0	||	Differentially Edited	0.104578
chr17:36004408	chr17	36004408	-	Intron	||	A930015D03Rik	||	13	3	3	||	0.0715155	0	0.0715155	||	2	23	0.0869565	|	10	111	0.0900901	|	3	80	0.0375	||	0	13	0	|	0	38	0	|	0	94	0	||	Differentially Edited	0.0523076
chr2:121544268	chr2	121544268	+	UTR	||	Wdr76	||	18	3	3	||	0.0717485	0	0.0717485	||	1	18	0.0555556	|	4	43	0.0930233	|	3	45	0.0666667	||	0	28	0	|	0	41	0	|	0	57	0	||	Differentially Edited	0.0231499
chr10:80685976	chr10	80685976	-	UTR	||	Gm26541;Mob3a	||	86	3	3	||	0.0856757	0.0139248	0.071751	||	15	127	0.11811	|	15	179	0.0837989	|	7	127	0.0551181	||	2	108	0.0185185	|	2	86	0.0232558	|	0	100	0	||	Differentially Edited	0.0444384
chr18:56956958	chr18	56956958	-	UTR	||	C330018D20Rik	||	11	3	3	||	0.0730994	0	0.0730994	||	1	12	0.0833333	|	2	24	0.0833333	|	1	19	0.0526316	||	0	11	0	|	0	15	0	|	0	21	0	||	Differentially Edited	0.019042
chr17:36004512	chr17	36004512	-	Intron	||	A930015D03Rik	||	25	3	3	||	0.073229	0	0.073229	||	3	34	0.0882353	|	7	124	0.0564516	|	6	80	0.075	||	0	25	0	|	0	45	0	|	0	100	0	||	Differentially Edited	0.0154779
chr7:55977619	chr7	55977619	-	UTR	||	A230056P14Rik;Nipa1	||	21	3	3	||	0.0741653	0	0.0741653	||	1	21	0.047619	|	3	29	0.103448	|	2	28	0.0714286	||	0	24	0	|	0	38	0	|	0	60	0	||	Differentially Edited	0.0444171
chr2:121543633	chr2	121543633	+	UTR	||	Wdr76	||	22	3	3	||	0.0741806	0	0.0741806	||	2	22	0.0909091	|	2	40	0.05	|	4	49	0.0816327	||	0	40	0	|	0	40	0	|	0	67	0	||	Differentially Edited	0.0267539
chr8:72482674	chr8	72482674	-	UTR	||	Slc35e1	||	67	3	3	||	0.0741934	0	0.0741934	||	4	67	0.0597015	|	7	88	0.0795455	|	12	144	0.0833333	||	0	69	0	|	0	87	0	|	0	135	0	||	Differentially Edited	0.00961484
chr2:119608861	chr2	119608861	-	intergenic	||	NA	||	23	3	3	||	0.0742718	0	0.0742718	||	1	23	0.0434783	|	4	38	0.105263	|	2	27	0.0740741	||	0	32	0	|	0	36	0	|	0	41	0	||	Differentially Edited	0.0531167
chr2:119608848	chr2	119608848	-	intergenic	||	NA	||	23	3	3	||	0.0743383	0	0.0743383	||	1	23	0.0434783	|	4	37	0.108108	|	2	28	0.0714286	||	0	32	0	|	0	36	0	|	0	39	0	||	Differentially Edited	0.0579203
chr14:30822329	chr14	30822329	+	UTR	||	Sfmbt1	||	32	3	3	||	0.0746142	0	0.0746142	||	4	40	0.1	|	1	32	0.03125	|	5	54	0.0925926	||	0	42	0	|	0	59	0	|	0	79	0	||	Differentially Edited	0.0757078
chr16:32299891	chr16	32299891	+	UTR	||	Rnf168	||	32	3	3	||	0.0750737	0	0.0750737	||	2	32	0.0625	|	4	71	0.056338	|	5	47	0.106383	||	0	62	0	|	0	56	0	|	0	70	0	||	Differentially Edited	0.0413322
chr17:35858886	chr17	35858886	+	UTR	||	Mdc1	||	32	3	3	||	0.0752183	0	0.0752183	||	2	40	0.05	|	5	59	0.0847458	|	5	55	0.0909091	||	0	38	0	|	0	32	0	|	0	74	0	||	Differentially Edited	0.0274846
chr2:121544136	chr2	121544136	+	UTR	||	Wdr76	||	66	3	3	||	0.0752779	0	0.0752779	||	8	74	0.108108	|	9	107	0.0841121	|	4	119	0.0336134	||	0	66	0	|	0	82	0	|	0	113	0	||	Differentially Edited	0.0755402
chr17:36006564	chr17	36006564	-	UTR	||	A930015D03Rik;H2-T24	||	11	3	3	||	0.0756179	0	0.0756179	||	1	14	0.0714286	|	2	31	0.0645161	|	1	11	0.0909091	||	0	13	0	|	0	17	0	|	0	24	0	||	Differentially Edited	0.0107435
chr2:91015870	chr2	91015870	+	UTR	||	Celf1	||	34	3	3	||	0.075667	0	0.075667	||	3	49	0.0612245	|	6	89	0.0674157	|	6	61	0.0983607	||	0	34	0	|	0	49	0	|	0	69	0	||	Differentially Edited	0.022278
chr2:119107925	chr2	119107925	+	intergenic	||	NA	||	23	3	3	||	0.0757081	0	0.0757081	||	1	24	0.0416667	|	7	72	0.0972222	|	3	34	0.0882353	||	0	23	0	|	0	33	0	|	0	49	0	||	Differentially Edited	0.0480234
chr1:58797104	chr1	58797104	+	Intron	||	Casp8	||	8	3	3	||	0.0758333	0	0.0758333	||	1	8	0.125	|	1	25	0.04	|	1	16	0.0625	||	0	8	0	|	0	13	0	|	0	27	0	||	Differentially Edited	0.0964375
chr8:84906504	chr8	84906504	+	intergenic	||	NA	||	7	3	3	||	0.0759297	0	0.0759297	||	1	10	0.1	|	2	29	0.0689655	|	1	17	0.0588235	||	0	7	0	|	0	30	0	|	0	34	0	||	Differentially Edited	0.0255931
chr4:21836550	chr4	21836550	+	UTR	||	Usp45	||	42	3	3	||	0.07653	0	0.07653	||	4	42	0.0952381	|	3	78	0.0384615	|	7	73	0.0958904	||	0	49	0	|	0	60	0	|	0	117	0	||	Differentially Edited	0.0566589
chr17:36004721	chr17	36004721	-	Intron	||	A930015D03Rik	||	26	3	3	||	0.076786	0	0.076786	||	3	34	0.0882353	|	7	122	0.057377	|	5	59	0.0847458	||	0	26	0	|	0	35	0	|	0	79	0	||	Differentially Edited	0.0157642
chr4:11236975	chr4	11236975	-	Intron	||	Ints8	||	7	3	3	||	0.0769418	0	0.0769418	||	1	15	0.0666667	|	4	34	0.117647	|	2	43	0.0465116	||	0	7	0	|	0	27	0	|	0	20	0	||	Differentially Edited	0.0680534
chr4:116552236	chr4	116552236	-	Exon	||	Gm12953;Tmem69	||	13	3	3	||	0.0769925	0	0.0769925	||	1	25	0.04	|	3	35	0.0857143	|	2	19	0.105263	||	0	38	0	|	0	33	0	|	0	13	0	||	Differentially Edited	0.0576808
chr16:32300361	chr16	32300361	+	UTR	||	Rnf168	||	72	3	3	||	0.077337	0	0.077337	||	3	72	0.0416667	|	9	97	0.0927835	|	8	82	0.097561	||	0	78	0	|	0	72	0	|	0	113	0	||	Differentially Edited	0.0495584
chr9:123520918	chr9	123520918	+	UTR	||	Limd1	||	81	3	3	||	0.0895486	0.0116318	0.0779168	||	11	83	0.13253	|	8	121	0.0661157	|	7	100	0.07	||	2	81	0.0246914	|	0	94	0	|	1	98	0.0102041	||	Differentially Edited	0.0565687
chr4:8866941	chr4	8866941	+	UTR	||	Chd7	||	13	3	3	||	0.078022	0	0.078022	||	1	13	0.0769231	|	2	40	0.05	|	3	28	0.107143	||	0	17	0	|	0	19	0	|	0	40	0	||	Differentially Edited	0.0419537
chr6:118125335	chr6	118125335	-	Exon	||	Csgalnact2	||	11	3	3	||	0.0781663	0	0.0781663	||	1	15	0.0666667	|	3	33	0.0909091	|	1	13	0.0769231	||	0	11	0	|	0	17	0	|	0	25	0	||	Differentially Edited	0.00798216
chr11:75301000	chr11	75301000	-	UTR	||	Rpa1	||	200	3	3	||	0.0944081	0.0157991	0.078609	||	24	255	0.0941176	|	17	201	0.0845771	|	30	287	0.10453	||	6	341	0.0175953	|	2	200	0.01	|	8	404	0.019802	||	Differentially Edited	0.00122209
chr2:119104959	chr2	119104959	+	UTR	||	Knl1	||	30	3	3	||	0.0788419	0	0.0788419	||	2	30	0.0666667	|	7	111	0.0630631	|	11	103	0.106796	||	0	53	0	|	0	87	0	|	0	134	0	||	Differentially Edited	0.0301789
chr9:21755850	chr9	21755850	-	UTR	||	Spc24	||	43	3	3	||	0.0790769	0	0.0790769	||	8	79	0.101266	|	6	114	0.0526316	|	5	60	0.0833333	||	0	121	0	|	0	43	0	|	0	97	0	||	Differentially Edited	0.0307653
chr5:135909342	chr5	135909342	-	UTR	||	Ywhag	||	34	3	3	||	0.0792805	0	0.0792805	||	8	69	0.115942	|	4	57	0.0701754	|	3	58	0.0517241	||	0	73	0	|	0	34	0	|	0	60	0	||	Differentially Edited	0.0533745
chr2:181518259	chr2	181518259	+	intergenic	||	NA	||	8	3	3	||	0.0797536	0	0.0797536	||	1	13	0.0769231	|	1	14	0.0714286	|	1	11	0.0909091	||	0	11	0	|	0	16	0	|	0	8	0	||	Differentially Edited	0.0052452
chr19:40740999	chr19	40740999	+	UTR	||	Entpd1	||	8	3	3	||	0.0798067	0	0.0798067	||	1	8	0.125	|	2	29	0.0689655	|	1	22	0.0454545	||	0	11	0	|	0	22	0	|	0	18	0	||	Differentially Edited	0.0773918
chr2:5869245	chr2	5869245	+	UTR	||	Nudt5	||	10	3	3	||	0.0804714	0	0.0804714	||	1	10	0.1	|	1	33	0.030303	|	2	18	0.111111	||	0	26	0	|	0	21	0	|	0	16	0	||	Differentially Edited	0.0861807
chr13:67473055	chr13	67473055	-	UTR	||	AC154510.1;Zfp874b	||	9	3	3	||	0.0811966	0	0.0811966	||	2	18	0.111111	|	1	13	0.0769231	|	1	18	0.0555556	||	0	15	0	|	0	16	0	|	0	9	0	||	Differentially Edited	0.0374862
chr3:116629371	chr3	116629371	+	UTR	||	Gm42893;Sass6	||	3	3	2	||	0.0815142	0	0.0815142	||	3	24	0.125	|	1	26	0.0384615	|	3	37	0.0810811	||	0	3	0	|	0	16	0	|	0	19	0	||	Differentially Edited	0.0824759
chr13:14052057	chr13	14052057	-	intergenic	||	Ggps1	||	39	3	3	||	0.0818681	0	0.0818681	||	3	39	0.0769231	|	4	65	0.0615385	|	6	56	0.107143	||	0	41	0	|	0	48	0	|	0	46	0	||	Differentially Edited	0.0257414
chr16:16880872	chr16	16880872	+	Intron	||	Top3b	||	14	3	3	||	0.103108	0.0208333	0.0822744	||	1	14	0.0714286	|	2	25	0.08	|	3	19	0.157895	||	1	16	0.0625	|	0	14	0	|	0	21	0	||	Differentially Edited	0.0803624
chr12:17429884	chr12	17429884	+	UTR	||	Nol10	||	13	3	3	||	0.101556	0.0190476	0.0825087	||	3	19	0.157895	|	3	31	0.0967742	|	1	20	0.05	||	2	35	0.0571429	|	0	13	0	|	0	23	0	||	Differentially Edited	0.101178
chr17:36004761	chr17	36004761	-	Intron	||	A930015D03Rik	||	12	3	3	||	0.0828127	0	0.0828127	||	2	19	0.105263	|	9	109	0.0825688	|	4	66	0.0606061	||	0	12	0	|	0	32	0	|	0	66	0	||	Differentially Edited	0.0233882
chr5:65543734	chr5	65543734	+	Intron	||	Ube2k	||	11	3	3	||	0.0920635	0.00900901	0.0830545	||	3	21	0.142857	|	2	40	0.05	|	3	36	0.0833333	||	0	11	0	|	0	23	0	|	1	37	0.027027	||	Differentially Edited	0.080164
chr1:156427550	chr1	156427550	-	UTR	||	Soat1	||	10	3	3	||	0.0833333	0	0.0833333	||	1	10	0.1	|	2	24	0.0833333	|	2	30	0.0666667	||	0	15	0	|	0	26	0	|	0	38	0	||	Differentially Edited	0.0130725
chr2:72937237	chr2	72937237	-	UTR	||	Sp3	||	74	3	3	||	0.0837333	0	0.0837333	||	10	74	0.135135	|	6	118	0.0508475	|	6	92	0.0652174	||	0	104	0	|	0	88	0	|	0	98	0	||	Differentially Edited	0.0845814
chr5:110400396	chr5	110400396	-	Intron	||	Fbrsl1	||	7	3	3	||	0.0840067	0	0.0840067	||	1	9	0.111111	|	1	20	0.05	|	1	11	0.0909091	||	0	7	0	|	0	14	0	|	0	9	0	||	Differentially Edited	0.0428645
chr11:75176346	chr11	75176346	-	UTR	||	1700016P03Rik;Ovca2	||	9	3	3	||	0.0840537	0	0.0840537	||	1	13	0.0769231	|	2	25	0.08	|	2	21	0.0952381	||	0	15	0	|	0	9	0	|	0	17	0	||	Differentially Edited	0.0045074
chr8:60974255	chr8	60974255	-	Intron	||	Clcn3	||	10	3	3	||	0.084127	0	0.084127	||	1	18	0.0555556	|	3	35	0.0857143	|	4	36	0.111111	||	0	10	0	|	0	35	0	|	0	52	0	||	Differentially Edited	0.0345534
chr3:58590823	chr3	58590823	+	UTR	||	Selenot	||	325	3	3	||	0.0843032	0	0.0843032	||	26	355	0.0732394	|	39	347	0.112392	|	22	327	0.0672783	||	0	443	0	|	0	325	0	|	0	382	0	||	Differentially Edited	0.027033
chr2:119105611	chr2	119105611	+	intergenic	||	NA	||	35	3	3	||	0.0846246	0	0.0846246	||	4	35	0.114286	|	6	69	0.0869565	|	2	38	0.0526316	||	0	38	0	|	0	41	0	|	0	69	0	||	Differentially Edited	0.0416664
chr6:66540267	chr6	66540267	+	UTR	||	Mad2l1	||	30	3	3	||	0.0846718	0	0.0846718	||	9	77	0.116883	|	9	85	0.105882	|	2	64	0.03125	||	0	55	0	|	0	30	0	|	0	64	0	||	Differentially Edited	0.0878313
chr12:111645823	chr12	111645823	+	Intron	||	Mark3	||	9	3	3	||	0.0847475	0	0.0847475	||	1	12	0.0833333	|	3	33	0.0909091	|	2	25	0.08	||	0	9	0	|	0	15	0	|	0	37	0	||	Differentially Edited	0.0014473
chr2:119104344	chr2	119104344	+	UTR	||	Knl1	||	63	3	3	||	0.0848131	0	0.0848131	||	4	63	0.0634921	|	14	125	0.112	|	12	152	0.0789474	||	0	67	0	|	0	99	0	|	0	180	0	||	Differentially Edited	0.0272956
chr15:80932397	chr15	80932397	+	UTR	||	Tnrc6b	||	3	3	2	||	0.0852474	0	0.0852474	||	2	17	0.117647	|	1	15	0.0666667	|	1	14	0.0714286	||	0	5	0	|	0	3	0	|	0	10	0	||	Differentially Edited	0.0345012
chr7:29223145	chr7	29223145	-	UTR	||	Kcnk6	||	13	3	3	||	0.0852489	0	0.0852489	||	3	25	0.12	|	1	17	0.0588235	|	1	13	0.0769231	||	0	23	0	|	0	22	0	|	0	16	0	||	Differentially Edited	0.042437
chr8:110974442	chr8	110974442	+	intergenic	||	NA	||	12	3	3	||	0.0854581	0	0.0854581	||	2	19	0.105263	|	1	25	0.04	|	3	27	0.111111	||	0	12	0	|	0	20	0	|	0	41	0	||	Differentially Edited	0.0643402
chr13:43449500	chr13	43449500	-	Intron	||	Ranbp9	||	8	3	3	||	0.0862915	0	0.0862915	||	2	15	0.133333	|	1	33	0.030303	|	2	21	0.0952381	||	0	12	0	|	0	8	0	|	0	22	0	||	Differentially Edited	0.103048
chr1:171702034	chr1	171702034	+	Intron	||	Cd48	||	4	3	2	||	0.0866013	0	0.0866013	||	1	17	0.0588235	|	1	12	0.0833333	|	2	17	0.117647	||	0	4	0	|	0	12	0	|	0	9	0	||	Differentially Edited	0.036682
chr10:58411500	chr10	58411500	+	Intron	||	Lims1	||	17	3	3	||	0.0874074	0	0.0874074	||	4	36	0.111111	|	6	54	0.111111	|	2	50	0.04	||	0	17	0	|	0	42	0	|	0	54	0	||	Differentially Edited	0.0663108
chr11:77534496	chr11	77534496	-	UTR	||	Abhd15;Taok1	||	35	3	3	||	0.0879504	0	0.0879504	||	3	35	0.0857143	|	7	71	0.0985915	|	7	88	0.0795455	||	0	68	0	|	0	68	0	|	0	67	0	||	Differentially Edited	0.00404493
chr14:73261493	chr14	73261493	-	Intron	||	Rb1	||	13	3	3	||	0.10401	0.015873	0.0881368	||	3	20	0.15	|	4	47	0.0851064	|	2	26	0.0769231	||	0	13	0	|	2	42	0.047619	|	0	44	0	||	Differentially Edited	0.0410549
chr4:21834779	chr4	21834779	+	UTR	||	Usp45	||	35	3	3	||	0.0886447	0	0.0886447	||	4	35	0.114286	|	2	70	0.0285714	|	8	65	0.123077	||	0	51	0	|	0	45	0	|	0	91	0	||	Differentially Edited	0.0987949
chr18:9963499	chr18	9963499	+	Intron	||	Thoc1	||	10	3	3	||	0.0888889	0	0.0888889	||	1	10	0.1	|	1	14	0.0714286	|	2	21	0.0952381	||	0	21	0	|	0	19	0	|	0	17	0	||	Differentially Edited	0.009741
chr18:32102928	chr18	32102928	+	UTR	||	Iws1	||	15	3	3	||	0.0890278	0	0.0890278	||	2	15	0.133333	|	3	32	0.09375	|	1	25	0.04	||	0	24	0	|	0	21	0	|	0	19	0	||	Differentially Edited	0.0812082
chr5:32811919	chr5	32811919	-	Intron	||	Gm20671;Prr14l	||	4	3	2	||	0.089418	0	0.089418	||	1	9	0.111111	|	3	28	0.107143	|	1	20	0.05	||	0	4	0	|	0	16	0	|	0	7	0	||	Differentially Edited	0.0454491
chr11:75699325	chr11	75699325	+	Intron	||	Crk	||	11	3	3	||	0.089682	0	0.089682	||	2	15	0.133333	|	5	83	0.060241	|	4	53	0.0754717	||	0	11	0	|	0	36	0	|	0	29	0	||	Differentially Edited	0.056462
chr7:113531266	chr7	113531266	+	Intron	||	Far1;Far1os	||	11	3	3	||	0.0897619	0	0.0897619	||	2	25	0.08	|	5	56	0.0892857	|	3	30	0.1	||	0	11	0	|	0	19	0	|	0	18	0	||	Differentially Edited	0.00411854
chr5:143044658	chr5	143044658	-	Intron	||	Rnf216	||	4	3	2	||	0.0900794	0	0.0900794	||	1	8	0.125	|	2	21	0.0952381	|	1	20	0.05	||	0	4	0	|	0	20	0	|	0	12	0	||	Differentially Edited	0.0538956
chr11:23345670	chr11	23345670	+	Intron	||	Usp34	||	7	3	3	||	0.0901915	0	0.0901915	||	1	7	0.142857	|	3	46	0.0652174	|	2	32	0.0625	||	0	16	0	|	0	32	0	|	0	14	0	||	Differentially Edited	0.0757521
chr4:154918502	chr4	154918502	-	intergenic	||	NA	||	129	3	3	||	0.0905963	0	0.0905963	||	13	129	0.100775	|	48	515	0.0932039	|	27	347	0.0778098	||	0	157	0	|	0	287	0	|	0	638	0	||	Differentially Edited	0.00551596
chr12:33328710	chr12	33328710	+	Exon	||	Atxn7l1	||	14	3	3	||	0.0907058	0	0.0907058	||	3	27	0.111111	|	5	53	0.0943396	|	2	30	0.0666667	||	0	14	0	|	0	41	0	|	0	52	0	||	Differentially Edited	0.0198041
chr17:25929508	chr17	25929508	-	Intron	||	Gm16278;Gm26694;Pigq	||	55	3	3	||	0.0962963	0.00529101	0.0910053	||	7	55	0.127273	|	7	99	0.0707071	|	6	66	0.0909091	||	0	64	0	|	0	58	0	|	2	126	0.015873	||	Differentially Edited	0.023027
chr6:66540271	chr6	66540271	+	UTR	||	Mad2l1	||	29	3	3	||	0.0910494	0	0.0910494	||	10	73	0.136986	|	6	85	0.0705882	|	4	61	0.0655738	||	0	57	0	|	0	29	0	|	0	62	0	||	Differentially Edited	0.0583533
chr3:100470476	chr3	100470476	-	UTR	||	Fam46c	||	456	3	3	||	0.0910606	0	0.0910606	||	24	456	0.0526316	|	149	1236	0.12055	|	113	1130	0.1	||	0	751	0	|	0	2461	0	|	0	2127	0	||	Differentially Edited	0.0454681
chr9:120122682	chr9	120122682	+	Intron	||	Slc25a38	||	12	3	3	||	0.107143	0.015873	0.0912698	||	1	14	0.0714286	|	1	12	0.0833333	|	2	12	0.166667	||	1	21	0.047619	|	0	16	0	|	0	14	0	||	Differentially Edited	0.0732151
chr1:156427611	chr1	156427611	-	UTR	||	Soat1	||	7	3	3	||	0.0913043	0	0.0913043	||	1	10	0.1	|	2	23	0.0869565	|	2	23	0.0869565	||	0	7	0	|	0	21	0	|	0	26	0	||	Differentially Edited	0.00225989
chr4:108230620	chr4	108230620	-	UTR	||	Zyg11b	||	13	3	3	||	0.0914549	0	0.0914549	||	2	37	0.0540541	|	7	53	0.132075	|	3	34	0.0882353	||	0	13	0	|	0	58	0	|	0	26	0	||	Differentially Edited	0.0558977
chr8:72482552	chr8	72482552	-	UTR	||	Slc35e1	||	25	3	3	||	0.0914628	0	0.0914628	||	3	26	0.115385	|	2	36	0.0555556	|	6	58	0.103448	||	0	25	0	|	0	40	0	|	0	56	0	||	Differentially Edited	0.0377057
chr11:86314553	chr11	86314553	-	Intron	||	Med13	||	12	3	3	||	0.0918301	0	0.0918301	||	1	12	0.0833333	|	3	51	0.0588235	|	4	30	0.133333	||	0	18	0	|	0	58	0	|	0	57	0	||	Differentially Edited	0.05255
chr13:64290180	chr13	64290180	-	intergenic	||	Aaed1	||	42	3	3	||	0.0918543	0	0.0918543	||	3	42	0.0714286	|	7	63	0.111111	|	4	43	0.0930233	||	0	52	0	|	0	94	0	|	0	44	0	||	Differentially Edited	0.0152381
chr2:120600838	chr2	120600838	+	UTR	||	Snap23	||	12	3	3	||	0.0918803	0	0.0918803	||	1	12	0.0833333	|	3	39	0.0769231	|	3	26	0.115385	||	0	24	0	|	0	64	0	|	0	33	0	||	Differentially Edited	0.0163556
chr2:31026924	chr2	31026924	-	UTR	||	Fnbp1	||	7	3	3	||	0.0921569	0	0.0921569	||	2	17	0.117647	|	2	34	0.0588235	|	4	40	0.1	||	0	7	0	|	0	32	0	|	0	37	0	||	Differentially Edited	0.0339519
chr19:7326698	chr19	7326698	-	Intron	||	Mark2	||	11	3	3	||	0.0923141	0	0.0923141	||	1	19	0.0526316	|	4	38	0.105263	|	5	42	0.119048	||	0	11	0	|	0	21	0	|	0	22	0	||	Differentially Edited	0.0448461
chr2:119105589	chr2	119105589	+	intergenic	||	NA	||	42	3	3	||	0.0923311	0	0.0923311	||	5	42	0.119048	|	3	72	0.0416667	|	5	43	0.116279	||	0	46	0	|	0	42	0	|	0	66	0	||	Differentially Edited	0.0677788
chr5:29771797	chr5	29771797	+	Intron	||	Dnajb6	||	7	3	3	||	0.0924148	0	0.0924148	||	1	7	0.142857	|	2	22	0.0909091	|	1	23	0.0434783	||	0	11	0	|	0	26	0	|	0	21	0	||	Differentially Edited	0.0844029
chr17:33702711	chr17	33702711	-	Intron	||	2002-03-01	||	3	3	2	||	0.0925926	0	0.0925926	||	1	9	0.111111	|	1	30	0.0333333	|	2	15	0.133333	||	0	3	0	|	0	15	0	|	0	44	0	||	Differentially Edited	0.0925575
chr5:118608278	chr5	118608278	+	Intron	||	Med13l	||	16	3	3	||	0.0928105	0	0.0928105	||	2	16	0.125	|	4	51	0.0784314	|	3	40	0.075	||	0	18	0	|	0	39	0	|	0	61	0	||	Differentially Edited	0.0288853
chr2:5021084	chr2	5021084	-	UTR	||	Optn	||	49	3	3	||	0.0930159	0	0.0930159	||	3	50	0.06	|	10	84	0.119048	|	8	80	0.1	||	0	49	0	|	0	62	0	|	0	125	0	||	Differentially Edited	0.033256
chr7:81034369	chr7	81034369	+	Intron	||	Zfp592	||	3	3	2	||	0.0931965	0	0.0931965	||	1	8	0.125	|	1	23	0.0434783	|	1	9	0.111111	||	0	3	0	|	0	9	0	|	0	13	0	||	Differentially Edited	0.0658694
chr2:132575206	chr2	132575206	-	Intron	||	Gpcpd1	||	9	3	3	||	0.0935757	0	0.0935757	||	1	9	0.111111	|	5	83	0.060241	|	7	64	0.109375	||	0	16	0	|	0	71	0	|	0	71	0	||	Differentially Edited	0.0303175
chr13:67473048	chr13	67473048	-	UTR	||	AC154510.1;Zfp874b	||	9	3	3	||	0.093985	0	0.093985	||	2	19	0.105263	|	1	14	0.0714286	|	2	19	0.105263	||	0	16	0	|	0	13	0	|	0	9	0	||	Differentially Edited	0.0140962
chr11:77534495	chr11	77534495	-	UTR	||	Abhd15;Taok1	||	37	3	3	||	0.0943736	0	0.0943736	||	3	37	0.0810811	|	7	71	0.0985915	|	9	87	0.103448	||	0	72	0	|	0	71	0	|	0	66	0	||	Differentially Edited	0.00514049
chr4:155621487	chr4	155621487	+	UTR	||	Gm10563;Gm16023;Slc35e2	||	13	3	3	||	0.0946886	0	0.0946886	||	1	13	0.0769231	|	2	20	0.1	|	3	28	0.107143	||	0	22	0	|	0	35	0	|	0	32	0	||	Differentially Edited	0.00914754
chr2:144540438	chr2	144540438	+	UTR	||	Polr3f	||	18	3	3	||	0.0947712	0	0.0947712	||	1	18	0.0555556	|	5	45	0.111111	|	4	34	0.117647	||	0	39	0	|	0	51	0	|	0	27	0	||	Differentially Edited	0.0405903
chr19:21680557	chr19	21680557	+	Intron	||	Abhd17b	||	7	3	3	||	0.0949582	0	0.0949582	||	3	24	0.125	|	2	29	0.0689655	|	1	11	0.0909091	||	0	7	0	|	0	7	0	|	0	11	0	||	Differentially Edited	0.0282303
chr11:3319531	chr11	3319531	+	Intron	||	Gm11944;Gm12592	||	2	3	2	||	0.0951178	0	0.0951178	||	1	12	0.0833333	|	1	9	0.111111	|	2	22	0.0909091	||	0	2	0	|	0	13	0	|	0	9	0	||	Differentially Edited	0.00751104
chr2:18214657	chr2	18214657	-	UTR	||	Dnajc1	||	12	3	3	||	0.0955609	0	0.0955609	||	3	19	0.157895	|	1	22	0.0454545	|	1	12	0.0833333	||	0	13	0	|	0	16	0	|	0	15	0	||	Differentially Edited	0.101586
chr4:108233293	chr4	108233293	-	UTR	||	Zyg11b	||	29	3	3	||	0.0956156	0	0.0956156	||	3	30	0.1	|	5	56	0.0892857	|	4	41	0.097561	||	0	33	0	|	0	68	0	|	0	29	0	||	Differentially Edited	0.00114789
chr2:120602237	chr2	120602237	+	intergenic	||	NA	||	15	3	3	||	0.0956522	0	0.0956522	||	1	15	0.0666667	|	4	30	0.133333	|	2	23	0.0869565	||	0	20	0	|	0	33	0	|	0	30	0	||	Differentially Edited	0.0400106
chr9:22241220	chr9	22241220	+	Intron	||	Zfp809	||	4	3	2	||	0.0957265	0	0.0957265	||	2	13	0.153846	|	2	30	0.0666667	|	1	15	0.0666667	||	0	7	0	|	0	4	0	|	0	8	0	||	Differentially Edited	0.0811025
chr9:96056077	chr9	96056077	+	UTR	||	Xrn1	||	8	3	3	||	0.0961538	0	0.0961538	||	1	8	0.125	|	1	26	0.0384615	|	4	32	0.125	||	0	12	0	|	0	26	0	|	0	23	0	||	Differentially Edited	0.0794254
chr4:116538323	chr4	116538323	+	intergenic	||	NA	||	15	3	3	||	0.0961988	0	0.0961988	||	2	19	0.105263	|	1	20	0.05	|	2	15	0.133333	||	0	21	0	|	0	22	0	|	0	39	0	||	Differentially Edited	0.059074
chr2:18214656	chr2	18214656	-	UTR	||	Dnajc1	||	12	3	3	||	0.0962824	0	0.0962824	||	3	19	0.157895	|	1	21	0.047619	|	1	12	0.0833333	||	0	12	0	|	0	18	0	|	0	15	0	||	Differentially Edited	0.0974775
chr8:72531468	chr8	72531468	-	Intron	||	Med26	||	2	3	2	||	0.0966862	0	0.0966862	||	1	10	0.1	|	3	38	0.0789474	|	2	18	0.111111	||	0	2	0	|	0	9	0	|	0	26	0	||	Differentially Edited	0.00938194
chr2:119106918	chr2	119106918	+	intergenic	||	NA	||	5	3	3	||	0.0967773	0	0.0967773	||	2	14	0.142857	|	2	55	0.0363636	|	1	9	0.111111	||	0	5	0	|	0	10	0	|	0	40	0	||	Differentially Edited	0.091952
chr6:66540224	chr6	66540224	+	UTR	||	Mad2l1	||	19	3	3	||	0.0968069	0	0.0968069	||	7	64	0.109375	|	11	90	0.122222	|	3	51	0.0588235	||	0	52	0	|	0	19	0	|	0	59	0	||	Differentially Edited	0.0377092
chr2:90907175	chr2	90907175	+	Intron	||	Kbtbd4	||	7	3	3	||	0.0970696	0	0.0970696	||	1	14	0.0714286	|	1	13	0.0769231	|	1	7	0.142857	||	0	7	0	|	0	9	0	|	0	9	0	||	Differentially Edited	0.0516036
chr18:56956928	chr18	56956928	-	UTR	||	C330018D20Rik	||	14	3	3	||	0.0972222	0	0.0972222	||	1	18	0.0555556	|	4	32	0.125	|	3	27	0.111111	||	0	15	0	|	0	14	0	|	0	21	0	||	Differentially Edited	0.0444669
chr9:22241289	chr9	22241289	+	Intron	||	Zfp809	||	2	3	2	||	0.0975299	0	0.0975299	||	1	11	0.0909091	|	1	17	0.0588235	|	2	14	0.142857	||	0	5	0	|	0	9	0	|	0	2	0	||	Differentially Edited	0.0576245
chr2:119106669	chr2	119106669	+	intergenic	||	NA	||	14	3	3	||	0.0980952	0	0.0980952	||	2	14	0.142857	|	6	75	0.08	|	2	28	0.0714286	||	0	21	0	|	0	35	0	|	0	61	0	||	Differentially Edited	0.0488615
chr8:33779696	chr8	33779696	+	intergenic	||	NA	||	6	3	3	||	0.0987554	0	0.0987554	||	1	7	0.142857	|	1	16	0.0625	|	1	11	0.0909091	||	0	6	0	|	0	14	0	|	0	14	0	||	Differentially Edited	0.052338
chr17:25929249	chr17	25929249	-	Intron	||	Gm16278;Gm26694;Pigq	||	28	3	3	||	0.0988772	0	0.0988772	||	5	34	0.147059	|	2	52	0.0384615	|	5	45	0.111111	||	0	37	0	|	0	28	0	|	0	55	0	||	Differentially Edited	0.0904204
chr5:110400416	chr5	110400416	-	Intron	||	Fbrsl1	||	6	3	3	||	0.0990861	0	0.0990861	||	1	9	0.111111	|	2	21	0.0952381	|	1	11	0.0909091	||	0	7	0	|	0	14	0	|	0	6	0	||	Differentially Edited	0.00381909
chr2:119610083	chr2	119610083	-	UTR	||	Oip5	||	59	3	3	||	0.10236	0.00323625	0.0991241	||	10	59	0.169492	|	4	79	0.0506329	|	6	69	0.0869565	||	0	85	0	|	1	103	0.00970874	|	0	118	0	||	Differentially Edited	0.104965
chr18:32102523	chr18	32102523	+	UTR	||	Iws1	||	17	3	3	||	0.0993993	0	0.0993993	||	2	19	0.105263	|	3	48	0.0625	|	3	23	0.130435	||	0	17	0	|	0	52	0	|	0	42	0	||	Differentially Edited	0.0375675
chr3:95183582	chr3	95183582	-	UTR	||	Gabpb2	||	66	3	3	||	0.108297	0.00849257	0.0998047	||	10	66	0.151515	|	9	140	0.0642857	|	12	110	0.109091	||	0	74	0	|	0	112	0	|	4	157	0.0254777	||	Differentially Edited	0.0464297
chr11:121291584	chr11	121291584	+	Intron	||	Foxk2	||	10	3	3	||	0.100198	0	0.100198	||	1	14	0.0714286	|	1	16	0.0625	|	4	24	0.166667	||	0	10	0	|	0	27	0	|	0	27	0	||	Differentially Edited	0.0951434
chr11:77534420	chr11	77534420	-	UTR	||	Abhd15;Taok1	||	34	3	3	||	0.100212	0	0.100212	||	3	34	0.0882353	|	6	46	0.130435	|	5	61	0.0819672	||	0	39	0	|	0	46	0	|	0	41	0	||	Differentially Edited	0.0222956
chr4:155621141	chr4	155621141	+	UTR	||	Gm10563;Gm16023;Slc35e2	||	20	3	3	||	0.100219	0	0.100219	||	4	33	0.121212	|	4	47	0.0851064	|	5	53	0.0943396	||	0	20	0	|	0	43	0	|	0	57	0	||	Differentially Edited	0.0114759
chr17:46775081	chr17	46775081	-	UTR	||	Gm26904;Rpl7l1	||	53	3	3	||	0.100405	0	0.100405	||	14	92	0.152174	|	7	103	0.0679612	|	6	74	0.0810811	||	0	76	0	|	0	53	0	|	0	68	0	||	Differentially Edited	0.0616696
chr8:110859539	chr8	110859539	+	Intron	||	Cog4	||	11	3	3	||	0.130952	0.030303	0.100649	||	2	14	0.142857	|	2	16	0.125	|	2	16	0.125	||	1	11	0.0909091	|	0	25	0	|	0	12	0	||	Differentially Edited	0.0748197
chr6:57810678	chr6	57810678	-	Intron	||	Vopp1	||	14	3	3	||	0.101135	0	0.101135	||	3	20	0.15	|	2	31	0.0645161	|	4	45	0.0888889	||	0	14	0	|	0	21	0	|	0	71	0	||	Differentially Edited	0.0577788
chr14:47319979	chr14	47319979	+	UTR	||	Mapk1ip1l	||	13	3	3	||	0.10114	0	0.10114	||	2	13	0.153846	|	1	26	0.0384615	|	3	27	0.111111	||	0	19	0	|	0	29	0	|	0	37	0	||	Differentially Edited	0.0953028
chr4:132015975	chr4	132015975	-	Intron	||	Epb41	||	5	3	3	||	0.101191	0	0.101191	||	1	11	0.0909091	|	2	31	0.0645161	|	4	27	0.148148	||	0	5	0	|	0	30	0	|	0	47	0	||	Differentially Edited	0.0546692
chr2:119105622	chr2	119105622	+	intergenic	||	NA	||	34	3	3	||	0.101981	0	0.101981	||	5	34	0.147059	|	6	70	0.0857143	|	3	41	0.0731707	||	0	37	0	|	0	40	0	|	0	70	0	||	Differentially Edited	0.046629
chr1:171701976	chr1	171701976	+	Intron	||	Cd48	||	11	3	3	||	0.102293	0	0.102293	||	4	27	0.148148	|	1	21	0.047619	|	2	18	0.111111	||	0	11	0	|	0	18	0	|	0	11	0	||	Differentially Edited	0.0733926
chr4:129715375	chr4	129715375	-	UTR	||	Khdrbs1	||	28	3	3	||	0.103054	0	0.103054	||	3	28	0.107143	|	5	45	0.111111	|	5	55	0.0909091	||	0	35	0	|	0	51	0	|	0	59	0	||	Differentially Edited	0.00357661
chr10:87931707	chr10	87931707	+	UTR	||	Igf1	||	33	3	3	||	0.10308	0	0.10308	||	5	61	0.0819672	|	2	33	0.0606061	|	6	36	0.166667	||	0	51	0	|	0	46	0	|	0	34	0	||	Differentially Edited	0.0861462
chr16:20544443	chr16	20544443	+	UTR	||	Ap2m1	||	11	3	3	||	0.103563	0	0.103563	||	2	14	0.142857	|	1	13	0.0769231	|	1	11	0.0909091	||	0	14	0	|	0	11	0	|	0	27	0	||	Differentially Edited	0.0355233
chr8:72482340	chr8	72482340	-	UTR	||	Slc35e1	||	42	3	3	||	0.120298	0.015873	0.104425	||	12	63	0.190476	|	8	95	0.0842105	|	10	116	0.0862069	||	2	42	0.047619	|	0	67	0	|	0	126	0	||	Differentially Edited	0.0792633
chr4:155621048	chr4	155621048	+	UTR	||	Gm10563;Gm16023;Slc35e2	||	20	3	3	||	0.10491	0	0.10491	||	3	26	0.115385	|	3	34	0.0882353	|	4	36	0.111111	||	0	20	0	|	0	50	0	|	0	61	0	||	Differentially Edited	0.00639239
chr2:119107921	chr2	119107921	+	intergenic	||	NA	||	22	3	3	||	0.105627	0	0.105627	||	1	27	0.037037	|	10	73	0.136986	|	5	35	0.142857	||	0	22	0	|	0	31	0	|	0	50	0	||	Differentially Edited	0.0914154
chr3:122856294	chr3	122856294	+	UTR	||	Pde5a	||	4	3	2	||	0.1057	0	0.1057	||	2	14	0.142857	|	1	11	0.0909091	|	2	24	0.0833333	||	0	4	0	|	0	10	0	|	0	5	0	||	Differentially Edited	0.0299236
chr11:98181696	chr11	98181696	-	Intron	||	Med1	||	10	3	3	||	0.10605	0	0.10605	||	3	19	0.157895	|	2	24	0.0833333	|	1	13	0.0769231	||	0	10	0	|	0	31	0	|	0	12	0	||	Differentially Edited	0.0551325
chr9:120122685	chr9	120122685	+	Intron	||	Slc25a38	||	10	3	3	||	0.122222	0.015873	0.106349	||	1	12	0.0833333	|	1	12	0.0833333	|	2	10	0.2	||	1	21	0.047619	|	0	14	0	|	0	15	0	||	Differentially Edited	0.096402
chr7:118489455	chr7	118489455	-	UTR	||	Itpripl2	||	12	3	3	||	0.106421	0	0.106421	||	2	12	0.166667	|	3	28	0.107143	|	1	22	0.0454545	||	0	40	0	|	0	22	0	|	0	32	0	||	Differentially Edited	0.0932429
chr4:59193288	chr4	59193288	+	Intron	||	Ugcg	||	4	3	2	||	0.142063	0.0350877	0.106976	||	2	14	0.142857	|	2	15	0.133333	|	3	20	0.15	||	0	4	0	|	2	19	0.105263	|	0	17	0	||	Differentially Edited	0.0901808
chr9:3374461	chr9	3374461	+	Intron	||	Alkbh8	||	3	3	2	||	0.108557	0	0.108557	||	3	18	0.166667	|	3	29	0.103448	|	1	18	0.0555556	||	0	3	0	|	0	11	0	|	0	15	0	||	Differentially Edited	0.0777471
chr8:111953489	chr8	111953489	+	UTR	||	Gabarapl2	||	8	3	3	||	0.108894	0	0.108894	||	1	8	0.125	|	1	17	0.0588235	|	2	14	0.142857	||	0	22	0	|	0	25	0	|	0	41	0	||	Differentially Edited	0.0509246
chr3:103334226	chr3	103334226	+	Exon	||	Gm43061;Trim33	||	4	3	2	||	0.109007	0	0.109007	||	1	9	0.111111	|	2	22	0.0909091	|	2	16	0.125	||	0	7	0	|	0	4	0	|	0	8	0	||	Differentially Edited	0.00814321
chr14:31700661	chr14	31700661	-	UTR	||	Ankrd28	||	55	3	3	||	0.126501	0.017174	0.109327	||	10	56	0.178571	|	10	78	0.128205	|	4	55	0.0727273	||	3	76	0.0394737	|	0	73	0	|	1	83	0.0120482	||	Differentially Edited	0.0555415
chr11:62001547	chr11	62001547	+	Intron	||	Specc1	||	14	3	3	||	0.109432	0	0.109432	||	2	14	0.142857	|	10	112	0.0892857	|	5	52	0.0961538	||	0	18	0	|	0	76	0	|	0	89	0	||	Differentially Edited	0.0228442
chr2:18189529	chr2	18189529	+	Intron	||	Mllt10	||	5	3	3	||	0.129058	0.0196078	0.109451	||	1	7	0.142857	|	1	16	0.0625	|	2	11	0.181818	||	0	5	0	|	1	17	0.0588235	|	0	16	0	||	Differentially Edited	0.0690673
chr11:82963231	chr11	82963231	+	intergenic	||	Slfn5	||	7	3	3	||	0.110294	0	0.110294	||	1	8	0.125	|	5	34	0.147059	|	1	17	0.0588235	||	0	15	0	|	0	28	0	|	0	7	0	||	Differentially Edited	0.0532084
chr3:51458211	chr3	51458211	+	Intron	||	Naa15	||	12	3	3	||	0.110684	0	0.110684	||	1	12	0.0833333	|	4	30	0.133333	|	3	26	0.115385	||	0	24	0	|	0	61	0	|	0	38	0	||	Differentially Edited	0.0170123
chr2:5021270	chr2	5021270	-	UTR	||	Optn	||	51	3	3	||	0.110883	0	0.110883	||	5	78	0.0641026	|	12	83	0.144578	|	15	121	0.123967	||	0	51	0	|	0	66	0	|	0	150	0	||	Differentially Edited	0.0442555
chr11:75176340	chr11	75176340	-	UTR	||	1700016P03Rik;Ovca2	||	10	3	3	||	0.111096	0	0.111096	||	1	13	0.0769231	|	3	25	0.12	|	3	22	0.136364	||	0	16	0	|	0	10	0	|	0	16	0	||	Differentially Edited	0.0245287
chr9:43092205	chr9	43092205	-	Intron	||	Arhgef12	||	7	3	3	||	0.134193	0.0229885	0.111205	||	1	7	0.142857	|	4	41	0.097561	|	6	37	0.162162	||	0	7	0	|	2	29	0.0689655	|	0	81	0	||	Differentially Edited	0.0217323
chrX:150985454	chrX	150985454	-	UTR	||	Gnl3l	||	21	3	3	||	0.111223	0	0.111223	||	1	21	0.047619	|	5	29	0.172414	|	5	44	0.113636	||	0	24	0	|	0	50	0	|	0	48	0	||	Differentially Edited	0.0909308
chr15:81454986	chr15	81454986	+	UTR	||	Xpnpep3	||	9	3	3	||	0.111785	0	0.111785	||	1	11	0.0909091	|	2	15	0.133333	|	2	18	0.111111	||	0	14	0	|	0	9	0	|	0	9	0	||	Differentially Edited	0.0117997
chr2:132309873	chr2	132309873	+	UTR	||	Cds2	||	16	3	3	||	0.112534	0	0.112534	||	4	28	0.142857	|	7	71	0.0985915	|	5	52	0.0961538	||	0	16	0	|	0	41	0	|	0	61	0	||	Differentially Edited	0.0177089
chr17:29654268	chr17	29654268	-	Intron	||	Gm28043;Gm28052	||	27	3	3	||	0.112675	0	0.112675	||	3	37	0.0810811	|	4	36	0.111111	|	7	48	0.145833	||	0	46	0	|	0	27	0	|	0	69	0	||	Differentially Edited	0.0264795
chr16:32300353	chr16	32300353	+	UTR	||	Rnf168	||	65	3	3	||	0.112755	0	0.112755	||	9	72	0.125	|	9	97	0.0927835	|	10	83	0.120482	||	0	74	0	|	0	65	0	|	0	110	0	||	Differentially Edited	0.00788283
chr15:102477554	chr15	102477554	+	Intron	||	Gm26518;Pcbp2	||	7	3	3	||	0.113095	0	0.113095	||	1	7	0.142857	|	3	42	0.0714286	|	2	16	0.125	||	0	12	0	|	0	24	0	|	0	15	0	||	Differentially Edited	0.0341757
chr11:75300577	chr11	75300577	-	UTR	||	Rpa1	||	212	3	3	||	0.13807	0.0248047	0.113266	||	43	250	0.172	|	34	246	0.138211	|	26	250	0.104	||	9	338	0.0266272	|	7	212	0.0330189	|	7	474	0.0147679	||	Differentially Edited	0.0224295
chr4:116552282	chr4	116552282	-	Exon	||	Gm12953;Tmem69	||	15	3	3	||	0.113359	0	0.113359	||	5	31	0.16129	|	6	45	0.133333	|	1	22	0.0454545	||	0	51	0	|	0	39	0	|	0	15	0	||	Differentially Edited	0.0831286
chr15:38491612	chr15	38491612	-	Exon	||	Azin1	||	419	3	3	||	0.114732	0.00133601	0.113396	||	55	419	0.131265	|	41	621	0.0660225	|	114	776	0.146907	||	0	507	0	|	2	499	0.00400802	|	0	981	0	||	Differentially Edited	0.0441859
chr1:87717291	chr1	87717291	+	Intron	||	Inpp5d	||	16	3	3	||	0.114054	0	0.114054	||	2	25	0.08	|	6	37	0.162162	|	2	20	0.1	||	0	16	0	|	0	26	0	|	0	16	0	||	Differentially Edited	0.0439626
chr12:76600966	chr12	76600966	-	Intron	||	Sptb	||	19	3	3	||	0.114185	0	0.114185	||	2	22	0.0909091	|	3	32	0.09375	|	3	19	0.157895	||	0	20	0	|	0	31	0	|	0	45	0	||	Differentially Edited	0.0347832
chr2:104437304	chr2	104437304	-	Intron	||	Hipk3	||	6	3	3	||	0.114286	0	0.114286	||	1	10	0.1	|	1	10	0.1	|	1	7	0.142857	||	0	6	0	|	0	14	0	|	0	10	0	||	Differentially Edited	0.0152681
chr7:143526074	chr7	143526074	-	Intron	||	Nap1l4	||	20	3	3	||	0.114396	0	0.114396	||	5	27	0.185185	|	3	37	0.0810811	|	3	39	0.0769231	||	0	20	0	|	0	49	0	|	0	63	0	||	Differentially Edited	0.0839472
chr11:80179665	chr11	80179665	+	intergenic	||	NA	||	6	3	3	||	0.125	0.010101	0.114899	||	1	8	0.125	|	2	16	0.125	|	2	16	0.125	||	0	6	0	|	0	39	0	|	1	33	0.030303	||	Differentially Edited	0.00764008
chr8:94017313	chr8	94017313	-	intergenic	||	Nudt21	||	10	3	3	||	0.114918	0	0.114918	||	2	13	0.153846	|	4	40	0.1	|	1	11	0.0909091	||	0	10	0	|	0	13	0	|	0	19	0	||	Differentially Edited	0.0279877
chr17:34984660	chr17	34984660	+	Exon	||	Lsm2	||	7	3	3	||	0.114959	0	0.114959	||	1	7	0.142857	|	2	18	0.111111	|	1	11	0.0909091	||	0	8	0	|	0	13	0	|	0	10	0	||	Differentially Edited	0.0168604
chr2:120600837	chr2	120600837	+	UTR	||	Snap23	||	12	3	3	||	0.115299	0	0.115299	||	1	12	0.0833333	|	4	39	0.102564	|	4	25	0.16	||	0	25	0	|	0	66	0	|	0	33	0	||	Differentially Edited	0.037656
chr11:96965977	chr11	96965977	+	Intron	||	Sp2	||	7	3	3	||	0.11572	0	0.11572	||	1	10	0.1	|	5	32	0.15625	|	2	22	0.0909091	||	0	7	0	|	0	13	0	|	0	12	0	||	Differentially Edited	0.0297957
chr16:32300236	chr16	32300236	+	UTR	||	Rnf168	||	47	3	3	||	0.116347	0	0.116347	||	6	52	0.115385	|	7	55	0.127273	|	5	47	0.106383	||	0	85	0	|	0	56	0	|	0	66	0	||	Differentially Edited	0.00269262
chr9:88445968	chr9	88445968	-	Intron	||	Gm20537	||	4	3	2	||	0.116402	0	0.116402	||	1	6	0.166667	|	1	14	0.0714286	|	1	9	0.111111	||	0	4	0	|	0	18	0	|	0	17	0	||	Differentially Edited	0.0519531
chr10:89409790	chr10	89409790	-	UTR	||	Gas2l3	||	7	3	3	||	0.116667	0	0.116667	||	3	20	0.15	|	4	25	0.16	|	1	25	0.04	||	0	7	0	|	0	35	0	|	0	21	0	||	Differentially Edited	0.0935805
chr11:77534417	chr11	77534417	-	UTR	||	Abhd15;Taok1	||	35	3	3	||	0.116777	0	0.116777	||	3	35	0.0857143	|	9	46	0.195652	|	4	58	0.0689655	||	0	40	0	|	0	42	0	|	0	38	0	||	Differentially Edited	0.098891
chr14:73261554	chr14	73261554	-	Intron	||	Rb1	||	5	3	3	||	0.117063	0	0.117063	||	1	8	0.125	|	1	7	0.142857	|	1	12	0.0833333	||	0	5	0	|	0	18	0	|	0	22	0	||	Differentially Edited	0.0219502
chr2:121543637	chr2	121543637	+	UTR	||	Wdr76	||	27	3	3	||	0.117664	0	0.117664	||	5	27	0.185185	|	3	43	0.0697674	|	5	51	0.0980392	||	0	42	0	|	0	39	0	|	0	65	0	||	Differentially Edited	0.0771832
chr15:81004785	chr15	81004785	+	Intron	||	Sgsm3	||	5	3	3	||	0.117705	0	0.117705	||	2	14	0.142857	|	1	13	0.0769231	|	2	15	0.133333	||	0	11	0	|	0	5	0	|	0	18	0	||	Differentially Edited	0.0292236
chr5:150641091	chr5	150641091	-	UTR	||	N4bp2l2	||	50	3	3	||	0.117903	0	0.117903	||	4	59	0.0677966	|	19	106	0.179245	|	8	75	0.106667	||	0	50	0	|	0	70	0	|	0	68	0	||	Differentially Edited	0.0688949
chr11:80120439	chr11	80120439	+	Intron	||	Atad5	||	8	3	3	||	0.117919	0	0.117919	||	1	9	0.111111	|	2	17	0.117647	|	2	16	0.125	||	0	8	0	|	0	18	0	|	0	20	0	||	Differentially Edited	0.0011554
chr17:33688737	chr17	33688737	-	Intron	||	2002-03-01	||	37	3	3	||	0.11827	0	0.11827	||	8	44	0.181818	|	10	137	0.0729927	|	9	90	0.1	||	0	37	0	|	0	127	0	|	0	161	0	||	Differentially Edited	0.0687262
chr16:32299894	chr16	32299894	+	UTR	||	Rnf168	||	36	3	3	||	0.118325	0	0.118325	||	2	36	0.0555556	|	11	69	0.15942	|	7	50	0.14	||	0	60	0	|	0	60	0	|	0	69	0	||	Differentially Edited	0.0655415
chr16:22855766	chr16	22855766	-	Intron	||	Tbccd1	||	17	3	3	||	0.118538	0	0.118538	||	3	17	0.176471	|	3	34	0.0882353	|	3	33	0.0909091	||	0	17	0	|	0	27	0	|	0	43	0	||	Differentially Edited	0.0548818
chr8:111583352	chr8	111583352	+	Intron	||	Znrf1	||	3	3	2	||	0.118892	0	0.118892	||	2	19	0.105263	|	5	59	0.0847458	|	5	30	0.166667	||	0	3	0	|	0	18	0	|	0	8	0	||	Differentially Edited	0.0402783
chr16:16880873	chr16	16880873	+	Intron	||	Top3b	||	15	3	3	||	0.138519	0.0196078	0.118911	||	3	15	0.2	|	4	25	0.16	|	1	18	0.0555556	||	1	17	0.0588235	|	0	17	0	|	0	20	0	||	Differentially Edited	0.0928467
chr8:124893811	chr8	124893811	-	UTR	||	Exoc8	||	22	3	3	||	0.119118	0	0.119118	||	2	23	0.0869565	|	7	39	0.179487	|	2	22	0.0909091	||	0	28	0	|	0	26	0	|	0	25	0	||	Differentially Edited	0.0587
chr11:116122774	chr11	116122774	-	UTR	||	Trim47;Trim65	||	4	3	2	||	0.119658	0	0.119658	||	2	13	0.153846	|	1	26	0.0384615	|	2	12	0.166667	||	0	7	0	|	0	4	0	|	0	7	0	||	Differentially Edited	0.0991148
chr2:71435048	chr2	71435048	+	Intron	||	Hat1	||	5	3	3	||	0.119841	0	0.119841	||	1	7	0.142857	|	2	24	0.0833333	|	2	15	0.133333	||	0	5	0	|	0	10	0	|	0	7	0	||	Differentially Edited	0.0229146
chr2:154537442	chr2	154537442	+	UTR	||	Cbfa2t2	||	11	3	3	||	0.119957	0	0.119957	||	2	11	0.181818	|	3	23	0.130435	|	1	21	0.047619	||	0	20	0	|	0	19	0	|	0	23	0	||	Differentially Edited	0.0918112
chr17:33687299	chr17	33687299	-	UTR	||	2002-03-01	||	70	3	3	||	0.138364	0.0181719	0.120192	||	20	126	0.15873	|	17	197	0.0862944	|	25	147	0.170068	||	1	70	0.0142857	|	7	174	0.0402299	|	0	245	0	||	Differentially Edited	0.0290517
chr11:104538632	chr11	104538632	-	Intron	||	Cdc27	||	10	3	3	||	0.120453	0	0.120453	||	2	14	0.142857	|	2	33	0.0606061	|	3	19	0.157895	||	0	10	0	|	0	21	0	|	0	43	0	||	Differentially Edited	0.0576207
chr17:35857740	chr17	35857740	+	UTR	||	Mdc1	||	21	3	3	||	0.120587	0	0.120587	||	6	34	0.176471	|	2	45	0.0444444	|	10	71	0.140845	||	0	21	0	|	0	30	0	|	0	153	0	||	Differentially Edited	0.0923706
chr7:141393362	chr7	141393362	+	Intron	||	Taldo1	||	8	3	3	||	0.121474	0	0.121474	||	3	16	0.1875	|	2	26	0.0769231	|	2	20	0.1	||	0	9	0	|	0	8	0	|	0	14	0	||	Differentially Edited	0.069004
chr13:55525572	chr13	55525572	-	Intron	||	Dok3	||	7	3	3	||	0.121759	0	0.121759	||	2	18	0.111111	|	5	48	0.104167	|	3	20	0.15	||	0	15	0	|	0	7	0	|	0	12	0	||	Differentially Edited	0.013444
chr13:43449556	chr13	43449556	-	Intron	||	Ranbp9	||	9	3	3	||	0.121922	0	0.121922	||	3	21	0.142857	|	4	38	0.105263	|	2	17	0.117647	||	0	10	0	|	0	9	0	|	0	19	0	||	Differentially Edited	0.00813015
chr14:31701506	chr14	31701506	-	UTR	||	Ankrd28	||	13	3	3	||	0.122002	0	0.122002	||	1	13	0.0769231	|	3	31	0.0967742	|	5	26	0.192308	||	0	41	0	|	0	31	0	|	0	41	0	||	Differentially Edited	0.0756801
chr13:62452113	chr13	62452113	-	intergenic	||	NA	||	7	3	3	||	0.122786	0	0.122786	||	1	12	0.0833333	|	4	23	0.173913	|	1	9	0.111111	||	0	7	0	|	0	21	0	|	0	15	0	||	Differentially Edited	0.0444598
chr2:119107924	chr2	119107924	+	intergenic	||	NA	||	21	3	3	||	0.123505	0	0.123505	||	3	26	0.115385	|	10	71	0.140845	|	4	35	0.114286	||	0	21	0	|	0	32	0	|	0	50	0	||	Differentially Edited	0.00489831
chr4:103131624	chr4	103131624	+	Intron	||	Mier1	||	34	3	3	||	0.174116	0.0500809	0.124035	||	7	34	0.205882	|	11	78	0.141026	|	10	57	0.175439	||	5	47	0.106383	|	5	114	0.0438596	|	0	101	0	||	Differentially Edited	0.0357619
chr2:31030966	chr2	31030966	-	UTR	||	Fnbp1	||	6	3	3	||	0.124691	0	0.124691	||	1	6	0.166667	|	4	30	0.133333	|	2	27	0.0740741	||	0	11	0	|	0	33	0	|	0	16	0	||	Differentially Edited	0.0440594
chr4:155621470	chr4	155621470	+	UTR	||	Gm10563;Gm16023;Slc35e2	||	13	3	3	||	0.124695	0	0.124695	||	2	13	0.153846	|	2	16	0.125	|	2	21	0.0952381	||	0	19	0	|	0	33	0	|	0	30	0	||	Differentially Edited	0.0179175
chr19:7538115	chr19	7538115	+	UTR	||	Atl3	||	107	3	3	||	0.131657	0.00674443	0.124913	||	14	107	0.130841	|	19	183	0.103825	|	21	131	0.160305	||	2	128	0.015625	|	0	179	0	|	1	217	0.00460829	||	Differentially Edited	0.0117131
chr9:21907836	chr9	21907836	-	UTR	||	Rab3d	||	12	3	3	||	0.125332	0	0.125332	||	2	14	0.142857	|	3	31	0.0967742	|	3	22	0.136364	||	0	12	0	|	0	20	0	|	0	51	0	||	Differentially Edited	0.0129473
chr7:142025017	chr7	142025017	-	Intron	||	Mob2	||	10	3	3	||	0.125397	0	0.125397	||	1	10	0.1	|	4	28	0.142857	|	2	15	0.133333	||	0	11	0	|	0	24	0	|	0	40	0	||	Differentially Edited	0.0105656
chr9:58630873	chr9	58630873	+	Intron	||	Nptn	||	6	3	3	||	0.125641	0	0.125641	||	1	6	0.166667	|	2	15	0.133333	|	1	13	0.0769231	||	0	13	0	|	0	21	0	|	0	34	0	||	Differentially Edited	0.0408124
chr3:65958951	chr3	65958951	+	Exon	||	Gm37305	||	9	3	3	||	0.147884	0.0222222	0.125661	||	3	20	0.15	|	2	9	0.222222	|	1	14	0.0714286	||	1	15	0.0666667	|	0	32	0	|	0	22	0	||	Differentially Edited	0.083136
chr18:34617824	chr18	34617824	-	Intron	||	Brd8	||	9	3	3	||	0.153439	0.0277778	0.125661	||	2	9	0.222222	|	4	24	0.166667	|	1	14	0.0714286	||	1	12	0.0833333	|	0	19	0	|	0	16	0	||	Differentially Edited	0.0851591
chr17:36004511	chr17	36004511	-	Intron	||	A930015D03Rik	||	26	3	3	||	0.125704	0	0.125704	||	4	33	0.121212	|	13	125	0.104	|	12	79	0.151899	||	0	26	0	|	0	43	0	|	0	99	0	||	Differentially Edited	0.0121921
chr9:22241227	chr9	22241227	+	Intron	||	Zfp809	||	5	3	3	||	0.125926	0	0.125926	||	1	15	0.0666667	|	6	30	0.2	|	2	18	0.111111	||	0	7	0	|	0	5	0	|	0	8	0	||	Differentially Edited	0.0847508
chrX:150984549	chrX	150984549	-	UTR	||	Gnl3l	||	14	3	3	||	0.126185	0	0.126185	||	2	14	0.142857	|	2	19	0.105263	|	3	23	0.130435	||	0	14	0	|	0	24	0	|	0	19	0	||	Differentially Edited	0.00759293
chr19:45526786	chr19	45526786	+	Intron	||	Btrc	||	18	3	3	||	0.145817	0.0185185	0.127299	||	3	23	0.130435	|	10	57	0.175439	|	5	38	0.131579	||	1	18	0.0555556	|	0	52	0	|	0	55	0	||	Differentially Edited	0.00664012
chr2:119104455	chr2	119104455	+	UTR	||	Knl1	||	63	3	3	||	0.127445	0	0.127445	||	7	64	0.109375	|	17	117	0.145299	|	12	94	0.12766	||	0	63	0	|	0	86	0	|	0	130	0	||	Differentially Edited	0.00655704
chr18:56956957	chr18	56956957	-	UTR	||	C330018D20Rik	||	10	3	3	||	0.127689	0	0.127689	||	2	10	0.2	|	3	23	0.130435	|	1	19	0.0526316	||	0	11	0	|	0	15	0	|	0	21	0	||	Differentially Edited	0.0954691
chr3:116744146	chr3	116744146	-	UTR	||	Agl	||	18	3	3	||	0.142267	0.0144928	0.127775	||	3	18	0.166667	|	5	40	0.125	|	5	37	0.135135	||	1	23	0.0434783	|	0	18	0	|	0	22	0	||	Differentially Edited	0.00282796
chr1:93793220	chr1	93793220	+	Intron	||	Dtymk	||	8	3	3	||	0.127778	0	0.127778	||	1	8	0.125	|	2	16	0.125	|	2	15	0.133333	||	0	8	0	|	0	9	0	|	0	17	0	||	Differentially Edited	0.000472255
chr12:81449224	chr12	81449224	-	Intron	||	Cox16;Gm20498	||	1	3	2	||	0.127778	0	0.127778	||	1	5	0.2	|	1	12	0.0833333	|	2	20	0.1	||	0	6	0	|	0	1	0	|	0	8	0	||	Differentially Edited	0.0725505
chr7:104339279	chr7	104339279	-	UTR	||	Trim12c	||	27	3	3	||	0.128518	0	0.128518	||	9	49	0.183673	|	11	76	0.144737	|	2	35	0.0571429	||	0	27	0	|	0	29	0	|	0	48	0	||	Differentially Edited	0.0753084
chr3:104828309	chr3	104828309	-	Intron	||	Capza1	||	5	3	3	||	0.143056	0.0138889	0.129167	||	1	5	0.2	|	2	32	0.0625	|	2	12	0.166667	||	0	5	0	|	1	24	0.0416667	|	0	25	0	||	Differentially Edited	0.0768497
chr12:17429859	chr12	17429859	+	UTR	||	Nol10	||	18	3	3	||	0.129389	0	0.129389	||	2	18	0.111111	|	6	33	0.181818	|	2	21	0.0952381	||	0	37	0	|	0	20	0	|	0	24	0	||	Differentially Edited	0.0397939
chr7:139560603	chr7	139560603	+	Intron	||	Inpp5a	||	6	3	3	||	0.129532	0	0.129532	||	2	10	0.2	|	2	19	0.105263	|	2	24	0.0833333	||	0	7	0	|	0	6	0	|	0	9	0	||	Differentially Edited	0.0686101
chr14:86911645	chr14	86911645	-	Intron	||	Diaph3	||	7	3	3	||	0.129693	0	0.129693	||	1	12	0.0833333	|	4	30	0.133333	|	5	29	0.172414	||	0	7	0	|	0	19	0	|	0	38	0	||	Differentially Edited	0.0373135
chr19:46172002	chr19	46172002	+	Intron	||	Gbf1	||	1	3	2	||	0.129856	0	0.129856	||	1	7	0.142857	|	7	38	0.184211	|	1	16	0.0625	||	0	1	0	|	0	11	0	|	0	14	0	||	Differentially Edited	0.0680727
chr14:31700629	chr14	31700629	-	UTR	||	Ankrd28	||	55	3	3	||	0.155064	0.0251081	0.129956	||	12	55	0.218182	|	11	74	0.148649	|	6	61	0.0983607	||	4	79	0.0506329	|	1	81	0.0123457	|	1	81	0.0123457	||	Differentially Edited	0.0510271
chr2:18189524	chr2	18189524	+	Intron	||	Mllt10	||	4	3	2	||	0.169192	0.0392157	0.129976	||	1	6	0.166667	|	4	16	0.25	|	1	11	0.0909091	||	0	4	0	|	2	17	0.117647	|	0	19	0	||	Differentially Edited	0.0994757
chr5:150640553	chr5	150640553	-	UTR	||	N4bp2l2	||	19	3	3	||	0.129991	0	0.129991	||	4	19	0.210526	|	5	53	0.0943396	|	4	47	0.0851064	||	0	28	0	|	0	56	0	|	0	54	0	||	Differentially Edited	0.084363
chr2:119104918	chr2	119104918	+	UTR	||	Knl1	||	42	3	3	||	0.135106	0.00396825	0.131138	||	7	42	0.166667	|	11	145	0.0758621	|	21	129	0.162791	||	1	84	0.0119048	|	0	116	0	|	0	158	0	||	Differentially Edited	0.045282
chr2:32158521	chr2	32158521	+	Intron	||	Prrc2b	||	6	3	3	||	0.131373	0	0.131373	||	2	17	0.117647	|	2	20	0.1	|	3	17	0.176471	||	0	6	0	|	0	15	0	|	0	16	0	||	Differentially Edited	0.0295968
chr8:124894129	chr8	124894129	-	UTR	||	Exoc8	||	13	3	3	||	0.13155	0	0.13155	||	2	13	0.153846	|	2	23	0.0869565	|	2	13	0.153846	||	0	13	0	|	0	13	0	|	0	27	0	||	Differentially Edited	0.0275459
chr9:58630874	chr9	58630874	+	Intron	||	Nptn	||	6	3	3	||	0.131944	0	0.131944	||	1	6	0.166667	|	1	16	0.0625	|	2	12	0.166667	||	0	14	0	|	0	20	0	|	0	32	0	||	Differentially Edited	0.0627991
chr8:111953495	chr8	111953495	+	UTR	||	Gabarapl2	||	7	3	3	||	0.132275	0	0.132275	||	1	7	0.142857	|	2	18	0.111111	|	2	14	0.142857	||	0	23	0	|	0	26	0	|	0	38	0	||	Differentially Edited	0.00633921
chr4:21834817	chr4	21834817	+	UTR	||	Usp45	||	43	3	3	||	0.13262	0	0.13262	||	6	43	0.139535	|	12	78	0.153846	|	7	67	0.104478	||	0	66	0	|	0	59	0	|	0	121	0	||	Differentially Edited	0.0120079
chr8:72482670	chr8	72482670	-	UTR	||	Slc35e1	||	64	3	3	||	0.13637	0.003663	0.132707	||	6	64	0.09375	|	15	92	0.163043	|	23	151	0.152318	||	0	71	0	|	1	91	0.010989	|	0	134	0	||	Differentially Edited	0.0227268
chr19:5573454	chr19	5573454	+	intergenic	||	NA	||	6	3	3	||	0.133838	0	0.133838	||	2	11	0.181818	|	2	24	0.0833333	|	3	22	0.136364	||	0	6	0	|	0	12	0	|	0	16	0	||	Differentially Edited	0.0423598
chr8:110878525	chr8	110878525	+	Intron	||	Cog4;Gm26816	||	0	3	2	||	0.134259	0	0.134259	||	2	12	0.166667	|	2	18	0.111111	|	2	16	0.125	||	0	0	NA	|	0	17	0	|	0	14	0	||	Differentially Edited	0.0151084
chr6:66540128	chr6	66540128	+	UTR	||	Mad2l1	||	27	3	3	||	0.134289	0	0.134289	||	6	43	0.139535	|	7	84	0.0833333	|	9	50	0.18	||	0	45	0	|	0	27	0	|	0	61	0	||	Differentially Edited	0.0409076
chr13:24814559	chr13	24814559	+	intergenic	||	BC005537	||	7	3	3	||	0.135263	0	0.135263	||	1	7	0.142857	|	2	16	0.125	|	4	29	0.137931	||	0	13	0	|	0	35	0	|	0	42	0	||	Differentially Edited	0.00154609
chr8:72478923	chr8	72478923	-	intergenic	||	NA	||	4	3	2	||	0.136243	0	0.136243	||	1	9	0.111111	|	3	14	0.214286	|	1	12	0.0833333	||	0	4	0	|	0	10	0	|	0	11	0	||	Differentially Edited	0.0758893
chr4:155621897	chr4	155621897	+	UTR	||	Gm10563;Gm16023;Slc35e2	||	26	3	3	||	0.140313	0.00396825	0.136345	||	3	26	0.115385	|	4	48	0.0833333	|	18	81	0.222222	||	0	48	0	|	0	96	0	|	1	84	0.0119048	||	Differentially Edited	0.0818878
chr17:34590933	chr17	34590933	+	Exon	||	Gpsm3	||	5	3	3	||	0.136508	0	0.136508	||	1	5	0.2	|	2	14	0.142857	|	2	30	0.0666667	||	0	6	0	|	0	7	0	|	0	15	0	||	Differentially Edited	0.0715579
chr1:87717284	chr1	87717284	+	Intron	||	Inpp5d	||	14	3	3	||	0.181151	0.0444444	0.136707	||	5	25	0.2	|	7	31	0.225806	|	2	17	0.117647	||	0	14	0	|	0	23	0	|	2	15	0.133333	||	Differentially Edited	0.0738715
chr6:66540711	chr6	66540711	+	UTR	||	Mad2l1	||	105	3	3	||	0.137125	0	0.137125	||	29	192	0.151042	|	35	212	0.165094	|	12	126	0.0952381	||	0	217	0	|	0	105	0	|	0	197	0	||	Differentially Edited	0.0233576
chr3:69120822	chr3	69120822	-	Exon	||	Gm37558;Kpna4	||	13	3	3	||	0.143143	0.00574713	0.137396	||	2	13	0.153846	|	4	47	0.0851064	|	8	42	0.190476	||	0	16	0	|	1	58	0.0172414	|	0	48	0	||	Differentially Edited	0.0429306
chr17:35858620	chr17	35858620	+	UTR	||	Mdc1	||	20	3	3	||	0.137425	0	0.137425	||	5	25	0.2	|	4	56	0.0714286	|	10	71	0.140845	||	0	20	0	|	0	28	0	|	0	77	0	||	Differentially Edited	0.0659484
chr3:30804570	chr3	30804570	+	Intron	||	Sec62	||	10	3	3	||	0.138172	0	0.138172	||	2	10	0.2	|	2	31	0.0645161	|	3	20	0.15	||	0	17	0	|	0	42	0	|	0	41	0	||	Differentially Edited	0.0730836
chr8:78619100	chr8	78619100	+	Intron	||	Slc10a7	||	3	3	2	||	0.138889	0	0.138889	||	1	6	0.166667	|	1	20	0.05	|	4	20	0.2	||	0	10	0	|	0	10	0	|	0	3	0	||	Differentially Edited	0.0925575
chr7:29223098	chr7	29223098	-	UTR	||	Kcnk6	||	10	3	3	||	0.138889	0	0.138889	||	4	24	0.166667	|	2	12	0.166667	|	1	12	0.0833333	||	0	23	0	|	0	18	0	|	0	10	0	||	Differentially Edited	0.0377496
chr12:8750270	chr12	8750270	+	UTR	||	Pum2	||	40	3	3	||	0.142891	0.00383142	0.139059	||	3	40	0.075	|	13	59	0.220339	|	8	60	0.133333	||	0	56	0	|	1	87	0.0114943	|	0	68	0	||	Differentially Edited	0.0799643
chr4:116552796	chr4	116552796	-	UTR	||	Tmem69	||	8	3	3	||	0.139105	0	0.139105	||	3	16	0.1875	|	2	23	0.0869565	|	2	14	0.142857	||	0	19	0	|	0	8	0	|	0	19	0	||	Differentially Edited	0.0410447
chr17:36004687	chr17	36004687	-	Intron	||	A930015D03Rik	||	34	3	3	||	0.139641	0	0.139641	||	7	42	0.166667	|	13	139	0.0935252	|	10	63	0.15873	||	0	34	0	|	0	39	0	|	0	88	0	||	Differentially Edited	0.026447
chr16:33476775	chr16	33476775	+	Intron	||	Zfp148	||	5	3	3	||	0.139927	0	0.139927	||	1	7	0.142857	|	4	20	0.2	|	1	13	0.0769231	||	0	5	0	|	0	13	0	|	0	6	0	||	Differentially Edited	0.0589306
chr2:152236336	chr2	152236336	+	Intron	||	Csnk2a1	||	5	3	3	||	0.14024	0	0.14024	||	1	5	0.2	|	2	37	0.0540541	|	2	12	0.166667	||	0	6	0	|	0	7	0	|	0	7	0	||	Differentially Edited	0.086466
chr2:70734591	chr2	70734591	-	Intron	||	Tlk1	||	8	3	3	||	0.182407	0.0416667	0.140741	||	1	8	0.125	|	5	25	0.2	|	6	27	0.222222	||	1	8	0.125	|	0	24	0	|	0	24	0	||	Differentially Edited	0.0572655
chrX:150983815	chrX	150983815	-	UTR	||	Gnl3l	||	14	3	3	||	0.141093	0	0.141093	||	1	14	0.0714286	|	5	27	0.185185	|	5	30	0.166667	||	0	23	0	|	0	39	0	|	0	38	0	||	Differentially Edited	0.0570927
chr9:21908921	chr9	21908921	-	UTR	||	Rab3d	||	21	3	3	||	0.141125	0	0.141125	||	3	27	0.111111	|	5	47	0.106383	|	7	34	0.205882	||	0	21	0	|	0	31	0	|	0	51	0	||	Differentially Edited	0.0488964
chr11:80179664	chr11	80179664	+	intergenic	||	NA	||	7	3	3	||	0.199561	0.0577201	0.141841	||	1	8	0.125	|	4	19	0.210526	|	5	19	0.263158	||	1	7	0.142857	|	0	38	0	|	1	33	0.030303	||	Differentially Edited	0.075186
chr6:66540213	chr6	66540213	+	UTR	||	Mad2l1	||	21	3	3	||	0.141893	0	0.141893	||	14	64	0.21875	|	11	89	0.123596	|	4	48	0.0833333	||	0	49	0	|	0	21	0	|	0	62	0	||	Differentially Edited	0.071569
chr19:10588638	chr19	10588638	+	intergenic	||	NA	||	38	3	3	||	0.142379	0	0.142379	||	10	61	0.163934	|	8	110	0.0727273	|	16	84	0.190476	||	0	44	0	|	0	38	0	|	0	54	0	||	Differentially Edited	0.0573796
chrX:150985497	chrX	150985497	-	UTR	||	Gnl3l	||	29	3	3	||	0.153009	0.0104167	0.142592	||	4	34	0.117647	|	7	29	0.241379	|	5	50	0.1	||	1	32	0.03125	|	0	48	0	|	0	55	0	||	Differentially Edited	0.0780634
chr6:30433074	chr6	30433074	+	Intron	||	Klhdc10	||	5	3	3	||	0.184615	0.0416667	0.142949	||	1	5	0.2	|	2	13	0.153846	|	2	10	0.2	||	1	8	0.125	|	0	14	0	|	0	13	0	||	Differentially Edited	0.0614523
chr6:66540791	chr6	66540791	+	UTR	||	Mad2l1	||	170	3	3	||	0.143379	0	0.143379	||	57	315	0.180952	|	56	331	0.169184	|	16	200	0.08	||	0	288	0	|	0	170	0	|	0	283	0	||	Differentially Edited	0.0460262
chr3:103334234	chr3	103334234	+	Exon	||	Gm43061;Trim33	||	4	3	2	||	0.19127	0.047619	0.143651	||	2	8	0.25	|	4	21	0.190476	|	2	15	0.133333	||	1	7	0.142857	|	0	4	0	|	0	9	0	||	Differentially Edited	0.0764842
chr18:56957057	chr18	56957057	-	UTR	||	C330018D20Rik	||	5	3	3	||	0.143939	0	0.143939	||	2	11	0.181818	|	1	6	0.166667	|	1	12	0.0833333	||	0	5	0	|	0	7	0	|	0	11	0	||	Differentially Edited	0.0423887
chr4:59193291	chr4	59193291	+	Intron	||	Ugcg	||	5	3	3	||	0.160644	0.0166667	0.143978	||	3	14	0.214286	|	2	17	0.117647	|	3	20	0.15	||	0	5	0	|	1	20	0.05	|	0	19	0	||	Differentially Edited	0.0189553
chr2:119107354	chr2	119107354	+	intergenic	||	NA	||	5	3	3	||	0.144444	0	0.144444	||	1	5	0.2	|	3	30	0.1	|	2	15	0.133333	||	0	6	0	|	0	16	0	|	0	36	0	||	Differentially Edited	0.0390123
chr1:10168216	chr1	10168216	-	Intron	||	Arfgef1	||	8	3	3	||	0.144444	0	0.144444	||	2	9	0.222222	|	2	18	0.111111	|	1	10	0.1	||	0	8	0	|	0	27	0	|	0	22	0	||	Differentially Edited	0.0658515
chr11:59458375	chr11	59458375	+	UTR	||	Jmjd4	||	6	3	3	||	0.144682	0	0.144682	||	1	6	0.166667	|	6	34	0.176471	|	1	11	0.0909091	||	0	10	0	|	0	13	0	|	0	8	0	||	Differentially Edited	0.0331876
chr9:65906723	chr9	65906723	+	Intron	||	Trip4	||	6	3	3	||	0.145219	0	0.145219	||	1	6	0.166667	|	3	33	0.0909091	|	13	73	0.178082	||	0	13	0	|	0	65	0	|	0	125	0	||	Differentially Edited	0.0336984
chr6:125138798	chr6	125138798	+	Intron	||	Nop2	||	11	3	3	||	0.145262	0	0.145262	||	2	18	0.111111	|	2	11	0.181818	|	2	14	0.142857	||	0	45	0	|	0	19	0	|	0	23	0	||	Differentially Edited	0.0192427
chr2:126891488	chr2	126891488	-	UTR	||	Sppl2a	||	8	3	3	||	0.145455	0	0.145455	||	1	10	0.1	|	9	45	0.2	|	3	22	0.136364	||	0	9	0	|	0	8	0	|	0	15	0	||	Differentially Edited	0.0380742
chr4:116539343	chr4	116539343	+	intergenic	||	NA	||	6	3	3	||	0.145945	0	0.145945	||	1	8	0.125	|	3	17	0.176471	|	3	22	0.136364	||	0	6	0	|	0	25	0	|	0	17	0	||	Differentially Edited	0.0112495
chr6:66540138	chr6	66540138	+	UTR	||	Mad2l1	||	24	3	3	||	0.146018	0	0.146018	||	5	34	0.147059	|	10	78	0.128205	|	7	43	0.162791	||	0	35	0	|	0	24	0	|	0	52	0	||	Differentially Edited	0.00465513
chr8:94017282	chr8	94017282	-	intergenic	||	Nudt21	||	6	3	3	||	0.146465	0	0.146465	||	1	6	0.166667	|	3	33	0.0909091	|	2	11	0.181818	||	0	8	0	|	0	10	0	|	0	13	0	||	Differentially Edited	0.0349404
chr7:127566799	chr7	127566799	+	UTR	||	Gm28198;Gm42715;Tmem265	||	13	3	3	||	0.169654	0.0227273	0.146926	||	4	18	0.222222	|	8	36	0.222222	|	2	31	0.0645161	||	0	13	0	|	0	33	0	|	3	44	0.0681818	||	Differentially Edited	0.0912948
chr17:46774930	chr17	46774930	-	UTR	||	Gm26904;Rpl7l1	||	34	3	3	||	0.147156	0	0.147156	||	11	83	0.13253	|	5	49	0.102041	|	12	58	0.206897	||	0	64	0	|	0	34	0	|	0	44	0	||	Differentially Edited	0.0419804
chr5:125457508	chr5	125457508	+	UTR	||	Bri3bp	||	14	3	3	||	0.148148	0	0.148148	||	2	14	0.142857	|	3	28	0.107143	|	7	36	0.194444	||	0	15	0	|	0	19	0	|	0	22	0	||	Differentially Edited	0.0280326
chr10:43709304	chr10	43709304	+	intergenic	||	F930017D23Rik	||	6	3	3	||	0.148504	0	0.148504	||	1	6	0.166667	|	2	13	0.153846	|	2	16	0.125	||	0	6	0	|	0	34	0	|	0	27	0	||	Differentially Edited	0.00681343
chr18:56956547	chr18	56956547	-	UTR	||	C330018D20Rik	||	0	3	2	||	0.148517	0	0.148517	||	1	13	0.0769231	|	2	15	0.133333	|	4	17	0.235294	||	0	6	0	|	0	0	NA	|	0	12	0	||	Differentially Edited	0.085123
chr3:95183503	chr3	95183503	-	UTR	||	Gabpb2	||	47	3	3	||	0.149023	0	0.149023	||	11	47	0.234043	|	12	94	0.12766	|	7	82	0.0853659	||	0	77	0	|	0	113	0	|	0	130	0	||	Differentially Edited	0.0779274
chr7:127520489	chr7	127520489	+	Intron	||	Gm42715;Srcap	||	5	3	3	||	0.149098	0	0.149098	||	2	9	0.222222	|	2	26	0.0769231	|	4	27	0.148148	||	0	10	0	|	0	5	0	|	0	18	0	||	Differentially Edited	0.0708432
chr9:120123320	chr9	120123320	+	Intron	||	Slc25a38	||	23	3	3	||	0.149728	0	0.149728	||	7	32	0.21875	|	4	40	0.1	|	3	23	0.130435	||	0	50	0	|	0	29	0	|	0	36	0	||	Differentially Edited	0.0521806
chr8:124894183	chr8	124894183	-	UTR	||	Exoc8	||	14	3	3	||	0.149807	0	0.149807	||	2	14	0.142857	|	6	35	0.171429	|	5	37	0.135135	||	0	21	0	|	0	16	0	|	0	37	0	||	Differentially Edited	0.00538538
chr4:59193300	chr4	59193300	+	Intron	||	Ugcg	||	6	3	3	||	0.221429	0.0714286	0.15	||	3	14	0.214286	|	4	16	0.25	|	4	20	0.2	||	1	6	0.166667	|	1	21	0.047619	|	0	20	0	||	Differentially Edited	0.0835326
chr2:120602265	chr2	120602265	+	intergenic	||	NA	||	9	3	3	||	0.150327	0	0.150327	||	2	9	0.222222	|	3	27	0.111111	|	2	17	0.117647	||	0	14	0	|	0	29	0	|	0	21	0	||	Differentially Edited	0.0528374
chr1:178193426	chr1	178193426	+	Intron	||	Desi2	||	4	3	2	||	0.150327	0	0.150327	||	2	9	0.222222	|	2	17	0.117647	|	1	9	0.111111	||	0	9	0	|	0	4	0	|	0	11	0	||	Differentially Edited	0.0528374
chr14:47319978	chr14	47319978	+	UTR	||	Mapk1ip1l	||	14	3	3	||	0.151557	0	0.151557	||	3	14	0.214286	|	3	26	0.115385	|	3	24	0.125	||	0	20	0	|	0	28	0	|	0	36	0	||	Differentially Edited	0.0405555
chr12:76600996	chr12	76600996	-	Intron	||	Sptb	||	24	3	3	||	0.15177	0	0.15177	||	3	24	0.125	|	6	38	0.157895	|	5	29	0.172414	||	0	29	0	|	0	45	0	|	0	64	0	||	Differentially Edited	0.00843249
chr8:124893812	chr8	124893812	-	UTR	||	Exoc8	||	22	3	3	||	0.152273	0	0.152273	||	5	25	0.2	|	3	40	0.075	|	4	22	0.181818	||	0	25	0	|	0	26	0	|	0	26	0	||	Differentially Edited	0.0597514
chr16:30357517	chr16	30357517	-	Intron	||	Atp13a3	||	15	3	3	||	0.173613	0.020757	0.152856	||	3	15	0.2	|	3	29	0.103448	|	5	23	0.217391	||	0	19	0	|	1	42	0.0238095	|	1	26	0.0384615	||	Differentially Edited	0.0396037
chr4:155622377	chr4	155622377	+	UTR	||	Gm10563;Gm16023;Slc35e2	||	14	3	3	||	0.153061	0	0.153061	||	1	14	0.0714286	|	11	49	0.22449	|	8	49	0.163265	||	0	21	0	|	0	36	0	|	0	46	0	||	Differentially Edited	0.0750604
chr8:72478776	chr8	72478776	-	intergenic	||	NA	||	12	3	3	||	0.201128	0.047619	0.153509	||	2	14	0.142857	|	4	19	0.210526	|	3	12	0.25	||	2	14	0.142857	|	0	13	0	|	0	16	0	||	Differentially Edited	0.0636513
chr9:22241233	chr9	22241233	+	Intron	||	Zfp809	||	5	3	3	||	0.153622	0	0.153622	||	2	14	0.142857	|	6	29	0.206897	|	2	18	0.111111	||	0	7	0	|	0	5	0	|	0	8	0	||	Differentially Edited	0.0320189
chr18:32102599	chr18	32102599	+	UTR	||	Iws1	||	22	3	3	||	0.214728	0.0607076	0.15402	||	5	22	0.227273	|	19	66	0.287879	|	4	31	0.129032	||	3	28	0.107143	|	3	58	0.0517241	|	1	43	0.0232558	||	Differentially Edited	0.0594276
chr16:4089444	chr16	4089444	-	Exon	||	Crebbp	||	6	3	3	||	0.155556	0	0.155556	||	1	10	0.1	|	2	12	0.166667	|	2	10	0.2	||	0	6	0	|	0	10	0	|	0	15	0	||	Differentially Edited	0.0339082
chr5:65318503	chr5	65318503	-	Intron	||	Rfc1	||	1	3	2	||	0.155952	0	0.155952	||	2	10	0.2	|	3	21	0.142857	|	2	16	0.125	||	0	1	0	|	0	8	0	|	0	21	0	||	Differentially Edited	0.0203947
chr9:120123329	chr9	120123329	+	Intron	||	Slc25a38	||	23	3	3	||	0.156351	0	0.156351	||	5	32	0.15625	|	5	36	0.138889	|	4	23	0.173913	||	0	47	0	|	0	29	0	|	0	37	0	||	Differentially Edited	0.00415577
chr17:24176114	chr17	24176114	-	UTR	||	Gm43796;Tbc1d24	||	5	3	3	||	0.157143	0	0.157143	||	1	5	0.2	|	1	14	0.0714286	|	2	10	0.2	||	0	10	0	|	0	17	0	|	0	28	0	||	Differentially Edited	0.0669922
chr7:113532592	chr7	113532592	+	Intron	||	Far1;Far1os	||	4	2	2	||	0.17775	0.0196078	0.158143	||	1	4	0.25	|	2	29	0.0689655	|	6	28	0.214286	||	0	4	0	|	1	17	0.0588235	|	0	19	0	||	Differentially Edited	0.0906301
chr11:43706402	chr11	43706402	+	UTR	||	Pwwp2a	||	13	3	3	||	0.158263	0	0.158263	||	2	17	0.117647	|	3	30	0.1	|	9	35	0.257143	||	0	19	0	|	0	20	0	|	0	13	0	||	Differentially Edited	0.0860799
chr1:86354467	chr1	86354467	-	Intron	||	Ncl	||	21	3	3	||	0.159144	0	0.159144	||	5	25	0.2	|	2	23	0.0869565	|	4	21	0.190476	||	0	23	0	|	0	43	0	|	0	28	0	||	Differentially Edited	0.048039
chr10:78186353	chr10	78186353	-	intergenic	||	NA	||	7	3	3	||	0.159615	0	0.159615	||	2	13	0.153846	|	2	10	0.2	|	1	8	0.125	||	0	7	0	|	0	18	0	|	0	21	0	||	Differentially Edited	0.0182154
chr2:121492869	chr2	121492869	-	UTR	||	Mfap1a	||	10	3	3	||	0.16029	0	0.16029	||	1	10	0.1	|	6	50	0.12	|	6	23	0.26087	||	0	33	0	|	0	54	0	|	0	39	0	||	Differentially Edited	0.0869253
chr5:125457531	chr5	125457531	+	UTR	||	Bri3bp	||	15	3	3	||	0.160961	0	0.160961	||	2	15	0.133333	|	4	30	0.133333	|	8	37	0.216216	||	0	19	0	|	0	23	0	|	0	21	0	||	Differentially Edited	0.0282198
chr2:119608901	chr2	119608901	-	intergenic	||	NA	||	18	3	3	||	0.161977	0	0.161977	||	3	18	0.166667	|	7	33	0.212121	|	3	28	0.107143	||	0	25	0	|	0	33	0	|	0	36	0	||	Differentially Edited	0.033456
chr13:67473336	chr13	67473336	-	UTR	||	AC154510.1;Zfp874b	||	7	3	3	||	0.162037	0	0.162037	||	4	16	0.25	|	2	18	0.111111	|	2	16	0.125	||	0	7	0	|	0	8	0	|	0	11	0	||	Differentially Edited	0.0669155
chr14:86912101	chr14	86912101	-	Intron	||	Diaph3	||	8	3	3	||	0.203838	0.0416667	0.162172	||	3	10	0.3	|	5	33	0.151515	|	4	25	0.16	||	1	8	0.125	|	0	17	0	|	0	43	0	||	Differentially Edited	0.0647625
chr2:132309884	chr2	132309884	+	UTR	||	Cds2	||	17	3	3	||	0.162262	0	0.162262	||	6	30	0.2	|	13	74	0.175676	|	6	54	0.111111	||	0	17	0	|	0	41	0	|	0	64	0	||	Differentially Edited	0.0256913
chr7:127566679	chr7	127566679	+	UTR	||	Gm28198;Gm42715;Tmem265	||	11	3	3	||	0.192724	0.030303	0.162421	||	3	12	0.25	|	4	19	0.210526	|	2	17	0.117647	||	1	11	0.0909091	|	0	18	0	|	0	17	0	||	Differentially Edited	0.0335107
chr4:116538349	chr4	116538349	+	intergenic	||	NA	||	18	3	3	||	0.162458	0	0.162458	||	1	18	0.0555556	|	5	20	0.25	|	4	22	0.181818	||	0	21	0	|	0	28	0	|	0	41	0	||	Differentially Edited	0.104088
chr9:120123386	chr9	120123386	+	Intron	||	Slc25a38	||	20	3	3	||	0.162686	0	0.162686	||	4	26	0.153846	|	7	38	0.184211	|	3	20	0.15	||	0	43	0	|	0	27	0	|	0	42	0	||	Differentially Edited	0.00439395
chr17:35858605	chr17	35858605	+	UTR	||	Mdc1	||	16	3	3	||	0.16269	0	0.16269	||	3	16	0.1875	|	10	54	0.185185	|	6	52	0.115385	||	0	20	0	|	0	22	0	|	0	64	0	||	Differentially Edited	0.0205052
chr2:121492874	chr2	121492874	-	UTR	||	Mfap1a	||	10	3	3	||	0.162838	0	0.162838	||	2	10	0.2	|	5	51	0.0980392	|	4	21	0.190476	||	0	33	0	|	0	58	0	|	0	38	0	||	Differentially Edited	0.0376366
chr17:25929243	chr17	25929243	-	Intron	||	Gm16278;Gm26694;Pigq	||	27	3	3	||	0.162849	0	0.162849	||	8	33	0.242424	|	4	48	0.0833333	|	7	43	0.162791	||	0	38	0	|	0	27	0	|	0	57	0	||	Differentially Edited	0.0711478
chr2:167506404	chr2	167506404	+	Intron	||	Rnf114	||	1	3	2	||	0.163124	0	0.163124	||	2	13	0.153846	|	3	24	0.125	|	4	19	0.210526	||	0	1	0	|	0	12	0	|	0	14	0	||	Differentially Edited	0.0229048
chr16:22855712	chr16	22855712	-	Intron	||	Tbccd1	||	13	3	3	||	0.163612	0	0.163612	||	1	13	0.0769231	|	4	23	0.173913	|	6	25	0.24	||	0	18	0	|	0	18	0	|	0	28	0	||	Differentially Edited	0.0745342
chr18:20870475	chr18	20870475	-	Intron	||	Trappc8	||	0	2	3	||	0.163978	0	0.163978	||	0	0	NA	|	5	31	0.16129	|	2	12	0.166667	||	0	5	0	|	0	5	0	|	0	9	0	||	Differentially Edited	0.0104355
chr2:5019740	chr2	5019740	-	intergenic	||	NA	||	8	3	3	||	0.164087	0	0.164087	||	3	17	0.176471	|	3	19	0.157895	|	3	19	0.157895	||	0	8	0	|	0	12	0	|	0	26	0	||	Differentially Edited	0.00142096
chr11:75177363	chr11	75177363	-	UTR	||	1700016P03Rik;Ovca2	||	23	3	3	||	0.164184	0	0.164184	||	4	29	0.137931	|	3	32	0.09375	|	6	23	0.26087	||	0	32	0	|	0	29	0	|	0	28	0	||	Differentially Edited	0.0815495
chr14:61418242	chr14	61418242	-	Intron	||	Kpna3	||	2	2	2	||	0.164286	0	0.164286	||	1	4	0.25	|	2	14	0.142857	|	1	10	0.1	||	0	2	0	|	0	9	0	|	0	13	0	||	Differentially Edited	0.0664588
chr5:110660892	chr5	110660892	+	intergenic	||	NA	||	4	2	3	||	0.164918	0	0.164918	||	1	4	0.25	|	2	13	0.153846	|	1	11	0.0909091	||	0	6	0	|	0	19	0	|	0	9	0	||	Differentially Edited	0.0704609
chr2:18215363	chr2	18215363	-	UTR	||	Dnajc1	||	8	3	3	||	0.166304	0	0.166304	||	1	8	0.125	|	4	23	0.173913	|	2	10	0.2	||	0	18	0	|	0	19	0	|	0	12	0	||	Differentially Edited	0.0170269
chr16:22854502	chr16	22854502	-	Intron	||	Tbccd1	||	17	3	3	||	0.166462	0	0.166462	||	3	18	0.166667	|	5	32	0.15625	|	3	17	0.176471	||	0	20	0	|	0	35	0	|	0	36	0	||	Differentially Edited	0.00122774
chr17:36004475	chr17	36004475	-	Intron	||	A930015D03Rik	||	25	3	3	||	0.180271	0.0128205	0.16745	||	6	25	0.24	|	22	123	0.178862	|	10	82	0.121951	||	1	26	0.0384615	|	0	43	0	|	0	95	0	||	Differentially Edited	0.0272083
chr7:102471873	chr7	102471873	+	intergenic	||	NA	||	4	2	3	||	0.167989	0	0.167989	||	1	4	0.25	|	1	9	0.111111	|	1	7	0.142857	||	0	6	0	|	0	10	0	|	0	18	0	||	Differentially Edited	0.0572397
chr15:58127583	chr15	58127583	-	Intron	||	Atad2	||	8	3	3	||	0.16835	0	0.16835	||	5	18	0.277778	|	2	22	0.0909091	|	3	22	0.136364	||	0	8	0	|	0	22	0	|	0	36	0	||	Differentially Edited	0.0959015
chr2:126891537	chr2	126891537	-	UTR	||	Sppl2a	||	5	3	3	||	0.168421	0	0.168421	||	1	5	0.2	|	4	38	0.105263	|	5	25	0.2	||	0	7	0	|	0	11	0	|	0	15	0	||	Differentially Edited	0.0334047
chr2:121543747	chr2	121543747	+	UTR	||	Wdr76	||	30	3	3	||	0.168684	0	0.168684	||	8	30	0.266667	|	11	89	0.123596	|	11	95	0.115789	||	0	43	0	|	0	68	0	|	0	86	0	||	Differentially Edited	0.075128
chr4:116539226	chr4	116539226	+	intergenic	||	NA	||	9	3	3	||	0.168845	0	0.168845	||	1	9	0.111111	|	2	17	0.117647	|	5	18	0.277778	||	0	22	0	|	0	29	0	|	0	16	0	||	Differentially Edited	0.0902948
chr2:4989841	chr2	4989841	-	UTR	||	Mcm10	||	17	3	3	||	0.168915	0	0.168915	||	2	17	0.117647	|	5	28	0.178571	|	4	19	0.210526	||	0	20	0	|	0	30	0	|	0	42	0	||	Differentially Edited	0.0250395
chr8:72480343	chr8	72480343	-	intergenic	||	NA	||	6	3	3	||	0.206553	0.037037	0.169516	||	1	6	0.166667	|	3	13	0.230769	|	2	9	0.222222	||	1	9	0.111111	|	0	20	0	|	0	19	0	||	Differentially Edited	0.0262031
chr4:129309891	chr4	129309891	-	UTR	||	Gm26722;Rbbp4	||	142	3	3	||	0.169833	0	0.169833	||	37	210	0.17619	|	51	295	0.172881	|	30	187	0.160428	||	0	218	0	|	0	142	0	|	0	242	0	||	Differentially Edited	0.000797425
chr1:37442393	chr1	37442393	-	UTR	||	Mgat4a	||	10	3	3	||	0.169841	0	0.169841	||	2	10	0.2	|	3	18	0.166667	|	3	21	0.142857	||	0	12	0	|	0	15	0	|	0	22	0	||	Differentially Edited	0.00938664
chr1:133790475	chr1	133790475	-	Intron	||	Atp2b4	||	10	3	3	||	0.169938	0	0.169938	||	7	25	0.28	|	2	23	0.0869565	|	4	28	0.142857	||	0	10	0	|	0	18	0	|	0	38	0	||	Differentially Edited	0.0975107
chr9:120122622	chr9	120122622	+	Intron	||	Slc25a38	||	17	3	3	||	0.170279	0	0.170279	||	8	34	0.235294	|	2	17	0.117647	|	3	19	0.157895	||	0	35	0	|	0	24	0	|	0	26	0	||	Differentially Edited	0.0387298
chr5:150641110	chr5	150641110	-	UTR	||	N4bp2l2	||	54	3	3	||	0.170649	0	0.170649	||	9	65	0.138462	|	23	120	0.191667	|	16	88	0.181818	||	0	54	0	|	0	80	0	|	0	79	0	||	Differentially Edited	0.00904737
chr4:21834578	chr4	21834578	+	UTR	||	Usp45	||	13	3	3	||	0.171717	0	0.171717	||	2	15	0.133333	|	6	30	0.2	|	4	22	0.181818	||	0	22	0	|	0	13	0	|	0	27	0	||	Differentially Edited	0.0131611
chr7:123129168	chr7	123129168	+	Intron	||	Gm45846;Tnrc6a	||	17	3	3	||	0.171772	0	0.171772	||	3	17	0.176471	|	9	58	0.155172	|	9	49	0.183673	||	0	24	0	|	0	51	0	|	0	41	0	||	Differentially Edited	0.00247207
chr12:84972419	chr12	84972419	+	Intron	||	Fcf1	||	12	3	3	||	0.184343	0.0119048	0.172439	||	3	12	0.25	|	2	12	0.166667	|	3	22	0.136364	||	0	18	0	|	1	28	0.0357143	|	0	25	0	||	Differentially Edited	0.0262605
chr16:32299924	chr16	32299924	+	UTR	||	Rnf168	||	15	3	3	||	0.172549	0	0.172549	||	4	16	0.25	|	3	20	0.15	|	2	17	0.117647	||	0	15	0	|	0	22	0	|	0	30	0	||	Differentially Edited	0.0493844
chr14:61418232	chr14	61418232	-	Intron	||	Kpna3	||	2	2	2	||	0.172619	0	0.172619	||	1	4	0.25	|	2	16	0.125	|	1	7	0.142857	||	0	2	0	|	0	9	0	|	0	12	0	||	Differentially Edited	0.047515
chr6:113713185	chr6	113713185	+	intergenic	||	NA	||	5	3	3	||	0.172619	0	0.172619	||	2	8	0.25	|	1	8	0.125	|	1	7	0.142857	||	0	5	0	|	0	19	0	|	0	16	0	||	Differentially Edited	0.047515
chr11:121291595	chr11	121291595	+	Intron	||	Foxk2	||	10	3	3	||	0.17328	0	0.17328	||	4	18	0.222222	|	3	14	0.214286	|	2	24	0.0833333	||	0	10	0	|	0	21	0	|	0	27	0	||	Differentially Edited	0.061384
chr11:59458360	chr11	59458360	+	UTR	||	Jmjd4	||	6	3	3	||	0.174174	0	0.174174	||	1	6	0.166667	|	7	37	0.189189	|	2	12	0.166667	||	0	9	0	|	0	13	0	|	0	8	0	||	Differentially Edited	0.00185275
chr16:32299839	chr16	32299839	+	UTR	||	Rnf168	||	45	3	3	||	0.174527	0	0.174527	||	7	45	0.155556	|	14	102	0.137255	|	15	65	0.230769	||	0	93	0	|	0	87	0	|	0	112	0	||	Differentially Edited	0.0258416
chr10:128800572	chr10	128800572	+	UTR	||	AC131081.1;Mmp19;Tmem198b	||	6	3	3	||	0.211603	0.037037	0.174566	||	2	9	0.222222	|	2	11	0.181818	|	3	13	0.230769	||	0	20	0	|	0	6	0	|	1	9	0.111111	||	Differentially Edited	0.028651
chr16:64762269	chr16	64762269	-	UTR	||	4930453N24Rik	||	19	3	3	||	0.174791	0	0.174791	||	4	19	0.210526	|	4	25	0.16	|	4	26	0.153846	||	0	24	0	|	0	33	0	|	0	34	0	||	Differentially Edited	0.0103888
chr2:120620269	chr2	120620269	+	UTR	||	Haus2	||	17	3	3	||	0.175257	0	0.175257	||	2	20	0.1	|	4	17	0.235294	|	4	21	0.190476	||	0	20	0	|	0	33	0	|	0	30	0	||	Differentially Edited	0.0478761
chr14:57584891	chr14	57584891	-	Intron	||	Xpo4	||	7	3	3	||	0.17619	0	0.17619	||	2	7	0.285714	|	2	14	0.142857	|	1	10	0.1	||	0	11	0	|	0	18	0	|	0	7	0	||	Differentially Edited	0.0882938
chr1:143755364	chr1	143755364	-	UTR	||	Trove2	||	5	3	3	||	0.204419	0.0277778	0.176641	||	2	7	0.285714	|	3	31	0.0967742	|	3	13	0.230769	||	1	12	0.0833333	|	0	14	0	|	0	5	0	||	Differentially Edited	0.0686615
chr10:128117589	chr10	128117589	+	Intron	||	Baz2a	||	7	3	3	||	0.177778	0	0.177778	||	2	10	0.2	|	5	20	0.25	|	1	12	0.0833333	||	0	7	0	|	0	13	0	|	0	26	0	||	Differentially Edited	0.0692324
chr13:67473370	chr13	67473370	-	UTR	||	AC154510.1;Zfp874b	||	4	3	2	||	0.177945	0	0.177945	||	2	14	0.142857	|	2	19	0.105263	|	4	14	0.285714	||	0	4	0	|	0	7	0	|	0	10	0	||	Differentially Edited	0.083623
chr11:121291582	chr11	121291582	+	Intron	||	Foxk2	||	10	3	3	||	0.178346	0	0.178346	||	2	17	0.117647	|	3	15	0.2	|	5	23	0.217391	||	0	10	0	|	0	25	0	|	0	29	0	||	Differentially Edited	0.0284859
chr2:5021276	chr2	5021276	-	UTR	||	Optn	||	53	3	3	||	0.178707	0	0.178707	||	5	82	0.0609756	|	22	83	0.26506	|	25	119	0.210084	||	0	53	0	|	0	69	0	|	0	163	0	||	Differentially Edited	0.099347
chr3:103334236	chr3	103334236	+	Exon	||	Gm43061;Trim33	||	4	3	2	||	0.226956	0.047619	0.179337	||	1	7	0.142857	|	6	19	0.315789	|	4	18	0.222222	||	1	7	0.142857	|	0	4	0	|	0	8	0	||	Differentially Edited	0.0603201
chr3:96625806	chr3	96625806	+	UTR	||	6330549D23Rik;Lix1l	||	9	3	3	||	0.207143	0.0277778	0.179365	||	5	21	0.238095	|	5	20	0.25	|	2	15	0.133333	||	0	34	0	|	1	12	0.0833333	|	0	9	0	||	Differentially Edited	0.0206963
chr11:96052048	chr11	96052048	-	Intron	||	Ube2z	||	1	2	2	||	0.180303	0	0.180303	||	1	4	0.25	|	1	11	0.0909091	|	1	5	0.2	||	0	1	0	|	0	6	0	|	0	7	0	||	Differentially Edited	0.0616531
chr3:95183561	chr3	95183561	-	UTR	||	Gabpb2	||	73	3	3	||	0.181003	0	0.181003	||	7	73	0.0958904	|	40	150	0.266667	|	24	133	0.180451	||	0	99	0	|	0	147	0	|	0	193	0	||	Differentially Edited	0.0668338
chr4:128752175	chr4	128752175	+	UTR	||	Phc2	||	26	3	3	||	0.181373	0	0.181373	||	10	34	0.294118	|	5	40	0.125	|	4	32	0.125	||	0	47	0	|	0	26	0	|	0	44	0	||	Differentially Edited	0.0845341
chr11:104517868	chr11	104517868	-	Intron	||	Cdc27	||	6	3	3	||	0.181548	0	0.181548	||	1	6	0.166667	|	4	21	0.190476	|	3	16	0.1875	||	0	9	0	|	0	41	0	|	0	22	0	||	Differentially Edited	0.00169772
chr6:66540725	chr6	66540725	+	UTR	||	Mad2l1	||	107	3	3	||	0.183596	0.00154321	0.182053	||	41	192	0.213542	|	43	220	0.195455	|	19	134	0.141791	||	1	216	0.00462963	|	0	107	0	|	0	196	0	||	Differentially Edited	0.0133692
chr16:22854508	chr16	22854508	-	Intron	||	Tbccd1	||	19	3	3	||	0.182311	0	0.182311	||	3	21	0.142857	|	6	31	0.193548	|	4	19	0.210526	||	0	20	0	|	0	36	0	|	0	32	0	||	Differentially Edited	0.0122037
chr14:32296625	chr14	32296625	+	UTR	||	Parg	||	24	3	3	||	0.19648	0.0138889	0.182591	||	12	46	0.26087	|	4	35	0.114286	|	6	28	0.214286	||	0	39	0	|	1	24	0.0416667	|	0	40	0	||	Differentially Edited	0.0412162
chr13:24815611	chr13	24815611	+	intergenic	||	BC005537	||	9	3	3	||	0.182898	0	0.182898	||	2	9	0.222222	|	3	17	0.176471	|	3	20	0.15	||	0	18	0	|	0	30	0	|	0	48	0	||	Differentially Edited	0.0130431
chr2:119105608	chr2	119105608	+	intergenic	||	NA	||	35	3	3	||	0.183606	0	0.183606	||	10	35	0.285714	|	7	68	0.102941	|	6	37	0.162162	||	0	38	0	|	0	42	0	|	0	68	0	||	Differentially Edited	0.0762803
chr7:55977625	chr7	55977625	-	UTR	||	A230056P14Rik;Nipa1	||	21	3	3	||	0.184127	0	0.184127	||	3	21	0.142857	|	8	30	0.266667	|	4	28	0.142857	||	0	25	0	|	0	40	0	|	0	57	0	||	Differentially Edited	0.0467435
chr12:112958239	chr12	112958239	-	intergenic	||	NA	||	11	3	3	||	0.185411	0	0.185411	||	1	11	0.0909091	|	7	40	0.175	|	9	31	0.290323	||	0	15	0	|	0	29	0	|	0	42	0	||	Differentially Edited	0.0849794
chr15:80142466	chr15	80142466	+	Intron	||	Tab1	||	6	3	3	||	0.185897	0	0.185897	||	1	6	0.166667	|	1	12	0.0833333	|	4	13	0.307692	||	0	9	0	|	0	24	0	|	0	29	0	||	Differentially Edited	0.104898
chr4:155622339	chr4	155622339	+	UTR	||	Gm10563;Gm16023;Slc35e2	||	12	3	3	||	0.215344	0.0277778	0.187566	||	3	12	0.25	|	5	36	0.138889	|	9	35	0.257143	||	1	12	0.0833333	|	0	29	0	|	0	34	0	||	Differentially Edited	0.019825
chr8:107171123	chr8	107171123	+	Intron	||	Cyb5b	||	3	3	2	||	0.18759	0	0.18759	||	2	11	0.181818	|	6	28	0.214286	|	2	12	0.166667	||	0	3	0	|	0	7	0	|	0	10	0	||	Differentially Edited	0.0055598
chr16:32299854	chr16	32299854	+	UTR	||	Rnf168	||	43	3	3	||	0.18767	0	0.18767	||	7	43	0.162791	|	12	93	0.129032	|	16	59	0.271186	||	0	87	0	|	0	82	0	|	0	108	0	||	Differentially Edited	0.0484446
chr8:110972577	chr8	110972577	+	intergenic	||	NA	||	15	3	3	||	0.18793	0	0.18793	||	6	22	0.272727	|	7	46	0.152174	|	5	36	0.138889	||	0	15	0	|	0	33	0	|	0	66	0	||	Differentially Edited	0.0476758
chr4:116539239	chr4	116539239	+	intergenic	||	NA	||	11	3	3	||	0.206539	0.0175439	0.188995	||	3	11	0.272727	|	4	19	0.210526	|	3	22	0.136364	||	0	22	0	|	0	34	0	|	1	19	0.0526316	||	Differentially Edited	0.0260633
chr4:141696670	chr4	141696670	-	Intron	||	Ddi2	||	14	3	3	||	0.189419	0	0.189419	||	3	14	0.214286	|	4	41	0.097561	|	10	39	0.25641	||	0	30	0	|	0	32	0	|	0	47	0	||	Differentially Edited	0.0575382
chr1:171698142	chr1	171698142	+	Intron	||	Cd48	||	2	3	2	||	0.189683	0	0.189683	||	2	7	0.285714	|	6	40	0.15	|	4	30	0.133333	||	0	6	0	|	0	10	0	|	0	2	0	||	Differentially Edited	0.0590478
chr4:140950979	chr4	140950979	+	UTR	||	Gm13031;Padi2	||	10	3	3	||	0.190171	0	0.190171	||	3	12	0.25	|	2	13	0.153846	|	2	12	0.166667	||	0	10	0	|	0	17	0	|	0	16	0	||	Differentially Edited	0.0242143
chr12:3431779	chr12	3431779	+	Intron	||	Asxl2	||	10	3	3	||	0.281317	0.089011	0.192306	||	5	12	0.416667	|	10	42	0.238095	|	7	37	0.189189	||	2	10	0.2	|	1	35	0.0285714	|	1	26	0.0384615	||	Differentially Edited	0.0991667
chr17:29653012	chr17	29653012	-	Intron	||	Gm28043;Gm28052	||	21	3	3	||	0.192552	0	0.192552	||	4	23	0.173913	|	5	22	0.227273	|	6	34	0.176471	||	0	21	0	|	0	25	0	|	0	42	0	||	Differentially Edited	0.0080452
chr6:66540190	chr6	66540190	+	UTR	||	Mad2l1	||	20	3	3	||	0.192774	0	0.192774	||	14	53	0.264151	|	16	82	0.195122	|	5	42	0.119048	||	0	46	0	|	0	20	0	|	0	56	0	||	Differentially Edited	0.0441465
chr17:87978399	chr17	87978399	+	Intron	||	Msh6	||	8	3	3	||	0.19625	0	0.19625	||	2	8	0.25	|	3	25	0.12	|	7	32	0.21875	||	0	16	0	|	0	25	0	|	0	36	0	||	Differentially Edited	0.0376184
chr13:49532152	chr13	49532152	-	UTR	||	Cenpp;Ecm2	||	8	3	3	||	0.197849	0	0.197849	||	2	12	0.166667	|	7	30	0.233333	|	6	31	0.193548	||	0	8	0	|	0	19	0	|	0	28	0	||	Differentially Edited	0.00944429
chr11:121291581	chr11	121291581	+	Intron	||	Foxk2	||	10	3	3	||	0.231313	0.0333333	0.19798	||	2	15	0.133333	|	5	15	0.333333	|	5	22	0.227273	||	1	10	0.1	|	0	25	0	|	0	31	0	||	Differentially Edited	0.054576
chr5:3785488	chr5	3785488	-	Intron	||	Ankib1	||	7	3	3	||	0.198375	0	0.198375	||	2	7	0.285714	|	5	33	0.151515	|	3	19	0.157895	||	0	10	0	|	0	20	0	|	0	19	0	||	Differentially Edited	0.0452753
chr4:141696676	chr4	141696676	-	Intron	||	Ddi2	||	14	3	3	||	0.198413	0	0.198413	||	2	14	0.142857	|	8	42	0.190476	|	11	42	0.261905	||	0	27	0	|	0	29	0	|	0	46	0	||	Differentially Edited	0.0290805
chr2:180907526	chr2	180907526	-	Intron	||	Ythdf1	||	2	3	2	||	0.199495	0	0.199495	||	1	6	0.166667	|	2	11	0.181818	|	2	8	0.25	||	0	5	0	|	0	2	0	|	0	5	0	||	Differentially Edited	0.0161061
chr13:24759369	chr13	24759369	-	Intron	||	Gmnn	||	2	3	2	||	0.199786	0	0.199786	||	1	6	0.166667	|	2	16	0.125	|	4	13	0.307692	||	0	2	0	|	0	9	0	|	0	38	0	||	Differentially Edited	0.0687524
chr10:78186427	chr10	78186427	-	intergenic	||	NA	||	5	3	3	||	0.2	0	0.2	||	1	10	0.1	|	3	10	0.3	|	1	5	0.2	||	0	13	0	|	0	15	0	|	0	14	0	||	Differentially Edited	0.0741799
chr17:35857734	chr17	35857734	+	UTR	||	Mdc1	||	19	3	3	||	0.200228	0	0.200228	||	6	34	0.176471	|	7	45	0.155556	|	18	67	0.268657	||	0	19	0	|	0	28	0	|	0	141	0	||	Differentially Edited	0.0288137
chr6:66540740	chr6	66540740	+	UTR	||	Mad2l1	||	97	3	3	||	0.20109	0	0.20109	||	37	196	0.188776	|	46	235	0.195745	|	28	128	0.21875	||	0	209	0	|	0	97	0	|	0	186	0	||	Differentially Edited	0.00202208
chr11:82963215	chr11	82963215	+	intergenic	||	Slfn5	||	7	3	3	||	0.201754	0	0.201754	||	2	7	0.285714	|	6	28	0.214286	|	2	19	0.105263	||	0	16	0	|	0	25	0	|	0	10	0	||	Differentially Edited	0.0614598
chr7:100459257	chr7	100459257	+	Exon	||	C2cd3;Gm10603;Gm37716	||	3	3	2	||	0.201852	0	0.201852	||	2	9	0.222222	|	1	12	0.0833333	|	3	10	0.3	||	0	3	0	|	0	10	0	|	0	22	0	||	Differentially Edited	0.0860322
chrX:150985522	chrX	150985522	-	UTR	||	Gnl3l	||	29	3	3	||	0.20282	0	0.20282	||	6	35	0.171429	|	7	29	0.241379	|	9	46	0.195652	||	0	33	0	|	0	60	0	|	0	66	0	||	Differentially Edited	0.0100705
chr17:33928554	chr17	33928554	+	UTR	||	Tapbp	||	53	3	3	||	0.20309	0	0.20309	||	16	53	0.301887	|	20	103	0.194175	|	6	53	0.113208	||	0	75	0	|	0	62	0	|	0	74	0	||	Differentially Edited	0.0653868
chr11:4479025	chr11	4479025	-	intergenic	||	NA	||	9	3	3	||	0.240404	0.037037	0.203367	||	3	11	0.272727	|	4	15	0.266667	|	2	11	0.181818	||	1	9	0.111111	|	0	22	0	|	0	35	0	||	Differentially Edited	0.0140762
chr1:37442392	chr1	37442392	-	UTR	||	Mgat4a	||	8	3	3	||	0.203509	0	0.203509	||	2	8	0.25	|	3	20	0.15	|	4	19	0.210526	||	0	11	0	|	0	14	0	|	0	22	0	||	Differentially Edited	0.0198136
chr4:117168962	chr4	117168962	-	Intron	||	Kif2c	||	7	3	3	||	0.204762	0	0.204762	||	1	10	0.1	|	3	14	0.214286	|	3	10	0.3	||	0	9	0	|	0	7	0	|	0	12	0	||	Differentially Edited	0.0715579
chr2:119104953	chr2	119104953	+	UTR	||	Knl1	||	33	3	3	||	0.204983	0	0.204983	||	8	33	0.242424	|	14	112	0.125	|	25	101	0.247525	||	0	55	0	|	0	83	0	|	0	132	0	||	Differentially Edited	0.036065
chr1:93793282	chr1	93793282	+	Intron	||	Dtymk	||	3	2	2	||	0.205026	0	0.205026	||	1	4	0.25	|	2	9	0.222222	|	1	7	0.142857	||	0	3	0	|	0	8	0	|	0	11	0	||	Differentially Edited	0.0236499
chr3:30804422	chr3	30804422	+	Intron	||	Sec62	||	3	2	2	||	0.205051	0	0.205051	||	1	3	0.333333	|	1	10	0.1	|	2	11	0.181818	||	0	4	0	|	0	12	0	|	0	16	0	||	Differentially Edited	0.09547
chr17:36003894	chr17	36003894	-	Intron	||	A930015D03Rik	||	1	3	2	||	0.20559	0	0.20559	||	1	7	0.142857	|	4	23	0.173913	|	3	10	0.3	||	0	6	0	|	0	1	0	|	0	12	0	||	Differentially Edited	0.0505178
chr14:31701507	chr14	31701507	-	UTR	||	Ankrd28	||	13	3	3	||	0.205929	0	0.205929	||	3	13	0.230769	|	5	32	0.15625	|	6	26	0.230769	||	0	40	0	|	0	30	0	|	0	41	0	||	Differentially Edited	0.0142398
chr3:51226105	chr3	51226105	+	Intron	||	Noct	||	27	3	3	||	0.218397	0.0123457	0.206051	||	23	66	0.348485	|	12	89	0.134831	|	11	64	0.171875	||	1	27	0.037037	|	0	40	0	|	0	72	0	||	Differentially Edited	0.0841801
chr12:54672358	chr12	54672358	-	UTR	||	Eapp	||	15	3	3	||	0.206469	0	0.206469	||	4	18	0.222222	|	7	44	0.159091	|	5	21	0.238095	||	0	21	0	|	0	15	0	|	0	30	0	||	Differentially Edited	0.0133831
chr9:44609944	chr9	44609944	+	Intron	||	Ddx6	||	10	3	3	||	0.206595	0	0.206595	||	3	11	0.272727	|	7	35	0.2	|	5	34	0.147059	||	0	10	0	|	0	31	0	|	0	26	0	||	Differentially Edited	0.0297103
chr8:124016929	chr8	124016929	-	Intron	||	Gm20388;Taf5l	||	1	3	2	||	0.207407	0	0.207407	||	1	5	0.2	|	1	5	0.2	|	2	9	0.222222	||	0	1	0	|	0	5	0	|	0	12	0	||	Differentially Edited	0.00127307
chr6:120735178	chr6	120735178	+	Intron	||	Cecr2	||	5	3	3	||	0.208081	0	0.208081	||	2	6	0.333333	|	4	44	0.0909091	|	5	25	0.2	||	0	5	0	|	0	9	0	|	0	12	0	||	Differentially Edited	0.0972203
chr2:157199860	chr2	157199860	-	Intron	||	Rbl1	||	6	3	3	||	0.236551	0.0277778	0.208773	||	1	6	0.166667	|	8	26	0.307692	|	4	17	0.235294	||	1	12	0.0833333	|	0	19	0	|	0	29	0	||	Differentially Edited	0.0173019
chr18:77070397	chr18	77070397	+	Intron	||	Pias2	||	7	3	3	||	0.209177	0	0.209177	||	2	7	0.285714	|	4	25	0.16	|	6	33	0.181818	||	0	8	0	|	0	15	0	|	0	28	0	||	Differentially Edited	0.0326994
chr18:32102504	chr18	32102504	+	UTR	||	Iws1	||	13	3	3	||	0.210068	0	0.210068	||	4	13	0.307692	|	4	42	0.0952381	|	5	22	0.227273	||	0	16	0	|	0	47	0	|	0	36	0	||	Differentially Edited	0.0770088
chr10:78186162	chr10	78186162	-	intergenic	||	NA	||	4	3	2	||	0.211412	0	0.211412	||	2	8	0.25	|	7	29	0.241379	|	2	14	0.142857	||	0	19	0	|	0	4	0	|	0	13	0	||	Differentially Edited	0.0254232
chr8:124894190	chr8	124894190	-	UTR	||	Exoc8	||	16	3	3	||	0.211484	0	0.211484	||	5	16	0.3125	|	7	35	0.2	|	5	41	0.121951	||	0	21	0	|	0	20	0	|	0	38	0	||	Differentially Edited	0.0620875
chr2:31030384	chr2	31030384	-	UTR	||	Fnbp1	||	7	3	3	||	0.259991	0.047619	0.212372	||	3	9	0.333333	|	3	11	0.272727	|	4	23	0.173913	||	1	7	0.142857	|	0	15	0	|	0	18	0	||	Differentially Edited	0.0331749
chr2:120602217	chr2	120602217	+	intergenic	||	NA	||	16	3	3	||	0.231439	0.0190476	0.212392	||	5	16	0.3125	|	6	33	0.181818	|	5	25	0.2	||	0	24	0	|	2	35	0.0571429	|	0	33	0	||	Differentially Edited	0.0206198
chr8:94017816	chr8	94017816	-	UTR	||	Nudt21	||	5	3	3	||	0.213131	0	0.213131	||	1	5	0.2	|	3	11	0.272727	|	1	6	0.166667	||	0	6	0	|	0	12	0	|	0	7	0	||	Differentially Edited	0.0209107
chr17:36003920	chr17	36003920	-	Intron	||	A930015D03Rik	||	2	3	2	||	0.213675	0	0.213675	||	1	6	0.166667	|	5	30	0.166667	|	4	13	0.307692	||	0	5	0	|	0	2	0	|	0	10	0	||	Differentially Edited	0.0451475
chr17:25929396	chr17	25929396	-	Intron	||	Gm16278;Gm26694;Pigq	||	69	3	3	||	0.214707	0	0.214707	||	29	94	0.308511	|	37	164	0.22561	|	11	100	0.11	||	0	85	0	|	0	69	0	|	0	163	0	||	Differentially Edited	0.0649548
chr11:54773716	chr11	54773716	-	Intron	||	Cdc42se2	||	3	3	2	||	0.214815	0	0.214815	||	3	9	0.333333	|	1	9	0.111111	|	2	10	0.2	||	0	3	0	|	0	11	0	|	0	6	0	||	Differentially Edited	0.0797128
chr4:21834549	chr4	21834549	+	UTR	||	Usp45	||	28	3	3	||	0.215608	0	0.215608	||	5	28	0.178571	|	8	42	0.190476	|	10	36	0.277778	||	0	42	0	|	0	29	0	|	0	54	0	||	Differentially Edited	0.020398
chr5:30904075	chr5	30904075	-	Intron	||	Agbl5	||	4	3	2	||	0.215741	0	0.215741	||	2	9	0.222222	|	1	8	0.125	|	3	10	0.3	||	0	4	0	|	0	12	0	|	0	24	0	||	Differentially Edited	0.0508909
chr3:95183940	chr3	95183940	-	UTR	||	Gabpb2	||	38	3	3	||	0.216975	0	0.216975	||	9	38	0.236842	|	16	78	0.205128	|	14	67	0.208955	||	0	41	0	|	0	61	0	|	0	93	0	||	Differentially Edited	0.00211515
chr5:114769263	chr5	114769263	-	Intron	||	Git2	||	8	3	3	||	0.25049	0.0333333	0.217157	||	3	8	0.375	|	9	45	0.2	|	3	17	0.176471	||	0	10	0	|	0	24	0	|	2	20	0.1	||	Differentially Edited	0.0537953
chr2:126892919	chr2	126892919	-	UTR	||	Sppl2a	||	13	3	3	||	0.243105	0.025641	0.217464	||	2	18	0.111111	|	16	47	0.340426	|	10	36	0.277778	||	1	13	0.0769231	|	0	17	0	|	0	16	0	||	Differentially Edited	0.0719863
chr4:45377141	chr4	45377141	+	UTR	||	Dcaf10	||	21	3	3	||	0.21826	0	0.21826	||	6	27	0.222222	|	10	50	0.2	|	10	43	0.232558	||	0	21	0	|	0	51	0	|	0	46	0	||	Differentially Edited	0.00193111
chr11:116122845	chr11	116122845	-	UTR	||	Trim47;Trim65	||	3	3	2	||	0.218305	0	0.218305	||	4	13	0.307692	|	4	32	0.125	|	2	9	0.222222	||	0	3	0	|	0	6	0	|	0	8	0	||	Differentially Edited	0.0537723
chr9:106239916	chr9	106239916	-	Exon	||	Alas1	||	4	3	2	||	0.27399	0.0555556	0.218434	||	4	11	0.363636	|	2	12	0.166667	|	7	24	0.291667	||	0	4	0	|	2	12	0.166667	|	0	36	0	||	Differentially Edited	0.0524628
chr9:22241287	chr9	22241287	+	Intron	||	Zfp809	||	2	3	2	||	0.220623	0	0.220623	||	3	11	0.272727	|	4	17	0.235294	|	2	13	0.153846	||	0	5	0	|	0	9	0	|	0	2	0	||	Differentially Edited	0.0243802
chr9:65906726	chr9	65906726	+	Intron	||	Trip4	||	6	3	3	||	0.222612	0	0.222612	||	1	6	0.166667	|	7	31	0.225806	|	19	69	0.275362	||	0	12	0	|	0	64	0	|	0	120	0	||	Differentially Edited	0.0193431
chr11:82963228	chr11	82963228	+	intergenic	||	Slfn5	||	7	3	3	||	0.223343	0	0.223343	||	2	7	0.285714	|	8	30	0.266667	|	2	17	0.117647	||	0	15	0	|	0	25	0	|	0	7	0	||	Differentially Edited	0.0522039
chr12:54672253	chr12	54672253	-	UTR	||	Eapp	||	6	3	3	||	0.223425	0	0.223425	||	2	9	0.222222	|	1	11	0.0909091	|	5	14	0.357143	||	0	6	0	|	0	14	0	|	0	17	0	||	Differentially Edited	0.100764
chr16:22854524	chr16	22854524	-	Intron	||	Tbccd1	||	15	3	3	||	0.223464	0	0.223464	||	6	23	0.26087	|	8	30	0.266667	|	3	21	0.142857	||	0	15	0	|	0	34	0	|	0	31	0	||	Differentially Edited	0.0310743
chr15:6662458	chr15	6662458	+	Intron	||	Fyb	||	5	3	3	||	0.247619	0.0238095	0.22381	||	2	5	0.4	|	3	15	0.2	|	2	14	0.142857	||	0	6	0	|	1	14	0.0714286	|	0	12	0	||	Differentially Edited	0.092219
chr4:59193295	chr4	59193295	+	Intron	||	Ugcg	||	6	3	3	||	0.296018	0.0714286	0.224589	||	4	14	0.285714	|	8	18	0.444444	|	3	19	0.157895	||	1	6	0.166667	|	1	21	0.047619	|	0	20	0	||	Differentially Edited	0.0953568
chr5:125456906	chr5	125456906	+	UTR	||	Bri3bp	||	5	3	3	||	0.224916	0	0.224916	||	1	5	0.2	|	4	11	0.363636	|	1	9	0.111111	||	0	11	0	|	0	8	0	|	0	13	0	||	Differentially Edited	0.0932413
chr11:87310541	chr11	87310541	-	Intron	||	Ppm1e	||	7	3	3	||	0.315954	0.0892857	0.226668	||	8	17	0.470588	|	9	44	0.204545	|	6	22	0.272727	||	2	16	0.125	|	1	7	0.142857	|	0	31	0	||	Differentially Edited	0.0855227
chr3:89379223	chr3	89379223	-	UTR	||	Zbtb7b	||	8	3	3	||	0.227583	0	0.227583	||	2	8	0.25	|	6	27	0.222222	|	4	19	0.210526	||	0	12	0	|	0	18	0	|	0	33	0	||	Differentially Edited	0.00263526
chr11:95487042	chr11	95487042	+	Intron	||	Spop	||	9	3	3	||	0.264621	0.037037	0.227584	||	4	10	0.4	|	5	23	0.217391	|	3	17	0.176471	||	1	9	0.111111	|	0	14	0	|	0	21	0	||	Differentially Edited	0.0599669
chr17:36003860	chr17	36003860	-	Intron	||	A930015D03Rik	||	2	3	2	||	0.228283	0	0.228283	||	1	5	0.2	|	4	33	0.121212	|	4	11	0.363636	||	0	6	0	|	0	2	0	|	0	13	0	||	Differentially Edited	0.0854623
chr8:111954293	chr8	111954293	+	intergenic	||	NA	||	12	3	3	||	0.228836	0	0.228836	||	3	14	0.214286	|	5	20	0.25	|	4	18	0.222222	||	0	12	0	|	0	60	0	|	0	54	0	||	Differentially Edited	0.00223114
chr2:84332775	chr2	84332775	-	UTR	||	Calcrl	||	13	3	3	||	0.229167	0	0.229167	||	6	18	0.333333	|	4	24	0.166667	|	6	32	0.1875	||	0	16	0	|	0	13	0	|	0	23	0	||	Differentially Edited	0.0485606
chr7:100459260	chr7	100459260	+	Exon	||	C2cd3;Gm10603;Gm37716	||	2	3	2	||	0.22963	0	0.22963	||	2	9	0.222222	|	2	12	0.166667	|	3	10	0.3	||	0	2	0	|	0	11	0	|	0	22	0	||	Differentially Edited	0.0272041
chr7:113532619	chr7	113532619	+	Intron	||	Far1;Far1os	||	3	2	2	||	0.230159	0	0.230159	||	1	3	0.333333	|	3	18	0.166667	|	4	21	0.190476	||	0	3	0	|	0	11	0	|	0	17	0	||	Differentially Edited	0.047515
chr7:102473467	chr7	102473467	+	intergenic	||	NA	||	2	2	2	||	0.231481	0	0.231481	||	1	4	0.25	|	4	12	0.333333	|	1	9	0.111111	||	0	2	0	|	0	7	0	|	0	24	0	||	Differentially Edited	0.07024
chr12:54671755	chr12	54671755	-	UTR	||	Eapp	||	9	3	3	||	0.232435	0	0.232435	||	3	9	0.333333	|	3	16	0.1875	|	3	17	0.176471	||	0	11	0	|	0	18	0	|	0	27	0	||	Differentially Edited	0.044186
chr11:96052045	chr11	96052045	-	Intron	||	Ube2z	||	1	2	2	||	0.233333	0	0.233333	||	1	4	0.25	|	3	12	0.25	|	1	5	0.2	||	0	1	0	|	0	7	0	|	0	8	0	||	Differentially Edited	0.00506332
chr5:3785487	chr5	3785487	-	Intron	||	Ankib1	||	7	3	3	||	0.234276	0	0.234276	||	2	7	0.285714	|	6	33	0.181818	|	4	17	0.235294	||	0	10	0	|	0	22	0	|	0	19	0	||	Differentially Edited	0.0160017
chrX:150985455	chrX	150985455	-	UTR	||	Gnl3l	||	20	3	3	||	0.23468	0	0.23468	||	6	20	0.3	|	6	27	0.222222	|	8	44	0.181818	||	0	24	0	|	0	51	0	|	0	47	0	||	Differentially Edited	0.0211475
chr2:25606247	chr2	25606247	-	Intron	||	Rabl6	||	12	3	3	||	0.235897	0	0.235897	||	4	13	0.307692	|	3	20	0.15	|	4	16	0.25	||	0	12	0	|	0	21	0	|	0	22	0	||	Differentially Edited	0.036081
chr4:116552902	chr4	116552902	-	UTR	||	Tmem69	||	10	3	3	||	0.236111	0	0.236111	||	6	16	0.375	|	2	15	0.133333	|	2	10	0.2	||	0	17	0	|	0	14	0	|	0	10	0	||	Differentially Edited	0.0818721
chr4:98117441	chr4	98117441	+	UTR	||	Nfia	||	5	3	3	||	0.238384	0	0.238384	||	1	5	0.2	|	2	6	0.333333	|	2	11	0.181818	||	0	10	0	|	0	8	0	|	0	10	0	||	Differentially Edited	0.0378801
chr17:29654269	chr17	29654269	-	Intron	||	Gm28043;Gm28052	||	29	3	3	||	0.238559	0	0.238559	||	9	41	0.219512	|	8	34	0.235294	|	12	46	0.26087	||	0	48	0	|	0	29	0	|	0	68	0	||	Differentially Edited	0.00254167
chr2:119107335	chr2	119107335	+	intergenic	||	NA	||	4	2	3	||	0.241182	0	0.241182	||	1	4	0.25	|	7	27	0.259259	|	3	14	0.214286	||	0	5	0	|	0	14	0	|	0	37	0	||	Differentially Edited	0.00321627
chr18:32102542	chr18	32102542	+	UTR	||	Iws1	||	16	3	3	||	0.241355	0	0.241355	||	5	16	0.3125	|	12	49	0.244898	|	4	24	0.166667	||	0	18	0	|	0	55	0	|	0	39	0	||	Differentially Edited	0.029152
chr17:25929316	chr17	25929316	-	Intron	||	Gm16278;Gm26694;Pigq	||	36	3	3	||	0.241467	0	0.241467	||	14	36	0.388889	|	11	64	0.171875	|	9	55	0.163636	||	0	49	0	|	0	41	0	|	0	65	0	||	Differentially Edited	0.081976
chr12:111645015	chr12	111645015	+	Intron	||	Mark3	||	1	2	2	||	0.242063	0	0.242063	||	1	3	0.333333	|	2	14	0.142857	|	3	12	0.25	||	0	1	0	|	0	6	0	|	0	5	0	||	Differentially Edited	0.0481523
chr3:116744159	chr3	116744159	-	UTR	||	Agl	||	16	3	3	||	0.258553	0.015873	0.24268	||	5	16	0.3125	|	9	45	0.2	|	10	38	0.263158	||	1	21	0.047619	|	0	19	0	|	0	23	0	||	Differentially Edited	0.0075408
chr2:5019996	chr2	5019996	-	intergenic	||	NA	||	4	3	2	||	0.243452	0	0.243452	||	2	5	0.4	|	6	32	0.1875	|	4	28	0.142857	||	0	4	0	|	0	5	0	|	0	10	0	||	Differentially Edited	0.0917903
chr11:77689184	chr11	77689184	+	Intron	||	Nufip2	||	4	2	3	||	0.24372	0	0.24372	||	1	4	0.25	|	8	23	0.347826	|	2	15	0.133333	||	0	19	0	|	0	27	0	|	0	21	0	||	Differentially Edited	0.0590384
chr10:78186147	chr10	78186147	-	intergenic	||	NA	||	4	3	2	||	0.244139	0	0.244139	||	2	5	0.4	|	5	28	0.178571	|	2	13	0.153846	||	0	20	0	|	0	4	0	|	0	12	0	||	Differentially Edited	0.0892112
chr2:119107337	chr2	119107337	+	intergenic	||	NA	||	4	2	3	||	0.244505	0	0.244505	||	1	4	0.25	|	7	26	0.269231	|	3	14	0.214286	||	0	5	0	|	0	15	0	|	0	35	0	||	Differentially Edited	0.00430649
chr2:157558149	chr2	157558149	-	Exon	||	Blcap	||	15	3	3	||	0.246032	0	0.246032	||	3	20	0.15	|	5	21	0.238095	|	7	20	0.35	||	0	15	0	|	0	18	0	|	0	23	0	||	Differentially Edited	0.0511222
chr1:191830057	chr1	191830057	+	Intron	||	Nek2	||	9	3	3	||	0.26455	0.0175439	0.247006	||	2	9	0.222222	|	10	35	0.285714	|	6	21	0.285714	||	1	19	0.0526316	|	0	32	0	|	0	35	0	||	Differentially Edited	0.000991295
chr6:38289117	chr6	38289117	-	UTR	||	Zc3hav1l	||	7	3	3	||	0.248016	0	0.248016	||	2	7	0.285714	|	2	16	0.125	|	3	9	0.333333	||	0	10	0	|	0	9	0	|	0	14	0	||	Differentially Edited	0.058926
chr9:66373543	chr9	66373543	+	Exon	||	Herc1	||	44	3	3	||	0.262315	0.012704	0.249611	||	31	75	0.413333	|	25	144	0.173611	|	21	105	0.2	||	1	44	0.0227273	|	0	73	0	|	3	195	0.0153846	||	Differentially Edited	0.0802067
chrX:150985529	chrX	150985529	-	UTR	||	Gnl3l	||	29	3	3	||	0.25003	0	0.25003	||	5	35	0.142857	|	7	29	0.241379	|	15	41	0.365854	||	0	30	0	|	0	52	0	|	0	63	0	||	Differentially Edited	0.0605972
chr12:3431771	chr12	3431771	+	Intron	||	Asxl2	||	13	3	3	||	0.251239	0	0.251239	||	5	14	0.357143	|	8	43	0.186047	|	8	38	0.210526	||	0	13	0	|	0	35	0	|	0	28	0	||	Differentially Edited	0.0423607
chr3:103066090	chr3	103066090	+	UTR	||	Nras	||	92	3	3	||	0.268975	0.0177346	0.251241	||	29	96	0.302083	|	48	199	0.241206	|	29	110	0.263636	||	3	92	0.0326087	|	2	146	0.0136986	|	1	145	0.00689655	||	Differentially Edited	0.00158119
chr7:102471869	chr7	102471869	+	intergenic	||	NA	||	4	2	3	||	0.252165	0	0.252165	||	1	4	0.25	|	4	11	0.363636	|	1	7	0.142857	||	0	5	0	|	0	10	0	|	0	17	0	||	Differentially Edited	0.058361
chr4:156010666	chr4	156010666	+	UTR	||	Sdf4	||	8	3	3	||	0.253788	0	0.253788	||	2	8	0.25	|	3	8	0.375	|	3	22	0.136364	||	0	12	0	|	0	24	0	|	0	16	0	||	Differentially Edited	0.0664684
chr13:17804344	chr13	17804344	-	Exon	||	Cdk13	||	6	3	3	||	0.366667	0.111742	0.254924	||	2	6	0.333333	|	6	20	0.3	|	7	15	0.466667	||	6	22	0.272727	|	0	10	0	|	1	16	0.0625	||	Differentially Edited	0.0702678
chr15:89243757	chr15	89243757	+	intergenic	||	Ppp6r2	||	3	2	3	||	0.255051	0	0.255051	||	1	3	0.333333	|	2	8	0.25	|	2	11	0.181818	||	0	10	0	|	0	15	0	|	0	13	0	||	Differentially Edited	0.028262
chr3:116676859	chr3	116676859	-	Intron	||	Gm43191;Slc35a3	||	0	3	2	||	0.295271	0.04	0.255271	||	3	10	0.3	|	5	23	0.217391	|	7	19	0.368421	||	0	0	NA	|	0	24	0	|	2	25	0.08	||	Differentially Edited	0.0262401
chr7:102471885	chr7	102471885	+	intergenic	||	NA	||	4	2	3	||	0.258333	0	0.258333	||	1	4	0.25	|	4	10	0.4	|	1	8	0.125	||	0	5	0	|	0	9	0	|	0	18	0	||	Differentially Edited	0.0830649
chr12:85235104	chr12	85235104	-	UTR	||	Mlh3	||	4	3	2	||	0.258598	0	0.258598	||	1	8	0.125	|	2	9	0.222222	|	3	7	0.428571	||	0	4	0	|	0	15	0	|	0	5	0	||	Differentially Edited	0.101818
chr4:21834782	chr4	21834782	+	UTR	||	Usp45	||	35	3	3	||	0.271571	0.0125786	0.258992	||	11	35	0.314286	|	11	70	0.157143	|	23	67	0.343284	||	2	53	0.0377358	|	0	45	0	|	0	91	0	||	Differentially Edited	0.0410503
chrX:7797591	chrX	7797591	+	Intron	||	Gripap1	||	2	3	2	||	0.259259	0	0.259259	||	2	6	0.333333	|	6	27	0.222222	|	2	9	0.222222	||	0	2	0	|	0	15	0	|	0	13	0	||	Differentially Edited	0.0198039
chr19:40740988	chr19	40740988	+	UTR	||	Entpd1	||	7	3	3	||	0.259425	0	0.259425	||	1	7	0.142857	|	11	32	0.34375	|	7	24	0.291667	||	0	15	0	|	0	23	0	|	0	20	0	||	Differentially Edited	0.0498429
chr17:25929470	chr17	25929470	-	Intron	||	Gm16278;Gm26694;Pigq	||	60	3	3	||	0.260924	0	0.260924	||	30	71	0.422535	|	31	131	0.236641	|	11	89	0.123596	||	0	69	0	|	0	60	0	|	0	155	0	||	Differentially Edited	0.0957908
chr5:135408861	chr5	135408861	-	UTR	||	Hip1	||	6	3	3	||	0.261294	0	0.261294	||	4	13	0.307692	|	2	6	0.333333	|	2	14	0.142857	||	0	15	0	|	0	15	0	|	0	12	0	||	Differentially Edited	0.0484094
chr7:55977246	chr7	55977246	-	Intron	||	A230056P14Rik	||	0	3	2	||	0.263426	0	0.263426	||	5	16	0.3125	|	5	18	0.277778	|	1	5	0.2	||	0	9	0	|	0	0	NA	|	0	9	0	||	Differentially Edited	0.0155695
chr6:30486135	chr6	30486135	-	Intron	||	Tmem209	||	5	3	3	||	0.263458	0	0.263458	||	2	5	0.4	|	2	17	0.117647	|	3	11	0.272727	||	0	7	0	|	0	5	0	|	0	11	0	||	Differentially Edited	0.0840897
chr6:66540214	chr6	66540214	+	UTR	||	Mad2l1	||	21	3	3	||	0.263916	0	0.263916	||	19	62	0.306452	|	11	89	0.123596	|	17	47	0.361702	||	0	49	0	|	0	21	0	|	0	59	0	||	Differentially Edited	0.0669474
chr2:132309669	chr2	132309669	+	UTR	||	Cds2	||	7	3	3	||	0.350072	0.0814815	0.268591	||	4	11	0.363636	|	6	35	0.171429	|	17	33	0.515152	||	1	7	0.142857	|	2	35	0.0571429	|	2	45	0.0444444	||	Differentially Edited	0.103332
chr11:87310542	chr11	87310542	-	Intron	||	Ppm1e	||	7	3	3	||	0.269162	0	0.269162	||	6	17	0.352941	|	4	44	0.0909091	|	8	22	0.363636	||	0	16	0	|	0	7	0	|	0	31	0	||	Differentially Edited	0.0944762
chr9:21908927	chr9	21908927	-	UTR	||	Rab3d	||	19	3	3	||	0.269283	0	0.269283	||	9	26	0.346154	|	11	43	0.255814	|	7	34	0.205882	||	0	19	0	|	0	30	0	|	0	50	0	||	Differentially Edited	0.0224576
chr5:130206185	chr5	130206185	+	Intron	||	Rabgef1	||	5	3	3	||	0.269444	0	0.269444	||	3	8	0.375	|	2	15	0.133333	|	3	10	0.3	||	0	5	0	|	0	15	0	|	0	11	0	||	Differentially Edited	0.0636211
chr14:86911657	chr14	86911657	-	Intron	||	Diaph3	||	8	3	3	||	0.269841	0	0.269841	||	4	12	0.333333	|	5	35	0.142857	|	8	24	0.333333	||	0	8	0	|	0	19	0	|	0	36	0	||	Differentially Edited	0.0511525
chr4:155621904	chr4	155621904	+	UTR	||	Gm10563;Gm16023;Slc35e2	||	25	3	3	||	0.270192	0	0.270192	||	5	25	0.2	|	17	48	0.354167	|	20	78	0.25641	||	0	43	0	|	0	89	0	|	0	90	0	||	Differentially Edited	0.0266742
chr2:164753271	chr2	164753271	+	Intron	||	Dnttip1	||	14	3	3	||	0.298824	0.0270833	0.27174	||	6	15	0.4	|	3	17	0.176471	|	8	25	0.32	||	1	20	0.05	|	0	14	0	|	1	32	0.03125	||	Differentially Edited	0.0474527
chr5:3785993	chr5	3785993	-	Intron	||	Ankib1	||	4	3	2	||	0.355556	0.0833333	0.272222	||	3	9	0.333333	|	3	9	0.333333	|	4	10	0.4	||	1	4	0.25	|	0	7	0	|	0	10	0	||	Differentially Edited	0.0736191
chr2:119104882	chr2	119104882	+	UTR	||	Knl1	||	37	3	3	||	0.272757	0	0.272757	||	12	37	0.324324	|	30	140	0.214286	|	33	118	0.279661	||	0	77	0	|	0	110	0	|	0	134	0	||	Differentially Edited	0.013447
chr9:73096640	chr9	73096640	+	UTR	||	Rab27a	||	21	3	3	||	0.272917	0	0.272917	||	8	21	0.380952	|	5	22	0.227273	|	8	38	0.210526	||	0	22	0	|	0	31	0	|	0	44	0	||	Differentially Edited	0.0372937
chr12:54672285	chr12	54672285	-	UTR	||	Eapp	||	12	3	3	||	0.273863	0	0.273863	||	5	17	0.294118	|	4	28	0.142857	|	5	13	0.384615	||	0	12	0	|	0	14	0	|	0	24	0	||	Differentially Edited	0.0603658
chr10:128799433	chr10	128799433	+	UTR	||	AC131081.1;Mmp19	||	6	3	3	||	0.31746	0.0416667	0.275794	||	1	6	0.166667	|	3	6	0.5	|	2	7	0.285714	||	0	6	0	|	0	6	0	|	1	8	0.125	||	Differentially Edited	0.0892759
chr3:88352191	chr3	88352191	+	Exon	||	Smg5	||	39	3	3	||	0.326326	0.0500313	0.276294	||	18	43	0.418605	|	21	80	0.2625	|	14	47	0.297872	||	3	41	0.0731707	|	3	39	0.0769231	|	0	49	0	||	Differentially Edited	0.013604
chr2:120733821	chr2	120733821	-	UTR	||	Cdan1;Ttbk2	||	7	3	3	||	0.276844	0	0.276844	||	3	7	0.428571	|	4	17	0.235294	|	3	18	0.166667	||	0	7	0	|	0	20	0	|	0	22	0	||	Differentially Edited	0.0716942
chr18:56956934	chr18	56956934	-	UTR	||	C330018D20Rik	||	13	3	3	||	0.277917	0	0.277917	||	6	16	0.375	|	7	32	0.21875	|	6	25	0.24	||	0	13	0	|	0	14	0	|	0	21	0	||	Differentially Edited	0.0296239
chr3:35808056	chr3	35808056	+	Exon	||	Atp11b	||	10	3	3	||	0.278059	0	0.278059	||	7	24	0.291667	|	6	38	0.157895	|	10	26	0.384615	||	0	10	0	|	0	42	0	|	0	34	0	||	Differentially Edited	0.0516968
chr4:45377142	chr4	45377142	+	UTR	||	Dcaf10	||	20	3	3	||	0.279412	0	0.279412	||	7	28	0.25	|	13	51	0.254902	|	14	42	0.333333	||	0	20	0	|	0	48	0	|	0	46	0	||	Differentially Edited	0.00920746
chr12:54672357	chr12	54672357	-	UTR	||	Eapp	||	16	3	3	||	0.281313	0	0.281313	||	3	18	0.166667	|	10	44	0.227273	|	9	20	0.45	||	0	20	0	|	0	16	0	|	0	30	0	||	Differentially Edited	0.0823449
chr1:63117003	chr1	63117003	+	Intron	||	Ino80dos	||	13	3	3	||	0.288386	0.00666667	0.281719	||	4	13	0.307692	|	17	49	0.346939	|	8	38	0.210526	||	0	21	0	|	1	50	0.02	|	0	54	0	||	Differentially Edited	0.0179358
chr17:94758928	chr17	94758928	+	Intron	||	2700099C18Rik	||	7	3	3	||	0.28228	0	0.28228	||	3	7	0.428571	|	6	32	0.1875	|	3	13	0.230769	||	0	8	0	|	0	28	0	|	0	8	0	||	Differentially Edited	0.0626766
chr6:87578012	chr6	87578012	-	intergenic	||	NA	||	3	3	2	||	0.282828	0	0.282828	||	4	12	0.333333	|	4	22	0.181818	|	2	6	0.333333	||	0	7	0	|	0	3	0	|	0	10	0	||	Differentially Edited	0.0304393
chr6:113539908	chr6	113539908	+	Intron	||	Fancd2	||	5	3	3	||	0.286111	0	0.286111	||	2	5	0.4	|	3	9	0.333333	|	1	8	0.125	||	0	5	0	|	0	12	0	|	0	12	0	||	Differentially Edited	0.0745475
chr17:74251706	chr17	74251706	-	Intron	||	Memo1	||	18	3	3	||	0.287037	0	0.287037	||	5	18	0.277778	|	15	60	0.25	|	14	42	0.333333	||	0	19	0	|	0	78	0	|	0	75	0	||	Differentially Edited	0.00720545
chr4:132772528	chr4	132772528	+	Intron	||	Rpa2	||	3	3	2	||	0.288889	0	0.288889	||	4	9	0.444444	|	2	10	0.2	|	2	9	0.222222	||	0	3	0	|	0	10	0	|	0	19	0	||	Differentially Edited	0.0658515
chr8:72478919	chr8	72478919	-	intergenic	||	NA	||	4	3	2	||	0.290339	0	0.290339	||	4	9	0.444444	|	2	13	0.153846	|	3	11	0.272727	||	0	4	0	|	0	11	0	|	0	12	0	||	Differentially Edited	0.0750268
chr2:119106988	chr2	119106988	+	intergenic	||	NA	||	6	3	3	||	0.291667	0	0.291667	||	6	16	0.375	|	11	77	0.142857	|	5	14	0.357143	||	0	6	0	|	0	13	0	|	0	60	0	||	Differentially Edited	0.0596032
chr7:29222863	chr7	29222863	-	UTR	||	Kcnk6	||	11	3	3	||	0.293817	0	0.293817	||	6	13	0.461538	|	2	11	0.181818	|	5	21	0.238095	||	0	18	0	|	0	13	0	|	0	13	0	||	Differentially Edited	0.0751204
chr18:31792490	chr18	31792490	+	Intron	||	Polr2d	||	0	3	2	||	0.295238	0	0.295238	||	2	5	0.4	|	2	7	0.285714	|	1	5	0.2	||	0	0	NA	|	0	10	0	|	0	5	0	||	Differentially Edited	0.0364117
chr3:116744704	chr3	116744704	-	UTR	||	Agl	||	13	3	3	||	0.361783	0.0661376	0.295645	||	6	13	0.461538	|	10	28	0.357143	|	8	30	0.266667	||	1	18	0.0555556	|	3	21	0.142857	|	0	32	0	||	Differentially Edited	0.0159953
chr1:91392789	chr1	91392789	-	Intron	||	Ilkap	||	5	3	3	||	0.316726	0.0208333	0.295893	||	2	5	0.4	|	7	18	0.388889	|	5	31	0.16129	||	0	11	0	|	1	16	0.0625	|	0	25	0	||	Differentially Edited	0.0543057
chr2:180706021	chr2	180706021	-	Intron	||	Dido1	||	2	2	2	||	0.325397	0.0277778	0.297619	||	1	2	0.5	|	1	7	0.142857	|	3	9	0.333333	||	0	3	0	|	0	14	0	|	1	12	0.0833333	||	Differentially Edited	0.0932926
chr3:68994123	chr3	68994123	-	Exon	||	Ift80	||	14	3	3	||	0.297884	0	0.297884	||	7	14	0.5	|	7	45	0.155556	|	10	42	0.238095	||	0	14	0	|	0	30	0	|	0	48	0	||	Differentially Edited	0.103052
chr4:119175005	chr4	119175005	-	intergenic	||	NA	||	13	3	3	||	0.298643	0	0.298643	||	4	13	0.307692	|	3	17	0.176471	|	7	17	0.411765	||	0	14	0	|	0	44	0	|	0	47	0	||	Differentially Edited	0.0482309
chr8:94017815	chr8	94017815	-	UTR	||	Nudt21	||	5	3	3	||	0.29899	0	0.29899	||	1	5	0.2	|	4	11	0.363636	|	2	6	0.333333	||	0	6	0	|	0	10	0	|	0	7	0	||	Differentially Edited	0.0271155
chr7:102471904	chr7	102471904	+	intergenic	||	NA	||	5	3	3	||	0.29899	0	0.29899	||	2	6	0.333333	|	4	11	0.363636	|	1	5	0.2	||	0	6	0	|	0	7	0	|	0	17	0	||	Differentially Edited	0.0271155
chr1:133138010	chr1	133138010	+	UTR	||	Ppp1r15b	||	53	3	3	||	0.300206	0	0.300206	||	16	53	0.301887	|	26	106	0.245283	|	41	116	0.353448	||	0	54	0	|	0	62	0	|	0	158	0	||	Differentially Edited	0.0106534
chr4:140951612	chr4	140951612	+	UTR	||	Gm13031;Padi2	||	7	3	3	||	0.302171	0	0.302171	||	3	7	0.428571	|	6	17	0.352941	|	1	8	0.125	||	0	8	0	|	0	14	0	|	0	9	0	||	Differentially Edited	0.0803331
chr3:116744693	chr3	116744693	-	UTR	||	Agl	||	15	3	3	||	0.302682	0	0.302682	||	6	15	0.4	|	8	30	0.266667	|	7	29	0.241379	||	0	16	0	|	0	18	0	|	0	30	0	||	Differentially Edited	0.0254219
chr2:122031457	chr2	122031457	+	Intron	||	Eif3j1	||	2	3	2	||	0.303704	0	0.303704	||	2	5	0.4	|	2	5	0.4	|	1	9	0.111111	||	0	2	0	|	0	12	0	|	0	18	0	||	Differentially Edited	0.0875361
chr8:60973482	chr8	60973482	-	Intron	||	Clcn3	||	4	2	3	||	0.304029	0	0.304029	||	2	4	0.5	|	7	26	0.269231	|	3	21	0.142857	||	0	9	0	|	0	27	0	|	0	44	0	||	Differentially Edited	0.100717
chr5:138649848	chr5	138649848	+	Intron	||	A430033K04Rik	||	1	3	2	||	0.305556	0	0.305556	||	2	6	0.333333	|	2	6	0.333333	|	2	8	0.25	||	0	6	0	|	0	1	0	|	0	7	0	||	Differentially Edited	0.0081634
chr16:22854483	chr16	22854483	-	Intron	||	Tbccd1	||	16	3	3	||	0.306099	0	0.306099	||	7	16	0.4375	|	10	37	0.27027	|	4	19	0.210526	||	0	16	0	|	0	31	0	|	0	32	0	||	Differentially Edited	0.0458816
chr15:99728168	chr15	99728168	+	intergenic	||	NA	||	8	3	3	||	0.308566	0	0.308566	||	1	8	0.125	|	9	26	0.346154	|	5	11	0.454545	||	0	11	0	|	0	15	0	|	0	16	0	||	Differentially Edited	0.086184
chr2:126892846	chr2	126892846	-	UTR	||	Sppl2a	||	14	3	3	||	0.380471	0.071746	0.308725	||	8	22	0.363636	|	20	45	0.444444	|	12	36	0.333333	||	3	25	0.12	|	0	14	0	|	2	21	0.0952381	||	Differentially Edited	0.00344285
chr6:30483719	chr6	30483719	-	Intron	||	Tmem209	||	5	3	3	||	0.310101	0	0.310101	||	2	5	0.4	|	4	11	0.363636	|	1	6	0.166667	||	0	7	0	|	0	25	0	|	0	37	0	||	Differentially Edited	0.0505271
chr13:67473152	chr13	67473152	-	UTR	||	AC154510.1;Zfp874b	||	9	3	3	||	0.311111	0	0.311111	||	7	20	0.35	|	3	9	0.333333	|	3	12	0.25	||	0	21	0	|	0	12	0	|	0	13	0	||	Differentially Edited	0.009741
chr10:128800569	chr10	128800569	+	UTR	||	AC131081.1;Mmp19;Tmem198b	||	6	3	3	||	0.342593	0.030303	0.31229	||	4	9	0.444444	|	2	12	0.166667	|	5	12	0.416667	||	0	19	0	|	0	6	0	|	1	11	0.0909091	||	Differentially Edited	0.0589377
chr13:64290310	chr13	64290310	-	intergenic	||	Aaed1	||	37	3	3	||	0.321023	0.00680272	0.31422	||	7	37	0.189189	|	20	54	0.37037	|	23	57	0.403509	||	0	39	0	|	2	98	0.0204082	|	0	49	0	||	Differentially Edited	0.0408642
chr15:81454965	chr15	81454965	+	UTR	||	Xpnpep3	||	6	3	3	||	0.315351	0	0.315351	||	4	11	0.363636	|	2	13	0.153846	|	6	14	0.428571	||	0	12	0	|	0	6	0	|	0	9	0	||	Differentially Edited	0.062679
chr14:7937136	chr14	7937136	+	Intron	||	Flnb	||	2	2	3	||	0.9	0.584416	0.315584	||	2	2	1	|	7	10	0.7	|	10	10	1	||	6	11	0.545455	|	4	7	0.571429	|	7	11	0.636364	||	Differentially Edited	0.0785265
chr11:75176345	chr11	75176345	-	UTR	||	1700016P03Rik;Ovca2	||	9	3	3	||	0.317211	0	0.317211	||	4	13	0.307692	|	10	24	0.416667	|	5	22	0.227273	||	0	17	0	|	0	9	0	|	0	18	0	||	Differentially Edited	0.0286517
chr4:149118753	chr4	149118753	+	UTR	||	Dffa	||	3	2	2	||	0.31746	0	0.31746	||	2	6	0.333333	|	2	7	0.285714	|	1	3	0.333333	||	0	6	0	|	0	3	0	|	0	5	0	||	Differentially Edited	0.00249066
chr1:171703422	chr1	171703422	+	Intron	||	Cd48	||	7	3	3	||	0.320032	0	0.320032	||	13	32	0.40625	|	4	26	0.153846	|	12	30	0.4	||	0	7	0	|	0	18	0	|	0	10	0	||	Differentially Edited	0.0613075
chr7:102473451	chr7	102473451	+	intergenic	||	NA	||	2	3	2	||	0.320513	0	0.320513	||	2	5	0.4	|	6	13	0.461538	|	1	10	0.1	||	0	2	0	|	0	8	0	|	0	22	0	||	Differentially Edited	0.102991
chr16:32300256	chr16	32300256	+	UTR	||	Rnf168	||	54	3	3	||	0.321329	0	0.321329	||	26	66	0.393939	|	24	69	0.347826	|	12	54	0.222222	||	0	77	0	|	0	60	0	|	0	84	0	||	Differentially Edited	0.0245626
chr11:52123598	chr11	52123598	+	UTR	||	Gm26551;Ppp2ca	||	2	2	2	||	0.321429	0	0.321429	||	3	14	0.214286	|	1	2	0.5	|	3	12	0.25	||	0	3	0	|	0	13	0	|	0	16	0	||	Differentially Edited	0.0700706
chr2:122031390	chr2	122031390	+	Intron	||	Eif3j1	||	5	3	3	||	0.323158	0	0.323158	||	2	7	0.285714	|	2	9	0.222222	|	6	13	0.461538	||	0	5	0	|	0	18	0	|	0	29	0	||	Differentially Edited	0.0457199
chr8:94017337	chr8	94017337	-	intergenic	||	Nudt21	||	7	3	3	||	0.323285	0	0.323285	||	4	13	0.307692	|	6	37	0.162162	|	5	10	0.5	||	0	7	0	|	0	10	0	|	0	18	0	||	Differentially Edited	0.0806606
chr6:30483724	chr6	30483724	-	Intron	||	Tmem209	||	7	3	3	||	0.324339	0	0.324339	||	4	9	0.444444	|	1	10	0.1	|	3	7	0.428571	||	0	7	0	|	0	23	0	|	0	36	0	||	Differentially Edited	0.101832
chr16:22854553	chr16	22854553	-	Intron	||	Tbccd1	||	21	3	3	||	0.324576	0	0.324576	||	8	25	0.32	|	11	28	0.392857	|	6	23	0.26087	||	0	21	0	|	0	23	0	|	0	32	0	||	Differentially Edited	0.0135494
chr6:66540126	chr6	66540126	+	UTR	||	Mad2l1	||	27	3	3	||	0.325708	0	0.325708	||	20	44	0.454545	|	23	89	0.258427	|	14	53	0.264151	||	0	42	0	|	0	27	0	|	0	57	0	||	Differentially Edited	0.0369852
chr11:68985937	chr11	68985937	-	UTR	||	Pfas	||	21	3	3	||	0.326575	0	0.326575	||	3	21	0.142857	|	10	31	0.322581	|	18	35	0.514286	||	0	27	0	|	0	48	0	|	0	43	0	||	Differentially Edited	0.0930308
chr3:116744694	chr3	116744694	-	UTR	||	Agl	||	13	3	3	||	0.326686	0	0.326686	||	6	13	0.461538	|	10	30	0.333333	|	5	27	0.185185	||	0	14	0	|	0	18	0	|	0	31	0	||	Differentially Edited	0.0548666
chr16:22854532	chr16	22854532	-	Intron	||	Tbccd1	||	16	3	3	||	0.32684	0	0.32684	||	9	22	0.409091	|	9	28	0.321429	|	5	20	0.25	||	0	16	0	|	0	30	0	|	0	32	0	||	Differentially Edited	0.0192427
chr9:96555754	chr9	96555754	-	Intron	||	Rasa2	||	5	3	3	||	0.328042	0	0.328042	||	3	7	0.428571	|	1	9	0.111111	|	4	9	0.444444	||	0	6	0	|	0	5	0	|	0	8	0	||	Differentially Edited	0.0942871
chr6:66540269	chr6	66540269	+	UTR	||	Mad2l1	||	30	3	3	||	0.330252	0	0.330252	||	33	76	0.434211	|	24	85	0.282353	|	17	62	0.274194	||	0	55	0	|	0	30	0	|	0	62	0	||	Differentially Edited	0.0239355
chr16:32300246	chr16	32300246	+	UTR	||	Rnf168	||	46	3	3	||	0.342306	0.0119048	0.330401	||	18	57	0.315789	|	24	59	0.40678	|	14	46	0.304348	||	0	81	0	|	2	56	0.0357143	|	0	71	0	||	Differentially Edited	0.00472978
chr7:55977253	chr7	55977253	-	Intron	||	A230056P14Rik	||	0	3	2	||	0.330857	0	0.330857	||	9	17	0.529412	|	5	19	0.263158	|	1	5	0.2	||	0	10	0	|	0	0	NA	|	0	9	0	||	Differentially Edited	0.0818143
chr7:97098467	chr7	97098467	+	Intron	||	Gab2	||	20	3	3	||	0.370367	0.0394336	0.330933	||	12	25	0.48	|	7	39	0.179487	|	14	31	0.451613	||	0	20	0	|	4	45	0.0888889	|	1	34	0.0294118	||	Differentially Edited	0.065612
chr5:125457477	chr5	125457477	+	UTR	||	Bri3bp	||	11	3	3	||	0.331089	0	0.331089	||	4	11	0.363636	|	9	27	0.333333	|	8	27	0.296296	||	0	17	0	|	0	15	0	|	0	24	0	||	Differentially Edited	0.00344093
chr8:106214772	chr8	106214772	+	Intron	||	Prmt7	||	1	3	2	||	0.331349	0	0.331349	||	2	7	0.285714	|	3	8	0.375	|	3	9	0.333333	||	0	6	0	|	0	8	0	|	0	1	0	||	Differentially Edited	0.00600521
chr2:119104919	chr2	119104919	+	UTR	||	Knl1	||	39	3	3	||	0.331504	0	0.331504	||	14	39	0.358974	|	40	142	0.28169	|	46	130	0.353846	||	0	80	0	|	0	117	0	|	0	153	0	||	Differentially Edited	0.00561716
chr6:66540283	chr6	66540283	+	UTR	||	Mad2l1	||	28	3	3	||	0.334505	0	0.334505	||	24	68	0.352941	|	31	81	0.382716	|	15	56	0.267857	||	0	55	0	|	0	28	0	|	0	60	0	||	Differentially Edited	0.0104195
chr7:29222844	chr7	29222844	-	UTR	||	Kcnk6	||	13	3	3	||	0.335775	0	0.335775	||	4	13	0.307692	|	6	13	0.461538	|	5	21	0.238095	||	0	18	0	|	0	15	0	|	0	14	0	||	Differentially Edited	0.0365456
chrX:150985523	chrX	150985523	-	UTR	||	Gnl3l	||	32	3	3	||	0.339307	0	0.339307	||	11	35	0.314286	|	12	33	0.363636	|	17	50	0.34	||	0	32	0	|	0	61	0	|	0	65	0	||	Differentially Edited	0.00175925
chr2:91213286	chr2	91213286	+	UTR	||	Acp2;Ddb2	||	13	3	3	||	0.341453	0	0.341453	||	4	13	0.307692	|	9	20	0.45	|	4	15	0.266667	||	0	18	0	|	0	35	0	|	0	36	0	||	Differentially Edited	0.0254612
chr8:60974348	chr8	60974348	-	Intron	||	Clcn3	||	7	3	3	||	0.343915	0	0.343915	||	3	7	0.428571	|	7	18	0.388889	|	6	28	0.214286	||	0	9	0	|	0	38	0	|	0	64	0	||	Differentially Edited	0.0347303
chr2:91213287	chr2	91213287	+	UTR	||	Acp2;Ddb2	||	13	3	3	||	0.343986	0	0.343986	||	4	13	0.307692	|	7	17	0.411765	|	5	16	0.3125	||	0	18	0	|	0	34	0	|	0	35	0	||	Differentially Edited	0.00958297
chr2:154586335	chr2	154586335	-	UTR	||	Pxmp4	||	5	3	3	||	0.34632	0	0.34632	||	3	11	0.272727	|	9	22	0.409091	|	5	14	0.357143	||	0	5	0	|	0	12	0	|	0	11	0	||	Differentially Edited	0.0129097
chr16:32300332	chr16	32300332	+	UTR	||	Rnf168	||	76	3	3	||	0.353499	0.00533333	0.348166	||	26	81	0.320988	|	32	104	0.307692	|	38	88	0.431818	||	0	96	0	|	0	76	0	|	2	125	0.016	||	Differentially Edited	0.011404
chr6:108426057	chr6	108426057	+	Intron	||	Itpr1	||	2	2	2	||	0.35	0	0.35	||	1	2	0.5	|	3	20	0.15	|	2	5	0.4	||	0	7	0	|	0	14	0	|	0	3	0	||	Differentially Edited	0.0782023
chr17:24176191	chr17	24176191	-	UTR	||	Gm43796;Tbc1d24	||	2	2	3	||	0.35049	0	0.35049	||	1	2	0.5	|	3	17	0.176471	|	6	16	0.375	||	0	7	0	|	0	24	0	|	0	21	0	||	Differentially Edited	0.0652397
chr1:191830086	chr1	191830086	+	Intron	||	Nek2	||	8	3	3	||	0.37312	0.0208333	0.352287	||	3	8	0.375	|	12	28	0.428571	|	6	19	0.315789	||	1	16	0.0625	|	0	24	0	|	0	36	0	||	Differentially Edited	0.00166114
chr5:125456605	chr5	125456605	+	UTR	||	Bri3bp	||	5	3	3	||	0.357018	0	0.357018	||	8	19	0.421053	|	9	20	0.45	|	1	5	0.2	||	0	14	0	|	0	15	0	|	0	8	0	||	Differentially Edited	0.0455865
chr2:121543758	chr2	121543758	+	UTR	||	Wdr76	||	28	3	3	||	0.357533	0	0.357533	||	10	28	0.357143	|	28	87	0.321839	|	37	94	0.393617	||	0	40	0	|	0	71	0	|	0	86	0	||	Differentially Edited	0.00334215
chr1:136321095	chr1	136321095	-	Intron	||	Camsap2	||	4	2	3	||	0.358242	0	0.358242	||	2	4	0.5	|	9	26	0.346154	|	8	35	0.228571	||	0	14	0	|	0	16	0	|	0	35	0	||	Differentially Edited	0.0449064
chr13:67473146	chr13	67473146	-	UTR	||	AC154510.1;Zfp874b	||	9	3	3	||	0.361111	0	0.361111	||	4	16	0.25	|	3	9	0.333333	|	7	14	0.5	||	0	20	0	|	0	13	0	|	0	11	0	||	Differentially Edited	0.0390123
chr2:121543632	chr2	121543632	+	UTR	||	Wdr76	||	24	3	3	||	0.362441	0	0.362441	||	11	24	0.458333	|	11	39	0.282051	|	17	49	0.346939	||	0	41	0	|	0	41	0	|	0	67	0	||	Differentially Edited	0.0195802
chr2:121543262	chr2	121543262	+	UTR	||	Wdr76	||	59	3	3	||	0.364699	0	0.364699	||	32	59	0.542373	|	35	116	0.301724	|	22	88	0.25	||	0	69	0	|	0	84	0	|	0	133	0	||	Differentially Edited	0.0559416
chr10:93254078	chr10	93254078	+	Intron	||	Cdk17;Elk3	||	2	2	2	||	0.366667	0	0.366667	||	1	2	0.5	|	1	5	0.2	|	2	5	0.4	||	0	10	0	|	0	4	0	|	0	6	0	||	Differentially Edited	0.0532707
chr2:120601792	chr2	120601792	+	intergenic	||	NA	||	12	3	3	||	0.439169	0.071644	0.367525	||	5	12	0.416667	|	13	35	0.371429	|	9	17	0.529412	||	3	17	0.176471	|	0	33	0	|	1	26	0.0384615	||	Differentially Edited	0.00702185
chr4:155621903	chr4	155621903	+	UTR	||	Gm10563;Gm16023;Slc35e2	||	25	3	3	||	0.385142	0.0151515	0.36999	||	11	25	0.44	|	16	47	0.340426	|	30	80	0.375	||	2	44	0.0454545	|	0	90	0	|	0	90	0	||	Differentially Edited	0.00149456
chr2:132309633	chr2	132309633	+	UTR	||	Cds2	||	10	3	3	||	0.372433	0	0.372433	||	8	17	0.470588	|	11	49	0.22449	|	19	45	0.422222	||	0	10	0	|	0	38	0	|	0	60	0	||	Differentially Edited	0.0385098
chr7:55977220	chr7	55977220	-	Intron	||	A230056P14Rik	||	0	3	2	||	0.373427	0	0.373427	||	2	11	0.181818	|	7	13	0.538462	|	2	5	0.4	||	0	8	0	|	0	0	NA	|	0	8	0	||	Differentially Edited	0.0693361
chr6:66540212	chr6	66540212	+	UTR	||	Mad2l1	||	22	3	3	||	0.373505	0	0.373505	||	30	59	0.508475	|	28	91	0.307692	|	14	46	0.304348	||	0	50	0	|	0	22	0	|	0	63	0	||	Differentially Edited	0.031135
chr2:34823396	chr2	34823396	-	Intron	||	Fbxw2	||	8	3	3	||	0.387147	0.0119048	0.375242	||	5	8	0.625	|	11	59	0.186441	|	7	20	0.35	||	0	11	0	|	2	56	0.0357143	|	0	37	0	||	Differentially Edited	0.0980164
chr13:49532156	chr13	49532156	-	UTR	||	Cenpp;Ecm2	||	8	3	3	||	0.37724	0	0.37724	||	7	12	0.583333	|	8	31	0.258065	|	9	31	0.290323	||	0	8	0	|	0	19	0	|	0	28	0	||	Differentially Edited	0.0676778
chr14:31700663	chr14	31700663	-	UTR	||	Ankrd28	||	53	3	3	||	0.426475	0.0475058	0.378969	||	35	53	0.660377	|	22	77	0.285714	|	19	57	0.333333	||	9	76	0.118421	|	0	73	0	|	2	83	0.0240964	||	Differentially Edited	0.0736323
chr6:66540215	chr6	66540215	+	UTR	||	Mad2l1	||	21	3	3	||	0.379259	0	0.379259	||	32	60	0.533333	|	31	90	0.344444	|	13	50	0.26	||	0	49	0	|	0	21	0	|	0	61	0	||	Differentially Edited	0.0425172
chr6:57810014	chr6	57810014	-	Intron	||	Vopp1	||	17	3	3	||	0.380829	0	0.380829	||	10	17	0.588235	|	17	71	0.239437	|	17	54	0.314815	||	0	30	0	|	0	62	0	|	0	69	0	||	Differentially Edited	0.0694489
chr3:116744096	chr3	116744096	-	UTR	||	Agl	||	15	3	3	||	0.382926	0	0.382926	||	7	15	0.466667	|	8	29	0.275862	|	13	32	0.40625	||	0	18	0	|	0	17	0	|	0	19	0	||	Differentially Edited	0.0209411
chr12:70994629	chr12	70994629	+	UTR	||	3110056K07Rik;Psma3	||	24	3	3	||	0.42963	0.0460317	0.383598	||	13	30	0.433333	|	16	45	0.355556	|	22	44	0.5	||	2	28	0.0714286	|	0	24	0	|	2	30	0.0666667	||	Differentially Edited	0.00348606
chrX:56587643	chrX	56587643	-	UTR	||	Mmgt1	||	40	3	3	||	0.385307	0	0.385307	||	17	40	0.425	|	21	57	0.368421	|	29	80	0.3625	||	0	74	0	|	0	62	0	|	0	84	0	||	Differentially Edited	0.00266211
chr7:80241948	chr7	80241948	+	intergenic	||	Gdpgp1	||	5	3	2	||	0.387302	0	0.387302	||	2	6	0.333333	|	4	10	0.4	|	6	14	0.428571	||	NA	NA	NA	|	0	11	0	|	0	5	0	||	Differentially Edited	0.00526583
chr8:94017315	chr8	94017315	-	intergenic	||	Nudt21	||	10	3	3	||	0.5	0.110826	0.389174	||	10	15	0.666667	|	13	39	0.333333	|	5	10	0.5	||	2	10	0.2	|	1	13	0.0769231	|	1	18	0.0555556	||	Differentially Edited	0.038615
chr2:119107353	chr2	119107353	+	intergenic	||	NA	||	5	3	3	||	0.392337	0	0.392337	||	2	5	0.4	|	9	29	0.310345	|	7	15	0.466667	||	0	6	0	|	0	13	0	|	0	34	0	||	Differentially Edited	0.0130642
chr18:56956559	chr18	56956559	-	UTR	||	C330018D20Rik	||	1	3	2	||	0.393275	0	0.393275	||	6	9	0.666667	|	5	19	0.263158	|	4	16	0.25	||	0	7	0	|	0	1	0	|	0	14	0	||	Differentially Edited	0.10263
chr15:81456160	chr15	81456160	+	UTR	||	Xpnpep3	||	10	3	3	||	0.394444	0	0.394444	||	4	10	0.4	|	7	12	0.583333	|	2	10	0.2	||	0	21	0	|	0	21	0	|	0	17	0	||	Differentially Edited	0.0705246
chr16:22854443	chr16	22854443	-	Intron	||	Tbccd1	||	18	3	3	||	0.39619	0	0.39619	||	9	21	0.428571	|	16	40	0.4	|	9	25	0.36	||	0	18	0	|	0	27	0	|	0	33	0	||	Differentially Edited	0.00250993
chr16:32299847	chr16	32299847	+	UTR	||	Rnf168	||	46	3	3	||	0.397268	0	0.397268	||	20	46	0.434783	|	27	91	0.296703	|	29	63	0.460317	||	0	86	0	|	0	79	0	|	0	108	0	||	Differentially Edited	0.0159733
chr5:143014643	chr5	143014643	-	Intron	||	Rnf216	||	6	3	3	||	0.4	0	0.4	||	5	8	0.625	|	2	10	0.2	|	3	8	0.375	||	0	6	0	|	0	6	0	|	0	9	0	||	Differentially Edited	0.0833416
chr5:125457476	chr5	125457476	+	UTR	||	Bri3bp	||	13	3	3	||	0.401709	0	0.401709	||	7	13	0.538462	|	8	27	0.296296	|	10	27	0.37037	||	0	18	0	|	0	16	0	|	0	24	0	||	Differentially Edited	0.0303647
chr10:78186086	chr10	78186086	-	intergenic	||	NA	||	5	3	3	||	0.404545	0	0.404545	||	3	5	0.6	|	4	16	0.25	|	4	11	0.363636	||	0	14	0	|	0	5	0	|	0	8	0	||	Differentially Edited	0.0592232
chr16:32299853	chr16	32299853	+	UTR	||	Rnf168	||	45	3	3	||	0.412271	0.00617284	0.406098	||	21	45	0.466667	|	28	95	0.294737	|	29	61	0.47541	||	0	87	0	|	0	80	0	|	2	108	0.0185185	||	Differentially Edited	0.0194151
chr1:134465327	chr1	134465327	+	Exon	||	Klhl12	||	6	3	3	||	0.406285	0	0.406285	||	4	6	0.666667	|	10	27	0.37037	|	4	22	0.181818	||	0	11	0	|	0	32	0	|	0	41	0	||	Differentially Edited	0.10243
chr1:134484857	chr1	134484857	+	Intron	||	Klhl12	||	4	3	2	||	0.407359	0	0.407359	||	3	10	0.3	|	4	14	0.285714	|	7	11	0.636364	||	0	4	0	|	0	10	0	|	0	15	0	||	Differentially Edited	0.0708107
chr14:31093394	chr14	31093394	+	Intron	||	Pbrm1;Smim4	||	1	2	2	||	0.407407	0	0.407407	||	2	4	0.5	|	4	8	0.5	|	2	9	0.222222	||	0	1	0	|	0	9	0	|	0	8	0	||	Differentially Edited	0.0479669
chr2:5019726	chr2	5019726	-	intergenic	||	NA	||	9	3	3	||	0.407843	0	0.407843	||	6	15	0.4	|	5	17	0.294118	|	9	17	0.529412	||	0	9	0	|	0	15	0	|	0	29	0	||	Differentially Edited	0.0267188
chr10:78186075	chr10	78186075	-	intergenic	||	NA	||	4	2	2	||	0.410053	0	0.410053	||	2	4	0.5	|	4	14	0.285714	|	4	9	0.444444	||	0	13	0	|	0	4	0	|	0	6	0	||	Differentially Edited	0.0236499
chr4:21834548	chr4	21834548	+	UTR	||	Usp45	||	29	3	3	||	0.410065	0	0.410065	||	12	29	0.413793	|	17	43	0.395349	|	16	38	0.421053	||	0	45	0	|	0	30	0	|	0	55	0	||	Differentially Edited	0.000347906
chr14:99049294	chr14	99049294	+	Intron	||	Bora	||	2	2	2	||	0.412121	0	0.412121	||	1	2	0.5	|	9	15	0.6	|	3	22	0.136364	||	0	4	0	|	0	24	0	|	0	23	0	||	Differentially Edited	0.0996733
chr12:70995210	chr12	70995210	+	UTR	||	3110056K07Rik;Psma3	||	25	3	3	||	0.412458	0	0.412458	||	15	25	0.6	|	8	31	0.258065	|	11	29	0.37931	||	0	29	0	|	0	49	0	|	0	29	0	||	Differentially Edited	0.0541487
chr3:116629563	chr3	116629563	+	UTR	||	Gm42893;Sass6	||	5	3	3	||	0.414983	0	0.414983	||	5	9	0.555556	|	10	24	0.416667	|	3	11	0.272727	||	0	14	0	|	0	5	0	|	0	22	0	||	Differentially Edited	0.0366002
chr4:116552787	chr4	116552787	-	UTR	||	Tmem69	||	9	3	3	||	0.415657	0	0.415657	||	7	15	0.466667	|	8	22	0.363636	|	5	12	0.416667	||	0	21	0	|	0	9	0	|	0	23	0	||	Differentially Edited	0.00508257
chr7:110775845	chr7	110775845	+	Intron	||	Ampd3	||	5	3	3	||	0.41627	0	0.41627	||	3	5	0.6	|	7	24	0.291667	|	5	14	0.357143	||	0	5	0	|	0	5	0	|	0	23	0	||	Differentially Edited	0.0471991
chr9:73013566	chr9	73013566	+	UTR	||	Ccpg1;Gm44503;Pigb	||	16	3	3	||	0.419286	0	0.419286	||	10	16	0.625	|	6	25	0.24	|	11	28	0.392857	||	0	25	0	|	0	24	0	|	0	47	0	||	Differentially Edited	0.0644437
chr1:156428031	chr1	156428031	-	UTR	||	Soat1	||	18	3	3	||	0.420106	0	0.420106	||	10	18	0.555556	|	13	35	0.371429	|	6	18	0.333333	||	0	21	0	|	0	47	0	|	0	47	0	||	Differentially Edited	0.0256517
chr8:72478916	chr8	72478916	-	intergenic	||	NA	||	5	3	3	||	0.420455	0	0.420455	||	5	8	0.625	|	2	11	0.181818	|	5	11	0.454545	||	0	5	0	|	0	11	0	|	0	10	0	||	Differentially Edited	0.0827073
chr4:116552812	chr4	116552812	-	UTR	||	Tmem69	||	10	3	3	||	0.424242	0	0.424242	||	8	16	0.5	|	6	22	0.272727	|	7	14	0.5	||	0	22	0	|	0	10	0	|	0	19	0	||	Differentially Edited	0.0304393
chr2:121544339	chr2	121544339	+	UTR	||	Wdr76	||	13	3	3	||	0.427853	0	0.427853	||	7	13	0.538462	|	9	27	0.333333	|	7	17	0.411765	||	0	25	0	|	0	37	0	|	0	46	0	||	Differentially Edited	0.0189555
chr5:143014644	chr5	143014644	-	Intron	||	Rnf216	||	6	3	3	||	0.428042	0	0.428042	||	5	9	0.555556	|	3	10	0.3	|	3	7	0.428571	||	0	6	0	|	0	6	0	|	0	9	0	||	Differentially Edited	0.0284432
chr16:22854597	chr16	22854597	-	Intron	||	Tbccd1	||	17	3	3	||	0.43073	0	0.43073	||	10	22	0.454545	|	11	29	0.37931	|	11	24	0.458333	||	0	17	0	|	0	23	0	|	0	32	0	||	Differentially Edited	0.00355019
chr8:94017311	chr8	94017311	-	intergenic	||	Nudt21	||	10	3	3	||	0.431624	0	0.431624	||	6	13	0.461538	|	10	40	0.25	|	7	12	0.583333	||	0	10	0	|	0	13	0	|	0	16	0	||	Differentially Edited	0.0473182
chr4:116552817	chr4	116552817	-	UTR	||	Tmem69	||	9	3	3	||	0.435287	0	0.435287	||	9	18	0.5	|	4	21	0.190476	|	8	13	0.615385	||	0	22	0	|	0	9	0	|	0	20	0	||	Differentially Edited	0.0754463
chr17:33928557	chr17	33928557	+	UTR	||	Tapbp	||	53	3	3	||	0.450045	0.00529101	0.444754	||	29	53	0.54717	|	43	105	0.409524	|	24	61	0.393443	||	0	69	0	|	1	63	0.015873	|	0	77	0	||	Differentially Edited	0.0111073
chr4:116552915	chr4	116552915	-	UTR	||	Tmem69	||	7	3	3	||	0.445378	0	0.445378	||	7	17	0.411765	|	6	17	0.352941	|	4	7	0.571429	||	0	17	0	|	0	11	0	|	0	12	0	||	Differentially Edited	0.0208105
chr6:66540281	chr6	66540281	+	UTR	||	Mad2l1	||	30	3	3	||	0.452523	0	0.452523	||	38	71	0.535211	|	36	82	0.439024	|	23	60	0.383333	||	0	55	0	|	0	30	0	|	0	60	0	||	Differentially Edited	0.00947312
chr12:8750269	chr12	8750269	+	UTR	||	Pum2	||	39	3	3	||	0.460878	0.00387597	0.457002	||	19	39	0.487179	|	30	55	0.545455	|	21	60	0.35	||	0	56	0	|	1	86	0.0116279	|	0	68	0	||	Differentially Edited	0.0153633
chr2:36254896	chr2	36254896	+	intergenic	||	NA	||	2	3	2	||	0.553571	0.0909091	0.462662	||	5	8	0.625	|	2	8	0.25	|	11	14	0.785714	||	0	2	0	|	3	11	0.272727	|	0	18	0	||	Differentially Edited	0.0806128
chr1:181254740	chr1	181254740	-	intergenic	||	NA	||	3	2	2	||	0.462963	0	0.462963	||	2	4	0.5	|	2	9	0.222222	|	4	6	0.666667	||	0	3	0	|	0	11	0	|	0	11	0	||	Differentially Edited	0.07024
chr5:113087834	chr5	113087834	-	UTR	||	2900026A02Rik	||	2	2	2	||	0.518519	0.0555556	0.462963	||	2	3	0.666667	|	7	18	0.388889	|	11	22	0.5	||	0	5	0	|	1	6	0.166667	|	0	2	0	||	Differentially Edited	0.0122012
chr5:125456927	chr5	125456927	+	UTR	||	Bri3bp	||	6	3	3	||	0.467033	0	0.467033	||	3	6	0.5	|	8	13	0.615385	|	4	14	0.285714	||	0	15	0	|	0	11	0	|	0	17	0	||	Differentially Edited	0.0402065
chr2:69872352	chr2	69872352	+	Intron	||	Mettl5	||	1	2	2	||	0.468254	0	0.468254	||	3	6	0.5	|	1	3	0.333333	|	4	7	0.571429	||	0	1	0	|	0	12	0	|	0	10	0	||	Differentially Edited	0.0219502
chr4:124779467	chr4	124779467	+	Intron	||	Inpp5b	||	7	3	3	||	0.488834	0.0185185	0.470316	||	11	17	0.647059	|	8	18	0.444444	|	3	8	0.375	||	0	7	0	|	0	15	0	|	1	18	0.0555556	||	Differentially Edited	0.0241534
chr2:5020002	chr2	5020002	-	intergenic	||	NA	||	4	3	2	||	0.474573	0	0.474573	||	4	8	0.5	|	10	33	0.30303	|	18	29	0.62069	||	0	4	0	|	0	7	0	|	0	15	0	||	Differentially Edited	0.0360113
chr15:97867664	chr15	97867664	-	Intron	||	Vdr	||	3	2	2	||	0.555556	0.0804598	0.475096	||	12	22	0.545455	|	2	3	0.666667	|	5	11	0.454545	||	7	29	0.241379	|	0	4	0	|	0	5	0	||	Differentially Edited	0.0109933
chr9:83838870	chr9	83838870	+	Intron	||	Ttk	||	0	3	2	||	0.477778	0	0.477778	||	7	10	0.7	|	6	15	0.4	|	6	18	0.333333	||	0	0	NA	|	0	10	0	|	0	16	0	||	Differentially Edited	0.0514449
chr2:132309880	chr2	132309880	+	UTR	||	Cds2	||	18	3	3	||	0.528889	0.0499487	0.47894	||	16	30	0.533333	|	34	75	0.453333	|	33	55	0.6	||	2	18	0.111111	|	1	42	0.0238095	|	1	67	0.0149254	||	Differentially Edited	0.00121168
chr2:5019727	chr2	5019727	-	intergenic	||	NA	||	9	3	3	||	0.482319	0	0.482319	||	7	13	0.538462	|	6	17	0.352941	|	10	18	0.555556	||	0	9	0	|	0	13	0	|	0	29	0	||	Differentially Edited	0.0176164
chr3:116629562	chr3	116629562	+	UTR	||	Gm42893;Sass6	||	4	3	2	||	0.482323	0	0.482323	||	6	8	0.75	|	8	24	0.333333	|	4	11	0.363636	||	0	14	0	|	0	4	0	|	0	20	0	||	Differentially Edited	0.0693771
chr2:5019731	chr2	5019731	-	intergenic	||	NA	||	9	3	3	||	0.483553	0	0.483553	||	11	16	0.6875	|	5	19	0.263158	|	9	18	0.5	||	0	9	0	|	0	11	0	|	0	27	0	||	Differentially Edited	0.0588325
chr4:116552908	chr4	116552908	-	UTR	||	Tmem69	||	6	3	3	||	0.49113	0	0.49113	||	8	14	0.571429	|	4	17	0.235294	|	4	6	0.666667	||	0	18	0	|	0	11	0	|	0	10	0	||	Differentially Edited	0.064211
chr16:32300268	chr16	32300268	+	UTR	||	Rnf168	||	50	3	3	||	0.496581	0	0.496581	||	28	60	0.466667	|	34	65	0.523077	|	25	50	0.5	||	0	71	0	|	0	58	0	|	0	86	0	||	Differentially Edited	0.00108544
chr6:66540270	chr6	66540270	+	UTR	||	Mad2l1	||	30	3	3	||	0.500655	0	0.500655	||	42	69	0.608696	|	41	81	0.506173	|	24	62	0.387097	||	0	57	0	|	0	30	0	|	0	63	0	||	Differentially Edited	0.0159656
chr6:87578011	chr6	87578011	-	intergenic	||	NA	||	4	3	2	||	0.508889	0	0.508889	||	8	12	0.666667	|	9	25	0.36	|	3	6	0.5	||	0	8	0	|	0	4	0	|	0	10	0	||	Differentially Edited	0.0290245
chr9:65906717	chr9	65906717	+	Intron	||	Trip4	||	6	3	3	||	0.562958	0.0512821	0.511676	||	5	6	0.833333	|	9	31	0.290323	|	39	69	0.565217	||	2	13	0.153846	|	0	61	0	|	0	128	0	||	Differentially Edited	0.0704878
chr3:96632713	chr3	96632713	+	UTR	||	Rbm8a	||	7	3	3	||	0.511905	0	0.511905	||	8	12	0.666667	|	7	12	0.583333	|	2	7	0.285714	||	0	27	0	|	0	10	0	|	0	21	0	||	Differentially Edited	0.0474191
chr9:98333520	chr9	98333520	+	Intron	||	Nmnat3	||	11	3	3	||	0.51581	0	0.51581	||	7	11	0.636364	|	21	46	0.456522	|	20	44	0.454545	||	0	11	0	|	0	36	0	|	0	92	0	||	Differentially Edited	0.0133835
chr12:112958189	chr12	112958189	-	intergenic	||	NA	||	6	3	3	||	0.518038	0	0.518038	||	5	6	0.833333	|	12	33	0.363636	|	10	28	0.357143	||	0	13	0	|	0	25	0	|	0	39	0	||	Differentially Edited	0.0814643
chr3:122856281	chr3	122856281	+	UTR	||	Pde5a	||	4	3	2	||	0.520707	0	0.520707	||	8	12	0.666667	|	6	11	0.545455	|	7	20	0.35	||	0	4	0	|	0	9	0	|	0	5	0	||	Differentially Edited	0.0299807
chr11:59458314	chr11	59458314	+	UTR	||	Jmjd4	||	6	3	3	||	0.521429	0	0.521429	||	4	6	0.666667	|	11	35	0.314286	|	7	12	0.583333	||	0	7	0	|	0	15	0	|	0	13	0	||	Differentially Edited	0.0391563
chr11:59458313	chr11	59458313	+	UTR	||	Jmjd4	||	6	3	3	||	0.574409	0.047619	0.52679	||	4	6	0.666667	|	15	34	0.441176	|	8	13	0.615385	||	1	7	0.142857	|	0	15	0	|	0	13	0	||	Differentially Edited	0.00462165
chr9:65904096	chr9	65904096	+	Intron	||	Trip4	||	1	2	2	||	0.527407	0	0.527407	||	2	3	0.666667	|	5	9	0.555556	|	9	25	0.36	||	0	1	0	|	0	27	0	|	0	57	0	||	Differentially Edited	0.0276925
chr14:31043365	chr14	31043365	+	Intron	||	Pbrm1	||	1	2	2	||	0.533333	0	0.533333	||	1	3	0.333333	|	3	5	0.6	|	6	9	0.666667	||	0	1	0	|	0	6	0	|	0	5	0	||	Differentially Edited	0.0345784
chr3:116744084	chr3	116744084	-	UTR	||	Agl	||	18	3	3	||	0.549939	0	0.549939	||	10	19	0.526316	|	18	31	0.580645	|	19	35	0.542857	||	0	20	0	|	0	18	0	|	0	21	0	||	Differentially Edited	0.000853682
chr18:56956560	chr18	56956560	-	UTR	||	C330018D20Rik	||	1	3	2	||	0.556115	0	0.556115	||	5	8	0.625	|	12	19	0.631579	|	7	17	0.411765	||	0	6	0	|	0	1	0	|	0	15	0	||	Differentially Edited	0.0164411
chr11:75176344	chr11	75176344	-	UTR	||	1700016P03Rik;Ovca2	||	8	3	3	||	0.562112	0	0.562112	||	9	14	0.642857	|	14	23	0.608696	|	10	23	0.434783	||	0	16	0	|	0	8	0	|	0	16	0	||	Differentially Edited	0.0128823
chr6:135220604	chr6	135220604	+	Intron	||	Fam234b	||	7	3	3	||	0.570899	0	0.570899	||	5	9	0.555556	|	3	10	0.3	|	6	7	0.857143	||	0	10	0	|	0	12	0	|	0	23	0	||	Differentially Edited	0.0711599
chr9:37340058	chr9	37340058	-	Intron	||	Ccdc15	||	3	2	2	||	0.583333	0	0.583333	||	2	3	0.666667	|	9	12	0.75	|	4	12	0.333333	||	0	4	0	|	0	11	0	|	0	6	0	||	Differentially Edited	0.0444669
chr11:75300578	chr11	75300578	-	UTR	||	Rpa1	||	198	3	3	||	0.614618	0.0168351	0.597783	||	151	234	0.645299	|	130	232	0.560345	|	157	246	0.638211	||	8	329	0.0243161	|	3	198	0.0151515	|	5	453	0.0110375	||	Differentially Edited	0.00172507
chr18:65477077	chr18	65477077	+	UTR	||	Malt1	||	15	3	3	||	0.617182	0	0.617182	||	11	15	0.733333	|	29	63	0.460317	|	25	38	0.657895	||	0	24	0	|	0	25	0	|	0	27	0	||	Differentially Edited	0.0169536
chr5:129718757	chr5	129718757	+	UTR	||	Mrps17	||	4	2	3	||	0.62963	0	0.62963	||	4	4	1	|	8	18	0.444444	|	4	9	0.444444	||	0	5	0	|	0	18	0	|	0	15	0	||	Differentially Edited	0.0766867
chr14:21796764	chr14	21796764	+	UTR	||	Samd8	||	4	2	3	||	0.6829	0	0.6829	||	3	4	0.75	|	8	14	0.571429	|	8	11	0.727273	||	0	8	0	|	0	10	0	|	0	7	0	||	Differentially Edited	0.00668589
chr11:101037176	chr11	101037176	+	Intron	||	Atp6v0a1	||	7	3	3	||	0.691667	0	0.691667	||	7	10	0.7	|	6	8	0.75	|	5	8	0.625	||	0	7	0	|	0	10	0	|	0	12	0	||	Differentially Edited	0.00274666
chr17:46499925	chr17	46499925	+	Intron	||	Gm26904	||	1	2	3	||	0.700337	0	0.700337	||	5	9	0.555556	|	6	11	0.545455	|	1	1	1	||	0	23	0	|	0	22	0	|	0	8	0	||	Differentially Edited	0.042866
chr11:75301015	chr11	75301015	-	UTR	||	Rpa1	||	202	3	3	||	0.725865	0.0244069	0.701458	||	212	290	0.731034	|	174	234	0.74359	|	213	303	0.70297	||	9	351	0.025641	|	4	202	0.019802	|	12	432	0.0277778	||	Differentially Edited	0.000179091
chr9:72475113	chr9	72475113	-	Exon	||	Tex9	||	6	3	3	||	0.803704	0.0833333	0.72037	||	7	9	0.777778	|	5	6	0.833333	|	20	25	0.8	||	3	12	0.25	|	0	8	0	|	0	16	0	||	Differentially Edited	0.0108877
chr9:65904037	chr9	65904037	+	Intron	||	Trip4	||	2	2	2	||	0.7228	0	0.7228	||	2	2	1	|	5	13	0.384615	|	29	37	0.783784	||	0	3	0	|	0	32	0	|	0	68	0	||	Differentially Edited	0.0569269
chr9:65904017	chr9	65904017	+	Intron	||	Trip4	||	1	2	3	||	0.725198	0	0.725198	||	1	1	1	|	7	16	0.4375	|	31	42	0.738095	||	0	5	0	|	0	38	0	|	0	85	0	||	Differentially Edited	0.0467238
chr14:86911716	chr14	86911716	-	Intron	||	Diaph3	||	8	3	3	||	0.771886	0	0.771886	||	7	9	0.777778	|	14	24	0.583333	|	21	22	0.954545	||	0	8	0	|	0	17	0	|	0	34	0	||	Differentially Edited	0.0187472
chr4:62299691	chr4	62299691	-	intergenic	||	NA	||	1	2	2	||	0.349903	0	0.349903	||	1	2	0.5	|	4	9	0.444444	|	2	19	0.105263	||	0	1	0	|	0	11	0	|	0	11	0	||	Unmodulated	0.105078
chr1:160053235	chr1	160053235	+	Intron	||	4930523C07Rik	||	0	2	2	||	0.171429	0	0.171429	||	0	0	NA	|	1	7	0.142857	|	1	5	0.2	||	0	1	0	|	0	8	0	|	0	9	0	||	Unmodulated	0.105137
chr6:92148944	chr6	92148944	+	Intron	||	Nr2c2	||	9	3	3	||	0.225885	0.0805153	0.14537	||	4	21	0.190476	|	4	26	0.153846	|	4	12	0.333333	||	1	9	0.111111	|	0	16	0	|	3	23	0.130435	||	Unmodulated	0.105768
chr9:73096679	chr9	73096679	+	UTR	||	Rab27a	||	34	3	3	||	0.107308	0	0.107308	||	6	34	0.176471	|	2	44	0.0454545	|	6	60	0.1	||	0	55	0	|	0	52	0	|	0	89	0	||	Unmodulated	0.105846
chr8:94017880	chr8	94017880	-	UTR	||	Nudt21	||	8	3	3	||	0.21976	0	0.21976	||	3	8	0.375	|	4	26	0.153846	|	3	23	0.130435	||	0	8	0	|	0	11	0	|	0	14	0	||	Unmodulated	0.106072
chr3:116676877	chr3	116676877	-	Intron	||	Gm43191;Slc35a3	||	0	3	2	||	0.407407	0	0.407407	||	6	9	0.666667	|	4	24	0.166667	|	7	18	0.388889	||	0	0	NA	|	0	20	0	|	0	26	0	||	Unmodulated	0.106311
chr3:35808055	chr3	35808055	+	Exon	||	Atp11b	||	10	3	3	||	0.205128	0	0.205128	||	4	24	0.166667	|	4	39	0.102564	|	9	26	0.346154	||	0	10	0	|	0	42	0	|	0	36	0	||	Unmodulated	0.106503
chr16:96023003	chr16	96023003	-	Intron	||	Brwd1	||	4	2	3	||	0.297619	0	0.297619	||	2	4	0.5	|	2	8	0.25	|	1	7	0.142857	||	0	11	0	|	0	10	0	|	0	14	0	||	Unmodulated	0.106573
chr11:117662326	chr11	117662326	+	Intron	||	Tnrc6c	||	6	3	3	||	0.180718	0.0571429	0.123575	||	1	8	0.125	|	6	38	0.157895	|	7	27	0.259259	||	0	6	0	|	6	42	0.142857	|	1	35	0.0285714	||	Unmodulated	0.106698
chr6:48398301	chr6	48398301	+	Intron	||	Krba1	||	2	3	2	||	0.142857	0.652778	-0.509921	||	3	7	0.428571	|	0	6	0	|	0	8	0	||	5	8	0.625	|	3	9	0.333333	|	2	2	1	||	Unmodulated	0.106758
chr14:34728622	chr14	34728622	+	Intron	||	Wapl	||	9	3	3	||	0.0708081	0	0.0708081	||	1	9	0.111111	|	3	39	0.0769231	|	1	41	0.0243902	||	0	12	0	|	0	48	0	|	0	73	0	||	Unmodulated	0.106902
chr2:91734251	chr2	91734251	+	Intron	||	Ambra1	||	2	2	3	||	0.598291	0.0416667	0.556624	||	2	2	1	|	12	36	0.333333	|	6	13	0.461538	||	2	16	0.125	|	0	20	0	|	0	25	0	||	Unmodulated	0.106952
chr8:94017312	chr8	94017312	-	intergenic	||	Nudt21	||	9	3	3	||	0.35237	0	0.35237	||	5	11	0.454545	|	4	39	0.102564	|	6	12	0.5	||	0	9	0	|	0	12	0	|	0	18	0	||	Unmodulated	0.107023
chr5:110797251	chr5	110797251	-	Intron	||	Ulk1	||	13	3	3	||	0.163219	0	0.163219	||	6	22	0.272727	|	2	14	0.142857	|	2	27	0.0740741	||	0	13	0	|	0	27	0	|	0	62	0	||	Unmodulated	0.107238
chr11:96964962	chr11	96964962	+	Exon	||	D030028A08Rik;Sp2	||	13	3	3	||	0.0901709	0	0.0901709	||	2	13	0.153846	|	1	20	0.05	|	1	15	0.0666667	||	0	13	0	|	0	19	0	|	0	22	0	||	Unmodulated	0.107365
chr3:88688597	chr3	88688597	+	Intron	||	2810403A07Rik	||	11	3	3	||	0.100351	0	0.100351	||	2	12	0.166667	|	1	23	0.0434783	|	1	11	0.0909091	||	0	11	0	|	0	16	0	|	0	15	0	||	Unmodulated	0.107563
chr2:90907208	chr2	90907208	+	Intron	||	Kbtbd4	||	7	3	3	||	0.218636	0	0.218636	||	1	16	0.0625	|	4	13	0.307692	|	2	7	0.285714	||	0	12	0	|	0	10	0	|	0	11	0	||	Unmodulated	0.107953
chr1:51468579	chr1	51468579	-	UTR	||	Nabp1	||	6	3	3	||	0.131944	0	0.131944	||	2	9	0.222222	|	2	18	0.111111	|	1	16	0.0625	||	0	12	0	|	0	11	0	|	0	6	0	||	Unmodulated	0.107958
chr6:112619612	chr6	112619612	-	intergenic	||	NA	||	3	2	3	||	0.366667	0.025641	0.341026	||	3	5	0.6	|	1	3	0.333333	|	2	12	0.166667	||	0	8	0	|	0	10	0	|	1	13	0.0769231	||	Unmodulated	0.108616
chr8:111954485	chr8	111954485	+	intergenic	||	NA	||	15	3	3	||	0.181834	0	0.181834	||	6	20	0.3	|	2	27	0.0740741	|	6	35	0.171429	||	0	15	0	|	0	47	0	|	0	71	0	||	Unmodulated	0.108751
chr17:47676255	chr17	47676255	+	Intron	||	Gm20517;Usp49	||	6	3	3	||	0.194017	0	0.194017	||	2	6	0.333333	|	3	26	0.115385	|	2	15	0.133333	||	0	7	0	|	0	17	0	|	0	30	0	||	Unmodulated	0.108858
chr8:111953504	chr8	111953504	+	UTR	||	Gabarapl2	||	5	3	3	||	0.166667	0	0.166667	||	1	5	0.2	|	1	20	0.05	|	3	12	0.25	||	0	15	0	|	0	26	0	|	0	32	0	||	Unmodulated	0.109129
chr9:73097228	chr9	73097228	+	UTR	||	Rab27a	||	38	3	3	||	0.0761935	0	0.0761935	||	4	38	0.105263	|	1	47	0.0212766	|	5	49	0.102041	||	0	63	0	|	0	44	0	|	0	86	0	||	Unmodulated	0.109144
chr8:124893813	chr8	124893813	-	UTR	||	Exoc8	||	22	3	3	||	0.156866	0	0.156866	||	6	25	0.24	|	2	41	0.0487805	|	4	22	0.181818	||	0	28	0	|	0	26	0	|	0	23	0	||	Unmodulated	0.109239
chr5:73049598	chr5	73049598	-	Intron	||	Fryl	||	5	3	3	||	0.581699	0	0.581699	||	5	5	1	|	14	34	0.411765	|	4	12	0.333333	||	0	8	0	|	0	5	0	|	0	11	0	||	Unmodulated	0.109688
chr6:113713130	chr6	113713130	+	intergenic	||	NA	||	9	3	3	||	0.174074	0	0.174074	||	3	10	0.3	|	1	9	0.111111	|	1	9	0.111111	||	0	11	0	|	0	29	0	|	0	14	0	||	Unmodulated	0.109714
chr9:44614484	chr9	44614484	+	Intron	||	Ddx6	||	6	3	3	||	0	0.068325	-0.068325	||	0	6	0	|	0	43	0	|	0	29	0	||	2	17	0.117647	|	2	43	0.0465116	|	2	49	0.0408163	||	Unmodulated	0.109733
chr7:27821626	chr7	27821626	+	intergenic	||	Zfp626	||	17	3	3	||	0.126702	0	0.126702	||	5	23	0.217391	|	3	32	0.09375	|	2	29	0.0689655	||	0	17	0	|	0	34	0	|	0	28	0	||	Unmodulated	0.110025
chr9:72475135	chr9	72475135	-	Exon	||	Tex9	||	5	3	3	||	0.310467	0	0.310467	||	4	9	0.444444	|	2	5	0.4	|	2	23	0.0869565	||	0	10	0	|	0	8	0	|	0	13	0	||	Unmodulated	0.110031
chr6:66540720	chr6	66540720	+	UTR	||	Mad2l1	||	112	3	3	||	0.0353308	0.00161031	0.0337205	||	12	203	0.0591133	|	4	229	0.0174672	|	4	136	0.0294118	||	0	230	0	|	0	112	0	|	1	207	0.00483092	||	Unmodulated	0.11015
chr17:56175902	chr17	56175902	-	UTR	||	Mydgf	||	19	3	3	||	0.251295	0	0.251295	||	6	19	0.315789	|	2	28	0.0714286	|	11	30	0.366667	||	0	42	0	|	0	39	0	|	0	28	0	||	Unmodulated	0.110183
chr2:119609284	chr2	119609284	-	intergenic	||	NA	||	12	3	3	||	0.241453	0	0.241453	||	5	12	0.416667	|	4	26	0.153846	|	4	26	0.153846	||	0	20	0	|	0	48	0	|	0	68	0	||	Unmodulated	0.110291
chr12:57178783	chr12	57178783	-	Intron	||	Slc25a21	||	4	3	2	||	0.0969089	0	0.0969089	||	1	6	0.166667	|	4	56	0.0714286	|	2	38	0.0526316	||	0	4	0	|	0	46	0	|	0	61	0	||	Unmodulated	0.111013
chr9:41038231	chr9	41038231	-	Intron	||	Ubash3b	||	1	2	2	||	0.299242	0	0.299242	||	2	4	0.5	|	1	8	0.125	|	3	11	0.272727	||	0	1	0	|	0	7	0	|	0	6	0	||	Unmodulated	0.111124
chr9:120122705	chr9	120122705	+	Intron	||	Slc25a38	||	7	3	3	||	0.170238	0.0208333	0.149405	||	1	8	0.125	|	1	10	0.1	|	2	7	0.285714	||	1	16	0.0625	|	0	13	0	|	0	11	0	||	Unmodulated	0.111347
chr15:81456163	chr15	81456163	+	UTR	||	Xpnpep3	||	10	3	3	||	0.186247	0.0175439	0.168703	||	3	10	0.3	|	1	13	0.0769231	|	2	11	0.181818	||	1	19	0.0526316	|	0	19	0	|	0	20	0	||	Unmodulated	0.111444
chr11:116581137	chr11	116581137	-	Exon	||	Ube2o	||	38	3	3	||	0.0589944	0	0.0589944	||	2	38	0.0526316	|	5	198	0.0252525	|	11	111	0.0990991	||	0	54	0	|	0	112	0	|	0	160	0	||	Unmodulated	0.111581
chr2:132309863	chr2	132309863	+	UTR	||	Cds2	||	13	3	3	||	0.0921189	0	0.0921189	||	3	20	0.15	|	2	60	0.0333333	|	4	43	0.0930233	||	0	13	0	|	0	38	0	|	0	57	0	||	Unmodulated	0.111726
chr7:34365460	chr7	34365460	-	Intron	||	Lsm14a	||	6	3	3	||	0.156433	0	0.156433	||	2	8	0.25	|	1	19	0.0526316	|	2	12	0.166667	||	0	6	0	|	0	15	0	|	0	8	0	||	Unmodulated	0.11175
chr6:83415017	chr6	83415017	-	Intron	||	Tet3	||	1	3	2	||	0.109787	0	0.109787	||	1	6	0.166667	|	1	31	0.0322581	|	3	23	0.130435	||	0	1	0	|	0	11	0	|	0	12	0	||	Unmodulated	0.111767
chr2:119106984	chr2	119106984	+	intergenic	||	NA	||	7	3	3	||	0.0899203	0	0.0899203	||	2	18	0.111111	|	2	79	0.0253165	|	2	15	0.133333	||	0	7	0	|	0	12	0	|	0	58	0	||	Unmodulated	0.112038
chr4:154919739	chr4	154919739	-	intergenic	||	NA	||	47	3	3	||	0.0622782	0.00141243	0.0608658	||	1	47	0.0212766	|	11	164	0.0670732	|	13	132	0.0984848	||	0	54	0	|	0	108	0	|	1	236	0.00423729	||	Unmodulated	0.112518
chr11:5076827	chr11	5076827	-	Intron	||	Ewsr1	||	9	3	3	||	0.0644043	0	0.0644043	||	1	9	0.111111	|	2	42	0.047619	|	1	29	0.0344828	||	0	13	0	|	0	49	0	|	0	48	0	||	Unmodulated	0.112609
chr9:44609966	chr9	44609966	+	Intron	||	Ddx6	||	8	3	3	||	0.0480543	0	0.0480543	||	1	12	0.0833333	|	1	35	0.0285714	|	1	31	0.0322581	||	0	8	0	|	0	26	0	|	0	27	0	||	Unmodulated	0.112807
chr4:116539391	chr4	116539391	+	intergenic	||	NA	||	6	3	3	||	0.0959967	0	0.0959967	||	1	6	0.166667	|	1	17	0.0588235	|	1	16	0.0625	||	0	6	0	|	0	24	0	|	0	15	0	||	Unmodulated	0.113069
chr7:123129272	chr7	123129272	+	Intron	||	Gm45846;Tnrc6a	||	13	3	3	||	0.00617284	0.0698071	-0.0636343	||	0	15	0	|	1	54	0.0185185	|	0	54	0	||	1	13	0.0769231	|	4	37	0.108108	|	1	41	0.0243902	||	Unmodulated	0.113453
chr5:143041520	chr5	143041520	-	Intron	||	Rnf216	||	7	3	3	||	0.217593	0	0.217593	||	3	8	0.375	|	1	9	0.111111	|	2	12	0.166667	||	0	7	0	|	0	11	0	|	0	8	0	||	Unmodulated	0.113523
chr19:3784108	chr19	3784108	+	Intron	||	Kmt5b	||	0	2	2	||	0.338889	0	0.338889	||	0	0	NA	|	5	18	0.277778	|	2	5	0.4	||	0	4	0	|	0	6	0	|	0	6	0	||	Unmodulated	0.11358
chr10:43607804	chr10	43607804	+	Intron	||	F930017D23Rik	||	21	3	3	||	0.0347763	0	0.0347763	||	1	21	0.047619	|	1	110	0.00909091	|	5	105	0.047619	||	0	33	0	|	0	71	0	|	0	134	0	||	Unmodulated	0.113605
chr18:32102522	chr18	32102522	+	UTR	||	Iws1	||	19	3	3	||	0.0684211	0	0.0684211	||	2	19	0.105263	|	1	50	0.02	|	2	25	0.08	||	0	21	0	|	0	53	0	|	0	41	0	||	Unmodulated	0.113737
chr2:31601224	chr2	31601224	+	Intron	||	Fubp3	||	0	2	2	||	0.35873	0	0.35873	||	3	5	0.6	|	1	3	0.333333	|	1	7	0.142857	||	0	0	NA	|	0	5	0	|	0	6	0	||	Unmodulated	0.113746
chr6:113087575	chr6	113087575	+	Intron	||	Setd5	||	9	3	3	||	0.23048	0.0563218	0.174159	||	3	9	0.333333	|	7	28	0.25	|	4	37	0.108108	||	1	15	0.0666667	|	1	30	0.0333333	|	2	29	0.0689655	||	Unmodulated	0.113754
chr17:17030353	chr17	17030353	+	intergenic	||	NA	||	0	2	2	||	0.303704	0	0.303704	||	1	2	0.5	|	1	9	0.111111	|	3	10	0.3	||	0	0	NA	|	0	6	0	|	0	7	0	||	Unmodulated	0.113811
chr13:112808005	chr13	112808005	+	Intron	||	Plpp1	||	4	2	3	||	0.227669	0.519781	-0.292112	||	0	4	0	|	5	17	0.294118	|	7	18	0.388889	||	5	8	0.625	|	6	11	0.545455	|	7	18	0.388889	||	Unmodulated	0.114136
chr17:35858635	chr17	35858635	+	UTR	||	Mdc1	||	20	3	3	||	0.0473104	0	0.0473104	||	2	27	0.0740741	|	3	56	0.0535714	|	1	70	0.0142857	||	0	20	0	|	0	24	0	|	0	70	0	||	Unmodulated	0.114362
chr2:151034393	chr2	151034393	-	Intron	||	Nanp;Ninl	||	5	3	3	||	0.230556	0	0.230556	||	2	5	0.4	|	1	6	0.166667	|	1	8	0.125	||	0	18	0	|	0	21	0	|	0	29	0	||	Unmodulated	0.114563
chr17:5854486	chr17	5854486	+	Intron	||	Snx9	||	2	2	2	||	0.730769	0.266667	0.464103	||	1	2	0.5	|	14	14	1	|	9	13	0.692308	||	0	2	0	|	3	5	0.6	|	2	10	0.2	||	Unmodulated	0.114843
chr7:29223123	chr7	29223123	-	UTR	||	Kcnk6	||	9	3	3	||	0.127106	0	0.127106	||	1	26	0.0384615	|	3	15	0.2	|	2	14	0.142857	||	0	25	0	|	0	15	0	|	0	9	0	||	Unmodulated	0.115035
chr8:111005126	chr8	111005126	-	UTR	||	Ddx19b	||	8	3	3	||	0.218939	0	0.218939	||	3	8	0.375	|	1	10	0.1	|	2	11	0.181818	||	0	11	0	|	0	34	0	|	0	18	0	||	Unmodulated	0.11519
chr14:31043363	chr14	31043363	+	Intron	||	Pbrm1	||	1	2	2	||	0.622222	0	0.622222	||	3	3	1	|	1	5	0.2	|	6	9	0.666667	||	0	1	0	|	0	7	0	|	0	5	0	||	Unmodulated	0.115446
chr4:155622371	chr4	155622371	+	UTR	||	Gm10563;Gm16023;Slc35e2	||	15	3	3	||	0.262727	0	0.262727	||	1	15	0.0666667	|	17	48	0.354167	|	18	49	0.367347	||	0	19	0	|	0	35	0	|	0	43	0	||	Unmodulated	0.115724
chr9:96057210	chr9	96057210	+	UTR	||	Xrn1	||	26	3	3	||	0.112301	0	0.112301	||	5	26	0.192308	|	7	74	0.0945946	|	2	40	0.05	||	0	40	0	|	0	63	0	|	0	62	0	||	Unmodulated	0.116138
chr17:36005300	chr17	36005300	-	Intron	||	A930015D03Rik	||	14	3	3	||	0.107143	0	0.107143	||	1	14	0.0714286	|	2	32	0.0625	|	3	16	0.1875	||	0	22	0	|	0	30	0	|	0	31	0	||	Unmodulated	0.116947
chr18:34629680	chr18	34629680	+	Intron	||	Kif20a	||	4	2	3	||	0.597884	0	0.597884	||	4	4	1	|	4	7	0.571429	|	2	9	0.222222	||	0	12	0	|	0	16	0	|	0	7	0	||	Unmodulated	0.117161
chr2:120600911	chr2	120600911	+	UTR	||	Snap23	||	10	3	3	||	0.0577441	0	0.0577441	||	1	10	0.1	|	1	36	0.0277778	|	1	22	0.0454545	||	0	28	0	|	0	42	0	|	0	26	0	||	Unmodulated	0.117277
chr5:149712800	chr5	149712800	+	Intron	||	B3glct	||	0	2	2	||	0.416667	0.0185185	0.398148	||	2	6	0.333333	|	0	0	NA	|	5	10	0.5	||	0	1	0	|	1	18	0.0555556	|	0	6	0	||	Unmodulated	0.117524
chr16:22854464	chr16	22854464	-	Intron	||	Tbccd1	||	19	3	3	||	0.119936	0	0.119936	||	2	19	0.105263	|	9	44	0.204545	|	1	20	0.05	||	0	21	0	|	0	29	0	|	0	32	0	||	Unmodulated	0.117569
chr1:89803809	chr1	89803809	+	Intron	||	Agap1	||	4	3	2	||	0.257576	0.0444444	0.213131	||	1	10	0.1	|	3	11	0.272727	|	4	10	0.4	||	0	4	0	|	0	9	0	|	2	15	0.133333	||	Unmodulated	0.11767
chr12:85124408	chr12	85124408	+	Intron	||	Dlst	||	10	3	3	||	0.125766	0.0222222	0.103544	||	1	10	0.1	|	2	29	0.0689655	|	5	24	0.208333	||	0	19	0	|	1	15	0.0666667	|	0	39	0	||	Unmodulated	0.117705
chr1:13625741	chr1	13625741	-	UTR	||	Lactb2	||	10	3	3	||	0.187013	0.0166667	0.170346	||	2	14	0.142857	|	7	22	0.318182	|	1	10	0.1	||	0	12	0	|	1	20	0.05	|	0	26	0	||	Unmodulated	0.117815
chr15:53244103	chr15	53244103	-	Intron	||	Ext1	||	6	3	3	||	0.025641	0.14504	-0.119399	||	0	6	0	|	2	26	0.0769231	|	0	14	0	||	3	16	0.1875	|	1	21	0.047619	|	2	10	0.2	||	Unmodulated	0.118353
chr7:67255625	chr7	67255625	-	Intron	||	Lysmd4;Mef2a	||	0	2	2	||	0.291667	0.0833333	0.208333	||	0	0	NA	|	2	6	0.333333	|	3	12	0.25	||	1	4	0.25	|	0	8	0	|	0	12	0	||	Unmodulated	0.118464
chr13:67473372	chr13	67473372	-	UTR	||	AC154510.1;Zfp874b	||	3	3	2	||	0.215346	0	0.215346	||	4	14	0.285714	|	1	19	0.0526316	|	4	13	0.307692	||	0	3	0	|	0	8	0	|	0	11	0	||	Unmodulated	0.118591
chr4:44024429	chr4	44024429	+	Intron	||	Clta	||	9	3	3	||	0.128836	0	0.128836	||	2	9	0.222222	|	2	35	0.0571429	|	3	28	0.107143	||	0	9	0	|	0	20	0	|	0	44	0	||	Unmodulated	0.118798
chr17:46499378	chr17	46499378	+	UTR	||	Dnph1;Gm26904	||	12	3	3	||	0.101131	0	0.101131	||	3	17	0.176471	|	1	13	0.0769231	|	1	20	0.05	||	0	12	0	|	0	24	0	|	0	12	0	||	Unmodulated	0.11931
chr17:24406418	chr17	24406418	-	Intron	||	Abca3;D330041H03Rik	||	9	3	3	||	0.235802	0.037037	0.198765	||	3	9	0.333333	|	15	50	0.3	|	2	27	0.0740741	||	2	18	0.111111	|	0	17	0	|	0	32	0	||	Unmodulated	0.119429
chr13:24814652	chr13	24814652	+	intergenic	||	BC005537	||	13	3	3	||	0.14908	0	0.14908	||	3	17	0.176471	|	3	13	0.230769	|	1	25	0.04	||	0	18	0	|	0	47	0	|	0	55	0	||	Unmodulated	0.119479
chr2:121543887	chr2	121543887	+	UTR	||	Wdr76	||	26	3	3	||	0.111873	0	0.111873	||	1	26	0.0384615	|	4	36	0.111111	|	8	43	0.186047	||	0	30	0	|	0	29	0	|	0	80	0	||	Unmodulated	0.119576
chrX:60375512	chrX	60375512	-	Intron	||	Atp11c	||	6	3	3	||	0.501253	0.0555556	0.445698	||	6	7	0.857143	|	11	38	0.289474	|	5	14	0.357143	||	1	6	0.166667	|	0	11	0	|	0	17	0	||	Unmodulated	0.120179
chr15:81456130	chr15	81456130	+	UTR	||	Xpnpep3	||	9	3	3	||	0.294613	0	0.294613	||	1	9	0.111111	|	5	10	0.5	|	3	11	0.272727	||	0	23	0	|	0	16	0	|	0	18	0	||	Unmodulated	0.120625
chr19:45589649	chr19	45589649	-	Intron	||	Fbxw4	||	2	2	2	||	0.327778	0	0.327778	||	2	4	0.5	|	2	5	0.4	|	1	12	0.0833333	||	0	2	0	|	0	5	0	|	0	18	0	||	Unmodulated	0.120773
chr1:91392781	chr1	91392781	-	Intron	||	Ilkap	||	5	3	3	||	0.347422	0	0.347422	||	3	5	0.6	|	5	17	0.294118	|	4	27	0.148148	||	0	9	0	|	0	15	0	|	0	21	0	||	Unmodulated	0.120806
chr17:36004469	chr17	36004469	-	Intron	||	A930015D03Rik	||	19	3	3	||	0.0659207	0.0138889	0.0520318	||	2	19	0.105263	|	4	124	0.0322581	|	5	83	0.060241	||	1	24	0.0416667	|	0	35	0	|	0	93	0	||	Unmodulated	0.121121
chr2:91603138	chr2	91603138	+	Intron	||	Ckap5	||	8	3	3	||	0.377996	0	0.377996	||	11	18	0.611111	|	4	36	0.111111	|	7	17	0.411765	||	0	8	0	|	0	38	0	|	0	34	0	||	Unmodulated	0.121457
chr17:25929471	chr17	25929471	-	Intron	||	Gm16278;Gm26694;Pigq	||	59	3	3	||	0.0847435	0	0.0847435	||	10	69	0.144928	|	10	131	0.0763359	|	3	91	0.032967	||	0	68	0	|	0	59	0	|	0	154	0	||	Unmodulated	0.121534
chr11:75300623	chr11	75300623	-	UTR	||	Rpa1	||	238	3	3	||	0.0368661	0.00584146	0.0310246	||	13	306	0.0424837	|	4	303	0.0132013	|	19	346	0.0549133	||	4	347	0.0115274	|	1	238	0.00420168	|	1	557	0.00179533	||	Unmodulated	0.122055
chr18:32548347	chr18	32548347	-	Intron	||	Gypc	||	17	3	3	||	0.073913	0.00854701	0.065366	||	1	46	0.0217391	|	5	55	0.0909091	|	6	55	0.109091	||	0	17	0	|	0	41	0	|	3	117	0.025641	||	Unmodulated	0.122653
chr13:74645918	chr13	74645918	+	Intron	||	Erap1	||	3	2	2	||	0.427778	0	0.427778	||	3	4	0.75	|	2	10	0.2	|	4	12	0.333333	||	0	3	0	|	0	12	0	|	0	7	0	||	Unmodulated	0.122902
chr13:43438223	chr13	43438223	-	Intron	||	Ranbp9	||	3	2	3	||	0.0277778	0.228571	-0.200794	||	0	3	0	|	0	25	0	|	2	24	0.0833333	||	2	6	0.333333	|	2	7	0.285714	|	1	15	0.0666667	||	Unmodulated	0.122906
chr9:96057177	chr9	96057177	+	UTR	||	Xrn1	||	16	3	3	||	0.0690789	0	0.0690789	||	1	16	0.0625	|	9	76	0.118421	|	1	38	0.0263158	||	0	41	0	|	0	73	0	|	0	55	0	||	Unmodulated	0.123222
chr7:143526059	chr7	143526059	-	Intron	||	Nap1l4	||	16	3	3	||	0.0949907	0	0.0949907	||	3	19	0.157895	|	3	31	0.0967742	|	1	33	0.030303	||	0	16	0	|	0	40	0	|	0	49	0	||	Unmodulated	0.123237
chr11:65775196	chr11	65775196	-	Intron	||	Map2k4	||	5	3	3	||	0.141358	0	0.141358	||	2	8	0.25	|	2	27	0.0740741	|	1	10	0.1	||	0	5	0	|	0	13	0	|	0	14	0	||	Unmodulated	0.123262
chr5:103830539	chr5	103830539	+	Intron	||	Aff1	||	8	3	3	||	0.0716912	0	0.0716912	||	1	8	0.125	|	1	32	0.03125	|	2	34	0.0588235	||	0	16	0	|	0	24	0	|	0	46	0	||	Unmodulated	0.123319
chr17:32819186	chr17	32819186	-	UTR	||	Gm26693;Zfp799	||	5	3	3	||	0.195527	0	0.195527	||	1	14	0.0714286	|	2	11	0.181818	|	2	6	0.333333	||	0	8	0	|	0	5	0	|	0	5	0	||	Unmodulated	0.123445
chr1:86345911	chr1	86345911	-	UTR	||	Ncl	||	11	3	3	||	0.179701	0	0.179701	||	3	13	0.230769	|	4	15	0.266667	|	1	24	0.0416667	||	0	11	0	|	0	37	0	|	0	31	0	||	Unmodulated	0.123503
chr4:40850187	chr4	40850187	-	Exon	||	B4galt1;Gm24112	||	2	2	3	||	0	0.117593	-0.117593	||	0	2	0	|	0	14	0	|	0	13	0	||	2	10	0.2	|	2	18	0.111111	|	1	24	0.0416667	||	Unmodulated	0.12418
chr2:154586394	chr2	154586394	-	UTR	||	Pxmp4	||	4	3	2	||	0.192308	0	0.192308	||	1	6	0.166667	|	1	13	0.0769231	|	3	9	0.333333	||	0	4	0	|	0	10	0	|	0	7	0	||	Unmodulated	0.124686
chr18:65478445	chr18	65478445	+	UTR	||	Malt1	||	14	3	3	||	0.205649	0	0.205649	||	5	14	0.357143	|	6	34	0.176471	|	2	24	0.0833333	||	0	16	0	|	0	16	0	|	0	25	0	||	Unmodulated	0.124799
chr17:47518805	chr17	47518805	+	Intron	||	Ccnd3	||	18	3	3	||	0.0802891	0	0.0802891	||	3	21	0.142857	|	4	91	0.043956	|	2	37	0.0540541	||	0	18	0	|	0	36	0	|	0	20	0	||	Unmodulated	0.125052
chr1:156600134	chr1	156600134	+	Intron	||	Abl2	||	1	2	2	||	0.253968	0	0.253968	||	1	4	0.25	|	1	12	0.0833333	|	3	7	0.428571	||	0	1	0	|	0	6	0	|	0	6	0	||	Unmodulated	0.125663
chr7:123128163	chr7	123128163	+	Intron	||	Gm45846;Tnrc6a	||	15	3	3	||	0.113276	0	0.113276	||	4	21	0.190476	|	5	44	0.113636	|	1	28	0.0357143	||	0	15	0	|	0	28	0	|	0	32	0	||	Unmodulated	0.126665
chr17:21989061	chr17	21989061	+	Intron	||	Zfp943	||	7	3	3	||	0	0.166128	-0.166128	||	0	7	0	|	0	22	0	|	0	7	0	||	2	7	0.285714	|	1	17	0.0588235	|	2	13	0.153846	||	Unmodulated	0.127499
chr13:24708030	chr13	24708030	+	Intron	||	Ripor2	||	8	3	3	||	0.143519	0	0.143519	||	1	8	0.125	|	1	18	0.0555556	|	2	8	0.25	||	0	8	0	|	0	15	0	|	0	10	0	||	Unmodulated	0.127712
chr17:36004489	chr17	36004489	-	Intron	||	A930015D03Rik	||	24	3	3	||	0.0355172	0	0.0355172	||	1	24	0.0416667	|	1	117	0.00854701	|	4	71	0.056338	||	0	26	0	|	0	39	0	|	0	91	0	||	Unmodulated	0.128538
chr13:49531527	chr13	49531527	-	UTR	||	Cenpp;Ecm2	||	11	3	3	||	0.139277	0	0.139277	||	1	11	0.0909091	|	8	32	0.25	|	1	13	0.0769231	||	0	16	0	|	0	14	0	|	0	34	0	||	Unmodulated	0.128845
chr9:88478033	chr9	88478033	-	Intron	||	Syncrip	||	8	3	3	||	0.139061	0	0.139061	||	2	8	0.25	|	3	38	0.0789474	|	3	34	0.0882353	||	0	11	0	|	0	26	0	|	0	31	0	||	Unmodulated	0.12927
chr4:124944301	chr4	124944301	+	Exon	||	9930104L06Rik	||	11	3	3	||	0.238312	0	0.238312	||	6	14	0.428571	|	3	22	0.136364	|	3	20	0.15	||	0	12	0	|	0	11	0	|	0	21	0	||	Unmodulated	0.129361
chrX:150985462	chrX	150985462	-	UTR	||	Gnl3l	||	26	3	3	||	0.0579594	0	0.0579594	||	1	26	0.0384615	|	1	32	0.03125	|	5	48	0.104167	||	0	27	0	|	0	50	0	|	0	50	0	||	Unmodulated	0.129734
chr11:75301019	chr11	75301019	-	UTR	||	Rpa1	||	201	3	3	||	0.00248538	0.00922188	-0.0067365	||	0	295	0	|	1	240	0.00416667	|	1	304	0.00328947	||	2	351	0.00569801	|	3	201	0.0149254	|	3	426	0.00704225	||	Unmodulated	0.129851
chr7:80222755	chr7	80222755	+	Intron	||	Sema4b	||	8	3	3	||	0.105352	0	0.105352	||	1	8	0.125	|	1	41	0.0243902	|	4	24	0.166667	||	0	16	0	|	0	19	0	|	0	23	0	||	Unmodulated	0.130059
chr7:66173734	chr7	66173734	+	UTR	||	Chsy1	||	52	3	3	||	0.0441193	0	0.0441193	||	5	64	0.078125	|	1	54	0.0185185	|	2	56	0.0357143	||	0	52	0	|	0	64	0	|	0	54	0	||	Unmodulated	0.130389
chr18:64477337	chr18	64477337	-	Intron	||	Fech	||	19	3	3	||	0.411986	0	0.411986	||	14	19	0.736842	|	13	67	0.19403	|	18	59	0.305085	||	0	21	0	|	0	27	0	|	0	112	0	||	Unmodulated	0.130595
chr12:112958242	chr12	112958242	-	intergenic	||	NA	||	11	3	3	||	0.545129	0.178571	0.366557	||	9	11	0.818182	|	13	39	0.333333	|	15	31	0.483871	||	6	14	0.428571	|	3	28	0.107143	|	0	43	0	||	Unmodulated	0.130621
chr11:96808686	chr11	96808686	+	intergenic	||	NA	||	3	2	3	||	0.185859	0	0.185859	||	1	3	0.333333	|	1	11	0.0909091	|	2	15	0.133333	||	0	7	0	|	0	12	0	|	0	15	0	||	Unmodulated	0.130759
chr3:87940165	chr3	87940165	+	UTR	||	Isg20l2	||	54	3	3	||	0.0588047	0	0.0588047	||	4	58	0.0689655	|	1	73	0.0136986	|	6	64	0.09375	||	0	80	0	|	0	56	0	|	0	54	0	||	Unmodulated	0.130858
chr2:112280350	chr2	112280350	+	Intron	||	Gm21985;Slc12a6	||	9	3	3	||	0.0525794	0	0.0525794	||	1	12	0.0833333	|	1	84	0.0119048	|	2	32	0.0625	||	0	9	0	|	0	32	0	|	0	36	0	||	Unmodulated	0.131381
chr8:124893807	chr8	124893807	-	UTR	||	Exoc8	||	21	3	3	||	0.117451	0	0.117451	||	5	24	0.208333	|	2	41	0.0487805	|	2	21	0.0952381	||	0	26	0	|	0	25	0	|	0	23	0	||	Unmodulated	0.131405
chr2:112346458	chr2	112346458	+	Intron	||	Gm21985;Slc12a6	||	9	3	3	||	0.121815	0.0151515	0.106663	||	3	16	0.1875	|	2	57	0.0350877	|	4	28	0.142857	||	0	9	0	|	0	17	0	|	1	22	0.0454545	||	Unmodulated	0.131499
chr8:72480147	chr8	72480147	-	intergenic	||	NA	||	4	3	2	||	0.292208	0	0.292208	||	3	6	0.5	|	2	22	0.0909091	|	4	14	0.285714	||	0	4	0	|	0	8	0	|	0	21	0	||	Unmodulated	0.131882
chr2:120601866	chr2	120601866	+	intergenic	||	NA	||	15	3	3	||	0.204938	0	0.204938	||	2	15	0.133333	|	10	27	0.37037	|	2	18	0.111111	||	0	16	0	|	0	44	0	|	0	20	0	||	Unmodulated	0.132162
chr4:155621968	chr4	155621968	+	UTR	||	Gm10563;Gm16023;Slc35e2	||	21	3	3	||	0.132426	0	0.132426	||	5	21	0.238095	|	7	73	0.0958904	|	5	79	0.0632911	||	0	32	0	|	0	87	0	|	0	88	0	||	Unmodulated	0.13239
chr4:108230936	chr4	108230936	-	UTR	||	Zyg11b	||	36	3	3	||	0.161969	0.00396825	0.158	||	4	49	0.0816327	|	6	52	0.115385	|	13	45	0.288889	||	0	36	0	|	1	84	0.0119048	|	0	46	0	||	Unmodulated	0.132436
chr15:103247678	chr15	103247678	-	intergenic	||	NA	||	9	3	3	||	0.252358	0	0.252358	||	4	9	0.444444	|	2	21	0.0952381	|	5	23	0.217391	||	0	11	0	|	0	24	0	|	0	30	0	||	Unmodulated	0.132478
chr5:34477808	chr5	34477808	+	Intron	||	Fam193a	||	13	3	3	||	0.207082	0.111532	0.0955498	||	3	13	0.230769	|	4	21	0.190476	|	5	25	0.2	||	4	22	0.181818	|	2	18	0.111111	|	1	24	0.0416667	||	Unmodulated	0.132613
chr19:46335880	chr19	46335880	-	Intron	||	Cuedc2;Gm26792	||	6	3	3	||	0.184524	0	0.184524	||	1	8	0.125	|	2	21	0.0952381	|	2	6	0.333333	||	0	7	0	|	0	13	0	|	0	13	0	||	Unmodulated	0.132733
chr2:90724592	chr2	90724592	+	Intron	||	Nup160	||	3	3	2	||	0.256119	0	0.256119	||	6	13	0.461538	|	2	16	0.125	|	2	11	0.181818	||	0	3	0	|	0	11	0	|	0	7	0	||	Unmodulated	0.132839
chr16:32300258	chr16	32300258	+	UTR	||	Rnf168	||	52	3	3	||	0.0713627	0	0.0713627	||	8	63	0.126984	|	2	68	0.0294118	|	3	52	0.0576923	||	0	76	0	|	0	63	0	|	0	86	0	||	Unmodulated	0.132864
chr4:155611199	chr4	155611199	+	Intron	||	Gm16023;Slc35e2	||	11	3	3	||	0.103419	0.030303	0.0731158	||	3	20	0.15	|	2	24	0.0833333	|	1	13	0.0769231	||	1	11	0.0909091	|	0	33	0	|	0	23	0	||	Unmodulated	0.133221
chr9:15266441	chr9	15266441	-	Intron	||	Med17	||	11	3	3	||	0.137778	0	0.137778	||	2	25	0.08	|	4	16	0.25	|	2	24	0.0833333	||	0	11	0	|	0	20	0	|	0	31	0	||	Unmodulated	0.133481
chr4:120820609	chr4	120820609	-	Intron	||	Nfyc	||	6	3	3	||	0.018018	0.102222	-0.0842042	||	0	13	0	|	0	34	0	|	2	37	0.0540541	||	1	6	0.166667	|	2	20	0.1	|	1	25	0.04	||	Unmodulated	0.133485
chr11:70643499	chr11	70643499	-	intergenic	||	NA	||	6	3	3	||	0.194444	0.0833333	0.111111	||	2	8	0.25	|	2	12	0.166667	|	1	6	0.166667	||	1	6	0.166667	|	1	12	0.0833333	|	0	6	0	||	Unmodulated	0.133583
chr19:41503125	chr19	41503125	+	Intron	||	Lcor	||	11	3	3	||	0.100529	0	0.100529	||	2	11	0.181818	|	3	43	0.0697674	|	2	40	0.05	||	0	11	0	|	0	45	0	|	0	70	0	||	Unmodulated	0.13399
chr9:65075993	chr9	65075993	+	Intron	||	AC122463.1;Dpp8	||	9	3	3	||	0.111532	0.0185185	0.0930135	||	2	11	0.181818	|	1	24	0.0416667	|	1	9	0.111111	||	0	13	0	|	1	18	0.0555556	|	0	14	0	||	Unmodulated	0.134092
chr14:20642795	chr14	20642795	+	Exon	||	2810402E24Rik	||	6	3	3	||	0.315359	0	0.315359	||	2	6	0.333333	|	1	12	0.0833333	|	9	17	0.529412	||	0	16	0	|	0	8	0	|	0	10	0	||	Unmodulated	0.134547
chr15:103247679	chr15	103247679	-	intergenic	||	NA	||	10	3	3	||	0.111525	0	0.111525	||	2	10	0.2	|	1	21	0.047619	|	2	23	0.0869565	||	0	11	0	|	0	25	0	|	0	29	0	||	Unmodulated	0.134649
chr1:191830149	chr1	191830149	+	Intron	||	Nek2	||	5	3	3	||	0.110084	0	0.110084	||	1	5	0.2	|	1	14	0.0714286	|	1	17	0.0588235	||	0	9	0	|	0	23	0	|	0	34	0	||	Unmodulated	0.134762
chr9:70556178	chr9	70556178	+	Intron	||	Sltm	||	4	3	2	||	0.161676	0	0.161676	||	1	11	0.0909091	|	5	17	0.294118	|	1	10	0.1	||	0	4	0	|	0	7	0	|	0	8	0	||	Unmodulated	0.134858
chr2:91213284	chr2	91213284	+	UTR	||	Acp2;Ddb2	||	13	3	3	||	0.17089	0	0.17089	||	2	13	0.153846	|	6	20	0.3	|	1	17	0.0588235	||	0	18	0	|	0	34	0	|	0	35	0	||	Unmodulated	0.135141
chr8:3679970	chr8	3679970	+	UTR	||	Trappc5	||	26	3	3	||	0.110326	0	0.110326	||	7	35	0.2	|	2	26	0.0769231	|	2	37	0.0540541	||	0	39	0	|	0	38	0	|	0	40	0	||	Unmodulated	0.135323
chr11:23271971	chr11	23271971	+	Intron	||	Xpo1	||	16	3	3	||	0.102941	0	0.102941	||	3	16	0.1875	|	3	51	0.0588235	|	3	48	0.0625	||	0	18	0	|	0	35	0	|	0	37	0	||	Unmodulated	0.135352
chr5:110852120	chr5	110852120	+	Intron	||	Chek2	||	7	3	3	||	0.126374	0	0.126374	||	3	13	0.230769	|	2	28	0.0714286	|	1	13	0.0769231	||	0	7	0	|	0	28	0	|	0	40	0	||	Unmodulated	0.136623
chr9:96057173	chr9	96057173	+	UTR	||	Xrn1	||	18	3	3	||	0.185185	0	0.185185	||	1	18	0.0555556	|	25	78	0.320513	|	7	39	0.179487	||	0	41	0	|	0	72	0	|	0	52	0	||	Unmodulated	0.136665
chr11:68985982	chr11	68985982	-	UTR	||	Pfas	||	17	3	3	||	0.0867322	0	0.0867322	||	1	17	0.0588235	|	1	23	0.0434783	|	6	38	0.157895	||	0	35	0	|	0	48	0	|	0	34	0	||	Unmodulated	0.136716
chr15:8158190	chr15	8158190	+	UTR	||	Nup155	||	34	3	3	||	0.107575	0	0.107575	||	4	34	0.117647	|	2	77	0.025974	|	12	67	0.179104	||	0	37	0	|	0	75	0	|	0	68	0	||	Unmodulated	0.136806
chr7:34166804	chr7	34166804	-	Intron	||	Uba2	||	7	3	3	||	0.327976	0	0.327976	||	4	7	0.571429	|	1	10	0.1	|	5	16	0.3125	||	0	8	0	|	0	10	0	|	0	14	0	||	Unmodulated	0.137886
chr19:5290870	chr19	5290870	-	Intron	||	Sf3b2	||	7	3	3	||	0.379365	0	0.379365	||	8	16	0.5	|	2	30	0.0666667	|	4	7	0.571429	||	0	16	0	|	0	13	0	|	0	19	0	||	Unmodulated	0.137937
chr10:22312042	chr10	22312042	+	Exon	||	C920009B18Rik;Raet1e	||	2	2	2	||	0.611111	0	0.611111	||	2	2	1	|	2	15	0.133333	|	14	20	0.7	||	0	7	0	|	0	3	0	|	0	12	0	||	Unmodulated	0.13799
chr16:20544761	chr16	20544761	+	UTR	||	Ap2m1	||	4	3	2	||	0.275	0	0.275	||	1	5	0.2	|	1	8	0.125	|	5	10	0.5	||	0	4	0	|	0	7	0	|	0	7	0	||	Unmodulated	0.138414
chr12:8247287	chr12	8247287	+	Intron	||	Ldah	||	2	2	3	||	0.55	0	0.55	||	2	2	1	|	3	12	0.25	|	6	15	0.4	||	0	5	0	|	0	7	0	|	0	9	0	||	Unmodulated	0.138414
chr13:49531525	chr13	49531525	-	UTR	||	Cenpp;Ecm2	||	11	3	3	||	0.206638	0	0.206638	||	2	11	0.181818	|	11	30	0.366667	|	1	14	0.0714286	||	0	16	0	|	0	14	0	|	0	33	0	||	Unmodulated	0.138521
chr17:25929254	chr17	25929254	-	Intron	||	Gm16278;Gm26694;Pigq	||	24	3	3	||	0.193702	0	0.193702	||	12	34	0.352941	|	7	51	0.137255	|	4	44	0.0909091	||	0	37	0	|	0	24	0	|	0	53	0	||	Unmodulated	0.138524
chr4:136565189	chr4	136565189	-	Intron	||	Kdm1a	||	7	3	3	||	0.218682	0	0.218682	||	2	9	0.222222	|	1	17	0.0588235	|	3	8	0.375	||	0	7	0	|	0	14	0	|	0	21	0	||	Unmodulated	0.138869
chr1:133137561	chr1	133137561	+	UTR	||	Ppp1r15b	||	60	3	3	||	0.0614164	0	0.0614164	||	6	60	0.1	|	1	78	0.0128205	|	8	112	0.0714286	||	0	65	0	|	0	77	0	|	0	151	0	||	Unmodulated	0.139053
chrX:150984257	chrX	150984257	-	UTR	||	Gnl3l	||	12	3	3	||	0.139339	0	0.139339	||	3	12	0.25	|	3	26	0.115385	|	2	38	0.0526316	||	0	27	0	|	0	39	0	|	0	48	0	||	Unmodulated	0.139073
chr6:57810738	chr6	57810738	-	Intron	||	Vopp1	||	14	3	3	||	0.21807	0	0.21807	||	8	20	0.4	|	5	43	0.116279	|	4	29	0.137931	||	0	14	0	|	0	26	0	|	0	53	0	||	Unmodulated	0.139225
chr18:35777927	chr18	35777927	+	Intron	||	Ube2d2a	||	6	3	3	||	0.206247	0	0.206247	||	1	6	0.166667	|	5	62	0.0806452	|	13	35	0.371429	||	0	9	0	|	0	28	0	|	0	36	0	||	Unmodulated	0.139244
chr2:119609177	chr2	119609177	-	intergenic	||	NA	||	7	3	3	||	0.17425	0	0.17425	||	2	7	0.285714	|	6	30	0.2	|	1	27	0.037037	||	0	28	0	|	0	47	0	|	0	57	0	||	Unmodulated	0.139454
chr12:11239318	chr12	11239318	-	intergenic	||	Gen1	||	26	3	3	||	0.0831941	0.0045045	0.0786896	||	3	38	0.0789474	|	6	42	0.142857	|	1	36	0.0277778	||	0	26	0	|	0	43	0	|	1	74	0.0135135	||	Unmodulated	0.139456
chr10:128799375	chr10	128799375	+	UTR	||	AC131081.1;Mmp19	||	5	3	3	||	0.362963	0	0.362963	||	4	6	0.666667	|	1	5	0.2	|	2	9	0.222222	||	0	7	0	|	0	11	0	|	0	7	0	||	Unmodulated	0.139556
chr11:80179645	chr11	80179645	+	intergenic	||	NA	||	10	3	3	||	0.210307	0	0.210307	||	2	10	0.2	|	1	16	0.0625	|	7	19	0.368421	||	0	11	0	|	0	40	0	|	0	31	0	||	Unmodulated	0.140566
chr16:32299863	chr16	32299863	+	UTR	||	Rnf168	||	35	3	3	||	0.124498	0.00555556	0.118943	||	3	35	0.0857143	|	5	79	0.0632911	|	11	49	0.22449	||	0	68	0	|	1	60	0.0166667	|	0	80	0	||	Unmodulated	0.140667
chr19:53608082	chr19	53608082	+	Intron	||	Smc3	||	4	3	2	||	0.377976	0	0.377976	||	3	6	0.5	|	1	16	0.0625	|	4	7	0.571429	||	0	4	0	|	0	9	0	|	0	6	0	||	Unmodulated	0.140695
chr4:8567683	chr4	8567683	+	Intron	||	Rab2a	||	1	2	3	||	0	0.135802	-0.135802	||	0	1	0	|	0	19	0	|	0	21	0	||	2	8	0.25	|	2	24	0.0833333	|	2	27	0.0740741	||	Unmodulated	0.140717
chr14:31700923	chr14	31700923	-	UTR	||	Ankrd28	||	38	3	3	||	0.106831	0	0.106831	||	8	44	0.181818	|	10	89	0.11236	|	1	38	0.0263158	||	0	66	0	|	0	51	0	|	0	82	0	||	Unmodulated	0.140756
chr4:8567679	chr4	8567679	+	Intron	||	Rab2a	||	1	2	3	||	0	0.135641	-0.135641	||	0	1	0	|	0	20	0	|	0	23	0	||	2	8	0.25	|	2	25	0.08	|	2	26	0.0769231	||	Unmodulated	0.141083
chr9:88850668	chr9	88850668	-	Intron	||	9330159M07Rik	||	11	3	3	||	0.29304	0	0.29304	||	4	13	0.307692	|	11	22	0.5	|	1	14	0.0714286	||	0	11	0	|	0	23	0	|	0	41	0	||	Unmodulated	0.141792
chr8:104260872	chr8	104260872	+	Intron	||	Cklf	||	13	3	3	||	0.0867303	0	0.0867303	||	2	13	0.153846	|	2	73	0.0273973	|	3	38	0.0789474	||	0	22	0	|	0	16	0	|	0	18	0	||	Unmodulated	0.14197
chr1:156427612	chr1	156427612	-	UTR	||	Soat1	||	7	3	3	||	0.524034	0	0.524034	||	9	10	0.9	|	3	23	0.130435	|	13	24	0.541667	||	0	7	0	|	0	22	0	|	0	27	0	||	Unmodulated	0.142508
chr5:34345342	chr5	34345342	+	Intron	||	Rnf4	||	8	3	3	||	0.0987013	0	0.0987013	||	2	11	0.181818	|	1	21	0.047619	|	1	15	0.0666667	||	0	8	0	|	0	15	0	|	0	11	0	||	Unmodulated	0.142752
chr2:181518265	chr2	181518265	+	intergenic	||	NA	||	9	3	3	||	0.258547	0	0.258547	||	6	13	0.461538	|	3	13	0.230769	|	1	12	0.0833333	||	0	11	0	|	0	15	0	|	0	9	0	||	Unmodulated	0.143265
chr6:92148938	chr6	92148938	+	Intron	||	Nr2c2	||	9	3	3	||	0.0842152	0.025641	0.0585741	||	2	21	0.0952381	|	2	27	0.0740741	|	1	12	0.0833333	||	0	9	0	|	0	19	0	|	2	26	0.0769231	||	Unmodulated	0.143303
chr16:32625352	chr16	32625352	+	Intron	||	Tfrc	||	45	3	3	||	0.0922391	0	0.0922391	||	8	47	0.170213	|	6	134	0.0447761	|	5	81	0.0617284	||	0	45	0	|	0	108	0	|	0	162	0	||	Unmodulated	0.14343
chr14:47400621	chr14	47400621	-	Intron	||	Dlgap5	||	4	3	2	||	0.325356	0	0.325356	||	3	5	0.6	|	2	13	0.153846	|	2	9	0.222222	||	0	4	0	|	0	13	0	|	0	12	0	||	Unmodulated	0.143653
chr9:64160442	chr9	64160442	-	Intron	||	Zwilch	||	4	3	2	||	0.268519	0.0833333	0.185185	||	2	6	0.333333	|	3	12	0.25	|	2	9	0.222222	||	1	4	0.25	|	0	12	0	|	0	9	0	||	Unmodulated	0.144003
chr3:68994125	chr3	68994125	-	Exon	||	Ift80	||	14	3	3	||	0.117588	0	0.117588	||	3	14	0.214286	|	2	44	0.0454545	|	4	43	0.0930233	||	0	14	0	|	0	31	0	|	0	49	0	||	Unmodulated	0.144205
chr5:65552485	chr5	65552485	+	Intron	||	Ube2k	||	12	3	3	||	0.0642478	0	0.0642478	||	2	17	0.117647	|	1	38	0.0263158	|	2	41	0.0487805	||	0	12	0	|	0	44	0	|	0	44	0	||	Unmodulated	0.144323
chr9:21683994	chr9	21683994	+	Intron	||	Smarca4	||	26	3	3	||	0.0227715	0	0.0227715	||	3	71	0.0422535	|	2	152	0.0131579	|	2	155	0.0129032	||	0	28	0	|	0	38	0	|	0	26	0	||	Unmodulated	0.144391
chr2:157558645	chr2	157558645	-	Intron	||	Blcap	||	2	2	3	||	0.551515	0	0.551515	||	2	2	1	|	1	5	0.2	|	5	11	0.454545	||	0	5	0	|	0	5	0	|	0	9	0	||	Unmodulated	0.144436
chr3:88352235	chr3	88352235	+	Exon	||	Smg5	||	30	3	3	||	0.0640977	0	0.0640977	||	4	34	0.117647	|	2	74	0.027027	|	2	42	0.047619	||	0	30	0	|	0	31	0	|	0	57	0	||	Unmodulated	0.144447
chr5:138649842	chr5	138649842	+	Intron	||	A430033K04Rik	||	2	3	2	||	0.434524	0.133333	0.30119	||	3	8	0.375	|	3	6	0.5	|	3	7	0.428571	||	2	5	0.4	|	0	2	0	|	0	6	0	||	Unmodulated	0.144596
chr2:126803206	chr2	126803206	-	Intron	||	Trpm7	||	14	3	3	||	0	0.144444	-0.144444	||	0	14	0	|	0	28	0	|	0	32	0	||	4	15	0.266667	|	3	45	0.0666667	|	3	30	0.1	||	Unmodulated	0.144663
chrX:150984540	chrX	150984540	-	UTR	||	Gnl3l	||	15	3	3	||	0.201858	0	0.201858	||	6	17	0.352941	|	1	19	0.0526316	|	5	25	0.2	||	0	15	0	|	0	27	0	|	0	22	0	||	Unmodulated	0.145309
chr14:86911717	chr14	86911717	-	Intron	||	Diaph3	||	8	3	3	||	0.300244	0	0.300244	||	3	10	0.3	|	2	26	0.0769231	|	11	21	0.52381	||	0	8	0	|	0	15	0	|	0	34	0	||	Unmodulated	0.145401
chr11:82962620	chr11	82962620	+	UTR	||	Slfn5	||	8	3	3	||	0.206909	0	0.206909	||	1	8	0.125	|	10	26	0.384615	|	2	18	0.111111	||	0	12	0	|	0	25	0	|	0	26	0	||	Unmodulated	0.14551
chr17:36005330	chr17	36005330	-	Intron	||	A930015D03Rik	||	15	3	3	||	0.0940821	0	0.0940821	||	1	15	0.0666667	|	2	48	0.0416667	|	4	23	0.173913	||	0	28	0	|	0	40	0	|	0	46	0	||	Unmodulated	0.146192
chr19:40741022	chr19	40741022	+	UTR	||	Entpd1	||	7	3	3	||	0.31044	0.041514	0.268926	||	1	7	0.142857	|	14	26	0.538462	|	5	20	0.25	||	1	13	0.0769231	|	1	21	0.047619	|	0	16	0	||	Unmodulated	0.146232
chr16:32299881	chr16	32299881	+	UTR	||	Rnf168	||	35	3	3	||	0.109957	0	0.109957	||	7	35	0.2	|	3	77	0.038961	|	4	44	0.0909091	||	0	63	0	|	0	55	0	|	0	73	0	||	Unmodulated	0.14642
chr11:77536054	chr11	77536054	-	UTR	||	Abhd15;Taok1	||	34	3	3	||	0.0644107	0.003663	0.0607477	||	2	34	0.0588235	|	7	62	0.112903	|	2	93	0.0215054	||	0	53	0	|	1	91	0.010989	|	0	78	0	||	Unmodulated	0.146779
chr8:110974645	chr8	110974645	-	intergenic	||	NA	||	16	3	3	||	0.164438	0	0.164438	||	7	23	0.304348	|	2	29	0.0689655	|	3	25	0.12	||	0	16	0	|	0	36	0	|	0	37	0	||	Unmodulated	0.148131
chr10:43607789	chr10	43607789	+	Intron	||	F930017D23Rik	||	21	3	3	||	0.133995	0.00980392	0.124191	||	5	21	0.238095	|	6	118	0.0508475	|	13	115	0.113043	||	1	34	0.0294118	|	0	83	0	|	0	148	0	||	Unmodulated	0.148921
chr13:21392406	chr13	21392406	-	UTR	||	Zkscan3	||	5	3	3	||	0.0790049	0	0.0790049	||	2	14	0.142857	|	1	41	0.0243902	|	3	43	0.0697674	||	0	5	0	|	0	16	0	|	0	24	0	||	Unmodulated	0.14923
chr5:34490935	chr5	34490935	+	intergenic	||	NA	||	3	2	3	||	0.397222	0.0555556	0.341667	||	2	3	0.666667	|	1	8	0.125	|	4	10	0.4	||	0	5	0	|	1	6	0.166667	|	0	9	0	||	Unmodulated	0.149765
chr15:99642060	chr15	99642060	-	Intron	||	Racgap1	||	3	2	3	||	0.180952	0	0.180952	||	1	3	0.333333	|	2	14	0.142857	|	1	15	0.0666667	||	0	5	0	|	0	10	0	|	0	24	0	||	Unmodulated	0.150011
chr13:67473391	chr13	67473391	-	UTR	||	AC154510.1;Zfp874b	||	2	3	2	||	0.242593	0	0.242593	||	2	10	0.2	|	1	12	0.0833333	|	4	9	0.444444	||	0	2	0	|	0	5	0	|	0	8	0	||	Unmodulated	0.150192
chr7:27821533	chr7	27821533	+	intergenic	||	Zfp626	||	18	3	3	||	0.091746	0	0.091746	||	3	18	0.166667	|	1	35	0.0285714	|	4	50	0.08	||	0	18	0	|	0	28	0	|	0	37	0	||	Unmodulated	0.150525
chr10:58406464	chr10	58406464	+	Intron	||	Lims1	||	20	3	3	||	0.0872183	0.0144928	0.0727256	||	3	22	0.136364	|	4	39	0.102564	|	1	44	0.0227273	||	0	20	0	|	2	46	0.0434783	|	0	44	0	||	Unmodulated	0.151169
chr9:65906718	chr9	65906718	+	Intron	||	Trip4	||	6	3	3	||	0.362847	0	0.362847	||	4	6	0.666667	|	4	32	0.125	|	19	64	0.296875	||	0	13	0	|	0	65	0	|	0	121	0	||	Unmodulated	0.151185
chr9:96057202	chr9	96057202	+	UTR	||	Xrn1	||	17	3	3	||	0.062824	0	0.062824	||	2	17	0.117647	|	3	71	0.0422535	|	1	35	0.0285714	||	0	36	0	|	0	60	0	|	0	55	0	||	Unmodulated	0.151402
chrX:134323155	chrX	134323155	+	Intron	||	Cenpi	||	7	3	3	||	0.304762	0	0.304762	||	4	7	0.571429	|	2	14	0.142857	|	3	15	0.2	||	0	7	0	|	0	24	0	|	0	19	0	||	Unmodulated	0.151406
chr9:73058028	chr9	73058028	+	Intron	||	Rab27a	||	3	3	2	||	0.106433	0	0.106433	||	1	5	0.2	|	1	19	0.0526316	|	1	15	0.0666667	||	0	3	0	|	0	7	0	|	0	16	0	||	Unmodulated	0.151605
chr14:21797711	chr14	21797711	+	UTR	||	Samd8	||	19	3	3	||	0.23251	0.0175439	0.214966	||	8	19	0.421053	|	4	39	0.102564	|	4	23	0.173913	||	1	19	0.0526316	|	0	39	0	|	0	34	0	||	Unmodulated	0.151809
chr6:120955482	chr6	120955482	-	Intron	||	Mical3	||	9	3	3	||	0.208689	0	0.208689	||	7	18	0.388889	|	1	12	0.0833333	|	2	13	0.153846	||	0	29	0	|	0	9	0	|	0	21	0	||	Unmodulated	0.152368
chr8:107335106	chr8	107335106	+	Intron	||	Nfat5	||	11	3	3	||	0.0215278	0.0920906	-0.0705628	||	0	11	0	|	1	32	0.03125	|	1	30	0.0333333	||	2	13	0.153846	|	3	38	0.0789474	|	1	23	0.0434783	||	Unmodulated	0.152507
chr19:7535250	chr19	7535250	+	UTR	||	Atl3	||	40	3	3	||	0.172691	0	0.172691	||	1	40	0.025	|	26	123	0.211382	|	20	71	0.28169	||	0	77	0	|	0	98	0	|	0	97	0	||	Unmodulated	0.152828
chr2:166882672	chr2	166882672	+	Intron	||	Arfgef2	||	4	3	2	||	0.111255	0.281746	-0.170491	||	1	7	0.142857	|	2	20	0.1	|	1	11	0.0909091	||	3	7	0.428571	|	1	4	0.25	|	1	6	0.166667	||	Unmodulated	0.153123
chr2:119106992	chr2	119106992	+	intergenic	||	NA	||	8	3	3	||	0.11461	0	0.11461	||	3	17	0.176471	|	1	74	0.0135135	|	2	13	0.153846	||	0	8	0	|	0	13	0	|	0	60	0	||	Unmodulated	0.153495
chr12:76600995	chr12	76600995	-	Intron	||	Sptb	||	24	3	3	||	0.0592593	0	0.0592593	||	1	24	0.0416667	|	1	40	0.025	|	3	27	0.111111	||	0	28	0	|	0	44	0	|	0	63	0	||	Unmodulated	0.153635
chr2:119106991	chr2	119106991	+	intergenic	||	NA	||	7	3	3	||	0.249011	0	0.249011	||	3	17	0.176471	|	8	77	0.103896	|	7	15	0.466667	||	0	7	0	|	0	13	0	|	0	61	0	||	Unmodulated	0.153686
chr5:123403518	chr5	123403518	+	Intron	||	Mlxip	||	6	3	3	||	0.153501	0	0.153501	||	2	7	0.285714	|	2	35	0.0571429	|	2	17	0.117647	||	0	6	0	|	0	7	0	|	0	9	0	||	Unmodulated	0.153886
chr11:3318988	chr11	3318988	+	Intron	||	Gm11944;Gm12592	||	1	3	2	||	0.247286	0.0333333	0.213953	||	4	9	0.444444	|	5	29	0.172414	|	1	8	0.125	||	0	1	0	|	0	11	0	|	1	10	0.1	||	Unmodulated	0.154752
chr2:31030943	chr2	31030943	-	UTR	||	Fnbp1	||	7	3	3	||	0.441558	0.104906	0.336652	||	5	7	0.714286	|	4	22	0.181818	|	12	28	0.428571	||	1	11	0.0909091	|	2	35	0.0571429	|	2	12	0.166667	||	Unmodulated	0.155129
chr15:100255492	chr15	100255492	+	Intron	||	Atf1	||	3	2	3	||	0.437802	0.09375	0.344052	||	2	3	0.666667	|	2	16	0.125	|	12	23	0.521739	||	2	8	0.25	|	1	32	0.03125	|	0	15	0	||	Unmodulated	0.155258
chr3:129985310	chr3	129985310	-	Intron	||	Sec24b	||	4	2	3	||	0.125	0.314815	-0.189815	||	2	8	0.25	|	1	8	0.125	|	0	4	0	||	4	9	0.444444	|	2	6	0.333333	|	1	6	0.166667	||	Unmodulated	0.155359
chr11:6260895	chr11	6260895	-	Intron	||	Ddx56	||	4	2	3	||	0.402882	0	0.402882	||	3	4	0.75	|	6	19	0.315789	|	2	14	0.142857	||	0	11	0	|	0	8	0	|	0	5	0	||	Unmodulated	0.155411
chr12:55742242	chr12	55742242	-	Intron	||	Ralgapa1	||	0	3	2	||	0.318519	0	0.318519	||	3	5	0.6	|	2	15	0.133333	|	2	9	0.222222	||	0	0	NA	|	0	7	0	|	0	8	0	||	Unmodulated	0.155889
chr11:23339485	chr11	23339485	+	Intron	||	Usp34	||	3	2	2	||	0.132107	0	0.132107	||	1	4	0.25	|	3	35	0.0857143	|	2	33	0.0606061	||	0	3	0	|	0	16	0	|	0	16	0	||	Unmodulated	0.156116
chr5:30904077	chr5	30904077	-	Intron	||	Agbl5	||	4	3	2	||	0.263889	0	0.263889	||	4	8	0.5	|	1	8	0.125	|	2	12	0.166667	||	0	4	0	|	0	12	0	|	0	24	0	||	Unmodulated	0.15618
chr2:120602233	chr2	120602233	+	intergenic	||	NA	||	15	3	3	||	0.0703486	0	0.0703486	||	2	15	0.133333	|	1	31	0.0322581	|	1	22	0.0454545	||	0	21	0	|	0	31	0	|	0	28	0	||	Unmodulated	0.15685
chr2:181518255	chr2	181518255	+	intergenic	||	NA	||	10	3	3	||	0.202953	0	0.202953	||	5	13	0.384615	|	2	15	0.133333	|	1	11	0.0909091	||	0	11	0	|	0	17	0	|	0	10	0	||	Unmodulated	0.157216
chr15:44463520	chr15	44463520	+	Intron	||	Pkhd1l1	||	3	3	2	||	0.39372	0	0.39372	||	1	9	0.111111	|	13	18	0.722222	|	8	23	0.347826	||	0	3	0	|	0	9	0	|	0	11	0	||	Unmodulated	0.157346
chr2:160680434	chr2	160680434	+	Intron	||	Top1	||	10	3	3	||	0.0700483	0	0.0700483	||	2	15	0.133333	|	2	46	0.0434783	|	1	30	0.0333333	||	0	10	0	|	0	25	0	|	0	25	0	||	Unmodulated	0.158327
chr3:88352181	chr3	88352181	+	Exon	||	Smg5	||	40	3	3	||	0.171609	0.0325203	0.139088	||	13	43	0.302326	|	7	80	0.0875	|	6	48	0.125	||	0	40	0	|	4	41	0.097561	|	0	47	0	||	Unmodulated	0.158783
chr9:58630928	chr9	58630928	+	Intron	||	Nptn	||	4	2	3	||	0.495098	0.163358	0.33174	||	3	4	0.75	|	4	17	0.235294	|	5	10	0.5	||	6	15	0.4	|	1	17	0.0588235	|	1	32	0.03125	||	Unmodulated	0.159462
chr7:15994735	chr7	15994735	-	Intron	||	Bicra	||	8	3	3	||	0.0720223	0	0.0720223	||	3	23	0.130435	|	1	60	0.0166667	|	2	29	0.0689655	||	0	11	0	|	0	14	0	|	0	8	0	||	Unmodulated	0.159862
chr4:117837942	chr4	117837942	+	Intron	||	Gm17114;Slc6a9	||	8	3	3	||	0.325226	0	0.325226	||	8	13	0.615385	|	2	16	0.125	|	4	17	0.235294	||	0	8	0	|	0	30	0	|	0	41	0	||	Unmodulated	0.159977
chr2:31030369	chr2	31030369	-	UTR	||	Fnbp1	||	7	3	3	||	0.13254	0	0.13254	||	1	10	0.1	|	3	12	0.25	|	1	21	0.047619	||	0	7	0	|	0	16	0	|	0	15	0	||	Unmodulated	0.160444
chr4:48466553	chr4	48466553	-	Intron	||	Tex10	||	11	3	3	||	0.144483	0.0196078	0.124875	||	1	12	0.0833333	|	2	23	0.0869565	|	5	19	0.263158	||	0	11	0	|	2	34	0.0588235	|	0	23	0	||	Unmodulated	0.160677
chr13:59794667	chr13	59794667	-	Intron	||	Zcchc6	||	71	3	3	||	0.0468348	0.00401606	0.0428188	||	6	71	0.084507	|	2	122	0.0163934	|	4	101	0.039604	||	1	83	0.0120482	|	0	85	0	|	0	168	0	||	Unmodulated	0.160992
chr8:84205057	chr8	84205057	+	intergenic	||	NA	||	4	3	2	||	0.185185	0.05	0.135185	||	2	8	0.25	|	2	36	0.0555556	|	4	16	0.25	||	0	4	0	|	1	15	0.0666667	|	1	12	0.0833333	||	Unmodulated	0.161384
chr12:84341954	chr12	84341954	+	Intron	||	Zfp410	||	0	3	2	||	0.260965	0	0.260965	||	3	6	0.5	|	3	19	0.157895	|	2	16	0.125	||	0	0	NA	|	0	13	0	|	0	19	0	||	Unmodulated	0.161452
chr3:35899293	chr3	35899293	-	Intron	||	Dcun1d1	||	6	3	3	||	0.150794	0	0.150794	||	2	7	0.285714	|	1	18	0.0555556	|	2	18	0.111111	||	0	14	0	|	0	6	0	|	0	23	0	||	Unmodulated	0.161674
chr2:167588006	chr2	167588006	-	Intron	||	Gm11476	||	7	3	3	||	0.0606061	0.221463	-0.160857	||	2	11	0.181818	|	0	20	0	|	0	14	0	||	1	7	0.142857	|	4	11	0.363636	|	3	19	0.157895	||	Unmodulated	0.162362
chr11:106896309	chr11	106896309	-	Intron	||	Smurf2	||	5	3	3	||	0.0666667	0.205556	-0.138889	||	1	5	0.2	|	0	10	0	|	0	11	0	||	1	6	0.166667	|	2	8	0.25	|	2	10	0.2	||	Unmodulated	0.162413
chr18:56908870	chr18	56908870	-	Intron	||	2003-03-01	||	38	3	3	||	0.0538379	0.0185632	0.0352747	||	2	55	0.0363636	|	13	196	0.0663265	|	15	255	0.0588235	||	2	38	0.0526316	|	0	218	0	|	1	327	0.0030581	||	Unmodulated	0.163811
chr6:47871360	chr6	47871360	+	intergenic	||	Zfp398	||	4	2	3	||	0.131818	0	0.131818	||	1	4	0.25	|	4	40	0.1	|	1	22	0.0454545	||	0	7	0	|	0	27	0	|	0	23	0	||	Unmodulated	0.163887
chr7:80712283	chr7	80712283	-	UTR	||	Iqgap1	||	30	3	3	||	0.0374589	0	0.0374589	||	2	58	0.0344828	|	1	112	0.00892857	|	4	58	0.0689655	||	0	60	0	|	0	30	0	|	0	42	0	||	Unmodulated	0.164134
chr3:88401876	chr3	88401876	-	Intron	||	Pmf1	||	7	3	3	||	0.188552	0	0.188552	||	4	11	0.363636	|	3	27	0.111111	|	1	11	0.0909091	||	0	7	0	|	0	14	0	|	0	40	0	||	Unmodulated	0.164644
chr4:109332887	chr4	109332887	+	Intron	||	Eps15	||	6	3	3	||	0.0416667	0.127525	-0.0858586	||	1	8	0.125	|	0	13	0	|	0	18	0	||	1	6	0.166667	|	2	22	0.0909091	|	2	16	0.125	||	Unmodulated	0.164849
chr7:127556549	chr7	127556549	+	Intron	||	Gm42715;Srcap	||	4	2	3	||	0.129365	0	0.129365	||	1	4	0.25	|	1	14	0.0714286	|	1	15	0.0666667	||	0	6	0	|	0	7	0	|	0	8	0	||	Unmodulated	0.165221
chr18:36599180	chr18	36599180	+	Intron	||	Ankhd1	||	3	2	2	||	0.316667	0	0.316667	||	3	5	0.6	|	1	4	0.25	|	1	10	0.1	||	0	3	0	|	0	11	0	|	0	18	0	||	Unmodulated	0.165993
chr7:102473397	chr7	102473397	+	intergenic	||	NA	||	2	3	2	||	0.259259	0	0.259259	||	1	6	0.166667	|	6	12	0.5	|	1	9	0.111111	||	0	2	0	|	0	7	0	|	0	22	0	||	Unmodulated	0.166312
chr17:47552615	chr17	47552615	+	Intron	||	Ccnd3	||	9	3	3	||	0.0215054	0.135773	-0.114267	||	0	26	0	|	0	114	0	|	2	31	0.0645161	||	2	13	0.153846	|	1	32	0.03125	|	2	9	0.222222	||	Unmodulated	0.167079
chr15:98558321	chr15	98558321	-	Intron	||	Ccnt1	||	18	3	3	||	0.243525	0.037037	0.206488	||	8	19	0.421053	|	4	56	0.0714286	|	10	42	0.238095	||	2	18	0.111111	|	0	43	0	|	0	48	0	||	Unmodulated	0.167526
chr17:25929317	chr17	25929317	-	Intron	||	Gm16278;Gm26694;Pigq	||	35	3	3	||	0.222749	0	0.222749	||	15	35	0.428571	|	11	71	0.15493	|	5	59	0.0847458	||	0	55	0	|	0	43	0	|	0	71	0	||	Unmodulated	0.167662
chr16:32299923	chr16	32299923	+	UTR	||	Rnf168	||	16	3	3	||	0.173611	0	0.173611	||	1	16	0.0625	|	7	21	0.333333	|	2	16	0.125	||	0	16	0	|	0	24	0	|	0	31	0	||	Unmodulated	0.168052
chr6:116384880	chr6	116384880	+	Intron	||	2008-03-01	||	2	3	2	||	0.212458	0	0.212458	||	2	5	0.4	|	4	22	0.181818	|	1	18	0.0555556	||	0	2	0	|	0	8	0	|	0	20	0	||	Unmodulated	0.169106
chr9:20939603	chr9	20939603	-	Intron	||	Dnmt1	||	4	2	3	||	0.167874	0.0615079	0.106366	||	1	4	0.25	|	2	23	0.0869565	|	4	24	0.166667	||	0	5	0	|	2	14	0.142857	|	1	24	0.0416667	||	Unmodulated	0.169277
chr1:86350105	chr1	86350105	-	UTR	||	Ncl	||	65	3	3	||	0.0291181	0	0.0291181	||	1	66	0.0151515	|	5	88	0.0568182	|	1	65	0.0153846	||	0	65	0	|	0	87	0	|	0	79	0	||	Unmodulated	0.170259
chr12:73946423	chr12	73946423	+	UTR	||	AC124712.1;Gm15283;Hif1a	||	35	3	3	||	0.049327	0	0.049327	||	5	52	0.0961538	|	1	43	0.0232558	|	1	35	0.0285714	||	0	55	0	|	0	53	0	|	0	45	0	||	Unmodulated	0.17027
chr14:47400620	chr14	47400620	-	Intron	||	Dlgap5	||	4	2	2	||	0.38468	0	0.38468	||	3	4	0.75	|	2	11	0.181818	|	2	9	0.222222	||	0	4	0	|	0	12	0	|	0	12	0	||	Unmodulated	0.170339
chr1:36880246	chr1	36880246	-	Intron	||	Tmem131	||	11	3	3	||	0.236153	0	0.236153	||	5	11	0.454545	|	4	23	0.173913	|	2	25	0.08	||	0	12	0	|	0	30	0	|	0	35	0	||	Unmodulated	0.170682
chr4:155822784	chr4	155822784	+	Intron	||	Ccnl2	||	6	3	3	||	0.178293	0	0.178293	||	7	22	0.318182	|	1	41	0.0243902	|	5	26	0.192308	||	0	6	0	|	0	25	0	|	0	22	0	||	Unmodulated	0.171153
chr11:82963224	chr11	82963224	+	intergenic	||	Slfn5	||	6	3	3	||	0.14709	0	0.14709	||	2	7	0.285714	|	3	30	0.1	|	1	18	0.0555556	||	0	14	0	|	0	20	0	|	0	6	0	||	Unmodulated	0.172201
chr2:120602271	chr2	120602271	+	intergenic	||	NA	||	9	3	3	||	0.226852	0	0.226852	||	4	9	0.444444	|	3	27	0.111111	|	2	16	0.125	||	0	16	0	|	0	28	0	|	0	22	0	||	Unmodulated	0.172576
chr17:28986548	chr17	28986548	-	Intron	||	Stk38	||	9	3	3	||	0	0.0510738	-0.0510738	||	0	9	0	|	0	49	0	|	0	32	0	||	2	20	0.1	|	1	34	0.0294118	|	1	42	0.0238095	||	Unmodulated	0.172633
chr1:143755383	chr1	143755383	-	UTR	||	Trove2	||	5	3	3	||	0.378388	0.047619	0.330769	||	1	7	0.142857	|	9	30	0.3	|	9	13	0.692308	||	0	14	0	|	2	14	0.142857	|	0	5	0	||	Unmodulated	0.172688
chr17:35858897	chr17	35858897	+	UTR	||	Mdc1	||	34	3	3	||	0.122062	0.0460784	0.0759837	||	7	41	0.170732	|	3	60	0.05	|	8	55	0.145455	||	2	40	0.05	|	3	34	0.0882353	|	0	84	0	||	Unmodulated	0.173504
chr4:11236954	chr4	11236954	-	Intron	||	Ints8	||	6	3	3	||	0.128165	0	0.128165	||	4	16	0.25	|	3	35	0.0857143	|	2	41	0.0487805	||	0	6	0	|	0	28	0	|	0	21	0	||	Unmodulated	0.173997
chr8:78619938	chr8	78619938	+	Intron	||	Slc10a7	||	5	3	3	||	0.369444	0.0555556	0.313889	||	2	5	0.4	|	1	12	0.0833333	|	10	16	0.625	||	1	6	0.166667	|	0	7	0	|	0	14	0	||	Unmodulated	0.174577
chr7:97130247	chr7	97130247	+	Intron	||	Gab2	||	5	3	3	||	0.015873	0.262527	-0.246654	||	0	5	0	|	1	21	0.047619	|	0	6	0	||	6	12	0.5	|	3	17	0.176471	|	1	9	0.111111	||	Unmodulated	0.174652
chr17:6122608	chr17	6122608	+	Exon	||	Tulp4	||	2	2	2	||	0.511111	0	0.511111	||	4	4	1	|	3	15	0.2	|	2	6	0.333333	||	0	5	0	|	0	5	0	|	0	2	0	||	Unmodulated	0.17488
chr5:3785994	chr5	3785994	-	Intron	||	Ankib1	||	4	3	2	||	0.296296	0.0833333	0.212963	||	3	9	0.333333	|	1	9	0.111111	|	4	9	0.444444	||	1	4	0.25	|	0	7	0	|	0	9	0	||	Unmodulated	0.174985
chr2:121544352	chr2	121544352	+	UTR	||	Wdr76	||	6	3	3	||	0.259921	0	0.259921	||	3	6	0.5	|	5	24	0.208333	|	1	14	0.0714286	||	0	21	0	|	0	33	0	|	0	37	0	||	Unmodulated	0.176003
chr7:127520493	chr7	127520493	+	Intron	||	Gm42715;Srcap	||	6	3	3	||	0.113604	0	0.113604	||	2	9	0.222222	|	1	24	0.0416667	|	2	26	0.0769231	||	0	8	0	|	0	6	0	|	0	17	0	||	Unmodulated	0.17609
chr9:72673228	chr9	72673228	+	Intron	||	Nedd4	||	14	3	3	||	0.098852	0.0266667	0.0721854	||	2	14	0.142857	|	6	49	0.122449	|	1	32	0.03125	||	2	25	0.08	|	0	23	0	|	0	25	0	||	Unmodulated	0.176346
chr4:58808724	chr4	58808724	-	Intron	||	AI314180	||	12	3	3	||	0.364358	0.167929	0.196429	||	6	12	0.5	|	7	33	0.212121	|	8	21	0.380952	||	4	12	0.333333	|	1	22	0.0454545	|	3	24	0.125	||	Unmodulated	0.176357
chr13:21392323	chr13	21392323	-	UTR	||	Zkscan3	||	11	3	3	||	0.0911801	0	0.0911801	||	3	17	0.176471	|	4	56	0.0714286	|	1	39	0.025641	||	0	11	0	|	0	23	0	|	0	24	0	||	Unmodulated	0.177872
chr4:41362845	chr4	41362845	+	Intron	||	Ubap1	||	1	2	2	||	0.263636	0.0175439	0.246093	||	1	2	0.5	|	1	11	0.0909091	|	1	5	0.2	||	0	1	0	|	1	19	0.0526316	|	0	27	0	||	Unmodulated	0.179575
chr9:96057248	chr9	96057248	+	UTR	||	Xrn1	||	18	3	3	||	0.0563272	0	0.0563272	||	2	18	0.111111	|	1	48	0.0208333	|	1	27	0.037037	||	0	28	0	|	0	46	0	|	0	49	0	||	Unmodulated	0.179879
chr3:104858232	chr3	104858232	-	Intron	||	Capza1	||	7	3	3	||	0.148399	0	0.148399	||	2	7	0.285714	|	2	16	0.125	|	1	29	0.0344828	||	0	7	0	|	0	22	0	|	0	17	0	||	Unmodulated	0.180798
chr14:52293454	chr14	52293454	+	UTR	||	Tox4	||	47	3	3	||	0.0873441	0	0.0873441	||	9	55	0.163636	|	1	72	0.0138889	|	6	71	0.084507	||	0	47	0	|	0	65	0	|	0	65	0	||	Unmodulated	0.180883
chr7:127520429	chr7	127520429	+	Intron	||	Gm42715;Srcap	||	3	2	3	||	0.336111	0	0.336111	||	2	3	0.666667	|	5	24	0.208333	|	2	15	0.133333	||	0	10	0	|	0	11	0	|	0	19	0	||	Unmodulated	0.181292
chr11:99004807	chr11	99004807	-	Intron	||	Top2a	||	16	3	3	||	0.0949918	0	0.0949918	||	3	16	0.1875	|	3	93	0.0322581	|	3	46	0.0652174	||	0	16	0	|	0	42	0	|	0	84	0	||	Unmodulated	0.181937
chr10:58407765	chr10	58407765	+	Intron	||	Lims1	||	19	3	3	||	0.0545209	0.0182648	0.0362561	||	1	32	0.03125	|	2	31	0.0645161	|	4	59	0.0677966	||	0	19	0	|	4	73	0.0547945	|	0	67	0	||	Unmodulated	0.182173
chr9:58635186	chr9	58635186	+	Intron	||	Nptn	||	16	3	3	||	0.125545	0.0166667	0.108878	||	6	27	0.222222	|	1	34	0.0294118	|	2	16	0.125	||	1	20	0.05	|	0	23	0	|	0	32	0	||	Unmodulated	0.182259
chr17:6081204	chr17	6081204	+	Exon	||	Gtf2h5	||	7	3	3	||	0.735931	0.472222	0.263709	||	4	7	0.571429	|	8	8	1	|	7	11	0.636364	||	5	10	0.5	|	5	12	0.416667	|	4	8	0.5	||	Unmodulated	0.18227
chr17:5688397	chr17	5688397	+	Intron	||	Zdhhc14	||	10	3	3	||	0.690476	0.38499	0.305486	||	8	14	0.571429	|	16	16	1	|	15	30	0.5	||	5	10	0.5	|	4	19	0.210526	|	12	27	0.444444	||	Unmodulated	0.182553
chr12:101919872	chr12	101919872	-	UTR	||	Atxn3	||	21	3	3	||	0.0839605	0.0146587	0.0693018	||	2	21	0.0952381	|	9	65	0.138462	|	1	55	0.0181818	||	1	37	0.027027	|	0	58	0	|	1	59	0.0169492	||	Unmodulated	0.182764
chr16:55901767	chr16	55901767	-	UTR	||	Cep97	||	10	3	3	||	0.100084	0	0.100084	||	2	10	0.2	|	1	21	0.047619	|	1	19	0.0526316	||	0	11	0	|	0	16	0	|	0	15	0	||	Unmodulated	0.183163
chr2:163467539	chr2	163467539	-	UTR	||	Fitm2	||	3	2	2	||	0	0.222222	-0.222222	||	0	7	0	|	0	4	0	|	0	5	0	||	1	3	0.333333	|	2	6	0.333333	|	0	6	0	||	Unmodulated	0.183503
chr1:52474213	chr1	52474213	-	Intron	||	Nab1	||	3	2	2	||	0	0.111111	-0.111111	||	0	3	0	|	0	5	0	|	0	7	0	||	1	6	0.166667	|	1	6	0.166667	|	0	3	0	||	Unmodulated	0.183503
chr10:95945882	chr10	95945882	+	Intron	||	Eea1	||	2	3	2	||	0.0350877	0	0.0350877	||	0	7	0	|	1	19	0.0526316	|	1	19	0.0526316	||	0	2	0	|	0	10	0	|	0	19	0	||	Unmodulated	0.183503
chr11:4767141	chr11	4767141	-	UTR	||	Nf2	||	13	3	3	||	0.0512821	0	0.0512821	||	1	13	0.0769231	|	2	26	0.0769231	|	0	34	0	||	0	28	0	|	0	27	0	|	0	49	0	||	Unmodulated	0.183503
chr1:86348806	chr1	86348806	-	UTR	||	Ncl	||	7	3	3	||	0.0533333	0	0.0533333	||	0	7	0	|	2	25	0.08	|	2	25	0.08	||	0	21	0	|	0	33	0	|	0	39	0	||	Unmodulated	0.183503
chr8:60974259	chr8	60974259	-	Intron	||	Clcn3	||	10	3	3	||	0.0740741	0	0.0740741	||	2	18	0.111111	|	0	31	0	|	4	36	0.111111	||	0	10	0	|	0	36	0	|	0	49	0	||	Unmodulated	0.183503
chr7:114459935	chr7	114459935	+	Intron	||	Pde3b	||	4	3	2	||	0.0952381	0	0.0952381	||	1	7	0.142857	|	0	10	0	|	2	14	0.142857	||	0	4	0	|	0	13	0	|	0	6	0	||	Unmodulated	0.183503
chr8:94607142	chr8	94607142	+	Intron	||	Rspry1	||	4	3	2	||	0.0952381	0	0.0952381	||	1	7	0.142857	|	1	7	0.142857	|	0	8	0	||	0	4	0	|	0	10	0	|	0	10	0	||	Unmodulated	0.183503
chr19:45517886	chr19	45517886	+	Intron	||	Btrc	||	7	3	3	||	0.111111	0	0.111111	||	3	18	0.166667	|	4	24	0.166667	|	0	18	0	||	0	7	0	|	0	12	0	|	0	26	0	||	Unmodulated	0.183503
chr2:181518222	chr2	181518222	+	intergenic	||	NA	||	10	3	3	||	0.111111	0	0.111111	||	2	12	0.166667	|	0	17	0	|	2	12	0.166667	||	0	15	0	|	0	15	0	|	0	10	0	||	Unmodulated	0.183503
chr2:154587092	chr2	154587092	-	UTR	||	Pxmp4	||	5	3	3	||	0.133333	0	0.133333	||	1	5	0.2	|	0	6	0	|	1	5	0.2	||	0	5	0	|	0	6	0	|	0	7	0	||	Unmodulated	0.183503
chr3:30804510	chr3	30804510	+	Intron	||	Sec62	||	4	2	3	||	0.0833333	0	0.0833333	||	0	4	0	|	2	16	0.125	|	1	8	0.125	||	0	5	0	|	0	25	0	|	0	31	0	||	Unmodulated	0.183503
chr7:102471862	chr7	102471862	+	intergenic	||	NA	||	4	2	3	||	0.166667	0	0.166667	||	1	4	0.25	|	3	12	0.25	|	0	8	0	||	0	5	0	|	0	9	0	|	0	13	0	||	Unmodulated	0.183503
chr2:26926451	chr2	26926451	-	Intron	||	Surf4	||	5	3	3	||	0.333333	0	0.333333	||	3	6	0.5	|	0	5	0	|	4	8	0.5	||	0	7	0	|	0	11	0	|	0	5	0	||	Unmodulated	0.183503
chr8:94017321	chr8	94017321	-	intergenic	||	Nudt21	||	11	3	3	||	0.228114	0	0.228114	||	1	11	0.0909091	|	5	36	0.138889	|	5	11	0.454545	||	0	11	0	|	0	12	0	|	0	18	0	||	Unmodulated	0.183509
chr18:32102911	chr18	32102911	+	UTR	||	Iws1	||	16	3	3	||	0.062996	0	0.062996	||	0	16	0	|	3	32	0.09375	|	2	21	0.0952381	||	0	23	0	|	0	23	0	|	0	18	0	||	Unmodulated	0.183529
chr10:78186146	chr10	78186146	-	intergenic	||	NA	||	4	3	2	||	0.12013	0	0.12013	||	0	5	0	|	5	28	0.178571	|	2	11	0.181818	||	0	21	0	|	0	4	0	|	0	12	0	||	Unmodulated	0.183537
chr14:31700922	chr14	31700922	-	UTR	||	Ankrd28	||	38	3	3	||	0.0718949	0	0.0718949	||	6	42	0.142857	|	4	86	0.0465116	|	1	38	0.0263158	||	0	65	0	|	0	52	0	|	0	78	0	||	Unmodulated	0.183575
chr17:13020011	chr17	13020011	+	intergenic	||	NA	||	8	3	3	||	0.145503	0	0.145503	||	2	9	0.222222	|	3	14	0.214286	|	0	8	0	||	0	14	0	|	0	53	0	|	0	24	0	||	Unmodulated	0.183638
chr9:21907835	chr9	21907835	-	UTR	||	Rab3d	||	13	3	3	||	0.0816667	0	0.0816667	||	0	14	0	|	4	32	0.125	|	3	25	0.12	||	0	13	0	|	0	20	0	|	0	49	0	||	Unmodulated	0.183673
chr6:57809932	chr6	57809932	-	Intron	||	Vopp1	||	13	3	3	||	0.0220521	0	0.0220521	||	0	14	0	|	2	59	0.0338983	|	1	31	0.0322581	||	0	13	0	|	0	46	0	|	0	55	0	||	Unmodulated	0.183754
chr14:26611688	chr14	26611688	+	Intron	||	Dennd6a	||	12	3	3	||	0	0.0360624	-0.0360624	||	0	13	0	|	0	26	0	|	0	12	0	||	1	18	0.0555556	|	2	38	0.0526316	|	0	25	0	||	Unmodulated	0.183801
chr14:16302138	chr14	16302138	+	Intron	||	Ngly1	||	6	3	3	||	0.0360624	0	0.0360624	||	0	9	0	|	1	18	0.0555556	|	1	19	0.0526316	||	0	6	0	|	0	10	0	|	0	12	0	||	Unmodulated	0.183801
chr9:66017289	chr9	66017289	+	Intron	||	Csnk1g1	||	4	2	3	||	0	0.0894553	-0.0894553	||	0	4	0	|	0	21	0	|	0	19	0	||	3	23	0.130435	|	4	29	0.137931	|	0	8	0	||	Unmodulated	0.183822
chr11:4478689	chr11	4478689	-	intergenic	||	NA	||	10	3	3	||	0.0381264	0	0.0381264	||	0	10	0	|	2	34	0.0588235	|	1	18	0.0555556	||	0	11	0	|	0	25	0	|	0	38	0	||	Unmodulated	0.183836
chr4:124944376	chr4	124944376	+	Exon	||	9930104L06Rik	||	8	3	3	||	0.0381264	0	0.0381264	||	0	11	0	|	1	17	0.0588235	|	1	18	0.0555556	||	0	8	0	|	0	13	0	|	0	19	0	||	Unmodulated	0.183836
chr4:149118210	chr4	149118210	+	UTR	||	Dffa	||	8	3	3	||	0.152505	0	0.152505	||	0	8	0	|	4	17	0.235294	|	2	9	0.222222	||	0	18	0	|	0	12	0	|	0	8	0	||	Unmodulated	0.183836
chr8:104259948	chr8	104259948	+	Intron	||	Cklf	||	8	3	3	||	0.0202206	0	0.0202206	||	0	13	0	|	1	34	0.0294118	|	1	32	0.03125	||	0	18	0	|	0	8	0	|	0	24	0	||	Unmodulated	0.183878
chr7:127526687	chr7	127526687	+	Exon	||	Gm42715;Srcap	||	9	3	3	||	0.0404412	0	0.0404412	||	1	17	0.0588235	|	0	20	0	|	1	16	0.0625	||	0	9	0	|	0	12	0	|	0	14	0	||	Unmodulated	0.183878
chr9:100675848	chr9	100675848	+	Intron	||	Stag1	||	3	3	2	||	0.0690476	0	0.0690476	||	0	6	0	|	3	28	0.107143	|	3	30	0.1	||	0	3	0	|	0	16	0	|	0	20	0	||	Unmodulated	0.183988
chr7:55977221	chr7	55977221	-	Intron	||	A230056P14Rik	||	0	3	2	||	0.138095	0	0.138095	||	2	10	0.2	|	3	14	0.214286	|	0	5	0	||	0	7	0	|	0	0	NA	|	0	8	0	||	Unmodulated	0.183988
chr5:135408855	chr5	135408855	-	UTR	||	Hip1	||	7	3	3	||	0.0920635	0	0.0920635	||	2	14	0.142857	|	0	7	0	|	2	15	0.133333	||	0	17	0	|	0	20	0	|	0	14	0	||	Unmodulated	0.183988
chr3:96625809	chr3	96625809	+	UTR	||	6330549D23Rik;Lix1l	||	10	3	3	||	0.0920635	0	0.0920635	||	3	21	0.142857	|	0	19	0	|	2	15	0.133333	||	0	34	0	|	0	12	0	|	0	10	0	||	Unmodulated	0.183988
chr16:32300267	chr16	32300267	+	UTR	||	Rnf168	||	51	3	3	||	0.0715198	0	0.0715198	||	6	58	0.103448	|	7	63	0.111111	|	0	51	0	||	0	70	0	|	0	62	0	|	0	80	0	||	Unmodulated	0.184024
chr2:126892804	chr2	126892804	-	UTR	||	Sppl2a	||	19	3	3	||	0.0160853	0	0.0160853	||	0	22	0	|	1	40	0.025	|	1	43	0.0232558	||	0	34	0	|	0	19	0	|	0	33	0	||	Unmodulated	0.184036
chr2:18214729	chr2	18214729	-	UTR	||	Dnajc1	||	9	3	3	||	0.0494505	0	0.0494505	||	1	13	0.0769231	|	0	14	0	|	1	14	0.0714286	||	0	9	0	|	0	15	0	|	0	16	0	||	Unmodulated	0.184063
chr12:83818903	chr12	83818903	-	Intron	||	Numb	||	4	3	2	||	0	0.0534188	-0.0534188	||	0	5	0	|	0	14	0	|	0	16	0	||	0	4	0	|	1	13	0.0769231	|	2	24	0.0833333	||	Unmodulated	0.184156
chr10:58338340	chr10	58338340	+	Intron	||	Lims1	||	1	2	2	||	0	0.0267094	-0.0267094	||	0	1	0	|	0	17	0	|	0	10	0	||	0	2	0	|	1	24	0.0416667	|	1	26	0.0384615	||	Unmodulated	0.184156
chr7:55977224	chr7	55977224	-	Intron	||	A230056P14Rik	||	0	2	2	||	0.160256	0	0.160256	||	0	11	0	|	3	13	0.230769	|	1	4	0.25	||	0	10	0	|	0	0	NA	|	0	7	0	||	Unmodulated	0.184156
chr18:56956986	chr18	56956986	-	UTR	||	C330018D20Rik	||	11	3	3	||	0.0580808	0	0.0580808	||	1	12	0.0833333	|	2	22	0.0909091	|	0	18	0	||	0	11	0	|	0	12	0	|	0	17	0	||	Unmodulated	0.184274
chr4:134875372	chr4	134875372	-	Intron	||	Rhd	||	0	2	2	||	0.0580808	0	0.0580808	||	0	1	0	|	1	12	0.0833333	|	1	11	0.0909091	||	0	0	NA	|	0	5	0	|	0	10	0	||	Unmodulated	0.184274
chr6:113712629	chr6	113712629	+	intergenic	||	NA	||	6	3	3	||	0.116162	0	0.116162	||	0	6	0	|	3	18	0.166667	|	2	11	0.181818	||	0	17	0	|	0	26	0	|	0	10	0	||	Unmodulated	0.184274
chr5:125457225	chr5	125457225	+	UTR	||	Bri3bp	||	4	2	3	||	0.174242	0	0.174242	||	0	5	0	|	1	4	0.25	|	3	11	0.272727	||	0	16	0	|	0	6	0	|	0	7	0	||	Unmodulated	0.184274
chr15:58114998	chr15	58114998	-	Intron	||	Atad2	||	39	3	3	||	0.017019	0	0.017019	||	1	41	0.0243902	|	2	75	0.0266667	|	0	51	0	||	0	39	0	|	0	61	0	|	0	111	0	||	Unmodulated	0.184314
chr18:6060157	chr18	6060157	-	Intron	||	Arhgap12	||	7	3	3	||	0.116918	0.0392157	0.0777027	||	2	17	0.117647	|	4	37	0.108108	|	3	24	0.125	||	2	17	0.117647	|	0	9	0	|	0	7	0	||	Unmodulated	0.184329
chr12:111799170	chr12	111799170	+	Intron	||	Klc1	||	10	3	3	||	0.0607315	0	0.0607315	||	0	13	0	|	2	21	0.0952381	|	2	23	0.0869565	||	0	10	0	|	0	22	0	|	0	19	0	||	Unmodulated	0.184346
chr8:84956731	chr8	84956731	-	UTR	||	Rnaseh2a	||	14	3	3	||	0.0910973	0	0.0910973	||	2	14	0.142857	|	0	15	0	|	3	23	0.130435	||	0	37	0	|	0	28	0	|	0	27	0	||	Unmodulated	0.184346
chr6:66540207	chr6	66540207	+	UTR	||	Mad2l1	||	19	3	3	||	0.0361808	0	0.0361808	||	3	58	0.0517241	|	5	88	0.0568182	|	0	46	0	||	0	46	0	|	0	19	0	|	0	61	0	||	Unmodulated	0.184401
chr1:37442401	chr1	37442401	-	UTR	||	Mgat4a	||	10	3	3	||	0.0636364	0	0.0636364	||	1	10	0.1	|	0	17	0	|	2	22	0.0909091	||	0	12	0	|	0	15	0	|	0	21	0	||	Unmodulated	0.184428
chr19:25197802	chr19	25197802	+	Intron	||	Dock8	||	1	3	2	||	0.0636364	0	0.0636364	||	0	6	0	|	2	20	0.1	|	1	11	0.0909091	||	0	1	0	|	0	6	0	|	0	7	0	||	Unmodulated	0.184428
chr10:94802413	chr10	94802413	-	Intron	||	Plxnc1	||	5	3	3	||	0.127273	0	0.127273	||	1	5	0.2	|	0	9	0	|	2	11	0.181818	||	0	5	0	|	0	14	0	|	0	7	0	||	Unmodulated	0.184428
chrX:13082911	chrX	13082911	+	Intron	||	Usp9x	||	5	3	3	||	0	0.100251	-0.100251	||	0	5	0	|	0	25	0	|	0	29	0	||	1	7	0.142857	|	3	19	0.157895	|	0	31	0	||	Unmodulated	0.184522
chr6:49259125	chr6	49259125	-	Intron	||	Tra2a	||	15	3	3	||	0.0175926	0	0.0175926	||	0	15	0	|	2	72	0.0277778	|	1	40	0.025	||	0	17	0	|	0	26	0	|	0	24	0	||	Unmodulated	0.184632
chr18:32102931	chr18	32102931	+	UTR	||	Iws1	||	15	3	3	||	0.0844444	0	0.0844444	||	0	15	0	|	4	30	0.133333	|	3	25	0.12	||	0	23	0	|	0	21	0	|	0	20	0	||	Unmodulated	0.184632
chr11:77520357	chr11	77520357	+	Intron	||	Abhd15	||	3	3	2	||	0.140741	0	0.140741	||	1	5	0.2	|	0	6	0	|	4	18	0.222222	||	0	18	0	|	0	13	0	|	0	3	0	||	Unmodulated	0.184632
chr3:22197429	chr3	22197429	+	Intron	||	Tbl1xr1	||	9	3	3	||	0.015873	0.140629	-0.124756	||	0	11	0	|	1	21	0.047619	|	0	9	0	||	5	19	0.263158	|	1	21	0.047619	|	1	9	0.111111	||	Unmodulated	0.184723
chr17:10238439	chr17	10238439	-	Intron	||	Qk	||	12	3	3	||	0.0504762	0	0.0504762	||	1	14	0.0714286	|	0	20	0	|	2	25	0.08	||	0	12	0	|	0	18	0	|	0	41	0	||	Unmodulated	0.184808
chr11:82963209	chr11	82963209	+	intergenic	||	Slfn5	||	7	3	3	||	0.0663377	0	0.0663377	||	0	7	0	|	3	32	0.09375	|	2	19	0.105263	||	0	16	0	|	0	30	0	|	0	13	0	||	Unmodulated	0.184866
chr4:129198637	chr4	129198637	+	Intron	||	Yars	||	2	2	3	||	0	0.157407	-0.157407	||	0	2	0	|	0	15	0	|	0	7	0	||	2	9	0.222222	|	2	8	0.25	|	0	5	0	||	Unmodulated	0.184912
chr7:127983719	chr7	127983719	+	UTR	||	Fus;Gm26690	||	6	3	3	||	0.104938	0	0.104938	||	1	6	0.166667	|	4	27	0.148148	|	0	6	0	||	0	13	0	|	0	29	0	|	0	39	0	||	Unmodulated	0.184912
chr8:110974585	chr8	110974585	+	intergenic	||	NA	||	6	3	3	||	0.118056	0	0.118056	||	1	6	0.166667	|	0	11	0	|	3	16	0.1875	||	0	12	0	|	0	38	0	|	0	18	0	||	Unmodulated	0.184912
chr16:20544771	chr16	20544771	+	UTR	||	Ap2m1	||	4	2	3	||	0.236111	0	0.236111	||	0	4	0	|	3	8	0.375	|	3	9	0.333333	||	0	5	0	|	0	7	0	|	0	7	0	||	Unmodulated	0.184912
chr9:71908960	chr9	71908960	+	Exon	||	Gm18821;Tcf12	||	0	2	2	||	0.0546265	0	0.0546265	||	0	4	0	|	2	23	0.0869565	|	1	13	0.0769231	||	0	0	NA	|	0	14	0	|	0	13	0	||	Unmodulated	0.185029
chr19:27995151	chr19	27995151	-	Intron	||	Gm20407;Rfx3	||	7	3	3	||	0.0892857	0	0.0892857	||	1	7	0.142857	|	0	21	0	|	2	16	0.125	||	0	8	0	|	0	7	0	|	0	10	0	||	Unmodulated	0.185312
chr7:127566829	chr7	127566829	+	UTR	||	Gm28198;Gm42715;Tmem265	||	10	3	3	||	0.107143	0	0.107143	||	3	20	0.15	|	6	35	0.171429	|	0	32	0	||	0	10	0	|	0	27	0	|	0	42	0	||	Unmodulated	0.185312
chr5:113087815	chr5	113087815	-	UTR	||	2900026A02Rik	||	2	2	2	||	0.178571	0	0.178571	||	0	3	0	|	4	16	0.25	|	6	21	0.285714	||	0	5	0	|	0	7	0	|	0	2	0	||	Unmodulated	0.185312
chrX:150985741	chrX	150985741	-	UTR	||	Gnl3l	||	32	3	3	||	0.0490336	0.004329	0.0447046	||	3	32	0.09375	|	1	53	0.0188679	|	2	58	0.0344828	||	0	43	0	|	0	80	0	|	1	77	0.012987	||	Unmodulated	0.185398
chr5:135407810	chr5	135407810	-	UTR	||	Hip1	||	12	3	3	||	0.0623188	0	0.0623188	||	2	23	0.0869565	|	2	20	0.1	|	0	20	0	||	0	12	0	|	0	46	0	|	0	20	0	||	Unmodulated	0.185483
chr2:126891471	chr2	126891471	-	UTR	||	Sppl2a	||	4	3	2	||	0.218116	0	0.218116	||	0	10	0	|	14	40	0.35	|	7	23	0.304348	||	0	6	0	|	0	4	0	|	0	13	0	||	Unmodulated	0.185483
chr12:71098211	chr12	71098211	+	UTR	||	Arid4a	||	25	3	3	||	0.140087	0	0.140087	||	7	25	0.28	|	5	58	0.0862069	|	2	37	0.0540541	||	0	45	0	|	0	41	0	|	0	32	0	||	Unmodulated	0.185548
chr19:59309491	chr19	59309491	-	Intron	||	Pdzd8	||	19	3	3	||	0.0996337	0	0.0996337	||	4	20	0.2	|	2	39	0.0512821	|	2	42	0.047619	||	0	19	0	|	0	22	0	|	0	28	0	||	Unmodulated	0.185565
chr17:21989057	chr17	21989057	+	Intron	||	Zfp943	||	7	3	3	||	0	0.0478632	-0.0478632	||	0	7	0	|	0	25	0	|	0	9	0	||	0	7	0	|	1	15	0.0666667	|	1	13	0.0769231	||	Unmodulated	0.185578
chr8:88171868	chr8	88171868	+	UTR	||	Heatr3	||	10	3	3	||	0.14359	0	0.14359	||	2	10	0.2	|	3	13	0.230769	|	0	10	0	||	0	37	0	|	0	26	0	|	0	18	0	||	Unmodulated	0.185578
chr5:3785504	chr5	3785504	-	Intron	||	Ankib1	||	6	3	3	||	0.0400239	0	0.0400239	||	0	6	0	|	2	31	0.0645161	|	1	18	0.0555556	||	0	10	0	|	0	18	0	|	0	16	0	||	Unmodulated	0.185768
chr12:40209746	chr12	40209746	-	Intron	||	Gm17024;Ifrd1	||	5	3	3	||	0	0.206349	-0.206349	||	0	5	0	|	0	5	0	|	0	6	0	||	2	7	0.285714	|	2	6	0.333333	|	0	5	0	||	Unmodulated	0.185908
chr9:59558634	chr9	59558634	+	Intron	||	Hexa	||	3	2	2	||	0	0.206349	-0.206349	||	0	3	0	|	0	10	0	|	0	11	0	||	1	3	0.333333	|	0	14	0	|	2	7	0.285714	||	Unmodulated	0.185908
chr8:25762365	chr8	25762365	-	Intron	||	Gm17484	||	0	2	2	||	0.103175	0	0.103175	||	1	7	0.142857	|	1	6	0.166667	|	0	1	0	||	0	0	NA	|	0	5	0	|	0	5	0	||	Unmodulated	0.185908
chr11:82962584	chr11	82962584	+	UTR	||	Slfn5	||	8	3	3	||	0.103175	0	0.103175	||	0	9	0	|	3	21	0.142857	|	3	18	0.166667	||	0	8	0	|	0	21	0	|	0	18	0	||	Unmodulated	0.185908
chr6:114859476	chr6	114859476	+	UTR	||	Atg7	||	6	3	3	||	0.103175	0	0.103175	||	1	6	0.166667	|	0	15	0	|	2	14	0.142857	||	0	11	0	|	0	6	0	|	0	18	0	||	Unmodulated	0.185908
chrX:144333655	chrX	144333655	+	Intron	||	Alg13	||	1	2	2	||	0.103175	0	0.103175	||	1	7	0.142857	|	1	6	0.166667	|	0	4	0	||	0	1	0	|	0	5	0	|	0	5	0	||	Unmodulated	0.185908
chr17:83470239	chr17	83470239	+	Intron	||	Eml4	||	4	2	3	||	0.298942	0.0833333	0.215608	||	1	9	0.111111	|	2	7	0.285714	|	2	4	0.5	||	1	6	0.166667	|	1	12	0.0833333	|	0	10	0	||	Unmodulated	0.18594
chrX:13078291	chrX	13078291	+	Intron	||	Usp9x	||	3	3	2	||	0.072549	0	0.072549	||	0	5	0	|	2	20	0.1	|	2	17	0.117647	||	0	3	0	|	0	27	0	|	0	27	0	||	Unmodulated	0.186174
chr3:51458219	chr3	51458219	+	Intron	||	Naa15	||	12	3	3	||	0.280303	0.0509259	0.229377	||	6	12	0.5	|	3	33	0.0909091	|	6	24	0.25	||	3	24	0.125	|	0	59	0	|	1	36	0.0277778	||	Unmodulated	0.1862
chr11:74716252	chr11	74716252	-	Intron	||	Pafah1b1	||	12	3	3	||	0.0440115	0	0.0440115	||	1	14	0.0714286	|	0	43	0	|	2	33	0.0606061	||	0	12	0	|	0	34	0	|	0	37	0	||	Unmodulated	0.186233
chr7:132936837	chr7	132936837	+	Intron	||	Fgfr2;Zranb1	||	4	3	2	||	0	0.0559441	-0.0559441	||	0	13	0	|	0	35	0	|	0	23	0	||	0	4	0	|	2	22	0.0909091	|	2	26	0.0769231	||	Unmodulated	0.186324
chr11:97462399	chr11	97462399	+	Intron	||	Arhgap23	||	5	3	3	||	0.0559441	0	0.0559441	||	0	5	0	|	1	11	0.0909091	|	1	13	0.0769231	||	0	14	0	|	0	7	0	|	0	18	0	||	Unmodulated	0.186324
chr15:81456155	chr15	81456155	+	UTR	||	Xpnpep3	||	9	3	3	||	0.0559441	0	0.0559441	||	0	9	0	|	1	13	0.0769231	|	1	11	0.0909091	||	0	23	0	|	0	18	0	|	0	18	0	||	Unmodulated	0.186324
chr1:134465320	chr1	134465320	+	Exon	||	Klhl12	||	6	3	3	||	0.0559441	0	0.0559441	||	0	6	0	|	2	26	0.0769231	|	2	22	0.0909091	||	0	12	0	|	0	31	0	|	0	43	0	||	Unmodulated	0.186324
chr5:113940466	chr5	113940466	-	UTR	||	Ssh1	||	15	3	3	||	0.0455247	0	0.0455247	||	1	16	0.0625	|	2	27	0.0740741	|	0	23	0	||	0	16	0	|	0	15	0	|	0	32	0	||	Unmodulated	0.18642
chr19:38940805	chr19	38940805	+	Intron	||	Hells	||	3	2	2	||	0.204444	0	0.204444	||	1	3	0.333333	|	7	25	0.28	|	0	22	0	||	0	4	0	|	0	31	0	|	0	31	0	||	Unmodulated	0.186573
chr4:155621108	chr4	155621108	+	UTR	||	Gm10563;Gm16023;Slc35e2	||	25	3	3	||	0.0292063	0	0.0292063	||	0	33	0	|	2	42	0.047619	|	2	50	0.04	||	0	25	0	|	0	43	0	|	0	64	0	||	Unmodulated	0.186573
chr7:123129300	chr7	123129300	+	Intron	||	Gm45846;Tnrc6a	||	12	3	3	||	0.0120004	0	0.0120004	||	0	12	0	|	1	51	0.0196078	|	1	61	0.0163934	||	0	16	0	|	0	29	0	|	0	49	0	||	Unmodulated	0.186739
chr2:5021195	chr2	5021195	-	UTR	||	Optn	||	55	3	3	||	0.0452257	0	0.0452257	||	1	76	0.0131579	|	6	67	0.0895522	|	3	91	0.032967	||	0	55	0	|	0	76	0	|	0	153	0	||	Unmodulated	0.186828
chr13:77093202	chr13	77093202	-	Intron	||	Slf1	||	3	2	3	||	0	0.0203704	-0.0203704	||	0	3	0	|	0	16	0	|	0	14	0	||	0	7	0	|	1	36	0.0277778	|	1	30	0.0333333	||	Unmodulated	0.186857
chr2:69202224	chr2	69202224	-	Intron	||	Spc25	||	9	3	3	||	0.0814815	0	0.0814815	||	1	9	0.111111	|	2	15	0.133333	|	0	13	0	||	0	10	0	|	0	21	0	|	0	45	0	||	Unmodulated	0.186857
chr11:105179146	chr11	105179146	-	UTR	||	1700052K11Rik;Tlk2	||	1	2	2	||	0.122222	0	0.122222	||	0	1	0	|	2	12	0.166667	|	1	5	0.2	||	0	2	0	|	0	8	0	|	0	11	0	||	Unmodulated	0.186857
chr2:127113152	chr2	127113152	-	Intron	||	Ncaph	||	5	3	3	||	0.122222	0	0.122222	||	2	10	0.2	|	0	11	0	|	2	12	0.166667	||	0	5	0	|	0	31	0	|	0	41	0	||	Unmodulated	0.186857
chr2:121543274	chr2	121543274	+	UTR	||	Wdr76	||	58	3	3	||	0.1808	0	0.1808	||	21	58	0.362069	|	12	107	0.11215	|	6	88	0.0681818	||	0	71	0	|	0	81	0	|	0	137	0	||	Unmodulated	0.186872
chr15:58115094	chr15	58115094	-	Intron	||	Atad2	||	34	3	3	||	0.14001	0	0.14001	||	10	36	0.277778	|	3	71	0.0422535	|	4	40	0.1	||	0	34	0	|	0	59	0	|	0	83	0	||	Unmodulated	0.186873
chr4:21834574	chr4	21834574	+	UTR	||	Usp45	||	15	3	3	||	0.0507663	0	0.0507663	||	0	18	0	|	2	29	0.0689655	|	2	24	0.0833333	||	0	25	0	|	0	15	0	|	0	31	0	||	Unmodulated	0.187113
chrX:150985656	chrX	150985656	-	UTR	||	Gnl3l	||	53	3	3	||	0.0652502	0	0.0652502	||	6	56	0.107143	|	7	79	0.0886076	|	0	83	0	||	0	53	0	|	0	103	0	|	0	90	0	||	Unmodulated	0.187139
chr9:58609634	chr9	58609634	+	Intron	||	Nptn	||	11	3	3	||	0.059834	0.00641026	0.0534237	||	2	18	0.111111	|	1	60	0.0166667	|	3	58	0.0517241	||	0	11	0	|	0	38	0	|	1	52	0.0192308	||	Unmodulated	0.187149
chr15:79540865	chr15	79540865	-	Intron	||	Ddx17	||	14	3	3	||	0.052795	0	0.052795	||	1	14	0.0714286	|	2	23	0.0869565	|	0	18	0	||	0	22	0	|	0	18	0	|	0	14	0	||	Unmodulated	0.187399
chr9:71908962	chr9	71908962	+	Exon	||	Gm18821;Tcf12	||	0	2	2	||	0.052795	0	0.052795	||	0	4	0	|	2	23	0.0869565	|	1	14	0.0714286	||	0	0	NA	|	0	14	0	|	0	11	0	||	Unmodulated	0.187399
chr19:3518721	chr19	3518721	-	Intron	||	Ppp6r3	||	10	3	3	||	0.118743	0.00757576	0.111167	||	6	26	0.230769	|	2	43	0.0465116	|	3	38	0.0789474	||	0	10	0	|	0	19	0	|	1	44	0.0227273	||	Unmodulated	0.187484
chr6:113712595	chr6	113712595	+	intergenic	||	NA	||	6	3	3	||	0.13468	0	0.13468	||	0	6	0	|	4	18	0.222222	|	2	11	0.181818	||	0	17	0	|	0	21	0	|	0	9	0	||	Unmodulated	0.187556
chr6:113712591	chr6	113712591	+	intergenic	||	NA	||	5	3	3	||	0.0673401	0	0.0673401	||	0	5	0	|	2	18	0.111111	|	1	11	0.0909091	||	0	17	0	|	0	19	0	|	0	11	0	||	Unmodulated	0.187556
chr11:86606240	chr11	86606240	-	Intron	||	Vmp1	||	3	3	2	||	0.10101	0	0.10101	||	1	6	0.166667	|	3	22	0.136364	|	0	5	0	||	0	6	0	|	0	7	0	|	0	3	0	||	Unmodulated	0.187556
chr3:68994284	chr3	68994284	-	Exon	||	Ift80	||	11	3	3	||	0.0464744	0	0.0464744	||	1	13	0.0769231	|	0	21	0	|	1	16	0.0625	||	0	11	0	|	0	22	0	|	0	19	0	||	Unmodulated	0.187838
chr1:183324374	chr1	183324374	+	UTR	||	Aida	||	7	3	3	||	0.0929487	0	0.0929487	||	0	7	0	|	2	16	0.125	|	2	13	0.153846	||	0	22	0	|	0	18	0	|	0	18	0	||	Unmodulated	0.187838
chr9:65904027	chr9	65904027	+	Intron	||	Trip4	||	2	2	2	||	0.498397	0	0.498397	||	2	2	1	|	3	16	0.1875	|	12	39	0.307692	||	0	4	0	|	0	34	0	|	0	77	0	||	Unmodulated	0.187862
chr4:33466433	chr4	33466433	+	Intron	||	Rngtt	||	1	2	2	||	0.0646998	0	0.0646998	||	0	3	0	|	2	23	0.0869565	|	3	28	0.107143	||	0	1	0	|	0	10	0	|	0	21	0	||	Unmodulated	0.187884
chr5:150640556	chr5	150640556	-	UTR	||	N4bp2l2	||	19	3	3	||	0.0421237	0	0.0421237	||	0	19	0	|	3	53	0.0566038	|	3	43	0.0697674	||	0	26	0	|	0	54	0	|	0	53	0	||	Unmodulated	0.187897
chr18:38305732	chr18	38305732	+	Intron	||	Rnf14	||	4	3	2	||	0.0860806	0	0.0860806	||	1	7	0.142857	|	3	26	0.115385	|	0	13	0	||	0	4	0	|	0	11	0	|	0	12	0	||	Unmodulated	0.188085
chr16:22855743	chr16	22855743	-	Intron	||	Tbccd1	||	14	3	3	||	0.178342	0	0.178342	||	5	14	0.357143	|	2	32	0.0625	|	3	26	0.115385	||	0	17	0	|	0	24	0	|	0	40	0	||	Unmodulated	0.188152
chr9:56491748	chr9	56491748	+	Intron	||	Hmg20a	||	5	3	3	||	0.398068	0.162879	0.235189	||	3	5	0.6	|	6	23	0.26087	|	7	21	0.333333	||	4	11	0.363636	|	0	14	0	|	1	8	0.125	||	Unmodulated	0.188162
chr16:20544762	chr16	20544762	+	UTR	||	Ap2m1	||	4	3	2	||	0.347619	0	0.347619	||	1	5	0.2	|	1	7	0.142857	|	7	10	0.7	||	0	4	0	|	0	7	0	|	0	7	0	||	Unmodulated	0.188438
chr3:84921117	chr3	84921117	+	Intron	||	Fbxw7;Gm37240	||	6	3	3	||	0	0.075	-0.075	||	0	10	0	|	0	14	0	|	0	6	0	||	1	8	0.125	|	2	20	0.1	|	0	14	0	||	Unmodulated	0.188497
chr14:52079766	chr14	52079766	-	Intron	||	Hnrnpc	||	4	2	3	||	0	0.05	-0.05	||	0	4	0	|	0	19	0	|	0	20	0	||	1	12	0.0833333	|	0	26	0	|	2	30	0.0666667	||	Unmodulated	0.188497
chr8:25762312	chr8	25762312	-	Intron	||	Gm17484	||	0	2	2	||	0.075	0	0.075	||	1	8	0.125	|	1	10	0.1	|	0	1	0	||	0	0	NA	|	0	10	0	|	0	5	0	||	Unmodulated	0.188497
chr2:164066035	chr2	164066035	-	Intron	||	Tomm34	||	4	2	3	||	0.15	0	0.15	||	1	4	0.25	|	0	18	0	|	2	10	0.2	||	0	7	0	|	0	16	0	|	0	5	0	||	Unmodulated	0.188497
chr17:13019563	chr17	13019563	+	intergenic	||	NA	||	1	2	3	||	0.428571	0	0.428571	||	4	7	0.571429	|	5	7	0.714286	|	0	1	0	||	0	9	0	|	0	11	0	|	0	6	0	||	Unmodulated	0.188497
chr2:120602211	chr2	120602211	+	intergenic	||	NA	||	20	3	3	||	0.03	0	0.03	||	1	20	0.05	|	0	36	0	|	1	25	0.04	||	0	24	0	|	0	35	0	|	0	36	0	||	Unmodulated	0.188497
chr18:32102590	chr18	32102590	+	UTR	||	Iws1	||	24	3	3	||	0.09375	0	0.09375	||	3	24	0.125	|	10	64	0.15625	|	0	32	0	||	0	26	0	|	0	52	0	|	0	46	0	||	Unmodulated	0.188497
chr11:101197211	chr11	101197211	-	Intron	||	Ezh1	||	0	2	3	||	0	0.1	-0.1	||	0	0	NA	|	0	11	0	|	0	6	0	||	1	6	0.166667	|	0	10	0	|	2	15	0.133333	||	Unmodulated	0.188497
chr9:66017286	chr9	66017286	+	Intron	||	Csnk1g1	||	4	2	3	||	0	0.025987	-0.025987	||	0	4	0	|	0	21	0	|	0	17	0	||	1	23	0.0434783	|	1	29	0.0344828	|	0	9	0	||	Unmodulated	0.188885
chr18:56957001	chr18	56957001	-	UTR	||	C330018D20Rik	||	9	3	3	||	0.125731	0	0.125731	||	2	12	0.166667	|	0	18	0	|	4	19	0.210526	||	0	9	0	|	0	11	0	|	0	16	0	||	Unmodulated	0.188968
chr11:101037505	chr11	101037505	+	Intron	||	Atp6v0a1	||	2	3	2	||	0.398148	0	0.398148	||	2	6	0.333333	|	1	12	0.0833333	|	7	9	0.777778	||	0	2	0	|	0	11	0	|	0	14	0	||	Unmodulated	0.188968
chr13:59787603	chr13	59787603	-	Intron	||	Zcchc6	||	4	3	2	||	0.0397661	0	0.0397661	||	0	10	0	|	1	15	0.0666667	|	1	19	0.0526316	||	0	4	0	|	0	46	0	|	0	42	0	||	Unmodulated	0.189096
chr13:35757599	chr13	35757599	+	Intron	||	Cdyl	||	14	3	3	||	0.1533	0.0254804	0.12782	||	4	14	0.285714	|	3	38	0.0789474	|	4	42	0.0952381	||	1	19	0.0526316	|	1	42	0.0238095	|	0	104	0	||	Unmodulated	0.189128
chr3:106576804	chr3	106576804	+	intergenic	||	NA	||	5	3	3	||	0.0541126	0	0.0541126	||	0	11	0	|	1	11	0.0909091	|	1	14	0.0714286	||	0	7	0	|	0	13	0	|	0	5	0	||	Unmodulated	0.189319
chr5:24119733	chr5	24119733	+	Intron	||	Klhl7	||	5	3	3	||	0.0541126	0	0.0541126	||	1	11	0.0909091	|	0	21	0	|	1	14	0.0714286	||	0	5	0	|	0	23	0	|	0	35	0	||	Unmodulated	0.189319
chr11:23271972	chr11	23271972	+	Intron	||	Xpo1	||	16	3	3	||	0.0953874	0	0.0953874	||	3	16	0.1875	|	4	52	0.0769231	|	1	46	0.0217391	||	0	16	0	|	0	35	0	|	0	37	0	||	Unmodulated	0.189436
chr9:20939595	chr9	20939595	-	Intron	||	Dnmt1	||	5	3	3	||	0.148889	0.0604396	0.0884493	||	1	5	0.2	|	2	25	0.08	|	4	24	0.166667	||	0	7	0	|	2	14	0.142857	|	1	26	0.0384615	||	Unmodulated	0.189534
chr16:18419503	chr16	18419503	-	Intron	||	Comt;Gm15764	||	3	2	2	||	0.0475	0	0.0475	||	0	4	0	|	2	25	0.08	|	2	32	0.0625	||	0	3	0	|	0	14	0	|	0	32	0	||	Unmodulated	0.189592
chr17:28959888	chr17	28959888	+	Intron	||	Kctd20	||	6	3	3	||	0.0475	0	0.0475	||	0	6	0	|	2	32	0.0625	|	2	25	0.08	||	0	17	0	|	0	27	0	|	0	35	0	||	Unmodulated	0.189592
chr6:52604330	chr6	52604330	-	Intron	||	Hibadh	||	7	3	3	||	0	0.169312	-0.169312	||	0	7	0	|	0	30	0	|	0	28	0	||	2	7	0.285714	|	0	24	0	|	2	9	0.222222	||	Unmodulated	0.189809
chr16:32983827	chr16	32983827	+	Intron	||	Lrch3	||	2	2	2	||	0.0846561	0	0.0846561	||	0	2	0	|	1	9	0.111111	|	1	7	0.142857	||	0	2	0	|	0	10	0	|	0	6	0	||	Unmodulated	0.189809
chr18:35674533	chr18	35674533	-	UTR	||	Dnajc18	||	3	2	3	||	0.169312	0	0.169312	||	0	3	0	|	2	9	0.222222	|	2	7	0.285714	||	0	6	0	|	0	15	0	|	0	6	0	||	Unmodulated	0.189809
chr17:13020010	chr17	13020010	+	intergenic	||	NA	||	8	3	3	||	0.169312	0	0.169312	||	2	9	0.222222	|	4	14	0.285714	|	0	8	0	||	0	15	0	|	0	55	0	|	0	25	0	||	Unmodulated	0.189809
chr9:73013560	chr9	73013560	+	UTR	||	Ccpg1;Gm44503;Pigb	||	20	3	3	||	0.177778	0	0.177778	||	6	20	0.3	|	0	25	0	|	7	30	0.233333	||	0	24	0	|	0	23	0	|	0	46	0	||	Unmodulated	0.189809
chr10:80686435	chr10	80686435	-	UTR	||	Gm26541;Mob3a	||	46	3	3	||	0.061217	0	0.061217	||	8	65	0.123077	|	4	103	0.038835	|	1	46	0.0217391	||	0	62	0	|	0	64	0	|	0	52	0	||	Unmodulated	0.18984
chr13:24815590	chr13	24815590	+	intergenic	||	BC005537	||	9	3	3	||	0.165079	0	0.165079	||	3	9	0.333333	|	1	15	0.0666667	|	2	21	0.0952381	||	0	19	0	|	0	28	0	|	0	46	0	||	Unmodulated	0.190067
chr1:136321031	chr1	136321031	-	Intron	||	Camsap2	||	8	3	3	||	0.0619048	0	0.0619048	||	1	8	0.125	|	1	28	0.0357143	|	1	40	0.025	||	0	10	0	|	0	13	0	|	0	35	0	||	Unmodulated	0.190067
chr13:74447393	chr13	74447393	-	intergenic	||	E430024I08Rik	||	17	3	3	||	0	0.0347594	-0.0347594	||	0	23	0	|	0	22	0	|	0	43	0	||	1	17	0.0588235	|	0	36	0	|	1	22	0.0454545	||	Unmodulated	0.190132
chr7:55977257	chr7	55977257	-	Intron	||	A230056P14Rik	||	0	3	2	||	0.382353	0	0.382353	||	11	17	0.647059	|	0	19	0	|	3	6	0.5	||	0	9	0	|	0	0	NA	|	0	10	0	||	Unmodulated	0.190132
chr4:155621026	chr4	155621026	+	UTR	||	Gm10563;Gm16023;Slc35e2	||	13	3	3	||	0.105501	0	0.105501	||	0	13	0	|	5	28	0.178571	|	4	29	0.137931	||	0	17	0	|	0	50	0	|	0	51	0	||	Unmodulated	0.190152
chr13:67621395	chr13	67621395	-	Exon	||	CT573016.1;Zfp729a	||	23	3	3	||	0.0218695	0	0.0218695	||	1	27	0.037037	|	1	35	0.0285714	|	0	39	0	||	0	35	0	|	0	26	0	|	0	23	0	||	Unmodulated	0.190217
chr8:72482342	chr8	72482342	-	UTR	||	Slc35e1	||	40	3	3	||	0.0988607	0	0.0988607	||	12	60	0.2	|	4	93	0.0430108	|	6	112	0.0535714	||	0	40	0	|	0	67	0	|	0	124	0	||	Unmodulated	0.190281
chr4:119819456	chr4	119819456	+	Intron	||	Hivep3	||	3	2	3	||	0	0.117949	-0.117949	||	0	9	0	|	0	11	0	|	0	3	0	||	2	10	0.2	|	0	6	0	|	2	13	0.153846	||	Unmodulated	0.190362
chr2:91213288	chr2	91213288	+	UTR	||	Acp2;Ddb2	||	13	3	3	||	0.117949	0	0.117949	||	2	13	0.153846	|	0	14	0	|	3	15	0.2	||	0	17	0	|	0	33	0	|	0	35	0	||	Unmodulated	0.190362
chrX:134588546	chrX	134588546	-	UTR	||	Gla	||	4	2	3	||	0.0589744	0	0.0589744	||	0	4	0	|	1	13	0.0769231	|	1	10	0.1	||	0	12	0	|	0	12	0	|	0	12	0	||	Unmodulated	0.190362
chr14:31700921	chr14	31700921	-	UTR	||	Ankrd28	||	39	3	3	||	0.0267794	0	0.0267794	||	2	44	0.0454545	|	3	86	0.0348837	|	0	39	0	||	0	63	0	|	0	50	0	|	0	80	0	||	Unmodulated	0.190481
chr2:154537930	chr2	154537930	+	UTR	||	Cbfa2t2	||	9	3	3	||	0.102415	0	0.102415	||	0	9	0	|	2	15	0.133333	|	4	23	0.173913	||	0	10	0	|	0	20	0	|	0	23	0	||	Unmodulated	0.190533
chr18:32102529	chr18	32102529	+	UTR	||	Iws1	||	18	3	3	||	0.0490544	0	0.0490544	||	0	19	0	|	3	47	0.0638298	|	2	24	0.0833333	||	0	18	0	|	0	53	0	|	0	37	0	||	Unmodulated	0.190581
chr11:59458356	chr11	59458356	+	UTR	||	Jmjd4	||	6	3	3	||	0.16453	0	0.16453	||	2	6	0.333333	|	3	36	0.0833333	|	1	13	0.0769231	||	0	9	0	|	0	14	0	|	0	10	0	||	Unmodulated	0.190639
chr2:121544323	chr2	121544323	+	UTR	||	Wdr76	||	15	3	3	||	0.0226244	0	0.0226244	||	0	15	0	|	1	34	0.0294118	|	1	26	0.0384615	||	0	28	0	|	0	42	0	|	0	53	0	||	Unmodulated	0.190666
chr8:107018215	chr8	107018215	+	intergenic	||	Sntb2	||	10	3	3	||	0	0.0452489	-0.0452489	||	0	15	0	|	0	10	0	|	0	20	0	||	0	10	0	|	2	26	0.0769231	|	1	17	0.0588235	||	Unmodulated	0.190666
chr13:21392445	chr13	21392445	-	UTR	||	Zkscan3	||	8	3	3	||	0.118008	0	0.118008	||	3	13	0.230769	|	1	43	0.0232558	|	3	30	0.1	||	0	8	0	|	0	19	0	|	0	26	0	||	Unmodulated	0.190757
chr11:53264358	chr11	53264358	-	Exon	||	Hspa4	||	9	3	3	||	0.298341	0.0986334	0.199707	||	3	9	0.333333	|	15	33	0.454545	|	3	28	0.107143	||	4	17	0.235294	|	2	33	0.0606061	|	0	25	0	||	Unmodulated	0.190827
chr6:38728621	chr6	38728621	-	Intron	||	Hipk2	||	3	2	2	||	0.0367063	0	0.0367063	||	0	3	0	|	1	16	0.0625	|	1	21	0.047619	||	0	3	0	|	0	8	0	|	0	27	0	||	Unmodulated	0.190858
chr2:37415408	chr2	37415408	-	Intron	||	Rc3h2	||	4	2	3	||	0.495791	0	0.495791	||	4	4	1	|	11	36	0.305556	|	6	33	0.181818	||	0	9	0	|	0	17	0	|	0	24	0	||	Unmodulated	0.190888
chr2:121492885	chr2	121492885	-	UTR	||	Mfap1a	||	9	3	3	||	0.0860566	0	0.0860566	||	1	9	0.111111	|	5	34	0.147059	|	0	13	0	||	0	22	0	|	0	46	0	|	0	25	0	||	Unmodulated	0.191305
chr12:8750276	chr12	8750276	+	UTR	||	Pum2	||	48	3	3	||	0.044477	0.00350877	0.0409682	||	1	48	0.0208333	|	6	69	0.0869565	|	2	78	0.025641	||	0	67	0	|	1	95	0.0105263	|	0	87	0	||	Unmodulated	0.191368
chr10:22311760	chr10	22311760	+	Exon	||	C920009B18Rik;Raet1e	||	10	3	3	||	0.0997562	0	0.0997562	||	2	10	0.2	|	1	33	0.030303	|	2	29	0.0689655	||	0	12	0	|	0	11	0	|	0	13	0	||	Unmodulated	0.191531
chr11:82962655	chr11	82962655	+	UTR	||	Slfn5	||	6	3	3	||	0.111111	0	0.111111	||	0	6	0	|	4	21	0.190476	|	2	14	0.142857	||	0	8	0	|	0	16	0	|	0	20	0	||	Unmodulated	0.19171
chr2:90559716	chr2	90559716	-	Intron	||	Ptprj	||	4	3	2	||	0.194444	0	0.194444	||	2	8	0.25	|	0	10	0	|	4	12	0.333333	||	0	5	0	|	0	4	0	|	0	7	0	||	Unmodulated	0.19171
chr11:75029793	chr11	75029793	+	Intron	||	Smg6	||	3	2	2	||	0.194444	0	0.194444	||	1	3	0.333333	|	2	8	0.25	|	0	5	0	||	0	4	0	|	0	7	0	|	0	6	0	||	Unmodulated	0.19171
chr12:35070161	chr12	35070161	+	Intron	||	Snx13	||	3	2	3	||	0	0.0972222	-0.0972222	||	0	3	0	|	0	18	0	|	0	9	0	||	0	11	0	|	2	16	0.125	|	4	24	0.166667	||	Unmodulated	0.19171
chr7:127527244	chr7	127527244	+	Intron	||	Gm42715;Srcap	||	3	2	3	||	0.0972222	0	0.0972222	||	0	3	0	|	3	18	0.166667	|	2	16	0.125	||	0	5	0	|	0	11	0	|	0	9	0	||	Unmodulated	0.19171
chr5:123248666	chr5	123248666	+	UTR	||	Psmd9	||	91	3	3	||	0.0257383	0	0.0257383	||	0	110	0	|	5	113	0.0442478	|	3	91	0.032967	||	0	163	0	|	0	98	0	|	0	91	0	||	Unmodulated	0.19208
chr3:116629378	chr3	116629378	+	UTR	||	Gm42893;Sass6	||	4	3	2	||	0.067033	0	0.067033	||	0	24	0	|	3	26	0.115385	|	3	35	0.0857143	||	0	4	0	|	0	15	0	|	0	20	0	||	Unmodulated	0.192248
chr11:78010186	chr11	78010186	+	Intron	||	Phf12	||	12	3	3	||	0.16353	0.037037	0.126493	||	3	12	0.25	|	1	31	0.0322581	|	5	24	0.208333	||	2	18	0.111111	|	0	36	0	|	0	29	0	||	Unmodulated	0.19235
chr8:60973481	chr8	60973481	-	Intron	||	Clcn3	||	4	2	3	||	0.107183	0	0.107183	||	0	4	0	|	5	27	0.185185	|	3	22	0.136364	||	0	11	0	|	0	28	0	|	0	43	0	||	Unmodulated	0.192755
chr1:84775563	chr1	84775563	-	Intron	||	Trip12	||	4	3	2	||	0.152778	0.037037	0.115741	||	2	8	0.25	|	1	24	0.0416667	|	3	18	0.166667	||	1	9	0.111111	|	0	15	0	|	0	4	0	||	Unmodulated	0.192795
chr1:10031605	chr1	10031605	-	Exon	||	Cops5	||	11	3	3	||	0.0525253	0	0.0525253	||	1	11	0.0909091	|	2	30	0.0666667	|	0	29	0	||	0	18	0	|	0	15	0	|	0	30	0	||	Unmodulated	0.192998
chr2:120601830	chr2	120601830	+	intergenic	||	NA	||	12	3	3	||	0.0875421	0	0.0875421	||	0	12	0	|	5	33	0.151515	|	2	18	0.111111	||	0	15	0	|	0	41	0	|	0	20	0	||	Unmodulated	0.192998
chr6:113134712	chr6	113134712	+	Intron	||	Setd5	||	7	3	3	||	0	0.0719697	-0.0719697	||	0	7	0	|	0	14	0	|	0	17	0	||	2	16	0.125	|	2	22	0.0909091	|	0	21	0	||	Unmodulated	0.193495
chr11:65775204	chr11	65775204	-	Intron	||	Map2k4	||	5	3	3	||	0.0719697	0	0.0719697	||	1	8	0.125	|	0	27	0	|	1	11	0.0909091	||	0	5	0	|	0	12	0	|	0	15	0	||	Unmodulated	0.193495
chr1:156007981	chr1	156007981	-	Intron	||	Tor1aip1	||	8	3	3	||	0	0.132479	-0.132479	||	0	8	0	|	0	28	0	|	0	38	0	||	2	12	0.166667	|	3	13	0.230769	|	0	18	0	||	Unmodulated	0.193921
chr17:74621786	chr17	74621786	+	Intron	||	Birc6	||	18	3	3	||	0.0441595	0	0.0441595	||	2	26	0.0769231	|	0	35	0	|	1	18	0.0555556	||	0	35	0	|	0	27	0	|	0	44	0	||	Unmodulated	0.193921
chr8:20266988	chr8	20266988	-	Intron	||	6820431F20Rik	||	9	3	3	||	0	0.0883191	-0.0883191	||	0	11	0	|	0	10	0	|	0	10	0	||	1	9	0.111111	|	0	10	0	|	2	13	0.153846	||	Unmodulated	0.193921
chr12:111645868	chr12	111645868	+	Intron	||	Mark3	||	8	3	3	||	0.0883191	0	0.0883191	||	1	9	0.111111	|	0	29	0	|	4	26	0.153846	||	0	8	0	|	0	15	0	|	0	41	0	||	Unmodulated	0.193921
chr7:12973616	chr7	12973616	+	UTR	||	Zfp324	||	4	2	3	||	0.249495	0	0.249495	||	2	4	0.5	|	1	15	0.0666667	|	2	11	0.181818	||	0	9	0	|	0	5	0	|	0	5	0	||	Unmodulated	0.194062
chr3:89379236	chr3	89379236	-	UTR	||	Zbtb7b	||	6	3	3	||	0.0955556	0	0.0955556	||	1	6	0.166667	|	3	25	0.12	|	0	14	0	||	0	10	0	|	0	17	0	|	0	26	0	||	Unmodulated	0.194112
chr11:87343592	chr11	87343592	-	Intron	||	Ppm1e	||	3	3	2	||	0.148748	0.047619	0.101129	||	2	9	0.222222	|	4	57	0.0701754	|	2	13	0.153846	||	1	7	0.142857	|	0	3	0	|	0	18	0	||	Unmodulated	0.194142
chr7:55977274	chr7	55977274	-	Intron	||	A230056P14Rik	||	1	3	2	||	0.25998	0	0.25998	||	10	19	0.526316	|	2	23	0.0869565	|	1	6	0.166667	||	0	12	0	|	0	1	0	|	0	11	0	||	Unmodulated	0.194286
chr19:5573458	chr19	5573458	+	intergenic	||	NA	||	6	3	3	||	0.134242	0	0.134242	||	3	11	0.272727	|	2	25	0.08	|	1	20	0.05	||	0	6	0	|	0	11	0	|	0	17	0	||	Unmodulated	0.194288
chr13:36035754	chr13	36035754	-	Intron	||	AC124562.2;Lyrm4	||	5	3	3	||	0.147386	0	0.147386	||	3	10	0.3	|	1	17	0.0588235	|	1	12	0.0833333	||	0	5	0	|	0	8	0	|	0	6	0	||	Unmodulated	0.194364
chr2:128969608	chr2	128969608	+	Intron	||	Zc3h6	||	7	3	3	||	0	0.0301225	-0.0301225	||	0	7	0	|	0	7	0	|	0	10	0	||	1	19	0.0526316	|	2	53	0.0377358	|	0	19	0	||	Unmodulated	0.194375
chr6:66540645	chr6	66540645	+	UTR	||	Mad2l1	||	108	3	3	||	0.041709	0	0.041709	||	14	169	0.0828402	|	5	151	0.0331126	|	1	109	0.00917431	||	0	199	0	|	0	108	0	|	0	173	0	||	Unmodulated	0.194476
chr8:72480143	chr8	72480143	-	intergenic	||	NA	||	4	3	2	||	0.228571	0	0.228571	||	2	5	0.4	|	0	21	0	|	4	14	0.285714	||	0	4	0	|	0	8	0	|	0	19	0	||	Unmodulated	0.194613
chr9:96056134	chr9	96056134	+	UTR	||	Xrn1	||	3	2	2	||	0.228571	0	0.228571	||	0	3	0	|	4	10	0.4	|	2	7	0.285714	||	0	4	0	|	0	13	0	|	0	9	0	||	Unmodulated	0.194613
chr13:109842374	chr13	109842374	+	Intron	||	Pde4d	||	6	3	3	||	0.164052	0	0.164052	||	2	6	0.333333	|	1	17	0.0588235	|	2	20	0.1	||	0	13	0	|	0	18	0	|	0	25	0	||	Unmodulated	0.19493
chr1:86348703	chr1	86348703	-	UTR	||	Ncl	||	21	3	3	||	0.0349009	0	0.0349009	||	0	21	0	|	3	49	0.0612245	|	2	46	0.0434783	||	0	33	0	|	0	64	0	|	0	50	0	||	Unmodulated	0.194985
chr7:127566662	chr7	127566662	+	UTR	||	Gm28198;Gm42715;Tmem265	||	12	3	3	||	0.0669935	0	0.0669935	||	1	12	0.0833333	|	2	17	0.117647	|	0	13	0	||	0	13	0	|	0	15	0	|	0	15	0	||	Unmodulated	0.19515
chrX:151825624	chrX	151825624	+	Intron	||	Huwe1	||	5	3	3	||	0.123312	0.037037	0.0862745	||	1	5	0.2	|	1	17	0.0588235	|	1	9	0.111111	||	1	9	0.111111	|	0	13	0	|	0	12	0	||	Unmodulated	0.195227
chr9:97087340	chr9	97087340	-	Exon	||	Gm16185;Slc25a36	||	24	3	3	||	0	0.058873	-0.058873	||	0	24	0	|	0	27	0	|	0	29	0	||	0	28	0	|	3	41	0.0731707	|	3	29	0.103448	||	Unmodulated	0.195243
chr7:102471816	chr7	102471816	+	intergenic	||	NA	||	4	2	3	||	0.142157	0	0.142157	||	1	4	0.25	|	3	17	0.176471	|	0	7	0	||	0	8	0	|	0	18	0	|	0	19	0	||	Unmodulated	0.195375
chr4:116539390	chr4	116539390	+	intergenic	||	NA	||	6	3	3	||	0.0947712	0	0.0947712	||	1	6	0.166667	|	2	17	0.117647	|	0	17	0	||	0	6	0	|	0	24	0	|	0	14	0	||	Unmodulated	0.195375
chr7:27821588	chr7	27821588	+	intergenic	||	Zfp626	||	25	3	3	||	0.0732186	0	0.0732186	||	4	27	0.148148	|	2	41	0.0487805	|	1	44	0.0227273	||	0	25	0	|	0	38	0	|	0	39	0	||	Unmodulated	0.195415
chr9:122860211	chr9	122860211	-	Intron	||	Zfp445	||	13	3	3	||	0.043659	0	0.043659	||	0	27	0	|	3	39	0.0769231	|	2	37	0.0540541	||	0	13	0	|	0	74	0	|	0	64	0	||	Unmodulated	0.195672
chr17:66004968	chr17	66004968	-	Intron	||	Ankrd12	||	4	3	2	||	0.0404762	0	0.0404762	||	0	6	0	|	2	28	0.0714286	|	1	20	0.05	||	0	4	0	|	0	8	0	|	0	13	0	||	Unmodulated	0.195928
chr7:38003749	chr7	38003749	-	Intron	||	Uri1	||	4	2	3	||	0.0404762	0	0.0404762	||	0	4	0	|	3	42	0.0714286	|	1	20	0.05	||	0	7	0	|	0	45	0	|	0	21	0	||	Unmodulated	0.195928
chr5:143649638	chr5	143649638	+	Intron	||	Cyth3	||	14	3	3	||	0.0404762	0	0.0404762	||	0	14	0	|	2	28	0.0714286	|	2	40	0.05	||	0	19	0	|	0	25	0	|	0	35	0	||	Unmodulated	0.195928
chr4:44024504	chr4	44024504	+	Intron	||	Clta	||	5	3	3	||	0.0539683	0	0.0539683	||	1	15	0.0666667	|	0	25	0	|	2	21	0.0952381	||	0	5	0	|	0	20	0	|	0	42	0	||	Unmodulated	0.195928
chr2:130554934	chr2	130554934	+	Intron	||	4930473A02Rik	||	2	2	3	||	0	0.0809524	-0.0809524	||	0	2	0	|	0	6	0	|	0	6	0	||	0	6	0	|	1	7	0.142857	|	1	10	0.1	||	Unmodulated	0.195928
chr16:31263320	chr16	31263320	-	Intron	||	Ppp1r2	||	5	3	3	||	0.0353261	0	0.0353261	||	1	16	0.0625	|	1	23	0.0434783	|	0	17	0	||	0	5	0	|	0	14	0	|	0	21	0	||	Unmodulated	0.196346
chr5:136546940	chr5	136546940	-	Intron	||	Cux1	||	2	3	2	||	0.281385	0	0.281385	||	4	7	0.571429	|	2	22	0.0909091	|	4	22	0.181818	||	0	2	0	|	0	10	0	|	0	10	0	||	Unmodulated	0.196428
chr8:3539463	chr8	3539463	+	Intron	||	Pnpla6	||	15	3	3	||	0	0.031339	-0.031339	||	0	15	0	|	0	51	0	|	0	39	0	||	1	26	0.0384615	|	1	18	0.0555556	|	0	34	0	||	Unmodulated	0.196674
chr11:6430816	chr11	6430816	-	Intron	||	H2afv	||	4	2	3	||	0.0626781	0	0.0626781	||	0	4	0	|	2	26	0.0769231	|	2	18	0.111111	||	0	5	0	|	0	18	0	|	0	31	0	||	Unmodulated	0.196674
chr9:44871747	chr9	44871747	-	Intron	||	Kmt2a	||	9	3	3	||	0.0626781	0	0.0626781	||	1	9	0.111111	|	0	36	0	|	2	26	0.0769231	||	0	11	0	|	0	23	0	|	0	30	0	||	Unmodulated	0.196674
chr11:87342191	chr11	87342191	-	Intron	||	Ppm1e	||	2	3	2	||	0.0166667	0.333333	-0.316667	||	0	6	0	|	1	20	0.05	|	0	6	0	||	3	6	0.5	|	1	2	0.5	|	0	11	0	||	Unmodulated	0.196751
chr5:110758719	chr5	110758719	-	Intron	||	Ep400	||	1	2	2	||	0.325397	0	0.325397	||	2	3	0.666667	|	2	14	0.142857	|	1	6	0.166667	||	0	1	0	|	0	6	0	|	0	8	0	||	Unmodulated	0.197004
chr16:32300301	chr16	32300301	+	UTR	||	Rnf168	||	65	3	3	||	0.0668297	0	0.0668297	||	2	68	0.0294118	|	3	88	0.0340909	|	10	73	0.136986	||	0	73	0	|	0	65	0	|	0	98	0	||	Unmodulated	0.197257
chr19:45517894	chr19	45517894	+	Intron	||	Btrc	||	6	3	3	||	0.0431849	0	0.0431849	||	1	19	0.0526316	|	2	26	0.0769231	|	0	17	0	||	0	6	0	|	0	13	0	|	0	26	0	||	Unmodulated	0.197488
chr5:73049915	chr5	73049915	-	Intron	||	Fryl	||	4	3	2	||	0.244589	0	0.244589	||	5	10	0.5	|	2	14	0.142857	|	1	11	0.0909091	||	0	4	0	|	0	8	0	|	0	13	0	||	Unmodulated	0.197491
chr14:21796765	chr14	21796765	+	UTR	||	Samd8	||	4	2	3	||	0.244589	0	0.244589	||	2	4	0.5	|	2	14	0.142857	|	1	11	0.0909091	||	0	7	0	|	0	10	0	|	0	7	0	||	Unmodulated	0.197491
chr2:120601822	chr2	120601822	+	intergenic	||	NA	||	13	3	3	||	0.228009	0	0.228009	||	0	13	0	|	13	32	0.40625	|	5	18	0.277778	||	0	16	0	|	0	37	0	|	0	21	0	||	Unmodulated	0.197534
chr9:45972392	chr9	45972392	-	Intron	||	Pafah1b2	||	12	3	3	||	0	0.0747475	-0.0747475	||	0	12	0	|	0	17	0	|	0	21	0	||	2	15	0.133333	|	3	33	0.0909091	|	0	25	0	||	Unmodulated	0.197735
chr2:31031060	chr2	31031060	-	UTR	||	Fnbp1	||	6	3	3	||	0.191204	0.0430556	0.148148	||	2	6	0.333333	|	8	45	0.177778	|	2	32	0.0625	||	1	16	0.0625	|	1	30	0.0333333	|	1	30	0.0333333	||	Unmodulated	0.198053
chr1:171698176	chr1	171698176	+	Intron	||	Cd48	||	2	3	2	||	0.413271	0	0.413271	||	5	6	0.833333	|	10	33	0.30303	|	3	29	0.103448	||	0	5	0	|	0	8	0	|	0	2	0	||	Unmodulated	0.198187
chr16:20106413	chr16	20106413	+	Intron	||	Klhl24	||	8	3	3	||	0.0266257	0	0.0266257	||	0	11	0	|	1	21	0.047619	|	1	31	0.0322581	||	0	14	0	|	0	16	0	|	0	8	0	||	Unmodulated	0.198195
chr2:121543774	chr2	121543774	+	UTR	||	Wdr76	||	26	3	3	||	0.0317599	0	0.0317599	||	1	26	0.0384615	|	0	86	0	|	5	88	0.0568182	||	0	36	0	|	0	61	0	|	0	79	0	||	Unmodulated	0.198248
chr11:65716150	chr11	65716150	-	Intron	||	Map2k4	||	2	2	2	||	0.492063	0	0.492063	||	2	2	1	|	1	7	0.142857	|	4	12	0.333333	||	0	11	0	|	0	4	0	|	0	10	0	||	Unmodulated	0.198782
chr1:54397361	chr1	54397361	-	UTR	||	Gtf3c3	||	6	3	3	||	0.0814815	0	0.0814815	||	1	6	0.166667	|	1	36	0.0277778	|	1	20	0.05	||	0	6	0	|	0	28	0	|	0	14	0	||	Unmodulated	0.199073
chr4:108571507	chr4	108571507	-	Intron	||	Prpf38a	||	6	3	3	||	0.119048	0	0.119048	||	1	7	0.142857	|	3	14	0.214286	|	0	16	0	||	0	6	0	|	0	19	0	|	0	15	0	||	Unmodulated	0.199359
chr18:25222253	chr18	25222253	+	Intron	||	AW554918	||	4	3	2	||	0	0.138889	-0.138889	||	0	5	0	|	0	9	0	|	0	9	0	||	1	6	0.166667	|	1	4	0.25	|	0	8	0	||	Unmodulated	0.199359
chrX:60294417	chrX	60294417	-	Intron	||	Atp11c	||	9	3	3	||	0.0462963	0	0.0462963	||	1	18	0.0555556	|	2	24	0.0833333	|	0	9	0	||	0	17	0	|	0	14	0	|	0	18	0	||	Unmodulated	0.199359
chr16:52417024	chr16	52417024	-	Intron	||	Alcam	||	3	2	2	||	0.138889	0	0.138889	||	0	3	0	|	1	6	0.166667	|	2	8	0.25	||	0	4	0	|	0	10	0	|	0	8	0	||	Unmodulated	0.199359
chr2:154587081	chr2	154587081	-	UTR	||	Pxmp4	||	4	2	3	||	0.138889	0	0.138889	||	1	6	0.166667	|	0	8	0	|	1	4	0.25	||	0	6	0	|	0	6	0	|	0	11	0	||	Unmodulated	0.199359
chr5:33928877	chr5	33928877	-	Intron	||	Nelfa	||	1	2	2	||	0.277778	0	0.277778	||	2	4	0.5	|	0	12	0	|	2	6	0.333333	||	0	1	0	|	0	19	0	|	0	16	0	||	Unmodulated	0.199359
chr2:69872348	chr2	69872348	+	Intron	||	Mettl5	||	1	2	2	||	0.277778	0	0.277778	||	0	5	0	|	1	3	0.333333	|	4	8	0.5	||	0	1	0	|	0	12	0	|	0	11	0	||	Unmodulated	0.199359
chr15:34926956	chr15	34926956	-	Intron	||	Stk3	||	0	2	2	||	0.0925926	0	0.0925926	||	0	2	0	|	1	9	0.111111	|	2	12	0.166667	||	0	0	NA	|	0	6	0	|	0	6	0	||	Unmodulated	0.199359
chr11:84838264	chr11	84838264	-	Intron	||	Ggnbp2	||	3	3	2	||	0.259259	0	0.259259	||	8	15	0.533333	|	4	30	0.133333	|	3	27	0.111111	||	0	3	0	|	0	18	0	|	0	24	0	||	Unmodulated	0.199359
chr14:52093205	chr14	52093205	-	Intron	||	Hnrnpc	||	18	3	3	||	0.110144	0.0175439	0.0926002	||	4	19	0.210526	|	3	58	0.0517241	|	3	44	0.0681818	||	0	18	0	|	2	38	0.0526316	|	0	39	0	||	Unmodulated	0.200155
chr9:100774257	chr9	100774257	-	Intron	||	Stag1	||	12	3	3	||	0.129713	0	0.129713	||	4	17	0.235294	|	2	13	0.153846	|	0	15	0	||	0	20	0	|	0	12	0	|	0	17	0	||	Unmodulated	0.200821
chr15:98833550	chr15	98833550	-	UTR	||	Kmt2d	||	22	3	3	||	0	0.0402633	-0.0402633	||	0	22	0	|	0	77	0	|	0	44	0	||	3	41	0.0731707	|	0	26	0	|	2	42	0.047619	||	Unmodulated	0.201181
chr2:126818504	chr2	126818504	-	Intron	||	Trpm7	||	6	3	3	||	0.149733	0	0.149733	||	3	11	0.272727	|	6	34	0.176471	|	0	6	0	||	0	11	0	|	0	6	0	|	0	11	0	||	Unmodulated	0.201628
chr18:56956554	chr18	56956554	-	UTR	||	C330018D20Rik	||	1	3	2	||	0.0998217	0	0.0998217	||	2	11	0.181818	|	2	17	0.117647	|	0	22	0	||	0	7	0	|	0	1	0	|	0	13	0	||	Unmodulated	0.201628
chr10:58489654	chr10	58489654	+	Intron	||	Ranbp2	||	10	3	3	||	0.140931	0.00680272	0.134129	||	0	10	0	|	6	32	0.1875	|	4	17	0.235294	||	0	13	0	|	1	49	0.0204082	|	0	27	0	||	Unmodulated	0.201778
chr14:47319972	chr14	47319972	+	UTR	||	Mapk1ip1l	||	13	3	3	||	0.150985	0	0.150985	||	4	13	0.307692	|	1	25	0.04	|	2	19	0.105263	||	0	20	0	|	0	23	0	|	0	29	0	||	Unmodulated	0.201851
chr11:20228606	chr11	20228606	-	UTR	||	Cep68	||	14	3	3	||	0.0608466	0	0.0608466	||	1	14	0.0714286	|	0	26	0	|	2	18	0.111111	||	0	21	0	|	0	32	0	|	0	23	0	||	Unmodulated	0.202139
chr7:128450591	chr7	128450591	-	Intron	||	Tial1	||	8	3	3	||	0.114859	0.040404	0.0744549	||	1	8	0.125	|	3	42	0.0714286	|	4	27	0.148148	||	0	15	0	|	4	33	0.121212	|	0	43	0	||	Unmodulated	0.20227
chr6:47871415	chr6	47871415	+	intergenic	||	Zfp398	||	6	3	3	||	0.138571	0	0.138571	||	2	7	0.285714	|	2	25	0.08	|	1	20	0.05	||	0	6	0	|	0	29	0	|	0	19	0	||	Unmodulated	0.202314
chr1:131921552	chr1	131921552	+	Intron	||	Nucks1	||	0	2	2	||	0.09375	0.0222222	0.0715278	||	0	0	NA	|	1	8	0.125	|	1	16	0.0625	||	0	4	0	|	1	15	0.0666667	|	0	6	0	||	Unmodulated	0.202494
chr14:52187900	chr14	52187900	-	Intron	||	Supt16	||	5	3	3	||	0.0779221	0	0.0779221	||	1	7	0.142857	|	0	17	0	|	1	11	0.0909091	||	0	5	0	|	0	14	0	|	0	20	0	||	Unmodulated	0.202947
chr15:81454964	chr15	81454964	+	UTR	||	Xpnpep3	||	5	3	3	||	0.0779221	0	0.0779221	||	1	11	0.0909091	|	0	13	0	|	2	14	0.142857	||	0	12	0	|	0	5	0	|	0	9	0	||	Unmodulated	0.202947
chr18:35124237	chr18	35124237	+	Intron	||	Ctnna1	||	1	2	2	||	0.0779221	0	0.0779221	||	0	2	0	|	1	7	0.142857	|	1	11	0.0909091	||	0	1	0	|	0	8	0	|	0	7	0	||	Unmodulated	0.202947
chr11:101564941	chr11	101564941	+	Intron	||	Nbr1	||	6	3	3	||	0.705556	0.394048	0.311508	||	4	6	0.666667	|	26	26	1	|	9	20	0.45	||	5	8	0.625	|	4	20	0.2	|	5	14	0.357143	||	Unmodulated	0.202994
chr8:84911209	chr8	84911209	+	UTR	||	Dnase2a	||	21	3	3	||	0.0495338	0	0.0495338	||	0	21	0	|	3	52	0.0576923	|	3	33	0.0909091	||	0	67	0	|	0	41	0	|	0	64	0	||	Unmodulated	0.203168
chr1:66733254	chr1	66733254	-	Intron	||	Kansl1l	||	15	3	3	||	0.0363067	0	0.0363067	||	1	15	0.0666667	|	3	71	0.0422535	|	0	52	0	||	0	19	0	|	0	35	0	|	0	35	0	||	Unmodulated	0.203271
chr4:116552883	chr4	116552883	-	UTR	||	Tmem69	||	10	3	3	||	0.0859649	0	0.0859649	||	3	19	0.157895	|	0	15	0	|	1	10	0.1	||	0	16	0	|	0	15	0	|	0	12	0	||	Unmodulated	0.203331
chr6:113712594	chr6	113712594	+	intergenic	||	NA	||	6	3	3	||	0.0859649	0	0.0859649	||	0	6	0	|	3	19	0.157895	|	1	10	0.1	||	0	18	0	|	0	19	0	|	0	11	0	||	Unmodulated	0.203331
chr17:36005726	chr17	36005726	-	UTR	||	A930015D03Rik;H2-T24	||	115	3	3	||	0.0440659	0.00289855	0.0411673	||	0	157	0	|	14	195	0.0717949	|	9	149	0.0604027	||	1	115	0.00869565	|	0	171	0	|	0	174	0	||	Unmodulated	0.204176
chr1:128163690	chr1	128163690	+	Exon	||	Gm37407;R3hdm1	||	7	3	3	||	0.28254	0.0151515	0.267388	||	4	7	0.571429	|	3	21	0.142857	|	2	15	0.133333	||	1	22	0.0454545	|	0	21	0	|	0	25	0	||	Unmodulated	0.204288
chr16:4626347	chr16	4626347	-	UTR	||	Coro7	||	12	3	3	||	0.123819	0.00666667	0.117152	||	3	12	0.25	|	2	39	0.0512821	|	4	57	0.0701754	||	0	16	0	|	1	50	0.02	|	0	30	0	||	Unmodulated	0.204409
chr9:62885613	chr9	62885613	-	Intron	||	Pias1	||	6	3	3	||	0.0722222	0	0.0722222	||	2	15	0.133333	|	1	12	0.0833333	|	0	6	0	||	0	10	0	|	0	9	0	|	0	12	0	||	Unmodulated	0.204413
chrX:38609692	chrX	38609692	+	Intron	||	Mcts1	||	6	3	3	||	0.0722222	0	0.0722222	||	2	15	0.133333	|	0	25	0	|	2	24	0.0833333	||	0	6	0	|	0	16	0	|	0	21	0	||	Unmodulated	0.204413
chr3:108808166	chr3	108808166	-	Intron	||	Stxbp3	||	2	2	3	||	0	0.108333	-0.108333	||	0	2	0	|	0	15	0	|	0	15	0	||	1	5	0.2	|	1	8	0.125	|	0	8	0	||	Unmodulated	0.204413
chrX:60388886	chrX	60388886	-	Intron	||	Atp11c	||	3	3	2	||	0	0.0541667	-0.0541667	||	0	8	0	|	0	17	0	|	0	8	0	||	0	3	0	|	1	16	0.0625	|	2	20	0.1	||	Unmodulated	0.204413
chr5:150638267	chr5	150638267	-	UTR	||	N4bp2l2	||	10	3	3	||	0.108333	0	0.108333	||	2	10	0.2	|	0	40	0	|	4	32	0.125	||	0	11	0	|	0	63	0	|	0	31	0	||	Unmodulated	0.204413
chr2:112462359	chr2	112462359	+	Intron	||	Emc7	||	2	3	2	||	0.108333	0	0.108333	||	2	10	0.2	|	1	8	0.125	|	0	13	0	||	0	7	0	|	0	5	0	|	0	2	0	||	Unmodulated	0.204413
chr7:30191644	chr7	30191644	-	Intron	||	Capns1	||	5	3	3	||	0.216667	0	0.216667	||	2	5	0.4	|	0	12	0	|	3	12	0.25	||	0	6	0	|	0	18	0	|	0	16	0	||	Unmodulated	0.204413
chr11:82963216	chr11	82963216	+	intergenic	||	Slfn5	||	7	3	3	||	0.0600255	0	0.0600255	||	0	7	0	|	2	29	0.0689655	|	2	18	0.111111	||	0	15	0	|	0	23	0	|	0	9	0	||	Unmodulated	0.204987
chr2:31693479	chr2	31693479	+	Intron	||	Abl1	||	2	2	2	||	0.260462	0.037037	0.223425	||	2	4	0.5	|	4	21	0.190476	|	1	11	0.0909091	||	0	2	0	|	1	9	0.111111	|	0	6	0	||	Unmodulated	0.205054
chr11:35327823	chr11	35327823	+	Intron	||	Slit3	||	0	2	2	||	0.25	0.0208333	0.229167	||	1	6	0.166667	|	2	6	0.333333	|	0	0	NA	||	1	16	0.0625	|	0	6	0	|	0	4	0	||	Unmodulated	0.205083
chr2:120600882	chr2	120600882	+	UTR	||	Snap23	||	13	3	3	||	0.041514	0	0.041514	||	1	13	0.0769231	|	2	42	0.047619	|	0	27	0	||	0	24	0	|	0	45	0	|	0	30	0	||	Unmodulated	0.205208
chr11:96964972	chr11	96964972	+	Exon	||	D030028A08Rik;Sp2	||	13	3	3	||	0.290598	0	0.290598	||	7	13	0.538462	|	0	20	0	|	5	15	0.333333	||	0	13	0	|	0	18	0	|	0	18	0	||	Unmodulated	0.205208
chr2:5019733	chr2	5019733	-	intergenic	||	NA	||	9	3	3	||	0.0513539	0	0.0513539	||	1	17	0.0588235	|	0	17	0	|	2	21	0.0952381	||	0	9	0	|	0	12	0	|	0	26	0	||	Unmodulated	0.205398
chr19:5290866	chr19	5290866	-	Intron	||	Sf3b2	||	6	3	3	||	0.430556	0.0430556	0.3875	||	5	15	0.333333	|	4	32	0.125	|	5	6	0.833333	||	1	15	0.0666667	|	1	16	0.0625	|	0	20	0	||	Unmodulated	0.205473
chr8:78619154	chr8	78619154	+	Intron	||	Slc10a7	||	4	3	2	||	0.193382	0	0.193382	||	2	5	0.4	|	1	16	0.0625	|	2	17	0.117647	||	0	7	0	|	0	10	0	|	0	4	0	||	Unmodulated	0.205532
chr4:8542726	chr4	8542726	+	Intron	||	Rab2a	||	4	2	3	||	0	0.134615	-0.134615	||	0	4	0	|	0	16	0	|	0	11	0	||	3	12	0.25	|	2	13	0.153846	|	0	14	0	||	Unmodulated	0.205707
chr1:86562071	chr1	86562071	-	Intron	||	Pde6d	||	1	3	2	||	0.0673077	0	0.0673077	||	0	5	0	|	2	26	0.0769231	|	2	16	0.125	||	0	1	0	|	0	13	0	|	0	13	0	||	Unmodulated	0.205707
chr5:73049861	chr5	73049861	-	Intron	||	Fryl	||	3	3	2	||	0.150463	0	0.150463	||	5	16	0.3125	|	1	18	0.0555556	|	1	12	0.0833333	||	0	3	0	|	0	12	0	|	0	18	0	||	Unmodulated	0.205839
chr6:29822187	chr6	29822187	+	Intron	||	Ahcyl2	||	3	3	2	||	0.192308	0	0.192308	||	2	5	0.4	|	1	13	0.0769231	|	1	10	0.1	||	0	3	0	|	0	17	0	|	0	12	0	||	Unmodulated	0.205849
chr2:166958896	chr2	166958896	-	Intron	||	Stau1	||	3	2	3	||	0.0488215	0	0.0488215	||	0	3	0	|	2	22	0.0909091	|	1	18	0.0555556	||	0	6	0	|	0	13	0	|	0	19	0	||	Unmodulated	0.206298
chr15:89361814	chr15	89361814	+	Intron	||	Ncaph2	||	11	3	3	||	0.0976431	0	0.0976431	||	2	11	0.181818	|	4	36	0.111111	|	0	22	0	||	0	11	0	|	0	24	0	|	0	27	0	||	Unmodulated	0.206298
chr3:96624315	chr3	96624315	+	UTR	||	6330549D23Rik;Lix1l	||	6	3	3	||	0.0976431	0	0.0976431	||	2	11	0.181818	|	1	9	0.111111	|	0	8	0	||	0	11	0	|	0	9	0	|	0	6	0	||	Unmodulated	0.206298
chr8:111553069	chr8	111553069	+	Intron	||	Znrf1	||	2	3	2	||	0.181085	0	0.181085	||	3	8	0.375	|	2	35	0.0571429	|	1	9	0.111111	||	0	2	0	|	0	8	0	|	0	8	0	||	Unmodulated	0.206491
chr18:6060161	chr18	6060161	-	Intron	||	Arhgap12	||	8	3	3	||	0.0550214	0	0.0550214	||	1	16	0.0625	|	4	39	0.102564	|	0	22	0	||	0	17	0	|	0	9	0	|	0	8	0	||	Unmodulated	0.206541
chr17:36003964	chr17	36003964	-	Intron	||	A930015D03Rik	||	9	3	3	||	0.0910865	0	0.0910865	||	0	9	0	|	9	53	0.169811	|	3	29	0.103448	||	0	11	0	|	0	10	0	|	0	17	0	||	Unmodulated	0.206566
chr2:70734623	chr2	70734623	-	Intron	||	Tlk1	||	7	3	3	||	0.0766046	0	0.0766046	||	1	7	0.142857	|	2	23	0.0869565	|	0	24	0	||	0	8	0	|	0	23	0	|	0	19	0	||	Unmodulated	0.206637
chr5:33418329	chr5	33418329	+	UTR	||	Uvssa	||	16	3	3	||	0	0.0232647	-0.0232647	||	0	19	0	|	0	16	0	|	0	19	0	||	1	23	0.0434783	|	1	38	0.0263158	|	0	45	0	||	Unmodulated	0.207123
chr15:100133382	chr15	100133382	+	Intron	||	Dip2b	||	1	2	2	||	0.0277778	0.366667	-0.338889	||	0	1	0	|	1	12	0.0833333	|	0	17	0	||	3	5	0.6	|	0	8	0	|	2	4	0.5	||	Unmodulated	0.207255
chr17:47552629	chr17	47552629	+	Intron	||	Ccnd3	||	9	3	3	||	0.0107527	0.136574	-0.125821	||	1	31	0.0322581	|	0	118	0	|	0	28	0	||	3	16	0.1875	|	0	32	0	|	2	9	0.222222	||	Unmodulated	0.207586
chr17:30026451	chr17	30026451	+	Intron	||	Zfand3	||	1	3	2	||	0.333333	0.030303	0.30303	||	3	6	0.5	|	6	12	0.5	|	0	11	0	||	0	6	0	|	1	11	0.0909091	|	0	1	0	||	Unmodulated	0.207671
chr12:85607529	chr12	85607529	+	Intron	||	Jdp2	||	4	2	3	||	0.316667	0.568254	-0.251587	||	1	5	0.2	|	1	4	0.25	|	5	10	0.5	||	4	5	0.8	|	2	6	0.333333	|	4	7	0.571429	||	Unmodulated	0.207711
chr5:90312235	chr5	90312235	-	Intron	||	Ankrd17	||	1	2	2	||	0	0.177778	-0.177778	||	0	1	0	|	0	8	0	|	0	10	0	||	1	3	0.333333	|	0	7	0	|	1	5	0.2	||	Unmodulated	0.207882
chr1:164178727	chr1	164178727	+	Intron	||	F5	||	6	3	3	||	0	0.177778	-0.177778	||	0	7	0	|	0	6	0	|	0	9	0	||	2	10	0.2	|	3	9	0.333333	|	0	6	0	||	Unmodulated	0.207882
chr17:25062928	chr17	25062928	-	Intron	||	Ift140;Tmem204	||	3	2	2	||	0.177778	0	0.177778	||	1	3	0.333333	|	2	10	0.2	|	0	11	0	||	0	4	0	|	0	7	0	|	0	6	0	||	Unmodulated	0.207882
chr7:97098935	chr7	97098935	+	Intron	||	Gab2	||	16	3	3	||	0.0222222	0	0.0222222	||	0	16	0	|	1	40	0.025	|	1	24	0.0416667	||	0	37	0	|	0	66	0	|	0	42	0	||	Unmodulated	0.207882
chr1:164178734	chr1	164178734	+	Intron	||	F5	||	6	3	3	||	0	0.0888889	-0.0888889	||	0	7	0	|	0	6	0	|	0	10	0	||	2	12	0.166667	|	1	10	0.1	|	0	7	0	||	Unmodulated	0.207882
chr1:156427547	chr1	156427547	-	UTR	||	Soat1	||	10	3	3	||	0.0888889	0	0.0888889	||	1	10	0.1	|	0	21	0	|	5	30	0.166667	||	0	14	0	|	0	25	0	|	0	37	0	||	Unmodulated	0.207882
chr4:21911309	chr4	21911309	+	UTR	||	Coq3	||	2	3	2	||	0.0888889	0	0.0888889	||	0	9	0	|	1	10	0.1	|	1	6	0.166667	||	0	2	0	|	0	7	0	|	0	8	0	||	Unmodulated	0.207882
chrX:74258991	chrX	74258991	+	Intron	||	Emd	||	1	2	2	||	0.118519	0	0.118519	||	0	2	0	|	4	18	0.222222	|	2	15	0.133333	||	0	1	0	|	0	12	0	|	0	11	0	||	Unmodulated	0.207882
chr2:119650190	chr2	119650190	+	UTR	||	Nusap1	||	12	3	3	||	0.125081	0	0.125081	||	1	27	0.037037	|	3	38	0.0789474	|	7	27	0.259259	||	0	12	0	|	0	16	0	|	0	38	0	||	Unmodulated	0.207965
chr9:30439503	chr9	30439503	+	Intron	||	Snx19	||	0	2	2	||	0.533333	0.0625	0.470833	||	1	1	1	|	4	8	0.5	|	1	10	0.1	||	0	0	NA	|	1	8	0.125	|	0	6	0	||	Unmodulated	0.207995
chr19:8976876	chr19	8976876	+	Intron	||	Eef1g	||	10	3	3	||	0.0371447	0	0.0371447	||	1	24	0.0416667	|	0	61	0	|	3	43	0.0697674	||	0	10	0	|	0	22	0	|	0	23	0	||	Unmodulated	0.208289
chr15:95881528	chr15	95881528	+	Intron	||	Ano6	||	0	3	2	||	0.214722	0	0.214722	||	2	12	0.166667	|	1	25	0.04	|	7	16	0.4375	||	0	7	0	|	0	0	NA	|	0	7	0	||	Unmodulated	0.208495
chr9:3386076	chr9	3386076	+	UTR	||	Alkbh8	||	25	3	3	||	0.0212698	0	0.0212698	||	0	46	0	|	1	42	0.0238095	|	1	25	0.04	||	0	45	0	|	0	26	0	|	0	30	0	||	Unmodulated	0.208582
chr6:47871725	chr6	47871725	+	intergenic	||	Zfp398	||	7	3	3	||	0.171296	0.0111111	0.160185	||	0	7	0	|	6	27	0.222222	|	7	24	0.291667	||	0	13	0	|	1	30	0.0333333	|	0	14	0	||	Unmodulated	0.208639
chr2:126803784	chr2	126803784	-	Intron	||	Trpm7	||	8	3	3	||	0.14359	0.0123457	0.131244	||	2	10	0.2	|	3	13	0.230769	|	0	11	0	||	0	8	0	|	1	27	0.037037	|	0	20	0	||	Unmodulated	0.208645
chr9:21373724	chr9	21373724	+	Intron	||	Ilf3	||	2	2	3	||	0	0.099537	-0.099537	||	0	2	0	|	0	12	0	|	0	8	0	||	1	9	0.111111	|	3	16	0.1875	|	0	17	0	||	Unmodulated	0.208976
chr5:65625398	chr5	65625398	-	Intron	||	Gm42729;Pds5a	||	4	3	2	||	0.099537	0	0.099537	||	0	8	0	|	3	16	0.1875	|	1	9	0.111111	||	0	6	0	|	0	10	0	|	0	4	0	||	Unmodulated	0.208976
chr17:47676251	chr17	47676251	+	Intron	||	Gm20517;Usp49	||	6	3	3	||	0.335317	0.0298895	0.305428	||	4	6	0.666667	|	3	24	0.125	|	3	14	0.214286	||	0	8	0	|	1	19	0.0526316	|	1	27	0.037037	||	Unmodulated	0.20923
chr4:3751919	chr4	3751919	+	Intron	||	Lyn	||	18	3	3	||	0.0230398	0	0.0230398	||	0	27	0	|	2	78	0.025641	|	2	46	0.0434783	||	0	36	0	|	0	48	0	|	0	18	0	||	Unmodulated	0.209405
chr8:72480157	chr8	72480157	-	intergenic	||	NA	||	7	3	3	||	0.0529412	0	0.0529412	||	1	10	0.1	|	0	27	0	|	1	17	0.0588235	||	0	7	0	|	0	19	0	|	0	30	0	||	Unmodulated	0.209634
chr3:116744083	chr3	116744083	-	UTR	||	Agl	||	17	3	3	||	0.0794118	0	0.0794118	||	3	20	0.15	|	0	28	0	|	3	34	0.0882353	||	0	18	0	|	0	17	0	|	0	21	0	||	Unmodulated	0.209634
chr3:90041895	chr3	90041895	-	Exon	||	Ubap2l	||	9	3	3	||	0.037037	0.151467	-0.11443	||	1	9	0.111111	|	0	22	0	|	0	25	0	||	5	18	0.277778	|	3	35	0.0857143	|	2	22	0.0909091	||	Unmodulated	0.20968
chr4:108232060	chr4	108232060	-	UTR	||	Zyg11b	||	18	3	3	||	0.0959596	0.0256039	0.0703557	||	3	18	0.166667	|	1	33	0.030303	|	4	44	0.0909091	||	1	23	0.0434783	|	2	60	0.0333333	|	0	37	0	||	Unmodulated	0.209747
chr5:121287597	chr5	121287597	+	Intron	||	Hectd4	||	10	3	3	||	0.0600932	0	0.0600932	||	2	16	0.125	|	1	57	0.0175439	|	2	53	0.0377358	||	0	10	0	|	0	86	0	|	0	132	0	||	Unmodulated	0.209955
chr2:132309656	chr2	132309656	+	UTR	||	Cds2	||	7	3	3	||	0.0603175	0	0.0603175	||	0	10	0	|	4	35	0.114286	|	2	30	0.0666667	||	0	7	0	|	0	36	0	|	0	45	0	||	Unmodulated	0.210387
chr19:45518315	chr19	45518315	+	Intron	||	Btrc	||	1	3	2	||	0.150794	0	0.150794	||	2	7	0.285714	|	1	6	0.166667	|	0	6	0	||	0	6	0	|	0	1	0	|	0	10	0	||	Unmodulated	0.210387
chr13:100296908	chr13	100296908	-	Exon	||	Naip6	||	14	3	3	||	0	0.0376984	-0.0376984	||	0	14	0	|	0	25	0	|	0	21	0	||	1	14	0.0714286	|	0	27	0	|	1	24	0.0416667	||	Unmodulated	0.210387
chr16:55993988	chr16	55993988	+	Intron	||	Zbtb11	||	3	3	2	||	0.0565476	0	0.0565476	||	0	9	0	|	3	28	0.107143	|	1	16	0.0625	||	0	3	0	|	0	20	0	|	0	25	0	||	Unmodulated	0.210387
chr11:117662314	chr11	117662314	+	Intron	||	Tnrc6c	||	5	3	3	||	0.0944138	0.00666667	0.0877472	||	0	9	0	|	5	41	0.121951	|	5	31	0.16129	||	0	5	0	|	1	50	0.02	|	0	38	0	||	Unmodulated	0.210676
chr1:143755371	chr1	143755371	-	UTR	||	Trove2	||	5	3	3	||	0.0878136	0	0.0878136	||	0	7	0	|	3	31	0.0967742	|	2	12	0.166667	||	0	12	0	|	0	14	0	|	0	5	0	||	Unmodulated	0.210806
chr8:71890588	chr8	71890588	+	Exon	||	Zfp709	||	9	3	3	||	0.0478469	0	0.0478469	||	0	13	0	|	1	11	0.0909091	|	1	19	0.0526316	||	0	9	0	|	0	16	0	|	0	12	0	||	Unmodulated	0.211072
chr8:84911180	chr8	84911180	+	UTR	||	Dnase2a	||	20	3	3	||	0.152963	0	0.152963	||	1	20	0.05	|	4	45	0.0888889	|	8	25	0.32	||	0	50	0	|	0	33	0	|	0	60	0	||	Unmodulated	0.211158
chr11:75176384	chr11	75176384	-	UTR	||	1700016P03Rik;Ovca2	||	16	3	3	||	0.0700855	0	0.0700855	||	0	21	0	|	3	39	0.0769231	|	4	30	0.133333	||	0	23	0	|	0	16	0	|	0	22	0	||	Unmodulated	0.211393
chr3:96147462	chr3	96147462	+	Intron	||	Otud7b	||	0	2	2	||	0.125	0.0444444	0.0805556	||	0	0	NA	|	2	16	0.125	|	1	8	0.125	||	0	4	0	|	2	15	0.133333	|	0	14	0	||	Unmodulated	0.211595
chr1:86347802	chr1	86347802	-	UTR	||	Ncl	||	16	3	3	||	0.151726	0	0.151726	||	1	16	0.0625	|	5	68	0.0735294	|	15	47	0.319149	||	0	50	0	|	0	73	0	|	0	48	0	||	Unmodulated	0.211813
chr2:91701651	chr2	91701651	-	Intron	||	Atg13	||	3	2	2	||	0.130952	0	0.130952	||	0	3	0	|	2	8	0.25	|	1	7	0.142857	||	0	3	0	|	0	12	0	|	0	18	0	||	Unmodulated	0.212274
chr4:62342173	chr4	62342173	-	Intron	||	Fkbp15	||	2	2	3	||	0.130952	0	0.130952	||	0	2	0	|	2	14	0.142857	|	3	12	0.25	||	0	7	0	|	0	6	0	|	0	13	0	||	Unmodulated	0.212274
chr7:102471874	chr7	102471874	+	intergenic	||	NA	||	4	2	3	||	0.130952	0	0.130952	||	0	4	0	|	2	8	0.25	|	1	7	0.142857	||	0	6	0	|	0	10	0	|	0	17	0	||	Unmodulated	0.212274
chr2:120100916	chr2	120100916	-	Intron	||	Ehd4	||	3	2	2	||	0.261905	0	0.261905	||	2	4	0.5	|	2	7	0.285714	|	0	5	0	||	0	3	0	|	0	7	0	|	0	7	0	||	Unmodulated	0.212274
chr2:120100917	chr2	120100917	-	Intron	||	Ehd4	||	3	2	2	||	0.261905	0	0.261905	||	2	4	0.5	|	2	7	0.285714	|	0	5	0	||	0	3	0	|	0	8	0	|	0	7	0	||	Unmodulated	0.212274
chr17:13020009	chr17	13020009	+	intergenic	||	NA	||	8	3	3	||	0.0654762	0	0.0654762	||	0	9	0	|	1	14	0.0714286	|	1	8	0.125	||	0	15	0	|	0	54	0	|	0	25	0	||	Unmodulated	0.212274
chr2:118869918	chr2	118869918	+	Exon	||	Ivd	||	0	3	2	||	0.0654762	0	0.0654762	||	1	8	0.125	|	1	14	0.0714286	|	0	9	0	||	0	0	NA	|	0	5	0	|	0	7	0	||	Unmodulated	0.212274
chr17:24407148	chr17	24407148	-	Intron	||	Abca3;D330041H03Rik	||	3	3	2	||	0.159596	0	0.159596	||	2	6	0.333333	|	1	22	0.0454545	|	1	10	0.1	||	0	3	0	|	0	8	0	|	0	23	0	||	Unmodulated	0.212379
chr9:73096650	chr9	73096650	+	UTR	||	Rab27a	||	24	3	3	||	0.0792638	0	0.0792638	||	4	24	0.166667	|	1	35	0.0285714	|	2	47	0.0425532	||	0	34	0	|	0	35	0	|	0	65	0	||	Unmodulated	0.212658
chr2:132306210	chr2	132306210	+	UTR	||	Cds2	||	26	3	3	||	0.0270453	0	0.0270453	||	0	40	0	|	2	68	0.0294118	|	3	58	0.0517241	||	0	26	0	|	0	48	0	|	0	68	0	||	Unmodulated	0.21273
chr8:124894165	chr8	124894165	-	UTR	||	Exoc8	||	14	3	3	||	0.0540906	0	0.0540906	||	0	14	0	|	3	29	0.103448	|	2	34	0.0588235	||	0	21	0	|	0	20	0	|	0	37	0	||	Unmodulated	0.21273
chr12:111645822	chr12	111645822	+	Intron	||	Mark3	||	12	3	3	||	0.120101	0	0.120101	||	3	12	0.25	|	1	33	0.030303	|	2	25	0.08	||	0	12	0	|	0	14	0	|	0	38	0	||	Unmodulated	0.212732
chr9:44292779	chr9	44292779	-	intergenic	||	Hinfp	||	10	3	3	||	0.0955338	0	0.0955338	||	2	10	0.2	|	2	34	0.0588235	|	1	36	0.0277778	||	0	11	0	|	0	41	0	|	0	26	0	||	Unmodulated	0.213226
chr11:82962617	chr11	82962617	+	UTR	||	Slfn5	||	8	3	3	||	0.115741	0	0.115741	||	1	8	0.125	|	6	27	0.222222	|	0	18	0	||	0	11	0	|	0	24	0	|	0	26	0	||	Unmodulated	0.213743
chr2:37415353	chr2	37415353	-	Intron	||	Rc3h2	||	4	2	3	||	0.246257	0.0196078	0.226649	||	2	4	0.5	|	6	47	0.12766	|	3	27	0.111111	||	1	17	0.0588235	|	0	24	0	|	0	32	0	||	Unmodulated	0.213989
chr11:52126806	chr11	52126806	+	UTR	||	9430098F02Rik;Gm26551;Mir3061;Ppp2ca	||	4	2	3	||	0.0371429	0	0.0371429	||	0	4	0	|	1	14	0.0714286	|	1	25	0.04	||	0	13	0	|	0	22	0	|	0	35	0	||	Unmodulated	0.214163
chr4:62344284	chr4	62344284	-	Exon	||	Fkbp15	||	17	3	3	||	0.0138889	0.121289	-0.1074	||	0	20	0	|	0	35	0	|	1	24	0.0416667	||	4	17	0.235294	|	1	35	0.0285714	|	3	30	0.1	||	Unmodulated	0.214308
chr11:77426829	chr11	77426829	+	Intron	||	Ssh2	||	4	3	2	||	0.015873	0.244344	-0.228471	||	0	15	0	|	2	42	0.047619	|	0	25	0	||	2	4	0.5	|	3	26	0.115385	|	2	17	0.117647	||	Unmodulated	0.214341
chr9:123520968	chr9	123520968	+	UTR	||	Limd1	||	85	3	3	||	0.0520821	0.00362319	0.0484589	||	9	85	0.105882	|	4	127	0.0314961	|	2	106	0.0188679	||	0	108	0	|	1	92	0.0108696	|	0	96	0	||	Unmodulated	0.214505
chr10:50738220	chr10	50738220	+	Intron	||	Ascc3	||	8	3	3	||	0.271717	0.0666667	0.205051	||	4	8	0.5	|	2	15	0.133333	|	2	11	0.181818	||	2	10	0.2	|	0	13	0	|	0	16	0	||	Unmodulated	0.214793
chr4:59530258	chr4	59530258	-	Intron	||	Ptbp3	||	10	3	3	||	0.17963	0.0494505	0.130179	||	3	10	0.3	|	2	45	0.0444444	|	7	36	0.194444	||	1	14	0.0714286	|	2	26	0.0769231	|	0	38	0	||	Unmodulated	0.214817
chr4:136565190	chr4	136565190	-	Intron	||	Kdm1a	||	7	3	3	||	0.177941	0	0.177941	||	1	10	0.1	|	1	17	0.0588235	|	3	8	0.375	||	0	7	0	|	0	14	0	|	0	20	0	||	Unmodulated	0.214843
chr15:81900310	chr15	81900310	+	Intron	||	Aco2	||	5	3	3	||	0	0.207407	-0.207407	||	0	8	0	|	0	7	0	|	0	6	0	||	2	5	0.4	|	0	6	0	|	2	9	0.222222	||	Unmodulated	0.214919
chr13:49531582	chr13	49531582	+	UTR	||	Cenpp;Ecm2	||	8	3	3	||	0	0.103704	-0.103704	||	0	8	0	|	0	23	0	|	0	8	0	||	2	10	0.2	|	1	9	0.111111	|	0	23	0	||	Unmodulated	0.214919
chr9:56915680	chr9	56915680	-	intergenic	||	NA	||	1	3	2	||	0.103704	0	0.103704	||	1	5	0.2	|	1	9	0.111111	|	0	5	0	||	0	5	0	|	0	5	0	|	0	1	0	||	Unmodulated	0.214919
chr3:88687952	chr3	88687952	+	Exon	||	2810403A07Rik	||	4	3	2	||	0.207407	0	0.207407	||	4	10	0.4	|	0	22	0	|	4	18	0.222222	||	0	4	0	|	0	15	0	|	0	17	0	||	Unmodulated	0.214919
chr14:27456982	chr14	27456982	+	Intron	||	Fam208a	||	8	3	3	||	0.295392	0.0944444	0.200947	||	5	10	0.5	|	4	31	0.129032	|	9	35	0.257143	||	2	8	0.25	|	1	30	0.0333333	|	0	29	0	||	Unmodulated	0.215211
chr10:58463534	chr10	58463534	+	Intron	||	Ranbp2	||	8	3	3	||	0	0.0398254	-0.0398254	||	0	8	0	|	0	24	0	|	0	10	0	||	1	13	0.0769231	|	2	47	0.0425532	|	0	38	0	||	Unmodulated	0.215326
chr17:46499880	chr17	46499880	+	Intron	||	Gm26904	||	2	2	3	||	0.281818	0	0.281818	||	6	11	0.545455	|	3	10	0.3	|	0	2	0	||	0	23	0	|	0	21	0	|	0	6	0	||	Unmodulated	0.215881
chr2:126891470	chr2	126891470	-	UTR	||	Sppl2a	||	4	3	2	||	0.0939394	0	0.0939394	||	1	10	0.1	|	0	41	0	|	4	22	0.181818	||	0	6	0	|	0	4	0	|	0	13	0	||	Unmodulated	0.215881
chr4:108232180	chr4	108232180	-	UTR	||	Zyg11b	||	17	3	3	||	0.0336439	0	0.0336439	||	0	20	0	|	1	28	0.0357143	|	3	46	0.0652174	||	0	17	0	|	0	77	0	|	0	34	0	||	Unmodulated	0.216298
chr12:36019125	chr12	36019125	-	Intron	||	Tspan13	||	3	2	2	||	0.157143	0	0.157143	||	1	3	0.333333	|	1	14	0.0714286	|	1	15	0.0666667	||	0	4	0	|	0	14	0	|	0	13	0	||	Unmodulated	0.21643
chr2:5019752	chr2	5019752	-	intergenic	||	NA	||	7	3	3	||	0.13097	0	0.13097	||	1	16	0.0625	|	1	19	0.0526316	|	5	18	0.277778	||	0	7	0	|	0	10	0	|	0	24	0	||	Unmodulated	0.216545
chr1:179529824	chr1	179529824	-	Intron	||	Tfb2m	||	3	2	3	||	0.171717	0	0.171717	||	1	3	0.333333	|	2	11	0.181818	|	0	11	0	||	0	6	0	|	0	10	0	|	0	13	0	||	Unmodulated	0.216681
chr11:77521516	chr11	77521516	+	Intron	||	Abhd15	||	6	3	3	||	0.171717	0	0.171717	||	2	6	0.333333	|	2	11	0.181818	|	0	16	0	||	0	17	0	|	0	15	0	|	0	13	0	||	Unmodulated	0.216681
chr13:24815643	chr13	24815643	+	intergenic	||	BC005537	||	9	3	3	||	0.171717	0	0.171717	||	3	9	0.333333	|	0	21	0	|	2	11	0.181818	||	0	14	0	|	0	27	0	|	0	53	0	||	Unmodulated	0.216681
chr14:86658575	chr14	86658575	-	Intron	||	Diaph3	||	1	2	2	||	0.472222	0	0.472222	||	1	1	1	|	3	12	0.25	|	1	6	0.166667	||	0	10	0	|	0	3	0	|	0	14	0	||	Unmodulated	0.216681
chr9:72474121	chr9	72474121	-	Exon	||	Tex9	||	6	3	3	||	0	0.0858586	-0.0858586	||	0	6	0	|	0	14	0	|	0	9	0	||	2	12	0.166667	|	1	11	0.0909091	|	0	23	0	||	Unmodulated	0.216681
chr6:86414940	chr6	86414940	+	Exon	||	Tia1	||	6	3	3	||	0	0.0858586	-0.0858586	||	0	12	0	|	0	13	0	|	0	16	0	||	0	6	0	|	1	11	0.0909091	|	2	12	0.166667	||	Unmodulated	0.216681
chr10:128800542	chr10	128800542	+	UTR	||	AC131081.1;Mmp19;Tmem198b	||	6	3	3	||	0.0858586	0	0.0858586	||	1	6	0.166667	|	0	12	0	|	1	11	0.0909091	||	0	19	0	|	0	6	0	|	0	9	0	||	Unmodulated	0.216681
chr11:58327308	chr11	58327308	-	Exon	||	Zfp672	||	2	3	2	||	0.0498019	0	0.0498019	||	0	12	0	|	3	31	0.0967742	|	1	19	0.0526316	||	0	2	0	|	0	18	0	|	0	14	0	||	Unmodulated	0.216965
chr9:32488239	chr9	32488239	-	Intron	||	Fli1	||	4	3	2	||	0.0411594	0	0.0411594	||	0	9	0	|	2	46	0.0434783	|	2	25	0.08	||	0	4	0	|	0	17	0	|	0	17	0	||	Unmodulated	0.217033
chr6:57809931	chr6	57809931	-	Intron	||	Vopp1	||	13	3	3	||	0.140832	0.00740741	0.133425	||	4	14	0.285714	|	6	58	0.103448	|	1	30	0.0333333	||	0	13	0	|	1	45	0.0222222	|	0	51	0	||	Unmodulated	0.217154
chr11:52123600	chr11	52123600	+	UTR	||	Gm26551;Ppp2ca	||	2	2	2	||	0.0790598	0	0.0790598	||	2	13	0.153846	|	0	2	0	|	1	12	0.0833333	||	0	3	0	|	0	14	0	|	0	14	0	||	Unmodulated	0.217358
chr11:105247769	chr11	105247769	+	Intron	||	Tlk2	||	5	3	3	||	0.128788	0.0208333	0.107955	||	1	11	0.0909091	|	2	8	0.25	|	1	22	0.0454545	||	0	5	0	|	1	16	0.0625	|	0	5	0	||	Unmodulated	0.217571
chr14:52093203	chr14	52093203	-	Intron	||	Hnrnpc	||	19	3	3	||	0.0612053	0.017094	0.0441113	||	2	20	0.1	|	1	59	0.0169492	|	3	45	0.0666667	||	0	19	0	|	2	39	0.0512821	|	0	39	0	||	Unmodulated	0.217613
chr7:144484101	chr7	144484101	-	Intron	||	Ppfia1	||	4	2	2	||	0.333333	0.0416667	0.291667	||	4	8	0.5	|	2	4	0.5	|	0	5	0	||	0	4	0	|	0	8	0	|	1	8	0.125	||	Unmodulated	0.217657
chr7:127578983	chr7	127578983	+	Exon	||	Phkg2	||	12	3	3	||	0.02442	0	0.02442	||	1	21	0.047619	|	1	39	0.025641	|	0	12	0	||	0	13	0	|	0	20	0	|	0	23	0	||	Unmodulated	0.217938
chr18:56792204	chr18	56792204	-	Intron	||	Gm15345;March3	||	0	2	3	||	0.0868056	0.286275	-0.199469	||	0	0	NA	|	1	9	0.111111	|	1	16	0.0625	||	2	5	0.4	|	6	15	0.4	|	3	51	0.0588235	||	Unmodulated	0.218142
chr17:25929308	chr17	25929308	-	Intron	||	Gm16278;Gm26694;Pigq	||	31	3	3	||	0.13654	0	0.13654	||	9	31	0.290323	|	4	60	0.0666667	|	3	57	0.0526316	||	0	49	0	|	0	38	0	|	0	60	0	||	Unmodulated	0.21818
chr16:20544767	chr16	20544767	+	UTR	||	Ap2m1	||	5	3	3	||	0.358333	0	0.358333	||	0	5	0	|	3	8	0.375	|	7	10	0.7	||	0	5	0	|	0	7	0	|	0	7	0	||	Unmodulated	0.21844
chr8:111552489	chr8	111552489	+	Intron	||	Znrf1	||	7	3	3	||	0.191667	0	0.191667	||	3	8	0.375	|	2	10	0.2	|	0	10	0	||	0	7	0	|	0	8	0	|	0	18	0	||	Unmodulated	0.218879
chr2:90559778	chr2	90559778	-	Intron	||	Ptprj	||	6	3	3	||	0.104438	0	0.104438	||	2	9	0.222222	|	1	26	0.0384615	|	1	19	0.0526316	||	0	7	0	|	0	6	0	|	0	12	0	||	Unmodulated	0.218896
chr11:75300631	chr11	75300631	-	UTR	||	Rpa1	||	236	3	3	||	0.0939211	0.00582242	0.0880987	||	57	301	0.189369	|	6	289	0.0207612	|	25	349	0.0716332	||	1	344	0.00290698	|	3	236	0.0127119	|	1	541	0.00184843	||	Unmodulated	0.219256
chr8:124894180	chr8	124894180	-	UTR	||	Exoc8	||	14	3	3	||	0.0582973	0	0.0582973	||	0	14	0	|	2	33	0.0606061	|	4	35	0.114286	||	0	20	0	|	0	18	0	|	0	34	0	||	Unmodulated	0.219443
chr8:129219405	chr8	129219405	-	Exon	||	2610044O15Rik8	||	6	3	3	||	0	0.0566449	-0.0566449	||	0	6	0	|	0	13	0	|	0	27	0	||	1	17	0.0588235	|	2	18	0.111111	|	0	14	0	||	Unmodulated	0.21961
chr17:23808648	chr17	23808648	+	Exon	||	Srrm2	||	6	3	3	||	0.00980392	0.0972222	-0.0874183	||	0	6	0	|	1	34	0.0294118	|	0	10	0	||	1	6	0.166667	|	0	18	0	|	2	16	0.125	||	Unmodulated	0.219864
chr17:24176454	chr17	24176454	-	UTR	||	Gm43796;Tbc1d24	||	12	3	3	||	0.157778	0	0.157778	||	4	12	0.333333	|	2	20	0.1	|	1	25	0.04	||	0	27	0	|	0	45	0	|	0	39	0	||	Unmodulated	0.219874
chr1:86354747	chr1	86354747	-	Intron	||	Ncl	||	16	3	3	||	0.0804094	0	0.0804094	||	3	19	0.157895	|	0	36	0	|	2	24	0.0833333	||	0	20	0	|	0	29	0	|	0	16	0	||	Unmodulated	0.219917
chr8:124893874	chr8	124893874	-	UTR	||	Exoc8	||	18	3	3	||	0.214425	0	0.214425	||	8	19	0.421053	|	0	25	0	|	4	18	0.222222	||	0	22	0	|	0	19	0	|	0	19	0	||	Unmodulated	0.219917
chr9:21682984	chr9	21682984	+	Intron	||	Smarca4	||	24	3	3	||	0.0581132	0.00952381	0.0485893	||	8	70	0.114286	|	5	154	0.0324675	|	4	145	0.0275862	||	1	35	0.0285714	|	0	24	0	|	0	34	0	||	Unmodulated	0.220021
chr14:31701475	chr14	31701475	-	UTR	||	Ankrd28	||	10	3	3	||	0.075	0.00854701	0.066453	||	1	10	0.1	|	4	32	0.125	|	0	28	0	||	0	36	0	|	0	28	0	|	1	39	0.025641	||	Unmodulated	0.22013
chrX:93509618	chrX	93509618	-	Intron	||	Pola1	||	3	2	3	||	0.470383	0	0.470383	||	3	3	1	|	11	41	0.268293	|	3	21	0.142857	||	0	5	0	|	0	17	0	|	0	28	0	||	Unmodulated	0.220486
chr10:122690744	chr10	122690744	+	Intron	||	Ppm1h	||	9	3	3	||	0.0923521	0	0.0923521	||	2	11	0.181818	|	0	15	0	|	2	21	0.0952381	||	0	9	0	|	0	19	0	|	0	18	0	||	Unmodulated	0.22067
chr5:29771793	chr5	29771793	+	Intron	||	Dnajb6	||	6	3	3	||	0.0845411	0	0.0845411	||	1	6	0.166667	|	2	23	0.0869565	|	0	23	0	||	0	11	0	|	0	22	0	|	0	19	0	||	Unmodulated	0.221067
chr11:115683365	chr11	115683365	-	Intron	||	Grb2	||	2	3	2	||	0.0672417	0	0.0672417	||	1	7	0.142857	|	1	53	0.0188679	|	1	25	0.04	||	0	2	0	|	0	16	0	|	0	23	0	||	Unmodulated	0.221205
chr11:90670294	chr11	90670294	-	Intron	||	Tom1l1	||	6	3	3	||	0	0.0389744	-0.0389744	||	0	13	0	|	0	30	0	|	0	6	0	||	1	13	0.0769231	|	1	25	0.04	|	0	47	0	||	Unmodulated	0.221403
chr7:55961304	chr7	55961304	-	Intron	||	Nipa2	||	5	3	3	||	0.208081	0.0414141	0.166667	||	2	5	0.4	|	2	15	0.133333	|	1	11	0.0909091	||	1	11	0.0909091	|	0	9	0	|	1	30	0.0333333	||	Unmodulated	0.222096
chr9:21446869	chr9	21446869	+	Intron	||	Dnm2	||	8	3	3	||	0.154483	0.047619	0.106864	||	2	8	0.25	|	2	36	0.0555556	|	3	19	0.157895	||	2	14	0.142857	|	0	16	0	|	0	12	0	||	Unmodulated	0.222128
chr10:20315778	chr10	20315778	+	Intron	||	Bclaf1	||	8	3	3	||	0.0125786	0.0632046	-0.050626	||	0	8	0	|	2	53	0.0377358	|	0	45	0	||	3	25	0.12	|	2	41	0.0487805	|	1	48	0.0208333	||	Unmodulated	0.222493
chr6:38289116	chr6	38289116	-	UTR	||	Zc3hav1l	||	7	3	3	||	0.280423	0	0.280423	||	2	7	0.285714	|	0	16	0	|	5	9	0.555556	||	0	9	0	|	0	9	0	|	0	14	0	||	Unmodulated	0.222519
chr9:72459553	chr9	72459553	+	UTR	||	Mns1;Tex9	||	11	3	3	||	0.0560847	0	0.0560847	||	0	20	0	|	2	35	0.0571429	|	5	45	0.111111	||	0	11	0	|	0	36	0	|	0	38	0	||	Unmodulated	0.222519
chr12:70994601	chr12	70994601	+	UTR	||	3110056K07Rik;Psma3	||	19	3	3	||	0.049187	0	0.049187	||	0	27	0	|	2	40	0.05	|	4	41	0.097561	||	0	28	0	|	0	19	0	|	0	29	0	||	Unmodulated	0.222873
chr9:73096649	chr9	73096649	+	UTR	||	Rab27a	||	23	3	3	||	0.0811003	0	0.0811003	||	4	23	0.173913	|	1	35	0.0285714	|	2	49	0.0408163	||	0	33	0	|	0	36	0	|	0	60	0	||	Unmodulated	0.223533
chr9:65904016	chr9	65904016	+	Intron	||	Trip4	||	1	2	3	||	0.471596	0	0.471596	||	1	1	1	|	2	19	0.105263	|	13	42	0.309524	||	0	6	0	|	0	37	0	|	0	85	0	||	Unmodulated	0.223611
chr8:123955030	chr8	123955030	-	Intron	||	Abcb10;Gm20388;Gm45890	||	23	3	3	||	0.0553955	0.020202	0.0351935	||	2	28	0.0714286	|	1	31	0.0322581	|	2	32	0.0625	||	0	23	0	|	2	33	0.0606061	|	0	56	0	||	Unmodulated	0.223622
chr7:75776812	chr7	75776812	-	Intron	||	AU020206	||	24	3	3	||	0.0239051	0	0.0239051	||	2	42	0.047619	|	0	97	0	|	2	83	0.0240964	||	0	24	0	|	0	40	0	|	0	45	0	||	Unmodulated	0.224171
chr7:104339271	chr7	104339271	-	UTR	||	Trim12c	||	20	3	3	||	0.142961	0	0.142961	||	6	20	0.3	|	1	46	0.0217391	|	3	28	0.107143	||	0	21	0	|	0	24	0	|	0	27	0	||	Unmodulated	0.224505
chr3:88703307	chr3	88703307	+	Intron	||	2810403A07Rik	||	11	3	3	||	0.265114	0.0133333	0.251781	||	11	20	0.55	|	2	28	0.0714286	|	4	23	0.173913	||	0	11	0	|	0	29	0	|	1	25	0.04	||	Unmodulated	0.224886
chr7:97130197	chr7	97130197	+	Intron	||	Gab2	||	2	2	2	||	0.0196078	0.229798	-0.21019	||	0	2	0	|	1	17	0.0588235	|	0	6	0	||	5	12	0.416667	|	3	11	0.272727	|	0	4	0	||	Unmodulated	0.225366
chr7:34364026	chr7	34364026	-	Intron	||	Gm44567;Lsm14a	||	3	3	2	||	0.166667	0	0.166667	||	2	6	0.333333	|	0	6	0	|	2	12	0.166667	||	0	3	0	|	0	11	0	|	0	14	0	||	Unmodulated	0.225403
chr7:101915906	chr7	101915906	+	Intron	||	Lamtor1;Lrrc51	||	1	2	2	||	0.166667	0	0.166667	||	1	3	0.333333	|	0	13	0	|	1	6	0.166667	||	0	1	0	|	0	5	0	|	0	16	0	||	Unmodulated	0.225403
chr9:46033739	chr9	46033739	+	Intron	||	Sik3	||	2	3	2	||	0.166667	0	0.166667	||	1	6	0.166667	|	4	12	0.333333	|	0	6	0	||	0	2	0	|	0	8	0	|	0	5	0	||	Unmodulated	0.225403
chr2:120602258	chr2	120602258	+	intergenic	||	NA	||	9	3	3	||	0.0555556	0	0.0555556	||	1	9	0.111111	|	0	26	0	|	1	18	0.0555556	||	0	15	0	|	0	29	0	|	0	22	0	||	Unmodulated	0.225403
chr5:34387350	chr5	34387350	+	Intron	||	Fam193a	||	8	3	3	||	0	0.25	-0.25	||	0	8	0	|	0	39	0	|	0	20	0	||	9	18	0.5	|	3	12	0.25	|	0	26	0	||	Unmodulated	0.225403
chr16:13871534	chr16	13871534	-	Intron	||	Pdxdc1	||	3	2	2	||	0	0.2	-0.2	||	0	4	0	|	0	9	0	|	0	5	0	||	2	5	0.4	|	1	5	0.2	|	0	3	0	||	Unmodulated	0.225403
chr3:103314756	chr3	103314756	+	Intron	||	Trim33	||	4	2	2	||	0	0.125	-0.125	||	0	4	0	|	0	24	0	|	0	23	0	||	1	4	0.25	|	0	19	0	|	2	16	0.125	||	Unmodulated	0.225403
chr7:97098472	chr7	97098472	+	Intron	||	Gab2	||	20	3	3	||	0.0384615	0	0.0384615	||	1	26	0.0384615	|	3	39	0.0769231	|	0	32	0	||	0	20	0	|	0	45	0	|	0	36	0	||	Unmodulated	0.225403
chr13:43443545	chr13	43443545	-	Intron	||	Ranbp9	||	11	3	3	||	0.0416667	0	0.0416667	||	1	12	0.0833333	|	0	29	0	|	1	24	0.0416667	||	0	11	0	|	0	11	0	|	0	16	0	||	Unmodulated	0.225403
chr16:4401840	chr16	4401840	-	Intron	||	Adcy9	||	4	3	2	||	0.0625	0	0.0625	||	1	8	0.125	|	1	16	0.0625	|	0	10	0	||	0	9	0	|	0	7	0	|	0	4	0	||	Unmodulated	0.225403
chr2:154587071	chr2	154587071	-	UTR	||	Pxmp4	||	5	3	3	||	0.1	0	0.1	||	0	6	0	|	1	10	0.1	|	1	5	0.2	||	0	7	0	|	0	7	0	|	0	10	0	||	Unmodulated	0.225403
chr5:52198525	chr5	52198525	+	Intron	||	9230114K14Rik	||	9	3	3	||	0.105263	0	0.105263	||	0	16	0	|	4	19	0.210526	|	2	19	0.105263	||	0	9	0	|	0	9	0	|	0	16	0	||	Unmodulated	0.225403
chr2:71229207	chr2	71229207	+	Exon	||	Dync1i2	||	5	3	3	||	0.125	0	0.125	||	2	8	0.25	|	0	5	0	|	1	8	0.125	||	0	5	0	|	0	8	0	|	0	11	0	||	Unmodulated	0.225403
chr10:86993832	chr10	86993832	-	Intron	||	Gm16271;Stab2	||	2	2	3	||	0.142857	0	0.142857	||	0	2	0	|	1	7	0.142857	|	2	7	0.285714	||	0	5	0	|	0	13	0	|	0	5	0	||	Unmodulated	0.225403
chrX:151825584	chrX	151825584	+	Intron	||	Huwe1	||	3	3	2	||	0.142857	0	0.142857	||	1	7	0.142857	|	0	9	0	|	2	7	0.285714	||	0	3	0	|	0	14	0	|	0	7	0	||	Unmodulated	0.225403
chr4:116552863	chr4	116552863	-	UTR	||	Tmem69	||	10	3	3	||	0.2	0	0.2	||	3	15	0.2	|	0	15	0	|	4	10	0.4	||	0	15	0	|	0	14	0	|	0	14	0	||	Unmodulated	0.225403
chr9:88444651	chr9	88444651	-	Intron	||	Gm20537	||	5	3	3	||	0.2	0	0.2	||	2	5	0.4	|	0	7	0	|	1	5	0.2	||	0	7	0	|	0	8	0	|	0	5	0	||	Unmodulated	0.225403
chr7:118225888	chr7	118225888	-	Intron	||	Smg1	||	4	2	3	||	0.25	0	0.25	||	2	4	0.5	|	5	20	0.25	|	0	6	0	||	0	12	0	|	0	12	0	|	0	5	0	||	Unmodulated	0.225403
chr6:125194664	chr6	125194664	+	UTR	||	Mrpl51	||	1	2	2	||	0.25	0	0.25	||	2	4	0.5	|	0	14	0	|	2	8	0.25	||	0	1	0	|	0	9	0	|	0	10	0	||	Unmodulated	0.225403
chr3:106577321	chr3	106577321	+	intergenic	||	NA	||	1	2	2	||	0.5	0	0.5	||	2	2	1	|	4	8	0.5	|	0	6	0	||	0	1	0	|	0	13	0	|	0	6	0	||	Unmodulated	0.225403
chr18:31678906	chr18	31678906	+	Intron	||	Sap130	||	9	3	3	||	0	0.0769231	-0.0769231	||	0	14	0	|	0	23	0	|	0	9	0	||	2	13	0.153846	|	1	13	0.0769231	|	0	21	0	||	Unmodulated	0.225403
chr1:74582013	chr1	74582013	-	Intron	||	Zfp142	||	3	2	2	||	0.0769231	0	0.0769231	||	0	4	0	|	2	26	0.0769231	|	2	13	0.153846	||	0	3	0	|	0	14	0	|	0	11	0	||	Unmodulated	0.225403
chr9:37340064	chr9	37340064	-	Intron	||	Ccdc15	||	3	2	2	||	0.0769231	0	0.0769231	||	0	3	0	|	1	13	0.0769231	|	2	13	0.153846	||	0	3	0	|	0	11	0	|	0	8	0	||	Unmodulated	0.225403
chr7:29222877	chr7	29222877	-	UTR	||	Kcnk6	||	11	3	3	||	0.0909091	0	0.0909091	||	0	13	0	|	2	11	0.181818	|	2	22	0.0909091	||	0	20	0	|	0	12	0	|	0	14	0	||	Unmodulated	0.225403
chr11:52125960	chr11	52125960	+	UTR	||	9430098F02Rik;Gm26551;Ppp2ca	||	4	3	2	||	0.0909091	0	0.0909091	||	0	5	0	|	1	11	0.0909091	|	2	11	0.181818	||	0	4	0	|	0	12	0	|	0	23	0	||	Unmodulated	0.225403
chr11:78605674	chr11	78605674	-	Intron	||	Nlk	||	5	3	3	||	0.0833333	0	0.0833333	||	2	12	0.166667	|	0	8	0	|	1	12	0.0833333	||	0	6	0	|	0	5	0	|	0	8	0	||	Unmodulated	0.225403
chr2:70734616	chr2	70734616	-	Intron	||	Tlk1	||	6	3	3	||	0.0833333	0	0.0833333	||	1	6	0.166667	|	2	24	0.0833333	|	0	25	0	||	0	8	0	|	0	25	0	|	0	21	0	||	Unmodulated	0.225403
chr8:25762241	chr8	25762241	-	Intron	||	Gm17484	||	0	2	2	||	0.0833333	0	0.0833333	||	1	6	0.166667	|	1	12	0.0833333	|	0	2	0	||	0	0	NA	|	0	13	0	|	0	8	0	||	Unmodulated	0.225403
chr12:17429598	chr12	17429598	+	UTR	||	Nol10	||	2	3	2	||	0.0833333	0	0.0833333	||	1	12	0.0833333	|	0	19	0	|	2	12	0.166667	||	0	9	0	|	0	15	0	|	0	2	0	||	Unmodulated	0.225403
chr4:132772536	chr4	132772536	+	Intron	||	Rpa2	||	5	3	3	||	0.0833333	0	0.0833333	||	2	12	0.166667	|	1	12	0.0833333	|	0	12	0	||	0	5	0	|	0	11	0	|	0	23	0	||	Unmodulated	0.225403
chr10:82703894	chr10	82703894	+	Intron	||	Hcfc2	||	6	3	3	||	0.333333	0	0.333333	||	4	6	0.666667	|	0	36	0	|	2	6	0.333333	||	0	12	0	|	0	10	0	|	0	16	0	||	Unmodulated	0.225403
chr2:151034335	chr2	151034335	-	Intron	||	Nanp;Ninl	||	8	3	3	||	0.15	0.0196078	0.130392	||	2	8	0.25	|	0	10	0	|	3	15	0.2	||	1	17	0.0588235	|	0	24	0	|	0	33	0	||	Unmodulated	0.225457
chr1:164228283	chr1	164228283	+	intergenic	||	NA	||	3	3	2	||	0.33612	0.672222	-0.336103	||	3	38	0.0789474	|	9	17	0.529412	|	18	45	0.4	||	7	20	0.35	|	6	9	0.666667	|	3	3	1	||	Unmodulated	0.225814
chr14:7937178	chr14	7937178	+	Intron	||	Flnb	||	1	2	3	||	0.047619	0.128571	-0.0809524	||	0	1	0	|	0	6	0	|	1	7	0.142857	||	1	7	0.142857	|	1	10	0.1	|	1	7	0.142857	||	Unmodulated	0.225967
chr14:31700648	chr14	31700648	-	UTR	||	Ankrd28	||	54	3	3	||	0.0861484	0	0.0861484	||	10	54	0.185185	|	2	78	0.025641	|	3	63	0.047619	||	0	72	0	|	0	80	0	|	0	86	0	||	Unmodulated	0.226558
chr11:20067535	chr11	20067535	-	Intron	||	Actr2	||	7	3	3	||	0.00925926	0.0673401	-0.0580808	||	0	11	0	|	1	36	0.0277778	|	0	17	0	||	1	9	0.111111	|	2	22	0.0909091	|	0	7	0	||	Unmodulated	0.22659
chr16:35926916	chr16	35926916	-	UTR	||	Dtx3l	||	19	3	3	||	0.0746914	0	0.0746914	||	3	20	0.15	|	0	28	0	|	2	27	0.0740741	||	0	23	0	|	0	19	0	|	0	30	0	||	Unmodulated	0.226691
chr9:99277171	chr9	99277171	+	Intron	||	Cep70	||	6	3	3	||	0.236111	0.0350877	0.201023	||	3	8	0.375	|	0	7	0	|	2	6	0.333333	||	0	11	0	|	0	9	0	|	2	19	0.105263	||	Unmodulated	0.22721
chr11:101206800	chr11	101206800	-	Intron	||	Ezh1	||	3	2	3	||	0.154321	0	0.154321	||	1	3	0.333333	|	2	27	0.0740741	|	1	18	0.0555556	||	0	10	0	|	0	16	0	|	0	18	0	||	Unmodulated	0.227379
chr4:109332838	chr4	109332838	+	Intron	||	Eps15	||	9	3	3	||	0	0.0596078	-0.0596078	||	0	9	0	|	0	13	0	|	0	20	0	||	0	9	0	|	1	17	0.0588235	|	3	25	0.12	||	Unmodulated	0.22746
chr16:32625315	chr16	32625315	+	Intron	||	Tfrc	||	57	3	3	||	0.0649	0	0.0649	||	8	57	0.140351	|	6	209	0.0287081	|	3	117	0.025641	||	0	61	0	|	0	142	0	|	0	233	0	||	Unmodulated	0.227599
chr5:90302446	chr5	90302446	-	Intron	||	Ankrd17	||	11	3	3	||	0.144444	0.0114943	0.13295	||	4	15	0.266667	|	0	37	0	|	2	12	0.166667	||	0	11	0	|	0	16	0	|	1	29	0.0344828	||	Unmodulated	0.22768
chr5:121287626	chr5	121287626	+	Intron	||	Hectd4	||	7	3	3	||	0.0451178	0	0.0451178	||	1	11	0.0909091	|	0	48	0	|	2	45	0.0444444	||	0	7	0	|	0	75	0	|	0	95	0	||	Unmodulated	0.227739
chr16:16880857	chr16	16880857	+	Intron	||	Top3b	||	7	3	3	||	0.197802	0.030303	0.167499	||	2	7	0.285714	|	0	15	0	|	4	13	0.307692	||	1	11	0.0909091	|	0	15	0	|	0	17	0	||	Unmodulated	0.227803
chr15:103247674	chr15	103247674	-	intergenic	||	NA	||	10	3	3	||	0.163492	0.0138889	0.149603	||	3	10	0.3	|	0	20	0	|	4	21	0.190476	||	0	11	0	|	1	24	0.0416667	|	0	31	0	||	Unmodulated	0.227899
chr4:116552808	chr4	116552808	-	UTR	||	Tmem69	||	11	3	3	||	0.165344	0	0.165344	||	1	18	0.0555556	|	2	24	0.0833333	|	5	14	0.357143	||	0	22	0	|	0	11	0	|	0	20	0	||	Unmodulated	0.227909
chr1:171698140	chr1	171698140	+	Intron	||	Cd48	||	2	3	2	||	0.198413	0	0.198413	||	3	7	0.428571	|	4	40	0.1	|	2	30	0.0666667	||	0	6	0	|	0	10	0	|	0	2	0	||	Unmodulated	0.227909
chr17:35858923	chr17	35858923	+	UTR	||	Mdc1	||	34	3	3	||	0.0275275	0	0.0275275	||	1	37	0.027027	|	3	54	0.0555556	|	0	54	0	||	0	39	0	|	0	34	0	|	0	90	0	||	Unmodulated	0.228255
chr2:152273022	chr2	152273022	+	Exon	||	Csnk2a1	||	12	3	3	||	0.078391	0.00775194	0.0706391	||	5	31	0.16129	|	3	73	0.0410959	|	2	61	0.0327869	||	0	12	0	|	1	43	0.0232558	|	0	25	0	||	Unmodulated	0.228262
chr11:96807062	chr11	96807062	+	UTR	||	Cbx1	||	74	3	3	||	0.0395123	0	0.0395123	||	8	95	0.0842105	|	1	137	0.00729927	|	2	74	0.027027	||	0	78	0	|	0	109	0	|	0	92	0	||	Unmodulated	0.228807
chr6:58673347	chr6	58673347	+	Intron	||	Abcg2	||	20	3	3	||	0.0613553	0.00740741	0.0539479	||	2	26	0.0769231	|	0	33	0	|	3	28	0.107143	||	0	20	0	|	0	40	0	|	1	45	0.0222222	||	Unmodulated	0.229044
chr19:36999235	chr19	36999235	+	Intron	||	Btaf1	||	4	3	2	||	0.0706076	0	0.0706076	||	1	7	0.142857	|	0	15	0	|	2	29	0.0689655	||	0	4	0	|	0	36	0	|	0	30	0	||	Unmodulated	0.229064
chr5:125457465	chr5	125457465	+	UTR	||	Bri3bp	||	14	3	3	||	0.0706076	0	0.0706076	||	2	14	0.142857	|	2	29	0.0689655	|	0	23	0	||	0	19	0	|	0	15	0	|	0	26	0	||	Unmodulated	0.229064
chr14:21529430	chr14	21529430	+	Intron	||	Kat6b	||	0	2	2	||	0.294613	0.0833333	0.211279	||	2	4	0.5	|	1	9	0.111111	|	3	11	0.272727	||	0	0	NA	|	0	11	0	|	1	6	0.166667	||	Unmodulated	0.229169
chr3:89379234	chr3	89379234	-	UTR	||	Zbtb7b	||	5	3	3	||	0.0731922	0	0.0731922	||	0	5	0	|	4	27	0.148148	|	1	14	0.0714286	||	0	10	0	|	0	17	0	|	0	27	0	||	Unmodulated	0.229198
chr17:24939047	chr17	24939047	-	intergenic	||	NA	||	3	2	3	||	0.311111	0	0.311111	||	2	3	0.666667	|	1	15	0.0666667	|	2	10	0.2	||	0	10	0	|	0	14	0	|	0	5	0	||	Unmodulated	0.229325
chr15:34926958	chr15	34926958	-	Intron	||	Stk3	||	0	2	2	||	0.11396	0	0.11396	||	0	2	0	|	1	9	0.111111	|	3	13	0.230769	||	0	0	NA	|	0	6	0	|	0	5	0	||	Unmodulated	0.229343
chr14:73261428	chr14	73261428	-	Intron	||	Rb1	||	18	3	3	||	0.0771474	0	0.0771474	||	3	18	0.166667	|	2	90	0.0222222	|	2	47	0.0425532	||	0	20	0	|	0	71	0	|	0	91	0	||	Unmodulated	0.229583
chr1:54397335	chr1	54397335	-	UTR	||	Gtf3c3	||	5	3	3	||	0.206481	0	0.206481	||	4	9	0.444444	|	5	40	0.125	|	1	20	0.05	||	0	5	0	|	0	28	0	|	0	15	0	||	Unmodulated	0.229875
chr7:127526736	chr7	127526736	+	Exon	||	Gm42715;Srcap	||	17	3	3	||	0.185312	0.0392157	0.146096	||	9	26	0.346154	|	2	42	0.047619	|	6	37	0.162162	||	2	17	0.117647	|	0	19	0	|	0	34	0	||	Unmodulated	0.230058
chr6:83980330	chr6	83980330	+	Intron	||	Zfp638	||	8	3	3	||	0.135965	0.0123457	0.123619	||	2	8	0.25	|	0	38	0	|	3	19	0.157895	||	0	10	0	|	1	27	0.037037	|	0	18	0	||	Unmodulated	0.230169
chr2:5869183	chr2	5869183	+	UTR	||	Nudt5	||	21	3	3	||	0.0234488	0	0.0234488	||	1	21	0.047619	|	1	44	0.0227273	|	0	32	0	||	0	38	0	|	0	22	0	|	0	32	0	||	Unmodulated	0.23027
chr4:140951582	chr4	140951582	+	UTR	||	Gm13031;Padi2	||	6	3	3	||	0.41164	0.025641	0.385999	||	6	7	0.857143	|	4	15	0.266667	|	1	9	0.111111	||	0	6	0	|	1	13	0.0769231	|	0	10	0	||	Unmodulated	0.230377
chr4:155621909	chr4	155621909	+	UTR	||	Gm10563;Gm16023;Slc35e2	||	25	3	3	||	0.0662393	0	0.0662393	||	0	25	0	|	7	52	0.134615	|	5	78	0.0641026	||	0	43	0	|	0	88	0	|	0	89	0	||	Unmodulated	0.230511
chr13:62144924	chr13	62144924	+	Intron	||	Zfp808	||	8	3	3	||	0.0768254	0	0.0768254	||	2	12	0.166667	|	1	25	0.04	|	1	42	0.0238095	||	0	8	0	|	0	10	0	|	0	13	0	||	Unmodulated	0.231037
chr15:67103550	chr15	67103550	-	UTR	||	St3gal1	||	15	3	3	||	0.0363873	0	0.0363873	||	2	27	0.0740741	|	2	57	0.0350877	|	0	38	0	||	0	15	0	|	0	17	0	|	0	42	0	||	Unmodulated	0.231071
chr18:23964980	chr18	23964980	+	intergenic	||	NA	||	5	3	3	||	0.0612745	0	0.0612745	||	0	5	0	|	2	34	0.0588235	|	2	16	0.125	||	0	8	0	|	0	12	0	|	0	12	0	||	Unmodulated	0.231769
chr2:181517839	chr2	181517839	+	UTR	||	Tpd52l2	||	5	3	3	||	0.0612745	0	0.0612745	||	0	7	0	|	1	17	0.0588235	|	1	8	0.125	||	0	10	0	|	0	5	0	|	0	14	0	||	Unmodulated	0.231769
chr9:22242803	chr9	22242803	+	Intron	||	Zfp809	||	5	3	3	||	0.0612745	0	0.0612745	||	1	8	0.125	|	2	34	0.0588235	|	0	12	0	||	0	16	0	|	0	7	0	|	0	5	0	||	Unmodulated	0.231769
chr7:55977620	chr7	55977620	-	UTR	||	A230056P14Rik;Nipa1	||	19	3	3	||	0.164862	0	0.164862	||	2	19	0.105263	|	11	31	0.354839	|	1	29	0.0344828	||	0	24	0	|	0	38	0	|	0	60	0	||	Unmodulated	0.23183
chr2:120737001	chr2	120737001	-	UTR	||	Cdan1;Ttbk2	||	10	3	3	||	0.131834	0	0.131834	||	4	14	0.285714	|	1	28	0.0357143	|	2	27	0.0740741	||	0	10	0	|	0	19	0	|	0	26	0	||	Unmodulated	0.231976
chr10:20315800	chr10	20315800	+	Intron	||	Bclaf1	||	9	3	3	||	0.00833333	0.0478313	-0.039498	||	0	9	0	|	0	51	0	|	1	40	0.025	||	2	21	0.0952381	|	1	40	0.025	|	1	43	0.0232558	||	Unmodulated	0.232163
chr15:81456896	chr15	81456896	+	intergenic	||	NA	||	4	3	2	||	0.224206	0	0.224206	||	3	14	0.214286	|	11	24	0.458333	|	0	8	0	||	0	13	0	|	0	4	0	|	0	10	0	||	Unmodulated	0.232464
chr11:107067022	chr11	107067022	-	Intron	||	Bptf	||	9	3	3	||	0.704875	0.425926	0.278949	||	7	11	0.636364	|	44	44	1	|	11	23	0.478261	||	3	9	0.333333	|	5	18	0.277778	|	12	18	0.666667	||	Unmodulated	0.232467
chr11:118233649	chr11	118233649	-	Intron	||	Cyth1	||	4	3	2	||	0.0766408	0	0.0766408	||	2	12	0.166667	|	1	43	0.0232558	|	1	25	0.04	||	0	4	0	|	0	10	0	|	0	13	0	||	Unmodulated	0.23255
chr19:10591251	chr19	10591251	+	intergenic	||	NA	||	1	3	2	||	0.0698413	0	0.0698413	||	0	7	0	|	1	15	0.0666667	|	2	14	0.142857	||	0	1	0	|	0	6	0	|	0	7	0	||	Unmodulated	0.232662
chr2:150913731	chr2	150913731	+	Intron	||	Gins1	||	6	3	3	||	0.230719	0	0.230719	||	3	6	0.5	|	1	17	0.0588235	|	2	15	0.133333	||	0	8	0	|	0	17	0	|	0	35	0	||	Unmodulated	0.232694
chr2:132309855	chr2	132309855	+	UTR	||	Cds2	||	15	3	3	||	0.0542784	0	0.0542784	||	0	19	0	|	3	58	0.0517241	|	4	36	0.111111	||	0	15	0	|	0	29	0	|	0	46	0	||	Unmodulated	0.232926
chr15:82233010	chr15	82233010	-	intergenic	||	NA	||	3	3	2	||	0.0750916	0	0.0750916	||	0	14	0	|	1	14	0.0714286	|	2	13	0.153846	||	0	3	0	|	0	7	0	|	0	13	0	||	Unmodulated	0.233209
chr12:32829517	chr12	32829517	+	Intron	||	Nampt	||	3	2	2	||	0.611111	0.944444	-0.333333	||	1	3	0.333333	|	6	12	0.5	|	9	9	1	||	10	12	0.833333	|	3	3	1	|	9	9	1	||	Unmodulated	0.233464
chr11:103125826	chr11	103125826	-	intergenic	||	NA	||	3	2	3	||	0.0208333	0.161905	-0.141071	||	0	3	0	|	1	16	0.0625	|	0	8	0	||	1	5	0.2	|	0	19	0	|	2	7	0.285714	||	Unmodulated	0.233605
chr7:141488946	chr7	141488946	+	Intron	||	Tspan4	||	4	3	2	||	0.220635	0.0416667	0.178968	||	2	12	0.166667	|	1	15	0.0666667	|	3	7	0.428571	||	0	4	0	|	2	16	0.125	|	0	12	0	||	Unmodulated	0.233668
chr2:71231006	chr2	71231006	+	Intron	||	Dync1i2	||	4	2	3	||	0	0.162393	-0.162393	||	0	4	0	|	0	13	0	|	0	6	0	||	2	6	0.333333	|	2	13	0.153846	|	0	5	0	||	Unmodulated	0.233846
chr2:14148681	chr2	14148681	+	UTR	||	Stam	||	3	3	2	||	0.324786	0	0.324786	||	0	6	0	|	4	13	0.307692	|	8	12	0.666667	||	0	3	0	|	0	15	0	|	0	22	0	||	Unmodulated	0.233846
chr1:179529835	chr1	179529835	-	Intron	||	Tfb2m	||	3	2	3	||	0	0.0811966	-0.0811966	||	0	3	0	|	0	11	0	|	0	11	0	||	0	8	0	|	1	6	0.166667	|	1	13	0.0769231	||	Unmodulated	0.233846
chr6:56731376	chr6	56731376	+	Intron	||	Avl9	||	6	3	3	||	0	0.0811966	-0.0811966	||	0	9	0	|	0	16	0	|	0	18	0	||	1	6	0.166667	|	1	13	0.0769231	|	0	6	0	||	Unmodulated	0.233846
chr4:123373967	chr4	123373967	-	Intron	||	Macf1	||	3	3	2	||	0.0811966	0	0.0811966	||	1	13	0.0769231	|	0	8	0	|	1	6	0.166667	||	0	9	0	|	0	8	0	|	0	3	0	||	Unmodulated	0.233846
chr10:63252627	chr10	63252627	+	Intron	||	Herc4	||	5	3	3	||	0.0811966	0	0.0811966	||	1	6	0.166667	|	0	6	0	|	1	13	0.0769231	||	0	5	0	|	0	18	0	|	0	19	0	||	Unmodulated	0.233846
chr10:63264738	chr10	63264738	+	Intron	||	Herc4	||	6	3	3	||	0.0811966	0	0.0811966	||	1	6	0.166667	|	1	13	0.0769231	|	0	9	0	||	0	11	0	|	0	17	0	|	0	9	0	||	Unmodulated	0.233846
chr6:47872345	chr6	47872345	+	intergenic	||	Zfp398	||	3	3	2	||	0.0811966	0	0.0811966	||	1	6	0.166667	|	2	26	0.0769231	|	0	12	0	||	0	3	0	|	0	31	0	|	0	11	0	||	Unmodulated	0.233846
chr12:59058695	chr12	59058695	-	Intron	||	Trappc6b	||	7	3	3	||	0.025641	0.169312	-0.143671	||	0	7	0	|	1	13	0.0769231	|	0	13	0	||	2	7	0.285714	|	2	9	0.222222	|	0	9	0	||	Unmodulated	0.234239
chr16:32989154	chr16	32989154	+	Intron	||	Gm17106;Lrch3	||	9	3	3	||	0.0166667	0.318519	-0.301852	||	1	20	0.05	|	0	34	0	|	0	14	0	||	12	18	0.666667	|	1	15	0.0666667	|	2	9	0.222222	||	Unmodulated	0.23441
chr11:101198300	chr11	101198300	-	UTR	||	Ezh1	||	10	3	3	||	0.0589226	0	0.0589226	||	1	18	0.0555556	|	4	33	0.121212	|	0	24	0	||	0	10	0	|	0	13	0	|	0	22	0	||	Unmodulated	0.234595
chr7:98624684	chr7	98624684	-	Intron	||	Emsy	||	9	3	3	||	0.132576	0	0.132576	||	3	11	0.272727	|	3	24	0.125	|	0	18	0	||	0	9	0	|	0	16	0	|	0	26	0	||	Unmodulated	0.234595
chr11:79998273	chr11	79998273	+	Intron	||	Suz12	||	10	3	3	||	0.0708333	0	0.0708333	||	0	10	0	|	7	48	0.145833	|	2	30	0.0666667	||	0	14	0	|	0	37	0	|	0	46	0	||	Unmodulated	0.234876
chr2:181436639	chr2	181436639	-	Intron	||	Zbtb46	||	1	2	2	||	0.3	0.047619	0.252381	||	1	2	0.5	|	2	5	0.4	|	0	5	0	||	0	1	0	|	0	6	0	|	1	7	0.142857	||	Unmodulated	0.235338
chr10:78186346	chr10	78186346	-	intergenic	||	NA	||	6	3	3	||	0.0969697	0	0.0969697	||	2	10	0.2	|	1	11	0.0909091	|	0	7	0	||	0	6	0	|	0	16	0	|	0	18	0	||	Unmodulated	0.23549
chr7:59234159	chr7	59234159	+	Intron	||	9330162G02Rik;Ube3a	||	2	3	2	||	0.0969697	0	0.0969697	||	1	5	0.2	|	1	11	0.0909091	|	0	8	0	||	0	2	0	|	0	15	0	|	0	5	0	||	Unmodulated	0.23549
chr4:83463945	chr4	83463945	+	Intron	||	Psip1;Snapc3	||	13	3	3	||	0.00757576	0.0446429	-0.0370671	||	0	13	0	|	0	49	0	|	1	44	0.0227273	||	2	28	0.0714286	|	2	32	0.0625	|	0	24	0	||	Unmodulated	0.235617
chr15:66639536	chr15	66639536	+	Intron	||	Phf20l1	||	12	3	3	||	0.0534188	0.00925926	0.0441595	||	1	12	0.0833333	|	3	39	0.0769231	|	0	24	0	||	0	19	0	|	1	36	0.0277778	|	0	35	0	||	Unmodulated	0.235618
chr5:115086614	chr5	115086614	+	Intron	||	Sppl3	||	6	3	3	||	0.010101	0.111842	-0.101741	||	0	6	0	|	1	33	0.030303	|	0	13	0	||	1	8	0.125	|	0	11	0	|	4	19	0.210526	||	Unmodulated	0.235852
chr17:22286590	chr17	22286590	-	intergenic	||	NA	||	7	3	3	||	0.234432	0.421413	-0.186981	||	4	14	0.285714	|	9	26	0.346154	|	1	14	0.0714286	||	4	7	0.571429	|	4	18	0.222222	|	8	17	0.470588	||	Unmodulated	0.23588
chr13:55626651	chr13	55626651	+	Intron	||	Caml	||	5	3	3	||	0.301852	0.0809524	0.220899	||	2	8	0.25	|	2	20	0.1	|	5	9	0.555556	||	2	14	0.142857	|	1	10	0.1	|	0	5	0	||	Unmodulated	0.236153
chr11:3319028	chr11	3319028	+	Intron	||	Gm11944;Gm12592	||	0	2	2	||	0.0691244	0	0.0691244	||	1	7	0.142857	|	2	31	0.0645161	|	0	3	0	||	0	0	NA	|	0	9	0	|	0	10	0	||	Unmodulated	0.23619
chr10:62743678	chr10	62743678	-	intergenic	||	NA	||	1	2	2	||	0.455556	0	0.455556	||	1	1	1	|	4	20	0.2	|	1	6	0.166667	||	0	2	0	|	0	14	0	|	0	7	0	||	Unmodulated	0.236408
chr2:23032622	chr2	23032622	-	Intron	||	Abi1	||	5	3	3	||	0.0467508	0	0.0467508	||	0	5	0	|	2	46	0.0434783	|	3	31	0.0967742	||	0	5	0	|	0	22	0	|	0	31	0	||	Unmodulated	0.236752
chr10:58419092	chr10	58419092	+	Intron	||	Lims1	||	6	3	3	||	0.359649	0.219846	0.139804	||	3	6	0.5	|	5	19	0.263158	|	6	19	0.315789	||	2	6	0.333333	|	1	11	0.0909091	|	4	17	0.235294	||	Unmodulated	0.236845
chr17:33688375	chr17	33688375	-	Intron	||	2002-03-01	||	27	3	3	||	0.0381373	0.00653595	0.0316013	||	1	34	0.0294118	|	1	100	0.01	|	6	80	0.075	||	0	27	0	|	2	102	0.0196078	|	0	118	0	||	Unmodulated	0.237532
chr2:121492903	chr2	121492903	-	UTR	||	Mfap1a	||	5	3	3	||	0.36431	0	0.36431	||	4	5	0.8	|	3	27	0.111111	|	2	11	0.181818	||	0	25	0	|	0	37	0	|	0	21	0	||	Unmodulated	0.237819
chr13:21390018	chr13	21390018	-	UTR	||	Zkscan3	||	6	3	3	||	0.0413059	0	0.0413059	||	1	11	0.0909091	|	1	66	0.0151515	|	1	56	0.0178571	||	0	6	0	|	0	29	0	|	0	15	0	||	Unmodulated	0.237898
chr11:23375423	chr11	23375423	+	Intron	||	Usp34	||	13	3	3	||	0	0.12037	-0.12037	||	0	13	0	|	0	22	0	|	0	21	0	||	4	16	0.25	|	2	18	0.111111	|	0	18	0	||	Unmodulated	0.237927
chr18:24234146	chr18	24234146	+	Intron	||	Galnt1	||	5	3	3	||	0	0.12037	-0.12037	||	0	5	0	|	0	40	0	|	0	17	0	||	2	8	0.25	|	2	18	0.111111	|	0	18	0	||	Unmodulated	0.237927
chr15:34925334	chr15	34925334	-	Intron	||	Stk3	||	1	2	2	||	0.240741	0	0.240741	||	2	4	0.5	|	2	9	0.222222	|	0	5	0	||	0	1	0	|	0	7	0	|	0	10	0	||	Unmodulated	0.237927
chr17:14967947	chr17	14967947	+	Intron	||	Gm3448	||	2	2	2	||	0.361111	0	0.361111	||	0	5	0	|	3	4	0.75	|	2	6	0.333333	||	0	2	0	|	0	11	0	|	0	13	0	||	Unmodulated	0.237927
chr4:126168472	chr4	126168472	-	Intron	||	Thrap3	||	6	3	3	||	0.0802469	0	0.0802469	||	0	6	0	|	2	27	0.0740741	|	1	6	0.166667	||	0	11	0	|	0	20	0	|	0	12	0	||	Unmodulated	0.237927
chr13:100699915	chr13	100699915	-	UTR	||	NA	||	2	2	2	||	0.12037	0	0.12037	||	1	4	0.25	|	0	14	0	|	1	9	0.111111	||	0	2	0	|	0	8	0	|	0	12	0	||	Unmodulated	0.237927
chr6:32865683	chr6	32865683	-	Intron	||	Chchd3	||	4	2	3	||	0.12037	0	0.12037	||	1	4	0.25	|	0	16	0	|	1	9	0.111111	||	0	6	0	|	0	8	0	|	0	9	0	||	Unmodulated	0.237927
chr4:125104295	chr4	125104295	+	Intron	||	Meaf6	||	4	2	2	||	0.240741	0	0.240741	||	2	4	0.5	|	0	15	0	|	2	9	0.222222	||	0	6	0	|	0	4	0	|	0	8	0	||	Unmodulated	0.237927
chr5:33833182	chr5	33833182	+	Intron	||	Nsd2	||	5	3	3	||	0.0694444	0.00900901	0.0604354	||	2	16	0.125	|	0	41	0	|	2	24	0.0833333	||	0	5	0	|	0	35	0	|	1	37	0.027027	||	Unmodulated	0.238013
chr2:167440280	chr2	167440280	+	Intron	||	Slc9a8	||	1	2	2	||	0.0972222	0.0151515	0.0820707	||	0	3	0	|	1	6	0.166667	|	1	8	0.125	||	0	1	0	|	0	16	0	|	1	22	0.0454545	||	Unmodulated	0.238207
chr15:81819284	chr15	81819284	+	Intron	||	Tef	||	3	3	2	||	0.150794	0.492308	-0.341514	||	2	7	0.285714	|	2	12	0.166667	|	0	7	0	||	2	3	0.666667	|	1	13	0.0769231	|	11	15	0.733333	||	Unmodulated	0.23826
chr13:9367942	chr13	9367942	+	Intron	||	Dip2c	||	2	3	2	||	0.166667	0.030303	0.136364	||	2	8	0.25	|	2	8	0.25	|	0	7	0	||	1	11	0.0909091	|	0	13	0	|	0	2	0	||	Unmodulated	0.238307
chr9:70700789	chr9	70700789	+	Intron	||	Adam10	||	42	3	3	||	0.175445	0	0.175445	||	17	44	0.386364	|	5	63	0.0793651	|	6	99	0.0606061	||	0	42	0	|	0	59	0	|	0	118	0	||	Unmodulated	0.238511
chr4:129320138	chr4	129320138	-	Intron	||	Rbbp4	||	15	3	3	||	0.33878	0.195088	0.143692	||	5	17	0.294118	|	26	60	0.433333	|	13	45	0.288889	||	5	15	0.333333	|	8	37	0.216216	|	2	56	0.0357143	||	Unmodulated	0.238518
chr11:106912099	chr11	106912099	-	Intron	||	Smurf2	||	5	3	3	||	0.0640523	0	0.0640523	||	0	5	0	|	1	17	0.0588235	|	2	15	0.133333	||	0	10	0	|	0	19	0	|	0	14	0	||	Unmodulated	0.23873
chrX:60375489	chrX	60375489	-	Intron	||	Atp11c	||	8	3	3	||	0.0320261	0	0.0320261	||	0	8	0	|	1	34	0.0294118	|	1	15	0.0666667	||	0	8	0	|	0	8	0	|	0	16	0	||	Unmodulated	0.23873
chr2:132309634	chr2	132309634	+	UTR	||	Cds2	||	9	3	3	||	0.0427015	0	0.0427015	||	0	15	0	|	2	51	0.0392157	|	4	45	0.0888889	||	0	9	0	|	0	39	0	|	0	61	0	||	Unmodulated	0.23873
chr6:30242920	chr6	30242920	-	Intron	||	Ube2h	||	20	3	3	||	0.0223164	0.0586799	-0.0363635	||	1	20	0.05	|	0	53	0	|	1	59	0.0169492	||	2	21	0.0952381	|	4	68	0.0588235	|	2	91	0.021978	||	Unmodulated	0.238878
chr7:29223079	chr7	29223079	-	UTR	||	Kcnk6	||	11	3	3	||	0.0436364	0	0.0436364	||	1	25	0.04	|	1	11	0.0909091	|	0	13	0	||	0	23	0	|	0	19	0	|	0	11	0	||	Unmodulated	0.239021
chr3:51458202	chr3	51458202	+	Intron	||	Naa15	||	11	3	3	||	0.124523	0	0.124523	||	3	11	0.272727	|	1	34	0.0294118	|	2	28	0.0714286	||	0	25	0	|	0	67	0	|	0	42	0	||	Unmodulated	0.239108
chr11:4478724	chr11	4478724	-	intergenic	||	NA	||	9	3	3	||	0.0342262	0	0.0342262	||	0	9	0	|	1	32	0.03125	|	1	14	0.0714286	||	0	11	0	|	0	26	0	|	0	38	0	||	Unmodulated	0.239643
chr12:69589552	chr12	69589552	-	Intron	||	Sos2	||	3	3	2	||	0.0684524	0	0.0684524	||	1	7	0.142857	|	1	16	0.0625	|	0	11	0	||	0	3	0	|	0	23	0	|	0	10	0	||	Unmodulated	0.239643
chr2:37425939	chr2	37425939	-	UTR	||	Zbtb6	||	26	3	3	||	0.0756201	0	0.0756201	||	6	38	0.157895	|	0	26	0	|	2	29	0.0689655	||	0	26	0	|	0	62	0	|	0	38	0	||	Unmodulated	0.239823
chr1:86345916	chr1	86345916	-	UTR	||	Ncl	||	11	3	3	||	0.0844646	0	0.0844646	||	1	13	0.0769231	|	3	17	0.176471	|	0	23	0	||	0	11	0	|	0	45	0	|	0	31	0	||	Unmodulated	0.240045
chr16:11115310	chr16	11115310	-	UTR	||	Txndc11	||	0	2	2	||	0.159664	0.0606061	0.0990578	||	0	0	NA	|	6	34	0.176471	|	2	14	0.142857	||	0	2	0	|	2	11	0.181818	|	0	8	0	||	Unmodulated	0.240148
chr2:120602236	chr2	120602236	+	intergenic	||	NA	||	15	3	3	||	0.0956522	0	0.0956522	||	3	15	0.2	|	0	29	0	|	2	23	0.0869565	||	0	20	0	|	0	32	0	|	0	30	0	||	Unmodulated	0.240325
chr6:30407168	chr6	30407168	+	Intron	||	Klhdc10	||	8	3	3	||	0.113223	0	0.113223	||	2	8	0.25	|	1	27	0.037037	|	1	19	0.0526316	||	0	13	0	|	0	28	0	|	0	36	0	||	Unmodulated	0.240336
chr12:85065623	chr12	85065623	+	Intron	||	Ylpm1	||	8	3	3	||	0.348273	0.0833333	0.264939	||	6	9	0.666667	|	4	28	0.142857	|	4	17	0.235294	||	2	8	0.25	|	0	17	0	|	0	16	0	||	Unmodulated	0.240934
chr12:101921631	chr12	101921631	-	UTR	||	Atxn3	||	23	3	3	||	0.100306	0	0.100306	||	7	32	0.21875	|	1	59	0.0169492	|	3	46	0.0652174	||	0	23	0	|	0	84	0	|	0	59	0	||	Unmodulated	0.240982
chr11:77595243	chr11	77595243	-	Intron	||	Taok1	||	5	3	3	||	0.0502392	0	0.0502392	||	0	5	0	|	1	22	0.0454545	|	2	19	0.105263	||	0	8	0	|	0	16	0	|	0	27	0	||	Unmodulated	0.241074
chr8:129219172	chr8	129219172	-	Exon	||	2610044O15Rik8	||	10	3	3	||	0.0989011	0.0185185	0.0803826	||	2	13	0.153846	|	3	21	0.142857	|	0	14	0	||	1	18	0.0555556	|	0	10	0	|	0	14	0	||	Unmodulated	0.241365
chr11:23455999	chr11	23455999	+	UTR	||	Usp34	||	8	3	3	||	0	0.0529101	-0.0529101	||	0	8	0	|	0	25	0	|	0	19	0	||	1	9	0.111111	|	1	21	0.047619	|	0	19	0	||	Unmodulated	0.241902
chr16:43636992	chr16	43636992	+	UTR	||	Zbtb20	||	4	2	3	||	0.15873	0	0.15873	||	2	6	0.333333	|	0	4	0	|	1	7	0.142857	||	0	11	0	|	0	7	0	|	0	7	0	||	Unmodulated	0.241902
chr7:113532621	chr7	113532621	+	Intron	||	Far1;Far1os	||	3	2	2	||	0.15873	0	0.15873	||	1	3	0.333333	|	0	19	0	|	3	21	0.142857	||	0	3	0	|	0	12	0	|	0	17	0	||	Unmodulated	0.241902
chr9:88445981	chr9	88445981	-	Intron	||	Gm20537	||	4	3	2	||	0.0793651	0	0.0793651	||	1	6	0.166667	|	1	14	0.0714286	|	0	7	0	||	0	4	0	|	0	21	0	|	0	16	0	||	Unmodulated	0.241902
chr9:72727448	chr9	72727448	+	Intron	||	Nedd4	||	14	3	3	||	0.0107527	0.0648148	-0.0540621	||	0	14	0	|	1	31	0.0322581	|	0	20	0	||	2	24	0.0833333	|	2	18	0.111111	|	0	18	0	||	Unmodulated	0.242101
chr6:66540211	chr6	66540211	+	UTR	||	Mad2l1	||	20	3	3	||	0.0241955	0	0.0241955	||	3	59	0.0508475	|	0	89	0	|	1	46	0.0217391	||	0	49	0	|	0	20	0	|	0	61	0	||	Unmodulated	0.242168
chr1:59874208	chr1	59874208	+	UTR	||	Bmpr2	||	6	3	3	||	0.0916667	0.0166667	0.075	||	2	16	0.125	|	0	11	0	|	3	20	0.15	||	0	6	0	|	1	20	0.05	|	0	22	0	||	Unmodulated	0.242575
chr18:65478448	chr18	65478448	+	UTR	||	Malt1	||	14	3	3	||	0.101732	0	0.101732	||	3	14	0.214286	|	0	31	0	|	2	22	0.0909091	||	0	16	0	|	0	16	0	|	0	21	0	||	Unmodulated	0.243018
chr16:97857208	chr16	97857208	-	UTR	||	C2cd2	||	6	3	3	||	0.203463	0	0.203463	||	2	11	0.181818	|	0	6	0	|	3	7	0.428571	||	0	6	0	|	0	6	0	|	0	7	0	||	Unmodulated	0.243018
chr17:35247741	chr17	35247741	+	Intron	||	Ddx39b	||	7	3	3	||	0.0748538	0	0.0748538	||	0	7	0	|	2	30	0.0666667	|	3	19	0.157895	||	0	7	0	|	0	23	0	|	0	22	0	||	Unmodulated	0.243543
chr8:116697778	chr8	116697778	-	Intron	||	Cdyl2	||	2	3	2	||	0.0208333	0.177778	-0.156944	||	0	5	0	|	0	5	0	|	1	16	0.0625	||	0	2	0	|	1	5	0.2	|	3	9	0.333333	||	Unmodulated	0.243628
chr8:70014059	chr8	70014059	-	intergenic	||	NA	||	21	3	3	||	0.0845154	0.004329	0.0801864	||	0	21	0	|	8	47	0.170213	|	6	72	0.0833333	||	0	34	0	|	1	77	0.012987	|	0	61	0	||	Unmodulated	0.243683
chr15:80725531	chr15	80725531	+	Intron	||	Tnrc6b	||	1	2	2	||	0.333333	0.0196078	0.313725	||	2	3	0.666667	|	6	18	0.333333	|	0	8	0	||	0	1	0	|	1	17	0.0588235	|	0	8	0	||	Unmodulated	0.24381
chr5:150640816	chr5	150640816	-	UTR	||	N4bp2l2	||	14	3	3	||	0.155423	0.0392157	0.116208	||	4	14	0.285714	|	5	36	0.138889	|	1	24	0.0416667	||	2	17	0.117647	|	0	43	0	|	0	33	0	||	Unmodulated	0.243822
chr18:24234128	chr18	24234128	+	Intron	||	Galnt1	||	3	2	3	||	0	0.118421	-0.118421	||	0	3	0	|	0	42	0	|	0	19	0	||	2	8	0.25	|	2	19	0.105263	|	0	21	0	||	Unmodulated	0.243849
chr19:16158683	chr19	16158683	+	Intron	||	Gnaq	||	4	2	3	||	0.118421	0	0.118421	||	1	4	0.25	|	0	18	0	|	2	19	0.105263	||	0	5	0	|	0	11	0	|	0	5	0	||	Unmodulated	0.243849
chr19:40742497	chr19	40742497	+	intergenic	||	NA	||	4	2	2	||	0.118421	0	0.118421	||	1	4	0.25	|	2	19	0.105263	|	0	9	0	||	0	11	0	|	0	9	0	|	0	4	0	||	Unmodulated	0.243849
chr5:33833177	chr5	33833177	+	Intron	||	Nsd2	||	4	3	2	||	0.0835149	0	0.0835149	||	3	17	0.176471	|	0	41	0	|	2	27	0.0740741	||	0	4	0	|	0	34	0	|	0	37	0	||	Unmodulated	0.244189
chr18:35802738	chr18	35802738	+	Intron	||	Ube2d2a	||	5	3	3	||	0.0901515	0	0.0901515	||	1	5	0.2	|	1	40	0.025	|	1	22	0.0454545	||	0	9	0	|	0	34	0	|	0	28	0	||	Unmodulated	0.244273
chr15:53278268	chr15	53278268	-	Intron	||	Ext1	||	10	3	3	||	0.0727874	0	0.0727874	||	2	13	0.153846	|	0	44	0	|	2	31	0.0645161	||	0	16	0	|	0	13	0	|	0	10	0	||	Unmodulated	0.244294
chr3:116681919	chr3	116681919	-	Intron	||	Slc35a3	||	4	2	3	||	0.22549	0	0.22549	||	2	4	0.5	|	2	17	0.117647	|	1	17	0.0588235	||	0	5	0	|	0	13	0	|	0	16	0	||	Unmodulated	0.244581
chr6:146580147	chr6	146580147	+	Intron	||	Fgfr1op2	||	3	2	2	||	0.106838	0.0208333	0.0860043	||	1	6	0.166667	|	2	13	0.153846	|	0	3	0	||	0	3	0	|	1	16	0.0625	|	0	7	0	||	Unmodulated	0.244971
chr3:116676861	chr3	116676861	-	Intron	||	Gm43191;Slc35a3	||	0	3	2	||	0.0472222	0	0.0472222	||	1	10	0.1	|	1	24	0.0416667	|	0	19	0	||	0	0	NA	|	0	24	0	|	0	25	0	||	Unmodulated	0.245003
chr9:65906602	chr9	65906602	+	Intron	||	Trip4	||	1	2	2	||	0.0809524	0	0.0809524	||	0	1	0	|	1	14	0.0714286	|	6	35	0.171429	||	0	2	0	|	0	32	0	|	0	45	0	||	Unmodulated	0.245003
chr2:154587098	chr2	154587098	-	UTR	||	Pxmp4	||	5	3	3	||	0.188889	0	0.188889	||	1	6	0.166667	|	0	7	0	|	2	5	0.4	||	0	6	0	|	0	6	0	|	0	11	0	||	Unmodulated	0.245003
chr8:111004791	chr8	111004791	-	UTR	||	Ddx19b	||	5	3	3	||	0.188889	0	0.188889	||	4	10	0.4	|	2	12	0.166667	|	0	5	0	||	0	12	0	|	0	26	0	|	0	14	0	||	Unmodulated	0.245003
chrX:162766102	chrX	162766102	+	Intron	||	Rbbp7	||	2	2	2	||	0	0.0944444	-0.0944444	||	0	2	0	|	0	12	0	|	0	13	0	||	0	2	0	|	1	12	0.0833333	|	1	5	0.2	||	Unmodulated	0.245003
chr15:6598969	chr15	6598969	+	Intron	||	Fyb	||	1	2	2	||	0.0416667	0.277778	-0.236111	||	0	1	0	|	0	5	0	|	1	8	0.125	||	2	4	0.5	|	0	6	0	|	2	6	0.333333	||	Unmodulated	0.245315
chr18:76268145	chr18	76268145	+	Intron	||	Smad2	||	4	3	2	||	0.039272	0	0.039272	||	1	12	0.0833333	|	1	29	0.0344828	|	0	16	0	||	0	4	0	|	0	11	0	|	0	11	0	||	Unmodulated	0.245768
chr7:127526668	chr7	127526668	+	Exon	||	Gm42715;Srcap	||	11	3	3	||	0.160714	0	0.160714	||	5	14	0.357143	|	1	24	0.0416667	|	1	12	0.0833333	||	0	11	0	|	0	16	0	|	0	16	0	||	Unmodulated	0.245818
chr5:77407731	chr5	77407731	-	Exon	||	Igfbp7	||	16	3	3	||	0.956435	0.901915	0.0545206	||	76	81	0.938272	|	23	23	1	|	27	29	0.931034	||	89	103	0.864078	|	29	30	0.966667	|	14	16	0.875	||	Unmodulated	0.246139
chr2:131283588	chr2	131283588	+	Intron	||	Pank2	||	5	3	3	||	0.0672269	0	0.0672269	||	1	7	0.142857	|	0	24	0	|	1	17	0.0588235	||	0	5	0	|	0	12	0	|	0	8	0	||	Unmodulated	0.246311
chr5:34387990	chr5	34387990	+	Intron	||	Fam193a	||	3	2	2	||	0.0666667	0.0133333	0.0533333	||	0	3	0	|	2	20	0.1	|	1	10	0.1	||	0	3	0	|	1	25	0.04	|	0	7	0	||	Unmodulated	0.246461
chr11:23347132	chr11	23347132	+	Intron	||	Usp34	||	10	3	3	||	0.0626263	0	0.0626263	||	2	15	0.133333	|	0	56	0	|	3	55	0.0545455	||	0	10	0	|	0	41	0	|	0	56	0	||	Unmodulated	0.247031
chrX:105845326	chrX	105845326	-	Intron	||	Atrx	||	4	2	3	||	0	0.104377	-0.104377	||	0	4	0	|	0	15	0	|	0	16	0	||	2	9	0.222222	|	0	21	0	|	1	11	0.0909091	||	Unmodulated	0.247031
chr17:30393281	chr17	30393281	-	Intron	||	Btbd9	||	2	2	2	||	0.447619	0	0.447619	||	2	2	1	|	3	15	0.2	|	2	14	0.142857	||	0	3	0	|	0	5	0	|	0	7	0	||	Unmodulated	0.247108
chr14:86677762	chr14	86677762	-	Intron	||	Diaph3	||	0	3	2	||	0.3	0	0.3	||	4	6	0.666667	|	1	15	0.0666667	|	2	12	0.166667	||	0	0	NA	|	0	7	0	|	0	21	0	||	Unmodulated	0.247382
chr14:31700665	chr14	31700665	-	UTR	||	Ankrd28	||	53	3	3	||	0.222658	0.0912119	0.131446	||	20	55	0.363636	|	6	77	0.0779221	|	12	53	0.226415	||	10	72	0.138889	|	6	68	0.0882353	|	4	86	0.0465116	||	Unmodulated	0.247726
chr5:113087835	chr5	113087835	-	UTR	||	2900026A02Rik	||	2	2	2	||	0.0550887	0	0.0550887	||	0	2	0	|	2	17	0.117647	|	1	21	0.047619	||	0	5	0	|	0	5	0	|	0	2	0	||	Unmodulated	0.248209
chr13:109064924	chr13	109064924	+	Intron	||	Pde4d	||	0	2	3	||	0.283333	0	0.283333	||	0	0	NA	|	2	5	0.4	|	1	6	0.166667	||	0	10	0	|	0	9	0	|	0	13	0	||	Unmodulated	0.248668
chr13:55225015	chr13	55225015	+	Intron	||	Nsd1	||	6	3	3	||	0.167328	0	0.167328	||	3	8	0.375	|	2	36	0.0555556	|	2	28	0.0714286	||	0	6	0	|	0	38	0	|	0	9	0	||	Unmodulated	0.248709
chr17:32269577	chr17	32269577	-	Intron	||	Brd4	||	7	3	3	||	0.00775194	0.0679012	-0.0601493	||	0	12	0	|	0	46	0	|	1	43	0.0232558	||	1	7	0.142857	|	1	27	0.037037	|	1	42	0.0238095	||	Unmodulated	0.248743
chr17:12972241	chr17	12972241	-	Intron	||	Wtap	||	21	3	3	||	0.015873	0.0411164	-0.0252434	||	1	21	0.047619	|	0	72	0	|	0	58	0	||	1	27	0.037037	|	1	31	0.0322581	|	2	37	0.0540541	||	Unmodulated	0.248909
chr13:109376075	chr13	109376075	+	Intron	||	Pde4d	||	1	2	2	||	0	0.466667	-0.466667	||	NA	NA	NA	|	0	6	0	|	0	5	0	||	1	1	1	|	0	6	0	|	2	5	0.4	||	Unmodulated	0.249521
chr3:108115674	chr3	108115674	-	Intron	||	Gnai3	||	3	2	3	||	0	0.116667	-0.116667	||	0	3	0	|	0	18	0	|	0	8	0	||	2	8	0.25	|	1	10	0.1	|	0	11	0	||	Unmodulated	0.249521
chr11:85721685	chr11	85721685	+	Intron	||	Bcas3	||	4	3	2	||	0	0.116667	-0.116667	||	0	9	0	|	0	11	0	|	0	29	0	||	1	4	0.25	|	1	10	0.1	|	0	28	0	||	Unmodulated	0.249521
chr16:33476537	chr16	33476537	+	Intron	||	Zfp148	||	3	2	2	||	0	0.116667	-0.116667	||	0	3	0	|	0	24	0	|	0	13	0	||	1	4	0.25	|	0	14	0	|	2	20	0.1	||	Unmodulated	0.249521
chr9:111201875	chr9	111201875	+	Intron	||	Lrrfip2	||	2	2	2	||	0	0.116667	-0.116667	||	0	7	0	|	0	15	0	|	0	2	0	||	1	4	0.25	|	2	20	0.1	|	0	5	0	||	Unmodulated	0.249521
chr4:155725446	chr4	155725446	+	Intron	||	Ssu72	||	10	3	3	||	0.0388889	0	0.0388889	||	1	12	0.0833333	|	0	66	0	|	1	30	0.0333333	||	0	10	0	|	0	33	0	|	0	30	0	||	Unmodulated	0.249521
chr16:31178239	chr16	31178239	-	Intron	||	Acap2	||	6	3	3	||	0.116667	0	0.116667	||	2	8	0.25	|	0	6	0	|	1	10	0.1	||	0	12	0	|	0	7	0	|	0	7	0	||	Unmodulated	0.249521
chr19:7365036	chr19	7365036	-	Intron	||	AI846148	||	4	2	2	||	0.233333	0	0.233333	||	1	5	0.2	|	0	11	0	|	2	4	0.5	||	0	8	0	|	0	11	0	|	0	4	0	||	Unmodulated	0.249521
chr5:107603283	chr5	107603283	+	Intron	||	Rpap2	||	1	2	3	||	0.388889	0	0.388889	||	5	6	0.833333	|	5	15	0.333333	|	0	1	0	||	0	11	0	|	0	16	0	|	0	15	0	||	Unmodulated	0.249521
chr11:116122829	chr11	116122829	-	UTR	||	Trim47;Trim65	||	6	3	3	||	0.0777778	0	0.0777778	||	2	12	0.166667	|	2	30	0.0666667	|	0	10	0	||	0	6	0	|	0	6	0	|	0	7	0	||	Unmodulated	0.249521
chr14:10267817	chr14	10267817	-	Intron	||	Fhit	||	1	3	2	||	0.0777778	0	0.0777778	||	0	7	0	|	1	15	0.0666667	|	1	6	0.166667	||	0	1	0	|	0	9	0	|	0	5	0	||	Unmodulated	0.249521
chr14:73261046	chr14	73261046	-	Intron	||	Rb1	||	8	3	3	||	0.0505051	0.00813008	0.042375	||	1	11	0.0909091	|	2	33	0.0606061	|	0	21	0	||	0	8	0	|	0	39	0	|	1	41	0.0243902	||	Unmodulated	0.249561
chr13:55303172	chr13	55303172	+	Intron	||	Nsd1	||	10	3	3	||	0.0938784	0.0333333	0.0605451	||	2	13	0.153846	|	2	29	0.0689655	|	1	17	0.0588235	||	1	10	0.1	|	0	10	0	|	0	25	0	||	Unmodulated	0.249745
chr17:47622695	chr17	47622695	+	Exon	||	Gm20517;Med20	||	13	3	3	||	0.0512821	0.511905	-0.460623	||	2	13	0.153846	|	0	43	0	|	0	37	0	||	19	19	1	|	15	28	0.535714	|	0	49	0	||	Unmodulated	0.249801
chr2:160688655	chr2	160688655	+	Intron	||	Top1	||	3	2	3	||	0.445221	0	0.445221	||	3	3	1	|	2	13	0.153846	|	2	11	0.181818	||	0	5	0	|	0	10	0	|	0	11	0	||	Unmodulated	0.249837
chr11:82963686	chr11	82963686	+	intergenic	||	Slfn5	||	8	3	3	||	0.111111	0.0151515	0.0959596	||	1	8	0.125	|	0	17	0	|	5	24	0.208333	||	0	9	0	|	1	22	0.0454545	|	0	11	0	||	Unmodulated	0.250403
chr9:65906791	chr9	65906791	+	Intron	||	Trip4	||	4	2	3	||	0.143333	0.025641	0.117692	||	1	4	0.25	|	0	32	0	|	9	50	0.18	||	1	13	0.0769231	|	0	49	0	|	0	86	0	||	Unmodulated	0.250464
chr8:72530837	chr8	72530837	-	Intron	||	Med26	||	2	2	2	||	0.146628	0.025641	0.120987	||	0	2	0	|	8	31	0.258065	|	2	11	0.181818	||	0	2	0	|	1	13	0.0769231	|	0	11	0	||	Unmodulated	0.250486
chr8:79659964	chr8	79659964	+	Intron	||	Otud4	||	18	3	3	||	0.0454165	0.0175439	0.0278726	||	1	18	0.0555556	|	2	39	0.0512821	|	1	34	0.0294118	||	1	19	0.0526316	|	0	39	0	|	0	37	0	||	Unmodulated	0.250495
chr9:88444654	chr9	88444654	-	Intron	||	Gm20537	||	5	3	3	||	0.266667	0.0555556	0.211111	||	2	5	0.4	|	0	6	0	|	2	5	0.4	||	1	6	0.166667	|	0	8	0	|	0	5	0	||	Unmodulated	0.250503
chr14:86658576	chr14	86658576	-	Intron	||	Diaph3	||	1	2	2	||	0.444444	0	0.444444	||	1	1	1	|	2	12	0.166667	|	1	6	0.166667	||	0	9	0	|	0	3	0	|	0	14	0	||	Unmodulated	0.250731
chr12:54765514	chr12	54765514	-	Intron	||	Snx6	||	0	2	2	||	0.0555556	0.32381	-0.268254	||	0	0	NA	|	0	9	0	|	1	9	0.111111	||	4	7	0.571429	|	0	4	0	|	2	5	0.4	||	Unmodulated	0.250825
chr11:74716251	chr11	74716251	-	Intron	||	Pafah1b1	||	11	3	3	||	0.035742	0	0.035742	||	1	13	0.0769231	|	0	43	0	|	1	33	0.030303	||	0	11	0	|	0	33	0	|	0	36	0	||	Unmodulated	0.251215
chrX:152020528	chrX	152020528	+	Intron	||	Smc1a	||	1	2	2	||	0.168831	0	0.168831	||	0	2	0	|	4	28	0.142857	|	4	11	0.363636	||	0	1	0	|	0	16	0	|	0	22	0	||	Unmodulated	0.251521
chr11:75301024	chr11	75301024	-	UTR	||	Rpa1	||	201	3	3	||	0.0286964	0.00662121	0.0220752	||	1	287	0.00348432	|	7	228	0.0307018	|	15	289	0.0519031	||	0	334	0	|	3	201	0.0149254	|	2	405	0.00493827	||	Unmodulated	0.251763
chr14:21838986	chr14	21838986	+	Intron	||	Vdac2	||	4	2	3	||	0.21627	0.0703704	0.145899	||	1	4	0.25	|	1	24	0.0416667	|	5	14	0.357143	||	1	10	0.1	|	0	8	0	|	2	18	0.111111	||	Unmodulated	0.251825
chr4:154919750	chr4	154919750	-	intergenic	||	NA	||	47	3	3	||	0.0217915	0.0014881	0.0203034	||	0	48	0	|	3	142	0.0211268	|	5	113	0.0442478	||	0	47	0	|	0	99	0	|	1	224	0.00446429	||	Unmodulated	0.252016
chr18:32102875	chr18	32102875	+	UTR	||	Iws1	||	20	3	3	||	0.0861761	0.0166667	0.0695095	||	4	23	0.173913	|	2	39	0.0512821	|	1	30	0.0333333	||	1	20	0.05	|	0	31	0	|	0	32	0	||	Unmodulated	0.252176
chr14:75719719	chr14	75719719	-	Exon	||	Cog3	||	46	3	3	||	0.244043	0.121458	0.122585	||	12	46	0.26087	|	17	46	0.369565	|	6	59	0.101695	||	9	69	0.130435	|	13	75	0.173333	|	6	99	0.0606061	||	Unmodulated	0.252313
chr4:108232673	chr4	108232673	-	UTR	||	Zyg11b	||	15	3	3	||	0.126671	0	0.126671	||	6	21	0.285714	|	2	38	0.0526316	|	1	24	0.0416667	||	0	15	0	|	0	41	0	|	0	24	0	||	Unmodulated	0.252454
chr8:107171175	chr8	107171175	+	Intron	||	Cyb5b	||	4	3	2	||	0.0555556	0.291667	-0.236111	||	1	6	0.166667	|	0	24	0	|	0	12	0	||	2	4	0.5	|	3	8	0.375	|	0	5	0	||	Unmodulated	0.252554
chr8:111953494	chr8	111953494	+	UTR	||	Gabarapl2	||	7	3	3	||	0.0661376	0	0.0661376	||	0	7	0	|	1	18	0.0555556	|	2	14	0.142857	||	0	23	0	|	0	27	0	|	0	40	0	||	Unmodulated	0.252648
chr4:109332808	chr4	109332808	+	Intron	||	Eps15	||	8	3	3	||	0	0.0440917	-0.0440917	||	0	8	0	|	0	24	0	|	0	20	0	||	0	13	0	|	1	27	0.037037	|	4	42	0.0952381	||	Unmodulated	0.252648
chr19:8977002	chr19	8977002	+	Intron	||	Eef1g	||	7	3	3	||	0	0.132275	-0.132275	||	0	10	0	|	0	18	0	|	0	15	0	||	2	7	0.285714	|	2	18	0.111111	|	0	8	0	||	Unmodulated	0.252648
chr2:120736975	chr2	120736975	-	UTR	||	Cdan1;Ttbk2	||	6	3	3	||	0.180556	0.0277778	0.152778	||	4	12	0.333333	|	0	25	0	|	5	24	0.208333	||	0	6	0	|	1	12	0.0833333	|	0	18	0	||	Unmodulated	0.252881
chr5:30670879	chr5	30670879	+	Intron	||	Cenpa	||	43	3	3	||	0.0556541	0.00680272	0.0488514	||	5	43	0.116279	|	2	143	0.013986	|	4	109	0.0366972	||	1	49	0.0204082	|	0	77	0	|	0	109	0	||	Unmodulated	0.253084
chr4:155725449	chr4	155725449	+	Intron	||	Ssu72	||	10	3	3	||	0.0385305	0	0.0385305	||	1	12	0.0833333	|	0	67	0	|	1	31	0.0322581	||	0	10	0	|	0	36	0	|	0	30	0	||	Unmodulated	0.253162
chr14:67694361	chr14	67694361	-	UTR	||	Cdca2	||	11	3	3	||	0.125997	0	0.125997	||	3	11	0.272727	|	0	52	0	|	4	38	0.105263	||	0	11	0	|	0	22	0	|	0	39	0	||	Unmodulated	0.253487
chr14:86592602	chr14	86592602	-	intergenic	||	NA	||	2	2	2	||	0	0.184615	-0.184615	||	0	9	0	|	0	6	0	|	0	3	0	||	2	13	0.153846	|	0	2	0	|	2	5	0.4	||	Unmodulated	0.253876
chr17:6431151	chr17	6431151	+	Intron	||	Dynlt1b;Gm26848	||	5	3	3	||	0.2	0.381481	-0.181481	||	3	15	0.2	|	2	5	0.4	|	0	30	0	||	9	20	0.45	|	5	12	0.416667	|	5	18	0.277778	||	Unmodulated	0.254299
chr13:35757614	chr13	35757614	+	Intron	||	Cdyl	||	16	3	3	||	0.0809801	0.0359079	0.0450722	||	2	16	0.125	|	3	42	0.0714286	|	2	43	0.0465116	||	2	24	0.0833333	|	1	41	0.0243902	|	0	106	0	||	Unmodulated	0.254501
chr3:30804527	chr3	30804527	+	Intron	||	Sec62	||	5	3	3	||	0.109668	0	0.109668	||	0	5	0	|	5	21	0.238095	|	1	11	0.0909091	||	0	9	0	|	0	31	0	|	0	30	0	||	Unmodulated	0.254687
chr18:64477315	chr18	64477315	-	Intron	||	Fech	||	21	3	3	||	0.0658009	0	0.0658009	||	3	21	0.142857	|	0	80	0	|	3	55	0.0545455	||	0	23	0	|	0	37	0	|	0	129	0	||	Unmodulated	0.254687
chr11:52105963	chr11	52105963	+	Intron	||	Gm26551;Ppp2ca	||	11	3	3	||	0.0998217	0.0166667	0.0831551	||	2	11	0.181818	|	0	24	0	|	2	17	0.117647	||	1	20	0.05	|	0	16	0	|	0	51	0	||	Unmodulated	0.254756
chr2:126892848	chr2	126892848	-	UTR	||	Sppl2a	||	14	3	3	||	0.0575397	0	0.0575397	||	3	24	0.125	|	2	42	0.047619	|	0	33	0	||	0	25	0	|	0	14	0	|	0	20	0	||	Unmodulated	0.254939
chr1:75188784	chr1	75188784	-	Intron	||	Atg9a	||	4	2	3	||	0.115079	0	0.115079	||	1	4	0.25	|	2	21	0.0952381	|	0	17	0	||	0	10	0	|	0	21	0	|	0	28	0	||	Unmodulated	0.254939
chr13:106996761	chr13	106996761	-	UTR	||	Kif2a	||	10	3	3	||	0.00757576	0.0529412	-0.0453654	||	0	15	0	|	1	44	0.0227273	|	0	36	0	||	1	10	0.1	|	1	17	0.0588235	|	0	45	0	||	Unmodulated	0.254977
chr1:172152150	chr1	172152150	+	Intron	||	Dcaf8	||	4	2	3	||	0	0.12634	-0.12634	||	0	5	0	|	0	16	0	|	0	4	0	||	2	7	0.285714	|	1	29	0.0344828	|	1	17	0.0588235	||	Unmodulated	0.255024
chr11:29718250	chr11	29718250	+	Intron	||	Rtn4	||	3	2	3	||	0.0484211	0	0.0484211	||	0	3	0	|	2	50	0.04	|	2	19	0.105263	||	0	11	0	|	0	31	0	|	0	15	0	||	Unmodulated	0.255217
chr7:102170009	chr7	102170009	-	Intron	||	Nup98	||	20	3	3	||	0	0.067299	-0.067299	||	0	20	0	|	0	38	0	|	0	43	0	||	0	26	0	|	6	41	0.146341	|	3	54	0.0555556	||	Unmodulated	0.255326
chr11:62141410	chr11	62141410	+	UTR	||	Specc1	||	6	3	3	||	0.120024	0.010101	0.109923	||	0	6	0	|	2	17	0.117647	|	8	33	0.242424	||	0	18	0	|	1	33	0.030303	|	0	50	0	||	Unmodulated	0.25547
chr1:128111657	chr1	128111657	+	Exon	||	R3hdm1	||	5	3	3	||	0.266138	0	0.266138	||	6	10	0.6	|	4	28	0.142857	|	1	18	0.0555556	||	0	5	0	|	0	19	0	|	0	19	0	||	Unmodulated	0.255633
chr2:5020268	chr2	5020268	-	intergenic	||	NA	||	2	2	3	||	0.221248	0	0.221248	||	1	2	0.5	|	2	18	0.111111	|	1	19	0.0526316	||	0	6	0	|	0	11	0	|	0	36	0	||	Unmodulated	0.255746
chr3:88992020	chr3	88992020	+	Intron	||	Ash1l	||	11	3	3	||	0.126812	0.0138889	0.112923	||	3	12	0.25	|	3	23	0.130435	|	0	15	0	||	0	11	0	|	1	24	0.0416667	|	0	22	0	||	Unmodulated	0.255961
chr5:90359117	chr5	90359117	-	Intron	||	Ankrd17	||	29	3	3	||	0	0.0316465	-0.0316465	||	0	40	0	|	0	108	0	|	0	107	0	||	2	29	0.0689655	|	2	77	0.025974	|	0	85	0	||	Unmodulated	0.256209
chr17:47616501	chr17	47616501	+	Intron	||	Gm20517;Med20	||	4	3	2	||	0.0952381	0.550725	-0.455487	||	2	7	0.285714	|	0	24	0	|	0	8	0	||	4	4	1	|	15	23	0.652174	|	0	27	0	||	Unmodulated	0.256498
chr9:25260452	chr9	25260452	+	Intron	||	2007-09-01	||	7	3	3	||	0.0555556	0	0.0555556	||	0	10	0	|	2	44	0.0454545	|	4	33	0.121212	||	0	7	0	|	0	35	0	|	0	44	0	||	Unmodulated	0.256689
chr14:121359276	chr14	121359276	-	Intron	||	Stk24	||	3	2	2	||	0	0.152778	-0.152778	||	0	3	0	|	0	19	0	|	0	16	0	||	1	3	0.333333	|	0	6	0	|	1	8	0.125	||	Unmodulated	0.256689
chr2:168213460	chr2	168213460	-	Exon	||	Dpm1;Gm20716	||	1	2	2	||	0	0.152778	-0.152778	||	0	1	0	|	0	12	0	|	0	10	0	||	1	3	0.333333	|	1	8	0.125	|	0	11	0	||	Unmodulated	0.256689
chr2:120600846	chr2	120600846	+	UTR	||	Snap23	||	12	3	3	||	0.0381944	0	0.0381944	||	1	12	0.0833333	|	1	32	0.03125	|	0	22	0	||	0	21	0	|	0	50	0	|	0	26	0	||	Unmodulated	0.256689
chr16:20544381	chr16	20544381	+	UTR	||	Ap2m1	||	4	2	3	||	0.101852	0	0.101852	||	2	9	0.222222	|	1	12	0.0833333	|	0	4	0	||	0	16	0	|	0	10	0	|	0	14	0	||	Unmodulated	0.256689
chr7:138881265	chr7	138881265	+	Intron	||	Ppp2r2d	||	1	2	2	||	0.305556	0	0.305556	||	0	2	0	|	4	6	0.666667	|	2	8	0.25	||	0	1	0	|	0	15	0	|	0	9	0	||	Unmodulated	0.256689
chr11:78680640	chr11	78680640	-	Intron	||	Nlk	||	7	3	3	||	0.106656	0.0144928	0.0921628	||	2	9	0.222222	|	1	38	0.0263158	|	2	28	0.0714286	||	0	7	0	|	1	23	0.0434783	|	0	11	0	||	Unmodulated	0.25688
chr13:98793078	chr13	98793078	-	Intron	||	Fcho2	||	5	3	3	||	0.0880214	0	0.0880214	||	1	5	0.2	|	1	27	0.037037	|	1	37	0.027027	||	0	13	0	|	0	35	0	|	0	34	0	||	Unmodulated	0.256987
chr9:72556380	chr9	72556380	+	Intron	||	Rfx7	||	2	2	2	||	0.299259	0.0111111	0.288148	||	2	3	0.666667	|	2	18	0.111111	|	3	25	0.12	||	0	2	0	|	1	30	0.0333333	|	0	8	0	||	Unmodulated	0.25706
chr16:91656133	chr16	91656133	+	Exon	||	Son	||	147	3	3	||	0.005839	0.013824	-0.00798504	||	1	147	0.00680272	|	3	280	0.0107143	|	0	239	0	||	2	170	0.0117647	|	5	215	0.0232558	|	2	310	0.00645161	||	Unmodulated	0.257089
chr8:3179691	chr8	3179691	-	Intron	||	Insr	||	4	2	3	||	0.0666667	0.309524	-0.242857	||	1	5	0.2	|	0	9	0	|	0	4	0	||	0	5	0	|	3	7	0.428571	|	3	6	0.5	||	Unmodulated	0.257207
chr10:86991860	chr10	86991860	-	Intron	||	Gm16271;Stab2	||	2	3	2	||	0.0208333	0.225589	-0.204756	||	0	6	0	|	0	6	0	|	1	16	0.0625	||	0	2	0	|	2	9	0.222222	|	5	11	0.454545	||	Unmodulated	0.257416
chr16:17517957	chr16	17517957	+	Intron	||	Lztr1	||	12	3	3	||	0.158615	0.0222222	0.136393	||	4	12	0.333333	|	2	23	0.0869565	|	1	18	0.0555556	||	1	15	0.0666667	|	0	17	0	|	0	14	0	||	Unmodulated	0.257423
chrX:18171419	chrX	18171419	+	Intron	||	Kdm6a	||	2	3	2	||	0.091358	0	0.091358	||	1	5	0.2	|	2	27	0.0740741	|	0	14	0	||	0	2	0	|	0	16	0	|	0	23	0	||	Unmodulated	0.258068
chr2:154586369	chr2	154586369	-	UTR	||	Pxmp4	||	4	3	2	||	0.137037	0	0.137037	||	1	9	0.111111	|	0	19	0	|	3	10	0.3	||	0	4	0	|	0	11	0	|	0	9	0	||	Unmodulated	0.258068
chr14:55550106	chr14	55550106	+	intergenic	||	Pck2	||	1	2	3	||	0.137037	0	0.137037	||	0	1	0	|	3	10	0.3	|	1	9	0.111111	||	0	7	0	|	0	13	0	|	0	23	0	||	Unmodulated	0.258068
chr1:87715770	chr1	87715770	+	Intron	||	Inpp5d	||	7	3	3	||	0.278439	0.0416667	0.236772	||	4	7	0.571429	|	2	36	0.0555556	|	5	24	0.208333	||	2	16	0.125	|	0	17	0	|	0	19	0	||	Unmodulated	0.258364
chr5:125457494	chr5	125457494	+	UTR	||	Bri3bp	||	14	3	3	||	0.094053	0	0.094053	||	3	14	0.214286	|	1	26	0.0384615	|	1	34	0.0294118	||	0	15	0	|	0	17	0	|	0	18	0	||	Unmodulated	0.258472
chr2:14148682	chr2	14148682	+	UTR	||	Stam	||	3	3	2	||	0.265873	0	0.265873	||	0	6	0	|	3	14	0.214286	|	7	12	0.583333	||	0	3	0	|	0	15	0	|	0	24	0	||	Unmodulated	0.258978
chr6:35093406	chr6	35093406	-	Intron	||	Cnot4	||	7	3	3	||	0	0.0414141	-0.0414141	||	0	7	0	|	0	27	0	|	0	16	0	||	1	11	0.0909091	|	0	35	0	|	1	30	0.0333333	||	Unmodulated	0.259184
chr9:70556258	chr9	70556258	+	Intron	||	Sltm	||	4	3	2	||	0.181217	0.0666667	0.11455	||	2	8	0.25	|	1	14	0.0714286	|	2	9	0.222222	||	1	5	0.2	|	0	10	0	|	0	4	0	||	Unmodulated	0.259226
chr8:3179422	chr8	3179422	-	Intron	||	Insr	||	6	3	3	||	0.229365	0.0666667	0.162698	||	10	24	0.416667	|	1	14	0.0714286	|	2	10	0.2	||	3	15	0.2	|	0	6	0	|	0	7	0	||	Unmodulated	0.259253
chr4:41362858	chr4	41362858	+	Intron	||	Ubap1	||	1	2	2	||	0.166667	0.0175439	0.149123	||	1	3	0.333333	|	0	12	0	|	1	6	0.166667	||	0	1	0	|	1	19	0.0526316	|	0	25	0	||	Unmodulated	0.259319
chr9:20939919	chr9	20939919	-	Intron	||	Dnmt1	||	10	3	3	||	0.0877519	0	0.0877519	||	2	10	0.2	|	1	25	0.04	|	1	43	0.0232558	||	0	14	0	|	0	10	0	|	0	44	0	||	Unmodulated	0.259601
chr7:130488248	chr7	130488248	-	Intron	||	Ate1;Fgfr2	||	5	3	3	||	0.0166667	0.195833	-0.179167	||	0	7	0	|	2	40	0.05	|	0	22	0	||	2	5	0.4	|	3	16	0.1875	|	0	15	0	||	Unmodulated	0.259782
chr1:65166626	chr1	65166626	-	Intron	||	Idh1	||	2	2	2	||	0.227273	0	0.227273	||	1	2	0.5	|	0	6	0	|	2	11	0.181818	||	0	6	0	|	0	7	0	|	0	3	0	||	Unmodulated	0.260105
chr15:102491710	chr15	102491710	+	Intron	||	Pcbp2	||	11	3	3	||	0.0119048	0.0580247	-0.0461199	||	0	11	0	|	1	28	0.0357143	|	0	14	0	||	2	20	0.1	|	2	27	0.0740741	|	0	42	0	||	Unmodulated	0.260409
chr3:87921451	chr3	87921451	+	Intron	||	Mrpl24	||	25	3	3	||	0.088708	0.0499225	0.0387855	||	2	28	0.0714286	|	8	73	0.109589	|	4	47	0.0851064	||	2	25	0.08	|	3	43	0.0697674	|	0	39	0	||	Unmodulated	0.260668
chr5:20907945	chr5	20907945	-	Intron	||	Rsbn1l	||	7	3	3	||	0.0819257	0	0.0819257	||	3	16	0.1875	|	1	32	0.03125	|	1	37	0.027027	||	0	7	0	|	0	42	0	|	0	44	0	||	Unmodulated	0.260933
chr15:25632361	chr15	25632361	+	Intron	||	Myo10	||	5	3	3	||	0.311111	0.0444444	0.266667	||	3	5	0.6	|	3	9	0.333333	|	0	8	0	||	2	15	0.133333	|	0	7	0	|	0	5	0	||	Unmodulated	0.26111
chr3:105738198	chr3	105738198	-	Intron	||	Rap1a	||	25	3	3	||	0.0632469	0.0133333	0.0499136	||	4	49	0.0816327	|	4	37	0.108108	|	0	30	0	||	0	40	0	|	1	25	0.04	|	0	35	0	||	Unmodulated	0.261864
chr14:21529427	chr14	21529427	+	Intron	||	Kat6b	||	0	2	2	||	0.437037	0	0.437037	||	4	4	1	|	1	9	0.111111	|	2	10	0.2	||	0	0	NA	|	0	11	0	|	0	7	0	||	Unmodulated	0.262096
chr1:59688866	chr1	59688866	+	Intron	||	Nop58	||	7	3	3	||	0.0847222	0	0.0847222	||	0	10	0	|	3	16	0.1875	|	1	15	0.0666667	||	0	7	0	|	0	20	0	|	0	15	0	||	Unmodulated	0.262594
chr13:21389999	chr13	21389999	-	UTR	||	Zkscan3	||	6	3	3	||	0.109802	0	0.109802	||	2	8	0.25	|	3	49	0.0612245	|	1	55	0.0181818	||	0	6	0	|	0	26	0	|	0	13	0	||	Unmodulated	0.26294
chr5:53601769	chr5	53601769	+	Intron	||	Rbpj	||	2	2	3	||	0.218421	0	0.218421	||	1	2	0.5	|	1	20	0.05	|	2	19	0.105263	||	0	8	0	|	0	15	0	|	0	15	0	||	Unmodulated	0.263117
chr15:80717236	chr15	80717236	+	Intron	||	Tnrc6b	||	4	2	3	||	0	0.0751634	-0.0751634	||	0	4	0	|	0	26	0	|	0	22	0	||	1	6	0.166667	|	1	17	0.0588235	|	0	23	0	||	Unmodulated	0.26341
chr7:29222818	chr7	29222818	-	UTR	||	Kcnk6	||	12	3	3	||	0.0751634	0	0.0751634	||	1	17	0.0588235	|	2	12	0.166667	|	0	21	0	||	0	18	0	|	0	16	0	|	0	13	0	||	Unmodulated	0.26341
chr8:25723216	chr8	25723216	+	Intron	||	Plpp5	||	6	3	3	||	0.0751634	0	0.0751634	||	1	6	0.166667	|	1	17	0.0588235	|	0	10	0	||	0	13	0	|	0	7	0	|	0	18	0	||	Unmodulated	0.26341
chr7:130489359	chr7	130489359	-	Intron	||	Ate1;Fgfr2	||	3	3	2	||	0.205291	0.0148148	0.190476	||	4	9	0.444444	|	1	35	0.0285714	|	4	28	0.142857	||	0	3	0	|	2	45	0.0444444	|	0	31	0	||	Unmodulated	0.26349
chr11:106816926	chr11	106816926	+	Intron	||	Cep95	||	2	2	2	||	0.714286	0.246032	0.468254	||	2	2	1	|	5	5	1	|	2	14	0.142857	||	0	4	0	|	1	14	0.0714286	|	4	6	0.666667	||	Unmodulated	0.263583
chr6:72432366	chr6	72432366	+	intergenic	||	NA	||	6	3	3	||	0.140171	0.0555556	0.0846154	||	1	6	0.166667	|	1	10	0.1	|	2	13	0.153846	||	1	6	0.166667	|	0	14	0	|	0	8	0	||	Unmodulated	0.263868
chr7:98625093	chr7	98625093	-	Intron	||	Emsy	||	2	2	2	||	0.108333	0.0196078	0.0887255	||	1	5	0.2	|	0	2	0	|	1	8	0.125	||	0	4	0	|	1	17	0.0588235	|	0	12	0	||	Unmodulated	0.26418
chr17:36005339	chr17	36005339	-	Intron	||	A930015D03Rik	||	16	3	3	||	0.173775	0	0.173775	||	1	16	0.0625	|	3	51	0.0588235	|	10	25	0.4	||	0	29	0	|	0	44	0	|	0	46	0	||	Unmodulated	0.26428
chr17:46196609	chr17	46196609	-	Intron	||	Polh	||	1	3	2	||	0.0642857	0	0.0642857	||	1	7	0.142857	|	0	27	0	|	1	20	0.05	||	0	1	0	|	0	10	0	|	0	13	0	||	Unmodulated	0.264335
chr6:31515747	chr6	31515747	+	UTR	||	Mkln1	||	11	3	3	||	0.0642857	0	0.0642857	||	0	11	0	|	1	20	0.05	|	2	14	0.142857	||	0	13	0	|	0	27	0	|	0	19	0	||	Unmodulated	0.264335
chr2:23032626	chr2	23032626	-	Intron	||	Abi1	||	4	2	3	||	0.010101	0.0479798	-0.0378788	||	0	4	0	|	0	47	0	|	1	33	0.030303	||	0	5	0	|	2	24	0.0833333	|	2	33	0.0606061	||	Unmodulated	0.26448
chr3:95089958	chr3	95089958	-	Intron	||	Pip5k1a	||	5	3	3	||	0.260847	0	0.260847	||	3	5	0.6	|	2	18	0.111111	|	1	14	0.0714286	||	0	8	0	|	0	13	0	|	0	5	0	||	Unmodulated	0.264611
chr9:21683083	chr9	21683083	+	Intron	||	Smarca4	||	32	3	3	||	0.0865753	0.0141844	0.0723909	||	14	77	0.181818	|	10	242	0.0413223	|	6	164	0.0365854	||	2	47	0.0425532	|	0	32	0	|	0	38	0	||	Unmodulated	0.26462
chr9:65068853	chr9	65068853	+	Intron	||	AC122463.1;Dpp8	||	10	3	3	||	0.122222	0.0277778	0.0944444	||	2	10	0.2	|	4	24	0.166667	|	0	14	0	||	1	12	0.0833333	|	0	29	0	|	0	20	0	||	Unmodulated	0.264824
chr10:58419056	chr10	58419056	+	Intron	||	Lims1	||	7	3	3	||	0.0833333	0.0196078	0.0637255	||	1	8	0.125	|	0	24	0	|	4	32	0.125	||	0	7	0	|	0	16	0	|	1	17	0.0588235	||	Unmodulated	0.265007
chr14:61663977	chr14	61663977	-	Intron	||	Dleu2;Gm27017	||	11	3	3	||	0.0867091	0.0133075	0.0734016	||	2	11	0.181818	|	2	74	0.027027	|	4	78	0.0512821	||	1	43	0.0232558	|	1	60	0.0166667	|	0	86	0	||	Unmodulated	0.265012
chr5:115046118	chr5	115046118	-	Intron	||	Sppl3	||	6	3	3	||	0.102708	0.0185185	0.0841892	||	0	8	0	|	2	17	0.117647	|	4	21	0.190476	||	0	6	0	|	1	18	0.0555556	|	0	19	0	||	Unmodulated	0.265087
chr11:5096124	chr11	5096124	-	Intron	||	Ewsr1	||	9	3	3	||	0.0508077	0	0.0508077	||	0	9	0	|	6	53	0.113208	|	2	51	0.0392157	||	0	17	0	|	0	42	0	|	0	50	0	||	Unmodulated	0.265475
chrX:152020513	chrX	152020513	+	Intron	||	Smc1a	||	1	2	2	||	0.19943	0	0.19943	||	0	2	0	|	4	26	0.153846	|	4	9	0.444444	||	0	1	0	|	0	15	0	|	0	18	0	||	Unmodulated	0.265555
chr2:72369915	chr2	72369915	+	Intron	||	Map3k20	||	2	2	3	||	0.0997151	0	0.0997151	||	0	2	0	|	1	13	0.0769231	|	2	9	0.222222	||	0	5	0	|	0	8	0	|	0	19	0	||	Unmodulated	0.265555
chr11:77415418	chr11	77415418	+	Intron	||	Ssh2	||	11	3	3	||	0.015873	0.0956938	-0.0798208	||	1	21	0.047619	|	0	26	0	|	0	24	0	||	2	11	0.181818	|	2	19	0.105263	|	0	27	0	||	Unmodulated	0.265778
chr5:146209431	chr5	146209431	-	UTR	||	Rnf6	||	5	3	3	||	0	0.0448276	-0.0448276	||	0	13	0	|	0	12	0	|	0	18	0	||	1	29	0.0344828	|	0	5	0	|	1	10	0.1	||	Unmodulated	0.265978
chr9:72673785	chr9	72673785	+	Intron	||	Nedd4	||	2	2	3	||	0	0.162879	-0.162879	||	0	2	0	|	0	22	0	|	0	11	0	||	4	11	0.363636	|	3	24	0.125	|	0	9	0	||	Unmodulated	0.266323
chr12:35069941	chr12	35069941	+	Intron	||	Snx13	||	7	3	3	||	0.0555556	0.0111111	0.0444444	||	1	10	0.1	|	2	30	0.0666667	|	0	13	0	||	0	7	0	|	1	30	0.0333333	|	0	27	0	||	Unmodulated	0.266693
chr12:76601274	chr12	76601274	-	Intron	||	Sptb	||	8	3	3	||	0.216486	0	0.216486	||	4	8	0.5	|	2	23	0.0869565	|	1	16	0.0625	||	0	11	0	|	0	19	0	|	0	32	0	||	Unmodulated	0.266702
chrX:151869927	chrX	151869927	+	Intron	||	Huwe1	||	11	3	3	||	0.188889	0.0123457	0.176543	||	6	15	0.4	|	3	18	0.166667	|	0	11	0	||	0	13	0	|	1	27	0.037037	|	0	14	0	||	Unmodulated	0.266718
chr2:152325820	chr2	152325820	-	Intron	||	Rbck1	||	9	3	3	||	0.159398	0	0.159398	||	7	19	0.368421	|	2	35	0.0571429	|	1	19	0.0526316	||	0	9	0	|	0	23	0	|	0	25	0	||	Unmodulated	0.266748
chr2:164753328	chr2	164753328	+	Intron	||	Dnttip1	||	9	3	3	||	0	0.0706496	-0.0706496	||	0	9	0	|	0	16	0	|	0	19	0	||	3	19	0.157895	|	0	12	0	|	2	37	0.0540541	||	Unmodulated	0.266775
chr4:155621049	chr4	155621049	+	UTR	||	Gm10563;Gm16023;Slc35e2	||	19	3	3	||	0.0318519	0.00680272	0.0250491	||	1	25	0.04	|	0	33	0	|	2	36	0.0555556	||	0	19	0	|	1	49	0.0204082	|	0	59	0	||	Unmodulated	0.266832
chr10:82703889	chr10	82703889	+	Intron	||	Hcfc2	||	6	3	3	||	0.405983	0.0606061	0.345377	||	5	6	0.833333	|	2	39	0.0512821	|	2	6	0.333333	||	0	11	0	|	2	11	0.181818	|	0	15	0	||	Unmodulated	0.267024
chr17:12760310	chr17	12760310	+	Intron	||	Airn;Igf2r	||	4	3	2	||	0	0.131373	-0.131373	||	0	10	0	|	0	19	0	|	0	22	0	||	1	10	0.1	|	5	17	0.294118	|	0	4	0	||	Unmodulated	0.26753
chr11:86748486	chr11	86748486	-	Intron	||	Cltc	||	6	3	3	||	0.237654	0.0277778	0.209877	||	3	6	0.5	|	1	36	0.0277778	|	5	27	0.185185	||	1	12	0.0833333	|	0	26	0	|	0	26	0	||	Unmodulated	0.26757
chr9:96305639	chr9	96305639	+	Exon	||	Tfdp2	||	19	3	3	||	0.0234962	0	0.0234962	||	1	19	0.0526316	|	0	87	0	|	1	56	0.0178571	||	0	24	0	|	0	65	0	|	0	113	0	||	Unmodulated	0.267761
chr10:77322607	chr10	77322607	-	Exon	||	Adarb1	||	4	2	2	||	0.470238	0.783333	-0.313095	||	7	8	0.875	|	1	4	0.25	|	4	14	0.285714	||	8	8	1	|	6	10	0.6	|	3	4	0.75	||	Unmodulated	0.267881
chr17:47586900	chr17	47586900	+	Intron	||	Ccnd3	||	6	3	3	||	0.00757576	0.0588235	-0.0512478	||	0	11	0	|	1	44	0.0227273	|	0	6	0	||	2	17	0.117647	|	2	34	0.0588235	|	0	6	0	||	Unmodulated	0.26789
chr11:78306273	chr11	78306273	+	Intron	||	Spag5	||	22	3	3	||	0.078459	0	0.078459	||	4	22	0.181818	|	1	43	0.0232558	|	1	33	0.030303	||	0	24	0	|	0	32	0	|	0	69	0	||	Unmodulated	0.268546
chr12:111799151	chr12	111799151	+	Intron	||	Klc1	||	12	3	3	||	0.139683	0.0555556	0.084127	||	2	12	0.166667	|	4	24	0.166667	|	3	35	0.0857143	||	2	12	0.166667	|	0	25	0	|	0	20	0	||	Unmodulated	0.269488
chr8:71363926	chr8	71363926	+	intergenic	||	NA	||	4	2	3	||	0.222222	0	0.222222	||	2	4	0.5	|	0	9	0	|	1	6	0.166667	||	0	8	0	|	0	5	0	|	0	9	0	||	Unmodulated	0.269703
chr12:40209756	chr12	40209756	-	Intron	||	Gm17024;Ifrd1	||	5	3	3	||	0	0.266667	-0.266667	||	0	5	0	|	0	5	0	|	0	5	0	||	3	5	0.6	|	1	5	0.2	|	0	5	0	||	Unmodulated	0.269703
chr7:97130223	chr7	97130223	+	Intron	||	Gab2	||	5	3	3	||	0	0.0952381	-0.0952381	||	0	5	0	|	0	20	0	|	0	9	0	||	3	14	0.214286	|	1	14	0.0714286	|	0	6	0	||	Unmodulated	0.269703
chr10:9887539	chr10	9887539	-	Intron	||	Stxbp5	||	3	3	2	||	0.0701754	0	0.0701754	||	0	7	0	|	1	19	0.0526316	|	3	19	0.157895	||	0	7	0	|	0	3	0	|	0	11	0	||	Unmodulated	0.269703
chr12:55742239	chr12	55742239	-	Intron	||	Ralgapa1	||	0	3	2	||	0.0888889	0	0.0888889	||	1	5	0.2	|	1	15	0.0666667	|	0	9	0	||	0	0	NA	|	0	7	0	|	0	9	0	||	Unmodulated	0.269703
chr17:32819218	chr17	32819218	-	UTR	||	Gm26693;Zfp799	||	6	3	3	||	0.133333	0	0.133333	||	1	10	0.1	|	3	10	0.3	|	0	8	0	||	0	8	0	|	0	6	0	|	0	9	0	||	Unmodulated	0.269703
chr14:21384977	chr14	21384977	+	Intron	||	Adk	||	4	2	3	||	0	0.148148	-0.148148	||	0	4	0	|	0	16	0	|	0	5	0	||	2	6	0.333333	|	0	13	0	|	2	18	0.111111	||	Unmodulated	0.269703
chr2:126892827	chr2	126892827	-	UTR	||	Sppl2a	||	16	3	3	||	0.0325203	0	0.0325203	||	0	21	0	|	3	41	0.0731707	|	1	41	0.0243902	||	0	27	0	|	0	16	0	|	0	26	0	||	Unmodulated	0.269703
chr12:3490213	chr12	3490213	+	Intron	||	Asxl2	||	8	3	3	||	0.034188	0	0.034188	||	1	13	0.0769231	|	1	39	0.025641	|	0	19	0	||	0	8	0	|	0	26	0	|	0	21	0	||	Unmodulated	0.269703
chr10:78186447	chr10	78186447	-	intergenic	||	NA	||	5	3	3	||	0.148148	0	0.148148	||	1	9	0.111111	|	2	6	0.333333	|	0	5	0	||	0	8	0	|	0	11	0	|	0	10	0	||	Unmodulated	0.269703
chr6:58652728	chr6	58652728	+	Intron	||	Abcg2	||	6	3	3	||	0.148148	0	0.148148	||	2	6	0.333333	|	0	14	0	|	3	27	0.111111	||	0	13	0	|	0	35	0	|	0	26	0	||	Unmodulated	0.269703
chrX:99074547	chrX	99074547	+	UTR	||	Stard8	||	1	2	3	||	0.166667	0	0.166667	||	3	8	0.375	|	1	8	0.125	|	0	1	0	||	0	10	0	|	0	12	0	|	0	9	0	||	Unmodulated	0.269703
chr6:92195231	chr6	92195231	-	Intron	||	Rbsn	||	1	2	2	||	0.444444	0	0.444444	||	1	1	1	|	3	9	0.333333	|	0	5	0	||	0	6	0	|	0	6	0	|	0	3	0	||	Unmodulated	0.269703
chr4:120778636	chr4	120778636	-	Intron	||	Nfyc	||	12	3	3	||	0	0.0740741	-0.0740741	||	0	12	0	|	0	33	0	|	0	18	0	||	2	12	0.166667	|	1	18	0.0555556	|	0	34	0	||	Unmodulated	0.269703
chr7:114458056	chr7	114458056	+	Intron	||	Pde3b	||	2	3	2	||	0.126984	0	0.126984	||	2	7	0.285714	|	0	12	0	|	2	21	0.0952381	||	0	2	0	|	0	13	0	|	0	11	0	||	Unmodulated	0.269703
chr17:46499878	chr17	46499878	+	Intron	||	Gm26904	||	2	2	3	||	0.433048	0	0.433048	||	1	13	0.0769231	|	2	9	0.222222	|	2	2	1	||	0	21	0	|	0	19	0	|	0	7	0	||	Unmodulated	0.269855
chr7:19139761	chr7	19139761	-	intergenic	||	Fbxo46;Qpctl	||	5	3	3	||	0.155556	0.025641	0.129915	||	3	10	0.3	|	3	18	0.166667	|	0	8	0	||	1	13	0.0769231	|	0	9	0	|	0	5	0	||	Unmodulated	0.269966
chr3:116681920	chr3	116681920	-	Intron	||	Slc35a3	||	5	3	3	||	0.258824	0	0.258824	||	3	5	0.6	|	2	17	0.117647	|	1	17	0.0588235	||	0	5	0	|	0	13	0	|	0	16	0	||	Unmodulated	0.270172
chr15:25631975	chr15	25631975	+	Intron	||	Myo10	||	3	3	2	||	0.0238095	0.209524	-0.185714	||	0	8	0	|	1	14	0.0714286	|	0	6	0	||	3	7	0.428571	|	1	5	0.2	|	0	3	0	||	Unmodulated	0.270441
chr11:101578871	chr11	101578871	+	Intron	||	Nbr1	||	4	2	3	||	0.344017	0.0392157	0.304801	||	3	4	0.75	|	3	26	0.115385	|	7	42	0.166667	||	2	17	0.117647	|	0	19	0	|	0	28	0	||	Unmodulated	0.271002
chr6:83415083	chr6	83415083	-	Intron	||	Tet3	||	6	3	3	||	0.138177	0.0333333	0.104843	||	2	9	0.222222	|	0	45	0	|	5	26	0.192308	||	0	6	0	|	1	10	0.1	|	0	8	0	||	Unmodulated	0.271276
chrX:152766485	chrX	152766485	-	Intron	||	Shroom2	||	3	2	2	||	0.355556	0.0666667	0.288889	||	2	3	0.666667	|	0	5	0	|	2	5	0.4	||	2	10	0.2	|	0	9	0	|	0	4	0	||	Unmodulated	0.271402
chr8:72735952	chr8	72735952	+	Intron	||	Sin3b	||	4	2	3	||	0.291667	0.0666667	0.225	||	0	4	0	|	3	8	0.375	|	5	10	0.5	||	1	5	0.2	|	0	8	0	|	0	15	0	||	Unmodulated	0.271826
chr8:107092176	chr8	107092176	-	Intron	||	Terf2	||	6	3	3	||	0.0175439	0.140693	-0.123149	||	0	13	0	|	1	19	0.0526316	|	0	6	0	||	2	7	0.285714	|	3	22	0.136364	|	0	15	0	||	Unmodulated	0.271882
chr17:47671345	chr17	47671345	+	Intron	||	Gm20517;Usp49	||	2	3	2	||	0.0952381	0.526316	-0.431078	||	2	7	0.285714	|	0	14	0	|	0	8	0	||	2	2	1	|	11	19	0.578947	|	0	33	0	||	Unmodulated	0.272332
chr17:47617811	chr17	47617811	+	Intron	||	Gm20517;Med20	||	6	3	3	||	0.0555556	0.486486	-0.430931	||	1	6	0.166667	|	0	28	0	|	0	19	0	||	15	15	1	|	17	37	0.459459	|	0	37	0	||	Unmodulated	0.272514
chr11:75300630	chr11	75300630	-	UTR	||	Rpa1	||	235	3	3	||	0.0658345	0.00199005	0.0638445	||	45	301	0.149502	|	3	297	0.010101	|	13	343	0.0379009	||	2	335	0.00597015	|	0	235	0	|	0	539	0	||	Unmodulated	0.272518
chr2:121184981	chr2	121184981	+	Exon	||	Tubgcp4	||	12	3	3	||	0.0735736	0	0.0735736	||	2	12	0.166667	|	0	31	0	|	2	37	0.0540541	||	0	17	0	|	0	28	0	|	0	27	0	||	Unmodulated	0.272696
chr7:80712397	chr7	80712397	-	UTR	||	Iqgap1	||	97	3	3	||	0.0369543	0	0.0369543	||	10	116	0.0862069	|	2	201	0.00995025	|	3	204	0.0147059	||	0	126	0	|	0	97	0	|	0	133	0	||	Unmodulated	0.272786
chr16:16880888	chr16	16880888	+	Intron	||	Top3b	||	13	3	3	||	0.194444	0.0333333	0.161111	||	6	16	0.375	|	5	24	0.208333	|	0	18	0	||	2	20	0.1	|	0	13	0	|	0	19	0	||	Unmodulated	0.272788
chr7:122313053	chr7	122313053	+	Intron	||	Prkcb	||	4	3	2	||	0.0959963	0	0.0959963	||	4	18	0.222222	|	1	82	0.0121951	|	3	56	0.0535714	||	0	12	0	|	0	4	0	|	0	20	0	||	Unmodulated	0.273654
chr5:144011772	chr5	144011772	-	Intron	||	Ccz1	||	7	3	3	||	0.0978836	0	0.0978836	||	2	9	0.222222	|	1	14	0.0714286	|	0	8	0	||	0	7	0	|	0	11	0	|	0	14	0	||	Unmodulated	0.273672
chr11:96966012	chr11	96966012	+	Intron	||	Sp2	||	7	3	3	||	0.134921	0.0333333	0.101587	||	0	7	0	|	6	28	0.214286	|	4	21	0.190476	||	0	9	0	|	0	11	0	|	1	10	0.1	||	Unmodulated	0.273897
chr1:171698141	chr1	171698141	+	Intron	||	Cd48	||	2	3	2	||	0.430556	0	0.430556	||	7	7	1	|	9	40	0.225	|	2	30	0.0666667	||	0	6	0	|	0	10	0	|	0	2	0	||	Unmodulated	0.273979
chr2:121492422	chr2	121492422	-	UTR	||	Mfap1a	||	10	3	3	||	0.0785714	0	0.0785714	||	0	10	0	|	5	28	0.178571	|	2	35	0.0571429	||	0	23	0	|	0	35	0	|	0	44	0	||	Unmodulated	0.274155
chr2:128160351	chr2	128160351	+	UTR	||	Bcl2l11	||	13	3	3	||	0.0382448	0	0.0382448	||	0	13	0	|	1	36	0.0277778	|	2	23	0.0869565	||	0	15	0	|	0	19	0	|	0	16	0	||	Unmodulated	0.274344
chr1:171897704	chr1	171897704	-	UTR	||	Gm10521	||	6	3	3	||	0.215332	0	0.215332	||	3	6	0.5	|	3	98	0.0306122	|	9	78	0.115385	||	0	6	0	|	0	18	0	|	0	18	0	||	Unmodulated	0.274459
chr11:45861990	chr11	45861990	+	Intron	||	Clint1	||	18	3	3	||	0.0396116	0.015873	0.0237385	||	1	20	0.05	|	1	41	0.0243902	|	2	45	0.0444444	||	0	18	0	|	0	25	0	|	1	21	0.047619	||	Unmodulated	0.274476
chr4:126169867	chr4	126169867	-	Intron	||	Thrap3	||	6	3	3	||	0.151111	0.00595238	0.145159	||	2	6	0.333333	|	0	34	0	|	3	25	0.12	||	0	9	0	|	0	54	0	|	1	56	0.0178571	||	Unmodulated	0.274635
chr13:98766196	chr13	98766196	-	Intron	||	Fcho2	||	9	3	3	||	0.025641	0.121693	-0.0960521	||	1	13	0.0769231	|	0	26	0	|	0	17	0	||	2	9	0.222222	|	3	21	0.142857	|	0	31	0	||	Unmodulated	0.275536
chr7:127566700	chr7	127566700	+	UTR	||	Gm28198;Gm42715;Tmem265	||	6	3	3	||	0	0.0730994	-0.0730994	||	0	10	0	|	0	18	0	|	0	17	0	||	1	6	0.166667	|	1	19	0.0526316	|	0	20	0	||	Unmodulated	0.275591
chr15:103247656	chr15	103247656	-	intergenic	||	NA	||	9	3	3	||	0.161022	0.0333333	0.127689	||	3	9	0.333333	|	1	17	0.0588235	|	2	22	0.0909091	||	0	9	0	|	2	20	0.1	|	0	30	0	||	Unmodulated	0.276292
chr8:107018209	chr8	107018209	+	intergenic	||	Sntb2	||	9	3	3	||	0.278474	0.117576	0.160898	||	4	14	0.285714	|	4	9	0.444444	|	2	19	0.105263	||	3	11	0.272727	|	2	25	0.08	|	0	17	0	||	Unmodulated	0.276475
chr7:122313163	chr7	122313163	+	Intron	||	Gm45191;Prkcb	||	9	3	3	||	0.0145833	0	0.0145833	||	1	30	0.0333333	|	0	104	0	|	1	96	0.0104167	||	0	11	0	|	0	9	0	|	0	14	0	||	Unmodulated	0.276722
chr14:67694457	chr14	67694457	-	Intron	||	Cdca2	||	7	3	3	||	0.0583333	0	0.0583333	||	2	15	0.133333	|	2	48	0.0416667	|	0	24	0	||	0	7	0	|	0	20	0	|	0	25	0	||	Unmodulated	0.276722
chr12:4647792	chr12	4647792	+	Intron	||	AC158232.1;Itsn2	||	2	3	2	||	0	0.4375	-0.4375	||	0	7	0	|	0	24	0	|	0	20	0	||	2	2	1	|	5	16	0.3125	|	0	9	0	||	Unmodulated	0.276722
chr9:56491078	chr9	56491078	+	Intron	||	Hmg20a	||	1	3	2	||	0	0.175	-0.175	||	0	5	0	|	0	10	0	|	0	6	0	||	1	8	0.125	|	0	1	0	|	2	5	0.4	||	Unmodulated	0.276722
chr7:102170618	chr7	102170618	-	Intron	||	Nup98	||	15	3	3	||	0	0.0291667	-0.0291667	||	0	21	0	|	0	37	0	|	0	38	0	||	1	15	0.0666667	|	1	48	0.0208333	|	0	44	0	||	Unmodulated	0.276722
chr4:126944333	chr4	126944333	-	Intron	||	Zmym4	||	3	2	3	||	0.030303	0.122222	-0.0919192	||	0	3	0	|	1	11	0.0909091	|	0	5	0	||	1	5	0.2	|	1	6	0.166667	|	0	5	0	||	Unmodulated	0.276968
chr6:113713223	chr6	113713223	+	intergenic	||	NA	||	3	3	2	||	0.312169	0	0.312169	||	5	7	0.714286	|	0	9	0	|	2	9	0.222222	||	0	3	0	|	0	8	0	|	0	17	0	||	Unmodulated	0.277202
chr4:3749470	chr4	3749470	+	Intron	||	Lyn	||	4	2	3	||	0.0246914	0.130952	-0.106261	||	0	4	0	|	2	27	0.0740741	|	0	13	0	||	2	8	0.25	|	0	20	0	|	1	7	0.142857	||	Unmodulated	0.277286
chr5:105547977	chr5	105547977	+	Intron	||	Lrrc8c	||	4	3	2	||	0.0485313	0	0.0485313	||	1	9	0.111111	|	0	26	0	|	1	29	0.0344828	||	0	4	0	|	0	12	0	|	0	15	0	||	Unmodulated	0.277467
chr4:40985121	chr4	40985121	+	Intron	||	Nfx1	||	2	2	3	||	0.217949	0	0.217949	||	1	2	0.5	|	0	25	0	|	2	13	0.153846	||	0	5	0	|	0	6	0	|	0	7	0	||	Unmodulated	0.27839
chr10:86905227	chr10	86905227	-	Intron	||	Stab2	||	4	2	3	||	0.111111	0.343687	-0.232576	||	2	6	0.333333	|	0	4	0	|	0	12	0	||	5	8	0.625	|	4	30	0.133333	|	3	11	0.272727	||	Unmodulated	0.278784
chr10:116484397	chr10	116484397	-	intergenic	||	NA	||	3	3	2	||	0.118687	0	0.118687	||	1	12	0.0833333	|	0	19	0	|	3	11	0.272727	||	0	3	0	|	0	5	0	|	0	19	0	||	Unmodulated	0.279138
chr18:65478449	chr18	65478449	+	UTR	||	Malt1	||	12	3	3	||	0.118687	0	0.118687	||	1	12	0.0833333	|	9	33	0.272727	|	0	21	0	||	0	16	0	|	0	16	0	|	0	23	0	||	Unmodulated	0.279138
chr6:29370511	chr6	29370511	+	Intron	||	Calu	||	7	3	3	||	0.118687	0	0.118687	||	0	10	0	|	1	12	0.0833333	|	3	11	0.272727	||	0	7	0	|	0	8	0	|	0	8	0	||	Unmodulated	0.279138
chr11:75739727	chr11	75739727	+	Intron	||	Ywhae	||	7	3	3	||	0.118556	0	0.118556	||	5	18	0.277778	|	1	60	0.0166667	|	3	49	0.0612245	||	0	7	0	|	0	20	0	|	0	17	0	||	Unmodulated	0.279319
chr8:41350315	chr8	41350315	-	Intron	||	Asah1	||	0	2	3	||	0.297619	0.0416667	0.255952	||	3	7	0.428571	|	0	0	NA	|	1	6	0.166667	||	1	8	0.125	|	0	9	0	|	0	9	0	||	Unmodulated	0.27952
chr12:105800884	chr12	105800884	+	Intron	||	Papola	||	4	2	3	||	0	0.0621118	-0.0621118	||	0	4	0	|	0	31	0	|	0	28	0	||	2	14	0.142857	|	1	23	0.0434783	|	0	15	0	||	Unmodulated	0.279562
chrX:74259000	chrX	74259000	+	Intron	||	Emd	||	1	2	2	||	0.102241	0	0.102241	||	0	2	0	|	4	17	0.235294	|	1	14	0.0714286	||	0	1	0	|	0	12	0	|	0	10	0	||	Unmodulated	0.279835
chr5:34371994	chr5	34371994	+	Intron	||	Fam193a	||	10	3	3	||	0.0915966	0.037037	0.0545596	||	1	10	0.1	|	2	35	0.0571429	|	4	34	0.117647	||	0	11	0	|	3	27	0.111111	|	0	24	0	||	Unmodulated	0.280016
chr11:102519545	chr11	102519545	-	Intron	||	Gpatch8	||	13	3	3	||	0.0138889	0.0891627	-0.0752738	||	0	13	0	|	0	59	0	|	2	48	0.0416667	||	4	21	0.190476	|	1	49	0.0204082	|	3	53	0.0566038	||	Unmodulated	0.280321
chr11:101972529	chr11	101972529	-	UTR	||	Dusp3	||	12	3	3	||	0.0899852	0	0.0899852	||	10	47	0.212766	|	1	36	0.0277778	|	1	34	0.0294118	||	0	31	0	|	0	18	0	|	0	12	0	||	Unmodulated	0.280357
chr9:70700226	chr9	70700226	+	Intron	||	Adam10	||	15	3	3	||	0.159844	0	0.159844	||	7	19	0.368421	|	0	37	0	|	2	18	0.111111	||	0	15	0	|	0	33	0	|	0	48	0	||	Unmodulated	0.280536
chr8:78619158	chr8	78619158	+	Intron	||	Slc10a7	||	5	3	3	||	0.274074	0.037037	0.237037	||	3	5	0.6	|	2	18	0.111111	|	2	18	0.111111	||	1	9	0.111111	|	0	9	0	|	0	5	0	||	Unmodulated	0.280877
chr1:84819392	chr1	84819392	-	Intron	||	Trip12	||	1	2	2	||	0.425926	0	0.425926	||	2	2	1	|	1	18	0.0555556	|	2	9	0.222222	||	0	1	0	|	0	9	0	|	0	11	0	||	Unmodulated	0.280899
chr9:72670266	chr9	72670266	+	Intron	||	Nedd4	||	10	3	3	||	0.0888889	0.272037	-0.183148	||	2	10	0.2	|	0	17	0	|	1	15	0.0666667	||	12	23	0.521739	|	5	33	0.151515	|	2	14	0.142857	||	Unmodulated	0.280972
chr17:33689826	chr17	33689826	-	Intron	||	2002-03-01	||	14	3	3	||	0.0493734	0.00483092	0.0445425	||	2	19	0.105263	|	0	50	0	|	3	70	0.0428571	||	0	14	0	|	1	69	0.0144928	|	0	92	0	||	Unmodulated	0.281036
chr11:60125943	chr11	60125943	+	Intron	||	Rai1	||	6	3	3	||	0.0577778	0	0.0577778	||	2	15	0.133333	|	0	20	0	|	1	25	0.04	||	0	6	0	|	0	16	0	|	0	16	0	||	Unmodulated	0.281098
chr10:86993891	chr10	86993891	-	Intron	||	Gm16271;Stab2	||	3	2	2	||	0	0.144444	-0.144444	||	0	4	0	|	0	9	0	|	0	5	0	||	0	10	0	|	2	20	0.1	|	1	3	0.333333	||	Unmodulated	0.281098
chr12:111607362	chr12	111607362	+	Intron	||	Mark3	||	2	3	2	||	0.0962963	0	0.0962963	||	2	9	0.222222	|	0	15	0	|	1	15	0.0666667	||	0	2	0	|	0	19	0	|	0	17	0	||	Unmodulated	0.281098
chr4:150496588	chr4	150496588	+	Intron	||	Rere	||	4	2	3	||	0	0.288889	-0.288889	||	0	4	0	|	0	5	0	|	0	14	0	||	6	9	0.666667	|	1	5	0.2	|	0	5	0	||	Unmodulated	0.281098
chr9:21682856	chr9	21682856	+	Intron	||	Smarca4	||	20	3	3	||	0.00952381	0.041358	-0.0318342	||	1	35	0.0285714	|	0	134	0	|	0	129	0	||	2	27	0.0740741	|	1	20	0.05	|	0	38	0	||	Unmodulated	0.281423
chr7:127521147	chr7	127521147	+	Intron	||	Gm42715;Srcap	||	11	3	3	||	0.121848	0.0111111	0.110736	||	6	22	0.272727	|	2	69	0.0289855	|	3	47	0.0638298	||	0	11	0	|	1	30	0.0333333	|	0	50	0	||	Unmodulated	0.281799
chr2:126891466	chr2	126891466	-	UTR	||	Sppl2a	||	5	3	3	||	0.0346032	0	0.0346032	||	0	8	0	|	1	42	0.0238095	|	2	25	0.08	||	0	6	0	|	0	5	0	|	0	13	0	||	Unmodulated	0.281946
chr5:130206192	chr5	130206192	+	Intron	||	Rabgef1	||	5	3	3	||	0.162037	0	0.162037	||	3	8	0.375	|	0	13	0	|	1	9	0.111111	||	0	5	0	|	0	16	0	|	0	11	0	||	Unmodulated	0.282419
chr10:22312033	chr10	22312033	+	Exon	||	C920009B18Rik;Raet1e	||	2	2	2	||	0.210826	0	0.210826	||	1	2	0.5	|	1	13	0.0769231	|	1	18	0.0555556	||	0	6	0	|	0	3	0	|	0	12	0	||	Unmodulated	0.282483
chr4:116539482	chr4	116539482	+	intergenic	||	NA	||	2	2	2	||	0.0664336	0	0.0664336	||	0	2	0	|	2	13	0.153846	|	1	22	0.0454545	||	0	3	0	|	0	20	0	|	0	15	0	||	Unmodulated	0.282721
chr1:86574456	chr1	86574456	-	Intron	||	Pde6d	||	5	3	3	||	0.0431373	0	0.0431373	||	0	5	0	|	1	34	0.0294118	|	2	20	0.1	||	0	6	0	|	0	24	0	|	0	16	0	||	Unmodulated	0.283201
chr17:42826928	chr17	42826928	-	Intron	||	Cd2ap	||	4	2	3	||	0	0.0862745	-0.0862745	||	0	4	0	|	0	13	0	|	0	6	0	||	3	15	0.2	|	1	17	0.0588235	|	0	11	0	||	Unmodulated	0.283201
chr19:40742500	chr19	40742500	+	intergenic	||	NA	||	5	3	3	||	0.172549	0	0.172549	||	2	5	0.4	|	2	17	0.117647	|	0	5	0	||	0	11	0	|	0	8	0	|	0	6	0	||	Unmodulated	0.283201
chr12:17353638	chr12	17353638	+	Intron	||	Nol10	||	5	3	3	||	0.199074	0.0416667	0.157407	||	2	9	0.222222	|	3	8	0.375	|	0	5	0	||	2	16	0.125	|	0	16	0	|	0	11	0	||	Unmodulated	0.283375
chr11:69757084	chr11	69757084	-	Intron	||	Polr2a	||	3	2	3	||	0.280303	0	0.280303	||	2	3	0.666667	|	1	12	0.0833333	|	1	11	0.0909091	||	0	8	0	|	0	8	0	|	0	13	0	||	Unmodulated	0.283901
chr2:152810119	chr2	152810119	-	Intron	||	Bcl2l1	||	9	3	3	||	0.115961	0	0.115961	||	7	26	0.269231	|	0	69	0	|	7	89	0.0786517	||	0	9	0	|	0	35	0	|	0	92	0	||	Unmodulated	0.283916
chr7:73489090	chr7	73489090	-	Intron	||	Chd2	||	5	3	3	||	0.0477897	0	0.0477897	||	1	9	0.111111	|	0	46	0	|	1	31	0.0322581	||	0	5	0	|	0	15	0	|	0	24	0	||	Unmodulated	0.284573
chr3:152230879	chr3	152230879	+	Exon	||	Fubp1	||	11	3	3	||	0	0.039075	-0.039075	||	0	12	0	|	0	44	0	|	0	32	0	||	1	11	0.0909091	|	1	38	0.0263158	|	0	35	0	||	Unmodulated	0.284881
chr9:106181495	chr9	106181495	+	Intron	||	Wdr82	||	5	3	3	||	0.0781499	0	0.0781499	||	0	5	0	|	6	33	0.181818	|	1	19	0.0526316	||	0	8	0	|	0	16	0	|	0	6	0	||	Unmodulated	0.284881
chr1:156039574	chr1	156039574	+	Intron	||	Tor1aip2	||	11	3	3	||	0	0.057265	-0.057265	||	0	11	0	|	0	40	0	|	0	25	0	||	2	15	0.133333	|	0	22	0	|	2	52	0.0384615	||	Unmodulated	0.285249
chr13:74644305	chr13	74644305	+	Intron	||	Erap1	||	3	2	3	||	0.286325	0	0.286325	||	0	3	0	|	5	26	0.192308	|	4	6	0.666667	||	0	10	0	|	0	6	0	|	0	14	0	||	Unmodulated	0.285249
chr11:3233662	chr11	3233662	+	Intron	||	Drg1;Eif4enif1	||	1	3	2	||	0.0373188	0	0.0373188	||	0	5	0	|	1	40	0.025	|	2	23	0.0869565	||	0	1	0	|	0	13	0	|	0	33	0	||	Unmodulated	0.2856
chr2:37415352	chr2	37415352	-	Intron	||	Rc3h2	||	4	2	3	||	0.0317836	0	0.0317836	||	0	4	0	|	1	47	0.0212766	|	2	27	0.0740741	||	0	17	0	|	0	23	0	|	0	32	0	||	Unmodulated	0.285697
chr9:58635203	chr9	58635203	+	Intron	||	Nptn	||	20	3	3	||	0.0844792	0.0166667	0.0678126	||	5	28	0.178571	|	1	34	0.0294118	|	1	22	0.0454545	||	1	20	0.05	|	0	24	0	|	0	26	0	||	Unmodulated	0.285832
chr5:24113267	chr5	24113267	+	Intron	||	Klhl7	||	4	2	2	||	0	0.107143	-0.107143	||	0	4	0	|	0	19	0	|	0	15	0	||	1	4	0.25	|	1	14	0.0714286	|	0	23	0	||	Unmodulated	0.286254
chr2:90559719	chr2	90559719	-	Intron	||	Ptprj	||	4	3	2	||	0.107143	0	0.107143	||	2	8	0.25	|	0	10	0	|	1	14	0.0714286	||	0	5	0	|	0	4	0	|	0	7	0	||	Unmodulated	0.286254
chr19:45589635	chr19	45589635	-	Intron	||	Fbxw4	||	3	3	2	||	0.428571	0	0.428571	||	5	5	1	|	2	7	0.285714	|	0	18	0	||	0	3	0	|	0	6	0	|	0	20	0	||	Unmodulated	0.286254
chr14:52293815	chr14	52293815	+	UTR	||	Tox4	||	68	3	3	||	0.0228938	0.00343643	0.0194573	||	4	80	0.05	|	1	130	0.00769231	|	1	91	0.010989	||	0	68	0	|	0	78	0	|	1	97	0.0103093	||	Unmodulated	0.286262
chr19:4766369	chr19	4766369	-	Exon	||	Gm21992;Rbm4b	||	27	3	3	||	0.0239855	0.0925471	-0.0685616	||	1	34	0.0294118	|	3	104	0.0288462	|	1	73	0.0136986	||	5	27	0.185185	|	5	76	0.0657895	|	2	75	0.0266667	||	Unmodulated	0.28638
chr7:127566793	chr7	127566793	+	UTR	||	Gm28198;Gm42715;Tmem265	||	13	3	3	||	0.0375661	0.010101	0.0274651	||	1	18	0.0555556	|	2	35	0.0571429	|	0	34	0	||	0	13	0	|	1	33	0.030303	|	0	43	0	||	Unmodulated	0.286466
chr7:97098476	chr7	97098476	+	Intron	||	Gab2	||	19	3	3	||	0.0574252	0.0151515	0.0422737	||	3	26	0.115385	|	1	39	0.025641	|	1	32	0.03125	||	0	19	0	|	2	44	0.0454545	|	0	36	0	||	Unmodulated	0.286752
chr5:65625228	chr5	65625228	-	Intron	||	Gm42729;Pds5a	||	3	2	3	||	0.306433	0.0416667	0.264766	||	2	3	0.666667	|	1	5	0.2	|	1	19	0.0526316	||	0	7	0	|	1	8	0.125	|	0	20	0	||	Unmodulated	0.286876
chr9:22242622	chr9	22242622	+	Intron	||	Zfp809	||	2	3	2	||	0.140226	0.037037	0.103189	||	3	11	0.272727	|	1	33	0.030303	|	2	17	0.117647	||	1	9	0.111111	|	0	5	0	|	0	2	0	||	Unmodulated	0.286994
chr18:31601603	chr18	31601603	-	Intron	||	Slc25a46	||	10	3	3	||	0.11655	0	0.11655	||	3	11	0.272727	|	2	26	0.0769231	|	0	14	0	||	0	10	0	|	0	24	0	|	0	18	0	||	Unmodulated	0.287602
chrX:13082867	chrX	13082867	+	Intron	||	Usp9x	||	4	2	2	||	0.030303	0.134615	-0.104312	||	0	4	0	|	0	12	0	|	2	22	0.0909091	||	1	4	0.25	|	2	13	0.153846	|	0	22	0	||	Unmodulated	0.287709
chr4:155621525	chr4	155621525	+	UTR	||	Gm10563;Gm16023;Slc35e2	||	14	3	3	||	0.149408	0	0.149408	||	5	14	0.357143	|	1	31	0.0322581	|	2	34	0.0588235	||	0	28	0	|	0	54	0	|	0	42	0	||	Unmodulated	0.287864
chr10:58406486	chr10	58406486	+	Intron	||	Lims1	||	20	3	3	||	0.134039	0.0510467	0.0829927	||	5	20	0.25	|	3	38	0.0789474	|	3	41	0.0731707	||	1	23	0.0434783	|	3	46	0.0652174	|	2	45	0.0444444	||	Unmodulated	0.288017
chr4:62344173	chr4	62344173	-	Exon	||	Fkbp15	||	11	3	3	||	0.122876	0.025641	0.0972348	||	4	17	0.235294	|	2	15	0.133333	|	0	23	0	||	1	13	0.0769231	|	0	27	0	|	0	11	0	||	Unmodulated	0.288106
chr5:34490983	chr5	34490983	+	intergenic	||	NA	||	2	2	3	||	0.0222222	0.125	-0.102778	||	0	2	0	|	0	6	0	|	1	15	0.0666667	||	0	9	0	|	3	12	0.25	|	1	8	0.125	||	Unmodulated	0.288184
chr19:8922781	chr19	8922781	+	Intron	||	B3gat3	||	4	2	2	||	0.138889	0.0333333	0.105556	||	1	4	0.25	|	0	12	0	|	1	6	0.166667	||	0	4	0	|	1	10	0.1	|	0	6	0	||	Unmodulated	0.288218
chrX:7862929	chrX	7862929	+	Intron	||	Otud5	||	2	2	2	||	0.277778	0.0666667	0.211111	||	2	6	0.333333	|	0	11	0	|	1	2	0.5	||	1	5	0.2	|	0	2	0	|	0	8	0	||	Unmodulated	0.288218
chr15:66637609	chr15	66637609	+	Intron	||	Phf20l1	||	38	3	3	||	0.0659015	0	0.0659015	||	6	38	0.157895	|	2	99	0.020202	|	1	51	0.0196078	||	0	39	0	|	0	46	0	|	0	50	0	||	Unmodulated	0.288307
chr2:126803776	chr2	126803776	-	Intron	||	Trpm7	||	6	3	3	||	0.126389	0.0357143	0.0906746	||	3	12	0.25	|	1	16	0.0625	|	1	15	0.0666667	||	0	6	0	|	3	28	0.107143	|	0	21	0	||	Unmodulated	0.288511
chr10:83577002	chr10	83577002	+	Intron	||	Washc4	||	1	2	3	||	0.111111	0.030303	0.0808081	||	0	1	0	|	3	18	0.166667	|	4	24	0.166667	||	0	5	0	|	1	11	0.0909091	|	0	9	0	||	Unmodulated	0.289044
chr2:49141873	chr2	49141873	+	Intron	||	Mbd5	||	4	3	2	||	0.255556	0	0.255556	||	3	5	0.6	|	1	6	0.166667	|	0	7	0	||	0	5	0	|	0	5	0	|	0	4	0	||	Unmodulated	0.289188
chr1:87891577	chr1	87891577	+	Intron	||	Dgkd	||	13	3	3	||	0.0851852	0	0.0851852	||	6	30	0.2	|	5	90	0.0555556	|	0	44	0	||	0	13	0	|	0	24	0	|	0	21	0	||	Unmodulated	0.289188
chr5:34387359	chr5	34387359	+	Intron	||	Fam193a	||	8	3	3	||	0.018018	0.30609	-0.288072	||	0	8	0	|	2	37	0.0540541	|	0	20	0	||	11	16	0.6875	|	3	13	0.230769	|	0	27	0	||	Unmodulated	0.289528
chrX:134321130	chrX	134321130	+	Intron	||	Cenpi	||	6	3	3	||	0.0238095	0.0847042	-0.0608947	||	0	7	0	|	1	14	0.0714286	|	0	15	0	||	1	6	0.166667	|	1	33	0.030303	|	2	35	0.0571429	||	Unmodulated	0.289721
chr5:129985451	chr5	129985451	+	intergenic	||	Vkorc1l1	||	21	3	3	||	0	0.0810359	-0.0810359	||	0	30	0	|	0	49	0	|	0	25	0	||	4	21	0.190476	|	0	33	0	|	2	38	0.0526316	||	Unmodulated	0.289735
chr14:31700662	chr14	31700662	-	UTR	||	Ankrd28	||	53	3	3	||	0.242697	0.115366	0.127331	||	22	53	0.415094	|	15	78	0.192308	|	7	58	0.12069	||	14	75	0.186667	|	9	73	0.123288	|	3	83	0.0361446	||	Unmodulated	0.290219
chr4:40850143	chr4	40850143	-	Intron	||	B4galt1	||	8	3	3	||	0.0238095	0.0998217	-0.0760122	||	0	8	0	|	0	12	0	|	1	14	0.0714286	||	2	11	0.181818	|	2	17	0.117647	|	0	29	0	||	Unmodulated	0.290221
chr16:18436880	chr16	18436880	+	Intron	||	Txnrd2	||	17	3	3	||	0.0386364	0	0.0386364	||	2	22	0.0909091	|	0	45	0	|	1	40	0.025	||	0	29	0	|	0	17	0	|	0	37	0	||	Unmodulated	0.290228
chr7:126790601	chr7	126790601	-	Intron	||	Ppp4c	||	2	2	3	||	0.418519	0	0.418519	||	2	2	1	|	1	18	0.0555556	|	3	15	0.2	||	0	9	0	|	0	11	0	|	0	28	0	||	Unmodulated	0.290234
chr11:43693703	chr11	43693703	+	Intron	||	Pwwp2a	||	3	3	2	||	0.141414	0	0.141414	||	4	12	0.333333	|	0	9	0	|	1	11	0.0909091	||	0	3	0	|	0	20	0	|	0	23	0	||	Unmodulated	0.291082
chr6:35093302	chr6	35093302	-	Intron	||	Cnot4	||	4	2	3	||	0	0.0707071	-0.0707071	||	0	4	0	|	0	18	0	|	0	14	0	||	1	6	0.166667	|	2	44	0.0454545	|	0	16	0	||	Unmodulated	0.291082
chr12:111651598	chr12	111651598	+	Intron	||	Mark3	||	4	2	3	||	0.0128205	0.0473802	-0.0345596	||	0	4	0	|	0	48	0	|	1	26	0.0384615	||	1	13	0.0769231	|	3	46	0.0652174	|	0	35	0	||	Unmodulated	0.2911
chr4:150346390	chr4	150346390	+	Intron	||	Rere	||	4	2	2	||	0.268519	0.0416667	0.226852	||	1	4	0.25	|	0	22	0	|	5	9	0.555556	||	0	4	0	|	1	8	0.125	|	0	6	0	||	Unmodulated	0.291353
chr13:55558846	chr13	55558846	-	Intron	||	Fam193b	||	7	3	3	||	0.0185185	0.0779221	-0.0594036	||	0	7	0	|	2	36	0.0555556	|	0	19	0	||	1	7	0.142857	|	0	7	0	|	1	11	0.0909091	||	Unmodulated	0.291381
chr13:98793083	chr13	98793083	-	Intron	||	Fcho2	||	5	3	3	||	0.105128	0.035742	0.0693862	||	1	5	0.2	|	1	26	0.0384615	|	3	39	0.0769231	||	1	13	0.0769231	|	1	33	0.030303	|	0	35	0	||	Unmodulated	0.29174
chr19:45769069	chr19	45769069	-	Intron	||	Mgea5	||	11	3	3	||	0.00740741	0.0280681	-0.0206607	||	0	11	0	|	0	43	0	|	1	45	0.0222222	||	1	21	0.047619	|	3	82	0.0365854	|	0	83	0	||	Unmodulated	0.291893
chr18:64477299	chr18	64477299	-	Intron	||	Fech	||	21	3	3	||	0.133644	0.031746	0.101898	||	6	22	0.272727	|	3	91	0.032967	|	6	63	0.0952381	||	2	21	0.0952381	|	0	37	0	|	0	135	0	||	Unmodulated	0.292475
chr16:32300229	chr16	32300229	+	UTR	||	Rnf168	||	42	3	3	||	0.0690359	0	0.0690359	||	1	48	0.0208333	|	1	51	0.0196078	|	7	42	0.166667	||	0	90	0	|	0	58	0	|	0	68	0	||	Unmodulated	0.292899
chr9:107765789	chr9	107765789	-	Intron	||	Rbm5	||	11	3	3	||	0.0452381	0	0.0452381	||	0	11	0	|	1	35	0.0285714	|	3	28	0.107143	||	0	13	0	|	0	19	0	|	0	18	0	||	Unmodulated	0.293382
chr17:21989380	chr17	21989380	+	Intron	||	Zfp943	||	9	3	3	||	0	0.105556	-0.105556	||	0	9	0	|	0	24	0	|	0	16	0	||	4	16	0.25	|	0	14	0	|	1	15	0.0666667	||	Unmodulated	0.293382
chr2:152325826	chr2	152325826	-	Intron	||	Rbck1	||	8	3	3	||	0.158333	0	0.158333	||	6	16	0.375	|	0	35	0	|	2	20	0.1	||	0	8	0	|	0	22	0	|	0	26	0	||	Unmodulated	0.293382
chr16:31178520	chr16	31178520	-	Intron	||	Acap2	||	5	3	3	||	0	0.175926	-0.175926	||	0	5	0	|	0	13	0	|	0	10	0	||	5	12	0.416667	|	0	6	0	|	1	9	0.111111	||	Unmodulated	0.293382
chr8:25723197	chr8	25723197	+	Intron	||	Plpp5	||	7	3	3	||	0.283425	0.0809524	0.202473	||	4	7	0.571429	|	2	16	0.125	|	2	13	0.153846	||	2	14	0.142857	|	1	10	0.1	|	0	18	0	||	Unmodulated	0.293513
chr4:129320136	chr4	129320136	-	Intron	||	Rbbp4	||	14	3	3	||	0.0225989	0.109524	-0.0869249	||	0	16	0	|	4	59	0.0677966	|	0	45	0	||	3	14	0.214286	|	4	35	0.114286	|	0	54	0	||	Unmodulated	0.294072
chr9:107819337	chr9	107819337	-	Exon	||	Gm37436;Rbm6	||	25	3	3	||	0.0345622	0.00564972	0.0289125	||	2	28	0.0714286	|	2	62	0.0322581	|	0	65	0	||	0	25	0	|	1	59	0.0169492	|	0	62	0	||	Unmodulated	0.294493
chr10:83122887	chr10	83122887	+	Intron	||	Chst11	||	0	2	3	||	0	0.168421	-0.168421	||	0	0	NA	|	0	7	0	|	0	15	0	||	2	5	0.4	|	0	13	0	|	2	19	0.105263	||	Unmodulated	0.294727
chr4:155716520	chr4	155716520	+	Exon	||	Ssu72	||	15	3	3	||	0.0561404	0	0.0561404	||	2	15	0.133333	|	0	85	0	|	2	57	0.0350877	||	0	33	0	|	0	44	0	|	0	39	0	||	Unmodulated	0.294727
chr3:95212031	chr3	95212031	-	Intron	||	Gabpb2	||	4	2	3	||	0	0.0842105	-0.0842105	||	0	4	0	|	0	22	0	|	0	30	0	||	1	5	0.2	|	0	20	0	|	2	38	0.0526316	||	Unmodulated	0.294727
chr18:56957002	chr18	56957002	-	UTR	||	C330018D20Rik	||	10	3	3	||	0.0842105	0	0.0842105	||	3	15	0.2	|	0	20	0	|	1	19	0.0526316	||	0	10	0	|	0	11	0	|	0	16	0	||	Unmodulated	0.294727
chr15:93306273	chr15	93306273	-	Intron	||	Yaf2	||	0	2	2	||	0.222222	0	0.222222	||	0	0	NA	|	1	9	0.111111	|	2	6	0.333333	||	0	0	NA	|	0	9	0	|	0	5	0	||	Unmodulated	0.295167
chr3:95089944	chr3	95089944	-	Intron	||	Pip5k1a	||	5	3	3	||	0.363636	0.0555556	0.308081	||	4	5	0.8	|	2	22	0.0909091	|	3	15	0.2	||	0	8	0	|	2	12	0.166667	|	0	6	0	||	Unmodulated	0.295208
chr3:69095934	chr3	69095934	-	Intron	||	Kpna4	||	2	2	2	||	0.275931	0	0.275931	||	2	3	0.666667	|	1	23	0.0434783	|	2	17	0.117647	||	0	2	0	|	0	24	0	|	0	10	0	||	Unmodulated	0.295471
chr3:69095937	chr3	69095937	-	Intron	||	Kpna4	||	2	2	2	||	0.275931	0	0.275931	||	2	3	0.666667	|	1	23	0.0434783	|	2	17	0.117647	||	0	2	0	|	0	24	0	|	0	9	0	||	Unmodulated	0.295471
chr5:145092800	chr5	145092800	+	Intron	||	Arpc1a	||	3	2	2	||	0.0416667	0.177778	-0.136111	||	0	4	0	|	1	8	0.125	|	0	10	0	||	2	6	0.333333	|	1	5	0.2	|	0	3	0	||	Unmodulated	0.29568
chr4:59531715	chr4	59531715	-	Intron	||	Ptbp3	||	35	3	3	||	0.0524906	0.00347222	0.0490184	||	5	41	0.121951	|	1	98	0.0102041	|	2	79	0.0253165	||	0	35	0	|	0	94	0	|	1	96	0.0104167	||	Unmodulated	0.295895
chr11:82860299	chr11	82860299	-	Intron	||	Rffl	||	1	3	2	||	0.0646154	0	0.0646154	||	0	14	0	|	1	25	0.04	|	2	13	0.153846	||	0	1	0	|	0	23	0	|	0	18	0	||	Unmodulated	0.295947
chr7:28336230	chr7	28336230	-	Intron	||	Supt5	||	3	3	2	||	0.142857	0.0277778	0.115079	||	2	7	0.285714	|	2	14	0.142857	|	0	13	0	||	0	3	0	|	1	12	0.0833333	|	0	11	0	||	Unmodulated	0.296048
chrX:151825585	chrX	151825585	+	Intron	||	Huwe1	||	4	3	2	||	0.179894	0	0.179894	||	3	7	0.428571	|	1	9	0.111111	|	0	7	0	||	0	4	0	|	0	14	0	|	0	7	0	||	Unmodulated	0.296234
chr15:98815557	chr15	98815557	-	Exon	||	B130046B21Rik;Prkag1	||	7	3	3	||	0.204132	0.0454545	0.158677	||	3	7	0.428571	|	1	8	0.125	|	1	17	0.0588235	||	1	11	0.0909091	|	1	22	0.0454545	|	0	30	0	||	Unmodulated	0.296287
chr3:104833462	chr3	104833462	-	Intron	||	Capza1	||	12	3	3	||	0.0989247	0.0185185	0.0804062	||	4	20	0.2	|	3	31	0.0967742	|	0	17	0	||	1	18	0.0555556	|	0	20	0	|	0	12	0	||	Unmodulated	0.296651
chr19:61119457	chr19	61119457	-	Exon	||	Zfp950	||	11	3	3	||	0.0524194	0	0.0524194	||	2	16	0.125	|	0	36	0	|	1	31	0.0322581	||	0	11	0	|	0	30	0	|	0	31	0	||	Unmodulated	0.296698
chr7:127524926	chr7	127524926	+	Intron	||	Gm42715;Srcap	||	3	3	2	||	0.1	0.0196078	0.0803922	||	3	15	0.2	|	0	37	0	|	2	20	0.1	||	0	3	0	|	1	17	0.0588235	|	0	22	0	||	Unmodulated	0.29685
chr9:18314323	chr9	18314323	+	intergenic	||	Chordc1	||	9	3	3	||	0.0931217	0	0.0931217	||	0	21	0	|	2	35	0.0571429	|	2	9	0.222222	||	0	11	0	|	0	16	0	|	0	10	0	||	Unmodulated	0.297056
chr11:78680618	chr11	78680618	-	Intron	||	Nlk	||	5	3	3	||	0.152778	0.0175439	0.135234	||	3	9	0.333333	|	4	32	0.125	|	0	24	0	||	0	5	0	|	1	19	0.0526316	|	0	11	0	||	Unmodulated	0.297501
chr17:12972011	chr17	12972011	-	Intron	||	Wtap	||	12	3	3	||	0	0.038055	-0.038055	||	0	12	0	|	0	56	0	|	0	56	0	||	2	22	0.0909091	|	1	43	0.0232558	|	0	27	0	||	Unmodulated	0.297575
chr12:85617491	chr12	85617491	+	Intron	||	Jdp2	||	5	3	3	||	0.390476	0.541667	-0.15119	||	1	5	0.2	|	6	15	0.4	|	8	14	0.571429	||	4	9	0.444444	|	5	9	0.555556	|	5	8	0.625	||	Unmodulated	0.297737
chr4:154967007	chr4	154967007	+	Intron	||	Pank4	||	3	2	3	||	0.0350877	0.150794	-0.115706	||	0	3	0	|	0	12	0	|	2	19	0.105263	||	2	12	0.166667	|	2	7	0.285714	|	0	16	0	||	Unmodulated	0.29784
chr15:81456904	chr15	81456904	+	intergenic	||	NA	||	3	3	2	||	0.117143	0	0.117143	||	1	14	0.0714286	|	7	25	0.28	|	0	7	0	||	0	13	0	|	0	3	0	|	0	12	0	||	Unmodulated	0.297853
chr7:59234200	chr7	59234200	+	Intron	||	9330162G02Rik;Ube3a	||	4	3	2	||	0.156746	0	0.156746	||	3	8	0.375	|	2	21	0.0952381	|	0	12	0	||	0	4	0	|	0	24	0	|	0	12	0	||	Unmodulated	0.298297
chr17:24406414	chr17	24406414	-	Intron	||	Abca3;D330041H03Rik	||	9	3	3	||	0.20672	0.037037	0.169683	||	4	9	0.444444	|	7	50	0.14	|	1	28	0.0357143	||	2	18	0.111111	|	0	18	0	|	0	31	0	||	Unmodulated	0.29885
chr2:18382047	chr2	18382047	-	Intron	||	Dnajc1	||	4	2	3	||	0.047619	0.321429	-0.27381	||	0	4	0	|	0	8	0	|	1	7	0.142857	||	5	7	0.714286	|	2	12	0.166667	|	1	12	0.0833333	||	Unmodulated	0.29896
chr11:106655124	chr11	106655124	-	UTR	||	Pecam1	||	44	3	3	||	0.677931	0.44851	0.229422	||	72	126	0.571429	|	111	111	1	|	43	93	0.462366	||	33	61	0.540984	|	28	55	0.509091	|	13	44	0.295455	||	Unmodulated	0.299491
chr7:130489400	chr7	130489400	-	Intron	||	Ate1;Fgfr2	||	4	3	2	||	0.282997	0.159655	0.123341	||	5	11	0.454545	|	5	25	0.2	|	7	36	0.194444	||	1	4	0.25	|	8	50	0.16	|	2	29	0.0689655	||	Unmodulated	0.299719
chr6:60785549	chr6	60785549	-	Intron	||	Snca	||	45	3	3	||	0.0205472	0.002331	0.0182162	||	0	45	0	|	2	121	0.0165289	|	6	133	0.0451128	||	0	62	0	|	0	97	0	|	1	143	0.00699301	||	Unmodulated	0.299777
chr2:48896119	chr2	48896119	-	Intron	||	Acvr2a	||	5	3	3	||	0.138889	0	0.138889	||	2	6	0.333333	|	0	14	0	|	1	12	0.0833333	||	0	5	0	|	0	26	0	|	0	10	0	||	Unmodulated	0.29986
chr11:52123627	chr11	52123627	+	UTR	||	Gm26551;Ppp2ca	||	3	2	2	||	0.277778	0	0.277778	||	3	18	0.166667	|	2	3	0.666667	|	0	12	0	||	0	3	0	|	0	11	0	|	0	16	0	||	Unmodulated	0.29986
chr4:136564742	chr4	136564742	+	Intron	||	Kdm1a	||	3	2	2	||	0.277778	0	0.277778	||	2	3	0.666667	|	0	15	0	|	1	6	0.166667	||	0	3	0	|	0	12	0	|	0	7	0	||	Unmodulated	0.29986
chr3:95469775	chr3	95469775	+	Intron	||	Arnt	||	6	3	3	||	0	0.0416667	-0.0416667	||	0	6	0	|	0	38	0	|	0	22	0	||	1	10	0.1	|	1	40	0.025	|	0	19	0	||	Unmodulated	0.29986
chr6:72376356	chr6	72376356	-	Intron	||	Vamp5	||	7	3	3	||	0.0595238	0	0.0595238	||	1	7	0.142857	|	0	25	0	|	1	28	0.0357143	||	0	9	0	|	0	42	0	|	0	28	0	||	Unmodulated	0.29986
chr17:36005338	chr17	36005338	-	Intron	||	A930015D03Rik	||	14	3	3	||	0.0961538	0	0.0961538	||	0	14	0	|	3	52	0.0576923	|	6	26	0.230769	||	0	29	0	|	0	44	0	|	0	49	0	||	Unmodulated	0.29986
chr16:18338121	chr16	18338121	-	Intron	||	Tango2	||	5	3	3	||	0.104167	0	0.104167	||	2	8	0.25	|	1	16	0.0625	|	0	10	0	||	0	5	0	|	0	14	0	|	0	24	0	||	Unmodulated	0.29986
chr13:17775346	chr13	17775346	-	Intron	||	Cdk13	||	4	2	3	||	0.119048	0	0.119048	||	2	7	0.285714	|	1	14	0.0714286	|	0	4	0	||	0	7	0	|	0	14	0	|	0	6	0	||	Unmodulated	0.29986
chr1:36880259	chr1	36880259	-	Intron	||	Tmem131	||	7	3	3	||	0.119048	0	0.119048	||	2	7	0.285714	|	2	28	0.0714286	|	0	27	0	||	0	9	0	|	0	29	0	|	0	33	0	||	Unmodulated	0.29986
chrX:60375511	chrX	60375511	-	Intron	||	Atp11c	||	5	3	3	||	0.119048	0	0.119048	||	2	7	0.285714	|	0	37	0	|	1	14	0.0714286	||	0	5	0	|	0	11	0	|	0	18	0	||	Unmodulated	0.29986
chr8:40498350	chr8	40498350	-	Intron	||	Cnot7;Zdhhc2	||	0	2	2	||	0.208333	0	0.208333	||	1	2	0.5	|	1	8	0.125	|	0	5	0	||	0	0	NA	|	0	5	0	|	0	9	0	||	Unmodulated	0.29986
chr2:18199399	chr2	18199399	+	Intron	||	Dnajc1;Mllt10	||	4	2	2	||	0.208333	0	0.208333	||	2	4	0.5	|	1	8	0.125	|	0	13	0	||	0	4	0	|	0	6	0	|	0	6	0	||	Unmodulated	0.29986
chr12:3244983	chr12	3244983	+	Intron	||	Rab10os	||	1	2	3	||	0.416667	0	0.416667	||	1	1	1	|	2	8	0.25	|	0	7	0	||	0	5	0	|	0	13	0	|	0	11	0	||	Unmodulated	0.29986
chr11:74696860	chr11	74696860	-	Intron	||	Pafah1b1	||	7	3	3	||	0.116947	0	0.116947	||	2	7	0.285714	|	2	68	0.0294118	|	1	28	0.0357143	||	0	13	0	|	0	32	0	|	0	25	0	||	Unmodulated	0.300164
chr16:35926902	chr16	35926902	-	UTR	||	Dtx3l	||	27	3	3	||	0.107925	0	0.107925	||	7	27	0.259259	|	0	38	0	|	2	31	0.0645161	||	0	30	0	|	0	27	0	|	0	33	0	||	Unmodulated	0.300316
chr1:10031028	chr1	10031028	-	Exon	||	Cops5	||	9	3	3	||	0.181818	0.037037	0.144781	||	4	11	0.363636	|	0	10	0	|	2	11	0.181818	||	1	9	0.111111	|	0	13	0	|	0	20	0	||	Unmodulated	0.300663
chr19:4359657	chr19	4359657	-	Intron	||	Kdm2a	||	5	3	3	||	0.0166667	0.116667	-0.1	||	0	5	0	|	0	21	0	|	1	20	0.05	||	2	8	0.25	|	1	10	0.1	|	0	10	0	||	Unmodulated	0.300922
chr19:4359658	chr19	4359658	-	Intron	||	Kdm2a	||	5	3	3	||	0.0166667	0.116667	-0.1	||	0	5	0	|	0	21	0	|	1	20	0.05	||	2	8	0.25	|	1	10	0.1	|	0	9	0	||	Unmodulated	0.300922
chr12:110772424	chr12	110772424	+	Intron	||	Wdr20	||	2	2	2	||	0.436508	0.166667	0.269841	||	3	6	0.5	|	2	14	0.142857	|	2	3	0.666667	||	1	2	0.5	|	0	7	0	|	0	12	0	||	Unmodulated	0.301135
chr14:52089754	chr14	52089754	-	Intron	||	Hnrnpc	||	8	3	3	||	0.0238095	0.0826939	-0.0588844	||	0	8	0	|	2	28	0.0714286	|	0	20	0	||	2	17	0.117647	|	0	16	0	|	3	23	0.130435	||	Unmodulated	0.301531
chr17:27764692	chr17	27764692	-	Intron	||	D17Wsu92e	||	17	3	3	||	0	0.0319303	-0.0319303	||	0	17	0	|	0	35	0	|	0	32	0	||	2	26	0.0769231	|	0	22	0	|	1	53	0.0188679	||	Unmodulated	0.301734
chr7:97130261	chr7	97130261	+	Intron	||	Gab2	||	7	3	3	||	0.0793651	0.0208333	0.0585317	||	1	7	0.142857	|	2	21	0.0952381	|	0	9	0	||	0	15	0	|	1	16	0.0625	|	0	11	0	||	Unmodulated	0.30234
chr4:116577481	chr4	116577481	+	Intron	||	Gpbp1l1	||	12	3	3	||	0.00537634	0.0252137	-0.0198373	||	0	12	0	|	1	62	0.016129	|	0	47	0	||	1	20	0.05	|	0	48	0	|	1	39	0.025641	||	Unmodulated	0.302452
chr15:79907547	chr15	79907547	+	UTR	||	Apobec3	||	64	3	3	||	0.0799101	0.0284455	0.0514646	||	22	146	0.150685	|	3	129	0.0232558	|	10	152	0.0657895	||	0	92	0	|	3	64	0.046875	|	4	104	0.0384615	||	Unmodulated	0.302847
chr8:25762325	chr8	25762325	-	Intron	||	Gm17484	||	0	2	2	||	0.155303	0	0.155303	||	3	8	0.375	|	1	11	0.0909091	|	0	1	0	||	0	0	NA	|	0	8	0	|	0	5	0	||	Unmodulated	0.302878
chr2:152325819	chr2	152325819	-	Intron	||	Rbck1	||	9	3	3	||	0.150155	0	0.150155	||	7	19	0.368421	|	1	34	0.0294118	|	1	19	0.0526316	||	0	9	0	|	0	23	0	|	0	27	0	||	Unmodulated	0.303347
chr4:154020189	chr4	154020189	+	UTR	||	Lrrc47	||	12	3	3	||	0	0.036504	-0.036504	||	0	12	0	|	0	14	0	|	0	31	0	||	0	22	0	|	3	34	0.0882353	|	1	47	0.0212766	||	Unmodulated	0.303397
chr19:8711297	chr19	8711297	-	Intron	||	Slc3a2	||	24	3	3	||	0.0983047	0	0.0983047	||	7	29	0.241379	|	2	62	0.0322581	|	1	47	0.0212766	||	0	25	0	|	0	24	0	|	0	41	0	||	Unmodulated	0.303471
chr5:30671018	chr5	30671018	+	Intron	||	Cenpa	||	8	3	3	||	0.101768	0	0.101768	||	2	8	0.25	|	1	33	0.030303	|	1	40	0.025	||	0	19	0	|	0	21	0	|	0	29	0	||	Unmodulated	0.30348
chr5:108071377	chr5	108071377	+	Intron	||	Mtf2	||	6	3	3	||	0	0.0636277	-0.0636277	||	0	6	0	|	0	57	0	|	0	43	0	||	4	26	0.153846	|	0	38	0	|	2	54	0.037037	||	Unmodulated	0.303555
chr1:66733679	chr1	66733679	-	Intron	||	Kansl1l	||	19	3	3	||	0.0581867	0	0.0581867	||	4	28	0.142857	|	1	92	0.0108696	|	1	48	0.0208333	||	0	19	0	|	0	23	0	|	0	36	0	||	Unmodulated	0.303878
chr4:145538123	chr4	145538123	+	Exon	||	Zfp990	||	0	2	2	||	0.0283019	0.110197	-0.0818955	||	0	27	0	|	0	0	NA	|	3	53	0.0566038	||	6	38	0.157895	|	0	0	NA	|	2	32	0.0625	||	Unmodulated	0.303938
chr7:142055979	chr7	142055979	-	Intron	||	Mob2	||	6	3	3	||	0.0484127	0.0107527	0.03766	||	0	9	0	|	2	21	0.0952381	|	1	20	0.05	||	0	6	0	|	1	31	0.0322581	|	0	49	0	||	Unmodulated	0.304339
[truncated: 2,367 more rows]

## Sheet: Liver-Adar KO
Editing Site (ES)	Chromosome	Position	Strand	Annotation	||	HostGene(s)	||	Min Coverage Across 6 Samples	No. of WT Samples with Coverage>=5	No. of KO Samples with Coverage>=5	||	Mean Editing Levels - WT	Mean Editing Levels - KO	WT-KO (>0 : Decreases in Mutant & <0 : Increases in Mutant)	||	WT1-Edited Reads	WT1-Total Reads	WT1-Editing Levels	|	WT2-Edited Reads	WT2-Total Reads	WT2-Editing Levels	|	WT3-Edited Reads	WT3-Total Reads	WT3-Editing Levels	||	KO1-Edited Reads	KO1-Total Reads	KO1-Editing Levels	|	KO2-Edited Reads	KO2-Total Reads	KO2-Editing Levels	|	KO3-Edited Reads	KO3-Total Reads	KO3-Editing Levels	||	Differential Editing Classification	Welch t-test p-Value
chr7:128721513	chr7	128721513	-	Intron	||	Gm44673;Mcmbp	||	0	2	2	||	0	0.664021	-0.664021	||	0	7	0	|	0	0	NA	|	0	13	0	||	7	9	0.777778	|	3	14	0.214286	|	4	4	1	||	Differentially Edited	0.104866
chr2:146393380	chr2	146393380	-	Intron	||	Ralgapa2	||	3	3	2	||	0	0.550926	-0.550926	||	0	6	0	|	0	5	0	|	0	7	0	||	7	8	0.875	|	4	9	0.444444	|	1	3	0.333333	||	Differentially Edited	0.0793433
chr8:84205057	chr8	84205057	+	intergenic	||	NA	||	4	2	2	||	0	0.411111	-0.411111	||	0	5	0	|	0	6	0	|	0	4	0	||	2	5	0.4	|	2	6	0.333333	|	2	4	0.5	||	Differentially Edited	0.0135963
chr10:86995811	chr10	86995811	-	Intron	||	Gm16271;Stab2	||	5	3	3	||	0	0.369048	-0.369048	||	0	5	0	|	0	6	0	|	0	15	0	||	2	8	0.25	|	4	7	0.571429	|	2	7	0.285714	||	Differentially Edited	0.0682747
chrX:152766432	chrX	152766432	-	Intron	||	Shroom2	||	2	2	2	||	0	0.344444	-0.344444	||	0	4	0	|	0	11	0	|	0	12	0	||	1	5	0.2	|	2	6	0.333333	|	1	2	0.5	||	Differentially Edited	0.0580075
chr7:127566793	chr7	127566793	+	UTR	||	Gm28198;Gm42715;Tmem265	||	2	2	3	||	0.0740741	0.302646	-0.228571	||	0	2	0	|	4	18	0.222222	|	0	6	0	||	4	10	0.4	|	4	14	0.285714	|	2	9	0.222222	||	Differentially Edited	0.0721261
chr7:97098462	chr7	97098462	+	Intron	||	Gab2	||	0	2	3	||	0	0.201282	-0.201282	||	0	0	NA	|	0	14	0	|	0	6	0	||	2	10	0.2	|	2	8	0.25	|	4	26	0.153846	||	Differentially Edited	0.0185008
chr13:24958491	chr13	24958491	+	Intron	||	Gpld1	||	4	2	2	||	0	0.183333	-0.183333	||	0	4	0	|	0	6	0	|	0	10	0	||	4	20	0.2	|	1	10	0.1	|	1	4	0.25	||	Differentially Edited	0.0532707
chr14:21140363	chr14	21140363	+	Intron	||	Adk	||	5	3	3	||	0	0.174603	-0.174603	||	0	5	0	|	0	30	0	|	0	81	0	||	4	21	0.190476	|	3	18	0.166667	|	2	12	0.166667	||	Differentially Edited	0.00205973
chr10:53368507	chr10	53368507	-	Intron	||	Cep85l	||	9	3	3	||	0	0.150145	-0.150145	||	0	9	0	|	0	9	0	|	0	62	0	||	3	23	0.130435	|	3	25	0.12	|	2	10	0.2	||	Differentially Edited	0.0268452
chr14:14118473	chr14	14118473	-	Intron	||	Psmd6	||	1	2	3	||	0	0.143939	-0.143939	||	0	1	0	|	0	5	0	|	0	21	0	||	2	11	0.181818	|	2	12	0.166667	|	2	24	0.0833333	||	Differentially Edited	0.0423887
chr4:45874363	chr4	45874363	+	Exon	||	Stra6l	||	4	2	3	||	0.00584795	0.14602	-0.140172	||	0	4	0	|	0	11	0	|	1	57	0.0175439	||	9	43	0.209302	|	2	17	0.117647	|	1	9	0.111111	||	Differentially Edited	0.0435017
chr9:36790266	chr9	36790266	-	Exon	||	Ei24	||	0	2	2	||	0	0.126984	-0.126984	||	0	2	0	|	0	9	0	|	0	12	0	||	1	7	0.142857	|	1	9	0.111111	|	0	0	NA	||	Differentially Edited	0.0791668
chr17:55865816	chr17	55865816	-	Exon	||	Zfp119a	||	4	2	3	||	0	0.12056	-0.12056	||	0	8	0	|	0	4	0	|	0	19	0	||	2	14	0.142857	|	4	25	0.16	|	1	17	0.0588235	||	Differentially Edited	0.0611399
chr2:163467539	chr2	163467539	-	UTR	||	Fitm2	||	12	3	3	||	0.0347222	0.145718	-0.110996	||	0	14	0	|	0	23	0	|	5	48	0.104167	||	6	28	0.214286	|	6	43	0.139535	|	1	12	0.0833333	||	Differentially Edited	0.0975813
chr19:4766369	chr19	4766369	-	Exon	||	Gm21992;Rbm4b	||	2	2	3	||	0	0.109835	-0.109835	||	0	6	0	|	0	2	0	|	0	10	0	||	2	19	0.105263	|	2	15	0.133333	|	1	11	0.0909091	||	Differentially Edited	0.0126228
chr11:75300630	chr11	75300630	-	UTR	||	Rpa1	||	40	3	3	||	0.00833333	0.0988178	-0.0904845	||	1	40	0.025	|	0	74	0	|	0	101	0	||	7	59	0.118644	|	5	57	0.0877193	|	10	111	0.0900901	||	Differentially Edited	0.00247772
chr11:75177459	chr11	75177459	-	UTR	||	1700016P03Rik;Ovca2	||	11	3	3	||	0.0215054	0.0983519	-0.0768466	||	0	23	0	|	2	31	0.0645161	|	0	36	0	||	5	33	0.151515	|	1	11	0.0909091	|	2	38	0.0526316	||	Differentially Edited	0.104767
chr11:75300631	chr11	75300631	-	UTR	||	Rpa1	||	39	3	3	||	0.0460492	0.110383	-0.0643333	||	3	39	0.0769231	|	0	72	0	|	6	98	0.0612245	||	8	61	0.131148	|	5	55	0.0909091	|	12	110	0.109091	||	Differentially Edited	0.093293
chr11:80179600	chr11	80179600	+	intergenic	||	NA	||	49	3	3	||	0.0198521	0	0.0198521	||	1	98	0.0102041	|	2	62	0.0322581	|	2	117	0.017094	||	0	88	0	|	0	49	0	|	0	57	0	||	Differentially Edited	0.0929085
chr11:77534495	chr11	77534495	-	UTR	||	Abhd15;Taok1	||	31	3	3	||	0.0247155	0	0.0247155	||	1	31	0.0322581	|	1	94	0.0106383	|	3	96	0.03125	||	0	71	0	|	0	55	0	|	0	63	0	||	Differentially Edited	0.0725149
chr4:49376156	chr4	49376156	-	intergenic	||	NA	||	10	3	3	||	0.0304172	0	0.0304172	||	1	73	0.0136986	|	3	91	0.032967	|	7	157	0.044586	||	0	54	0	|	0	10	0	|	0	58	0	||	Differentially Edited	0.0776149
chr10:87931707	chr10	87931707	+	UTR	||	Igf1	||	63	3	3	||	0.0319783	0	0.0319783	||	16	344	0.0465116	|	11	665	0.0165414	|	34	1034	0.032882	||	0	195	0	|	0	109	0	|	0	63	0	||	Differentially Edited	0.0661917
chr2:126891470	chr2	126891470	-	UTR	||	Sppl2a	||	22	3	3	||	0.0327681	0	0.0327681	||	2	47	0.0425532	|	1	24	0.0416667	|	1	71	0.0140845	||	0	40	0	|	0	22	0	|	0	23	0	||	Differentially Edited	0.0725911
chr17:13020010	chr17	13020010	+	intergenic	||	NA	||	22	3	3	||	0.043682	0.00793651	0.0357455	||	1	22	0.0454545	|	2	68	0.0294118	|	5	89	0.0561798	||	0	51	0	|	0	63	0	|	2	84	0.0238095	||	Differentially Edited	0.0323995
chr8:72482552	chr8	72482552	-	UTR	||	Slc35e1	||	25	3	3	||	0.0374074	0	0.0374074	||	1	36	0.0277778	|	1	25	0.04	|	2	45	0.0444444	||	0	44	0	|	0	43	0	|	0	33	0	||	Differentially Edited	0.0172847
chr3:58590823	chr3	58590823	+	UTR	||	Selenot	||	181	3	3	||	0.038868	0	0.038868	||	11	279	0.0394265	|	21	408	0.0514706	|	10	389	0.0257069	||	0	276	0	|	0	181	0	|	0	328	0	||	Differentially Edited	0.034765
chr11:80179646	chr11	80179646	+	intergenic	||	NA	||	49	3	3	||	0.0395519	0	0.0395519	||	6	121	0.0495868	|	1	74	0.0135135	|	7	126	0.0555556	||	0	96	0	|	0	49	0	|	0	54	0	||	Differentially Edited	0.0948273
chr2:126892804	chr2	126892804	-	UTR	||	Sppl2a	||	36	3	3	||	0.0415984	0	0.0415984	||	2	50	0.04	|	2	36	0.0555556	|	5	171	0.0292398	||	0	53	0	|	0	55	0	|	0	100	0	||	Differentially Edited	0.0321043
chr2:5021270	chr2	5021270	-	UTR	||	Optn	||	45	3	3	||	0.0426944	0	0.0426944	||	1	46	0.0217391	|	3	81	0.037037	|	7	101	0.0693069	||	0	45	0	|	0	71	0	|	0	68	0	||	Differentially Edited	0.0930303
chr10:128800542	chr10	128800542	+	UTR	||	AC131081.1;Mmp19;Tmem198b	||	50	3	3	||	0.049082	0	0.049082	||	5	134	0.0373134	|	5	104	0.0480769	|	6	97	0.0618557	||	0	67	0	|	0	56	0	|	0	50	0	||	Differentially Edited	0.0203047
chr5:113087835	chr5	113087835	-	UTR	||	2900026A02Rik	||	14	3	3	||	0.0570304	0.00793651	0.0490939	||	2	25	0.08	|	1	27	0.037037	|	2	37	0.0540541	||	1	42	0.0238095	|	0	28	0	|	0	14	0	||	Differentially Edited	0.0377274
chr2:154586335	chr2	154586335	-	UTR	||	Pxmp4	||	12	3	3	||	0.0528902	0	0.0528902	||	2	41	0.0487805	|	1	26	0.0384615	|	2	28	0.0714286	||	0	46	0	|	0	19	0	|	0	12	0	||	Differentially Edited	0.0322553
chrX:56587643	chrX	56587643	-	UTR	||	Mmgt1	||	19	3	3	||	0.0531176	0	0.0531176	||	2	25	0.08	|	2	44	0.0454545	|	2	59	0.0338983	||	0	33	0	|	0	23	0	|	0	19	0	||	Differentially Edited	0.0617473
chr19:46595175	chr19	46595175	+	UTR	||	Sfxn2	||	31	3	3	||	0.054536	0	0.054536	||	5	71	0.0704225	|	2	56	0.0357143	|	5	87	0.0574713	||	0	82	0	|	0	47	0	|	0	31	0	||	Differentially Edited	0.0327912
chr19:46595691	chr19	46595691	+	UTR	||	Sfxn2	||	0	3	2	||	0.0551102	0	0.0551102	||	4	82	0.0487805	|	2	22	0.0909091	|	1	39	0.025641	||	0	54	0	|	0	19	0	|	0	0	NA	||	Differentially Edited	0.102105
chr4:155621525	chr4	155621525	+	UTR	||	Gm10563;Gm16023;Slc35e2	||	38	3	3	||	0.055889	0	0.055889	||	3	49	0.0612245	|	2	42	0.047619	|	5	85	0.0588235	||	0	39	0	|	0	65	0	|	0	38	0	||	Differentially Edited	0.00558061
chr17:46774930	chr17	46774930	-	UTR	||	Gm26904;Rpl7l1	||	34	3	3	||	0.0571212	0	0.0571212	||	3	50	0.06	|	3	40	0.075	|	4	110	0.0363636	||	0	55	0	|	0	40	0	|	0	34	0	||	Differentially Edited	0.0366433
chr4:155622342	chr4	155622342	+	UTR	||	Gm10563;Gm16023;Slc35e2	||	20	3	3	||	0.0580917	0	0.0580917	||	1	35	0.0285714	|	4	44	0.0909091	|	4	73	0.0547945	||	0	36	0	|	0	20	0	|	0	29	0	||	Differentially Edited	0.0846587
chr4:49374685	chr4	49374685	-	intergenic	||	NA	||	24	3	3	||	0.064413	0	0.064413	||	6	77	0.0779221	|	8	150	0.0533333	|	15	242	0.0619835	||	0	35	0	|	0	24	0	|	0	97	0	||	Differentially Edited	0.0122696
chr14:31700629	chr14	31700629	-	UTR	||	Ankrd28	||	34	3	3	||	0.0698915	0.00387597	0.0660156	||	4	46	0.0869565	|	3	34	0.0882353	|	2	58	0.0344828	||	1	86	0.0116279	|	0	79	0	|	0	38	0	||	Differentially Edited	0.0590295
chr8:72482670	chr8	72482670	-	UTR	||	Slc35e1	||	37	3	3	||	0.0685154	0	0.0685154	||	5	73	0.0684932	|	7	71	0.0985915	|	2	52	0.0384615	||	0	84	0	|	0	43	0	|	0	37	0	||	Differentially Edited	0.0585989
chr7:13634217	chr7	13634217	+	Intron	||	Sult2a5	||	0	3	2	||	0.0715412	0	0.0715412	||	1	11	0.0909091	|	6	101	0.0594059	|	20	311	0.0643087	||	0	24	0	|	0	20	0	|	0	0	NA	||	Differentially Edited	0.0182046
chr4:155621049	chr4	155621049	+	UTR	||	Gm10563;Gm16023;Slc35e2	||	24	3	3	||	0.0715499	0	0.0715499	||	2	24	0.0833333	|	5	64	0.078125	|	5	94	0.0531915	||	0	45	0	|	0	32	0	|	0	51	0	||	Differentially Edited	0.0164835
chr4:49374681	chr4	49374681	-	intergenic	||	NA	||	23	3	3	||	0.0738333	0	0.0738333	||	4	75	0.0533333	|	16	146	0.109589	|	14	239	0.0585774	||	0	35	0	|	0	23	0	|	0	98	0	||	Differentially Edited	0.0542876
chr13:64290180	chr13	64290180	-	intergenic	||	Aaed1	||	132	3	3	||	0.0778268	0.002331	0.0754958	||	11	132	0.0833333	|	16	188	0.0851064	|	16	246	0.0650407	||	0	232	0	|	0	190	0	|	1	143	0.00699301	||	Differentially Edited	0.00335809
chr4:155622339	chr4	155622339	+	UTR	||	Gm10563;Gm16023;Slc35e2	||	20	3	3	||	0.0804454	0	0.0804454	||	3	34	0.0882353	|	3	43	0.0697674	|	6	72	0.0833333	||	0	36	0	|	0	20	0	|	0	29	0	||	Differentially Edited	0.004681
chr4:155621487	chr4	155621487	+	UTR	||	Gm10563;Gm16023;Slc35e2	||	24	3	3	||	0.082618	0	0.082618	||	4	38	0.105263	|	4	37	0.108108	|	2	58	0.0344828	||	0	29	0	|	0	41	0	|	0	24	0	||	Differentially Edited	0.0754693
chr2:121492422	chr2	121492422	-	UTR	||	Mfap1a	||	10	3	3	||	0.0847612	0	0.0847612	||	1	18	0.0555556	|	2	17	0.117647	|	3	37	0.0810811	||	0	13	0	|	0	10	0	|	0	22	0	||	Differentially Edited	0.0423406
chr19:46595688	chr19	46595688	+	UTR	||	Sfxn2	||	0	3	2	||	0.0854952	0	0.0854952	||	6	85	0.0705882	|	2	24	0.0833333	|	4	39	0.102564	||	0	58	0	|	0	19	0	|	0	0	NA	||	Differentially Edited	0.0116113
chr16:97857208	chr16	97857208	-	UTR	||	C2cd2	||	26	3	3	||	0.096926	0.00628931	0.0906367	||	4	35	0.114286	|	5	46	0.108696	|	4	59	0.0677966	||	1	53	0.0188679	|	0	26	0	|	0	33	0	||	Differentially Edited	0.0141012
chr11:80179665	chr11	80179665	+	intergenic	||	NA	||	40	3	3	||	0.0923302	0	0.0923302	||	10	139	0.0719424	|	6	74	0.0810811	|	15	121	0.123967	||	0	93	0	|	0	40	0	|	0	58	0	||	Differentially Edited	0.0288684
chr5:113088015	chr5	113088015	-	UTR	||	2900026A02Rik	||	9	3	3	||	0.0944998	0	0.0944998	||	3	28	0.107143	|	4	43	0.0930233	|	1	12	0.0833333	||	0	67	0	|	0	42	0	|	0	9	0	||	Differentially Edited	0.0053085
chr14:31701507	chr14	31701507	-	UTR	||	Ankrd28	||	31	3	3	||	0.094954	0	0.094954	||	3	31	0.0967742	|	6	44	0.136364	|	3	58	0.0517241	||	0	49	0	|	0	33	0	|	0	42	0	||	Differentially Edited	0.0603629
chr2:132309884	chr2	132309884	+	UTR	||	Cds2	||	17	3	3	||	0.103318	0.00680272	0.0965155	||	2	26	0.0769231	|	6	52	0.115385	|	2	17	0.117647	||	0	27	0	|	0	43	0	|	1	49	0.0204082	||	Differentially Edited	0.00748525
chr4:21834782	chr4	21834782	+	UTR	||	Usp45	||	7	3	3	||	0.13481	0.0333333	0.101477	||	1	7	0.142857	|	3	16	0.1875	|	2	27	0.0740741	||	1	10	0.1	|	0	9	0	|	0	12	0	||	Differentially Edited	0.0964865
chr8:94017337	chr8	94017337	-	intergenic	||	Nudt21	||	6	3	3	||	0.104762	0	0.104762	||	1	21	0.047619	|	1	10	0.1	|	6	36	0.166667	||	0	23	0	|	0	6	0	|	0	8	0	||	Differentially Edited	0.0932492
chr2:120600928	chr2	120600928	+	UTR	||	Snap23	||	16	3	3	||	0.10523	0	0.10523	||	2	16	0.125	|	1	18	0.0555556	|	5	37	0.135135	||	0	24	0	|	0	18	0	|	0	18	0	||	Differentially Edited	0.0521072
chrX:150985523	chrX	150985523	-	UTR	||	Gnl3l	||	17	3	3	||	0.109978	0	0.109978	||	4	25	0.16	|	1	17	0.0588235	|	3	27	0.111111	||	0	21	0	|	0	25	0	|	0	27	0	||	Differentially Edited	0.0638698
chr11:80179664	chr11	80179664	+	intergenic	||	NA	||	41	3	3	||	0.154834	0.0396888	0.115145	||	23	140	0.164286	|	8	75	0.106667	|	24	124	0.193548	||	2	93	0.0215054	|	4	41	0.097561	|	0	59	0	||	Differentially Edited	0.0432498
chr10:128800569	chr10	128800569	+	UTR	||	AC131081.1;Mmp19;Tmem198b	||	54	3	3	||	0.160391	0.0450945	0.115296	||	28	130	0.215385	|	20	110	0.181818	|	11	131	0.0839695	||	6	71	0.084507	|	2	62	0.0322581	|	1	54	0.0185185	||	Differentially Edited	0.0806999
chr14:52294216	chr14	52294216	+	UTR	||	Tox4	||	25	3	3	||	0.117826	0	0.117826	||	2	46	0.0434783	|	4	25	0.16	|	9	60	0.15	||	0	40	0	|	0	39	0	|	0	39	0	||	Differentially Edited	0.0872351
chr19:7535250	chr19	7535250	+	UTR	||	Atl3	||	46	3	3	||	0.119175	0	0.119175	||	8	46	0.173913	|	8	99	0.0808081	|	11	107	0.102804	||	0	77	0	|	0	103	0	|	0	87	0	||	Differentially Edited	0.0513374
chr4:155621470	chr4	155621470	+	UTR	||	Gm10563;Gm16023;Slc35e2	||	18	3	3	||	0.122454	0	0.122454	||	3	23	0.130435	|	5	36	0.138889	|	5	51	0.0980392	||	0	18	0	|	0	37	0	|	0	19	0	||	Differentially Edited	0.0101779
chr1:59874208	chr1	59874208	+	UTR	||	Bmpr2	||	20	3	3	||	0.124176	0	0.124176	||	2	20	0.1	|	11	70	0.157143	|	6	52	0.115385	||	0	34	0	|	0	30	0	|	0	49	0	||	Differentially Edited	0.0183805
chr7:140135785	chr7	140135785	+	intergenic	||	Paox	||	5	3	3	||	0.126208	0	0.126208	||	2	23	0.0869565	|	2	16	0.125	|	4	24	0.166667	||	0	7	0	|	0	10	0	|	0	5	0	||	Differentially Edited	0.0316911
chr8:94017320	chr8	94017320	-	intergenic	||	Nudt21	||	6	3	3	||	0.133256	0	0.133256	||	4	24	0.166667	|	2	11	0.181818	|	2	39	0.0512821	||	0	26	0	|	0	6	0	|	0	11	0	||	Differentially Edited	0.0838271
chr11:80179645	chr11	80179645	+	intergenic	||	NA	||	50	3	3	||	0.135999	0	0.135999	||	16	122	0.131148	|	6	75	0.08	|	25	127	0.19685	||	0	96	0	|	0	50	0	|	0	55	0	||	Differentially Edited	0.0566346
chr15:55254882	chr15	55254882	+	UTR	||	Deptor	||	11	3	3	||	0.137668	0	0.137668	||	3	21	0.142857	|	14	94	0.148936	|	4	33	0.121212	||	0	17	0	|	0	49	0	|	0	11	0	||	Differentially Edited	0.00371392
chr14:34231451	chr14	34231451	-	intergenic	||	AC154738.2	||	4	3	2	||	0.146296	0	0.146296	||	4	18	0.222222	|	3	18	0.166667	|	1	20	0.05	||	0	16	0	|	0	9	0	|	0	4	0	||	Differentially Edited	0.102215
chr14:52293454	chr14	52293454	+	UTR	||	Tox4	||	22	3	3	||	0.146701	0	0.146701	||	2	27	0.0740741	|	4	22	0.181818	|	7	38	0.184211	||	0	44	0	|	0	24	0	|	0	42	0	||	Differentially Edited	0.0561796
chr4:45377142	chr4	45377142	+	UTR	||	Dcaf10	||	8	3	3	||	0.148465	0	0.148465	||	3	19	0.157895	|	2	20	0.1	|	6	32	0.1875	||	0	22	0	|	0	8	0	|	0	27	0	||	Differentially Edited	0.0286724
chr5:87124818	chr5	87124818	-	intergenic	||	NA	||	18	3	3	||	0.149747	0	0.149747	||	2	19	0.105263	|	6	53	0.113208	|	6	26	0.230769	||	0	18	0	|	0	24	0	|	0	19	0	||	Differentially Edited	0.0662132
chr5:87124788	chr5	87124788	-	intergenic	||	NA	||	20	3	3	||	0.152778	0	0.152778	||	4	21	0.190476	|	7	56	0.125	|	6	42	0.142857	||	0	33	0	|	0	20	0	|	0	25	0	||	Differentially Edited	0.0159694
chr13:74607195	chr13	74607195	-	intergenic	||	Gm46430	||	4	3	2	||	0.153501	0	0.153501	||	1	5	0.2	|	2	14	0.142857	|	2	17	0.117647	||	0	12	0	|	0	4	0	|	0	8	0	||	Differentially Edited	0.0242744
chr1:133138010	chr1	133138010	+	UTR	||	Ppp1r15b	||	13	3	3	||	0.1537	0	0.1537	||	4	35	0.114286	|	2	17	0.117647	|	11	48	0.229167	||	0	54	0	|	0	13	0	|	0	27	0	||	Differentially Edited	0.0553507
chr2:126892919	chr2	126892919	-	UTR	||	Sppl2a	||	27	3	3	||	0.153895	0	0.153895	||	3	27	0.111111	|	7	42	0.166667	|	16	87	0.183908	||	0	54	0	|	0	31	0	|	0	71	0	||	Differentially Edited	0.0197662
chr5:87124821	chr5	87124821	-	intergenic	||	NA	||	17	3	3	||	0.158983	0	0.158983	||	3	17	0.176471	|	11	54	0.203704	|	3	31	0.0967742	||	0	19	0	|	0	23	0	|	0	19	0	||	Differentially Edited	0.0383926
chr8:94017312	chr8	94017312	-	intergenic	||	Nudt21	||	7	3	3	||	0.159793	0	0.159793	||	5	25	0.2	|	2	11	0.181818	|	4	41	0.097561	||	0	26	0	|	0	7	0	|	0	12	0	||	Differentially Edited	0.0368551
chr4:155622377	chr4	155622377	+	UTR	||	Gm10563;Gm16023;Slc35e2	||	28	3	3	||	0.161089	0	0.161089	||	11	55	0.2	|	9	51	0.176471	|	11	103	0.106796	||	0	52	0	|	0	28	0	|	0	36	0	||	Differentially Edited	0.0288756
chr4:155621048	chr4	155621048	+	UTR	||	Gm10563;Gm16023;Slc35e2	||	23	3	3	||	0.163326	0	0.163326	||	3	23	0.130435	|	12	64	0.1875	|	16	93	0.172043	||	0	43	0	|	0	31	0	|	0	49	0	||	Differentially Edited	0.0107106
chr16:32299854	chr16	32299854	+	UTR	||	Rnf168	||	8	3	3	||	0.165825	0	0.165825	||	1	9	0.111111	|	2	8	0.25	|	6	44	0.136364	||	0	14	0	|	0	27	0	|	0	10	0	||	Differentially Edited	0.0604015
chr15:81456163	chr15	81456163	+	UTR	||	Xpnpep3	||	7	3	3	||	0.22481	0.0537037	0.171106	||	2	11	0.181818	|	2	7	0.285714	|	6	29	0.206897	||	0	17	0	|	1	20	0.05	|	1	9	0.111111	||	Differentially Edited	0.0188887
chr11:20228606	chr11	20228606	-	UTR	||	Cep68	||	7	3	3	||	0.175397	0	0.175397	||	4	16	0.25	|	4	30	0.133333	|	1	7	0.142857	||	0	19	0	|	0	27	0	|	0	19	0	||	Differentially Edited	0.04259
chr5:125457508	chr5	125457508	+	UTR	||	Bri3bp	||	7	3	3	||	0.177778	0	0.177778	||	2	10	0.2	|	1	9	0.111111	|	4	18	0.222222	||	0	7	0	|	0	9	0	|	0	7	0	||	Differentially Edited	0.0345784
chr6:66540190	chr6	66540190	+	UTR	||	Mad2l1	||	0	2	2	||	0.183333	0	0.183333	||	0	0	NA	|	1	6	0.166667	|	6	30	0.2	||	0	2	0	|	0	5	0	|	0	7	0	||	Differentially Edited	0.0577159
chr11:75300578	chr11	75300578	-	UTR	||	Rpa1	||	28	3	3	||	0.640355	0.452208	0.188147	||	18	28	0.642857	|	31	56	0.553571	|	50	69	0.724638	||	22	47	0.468085	|	22	49	0.44898	|	40	91	0.43956	||	Differentially Edited	0.0587872
chr4:45377141	chr4	45377141	+	UTR	||	Dcaf10	||	8	3	3	||	0.188426	0	0.188426	||	5	18	0.277778	|	2	20	0.1	|	6	32	0.1875	||	0	22	0	|	0	8	0	|	0	30	0	||	Differentially Edited	0.0668352
chr2:91213286	chr2	91213286	+	UTR	||	Acp2;Ddb2	||	28	3	3	||	0.190283	0	0.190283	||	10	38	0.263158	|	7	28	0.25	|	3	52	0.0576923	||	0	49	0	|	0	33	0	|	0	42	0	||	Differentially Edited	0.103263
chr2:5019740	chr2	5019740	-	intergenic	||	NA	||	7	3	3	||	0.191111	0	0.191111	||	1	15	0.0666667	|	4	15	0.266667	|	6	25	0.24	||	0	7	0	|	0	10	0	|	0	12	0	||	Differentially Edited	0.0928755
chr17:24176191	chr17	24176191	-	UTR	||	Gm43796;Tbc1d24	||	5	3	3	||	0.192068	0	0.192068	||	4	17	0.235294	|	2	8	0.25	|	1	11	0.0909091	||	0	9	0	|	0	7	0	|	0	5	0	||	Differentially Edited	0.0632803
chr2:84332775	chr2	84332775	-	UTR	||	Calcrl	||	31	3	3	||	0.198112	0	0.198112	||	7	31	0.225806	|	5	59	0.0847458	|	21	74	0.283784	||	0	42	0	|	0	35	0	|	0	66	0	||	Differentially Edited	0.078644
chr5:87124819	chr5	87124819	-	intergenic	||	NA	||	19	3	3	||	0.203501	0	0.203501	||	2	19	0.105263	|	15	53	0.283019	|	6	27	0.222222	||	0	21	0	|	0	24	0	|	0	19	0	||	Differentially Edited	0.059859
chr2:14148682	chr2	14148682	+	UTR	||	Stam	||	1	3	2	||	0.203704	0	0.203704	||	2	6	0.333333	|	1	9	0.111111	|	1	6	0.166667	||	0	11	0	|	0	1	0	|	0	9	0	||	Differentially Edited	0.0927353
chr11:75176344	chr11	75176344	-	UTR	||	1700016P03Rik;Ovca2	||	4	3	2	||	0.208974	0	0.208974	||	3	10	0.3	|	1	13	0.0769231	|	6	24	0.25	||	0	4	0	|	0	9	0	|	0	15	0	||	Differentially Edited	0.0906051
chr11:82963277	chr11	82963277	+	intergenic	||	Slfn5	||	10	3	3	||	0.218222	0	0.218222	||	3	13	0.230769	|	6	19	0.315789	|	4	37	0.108108	||	0	10	0	|	0	12	0	|	0	33	0	||	Differentially Edited	0.0685505
chr1:139549317	chr1	139549317	-	Intron	||	Cfhr1	||	3	3	2	||	0.218254	0	0.218254	||	2	6	0.333333	|	5	21	0.238095	|	2	24	0.0833333	||	0	9	0	|	0	3	0	|	0	11	0	||	Differentially Edited	0.0956834
chr8:94017315	chr8	94017315	-	intergenic	||	Nudt21	||	6	3	3	||	0.245596	0.0238095	0.221787	||	5	24	0.208333	|	4	12	0.333333	|	8	41	0.195122	||	2	28	0.0714286	|	0	6	0	|	0	11	0	||	Differentially Edited	0.0202504
chr12:8750269	chr12	8750269	+	UTR	||	Pum2	||	11	3	3	||	0.227576	0	0.227576	||	7	22	0.318182	|	9	44	0.204545	|	12	75	0.16	||	0	11	0	|	0	31	0	|	0	64	0	||	Differentially Edited	0.040253
chr5:87124826	chr5	87124826	-	intergenic	||	NA	||	18	3	3	||	0.228044	0	0.228044	||	2	18	0.111111	|	12	55	0.218182	|	11	31	0.354839	||	0	20	0	|	0	24	0	|	0	20	0	||	Differentially Edited	0.0838076
chr16:32299847	chr16	32299847	+	UTR	||	Rnf168	||	8	3	3	||	0.230496	0	0.230496	||	3	8	0.375	|	1	8	0.125	|	9	47	0.191489	||	0	14	0	|	0	25	0	|	0	9	0	||	Differentially Edited	0.0910535
chr19:46595692	chr19	46595692	+	UTR	||	Sfxn2	||	0	3	2	||	0.230694	0	0.230694	||	17	84	0.202381	|	4	23	0.173913	|	12	38	0.315789	||	0	52	0	|	0	19	0	|	0	0	NA	||	Differentially Edited	0.0335202
chr11:82963215	chr11	82963215	+	intergenic	||	Slfn5	||	10	3	3	||	0.235589	0	0.235589	||	5	19	0.263158	|	4	14	0.285714	|	3	19	0.157895	||	0	10	0	|	0	13	0	|	0	30	0	||	Differentially Edited	0.0268338
chr3:116744084	chr3	116744084	-	UTR	||	Agl	||	16	3	3	||	0.236898	0	0.236898	||	3	16	0.1875	|	13	51	0.254902	|	11	41	0.268293	||	0	40	0	|	0	37	0	|	0	28	0	||	Differentially Edited	0.0109538
chr10:128800572	chr10	128800572	+	UTR	||	AC131081.1;Mmp19;Tmem198b	||	59	3	3	||	0.237621	0	0.237621	||	50	134	0.373134	|	20	105	0.190476	|	20	134	0.149254	||	0	72	0	|	0	62	0	|	0	59	0	||	Differentially Edited	0.0745622
[truncated: 1,380 more rows]

## Sheet: Cortex-Adar KO
Editing Site (ES)	Chromosome	Position	Strand	Annotation	||	HostGene(s)	||	Min Coverage Across 6 Samples	No. of WT Samples with Coverage>=5	No. of KO Samples with Coverage>=5	||	Mean Editing Levels - WT	Mean Editing Levels - KO	WT-KO (>0 : Decreases in Mutant & <0 : Increases in Mutant)	||	WT1-Edited Reads	WT1-Total Reads	WT1-Editing Levels	|	WT2-Edited Reads	WT2-Total Reads	WT2-Editing Levels	|	WT3-Edited Reads	WT3-Total Reads	WT3-Editing Levels	||	KO1-Edited Reads	KO1-Total Reads	KO1-Editing Levels	|	KO2-Edited Reads	KO2-Total Reads	KO2-Editing Levels	|	KO3-Edited Reads	KO3-Total Reads	KO3-Editing Levels	||	Differential Editing Classification	Welch t-test p-Value
[truncated: 9,382 more rows]

[truncated: 1 more sheets: Cortex-Adarb1 KO]
