# Supplementary material for: ADAR-deficiency perturbs the global splicing landscape in mouse tissues
Source: Genome Res. 2020 Aug;30(8):1107–18. doi: 10.1101/gr.256933.119 (PMC7462079; doi:10.1101/gr.256933.119)
Supplement: Supplemental Material [file supp_gr.256933.119_Supplemental_Dataset_S2.xlsx]

## Sheet: Legend
Supp. Dataset 2 - MAJIQ - - - Differential Splicing Analysis of ADAR1 (Adar) and ADAR2 (Adarb1) Mutant Mouse Tissues
	Column Header		Column Description
	Gene Name		Gene harboring the differential splicing event
	Transcript ID		Transcript ID of the transcripts annotated to the gene harboring the differential splicing event
	LSV ID		ID of the Local Splicing Variation (LSV) [also known as differential splicing event]
	E(dPSI) per LSV junction		Difference in the relative abundance of splice junction usage between WT and KO
	P(|E(dPSI)|>=0.20) per LSV junction		Probability that delta PSI values between 2 conditions is greater than or equal to 20%
	Tissue X - - - Adar WT E(PSI)		Relative abundance in Percent Spliced In (PSI) values of LSV in Adar WT
	Tissue X - - - Adar KO E(PSI)		Relative abundance in Percent Spliced In (PSI) values of LSV in Adar KO
LSV Attributes	LSV Type		Type of local splicing variation: source or target
	A5SS		Alternative 5' splice site
	A3SS		Alternative 3' splice site
	ES		Exon Skipping
	Num. Junctions		Number of splice junctions
	Num. Exons		Number of exons involved in the LSV
	De Novo Junctions?		Number of de novo identfied splice junctions
	Chr		chromosome
	Strand		strand
	Junctions Coordinates		coordinates of splice junctions
	Exons Coordinates		coordinates of exons involved in the LSV
	Exons Alternative Start		Alternative splice site start in the exon
	Exons Alternative End		Alternative splice site end in the exon
	IR Coordinates		intron retention coordinates

## Sheet: Bone Marrow-Adar KO-MasterTable
#Gene Name	Transcript ID	LSV ID	E(dPSI) per LSV junction	P(|E(dPSI)|>=0.20) per LSV junction	Bone Marrow Adar WT E(PSI)	Bone Marrow Adar KO E(PSI)	A5SS	A3SS	ES	Num. Junctions	Num. Exons	De Novo Junctions?	Chr	Strand	Junctions Coordinates	Exons Coordinates	IR Coordinates
2003-03-01	ENSMUST00000102912	ENSMUST00000102912:56901211-56901221:source	-0.32399373695037925;0.32399373695038075	0.9883079496476426;0.9883079496476426	0.344;0.656	0.025;0.975	FALSE	FALSE	FALSE	1	2	1	chr18	-	56901221-56901300;56901221-56901222	56901211-56901221;56901222-56901299;56901300-56901310	(56901222, 56901299)
Adgrf5	ENSMUST00000113599	ENSMUST00000113599:43437516-43437686:source	-0.20890709790258347;0.20890709790258502	0.6272942248096702;0.6272942248096702	0.692;0.308	0.453;0.547	FALSE	FALSE	TRUE	2	3	1	chr17	+	43437686-43439676;43437686-43439951	43437516-43437686;43439676-43439795;43439951-43440160
Adgrg3	ENSMUST00000051259	ENSMUST00000051259:95036441-95036480:target	0.25774329142170327;-0.2577432914217017	0.9197064690634804;0.9197064690634804	0.704;0.296	0.960;0.040	FALSE	FALSE	TRUE	2	3	1	chr8	+	95035944-95036441;95036328-95036441	95035810-95035944;95036207-95036328;95036441-95036480
Ampd2	ENSMUST00000078912	ENSMUST00000078912:108080063-108080174:source	-0.21059496931596738;0.21059496931596897	0.7212654777257196;0.7212654777257196	0.970;0.030	0.749;0.251	FALSE	FALSE	FALSE	1	2	1	chr3	-	108080174-108080267;108080174-108080175	108080063-108080174;108080175-108080266;108080267-108080335	(108080175, 108080266)
Ampd2	ENSMUST00000102637	ENSMUST00000102637:108080063-108080174:source	-0.20981354176192352;0.20981354176192507	0.7157120968755074;0.7157120968755074	0.970;0.030	0.750;0.250	FALSE	FALSE	FALSE	1	2	1	chr3	-	108080174-108080267;108080174-108080175	108080063-108080174;108080175-108080266;108080267-108080335	(108080175, 108080266)
Ampd2	ENSMUST00000102638	ENSMUST00000102638:108080063-108080174:source	-0.21020683594566764;0.21020683594566913	0.7160098379918314;0.7160098379918314	0.970;0.030	0.750;0.250	FALSE	FALSE	FALSE	1	2	1	chr3	-	108080174-108080267;108080174-108080175	108080063-108080174;108080175-108080266;108080267-108080335	(108080175, 108080266)
Ampd2	ENSMUST00000133129	ENSMUST00000133129:108080063-108080174:source	-0.20671275743646522;0.20671275743646678	0.6970838837058652;0.6970838837058652	0.970;0.030	0.753;0.247	FALSE	FALSE	FALSE	1	2	1	chr3	-	108080174-108080267;108080174-108080175	108080063-108080174;108080175-108080266;108080267-108080618	(108080175, 108080266)
Ampd2	ENSMUST00000136712	ENSMUST00000136712:108080063-108080174:source	-0.2115324538132854;0.21153245381328695	0.7250708385948396;0.7250708385948396	0.970;0.030	0.749;0.251	FALSE	FALSE	FALSE	1	2	1	chr3	-	108080174-108080267;108080174-108080175	108080063-108080174;108080175-108080266;108080267-108080774	(108080175, 108080266)
Ampd2	ENSMUST00000153626	ENSMUST00000153626:108079922-108080174:source	-0.20935311713637053;0.20935311713637203	0.7143850626672146;0.7143850626672146	0.970;0.030	0.751;0.249	FALSE	FALSE	FALSE	1	2	1	chr3	-	108080174-108080267;108080174-108080175	108079922-108080174;108080175-108080266;108080267-108080774	(108080175, 108080266)
Arhgef1	ENSMUST00000151121	ENSMUST00000151121:24907854-24907934:target	-0.2061651244019739;0.2061651244019754	0.6409401494708433;0.6409401494708433	0.879;0.121	0.652;0.348	FALSE	FALSE	FALSE	1	2	1	chr7	+	24907757-24907854;24907853-24907854	24907647-24907757;24907758-24907853;24907854-24907934	(24907758, 24907853)
Arhgef2	ENSMUST00000029694	ENSMUST00000029694:88642926-88643039:source	0.2526130430634322;-0.25261304306343074	0.8704469802619941;0.8704469802619941	0.617;0.383	0.874;0.126	FALSE	FALSE	FALSE	1	2	1	chr3	+	88643039-88643149;88643039-88643040	88642926-88643039;88643040-88643148;88643149-88643216	(88643040, 88643148)
Arhgef2	ENSMUST00000107510	ENSMUST00000107510:88642926-88643039:source	0.2517195044546218;-0.2517195044546204	0.8635628645282956;0.8635628645282956	0.617;0.383	0.873;0.127	FALSE	FALSE	FALSE	1	2	1	chr3	+	88643039-88643149;88643039-88643040	88642926-88643039;88643040-88643148;88643149-88643216	(88643040, 88643148)
Arhgef2	ENSMUST00000170653	ENSMUST00000170653:88642926-88643039:source	0.2502670459189615;-0.2502670459189598	0.8607321979792117;0.8607321979792117	0.618;0.382	0.873;0.127	FALSE	FALSE	FALSE	1	2	1	chr3	+	88643039-88643149;88643039-88643040	88642926-88643039;88643040-88643148;88643149-88643216	(88643040, 88643148)
Arhgef2	ENSMUST00000175779	ENSMUST00000175779:88642926-88643039:source	0.25015985936348445;-0.2501598593634829	0.8602805714108407;0.8602805714108407	0.617;0.383	0.871;0.129	FALSE	FALSE	FALSE	1	2	1	chr3	+	88643039-88643149;88643039-88643040	88642926-88643039;88643040-88643148;88643149-88643216	(88643040, 88643148)
Arhgef2	ENSMUST00000175903	ENSMUST00000175903:88642926-88643039:source	0.2494693144693257;-0.2494693144693241	0.858851214042547;0.858851214042547	0.618;0.382	0.872;0.128	FALSE	FALSE	FALSE	1	2	1	chr3	+	88643039-88643149;88643039-88643040	88642926-88643039;88643040-88643148;88643149-88643216	(88643040, 88643148)
Arhgef2	ENSMUST00000176500	ENSMUST00000176500:88642926-88643039:source	0.25085691489176654;-0.25085691489176504	0.8643327714002383;0.8643327714002383	0.618;0.382	0.873;0.127	FALSE	FALSE	FALSE	1	2	1	chr3	+	88643039-88643149;88643039-88643040	88642926-88643039;88643040-88643148;88643149-88643216	(88643040, 88643148)
Arhgef2	ENSMUST00000176804	ENSMUST00000176804:88642926-88643039:source	0.25315391778197127;-0.2531539177819698	0.8689898608467345;0.8689898608467345	0.616;0.384	0.873;0.127	FALSE	FALSE	FALSE	1	2	1	chr3	+	88643039-88643149;88643039-88643040	88642926-88643039;88643040-88643148;88643149-88643216	(88643040, 88643148)
Arhgef2	ENSMUST00000177303	ENSMUST00000177303:88642926-88643039:source	0.248797228570436;-0.24879722857043451	0.8537660472203892;0.8537660472203892	0.618;0.382	0.872;0.128	FALSE	FALSE	FALSE	1	2	1	chr3	+	88643039-88643149;88643039-88643040	88642926-88643039;88643040-88643148;88643149-88643216	(88643040, 88643148)
Arhgef2	ENSMUST00000177498	ENSMUST00000177498:88642926-88643039:source	0.25137020711398717;-0.25137020711398567	0.8628010953966161;0.8628010953966161	0.617;0.383	0.872;0.128	FALSE	FALSE	FALSE	1	2	1	chr3	+	88643039-88643149;88643039-88643040	88642926-88643039;88643040-88643148;88643149-88643216	(88643040, 88643148)
Asxl1	ENSMUST00000109790	ENSMUST00000109790:153393882-153393978:target	0.22140673454585785;-0.22140673454585633	0.7374396924950151;0.7374396924950151	0.711;0.289	0.941;0.059	FALSE	FALSE	FALSE	1	2	1	chr2	+	153393787-153393882;153393881-153393882	153393624-153393787;153393788-153393881;153393882-153393978	(153393788, 153393881)
Asxl1	ENSMUST00000138571	ENSMUST00000138571:153393882-153393978:target	0.21816847795706903;-0.21816847795706748	0.7192898270958592;0.7192898270958592	0.714;0.286	0.942;0.058	FALSE	FALSE	FALSE	1	2	1	chr2	+	153393787-153393882;153393881-153393882	153393349-153393787;153393788-153393881;153393882-153393978	(153393788, 153393881)
Atad2b	ENSMUST00000045664	ENSMUST00000045664:5013803-5013999:source	0.4842403876085473;-0.48424038760854565	0.9997301659769038;0.9997301659769038	0.345;0.655	0.817;0.183	TRUE	TRUE	FALSE	2	2	1	chr12	+	5013984-5017983;5013999-5017983	5013803-5013999;5017983-5018142;5017983-5018142
Atrn	ENSMUST00000028781	ENSMUST00000028781:131018505-131018691:target	-0.3362725342756956;0.3362725342756972	0.992158844029198;0.992158844029198	0.372;0.628	0.045;0.955	FALSE	TRUE	TRUE	2	3	1	chr2	+	131015130-131018505;131013668-131018613	131013607-131013668;131015120-131015130;131018505-131018691
BC037034	ENSMUST00000048421	ENSMUST00000048421:138262414-138262534:target	-0.2353904767153766;0.23539047671537808	0.7961461552771681;0.7961461552771681	0.891;0.109	0.648;0.352	FALSE	FALSE	FALSE	1	2	1	chr5	-	138262317-138262414;138262413-138262414	138262170-138262317;138262318-138262413;138262414-138262534	(138262318, 138262413)
BC037034	ENSMUST00000048421	ENSMUST00000048421:138262847-138262976:target	-0.20054644890835302;0.20054644890835455	0.6028042049689133;0.6028042049689133	0.824;0.176	0.597;0.403	FALSE	FALSE	FALSE	1	2	1	chr5	-	138262744-138262847;138262846-138262847	138262658-138262744;138262745-138262846;138262847-138262976	(138262745, 138262846)
BC037034	ENSMUST00000159123	ENSMUST00000159123:138262414-138262534:target	-0.23622651417729124;0.2362265141772928	0.7992225206289868;0.7992225206289868	0.892;0.108	0.648;0.352	FALSE	FALSE	FALSE	1	2	1	chr5	-	138262317-138262414;138262413-138262414	138262170-138262317;138262318-138262413;138262414-138262534	(138262318, 138262413)
BC037034	ENSMUST00000159649	ENSMUST00000159649:138262414-138262534:target	-0.23502266995459015;0.23502266995459165	0.7906857312437512;0.7906857312437512	0.889;0.111	0.645;0.355	FALSE	FALSE	FALSE	1	2	1	chr5	-	138262317-138262414;138262413-138262414	138262170-138262317;138262318-138262413;138262414-138262534	(138262318, 138262413)
BC037034	ENSMUST00000159872	ENSMUST00000159872:138262414-138263138:target	-0.3213038604197928;0.3213038604197943	0.9562342348134104;0.9562342348134104	0.839;0.161	0.519;0.481	FALSE	FALSE	FALSE	1	2	1	chr5	-	138262317-138262414;138262413-138262414	138262253-138262317;138262318-138262413;138262414-138263138	(138262318, 138262413)
Bicral	ENSMUST00000040624	ENSMUST00000040624:46829912-46829980:source	-0.2406057254794103;0.24060572547941184	0.7633740643781863;0.7633740643781863	0.857;0.143	0.600;0.400	FALSE	FALSE	FALSE	1	2	1	chr17	-	46829980-46830065;46829980-46829981	46829912-46829980;46829981-46830064;46830065-46830113	(46829981, 46830064)
Braf	ENSMUST00000002487	ENSMUST00000002487:39677572-39677641:target	-0.3028241617188584;0.3028241617188599	0.9518183727452066;0.9518183727452066	0.367;0.633	0.068;0.932	FALSE	FALSE	FALSE	1	2	1	chr6	-	39677472-39677572;39677571-39677572	39677378-39677472;39677473-39677571;39677572-39677641	(39677473, 39677571)
Cabin1	ENSMUST00000001712	ENSMUST00000001712:75732400-75732515:target	0.3218417026465391;-0.32184170264653755	0.9977398473634954;0.9977398473634954	0.057;0.943	0.372;0.628	FALSE	FALSE	TRUE	2	3	1	chr10	-	75729135-75732400;75727019-75732400	75726858-75727019;75729026-75729135;75732400-75732515
Cdt1	ENSMUST00000006760	ENSMUST00000006760:122569904-122570101:source	-0.20845992051114923;0.2084599205111508	0.6858817077692553;0.6858817077692553	0.874;0.126	0.653;0.347	FALSE	FALSE	FALSE	1	2	1	chr8	+	122570101-122570194;122570101-122570102	122569904-122570101;122570102-122570193;122570194-122570339	(122570102, 122570193)
Clk1	ENSMUST00000034868	ENSMUST00000034868:58417267-58417383:target	-0.2018577030063317;0.20185770300633324	0.6583145774016739;0.6583145774016739	0.836;0.164	0.631;0.369	FALSE	FALSE	FALSE	1	2	1	chr1	-	58417179-58417267;58417266-58417267	58417013-58417179;58417180-58417266;58417267-58417383	(58417180, 58417266)
Clk1	ENSMUST00000131051	ENSMUST00000131051:58417267-58417426:target	-0.21284970232450545;0.21284970232450698	0.7250218839789498;0.7250218839789498	0.838;0.162	0.624;0.376	FALSE	FALSE	FALSE	1	2	1	chr1	-	58417179-58417267;58417266-58417267	58416910-58417179;58417180-58417266;58417267-58417426	(58417180, 58417266)
Clk1	ENSMUST00000148330	ENSMUST00000148330:58417267-58417383:target	-0.20521761336181785;0.2052176133618194	0.6856394374626021;0.6856394374626021	0.839;0.161	0.632;0.368	FALSE	FALSE	FALSE	1	2	1	chr1	-	58417179-58417267;58417266-58417267	58417013-58417179;58417180-58417266;58417267-58417383	(58417180, 58417266)
Clk1	ENSMUST00000156931	ENSMUST00000156931:58417267-58417383:target	-0.20904729095204813;0.20904729095204969	0.721969706426557;0.721969706426557	0.839;0.161	0.629;0.371	FALSE	FALSE	FALSE	1	2	1	chr1	-	58417179-58417267;58417266-58417267	58417013-58417179;58417180-58417266;58417267-58417383	(58417180, 58417266)
Clk1	ENSMUST00000186552	ENSMUST00000186552:58417267-58417383:target	-0.20056525310553072;0.20056525310553225	0.6540547567603593;0.6540547567603593	0.837;0.163	0.634;0.366	FALSE	FALSE	FALSE	1	2	1	chr1	-	58417179-58417267;58417266-58417267	58417013-58417179;58417180-58417266;58417267-58417383	(58417180, 58417266)
Cnot6	ENSMUST00000145353	ENSMUST00000145353:49685087-49685155:source	-0.20897711907276695;0.20897711907276847	0.6386519092537095;0.6386519092537095	0.737;0.263	0.502;0.498	FALSE	FALSE	FALSE	1	2	1	chr11	-	49685155-49685248;49685155-49685156	49685087-49685155;49685156-49685247;49685248-49685352	(49685156, 49685247)
Cpne1	ENSMUST00000079312	ENSMUST00000079312:156077556-156077689:target	0.2656865841388702;-0.2656865841388687	0.9569610872732562;0.9569610872732562	0.702;0.298	0.963;0.037	FALSE	FALSE	FALSE	1	2	1	chr2	-	156077453-156077556;156077555-156077556	156077399-156077453;156077454-156077555;156077556-156077689	(156077454, 156077555)
Cpne1	ENSMUST00000109607	ENSMUST00000109607:156077556-156077689:target	0.2691415079391803;-0.2691415079391786	0.9676755898466438;0.9676755898466438	0.699;0.301	0.963;0.037	FALSE	FALSE	FALSE	1	2	1	chr2	-	156077453-156077556;156077555-156077556	156077399-156077453;156077454-156077555;156077556-156077689	(156077454, 156077555)
Cpne1	ENSMUST00000109608	ENSMUST00000109608:156077556-156077689:target	0.27025896502340085;-0.2702589650233993	0.9685784920667811;0.9685784920667811	0.698;0.302	0.963;0.037	FALSE	FALSE	FALSE	1	2	1	chr2	-	156077453-156077556;156077555-156077556	156077399-156077453;156077454-156077555;156077556-156077689	(156077454, 156077555)
Cpne1	ENSMUST00000136296	ENSMUST00000136296:156077556-156077689:target	0.26553987648601374;-0.26553987648601224	0.9602164654595969;0.9602164654595969	0.702;0.298	0.963;0.037	FALSE	FALSE	FALSE	1	2	1	chr2	-	156077453-156077556;156077555-156077556	156077399-156077453;156077454-156077555;156077556-156077689	(156077454, 156077555)
Cpne1	ENSMUST00000142960	ENSMUST00000142960:156078167-156078233:source	0.20699245379013742;-0.2069924537901359	0.6218253286895681;0.6218253286895681	0.693;0.307	0.926;0.074	FALSE	FALSE	FALSE	1	2	1	chr2	-	156078233-156078332;156078233-156078234	156078167-156078233;156078234-156078331;156078332-156078421	(156078234, 156078331)
Cpne1	ENSMUST00000142975	ENSMUST00000142975:156077556-156077689:target	0.26944544185536157;-0.26944544185535996	0.9660516764238859;0.9660516764238859	0.698;0.302	0.963;0.037	FALSE	FALSE	FALSE	1	2	1	chr2	-	156077453-156077556;156077555-156077556	156077399-156077453;156077454-156077555;156077556-156077689	(156077454, 156077555)
Cpne1	ENSMUST00000147627	ENSMUST00000147627:156077556-156077689:target	0.2684455564128078;-0.2684455564128064	0.965137949853719;0.965137949853719	0.699;0.301	0.963;0.037	FALSE	FALSE	FALSE	1	2	1	chr2	-	156077453-156077556;156077555-156077556	156077399-156077453;156077454-156077555;156077556-156077689	(156077454, 156077555)
Cpne1	ENSMUST00000153634	ENSMUST00000153634:156077556-156077689:target	0.39376812422234697;-0.3937681242223454	0.9997693566547211;0.9997693566547211	0.561;0.439	0.942;0.058	FALSE	FALSE	FALSE	1	2	1	chr2	-	156077453-156077556;156077555-156077556	156077399-156077453;156077454-156077555;156077556-156077689	(156077454, 156077555)
Cpne1	ENSMUST00000183733	ENSMUST00000183733:156077556-156077689:target	0.26488312021228844;-0.26488312021228694	0.9600834130651746;0.9600834130651746	0.702;0.298	0.963;0.037	FALSE	FALSE	FALSE	1	2	1	chr2	-	156077453-156077556;156077555-156077556	156077399-156077453;156077454-156077555;156077556-156077689	(156077454, 156077555)
Dennd4a	ENSMUST00000038890	ENSMUST00000038890:64835286-64835352:source	0.12820416293663972;-0.24273940790783777;0.08742179858051834	0.12060768973763575;0.8969652087622283;0.00040606549556188265	0.185;0.732;0.081	0.329;0.490;0.181	FALSE	FALSE	TRUE	3	4	1	chr9	+	64835352-64835508;64835352-64835954;64835352-64838813	64835286-64835352;64835508-64835586;64835954-64836081;64838813-64839144
Dgka	ENSMUST00000026414	ENSMUST00000026414:128736576-128736617:source	-0.4217789423769553;0.4217789423769569	0.9999984850319548;0.9999984850319548	0.437;0.563	0.026;0.974	FALSE	FALSE	FALSE	1	2	1	chr10	-	128736617-128736687;128736617-128736618	128736576-128736617;128736618-128736644;128736645-128736718	(128736618, 128736644)
Dgkd	ENSMUST00000027517	ENSMUST00000027517:87926051-87926324:target	0.2172097069413586;-0.21720970694135708	0.7689966226945748;0.7689966226945748	0.740;0.260	0.962;0.038	FALSE	FALSE	FALSE	1	2	1	chr1	+	87925972-87926051;87926050-87926051	87925873-87925972;87925973-87926050;87926051-87926324	(87925973, 87926050)
Dock2	ENSMUST00000093193	ENSMUST00000093193:34543705-34544600:source	-0.06044960937045549;-0.2453825620280058;0.34261646671327656;0.0010476462682555046;-0.000743370690057409;0.006093604815275262	6.013186740269537e-07;0.8910549550479228;0.9887248766606698;5.622487379978811e-09;5.388653949653398e-09;2.3108086887518988e-07	0.091;0.269;0.579;0.025;0.027;0.025	0.025;0.027;0.912;0.027;0.027;0.035	TRUE	TRUE	TRUE	6	5	1	chr11	-	34544600-34544842;34544574-34681824;34544443-34681718;34544279-34681788;34543846-34681884;34543761-34544669	34543705-34544600;34544669-34544706;34544842-34544962;34681694-34681749;34681788-34682025;34681788-34682025;34681788-34682025
Dock8	ENSMUST00000025831	ENSMUST00000025831:25061108-25061283:target	0.22678833558099304;-0.22678833558099148	0.8575776822367456;0.8575776822367456	0.658;0.342	0.886;0.114	FALSE	FALSE	TRUE	2	3	1	chr19	+	25051589-25061108;25052638-25061108	25051487-25051589;25052628-25052638;25061108-25061283
Etnk1	ENSMUST00000032413	ENSMUST00000032413:143203384-143208546:target	-0.23649365084126386;0.23649365084126547	0.8325338604092578;0.8325338604092578	0.839;0.161	0.598;0.402	FALSE	TRUE	TRUE	2	3	1	chr6	+	143203152-143203384;143207317-143207339	143203079-143203152;143203384-143208546
Fam13b	ENSMUST00000040506	ENSMUST00000040506:34473550-34473685:source	-0.21084404162944384;0.2108440416294454	0.7236366009410649;0.7236366009410649	0.972;0.028	0.754;0.246	FALSE	FALSE	TRUE	2	3	1	chr18	-	34473685-34486979;34473685-34480455	34473550-34473685;34480455-34480578;34486979-34487139
Fam13b	ENSMUST00000040506	ENSMUST00000040506:34462961-34463009:source	0.04825360594989867;-0.28826408524040925;0.22193583826490237	2.203630518174323e-07;0.976776248813731;0.7908614181977464	0.026;0.862;0.115	0.080;0.578;0.342	FALSE	FALSE	TRUE	3	4	1	chr18	-	34463009-34473550;34463009-34465156;34463009-34464238	34462961-34463009;34464238-34464336;34465156-34465220;34473550-34473685
Fam91a1	ENSMUST00000037270	ENSMUST00000037270:58443161-58443274:target	0.20731430224181815;-0.20731430224181666	0.6768597555231165;0.6768597555231165	0.116;0.884	0.336;0.664	FALSE	FALSE	TRUE	2	3	1	chr15	+	58441726-58443161;58442966-58443161	58441578-58441726;58442832-58442966;58443161-58443274
Fam91a1	ENSMUST00000037270	ENSMUST00000037270:58441578-58441726:source	-0.28725922730628867;0.2872592273062902	0.9209623207155178;0.9209623207155178	0.843;0.157	0.554;0.446	FALSE	FALSE	TRUE	2	3	1	chr15	+	58441726-58442832;58441726-58443161	58441578-58441726;58442832-58442966;58443161-58443274
Fanca	ENSMUST00000035495	ENSMUST00000035495:123274337-123274396:source	-0.3091525714780445;0.30915257147804603	0.9384585337818264;0.9384585337818264	0.709;0.291	0.399;0.601	FALSE	FALSE	FALSE	1	2	1	chr8	-	123274396-123274468;123274396-123274397	123274337-123274396;123274397-123274467;123274468-123274573	(123274397, 123274467)
Fanca	ENSMUST00000126834	ENSMUST00000126834:123274337-123274396:source	-0.30782376175584464;0.30782376175584614	0.9397129752658294;0.9397129752658294	0.708;0.292	0.399;0.601	FALSE	FALSE	FALSE	1	2	1	chr8	-	123274396-123274468;123274396-123274397	123274337-123274396;123274397-123274467;123274468-123274573	(123274397, 123274467)
Fanca	ENSMUST00000155510	ENSMUST00000155510:123274337-123274396:source	-0.30909256313620914;0.3090925631362107	0.9389297222765275;0.9389297222765275	0.710;0.290	0.400;0.600	FALSE	FALSE	FALSE	1	2	1	chr8	-	123274396-123274468;123274396-123274397	123274337-123274396;123274397-123274467;123274468-123274573	(123274397, 123274467)
Fbxo5	ENSMUST00000019907	ENSMUST00000019907:5801152-5801242:target	-0.2816081619811615;0.2816081619811631	0.993458480979053;0.993458480979053	0.918;0.082	0.642;0.358	FALSE	FALSE	TRUE	2	3	1	chr10	-	5800435-5801152;5799822-5801152	5799160-5799822;5800256-5800435;5801152-5801242
Gabpb2	ENSMUST00000155555	ENSMUST00000155555:95197438-95200291:source	-0.3489487323565458;0.3489487323565473	0.9999999999367313;0.9999999999367313	0.975;0.025	0.635;0.365	FALSE	TRUE	TRUE	2	3	1	chr3	-	95200291-95203731;95197570-95197594	95197438-95200291;95203731-95204808
Glb1l	ENSMUST00000113623	ENSMUST00000113623:75202187-75202308:target	-0.32104273037357195;0.32104273037357356	0.9476937537257079;0.9476937537257079	0.902;0.098	0.580;0.420	FALSE	FALSE	FALSE	1	2	1	chr1	-	75202090-75202187;75202186-75202187	75202050-75202090;75202091-75202186;75202187-75202308	(75202091, 75202186)
Glb1l	ENSMUST00000132507	ENSMUST00000132507:75202187-75202308:target	-0.32147490837892395;0.3214749083789253	0.948953548698408;0.948953548698408	0.901;0.099	0.580;0.420	FALSE	FALSE	FALSE	1	2	1	chr1	-	75202090-75202187;75202186-75202187	75202050-75202090;75202091-75202186;75202187-75202308	(75202091, 75202186)
Glb1l	ENSMUST00000155716	ENSMUST00000155716:75202187-75202308:target	-0.3222267413806825;0.32222674138068413	0.9510098953915871;0.9510098953915871	0.901;0.099	0.579;0.421	FALSE	FALSE	FALSE	1	2	1	chr1	-	75202090-75202187;75202186-75202187	75202050-75202090;75202091-75202186;75202187-75202308	(75202091, 75202186)
Glb1l	ENSMUST00000186173	ENSMUST00000186173:75202187-75202308:target	-0.32188361711616137;0.3218836171161629	0.9498501729525834;0.9498501729525834	0.901;0.099	0.579;0.421	FALSE	FALSE	FALSE	1	2	1	chr1	-	75202090-75202187;75202186-75202187	75202050-75202090;75202091-75202186;75202187-75202308	(75202091, 75202186)
Glb1l	ENSMUST00000189663	ENSMUST00000189663:75202187-75202308:target	-0.32778745047636143;0.327787450476363	0.955894493774829;0.955894493774829	0.901;0.099	0.574;0.426	FALSE	FALSE	FALSE	1	2	1	chr1	-	75202090-75202187;75202186-75202187	75202050-75202090;75202091-75202186;75202187-75202308	(75202091, 75202186)
Gm28036	ENSMUST00000127956	ENSMUST00000127956:156077556-156077689:target	0.2698124220825356;-0.26981242208253403	0.9643811676730799;0.9643811676730799	0.698;0.302	0.963;0.037	FALSE	FALSE	FALSE	1	2	1	chr2	-	156077453-156077556;156077555-156077556	156077399-156077453;156077454-156077555;156077556-156077689	(156077454, 156077555)
Gm28036	ENSMUST00000132494	ENSMUST00000132494:156077556-156077689:target	0.2706393592598817;-0.27063935925988014	0.9668013768861097;0.9668013768861097	0.697;0.303	0.963;0.037	FALSE	FALSE	FALSE	1	2	1	chr2	-	156077453-156077556;156077555-156077556	156077399-156077453;156077454-156077555;156077556-156077689	(156077454, 156077555)
Gm28039	ENSMUST00000149128	ENSMUST00000149128:106668882-106669002:target	-0.2751532844203129;0.27515328442031456	0.895252000989886;0.895252000989886	0.877;0.123	0.597;0.403	FALSE	FALSE	FALSE	1	2	1	chr5	-	106668756-106668882;106668881-106668882	106668746-106668756;106668757-106668881;106668882-106669002	(106668757, 106668881)
Gm28512	ENSMUST00000187415	ENSMUST00000187415:153750682-153751354:source	0.25094582281176286;-0.2509458228117613	0.8398693418057317;0.8398693418057317	0.324;0.676	0.581;0.419	FALSE	FALSE	FALSE	1	2	1	chr1	+	153751354-153751459;153751354-153751355	153750682-153751354;153751355-153751458;153751459-153751547	(153751355, 153751458)
Gm47283	ENSMUST00000177591	ENSMUST00000177591:90788060-90788548:target	-0.057953194939796816;0.025213260921614352;-0.022045503242264643;-0.03734284460934137;0.0013012122170398927;0.019851291341426318;0.15684376039851;0.0290509441427176;-0.004140678010889495;-0.09925249984579229	8.659654160020657e-05;2.6346992773195486e-15;1.5115717966207773e-17;1.4260509538560973e-14;1.303313224662375e-17;7.229890350132218e-16;0.34002135416029183;7.934758100831477e-08;1.300947186144199e-17;0.01746627821754056	0.189;0.025;0.051;0.076;0.027;0.025;0.237;0.098;0.031;0.245	0.118;0.056;0.025;0.037;0.029;0.051;0.408;0.137;0.025;0.130	TRUE	FALSE	TRUE	9	3	1	chrY	+	90787094-90788060;90787253-90788060;90787298-90788060;90787433-90788060;90787523-90788060;90787746-90788060;90787789-90788060;90787924-90788060;90787969-90788060;90788059-90788060	90786909-90787523;90786909-90787523;90786909-90787523;90786909-90787523;90786909-90787523;90787741-90787969;90787741-90787969;90787741-90787969;90787741-90787969;90787970-90788059;90788060-90788548	(90787970, 90788059)
Gm47283	ENSMUST00000177591	ENSMUST00000177591:90797970-90797980:source	-0.22536775475236168;0.22536775475236326	0.8440705896927805;0.8440705896927805	0.292;0.708	0.068;0.932	FALSE	FALSE	FALSE	1	2	1	chrY	+	90797980-90806020;90797980-90797981	90797970-90797980;90797981-90798015;90806020-90806030	(90797981, 90798015)
Gm47283	ENSMUST00000177591	ENSMUST00000177591:90803773-90804323:target	-0.3027871003123341;-0.03266124364189994;0.3450426439479816	0.9736549032117818;5.7461389984295585e-06;0.9930965100558934	0.371;0.071;0.558	0.074;0.032;0.895	FALSE	TRUE	TRUE	2	3	1	chrY	+	90801182-90803773;90801640-90804230;90803772-90803773	90800739-90801182;90801183-90801839;90803715-90803772;90803773-90804323	(90803715, 90803772)
Gmip	ENSMUST00000036074	ENSMUST00000036074:69810802-69810859:target	-0.23112860415629316;0.23112860415629474	0.7338617710181138;0.7338617710181138	0.900;0.100	0.651;0.349	FALSE	FALSE	FALSE	1	2	1	chr8	+	69810717-69810802;69810801-69810802	69810630-69810717;69810718-69810801;69810802-69810859	(69810718, 69810801)
Gmip	ENSMUST00000123453	ENSMUST00000123453:69810802-69810859:target	-0.23281602568863793;0.23281602568863943	0.7398937087322671;0.7398937087322671	0.900;0.100	0.649;0.351	FALSE	FALSE	FALSE	1	2	1	chr8	+	69810717-69810802;69810801-69810802	69810630-69810717;69810718-69810801;69810802-69810859	(69810718, 69810801)
Gps1	ENSMUST00000116305	ENSMUST00000116305:120788462-120788596:source	-0.20138399605773613;0.20138399605773769	0.6658577298090859;0.6658577298090859	0.750;0.250	0.543;0.457	FALSE	FALSE	FALSE	1	2	1	chr11	+	120788596-120788670;120788596-120788597	120788462-120788596;120788597-120788669;120788670-120789102	(120788597, 120788669)
Gps1	ENSMUST00000153678	ENSMUST00000153678:120788462-120788596:source	-0.20667883441441587;0.20667883441441745	0.6999422451056562;0.6999422451056562	0.752;0.248	0.540;0.460	FALSE	FALSE	FALSE	1	2	1	chr11	+	120788596-120788670;120788596-120788597	120788462-120788596;120788597-120788669;120788670-120788783	(120788597, 120788669)
Gps1	ENSMUST00000172809	ENSMUST00000172809:120788462-120788596:source	-0.20431989610695117;0.2043198961069527	0.6863061448649955;0.6863061448649955	0.749;0.251	0.540;0.460	FALSE	FALSE	FALSE	1	2	1	chr11	+	120788596-120788670;120788596-120788597	120788462-120788596;120788597-120788669;120788670-120789102	(120788597, 120788669)
Gps1	ENSMUST00000208737	ENSMUST00000208737:120788462-120788596:source	-0.20683612300822796;0.20683612300822948	0.7059413058697857;0.7059413058697857	0.750;0.250	0.538;0.462	FALSE	FALSE	FALSE	1	2	1	chr11	+	120788596-120788670;120788596-120788597	120788462-120788596;120788597-120788669;120788670-120789101	(120788597, 120788669)
Hbb-bt	ENSMUST00000098192	ENSMUST00000098192:103827448-103827670:target	-0.053424389392392406;7.771561172376096e-16;7.77001599734116e-16;0.26211344837758627;-0.043447201111254795;-0.054406780034045796;-0.012152962113406298;-0.05345210459846061;-0.03210569553197665;-4.435885030731054e-06;7.771561172376096e-16;-8.604687627824696e-10;-0.0013960067849482483	2.0905314354979354e-05;1.2530049526329672e-17;1.2530049526329672e-17;0.911457449176244;1.7725363702591238e-17;0.0006333161923986967;1.39371562877625e-17;3.5100408048417484e-06;6.43125294328409e-16;1.2530563123994949e-17;1.2530049526329672e-17;1.2530049625956954e-17;1.2691682608881487e-17	0.242;0.025;0.025;0.025;0.073;0.246;0.040;0.188;0.123;0.025;0.025;0.025;0.027	0.182;0.025;0.025;0.281;0.030;0.186;0.025;0.129;0.089;0.025;0.025;0.025;0.025	TRUE	TRUE	TRUE	13	5	1	chr7	-	103826793-103827448;103813504-103827448;103813627-103827638;103813572-103827594;103813815-103827583;103813572-103827583;103813815-103827562;103813551-103827562;103813815-103827561;103813544-103827555;103813827-103827538;103813519-103827530;103813484-103827495	103813236-103813719;103813236-103813719;103813236-103813719;103813236-103813719;103813236-103813719;103813236-103813719;103813236-103813719;103813236-103813719;103813778-103813996;103813778-103813996;103813778-103813996;103813778-103813996;103826755-103826793;103827448-103827670
Herc4	ENSMUST00000020258	ENSMUST00000020258:63316700-63316802:target	0.21864493398575166;-0.21864493398575016	0.8131893821112676;0.8131893821112676	0.039;0.961	0.259;0.741	FALSE	FALSE	TRUE	2	3	1	chr10	+	63314569-63316700;63315843-63316700	63314487-63314569;63315660-63315843;63316700-63316802
Herc4	ENSMUST00000020258	ENSMUST00000020258:63314487-63314569:source	-0.295990303925661;0.2959903039256625	0.962374033980538;0.962374033980538	0.881;0.119	0.588;0.412	FALSE	FALSE	TRUE	2	3	1	chr10	+	63314569-63315660;63314569-63316700	63314487-63314569;63315660-63315843;63316700-63316802
Hgs	ENSMUST00000026900	ENSMUST00000026900:120478462-120478605:target	0.27931800963315523;-0.2793180096331536	0.9392744367911835;0.9392744367911835	0.685;0.315	0.962;0.038	FALSE	FALSE	FALSE	1	2	1	chr11	+	120478374-120478462;120478461-120478462	120478336-120478374;120478375-120478461;120478462-120478605	(120478375, 120478461)
Hgs	ENSMUST00000106203	ENSMUST00000106203:120478462-120478605:target	0.2779009619211351;-0.2779009619211336	0.9379321948311196;0.9379321948311196	0.687;0.313	0.963;0.037	FALSE	FALSE	FALSE	1	2	1	chr11	+	120478374-120478462;120478461-120478462	120478336-120478374;120478375-120478461;120478462-120478605	(120478375, 120478461)
Hgs	ENSMUST00000106205	ENSMUST00000106205:120478462-120478605:target	0.2748363561606316;-0.27483635616062996	0.9316418293127795;0.9316418293127795	0.689;0.311	0.962;0.038	FALSE	FALSE	FALSE	1	2	1	chr11	+	120478374-120478462;120478461-120478462	120478336-120478374;120478375-120478461;120478462-120478605	(120478375, 120478461)
Hgs	ENSMUST00000135231	ENSMUST00000135231:120478462-120478605:target	0.2718475504566494;-0.2718475504566479	0.9235821825625543;0.9235821825625543	0.690;0.310	0.961;0.039	FALSE	FALSE	FALSE	1	2	1	chr11	+	120478374-120478462;120478461-120478462	120478336-120478374;120478375-120478461;120478462-120478605	(120478375, 120478461)
Irf9	ENSMUST00000130697	ENSMUST00000130697:55606537-55606608:target	-0.30584897550670226;0.3058489755067037	0.9698525809876496;0.9698525809876496	0.915;0.085	0.613;0.387	FALSE	FALSE	FALSE	1	2	1	chr14	+	55606438-55606537;55606536-55606537	55606318-55606438;55606439-55606536;55606537-55606608	(55606439, 55606536)
Irf9	ENSMUST00000134863	ENSMUST00000134863:55606537-55606608:target	-0.30210746137371264;0.30210746137371414	0.9633511164961812;0.9633511164961812	0.914;0.086	0.614;0.386	FALSE	FALSE	FALSE	1	2	1	chr14	+	55606438-55606537;55606536-55606537	55606318-55606438;55606439-55606536;55606537-55606608	(55606439, 55606536)
Irf9	ENSMUST00000138037	ENSMUST00000138037:55606537-55606608:target	-0.30713309714134834;0.3071330971413499	0.9700397256940508;0.9700397256940508	0.914;0.086	0.610;0.390	FALSE	FALSE	FALSE	1	2	1	chr14	+	55606438-55606537;55606536-55606537	55606318-55606438;55606439-55606536;55606537-55606608	(55606439, 55606536)
Khnyn	ENSMUST00000022831	ENSMUST00000022831:55887921-55888017:source	0.2793786083131463;-0.27937860831314487	0.9530945309314963;0.9530945309314963	0.030;0.970	0.308;0.692	FALSE	FALSE	TRUE	2	3	1	chr14	+	55888017-55888549;55888017-55893992	55887921-55888017;55888549-55888559;55893992-55894099
Malat1	ENSMUST00000174808	ENSMUST00000174808:5795694-5795785:source	0.2550010196104996;-0.2550010196104981	0.9329055529643157;0.9329055529643157	0.078;0.922	0.330;0.670	FALSE	FALSE	FALSE	1	2	1	chr19	-	5795785-5796389;5795785-5795786	5795694-5795785;5795786-5796388;5796389-5796952	(5795786, 5796388)
Map4k2	ENSMUST00000025897	ENSMUST00000025897:6342610-6342657:source	0.20951432427575964;-0.20951432427575806	0.7367268266001542;0.7367268266001542	0.700;0.300	0.914;0.086	FALSE	FALSE	FALSE	1	2	1	chr19	+	6342657-6342744;6342657-6342658	6342610-6342657;6342658-6342743;6342744-6342786	(6342658, 6342743)
Map4k2	ENSMUST00000123468	ENSMUST00000123468:6342610-6342657:source	0.2051299865307201;-0.20512998653071857	0.7155967936063707;0.7155967936063707	0.704;0.296	0.914;0.086	FALSE	FALSE	FALSE	1	2	1	chr19	+	6342657-6342744;6342657-6342658	6342610-6342657;6342658-6342743;6342744-6342786	(6342658, 6342743)
Map4k2	ENSMUST00000124556	ENSMUST00000124556:6342610-6342657:source	0.2092517705176095;-0.20925177051760785	0.7339099539157876;0.7339099539157876	0.700;0.300	0.914;0.086	FALSE	FALSE	FALSE	1	2	1	chr19	+	6342657-6342744;6342657-6342658	6342610-6342657;6342658-6342743;6342744-6342786	(6342658, 6342743)
Map4k2	ENSMUST00000130382	ENSMUST00000130382:6342610-6342657:source	0.2070823588820776;-0.20708235888207605	0.7225855146970341;0.7225855146970341	0.702;0.298	0.914;0.086	FALSE	FALSE	FALSE	1	2	1	chr19	+	6342657-6342744;6342657-6342658	6342610-6342657;6342658-6342743;6342744-6342786	(6342658, 6342743)
Map4k2	ENSMUST00000133696	ENSMUST00000133696:6342610-6342657:source	0.2065851694736214;-0.20658516947361982	0.7193300253800682;0.7193300253800682	0.704;0.296	0.915;0.085	FALSE	FALSE	FALSE	1	2	1	chr19	+	6342657-6342744;6342657-6342658	6342610-6342657;6342658-6342743;6342744-6342786	(6342658, 6342743)
Map4k2	ENSMUST00000142496	ENSMUST00000142496:6342610-6342657:source	0.2094248514431563;-0.20942485144315479	0.7349190754675711;0.7349190754675711	0.701;0.299	0.915;0.085	FALSE	FALSE	FALSE	1	2	1	chr19	+	6342657-6342744;6342657-6342658	6342610-6342657;6342658-6342743;6342744-6342786	(6342658, 6342743)
Map4k2	ENSMUST00000148410	ENSMUST00000148410:6342610-6342657:source	0.20739901895533402;-0.20739901895533247	0.7205506251845157;0.7205506251845157	0.702;0.298	0.914;0.086	FALSE	FALSE	FALSE	1	2	1	chr19	+	6342657-6342744;6342657-6342658	6342610-6342657;6342658-6342743;6342744-6342874	(6342658, 6342743)
Map4k2	ENSMUST00000152259	ENSMUST00000152259:6342610-6342657:source	0.20714627019218854;-0.20714627019218698	0.7141359546440819;0.7141359546440819	0.703;0.297	0.915;0.085	FALSE	FALSE	FALSE	1	2	1	chr19	+	6342657-6342744;6342657-6342658	6342610-6342657;6342658-6342743;6342744-6342786	(6342658, 6342743)
Map4k2	ENSMUST00000155569	ENSMUST00000155569:6342610-6342657:source	0.2093522669401431;-0.20935226694014156	0.7260700530359053;0.7260700530359053	0.700;0.300	0.914;0.086	FALSE	FALSE	FALSE	1	2	1	chr19	+	6342657-6342744;6342657-6342658	6342610-6342657;6342658-6342743;6342744-6342786	(6342658, 6342743)
Mapk8ip3	ENSMUST00000088345	ENSMUST00000088345:24899675-24899713:source	0.20815056690052036;-0.20815056690051884	0.6533659448501784;0.6533659448501784	0.656;0.344	0.884;0.116	FALSE	FALSE	FALSE	1	2	1	chr17	-	24899713-24899836;24899713-24899714	24899675-24899713;24899714-24899835;24899836-24899949	(24899714, 24899835)
Mapk8ip3	ENSMUST00000088345	ENSMUST00000088345:24904649-24904819:source	-0.27239372679881235;0.27239372679881385	0.8735855799124721;0.8735855799124721	0.751;0.249	0.471;0.529	FALSE	FALSE	FALSE	1	2	1	chr17	-	24904819-24904907;24904819-24904820	24904649-24904819;24904820-24904906;24904907-24904963	(24904820, 24904906)
Mapk8ip3	ENSMUST00000115228	ENSMUST00000115228:24899675-24899713:source	0.20667019267114947;-0.20667019267114795	0.6473301252793147;0.6473301252793147	0.657;0.343	0.884;0.116	FALSE	FALSE	FALSE	1	2	1	chr17	-	24899713-24899836;24899713-24899714	24899675-24899713;24899714-24899835;24899836-24899949	(24899714, 24899835)
Mapk8ip3	ENSMUST00000115228	ENSMUST00000115228:24904649-24904819:source	-0.26639125003100894;0.26639125003101055	0.8563051736736906;0.8563051736736906	0.750;0.250	0.475;0.525	FALSE	FALSE	FALSE	1	2	1	chr17	-	24904819-24904907;24904819-24904820	24904649-24904819;24904820-24904906;24904907-24904963	(24904820, 24904906)
Mapk8ip3	ENSMUST00000115229	ENSMUST00000115229:24899675-24899713:source	0.20611101992725317;-0.20611101992725164	0.6450335226907764;0.6450335226907764	0.658;0.342	0.884;0.116	FALSE	FALSE	FALSE	1	2	1	chr17	-	24899713-24899836;24899713-24899714	24899675-24899713;24899714-24899835;24899836-24899949	(24899714, 24899835)
Mapk8ip3	ENSMUST00000115229	ENSMUST00000115229:24904649-24904819:source	-0.2659654736591802;0.2659654736591818	0.857200042289025;0.857200042289025	0.750;0.250	0.476;0.524	FALSE	FALSE	FALSE	1	2	1	chr17	-	24904819-24904907;24904819-24904820	24904649-24904819;24904820-24904906;24904907-24904963	(24904820, 24904906)
Mapk8ip3	ENSMUST00000117509	ENSMUST00000117509:24899675-24899713:source	0.20790828896622576;-0.2079082889662243	0.6529302551293978;0.6529302551293978	0.656;0.344	0.884;0.116	FALSE	FALSE	FALSE	1	2	1	chr17	-	24899713-24899836;24899713-24899714	24899675-24899713;24899714-24899835;24899836-24899949	(24899714, 24899835)
Mapk8ip3	ENSMUST00000117509	ENSMUST00000117509:24904649-24904819:source	-0.26796939060652725;0.2679693906065288	0.8604239141017284;0.8604239141017284	0.751;0.249	0.475;0.525	FALSE	FALSE	FALSE	1	2	1	chr17	-	24904819-24904907;24904819-24904820	24904649-24904819;24904820-24904906;24904907-24904963	(24904820, 24904906)
Mapk8ip3	ENSMUST00000119115	ENSMUST00000119115:24904649-24904819:source	-0.26631045006950943;0.266310450069511	0.8536698427752494;0.8536698427752494	0.750;0.250	0.475;0.525	FALSE	FALSE	FALSE	1	2	1	chr17	-	24904819-24904907;24904819-24904820	24904649-24904819;24904820-24904906;24904907-24904963	(24904820, 24904906)
Mapk8ip3	ENSMUST00000119115	ENSMUST00000119115:24899675-24899713:source	0.2072641857013644;-0.20726418570136282	0.6495438334801042;0.6495438334801042	0.658;0.342	0.885;0.115	FALSE	FALSE	FALSE	1	2	1	chr17	-	24899713-24899836;24899713-24899714	24899675-24899713;24899714-24899835;24899836-24899949	(24899714, 24899835)
Mapk8ip3	ENSMUST00000120035	ENSMUST00000120035:24904649-24904819:source	-0.26638584524922393;0.26638584524922554	0.8544155538792269;0.8544155538792269	0.752;0.248	0.478;0.522	FALSE	FALSE	FALSE	1	2	1	chr17	-	24904819-24904907;24904819-24904820	24904649-24904819;24904820-24904906;24904907-24904963	(24904820, 24904906)
Mapk8ip3	ENSMUST00000120035	ENSMUST00000120035:24899675-24899713:source	0.20619270947812537;-0.2061927094781238	0.6463484451984204;0.6463484451984204	0.658;0.342	0.885;0.115	FALSE	FALSE	FALSE	1	2	1	chr17	-	24899713-24899836;24899713-24899714	24899675-24899713;24899714-24899835;24899836-24899949	(24899714, 24899835)
Mapk8ip3	ENSMUST00000121723	ENSMUST00000121723:24899675-24899713:source	0.21150824883587402;-0.2115082488358725	0.6697056092405846;0.6697056092405846	0.656;0.344	0.886;0.114	FALSE	FALSE	FALSE	1	2	1	chr17	-	24899713-24899836;24899713-24899714	24899675-24899713;24899714-24899835;24899836-24899949	(24899714, 24899835)
Mapk8ip3	ENSMUST00000121723	ENSMUST00000121723:24904649-24904819:source	-0.2671629866222484;0.26716298662225	0.8574259286074977;0.8574259286074977	0.750;0.250	0.475;0.525	FALSE	FALSE	FALSE	1	2	1	chr17	-	24904819-24904907;24904819-24904820	24904649-24904819;24904820-24904906;24904907-24904963	(24904820, 24904906)
Mapk8ip3	ENSMUST00000121787	ENSMUST00000121787:24904649-24904819:source	-0.26892392979471935;0.2689239297947209	0.8690200273026429;0.8690200273026429	0.751;0.249	0.475;0.525	FALSE	FALSE	FALSE	1	2	1	chr17	-	24904819-24904907;24904819-24904820	24904649-24904819;24904820-24904906;24904907-24904963	(24904820, 24904906)
Mapk8ip3	ENSMUST00000121787	ENSMUST00000121787:24899675-24899713:source	0.2067336033097901;-0.20673360330978857	0.6453227602574447;0.6453227602574447	0.657;0.343	0.884;0.116	FALSE	FALSE	FALSE	1	2	1	chr17	-	24899713-24899836;24899713-24899714	24899675-24899713;24899714-24899835;24899836-24899949	(24899714, 24899835)
Mapk8ip3	ENSMUST00000146923	ENSMUST00000146923:24899675-24899713:source	0.20685375928474808;-0.20685375928474656	0.6473144950380141;0.6473144950380141	0.657;0.343	0.884;0.116	FALSE	FALSE	FALSE	1	2	1	chr17	-	24899713-24899836;24899713-24899714	24899675-24899713;24899714-24899835;24899836-24899949	(24899714, 24899835)
Mapk8ip3	ENSMUST00000146923	ENSMUST00000146923:24904649-24904819:source	-0.2664726151526915;0.266472615152693	0.8565476466036862;0.8565476466036862	0.749;0.251	0.474;0.526	FALSE	FALSE	FALSE	1	2	1	chr17	-	24904819-24904907;24904819-24904820	24904649-24904819;24904820-24904906;24904907-24904963	(24904820, 24904906)
Mapk8ip3	ENSMUST00000178969	ENSMUST00000178969:24899675-24899713:source	0.20819511745282074;-0.20819511745281916	0.6553779278912061;0.6553779278912061	0.655;0.345	0.883;0.117	FALSE	FALSE	FALSE	1	2	1	chr17	-	24899713-24899836;24899713-24899714	24899675-24899713;24899714-24899835;24899836-24899949	(24899714, 24899835)
Mapk8ip3	ENSMUST00000178969	ENSMUST00000178969:24904649-24904819:source	-0.26677956372208383;0.2667795637220855	0.8521119310266222;0.8521119310266222	0.750;0.250	0.475;0.525	FALSE	FALSE	FALSE	1	2	1	chr17	-	24904819-24904907;24904819-24904820	24904649-24904819;24904820-24904906;24904907-24904963	(24904820, 24904906)
Mtcp1	ENSMUST00000033542	ENSMUST00000033542:75411352-75411522:source	0.21955258362314606;-0.21955258362314448	0.6442550827166645;0.6442550827166645	0.486;0.514	0.743;0.257	FALSE	FALSE	FALSE	1	2	1	chrX	-	75411522-75411635;75411522-75411523	75411352-75411522;75411523-75411634;75411635-75411786	(75411523, 75411634)
Mtcp1	ENSMUST00000114081	ENSMUST00000114081:75411352-75411522:source	0.21624914853794308;-0.21624914853794147	0.6323582777331141;0.6323582777331141	0.487;0.513	0.742;0.258	FALSE	FALSE	FALSE	1	2	1	chrX	-	75411522-75411635;75411522-75411523	75411352-75411522;75411523-75411634;75411635-75411786	(75411523, 75411634)
Mtpap	ENSMUST00000025077	ENSMUST00000025077:4396105-4397330:target	0.2580772483200779;-0.2580772483200764	0.9581148045191439;0.9581148045191439	0.028;0.972	0.284;0.716	FALSE	FALSE	TRUE	2	3	1	chr18	+	4395066-4396105;4395229-4396105	4394974-4395066;4395156-4395229;4396105-4397330
Mtpap	ENSMUST00000025077	ENSMUST00000025077:4394974-4395066:source	-0.3123502106165576;0.3123502106165592	0.9913960061429277;0.9913960061429277	0.964;0.036	0.658;0.342	FALSE	FALSE	TRUE	2	3	1	chr18	+	4395066-4395156;4395066-4396105	4394974-4395066;4395156-4395229;4396105-4397330
Ndor1	ENSMUST00000100329	ENSMUST00000100329:25244821-25247854:source	-0.2672538711181742;0.2672538711181757	0.8321717521096592;0.8321717521096592	0.821;0.179	0.540;0.460	FALSE	FALSE	FALSE	1	2	1	chr2	-	25247854-25247960;25247854-25247855	25244821-25247854;25247855-25247959;25247960-25248054	(25247855, 25247959)
Ndor1	ENSMUST00000114349	ENSMUST00000114349:25247229-25247854:source	-0.2768091740111757;0.2768091740111773	0.8592454610994097;0.8592454610994097	0.821;0.179	0.534;0.466	FALSE	FALSE	FALSE	1	2	1	chr2	-	25247854-25247960;25247854-25247855	25247229-25247854;25247855-25247959;25247960-25248054	(25247855, 25247959)
Ndor1	ENSMUST00000129705	ENSMUST00000129705:25247587-25247854:source	-0.2735515703529586;0.2735515703529601	0.8522620453876223;0.8522620453876223	0.822;0.178	0.537;0.463	FALSE	FALSE	FALSE	1	2	1	chr2	-	25247854-25247960;25247854-25247855	25247587-25247854;25247855-25247959;25247960-25248054	(25247855, 25247959)
Ndor1	ENSMUST00000148589	ENSMUST00000148589:25247428-25247854:source	-0.2724214207845525;0.27242142078455406	0.8474913326382548;0.8474913326382548	0.821;0.179	0.537;0.463	FALSE	FALSE	FALSE	1	2	1	chr2	-	25247854-25247960;25247854-25247855	25247428-25247854;25247855-25247959;25247960-25248485	(25247855, 25247959)
Nrf1	ENSMUST00000133928	ENSMUST00000133928:30061540-30061550:source	0.5303380756431174;-0.530338075643116	0.9999998814141244;0.9999998814141244	0.025;0.975	0.543;0.457	FALSE	FALSE	FALSE	1	2	1	chr6	+	30061550-30061631;30061550-30061551	30061540-30061550;30061551-30061630;30061631-30061641	(30061551, 30061630)
Nup214	ENSMUST00000065398	ENSMUST00000065398:31991264-31991425:source	0.21183898863175152;-0.21183898863174996	0.7050449784063508;0.7050449784063508	0.047;0.953	0.270;0.730	FALSE	FALSE	TRUE	2	3	1	chr2	+	31991425-31992910;31991425-31994523	31991264-31991425;31992910-31992920;31994523-31994976
Pcnt	ENSMUST00000001179	ENSMUST00000001179:76374620-76375300:target	-0.55570439055435;0.5557043905543518	0.9999953101659735;0.9999953101659735	0.891;0.109	0.350;0.650	TRUE	TRUE	FALSE	2	2	1	chr10	-	76370079-76374851;76370079-76374620	76369835-76370079;76369835-76370079;76374620-76375300
Phf20l1	ENSMUST00000048188	ENSMUST00000048188:66623992-66624099:target	-0.17606847946494833;0.288043431812747;-0.06409346693595398	0.48200980711272934;0.9881275859281711;0.016929220921351896	0.383;0.116;0.501	0.192;0.399;0.408	FALSE	FALSE	TRUE	2	3	1	chr15	+	66622817-66623992;66623883-66623992;66623991-66623992	66622761-66622817;66623761-66623883;66623884-66623991;66623992-66624099	(66623884, 66623991)
Phf20l1	ENSMUST00000048188	ENSMUST00000048188:66623761-66623883:source	0.23937016245359455;-0.23937016245359302	0.7896211477364797;0.7896211477364797	0.258;0.742	0.507;0.493	FALSE	FALSE	FALSE	1	2	1	chr15	+	66623883-66623992;66623883-66623884	66623761-66623883;66623884-66623991;66623992-66624099	(66623884, 66623991)
Ppp1r12a	ENSMUST00000070663	ENSMUST00000070663:108252757-108252924:source	0.2820661767136958;-0.2820661767136944	0.8958438012195357;0.8958438012195357	0.250;0.750	0.537;0.463	FALSE	FALSE	TRUE	2	3	1	chr10	+	108252924-108253325;108252924-108259756	108252757-108252924;108253325-108253495;108259756-108259846
Ppp1r12a	ENSMUST00000070663	ENSMUST00000070663:108253325-108253495:target	-0.3018078852703014;0.30180788527030306	0.8988890164058083;0.8988890164058083	0.668;0.332	0.360;0.640	FALSE	FALSE	TRUE	2	3	1	chr10	+	108251944-108253325;108252924-108253325	108251840-108251944;108252757-108252924;108253325-108253495
Prpf39	ENSMUST00000129956	ENSMUST00000129956:65055638-65055764:target	0.23356892042483582;-0.23356892042483435	0.7681479047996655;0.7681479047996655	0.218;0.782	0.464;0.536	FALSE	FALSE	FALSE	1	2	1	chr12	+	65055533-65055638;65055637-65055638	65055434-65055533;65055534-65055637;65055638-65055764	(65055534, 65055637)
Ptma	ENSMUST00000186255	ENSMUST00000186255:86529731-86529804:target	0.25028835072678723;-0.25028835072678574	0.9337764295720847;0.9337764295720847	0.232;0.768	0.480;0.520	FALSE	FALSE	FALSE	1	2	1	chr1	+	86529244-86529731;86529730-86529731	86529173-86529244;86529245-86529730;86529731-86529804	(86529245, 86529730)
Ptov1	ENSMUST00000046575	ENSMUST00000046575:44864762-44864835:target	0.20461658190778031;-0.2046165819077787	0.625676805121181;0.625676805121181	0.687;0.313	0.913;0.087	FALSE	FALSE	FALSE	1	2	1	chr7	-	44864669-44864762;44864761-44864762	44864612-44864669;44864670-44864761;44864762-44864835	(44864670, 44864761)
Ptov1	ENSMUST00000046575	ENSMUST00000046575:44864612-44864669:source	0.24818986639863827;-0.24818986639863674	0.7942828188817269;0.7942828188817269	0.531;0.469	0.793;0.207	FALSE	FALSE	FALSE	1	2	1	chr7	-	44864669-44864762;44864669-44864670	44864612-44864669;44864670-44864761;44864762-44864835	(44864670, 44864761)
Ptov1	ENSMUST00000207303	ENSMUST00000207303:44864612-44864669:source	0.25156247118499425;-0.25156247118499275	0.8086414251067613;0.8086414251067613	0.529;0.471	0.794;0.206	FALSE	FALSE	FALSE	1	2	1	chr7	-	44864669-44864762;44864669-44864670	44864612-44864669;44864670-44864761;44864762-44865002	(44864670, 44864761)
Ptov1	ENSMUST00000207303	ENSMUST00000207303:44864762-44865002:target	0.2001979146658803;-0.20019791466587872	0.6059006966926778;0.6059006966926778	0.690;0.310	0.913;0.087	FALSE	FALSE	FALSE	1	2	1	chr7	-	44864669-44864762;44864761-44864762	44864612-44864669;44864670-44864761;44864762-44865002	(44864670, 44864761)
Ptov1	ENSMUST00000207393	ENSMUST00000207393:44864612-44864669:source	0.24571339123595504;-0.2457133912359535	0.7854964863834494;0.7854964863834494	0.531;0.469	0.792;0.208	FALSE	FALSE	FALSE	1	2	1	chr7	-	44864669-44864762;44864669-44864670	44864612-44864669;44864670-44864761;44864762-44865002	(44864670, 44864761)
Ptov1	ENSMUST00000207393	ENSMUST00000207393:44864762-44865002:target	0.20546033613331907;-0.20546033613331754	0.6309013113526459;0.6309013113526459	0.688;0.312	0.915;0.085	FALSE	FALSE	FALSE	1	2	1	chr7	-	44864669-44864762;44864761-44864762	44864612-44864669;44864670-44864761;44864762-44865002	(44864670, 44864761)
Ptov1	ENSMUST00000207416	ENSMUST00000207416:44864762-44864835:target	0.20483259863636227;-0.2048325986363607	0.6288513640830348;0.6288513640830348	0.689;0.311	0.915;0.085	FALSE	FALSE	FALSE	1	2	1	chr7	-	44864669-44864762;44864761-44864762	44864612-44864669;44864670-44864761;44864762-44864835	(44864670, 44864761)
Ptov1	ENSMUST00000207416	ENSMUST00000207416:44864612-44864669:source	0.25092634877500786;-0.25092634877500625	0.8054789223698166;0.8054789223698166	0.530;0.470	0.794;0.206	FALSE	FALSE	FALSE	1	2	1	chr7	-	44864669-44864762;44864669-44864670	44864612-44864669;44864670-44864761;44864762-44864835	(44864670, 44864761)
Ptov1	ENSMUST00000208410	ENSMUST00000208410:44864762-44864835:target	0.20234702710348773;-0.20234702710348618	0.6152827195809685;0.6152827195809685	0.690;0.310	0.914;0.086	FALSE	FALSE	FALSE	1	2	1	chr7	-	44864669-44864762;44864761-44864762	44864612-44864669;44864670-44864761;44864762-44864835	(44864670, 44864761)
Ptov1	ENSMUST00000208410	ENSMUST00000208410:44864612-44864669:source	0.250529145515338;-0.2505291455153364	0.8014416251122911;0.8014416251122911	0.530;0.470	0.794;0.206	FALSE	FALSE	FALSE	1	2	1	chr7	-	44864669-44864762;44864669-44864670	44864612-44864669;44864670-44864761;44864762-44864835	(44864670, 44864761)
Ptov1	ENSMUST00000208765	ENSMUST00000208765:44863975-44864669:source	0.24946662178899545;-0.2494666217889939	0.8027972125977412;0.8027972125977412	0.531;0.469	0.794;0.206	FALSE	FALSE	FALSE	1	2	1	chr7	-	44864669-44864762;44864669-44864670	44863975-44864669;44864670-44864761;44864762-44864835	(44864670, 44864761)
Ptov1	ENSMUST00000208765	ENSMUST00000208765:44864762-44864835:target	0.20686288395032515;-0.20686288395032354	0.6364255403518567;0.6364255403518567	0.687;0.313	0.915;0.085	FALSE	FALSE	FALSE	1	2	1	chr7	-	44864669-44864762;44864761-44864762	44863975-44864669;44864670-44864761;44864762-44864835	(44864670, 44864761)
Ptov1	ENSMUST00000208991	ENSMUST00000208991:44864612-44864669:source	0.24474868066314515;-0.24474868066314354	0.7776395369579867;0.7776395369579867	0.532;0.468	0.792;0.208	FALSE	FALSE	FALSE	1	2	1	chr7	-	44864669-44864762;44864669-44864670	44864612-44864669;44864670-44864761;44864762-44864835	(44864670, 44864761)
Ptov1	ENSMUST00000208991	ENSMUST00000208991:44864762-44864835:target	0.20420362728642896;-0.2042036272864274	0.6241970357359132;0.6241970357359132	0.689;0.311	0.915;0.085	FALSE	FALSE	FALSE	1	2	1	chr7	-	44864669-44864762;44864761-44864762	44864612-44864669;44864670-44864761;44864762-44864835	(44864670, 44864761)
Rab3gap2	ENSMUST00000069652	ENSMUST00000069652:185266901-185267074:source	0.21942316119662514;-0.21942316119662364	0.694040237046399;0.694040237046399	0.628;0.372	0.866;0.134	FALSE	FALSE	FALSE	1	2	1	chr1	+	185267074-185267173;185267074-185267075	185266901-185267074;185267075-185267172;185267173-185267279	(185267075, 185267172)
Rbl1	ENSMUST00000124518	ENSMUST00000124518:157185658-157185668:source	0.2636039283329069;-0.26360392833290536	0.9451867714423686;0.9451867714423686	0.025;0.975	0.287;0.713	FALSE	FALSE	FALSE	1	2	1	chr2	-	157185668-157185702;157185668-157185669	157185658-157185668;157185669-157185701;157185702-157185712	(157185669, 157185701)
Rbm25	ENSMUST00000182347	ENSMUST00000182347:83642629-83642698:target	0.2529446132032725;-0.25294461320327094	0.8549437561276163;0.8549437561276163	0.361;0.639	0.619;0.381	FALSE	FALSE	FALSE	1	2	1	chr12	+	83642519-83642629;83642628-83642629	83642402-83642519;83642520-83642628;83642629-83642698	(83642520, 83642628)
Rbm25	ENSMUST00000182618	ENSMUST00000182618:83642629-83642749:target	0.25943215070545195;-0.2594321507054504	0.8824882665810386;0.8824882665810386	0.360;0.640	0.622;0.378	FALSE	FALSE	FALSE	1	2	1	chr12	+	83642519-83642629;83642628-83642629	83642402-83642519;83642520-83642628;83642629-83642749	(83642520, 83642628)
Rbm25	ENSMUST00000182633	ENSMUST00000182633:83642629-83642749:target	0.256056982207106;-0.2560569822071045	0.8710799374053122;0.8710799374053122	0.361;0.639	0.621;0.379	FALSE	FALSE	FALSE	1	2	1	chr12	+	83642519-83642629;83642628-83642629	83642402-83642519;83642520-83642628;83642629-83642749	(83642520, 83642628)
Rbm25	ENSMUST00000183154	ENSMUST00000183154:83642629-83642749:target	0.2505422444874559;-0.2505422444874543	0.8485260485067619;0.8485260485067619	0.361;0.639	0.617;0.383	FALSE	FALSE	FALSE	1	2	1	chr12	+	83642519-83642629;83642628-83642629	83642402-83642519;83642520-83642628;83642629-83642749	(83642520, 83642628)
Rbm7	ENSMUST00000170000	ENSMUST00000170000:48494019-48494181:source	-0.3345965161865212;0.27172462943437947;0.04482372172909025	0.9965336797165102;0.964293668377036;5.6569663366425796e-05	0.792;0.098;0.109	0.465;0.366;0.169	FALSE	FALSE	TRUE	2	3	1	chr9	-	48494181-48495155;48494181-48494283;48494181-48494182	48494019-48494181;48494182-48494282;48494283-48494387;48495155-48495330	(48494182, 48494282)
Rbm7	ENSMUST00000170000	ENSMUST00000170000:48494283-48494387:target	0.30052152690472217;-0.3005215269047205	0.9070376571467869;0.9070376571467869	0.334;0.666	0.640;0.360	FALSE	FALSE	FALSE	1	2	1	chr9	-	48494181-48494283;48494282-48494283	48494019-48494181;48494182-48494282;48494283-48494387	(48494182, 48494282)
Rbm7	ENSMUST00000170000	ENSMUST00000170000:48495155-48495330:target	0.2393415530133325;-0.23934155301333085	0.839197359854684;0.839197359854684	0.159;0.841	0.401;0.599	FALSE	FALSE	TRUE	2	3	1	chr9	-	48494387-48495155;48494181-48495155	48494019-48494181;48494283-48494387;48495155-48495330
Ric8a	ENSMUST00000026558	ENSMUST00000026558:140861073-140861217:source	0.20736213630024888;-0.2073621363002473	0.700433745727394;0.700433745727394	0.743;0.257	0.958;0.042	FALSE	FALSE	FALSE	1	2	1	chr7	+	140861217-140861296;140861217-140861218	140861073-140861217;140861218-140861295;140861296-140861440	(140861218, 140861295)
Ric8a	ENSMUST00000123925	ENSMUST00000123925:140861073-140861217:source	0.20674509259000134;-0.2067450925899998	0.6958470603718858;0.6958470603718858	0.743;0.257	0.957;0.043	FALSE	FALSE	FALSE	1	2	1	chr7	+	140861217-140861296;140861217-140861218	140861073-140861217;140861218-140861295;140861296-140861440	(140861218, 140861295)
Rnf123	ENSMUST00000047746	ENSMUST00000047746:108051677-108051960:source	0.2841628660106832;-0.28416286601068175	0.9561963353059149;0.9561963353059149	0.395;0.605	0.677;0.323	FALSE	FALSE	FALSE	1	2	1	chr9	-	108051960-108052035;108051960-108051961	108051677-108051960;108051961-108052034;108052035-108052120	(108051961, 108052034)
Rnf123	ENSMUST00000160249	ENSMUST00000160249:108051534-108051960:source	0.28102358364237223;-0.28102358364237073	0.9544808490995786;0.9544808490995786	0.398;0.602	0.677;0.323	FALSE	FALSE	FALSE	1	2	1	chr9	-	108051960-108052035;108051960-108051961	108051534-108051960;108051961-108052034;108052035-108052120	(108051961, 108052034)
Rnf123	ENSMUST00000161673	ENSMUST00000161673:108051677-108051960:source	0.28211912677215917;-0.2821191267721577	0.9570561130752169;0.9570561130752169	0.394;0.606	0.673;0.327	FALSE	FALSE	FALSE	1	2	1	chr9	-	108051960-108052035;108051960-108051961	108051677-108051960;108051961-108052034;108052035-108052120	(108051961, 108052034)
Rnf123	ENSMUST00000162355	ENSMUST00000162355:108051672-108051960:source	0.28127691327448734;-0.2812769132744858	0.9521428776534158;0.9521428776534158	0.395;0.605	0.674;0.326	FALSE	FALSE	FALSE	1	2	1	chr9	-	108051960-108052035;108051960-108051961	108051672-108051960;108051961-108052034;108052035-108052120	(108051961, 108052034)
Rnf123	ENSMUST00000178267	ENSMUST00000178267:108051677-108051960:source	0.28192859241054397;-0.28192859241054236	0.9569634295174485;0.9569634295174485	0.394;0.606	0.673;0.327	FALSE	FALSE	FALSE	1	2	1	chr9	-	108051960-108052035;108051960-108051961	108051677-108051960;108051961-108052034;108052035-108052120	(108051961, 108052034)
Rrbp1	ENSMUST00000016072	ENSMUST00000016072:143985025-143985035:source	0.373109797811119;-0.37310979781111764	0.9968560864574767;0.9968560864574767	0.050;0.950	0.415;0.585	FALSE	FALSE	FALSE	1	2	1	chr2	-	143985035-143985137;143985035-143985036	143985025-143985035;143985036-143985136;143985137-143985147	(143985036, 143985136)
Sbno2	ENSMUST00000042771	ENSMUST00000042771:80058637-80058732:source	-0.010000020134590285;-0.1803732910791956;0.20508001942733986	4.1922946252813016e-07;0.5003486219191391;0.6322098299916739	0.050;0.861;0.088	0.039;0.646;0.315	TRUE	TRUE	FALSE	2	2	1	chr10	-	80058732-80058805;80058729-80058805;80058732-80058733	80058637-80058732;80058733-80058804;80058805-80058899;80058805-80058899	(80058733, 80058804)
Senp2	ENSMUST00000023561	ENSMUST00000023561:22032104-22032164:source	-0.3024770575355224;0.30247705753552395	0.9956200335841917;0.9956200335841917	0.327;0.673	0.032;0.968	FALSE	FALSE	TRUE	2	3	1	chr16	+	22032164-22033371;22032164-22036470	22032104-22032164;22033371-22033381;22036470-22036646
Sfr1	ENSMUST00000099353	ENSMUST00000099353:47732630-47732988:target	-0.02749633494605739;-0.035082468160182394;0.07618235326013359;-0.1675479648487473;0.12725280406147582	0.00011115931073005301;1.2082164793087749e-05;0.025501970137342296;0.3860492687801247;0.2083900909428544	0.186;0.095;0.218;0.245;0.255	0.145;0.049;0.327;0.065;0.414	TRUE	TRUE	TRUE	5	3	1	chr19	+	47731821-47732630;47732734-47732831;47732782-47732831;47732830-47732879;47732878-47732927	47731756-47731821;47732630-47732988
Sh2b1	ENSMUST00000032978	ENSMUST00000032978:126471122-126471297:source	-0.24660072231905195;0.24660072231905353	0.826819689331401;0.826819689331401	0.935;0.065	0.680;0.320	FALSE	FALSE	FALSE	1	2	1	chr7	-	126471297-126471395;126471297-126471298	126471122-126471297;126471298-126471394;126471395-126471486	(126471298, 126471394)
Sh2b1	ENSMUST00000205340	ENSMUST00000205340:126471122-126471297:source	-0.24731790505775902;0.2473179050577606	0.8294053124102845;0.8294053124102845	0.936;0.064	0.680;0.320	FALSE	FALSE	FALSE	1	2	1	chr7	-	126471297-126471395;126471297-126471298	126471122-126471297;126471298-126471394;126471395-126471486	(126471298, 126471394)
Sh2b1	ENSMUST00000205440	ENSMUST00000205440:126471122-126471297:source	-0.247004493374042;0.2470044933740436	0.8292643278708945;0.8292643278708945	0.935;0.065	0.680;0.320	FALSE	FALSE	FALSE	1	2	1	chr7	-	126471297-126471395;126471297-126471298	126471122-126471297;126471298-126471394;126471395-126471486	(126471298, 126471394)
Sh2b1	ENSMUST00000205497	ENSMUST00000205497:126471122-126471297:source	-0.2414853129855492;0.2414853129855507	0.8096025275112969;0.8096025275112969	0.935;0.065	0.684;0.316	FALSE	FALSE	FALSE	1	2	1	chr7	-	126471297-126471395;126471297-126471298	126471122-126471297;126471298-126471394;126471395-126471486	(126471298, 126471394)
Sh2b1	ENSMUST00000205733	ENSMUST00000205733:126471122-126471297:source	-0.24420609320763;0.24420609320763156	0.818996355652183;0.818996355652183	0.936;0.064	0.682;0.318	FALSE	FALSE	FALSE	1	2	1	chr7	-	126471297-126471395;126471297-126471298	126471122-126471297;126471298-126471394;126471395-126471486	(126471298, 126471394)
Sh2b1	ENSMUST00000205889	ENSMUST00000205889:126471122-126471297:source	-0.24131275970864255;0.24131275970864408	0.8104577984400065;0.8104577984400065	0.935;0.065	0.684;0.316	FALSE	FALSE	FALSE	1	2	1	chr7	-	126471297-126471395;126471297-126471298	126471122-126471297;126471298-126471394;126471395-126471486	(126471298, 126471394)
Sh2b1	ENSMUST00000206664	ENSMUST00000206664:126471122-126471297:source	-0.24439343601299163;0.24439343601299315	0.8217676095992299;0.8217676095992299	0.935;0.065	0.682;0.318	FALSE	FALSE	FALSE	1	2	1	chr7	-	126471297-126471395;126471297-126471298	126471122-126471297;126471298-126471394;126471395-126471486	(126471298, 126471394)
Slc50a1	ENSMUST00000029565	ENSMUST00000029565:89269827-89269950:source	0.20450140259244684;-0.20450140259244534	0.6213346757173182;0.6213346757173182	0.438;0.562	0.668;0.332	FALSE	FALSE	FALSE	1	2	1	chr3	-	89269950-89270062;89269950-89269951	89269827-89269950;89269951-89270061;89270062-89270139	(89269951, 89270061)
Slc50a1	ENSMUST00000107460	ENSMUST00000107460:89269827-89269950:source	0.21113797629487388;-0.2111379762948724	0.6505565249703338;0.6505565249703338	0.436;0.564	0.671;0.329	FALSE	FALSE	FALSE	1	2	1	chr3	-	89269950-89270062;89269950-89269951	89269827-89269950;89269951-89270061;89270062-89270139	(89269951, 89270061)
Slc50a1	ENSMUST00000130230	ENSMUST00000130230:89269827-89269950:source	0.20099689496538467;-0.20099689496538312	0.6030996933118714;0.6030996933118714	0.440;0.560	0.668;0.332	FALSE	FALSE	FALSE	1	2	1	chr3	-	89269950-89270062;89269950-89269951	89269827-89269950;89269951-89270061;89270062-89270139	(89269951, 89270061)
Slc50a1	ENSMUST00000130690	ENSMUST00000130690:89269827-89269950:source	0.20834371180494085;-0.2083437118049393	0.6397987847168752;0.6397987847168752	0.436;0.564	0.669;0.331	FALSE	FALSE	FALSE	1	2	1	chr3	-	89269950-89270062;89269950-89269951	89269827-89269950;89269951-89270061;89270062-89270227	(89269951, 89270061)
Slc6a6	ENSMUST00000032185	ENSMUST00000032185:91741178-91741302:target	0.25796717980649525;-0.25796717980649364	0.8390026208764482;0.8390026208764482	0.640;0.360	0.906;0.094	FALSE	FALSE	FALSE	1	2	1	chr6	+	91741052-91741178;91741177-91741178	91740949-91741052;91741053-91741177;91741178-91741302	(91741053, 91741177)
Slc7a6os	ENSMUST00000035925	ENSMUST00000035925:106204331-106204540:target	-0.28023132679494933;0.2802313267949509	0.915089738298969;0.915089738298969	0.415;0.585	0.133;0.867	FALSE	TRUE	FALSE	2	2	1	chr8	-	106202359-106204331;106202351-106204331	106202231-106202359;106202231-106202359;106204331-106204540
Smc5	ENSMUST00000087556	ENSMUST00000087556:23214642-23214740:source	-0.3175481730523493;0.3175481730523508	0.9738337803053186;0.9738337803053186	0.427;0.573	0.114;0.886	FALSE	FALSE	TRUE	2	3	1	chr19	-	23214740-23218405;23214740-23215155	23214642-23214740;23215155-23215199;23218405-23218530
Smg6	ENSMUST00000045281	ENSMUST00000045281:74928993-74930748:target	-0.23383317473040574;0.2338331747304073	0.8044801910700884;0.8044801910700884	0.957;0.043	0.716;0.284	FALSE	FALSE	TRUE	2	3	1	chr11	+	74926003-74928993;74928765-74928993	74925823-74926003;74928755-74928765;74928993-74930748
Son	ENSMUST00000119368	ENSMUST00000119368:91664920-91665708:target	0.20691083807167748;-0.20691083807167596	0.6281824452774871;0.6281824452774871	0.467;0.533	0.703;0.297	FALSE	FALSE	FALSE	1	2	1	chr16	+	91664822-91664920;91664919-91664920	91664634-91664822;91664823-91664919;91664920-91665708	(91664823, 91664919)
Spidr	ENSMUST00000040248	ENSMUST00000040248:15968528-15968717:target	-0.2049194725439662;0.20491947254396772	0.6191874656250899;0.6191874656250899	0.936;0.064	0.704;0.296	FALSE	FALSE	TRUE	2	3	1	chr16	-	15966852-15968528;15936693-15968528	15936553-15936693;15966602-15966852;15968528-15968717
Spta1	ENSMUST00000027817	ENSMUST00000027817:174204777-174204787:source	-0.36177053924980185;0.3617705392498035	0.9923161824610582;0.9923161824610582	0.792;0.208	0.438;0.562	FALSE	FALSE	FALSE	1	2	1	chr1	+	174204787-174204813;174204787-174204788	174204777-174204787;174204788-174204812;174204813-174205408	(174204788, 174204812)
Tbc1d10c	ENSMUST00000045864	ENSMUST00000045864:4184358-4185073:source	0.2351721975572312;-0.23517219755722965	0.8290244372583224;0.8290244372583224	0.038;0.962	0.278;0.722	FALSE	FALSE	TRUE	2	3	1	chr19	-	4185073-4188944;4185073-4185352	4184358-4185073;4185352-4185506;4188944-4189058
Tespa1	ENSMUST00000042586	ENSMUST00000042586:130347144-130347350:target	-0.23576080054480913;0.2357608005448107	0.8089122519539157;0.8089122519539157	0.284;0.716	0.042;0.958	FALSE	FALSE	TRUE	2	3	1	chr10	+	130322969-130347144;130331153-130347144	130322852-130322969;130330982-130331153;130347144-130347350
Timeless	ENSMUST00000055539	ENSMUST00000055539:128240138-128240291:source	-0.21606995903240866;0.21606995903241025	0.7941559351495423;0.7941559351495423	0.965;0.035	0.746;0.254	FALSE	FALSE	FALSE	1	2	1	chr10	+	128240291-128240380;128240291-128240292	128240138-128240291;128240292-128240379;128240380-128240494	(128240292, 128240379)
Timeless	ENSMUST00000105242	ENSMUST00000105242:128240138-128240291:source	-0.2125255245410543;0.2125255245410559	0.7745650373481027;0.7745650373481027	0.965;0.035	0.748;0.252	FALSE	FALSE	FALSE	1	2	1	chr10	+	128240291-128240380;128240291-128240292	128240138-128240291;128240292-128240379;128240380-128240494	(128240292, 128240379)
Timeless	ENSMUST00000105243	ENSMUST00000105243:128240138-128240291:source	-0.21305677902676315;0.2130567790267647	0.7753260360570521;0.7753260360570521	0.965;0.035	0.748;0.252	FALSE	FALSE	FALSE	1	2	1	chr10	+	128240291-128240380;128240291-128240292	128240138-128240291;128240292-128240379;128240380-128240494	(128240292, 128240379)
Timeless	ENSMUST00000105244	ENSMUST00000105244:128240138-128240291:source	-0.215883735079695;0.21588373507969652	0.7894804252028076;0.7894804252028076	0.965;0.035	0.745;0.255	FALSE	FALSE	FALSE	1	2	1	chr10	+	128240291-128240380;128240291-128240292	128240138-128240291;128240292-128240379;128240380-128240494	(128240292, 128240379)
Timeless	ENSMUST00000105245	ENSMUST00000105245:128240138-128240291:source	-0.21807826080071988;0.2180782608007214	0.8070304100637739;0.8070304100637739	0.966;0.034	0.745;0.255	FALSE	FALSE	FALSE	1	2	1	chr10	+	128240291-128240380;128240291-128240292	128240138-128240291;128240292-128240379;128240380-128240494	(128240292, 128240379)
Timeless	ENSMUST00000125289	ENSMUST00000125289:128240138-128240291:source	-0.21508704626555147;0.21508704626555303	0.7846983554056781;0.7846983554056781	0.965;0.035	0.746;0.254	FALSE	FALSE	FALSE	1	2	1	chr10	+	128240291-128240380;128240291-128240292	128240138-128240291;128240292-128240379;128240380-128240494	(128240292, 128240379)
Timeless	ENSMUST00000145710	ENSMUST00000145710:128239834-128240291:source	-0.2178548773332583;0.21785487733325992	0.8048952961841574;0.8048952961841574	0.965;0.035	0.744;0.256	FALSE	FALSE	FALSE	1	2	1	chr10	+	128240291-128240380;128240291-128240292	128239834-128240291;128240292-128240379;128240380-128240494	(128240292, 128240379)
Tmem131l	ENSMUST00000052342	ENSMUST00000052342:84006187-84006197:source	0.9675911963252184;-0.9675911963252167	0.999999999999998;0.999999999999998	0.025;0.975	0.968;0.032	FALSE	FALSE	FALSE	1	2	1	chr3	-	84006197-84006223;84006197-84006198	84006187-84006197;84006198-84006222;84006223-84006233	(84006198, 84006222)
Tmem154	ENSMUST00000107682	ENSMUST00000107682:84689452-84689603:target	0.3276237195905714;-0.16020053976897136;-0.10089377482677263	0.9985137981982288;0.4016013054725845;0.025573405693537582	0.025;0.850;0.146	0.346;0.652;0.025	FALSE	TRUE	TRUE	2	3	1	chr3	+	84689416-84689452;84684590-84689576;84689451-84689452	84684552-84684590;84689406-84689416;84689417-84689451;84689452-84689603	(84689417, 84689451)
Togaram1	ENSMUST00000066296	ENSMUST00000066296:64976695-64976851:target	-0.2421188559086134;0.24211885590861495	0.8446263073422166;0.8446263073422166	0.971;0.029	0.723;0.277	FALSE	FALSE	TRUE	2	3	1	chr12	+	64968028-64976695;64970255-64976695	64965742-64968028;64970226-64970255;64976695-64976851
Togaram1	ENSMUST00000066296	ENSMUST00000066296:64965742-64968028:source	0.2844277132559243;-0.2844277132559228	0.9324087678926567;0.9324087678926567	0.044;0.956	0.329;0.671	FALSE	FALSE	TRUE	2	3	1	chr12	+	64968028-64970226;64968028-64976695	64965742-64968028;64970226-64970255;64976695-64976851
Tsc2	ENSMUST00000097373	ENSMUST00000097373:24596855-24596953:source	-0.307669734362079;0.3076697343620805	0.9658738257227384;0.9658738257227384	0.967;0.033	0.662;0.338	FALSE	FALSE	FALSE	1	2	1	chr17	-	24596953-24597046;24596953-24596954	24596855-24596953;24596954-24597045;24597046-24597137	(24596954, 24597045)
Tut7	ENSMUST00000071703	ENSMUST00000071703:59805223-59805375:target	-0.2494922079106253;0.2494922079106268	0.8616312847272114;0.8616312847272114	0.543;0.457	0.290;0.710	FALSE	FALSE	TRUE	2	3	1	chr13	-	59803111-59805223;59802196-59805223	59802016-59802196;59802992-59803111;59805223-59805375
Txnrd1	ENSMUST00000020484	ENSMUST00000020484:82874613-82874735:target	-0.2155174050752712;0.21551740507527273	0.6611591875072128;0.6611591875072128	0.376;0.624	0.135;0.865	FALSE	FALSE	TRUE	2	3	1	chr10	+	82859300-82874613;82860630-82874613	82859206-82859300;82860524-82860630;82874613-82874735
Ubxn7	ENSMUST00000115151	ENSMUST00000115151:32381262-32381655:target	-0.2742623899764306;0.27426238997643215	0.979570588184375;0.979570588184375	0.921;0.079	0.651;0.349	FALSE	FALSE	TRUE	2	3	1	chr16	+	32376024-32381262;32379832-32381262	32375897-32376024;32379761-32379832;32381262-32381655
Uckl1	ENSMUST00000057816	ENSMUST00000057816:181569909-181570031:target	0.3800723411596985;-0.38007234115969707	0.9928286809990896;0.9928286809990896	0.371;0.629	0.743;0.257	FALSE	FALSE	FALSE	1	2	1	chr2	-	181569803-181569909;181569908-181569909	181569696-181569803;181569804-181569908;181569909-181570031	(181569804, 181569908)
Uckl1	ENSMUST00000129469	ENSMUST00000129469:181569909-181570031:target	0.37949959831635144;-0.37949959831634994	0.9925919341576552;0.9925919341576552	0.372;0.628	0.744;0.256	FALSE	FALSE	FALSE	1	2	1	chr2	-	181569803-181569909;181569908-181569909	181569696-181569803;181569804-181569908;181569909-181570031	(181569804, 181569908)
Uckl1	ENSMUST00000134340	ENSMUST00000134340:181569909-181570031:target	0.3777985019972815;-0.37779850199727993	0.992459348943378;0.992459348943378	0.376;0.624	0.746;0.254	FALSE	FALSE	FALSE	1	2	1	chr2	-	181569803-181569909;181569908-181569909	181569711-181569803;181569804-181569908;181569909-181570031	(181569804, 181569908)
Uckl1	ENSMUST00000138408	ENSMUST00000138408:181569909-181570031:target	0.3790906658389154;-0.379090665838914	0.9925297269253774;0.9925297269253774	0.375;0.625	0.746;0.254	FALSE	FALSE	FALSE	1	2	1	chr2	-	181569803-181569909;181569908-181569909	181569696-181569803;181569804-181569908;181569909-181570031	(181569804, 181569908)
Uckl1	ENSMUST00000154613	ENSMUST00000154613:181569909-181570031:target	0.4175636760769428;-0.4175636760769414	0.9984701740401626;0.9984701740401626	0.338;0.662	0.746;0.254	FALSE	FALSE	FALSE	1	2	1	chr2	-	181569803-181569909;181569908-181569909	181569696-181569803;181569804-181569908;181569909-181570031	(181569804, 181569908)
Ulk1	ENSMUST00000031490	ENSMUST00000031490:110796156-110796229:source	-0.28015077486507983;0.2801507748650815	0.8667420724906951;0.8667420724906951	0.662;0.338	0.372;0.628	FALSE	FALSE	FALSE	1	2	1	chr5	-	110796229-110796327;110796229-110796230	110796156-110796229;110796230-110796326;110796327-110796500	(110796230, 110796326)
Ulk1	ENSMUST00000200299	ENSMUST00000200299:110796156-110796229:source	-0.27664928532081506;0.27664928532081656	0.8524310292489359;0.8524310292489359	0.663;0.337	0.375;0.625	FALSE	FALSE	FALSE	1	2	1	chr5	-	110796229-110796327;110796229-110796230	110796156-110796229;110796230-110796326;110796327-110796500	(110796230, 110796326)
Upf3b	ENSMUST00000076265	ENSMUST00000076265:37091678-37092661:source	-0.218948505650612;0.21894850565061355	0.7097217088525777;0.7097217088525777	0.906;0.094	0.670;0.330	FALSE	TRUE	TRUE	2	3	1	chrX	-	37092661-37095522;37091808-37092553	37091678-37092661;37095522-37095822
Utrn	ENSMUST00000076817	ENSMUST00000076817:12765271-12765332:source	0.3187012864304082;-0.3187012864304065	0.9810170677436464;0.9810170677436464	0.519;0.481	0.833;0.167	FALSE	FALSE	TRUE	2	3	1	chr10	-	12765332-12861568;12765332-12813446	12765271-12765332;12813446-12813456;12861568-12861735
Vps13b	ENSMUST00000048646	ENSMUST00000048646:35417511-35417631:source	0.3940964836381263;-0.39409648363812494	0.9999468212389995;0.9999468212389995	0.043;0.957	0.428;0.572	FALSE	FALSE	TRUE	2	3	1	chr15	+	35417631-35419285;35417631-35422308	35417511-35417631;35419285-35419326;35422308-35422475
Wdr33	ENSMUST00000025264	ENSMUST00000025264:31896601-31897036:target	-0.2188999769227894;0.21889997692279092	0.7182322703523418;0.7182322703523418	0.951;0.049	0.718;0.282	FALSE	FALSE	TRUE	2	3	1	chr18	+	31893098-31896601;31894392-31896601	31892990-31893098;31894382-31894392;31896601-31897036
Wdyhv1	ENSMUST00000067563	ENSMUST00000067563:58157902-58158652:target	0.2724844808755053;-0.2724844808755038	0.9107932487551095;0.9107932487551095	0.038;0.962	0.313;0.687	FALSE	FALSE	TRUE	2	3	1	chr15	+	58150656-58157902;58153704-58157902	58150606-58150656;58153580-58153704;58157902-58158652
Ythdc1	ENSMUST00000038384	ENSMUST00000038384:86831948-86832010:target	-0.20277528616596135;0.2027752861659629	0.6121339061047175;0.6121339061047175	0.762;0.238	0.532;0.468	FALSE	FALSE	FALSE	1	2	1	chr5	+	86831836-86831948;86831947-86831948	86831773-86831836;86831837-86831947;86831948-86832010	(86831837, 86831947)
Ythdc1	ENSMUST00000119339	ENSMUST00000119339:86831948-86832010:target	-0.20378387369321863;0.20378387369322018	0.6147071462110705;0.6147071462110705	0.762;0.238	0.531;0.469	FALSE	FALSE	FALSE	1	2	1	chr5	+	86831836-86831948;86831947-86831948	86831797-86831836;86831837-86831947;86831948-86832010	(86831837, 86831947)
Ythdc1	ENSMUST00000120498	ENSMUST00000120498:86831948-86832010:target	-0.20615088173373464;0.2061508817337362	0.6293335419551336;0.6293335419551336	0.764;0.236	0.531;0.469	FALSE	FALSE	FALSE	1	2	1	chr5	+	86831836-86831948;86831947-86831948	86831797-86831836;86831837-86831947;86831948-86832010	(86831837, 86831947)
Ythdc1	ENSMUST00000123625	ENSMUST00000123625:86831948-86832010:target	-0.26642658452100376;0.26642658452100526	0.817954828646247;0.817954828646247	0.712;0.288	0.430;0.570	FALSE	FALSE	FALSE	1	2	1	chr5	+	86831836-86831948;86831947-86831948	86831763-86831836;86831837-86831947;86831948-86832010	(86831837, 86831947)
Ythdc1	ENSMUST00000124123	ENSMUST00000124123:86831948-86832010:target	-0.2022839123815902;0.20228391238159174	0.6114773560828888;0.6114773560828888	0.762;0.238	0.532;0.468	FALSE	FALSE	FALSE	1	2	1	chr5	+	86831836-86831948;86831947-86831948	86831773-86831836;86831837-86831947;86831948-86832010	(86831837, 86831947)
Ythdc1	ENSMUST00000151489	ENSMUST00000151489:86831948-86832010:target	-0.20407849409503165;0.20407849409503323	0.6173150850010202;0.6173150850010202	0.764;0.236	0.532;0.468	FALSE	FALSE	FALSE	1	2	1	chr5	+	86831836-86831948;86831947-86831948	86831773-86831836;86831837-86831947;86831948-86832010	(86831837, 86831947)
Ythdc1	ENSMUST00000156363	ENSMUST00000156363:86831948-86832010:target	-0.2075337989318502;0.20753379893185167	0.6337879642741758;0.6337879642741758	0.762;0.238	0.528;0.472	FALSE	FALSE	FALSE	1	2	1	chr5	+	86831836-86831948;86831947-86831948	86831797-86831836;86831837-86831947;86831948-86832010	(86831837, 86831947)
Zfp280d	ENSMUST00000184019	ENSMUST00000184019:72331127-72331173:source	-0.21294915467491607;0.21294915467491762	0.6265615001994933;0.6265615001994933	0.693;0.307	0.445;0.555	FALSE	FALSE	FALSE	1	2	1	chr9	+	72331173-72331293;72331173-72331174	72331127-72331173;72331174-72331292;72331293-72331433	(72331174, 72331292)
Zfp280d	ENSMUST00000184019	ENSMUST00000184019:72331293-72331433:target	-0.2620004511916979;0.2620004511916994	0.7964094098289383;0.7964094098289383	0.801;0.199	0.520;0.480	FALSE	FALSE	FALSE	1	2	1	chr9	+	72331173-72331293;72331292-72331293	72331127-72331173;72331174-72331292;72331293-72331433	(72331174, 72331292)
Zfp335	ENSMUST00000041361	ENSMUST00000041361:164892878-164892952:target	-0.29985905931962703;0.2998590593196285	0.9523623582827215;0.9523623582827215	0.658;0.342	0.360;0.640	FALSE	FALSE	FALSE	1	2	1	chr2	-	164892770-164892878;164892877-164892878	164892687-164892770;164892771-164892877;164892878-164892952	(164892771, 164892877)
Zfp335	ENSMUST00000183830	ENSMUST00000183830:164892878-164892952:target	-0.2985225946722828;0.2985225946722842	0.950448664869657;0.950448664869657	0.658;0.342	0.361;0.639	FALSE	FALSE	FALSE	1	2	1	chr2	-	164892770-164892878;164892877-164892878	164892687-164892770;164892771-164892877;164892878-164892952	(164892771, 164892877)
Zfp687	ENSMUST00000019482	ENSMUST00000019482:95008072-95008213:target	-0.21534551041725672;0.21534551041725822	0.708151849816277;0.708151849816277	0.914;0.086	0.684;0.316	FALSE	FALSE	FALSE	1	2	1	chr3	-	95007966-95008072;95008071-95008072	95006702-95007966;95007967-95008071;95008072-95008213	(95007967, 95008071)
Zfp687	ENSMUST00000137799	ENSMUST00000137799:95008072-95008213:target	-0.21549703010373064;0.2154970301037322	0.7065458041789232;0.7065458041789232	0.914;0.086	0.684;0.316	FALSE	FALSE	FALSE	1	2	1	chr3	-	95007966-95008072;95008071-95008072	95006837-95007966;95007967-95008071;95008072-95008213	(95007967, 95008071)
Zfp687	ENSMUST00000147022	ENSMUST00000147022:95008072-95008213:target	-0.2195798376278639;0.2195798376278654	0.7255960246989569;0.7255960246989569	0.914;0.086	0.681;0.319	FALSE	FALSE	FALSE	1	2	1	chr3	-	95007966-95008072;95008071-95008072	95006832-95007966;95007967-95008071;95008072-95008213	(95007967, 95008071)

## Sheet: Legend.
Supplemental_Dataset_S2: Data output generated by the MAJIQ analyses
MAJIQ generates a probability score P which estimates whether the difference of splice junction usage (delta Y) between experimental conditions is greater than or equal to 20% [P (delta Y) ³ 0.2)].
The data are separated into individual worksheets accoring to type of deaminase knockout (Adar, Adarb1) and tissue type (Cortex, Liver).
Columns description:
Gene Name				gene name
Transcript ID				Ensembl Transcript ID
LSV ID				local splicing variations
E(dPSI) per LSV junction				quantification of the change in LSV inclusion level per LSV junction
P(|E(dPSI)|>=0.20) per LSV junction				change >= 0.2
Cortex Adar WT E(PSI)				percent inclusion in wildtype mice
Cortex Adar KO E(PSI)				percent inclusion in Adar ko mice
A5SS				alternative 5' splice site --> True or False
A3SS				alternative 3' splice site --> True or False
ES				ES (editing site) overlapping with the splicing event --> True or False
Num. Junctions				number of junctions involved in the LSV
Num. Exons				number of exons involved in the LSV
De Novo Junctions?				number of newly detected junctions
Chr				chromosome
Strand				strand (+ or -)
Junctions Coordinates				coordinates of exon-exon junctions
Exons Coordinates				coordinates of indivdual exons involved in the LSV
IR Coordinates				coordinates of an IR (intron retention) event

## Sheet: Cortex-Adar KO-MasterTable
Gene Name	Transcript ID	LSV ID	E(dPSI) per LSV junction	P(|E(dPSI)|>=0.20) per LSV junction	Cortex Adar WT E(PSI)	Cortex Adar KO E(PSI)	A5SS	A3SS	ES	Num. Junctions	Num. Exons	De Novo Junctions?	Chr	Strand	Junctions Coordinates	Exons Coordinates	IR Coordinates
9430021M05Rik	ENSMUST00000140771	ENSMUST00000140771:124942583-124942759:target	-0.318743823267;0.318743823267	0.975874465417;0.975874465417	0.745;0.255	0.434;0.566	FALSE	FALSE	FALSE	1	2	1	chr4	+	124942471-124942583;124942582-124942583	124942353-124942471;124942472-124942582;124942583-124942759	(124942472, 124942582)
9430021M05Rik	ENSMUST00000145985	ENSMUST00000145985:162661163-162661426:source	0.239492023638;-0.116482444597;-0.0363841595898	0.915355360714;0.2820050414;0.00928429158198	0.025;0.831;0.164	0.259;0.660;0.081	FALSE	FALSE	TRUE	3	4	1	chr2	+	162661426-162661721;162661426-162665809;162661426-162666389	162661163-162661426;162661721-162661796;162665809-162666024;162666389-162667109
9930104L06Rik	ENSMUST00000094769	ENSMUST00000094769:124942583-124944656:target	-0.312600732533;0.312600732533	0.96808328391;0.96808328391	0.744;0.256	0.438;0.562	FALSE	FALSE	FALSE	1	2	1	chr4	+	124942471-124942583;124942582-124942583	124942353-124942471;124942472-124942582;124942583-124944656	(124942472, 124942582)
Adora1	ENSMUST00000086465	ENSMUST00000086465:134235228-134235431:target	-0.417872548887;0.417872548887	0.999256292876;0.999256292876	0.710;0.290	0.303;0.697	FALSE	FALSE	FALSE	1	2	1	chr1	-	134234412-134235228;134235227-134235228	134234015-134234412;134234413-134235227;134235228-134235431	(134234413, 134235227)
Adora1	ENSMUST00000187631	ENSMUST00000187631:134235228-134235364:target	-0.262499187705;0.262499187705	0.857679781033;0.857679781033	0.699;0.301	0.434;0.566	FALSE	FALSE	FALSE	1	2	1	chr1	-	134234446-134235228;134235227-134235228	134234015-134234446;134234447-134235227;134235228-134235364	(134234447, 134235227)
Aebp2	ENSMUST00000160836	ENSMUST00000160836:140650756-140650782:source	0.223185081688;-0.223185081688	0.737171953335;0.737171953335	0.153;0.847	0.382;0.618	FALSE	FALSE	FALSE	1	2	1	chr6	+	140650782-140651316;140650782-140650783	140650756-140650782;140650783-140651315;140651316-140651744	(140650783, 140651315)
Aebp2	ENSMUST00000162100	ENSMUST00000162100:140650756-140650782:source	0.219886275189;-0.219886275189	0.732059934724;0.732059934724	0.156;0.844	0.381;0.619	FALSE	FALSE	FALSE	1	2	1	chr6	+	140650782-140651316;140650782-140650783	140650756-140650782;140650783-140651315;140651316-140652030	(140650783, 140651315)
Aebp2	ENSMUST00000161335	ENSMUST00000161335:140650756-140650782:source	0.211838622046;-0.211838622046	0.69221270991;0.69221270991	0.154;0.846	0.374;0.626	FALSE	FALSE	FALSE	1	2	1	chr6	+	140650782-140651316;140650782-140650783	140650756-140650782;140650783-140651315;140651316-140652826	(140650783, 140651315)
Anks3	ENSMUST00000023157	ENSMUST00000023157:4964120-4964237:target	-0.263375190034;0.263375190034	0.861432417652;0.861432417652	0.665;0.335	0.400;0.600	FALSE	FALSE	TRUE	2	3	1	chr16	-	4960568-4964120;4957762-4964120	4957641-4957762;4960397-4960568;4964120-4964237
Arrdc1	ENSMUST00000028349	ENSMUST00000028349:24926272-24926448:target	-0.245162519433;0.245162519433	0.906231765157;0.906231765157	0.840;0.160	0.600;0.400	FALSE	FALSE	FALSE	1	2	1	chr2	-	24926194-24926272;24926271-24926272	24925756-24926194;24926195-24926271;24926272-24926448	(24926195, 24926271)
Arrdc1	ENSMUST00000102935	ENSMUST00000102935:24926272-24926445:target	-0.241831418357;0.241831418357	0.883634845848;0.883634845848	0.841;0.159	0.604;0.396	FALSE	FALSE	FALSE	1	2	1	chr2	-	24926194-24926272;24926271-24926272	24925756-24926194;24926195-24926271;24926272-24926445	(24926195, 24926271)
Asun	ENSMUST00000032427	ENSMUST00000032427:146550087-146550164:target	-0.299250310621;0.299250310621	0.957359545453;0.957359545453	0.755;0.245	0.462;0.538	FALSE	FALSE	FALSE	1	2	1	chr6	-	146549985-146550087;146550086-146550087	146549632-146549985;146549986-146550086;146550087-146550164	(146549986, 146550086)
Asun	ENSMUST00000152994	ENSMUST00000152994:146549931-146549985:source	-0.248124624615;0.248124624615	0.892677125748;0.892677125748	0.403;0.597	0.159;0.841	FALSE	FALSE	FALSE	1	2	1	chr6	-	146549985-146550087;146549985-146549986	146549931-146549985;146549986-146550086;146550087-146550401	(146549986, 146550086)
Asun	ENSMUST00000032427	ENSMUST00000032427:146549632-146549985:source	-0.205325676674;0.205325676674	0.690640837984;0.690640837984	0.494;0.506	0.284;0.716	FALSE	FALSE	FALSE	1	2	1	chr6	-	146549985-146550087;146549985-146549986	146549632-146549985;146549986-146550086;146550087-146550164	(146549986, 146550086)
Au022252	ENSMUST00000046260	ENSMUST00000046260:119232583-119232678:target	-0.208977440069;0.208977440069	0.721254983365;0.721254983365	0.596;0.404	0.386;0.614	FALSE	FALSE	FALSE	1	2	1	chr4	-	119232469-119232583;119232582-119232583	119232354-119232469;119232470-119232582;119232583-119232678	(119232470, 119232582)
Aurka	ENSMUST00000109140	ENSMUST00000109140:172356190-172356981:source	0.236939591301;-0.236939591301	0.78305513531;0.78305513531	0.519;0.481	0.764;0.236	FALSE	FALSE	FALSE	1	2	1	chr2	-	172356981-172357081;172356981-172356982	172356190-172356981;172356982-172357080;172357081-172357255	(172356982, 172357080)
Aurka	ENSMUST00000109139	ENSMUST00000109139:172356196-172356981:source	0.232917799959;-0.232917799959	0.771645695059;0.771645695059	0.522;0.478	0.763;0.237	FALSE	FALSE	FALSE	1	2	1	chr2	-	172356981-172357081;172356981-172356982	172356196-172356981;172356982-172357080;172357081-172357255	(172356982, 172357080)
Aurka	ENSMUST00000028997	ENSMUST00000028997:172356196-172356981:source	0.230923300013;-0.230923300013	0.758495947052;0.758495947052	0.523;0.477	0.764;0.236	FALSE	FALSE	FALSE	1	2	1	chr2	-	172356981-172357081;172356981-172356982	172356196-172356981;172356982-172357080;172357081-172357255	(172356982, 172357080)
B3galti	ENSMUST00000188614	ENSMUST00000188614:67565871-67566034:source	0.206170081781;-0.206170081781	0.675218201307;0.675218201307	0.099;0.901	0.321;0.679	FALSE	FALSE	TRUE	2	3	1	chr2	+	67566034-67654307;67566034-67748160	67565871-67566034;67654307-67654317;67748160-67748263
Bag6	ENSMUST00000173550	ENSMUST00000173550:35142307-35142384:source	0.254732587184;-0.254732587184	0.89366294797;0.89366294797	0.638;0.362	0.888;0.112	FALSE	FALSE	FALSE	1	2	1	chr17	+	35142384-35142498;35142384-35142385	35142307-35142384;35142385-35142497;35142498-35142605	(35142385, 35142497)
Bag6	ENSMUST00000173535	ENSMUST00000173535:35142307-35142384:source	0.253284716759;-0.253284716759	0.890326439088;0.890326439088	0.641;0.359	0.890;0.110	FALSE	FALSE	FALSE	1	2	1	chr17	+	35142384-35142498;35142384-35142385	35142307-35142384;35142385-35142497;35142498-35142595	(35142385, 35142497)
Bag6	ENSMUST00000174281	ENSMUST00000174281:35142307-35142384:source	0.251142305701;-0.251142305701	0.882720482634;0.882720482634	0.641;0.359	0.888;0.112	FALSE	FALSE	FALSE	1	2	1	chr17	+	35142384-35142498;35142384-35142385	35142307-35142384;35142385-35142497;35142498-35142605	(35142385, 35142497)
Car15	ENSMUST00000118960	ENSMUST00000118960:17835636-17835802:source	-0.208638007389;0.208638007389	0.708972325549;0.708972325549	0.893;0.107	0.682;0.318	FALSE	FALSE	FALSE	1	2	1	chr16	-	17835802-17835892;17835802-17835803	17835636-17835802;17835803-17835891;17835892-17835958	(17835803, 17835891)
Ccdc65	ENSMUST00000003444	ENSMUST00000003444:98709055-98709222:source	-0.208404894726;0.244674500499;-0.0176408133583	0.734456873889;0.892264916396;1.85262120411e-08	0.292;0.652;0.056	0.084;0.892;0.027	FALSE	FALSE	TRUE	3	4	1	chr15	+	98709222-98710779;98709222-98717424;98709222-98718712	98709055-98709222;98710779-98710789;98717424-98717593;98718712-98718850
Ccdc84	ENSMUST00000053286	ENSMUST00000053286:44413443-44413533:target	-0.318669235944;0.318669235944	0.981116319353;0.981116319353	0.479;0.521	0.168;0.832	TRUE	TRUE	FALSE	2	2	1	chr9	-	44413201-44413471;44413201-44413443	44413137-44413201;44413137-44413201;44413443-44413533
Cep126	ENSMUST00000037397	ENSMUST00000037397:8079495-8079559:target	0.308811763609;-0.308811763609	0.961392720635;0.961392720635	0.121;0.879	0.424;0.576	FALSE	FALSE	TRUE	2	3	1	chr9	-	8078358-8079495;8076946-8079495	8076633-8076946;8078348-8078358;8079495-8079559
Chrd	ENSMUST00000153299	ENSMUST00000153299:20734862-20734962:target	0.316149943027;-0.316149943027	0.942076718039;0.942076718039	0.106;0.894	0.418;0.582	FALSE	FALSE	FALSE	1	2	1	chr16	+	20734773-20734862;20734861-20734862	20734686-20734773;20734774-20734861;20734862-20734962	(20734774, 20734861)
Chrd	ENSMUST00000007171	ENSMUST00000007171:20738904-20738997:source	0.239023723253;-0.239023723253	0.830855030121;0.830855030121	0.653;0.347	0.892;0.108	FALSE	FALSE	FALSE	1	2	1	chr16	+	20738997-20739111;20738997-20738998	20738904-20738997;20738998-20739110;20739111-20739164	(20738998, 20739110)
Chrd	ENSMUST00000153299	ENSMUST00000153299:20738904-20738997:source	0.237286091737;-0.237286091737	0.82422065787;0.82422065787	0.654;0.346	0.891;0.109	FALSE	FALSE	FALSE	1	2	1	chr16	+	20738997-20739111;20738997-20738998	20738904-20738997;20738998-20739110;20739111-20739164	(20738998, 20739110)
Clcn2	ENSMUST00000131522	ENSMUST00000131522:20712654-20712787:target	-0.23060103813;0.23060103813	0.848425139976;0.848425139976	0.725;0.275	0.498;0.502	FALSE	FALSE	FALSE	1	2	1	chr16	-	20712549-20712654;20712653-20712654	20712472-20712549;20712550-20712653;20712654-20712787	(20712550, 20712653)
Clcn2	ENSMUST00000007207	ENSMUST00000007207:20712654-20712787:target	-0.227832497195;0.227832497195	0.830992639065;0.830992639065	0.720;0.280	0.496;0.504	FALSE	FALSE	FALSE	1	2	1	chr16	-	20712549-20712654;20712653-20712654	20712472-20712549;20712550-20712653;20712654-20712787	(20712550, 20712653)
Clcn2	ENSMUST00000120099	ENSMUST00000120099:20712654-20712787:target	-0.225130615919;0.225130615919	0.823676661218;0.823676661218	0.720;0.280	0.498;0.502	FALSE	FALSE	FALSE	1	2	1	chr16	-	20712549-20712654;20712653-20712654	20712472-20712549;20712550-20712653;20712654-20712787	(20712550, 20712653)
Clcn2	ENSMUST00000153075	ENSMUST00000153075:20712654-20712787:target	-0.221429879389;0.221429879389	0.795690120103;0.795690120103	0.716;0.284	0.497;0.503	FALSE	FALSE	FALSE	1	2	1	chr16	-	20712549-20712654;20712653-20712654	20712472-20712549;20712550-20712653;20712654-20712787	(20712550, 20712653)
Cog1	ENSMUST00000137878	ENSMUST00000137878:113661140-113661218:source	0.257817219933;-0.257817219933	0.830753980573;0.830753980573	0.236;0.764	0.500;0.500	FALSE	FALSE	FALSE	1	2	1	chr11	+	113661218-113661659;113661218-113661219	113661140-113661218;113661219-113661658;113661659-113661693	(113661219, 113661658)
Cyp4x1	ENSMUST00000106545	ENSMUST00000106545:115106323-115108856:source	-0.44624467757;0.0680127931028;-0.0226643469342;0.261088258621;-0.00156862449283;0.0807745559498	0.999999988432;0.00335839671774;1.77735626505e-08;0.994278937429;1.91124019053e-13;0.00306555712452	0.803;0.061;0.067;0.025;0.029;0.036	0.368;0.154;0.034;0.280;0.025;0.140	TRUE	TRUE	TRUE	6	3	1	chr4	-	115108856-115110029;115108314-115108344;115108256-115108286;115108227-115108286;115108198-115108286;115108198-115108228	115106323-115108856;115110029-115110111
Cytb	ENSMUST00000082421	ENSMUST00000082421:14145-15288:source	-0.00402315466429;0.187629209085;0.00251029484803;0.000133387722642;0.0185340497874;-0.1532531634;-0.00844298095583	2.88144095897e-17;0.59811027504;2.61801258662e-15;9.10905938389e-18;4.10582661564e-05;0.378073677532;8.08028447236e-17	0.034;0.176;0.028;0.025;0.204;0.497;0.042	0.025;0.366;0.035;0.025;0.244;0.328;0.025	TRUE	TRUE	FALSE	7	2	1	chrM	+	14288-14330;14427-14539;14716-15017;14763-14899;15038-15087;15137-15169;15151-15180	14145-15288
Dgat1	ENSMUST00000162813	ENSMUST00000162813:76503706-76503780:target	-0.561949104309;0.561949104309	0.999999279609;0.999999279609	0.849;0.151	0.301;0.699	FALSE	FALSE	FALSE	1	2	1	chr15	-	76503621-76503706;76503705-76503706	76503591-76503621;76503622-76503705;76503706-76503780	(76503622, 76503705)
Dgat1	ENSMUST00000162813	ENSMUST00000162813:76503591-76503621:source	-0.269715989347;0.269715989347	0.886027813559;0.886027813559	0.520;0.480	0.251;0.749	FALSE	FALSE	FALSE	1	2	1	chr15	-	76503621-76503706;76503621-76503622	76503591-76503621;76503622-76503705;76503706-76503780	(76503622, 76503705)
Dnm1	ENSMUST00000202578	ENSMUST00000202578:32309479-32309634:source	0.241065415399;-0.241065415399	0.965465420309;0.965465420309	0.126;0.874	0.361;0.639	FALSE	FALSE	FALSE	1	2	1	chr2	-	32309634-32310451;32309634-32309635	32309479-32309634;32309635-32310450;32310451-32310487	(32309635, 32310450)
Dnm1	ENSMUST00000202578	ENSMUST00000202578:32310451-32310487:target	0.229149936934;-0.229149936934	0.8692454961;0.8692454961	0.201;0.799	0.425;0.575	FALSE	FALSE	FALSE	1	2	1	chr2	-	32309634-32310451;32310450-32310451	32309479-32309634;32309635-32310450;32310451-32310487	(32309635, 32310450)
Dock4	ENSMUST00000037488	ENSMUST00000037488:40794597-40794623:target	-0.255935157293;0.255935157293	0.931000434518;0.931000434518	0.971;0.029	0.720;0.280	FALSE	FALSE	TRUE	2	3	1	chr12	+	40790161-40794597;40794338-40794597	40790076-40790161;40794328-40794338;40794597-40794623
Dpp7	ENSMUST00000139971	ENSMUST00000139971:25356029-25356142:source	-0.258322072353;0.258322072353	0.948183436517;0.948183436517	0.728;0.272	0.476;0.524	FALSE	FALSE	FALSE	1	2	1	chr2	-	25356142-25356231;25356142-25356143	25356029-25356142;25356143-25356230;25356231-25356331	(25356143, 25356230)
Dpp7	ENSMUST00000125248	ENSMUST00000125248:25355703-25356142:source	-0.255566346179;0.255566346179	0.937744131535;0.937744131535	0.727;0.273	0.477;0.523	FALSE	FALSE	FALSE	1	2	1	chr2	-	25356142-25356231;25356142-25356143	25355703-25356142;25356143-25356230;25356231-25356332	(25356143, 25356230)
Dpp7	ENSMUST00000150305	ENSMUST00000150305:25356029-25356142:source	-0.254184798223;0.254184798223	0.931043025866;0.931043025866	0.727;0.273	0.478;0.522	FALSE	FALSE	FALSE	1	2	1	chr2	-	25356142-25356231;25356142-25356143	25356029-25356142;25356143-25356230;25356231-25356346	(25356143, 25356230)
Dpp7	ENSMUST00000139108	ENSMUST00000139108:25355814-25356142:source	-0.254295414613;0.254295414613	0.927115428248;0.927115428248	0.726;0.274	0.478;0.522	FALSE	FALSE	FALSE	1	2	1	chr2	-	25356142-25356231;25356142-25356143	25355814-25356142;25356143-25356230;25356231-25356345	(25356143, 25356230)
Dpp7	ENSMUST00000028332	ENSMUST00000028332:25356029-25356142:source	-0.253995177736;0.253995177736	0.927000485252;0.927000485252	0.725;0.275	0.476;0.524	FALSE	FALSE	FALSE	1	2	1	chr2	-	25356142-25356231;25356142-25356143	25356029-25356142;25356143-25356230;25356231-25356359	(25356143, 25356230)
Dpp7	ENSMUST00000133253	ENSMUST00000133253:25353360-25353516:source	-0.237491632248;0.237491632248	0.903474773772;0.903474773772	0.680;0.320	0.448;0.552	FALSE	FALSE	FALSE	1	2	1	chr2	-	25353516-25353608;25353516-25353517	25353360-25353516;25353517-25353607;25353608-25353726	(25353517, 25353607)
Dpp7	ENSMUST00000144218	ENSMUST00000144218:25353360-25353516:source	-0.23189267442;0.23189267442	0.882184695073;0.882184695073	0.673;0.327	0.447;0.553	FALSE	FALSE	FALSE	1	2	1	chr2	-	25353516-25353608;25353516-25353517	25353360-25353516;25353517-25353607;25353608-25353726	(25353517, 25353607)
Dpp7	ENSMUST00000028332	ENSMUST00000028332:25353360-25353516:source	-0.23347810111;0.23347810111	0.855238728699;0.855238728699	0.675;0.325	0.446;0.554	FALSE	FALSE	FALSE	1	2	1	chr2	-	25353516-25353608;25353516-25353517	25353360-25353516;25353517-25353607;25353608-25353726	(25353517, 25353607)
Ehmt2	ENSMUST00000137071	ENSMUST00000137071:34911579-34911665:target	0.239669189807;-0.239669189807	0.885987015212;0.885987015212	0.321;0.679	0.556;0.444	FALSE	FALSE	FALSE	1	2	1	chr17	+	34911055-34911579;34911578-34911579	34910978-34911055;34911056-34911578;34911579-34911665	(34911056, 34911578)
Eif5a	ENSMUST00000071026	ENSMUST00000071026:69919151-69919336:source	0.216732866837;-0.216732866837	0.721327711605;0.721327711605	0.205;0.795	0.432;0.568	FALSE	FALSE	FALSE	1	2	1	chr11	-	69919336-69919449;69919336-69919337	69919151-69919336;69919337-69919448;69919449-69919478	(69919337, 69919448)
Eif5a	ENSMUST00000070996	ENSMUST00000070996:69919151-69919336:source	0.210293254462;-0.210293254462	0.693339579673;0.693339579673	0.206;0.794	0.428;0.572	FALSE	FALSE	FALSE	1	2	1	chr11	-	69919336-69919449;69919336-69919337	69919151-69919336;69919337-69919448;69919449-69919478	(69919337, 69919448)
Elac2	ENSMUST00000071891	ENSMUST00000071891:65001832-65002069:target	-0.310781059863;0.310781059863	0.977972719508;0.977972719508	0.506;0.494	0.202;0.798	FALSE	FALSE	FALSE	1	2	1	chr11	+	65001213-65001832;65001831-65001832	65000995-65001213;65001214-65001831;65001832-65002069	(65001214, 65001831)
Exoc3l	ENSMUST00000057855	ENSMUST00000057855:105290232-105290356:source	0.249395640832;-0.249395640832	0.840238402764;0.840238402764	0.601;0.399	0.852;0.148	FALSE	FALSE	FALSE	1	2	1	chr8	-	105290356-105290449;105290356-105290357	105290232-105290356;105290357-105290448;105290449-105290604	(105290357, 105290448)
Fam163b	ENSMUST00000151224	ENSMUST00000151224:27110380-27112890:source	0.0664129910319;-0.126079768297;-0.164421704605;0.166729244944;0.0184042526919;-3.41467215152e-10;0.00515476659773	0.037312596043;0.0187637863961;0.253090900547;0.357476332805;1.52029457674e-17;9.06456627738e-18;1.07838380323e-17	0.581;0.150;0.186;0.073;0.025;0.025;0.025	0.661;0.025;0.025;0.237;0.051;0.025;0.035	TRUE	TRUE	TRUE	7	3	1	chr2	-	27112890-27113548;27111744-27111796;27111714-27111764;27111697-27111745;27111611-27111745;27111611-27111698;27111611-27111647	27110380-27112890;27113548-27113663
Fam193b	ENSMUST00000021957	ENSMUST00000021957:55549118-55549357:source	-0.29889799223;0.29889799223		0.846;0.154	0.555;0.445	FALSE	FALSE	TRUE	2	3	1	chr13	-	55549357-55550224;55549357-55549962	55549118-55549357;55549962-55550007;55550224-55550407
Fam196a	ENSMUST00000171394	ENSMUST00000171394:134881926-134884591:source	0.380500301659;-0.380500301659	0.991939016862;0.991939016862	0.049;0.951	0.421;0.579	FALSE	FALSE	TRUE	2	3	1	chr7	-	134884591-134917643;134884591-134899146	134881926-134884591;134899146-134899217;134917643-134918804
Fancg	ENSMUST00000030165	ENSMUST00000030165:43006750-43006896:source	-0.253842236388;0.253842236388	0.890382981747;0.890382981747	0.818;0.182	0.567;0.433	FALSE	FALSE	FALSE	1	2	1	chr4	-	43006896-43006984;43006896-43006897	43006750-43006896;43006897-43006983;43006984-43007114	(43006897, 43006983)
Fancg	ENSMUST00000123332	ENSMUST00000123332:43006750-43006896:source	-0.249529315348;0.249529315348	0.877186473191;0.877186473191	0.818;0.182	0.571;0.429	FALSE	FALSE	FALSE	1	2	1	chr4	-	43006896-43006984;43006896-43006897	43006750-43006896;43006897-43006983;43006984-43007403	(43006897, 43006983)
Fanci	ENSMUST00000132091	ENSMUST00000132091:79448820-79449180:source	0.223391687265;-0.223391687265	0.75551581448;0.75551581448	0.107;0.893	0.335;0.665	FALSE	FALSE	FALSE	1	2	1	chr7	+	79449180-79449640;79449180-79449181	79448820-79449180;79449181-79449639;79449640-79450264	(79449181, 79449639)
Fanci	ENSMUST00000036865	ENSMUST00000036865:79449073-79449180:source	0.220731137221;-0.220731137221	0.743785338269;0.743785338269	0.106;0.894	0.333;0.667	FALSE	FALSE	FALSE	1	2	1	chr7	+	79449180-79449640;79449180-79449181	79449073-79449180;79449181-79449639;79449640-79450264	(79449181, 79449639)
Fgd2	ENSMUST00000123989	ENSMUST00000123989:29373218-29373297:source	-0.220915520757;0.220915520757	0.742328308442;0.742328308442	0.651;0.349	0.426;0.574	FALSE	FALSE	FALSE	1	2	1	chr17	+	29373297-29373384;29373297-29373298	29373218-29373297;29373298-29373383;29373384-29373414	(29373298, 29373383)
Fgd2	ENSMUST00000137644	ENSMUST00000137644:29373218-29373297:source	-0.21614433975;0.21614433975	0.730622852291;0.730622852291	0.650;0.350	0.429;0.571	FALSE	FALSE	FALSE	1	2	1	chr17	+	29373297-29373384;29373297-29373298	29373218-29373297;29373298-29373383;29373384-29373414	(29373298, 29373383)
Fgd2	ENSMUST00000024810	ENSMUST00000024810:29373218-29373297:source	-0.211432047051;0.211432047051	0.69970745956;0.69970745956	0.649;0.351	0.431;0.569	FALSE	FALSE	FALSE	1	2	1	chr17	+	29373297-29373384;29373297-29373298	29373218-29373297;29373298-29373383;29373384-29373414	(29373298, 29373383)
Fkbp8	ENSMUST00000119425	ENSMUST00000119425:70529391-70529583:target	0.308682301974;-0.308682301974	0.934327407044;0.934327407044	0.542;0.458	0.849;0.151	FALSE	FALSE	FALSE	1	2	1	chr8	+	70529266-70529391;70529390-70529391	70528816-70529266;70529267-70529390;70529391-70529583	(70529267, 70529390)
Fmn2	ENSMUST00000030039	ENSMUST00000030039:174608382-174609952:target	-0.268701098666;0.0525675549175;0.155923222727	0.951270549183;1.23833247893e-05;0.404430634773	0.906;0.025;0.091	0.643;0.092;0.264	TRUE	TRUE	TRUE	3	3	1	chr1	+	174593116-174608382;174609237-174609304;174609270-174609304	174593061-174593116;174608382-174609952
Foxp4	ENSMUST00000097311	ENSMUST00000097311:47875840-47875923:target	-0.224186050217;0.224186050217	0.793264239826;0.793264239826	0.965;0.035	0.740;0.260	FALSE	FALSE	FALSE	1	2	1	chr17	-	47875724-47875840;47875839-47875840	47875520-47875724;47875725-47875839;47875840-47875923	(47875725, 47875839)
Foxp4	ENSMUST00000113263	ENSMUST00000113263:47875840-47875923:target	-0.218858105408;0.218858105408	0.764321194575;0.764321194575	0.966;0.034	0.744;0.256	FALSE	FALSE	FALSE	1	2	1	chr17	-	47875724-47875840;47875839-47875840	47875520-47875724;47875725-47875839;47875840-47875923	(47875725, 47875839)
Gabpa	ENSMUST00000009120	ENSMUST00000009120:84860375-84863779:target	-0.22032126011;0.22032126011	0.755592796392;0.755592796392	0.534;0.466	0.311;0.689	FALSE	TRUE	TRUE	2	3	1	chr16	+	84857572-84860375;84863009-84863061	84857380-84857572;84860375-84863779
Galns	ENSMUST00000015171	ENSMUST00000015171:122584912-122585033:source	0.317354437283;-0.317354437283	0.958232584161;0.958232584161	0.265;0.735	0.577;0.423	FALSE	FALSE	TRUE	2	3	1	chr8	-	122585033-122595766;122585033-122591438	122584912-122585033;122591438-122591540;122595766-122595869
Ggps1	ENSMUST00000170957	ENSMUST00000170957:14059319-14059457:target	0.214819506851;-0.214819506851	0.743587399761;0.743587399761	0.365;0.635	0.581;0.419	FALSE	FALSE	TRUE	2	3	1	chr13	-	14059211-14059319;14057888-14059319	14057796-14057888;14058924-14059211;14059319-14059457
Glb1l	ENSMUST00000113623	ENSMUST00000113623:75201198-75201287:source	-0.25481737494;0.25481737494	0.975362200572;0.975362200572	0.974;0.026	0.725;0.275	FALSE	FALSE	FALSE	1	2	1	chr1	-	75201287-75201399;75201287-75201288	75201198-75201287;75201288-75201398;75201399-75201473	(75201288, 75201398)
Glb1l	ENSMUST00000146713	ENSMUST00000146713:75201198-75201287:source	-0.255967787267;0.255967787267	0.974625192514;0.974625192514	0.974;0.026	0.724;0.276	FALSE	FALSE	FALSE	1	2	1	chr1	-	75201287-75201399;75201287-75201288	75201198-75201287;75201288-75201398;75201399-75201473	(75201288, 75201398)
Glb1l	ENSMUST00000132507	ENSMUST00000132507:75201198-75201287:source	-0.254805615024;0.254805615024	0.970378812075;0.970378812075	0.974;0.026	0.725;0.275	FALSE	FALSE	FALSE	1	2	1	chr1	-	75201287-75201399;75201287-75201288	75201198-75201287;75201288-75201398;75201399-75201473	(75201288, 75201398)
Glb1l	ENSMUST00000189663	ENSMUST00000189663:75201198-75201287:source	-0.255659437057;0.255659437057	0.969708318255;0.969708318255	0.974;0.026	0.724;0.276	FALSE	FALSE	FALSE	1	2	1	chr1	-	75201287-75201399;75201287-75201288	75201198-75201287;75201288-75201398;75201399-75201473	(75201288, 75201398)
Glbl1	ENSMUST00000186173	ENSMUST00000186173:75201198-75201287:source	-0.254223015178;0.254223015178	0.971752719089;0.971752719089	0.974;0.026	0.726;0.274	FALSE	FALSE	FALSE	1	2	1	chr1	-	75201287-75201399;75201287-75201288	75201198-75201287;75201288-75201398;75201399-75201473	(75201288, 75201398)
Glbl1	ENSMUST00000155716	ENSMUST00000155716:75201198-75201287:source	-0.25401467746;0.25401467746	0.969836493361;0.969836493361	0.974;0.026	0.726;0.274	FALSE	FALSE	FALSE	1	2	1	chr1	-	75201287-75201399;75201287-75201288	75201198-75201287;75201288-75201398;75201399-75201473	(75201288, 75201398)
Gm15440	ENSMUST00000110042	ENSMUST00000110042:51691289-51691498:source	-0.26825417464;0.26825417464	0.974984098772;0.974984098772	0.752;0.248	0.491;0.509	FALSE	FALSE	TRUE	2	3	1	chr13	-	51691498-51700837;51691498-51695419	51691289-51691498;51695419-51695450;51700837-51701041
Gm15440	ENSMUST00000110042	ENSMUST00000110042:51700837-51701041:target	0.182760474111;0.078667682864;-0.285823912637	0.563816363425;0.00122428199923;0.992218062515	0.178;0.034;0.780	0.362;0.137;0.501	FALSE	TRUE	TRUE	3	3	1	chr13	-	51695450-51700837;51695447-51700837;51691498-51700837	51691289-51691498;51695419-51695450;51695419-51695450;51700837-51701041
Gm20518	ENSMUST00000150068	ENSMUST00000150068:17835636-17835802:source	-0.20552990604;0.20552990604	0.693391407156;0.693391407156	0.891;0.109	0.683;0.317	FALSE	FALSE	FALSE	1	2	1	chr16	-	17835802-17835892;17835802-17835803	17835636-17835802;17835803-17835891;17835892-17836635	(17835803, 17835891)
Gm20605	ENSMUST00000177545	ENSMUST00000177545:137642096-137642234:target	0.216848951803;-0.216848951803	0.788848620871;0.788848620871	0.746;0.254	0.959;0.041	FALSE	FALSE	FALSE	1	2	1	chr5	+	137642013-137642096;137642095-137642096	137641910-137642013;137642014-137642095;137642096-137642234	(137642014, 137642095)
Gm26804	ENSMUST00000181248	ENSMUST00000181248:20395309-20395319:source	-0.203803658341;0.203803658341	0.655930871502;0.655930871502	0.231;0.769	0.026;0.974	FALSE	FALSE	FALSE	1	2	1	chr8	+	20395319-20395356;20395319-20395320	20395309-20395319;20395320-20395349;20395350-20395547	(20395320, 20395349)
Gm4285	ENSMUST00000131222	ENSMUST00000131222:75844774-75844964:target	-0.285045850169;0.285045850169	0.916207621245;0.916207621245	0.796;0.204	0.514;0.486	FALSE	FALSE	FALSE	1	2	1	chr14	-	75844657-75844774;75844773-75844774	75844551-75844657;75844658-75844773;75844774-75844964	(75844658, 75844773)
Gpr137	ENSMUST00000099774	ENSMUST00000099774:6939261-6939410:source	-0.287754836337;0.287754836337	0.91885212677;0.91885212677	0.486;0.514	0.201;0.799	FALSE	FALSE	FALSE	1	2	1	chr19	-	6939410-6940352;6939410-6939411	6939261-6939410;6939411-6940351;6940352-6940482	(6939411, 6940351)
Haghl	ENSMUST00000133071	ENSMUST00000133071:25785423-25785582:target	-0.204018184538;0.204018184538	0.694353050941;0.694353050941	0.649;0.351	0.444;0.556	FALSE	FALSE	FALSE	1	2	1	chr17	-	25784725-25785423;25785422-25785423	25784661-25784725;25784726-25785422;25785423-25785582	(25784726, 25785422)
Hdac10	ENSMUST00000128908	ENSMUST00000128908:89128390-89128661:target	0.269902715574;-0.269902715574	0.970812468374;0.970812468374	0.711;0.289	0.974;0.026	FALSE	FALSE	FALSE	1	2	1	chr15	-	89128319-89128390;89128389-89128390	89128185-89128319;89128320-89128389;89128390-89128661	(89128320, 89128389)
Hdac10	ENSMUST00000143465	ENSMUST00000143465:89128390-89128651:target	0.268462390492;-0.268462390492	0.96823911217;0.96823911217	0.713;0.287	0.974;0.026	FALSE	FALSE	FALSE	1	2	1	chr15	-	89128319-89128390;89128389-89128390	89128185-89128319;89128320-89128389;89128390-89128651	(89128320, 89128389)
Hdac10	ENSMUST00000082197	ENSMUST00000082197:89128390-89128700:target	0.26902407783;-0.26902407783	0.967789927109;0.967789927109	0.712;0.288	0.974;0.026	FALSE	FALSE	FALSE	1	2	1	chr15	-	89128319-89128390;89128389-89128390	89128185-89128319;89128320-89128389;89128390-89128700	(89128320, 89128389)
Hdac10	ENSMUST00000134111	ENSMUST00000134111:89128390-89128679:target	0.267756839588;-0.267756839588	0.965539834426;0.965539834426	0.713;0.287	0.974;0.026	FALSE	FALSE	FALSE	1	2	1	chr15	-	89128319-89128390;89128389-89128390	89128185-89128319;89128320-89128389;89128390-89128679	(89128320, 89128389)
Hdac10	ENSMUST00000129398	ENSMUST00000129398:89128390-89128653:target	0.26597265935;-0.26597265935	0.963830521106;0.963830521106	0.715;0.285	0.974;0.026	FALSE	FALSE	FALSE	1	2	1	chr15	-	89128319-89128390;89128389-89128390	89128185-89128319;89128320-89128389;89128390-89128653	(89128320, 89128389)
Hdac10	ENSMUST00000109347	ENSMUST00000109347:89128390-89128448:target	0.265773053081;-0.265773053081	0.963735826818;0.963735826818	0.715;0.285	0.974;0.026	FALSE	FALSE	FALSE	1	2	1	chr15	-	89128319-89128390;89128389-89128390	89128185-89128319;89128320-89128389;89128390-89128448	(89128320, 89128389)
Hdac5	ENSMUST00000140962	ENSMUST00000140962:102195952-102196117:target	0.261376714271;-0.261376714271	0.865226351414;0.865226351414	0.312;0.688	0.574;0.426	FALSE	FALSE	FALSE	1	2	1	chr11	-	102195894-102195952;102195951-102195952	102195749-102195894;102195895-102195951;102195952-102196117	(102195895, 102195951)
Hdac5	ENSMUST00000145540	ENSMUST00000145540:102195952-102196322:target	0.255919355656;-0.255919355656	0.848863654631;0.848863654631	0.315;0.685	0.574;0.426	FALSE	FALSE	FALSE	1	2	1	chr11	-	102195894-102195952;102195951-102195952	102195749-102195894;102195895-102195951;102195952-102196322	(102195895, 102195951)
Hsf1	ENSMUST00000072838	ENSMUST00000072838:76498422-76498691:source	0.22838624959;-0.22838624959	0.839313103814;0.839313103814	0.260;0.740	0.484;0.516	FALSE	FALSE	TRUE	2	3	1	chr15	+	76498691-76499132;76498691-76499948	76498422-76498691;76499132-76499215;76499948-76500053
Hsf1	ENSMUST00000072838	ENSMUST00000072838:76499948-76500053:target	-0.22607914555;0.22607914555	0.831844805744;0.831844805744	0.850;0.150	0.627;0.373	FALSE	FALSE	TRUE	2	3	1	chr15	+	76498691-76499948;76499215-76499948	76498422-76498691;76499132-76499215;76499948-76500053
Htra2	ENSMUST00000113962	ENSMUST00000113962:83053038-83053070:source	0.294153953627;-0.294153953627	0.980951423004;0.980951423004	0.032;0.968	0.320;0.680	FALSE	FALSE	FALSE	1	2	1	chr6	-	83053070-83053613;83053070-83053071	83053038-83053070;83053071-83053612;83053613-83053817	(83053071, 83053612)
Inha	ENSMUST00000037330	ENSMUST00000037330:75509334-75510366:target	0.202187496387;2.11007602257e-06;-0.224315732202	0.704204650591;9.06526995078e-18;0.853288815008	0.417;0.025;0.577	0.616;0.025;0.358	FALSE	FALSE	TRUE	2	3	1	chr1	+	75507518-75509334;75508469-75509334;75509333-75509334	75507077-75507518;75508459-75508469;75508470-75509333;75509334-75510366	(75508470, 75509333)
Ip6k2	ENSMUST00000085018	ENSMUST00000085018:108798110-108798178:source	0.323386297601;-0.323386297601	0.982445189381;0.982445189381	0.373;0.627	0.689;0.311	FALSE	FALSE	FALSE	1	2	1	chr9	+	108798178-108798271;108798178-108798179	108798110-108798178;108798179-108798270;108798271-108798493	(108798179, 108798270)
Irak1	ENSMUST00000145677	ENSMUST00000145677:74022618-74022952:source	-0.343054731691;0.343054731691	0.999321851704;0.999321851704	0.923;0.077	0.588;0.412	FALSE	FALSE	FALSE	1	2	1	chrX	-	74022952-74023066;74022952-74022953	74022618-74022952;74022953-74023065;74023066-74023197	(74022953, 74023065)
Irak1	ENSMUST00000101458	ENSMUST00000101458:74022849-74022952:source	-0.33846999485;0.33846999485	0.999212725094;0.999212725094	0.927;0.073	0.597;0.403	FALSE	FALSE	FALSE	1	2	1	chrX	-	74022952-74023066;74022952-74022953	74022849-74022952;74022953-74023065;74023066-74023197	(74022953, 74023065)
Irak1	ENSMUST00000114360	ENSMUST00000114360:74022849-74022952:source	-0.33798195322;0.33798195322	0.999165359696;0.999165359696	0.926;0.074	0.596;0.404	FALSE	FALSE	FALSE	1	2	1	chrX	-	74022952-74023066;74022952-74022953	74022849-74022952;74022953-74023065;74023066-74023197	(74022953, 74023065)
Irak1	ENSMUST00000033769	ENSMUST00000033769:74022849-74022952:source	-0.337025226562;0.337025226562	0.999144096527;0.999144096527	0.926;0.074	0.597;0.403	FALSE	FALSE	FALSE	1	2	1	chrX	-	74022952-74023066;74022952-74022953	74022849-74022952;74022953-74023065;74023066-74023197	(74022953, 74023065)
Irak1	ENSMUST00000068286	ENSMUST00000068286:74022849-74022952:source	-0.334761366957;0.334761366957	0.999095690984;0.999095690984	0.925;0.075	0.599;0.401	FALSE	FALSE	FALSE	1	2	1	chrX	-	74022952-74023066;74022952-74022953	74022849-74022952;74022953-74023065;74023066-74023197	(74022953, 74023065)
Irak1	ENSMUST00000114353	ENSMUST00000114353:74022849-74022952:source	-0.335208821103;0.335208821103	0.999072644743;0.999072644743	0.925;0.075	0.599;0.401	FALSE	FALSE	FALSE	1	2	1	chrX	-	74022952-74023066;74022952-74022953	74022849-74022952;74022953-74023065;74023066-74023197	(74022953, 74023065)
Irak1	ENSMUST00000148706	ENSMUST00000148706:74022849-74022952:source	-0.334563905475;0.334563905475	0.999067470251;0.999067470251	0.926;0.074	0.600;0.400	FALSE	FALSE	FALSE	1	2	1	chrX	-	74022952-74023066;74022952-74022953	74022849-74022952;74022953-74023065;74023066-74023197	(74022953, 74023065)
Irak1	ENSMUST00000132144	ENSMUST00000132144:74022849-74022952:source	-0.335224824765;0.335224824765	0.998990161553;0.998990161553	0.925;0.075	0.598;0.402	FALSE	FALSE	FALSE	1	2	1	chrX	-	74022952-74023066;74022952-74022953	74022849-74022952;74022953-74023065;74023066-74023091	(74022953, 74023065)
Irak1	ENSMUST00000114354	ENSMUST00000114354:74022849-74022952:source	-0.335453519423;0.335453519423	0.998987617147;0.998987617147	0.926;0.074	0.599;0.401	FALSE	FALSE	FALSE	1	2	1	chrX	-	74022952-74023066;74022952-74022953	74022849-74022952;74022953-74023065;74023066-74023197	(74022953, 74023065)
Irak1	ENSMUST00000124580	ENSMUST00000124580:74022849-74022952:source	-0.334511669888;0.334511669888	0.998982964367;0.998982964367	0.925;0.075	0.598;0.402	FALSE	FALSE	FALSE	1	2	1	chrX	-	74022952-74023066;74022952-74022953	74022849-74022952;74022953-74023065;74023066-74023173	(74022953, 74023065)
Irak1	ENSMUST00000149871	ENSMUST00000149871:74022849-74022952:source	-0.334620532099;0.334620532099	0.9989415818;0.9989415818	0.927;0.073	0.600;0.400	FALSE	FALSE	FALSE	1	2	1	chrX	-	74022952-74023066;74022952-74022953	74022849-74022952;74022953-74023065;74023066-74023197	(74022953, 74023065)
Irak1	ENSMUST00000114352	ENSMUST00000114352:74022849-74022952:source	-0.330847226465;0.330847226465	0.99861146223;0.99861146223	0.926;0.074	0.603;0.397	FALSE	FALSE	FALSE	1	2	1	chrX	-	74022952-74023066;74022952-74022953	74022849-74022952;74022953-74023065;74023066-74023197	(74022953, 74023065)
Irf3	ENSMUST00000207476	ENSMUST00000207476:44999892-45000063:source	-0.208805895512;0.208805895512	0.787012771591;0.787012771591	0.913;0.087	0.709;0.291	FALSE	FALSE	FALSE	1	2	1	chr7	+	45000063-45000154;45000063-45000064	44999892-45000063;45000064-45000153;45000154-45000224	(45000064, 45000153)
Irf3	ENSMUST00000207521	ENSMUST00000207521:44999892-45000063:source	-0.202132136881;0.202132136881	0.744806854163;0.744806854163	0.913;0.087	0.715;0.285	FALSE	FALSE	FALSE	1	2	1	chr7	+	45000063-45000154;45000063-45000064	44999892-45000063;45000064-45000153;45000154-45000224	(45000064, 45000153)
Irf3	ENSMUST00000207555	ENSMUST00000207555:44999892-45000063:source	-0.201776323519;0.201776323519	0.744119352525;0.744119352525	0.912;0.088	0.714;0.286	FALSE	FALSE	FALSE	1	2	1	chr7	+	45000063-45000154;45000063-45000064	44999892-45000063;45000064-45000153;45000154-45000224	(45000064, 45000153)
Irf3	ENSMUST00000003284	ENSMUST00000003284:44999892-45000063:source	-0.20115558942;0.20115558942	0.743642884561;0.743642884561	0.914;0.086	0.716;0.284	FALSE	FALSE	FALSE	1	2	1	chr7	+	45000063-45000154;45000063-45000064	44999892-45000063;45000064-45000153;45000154-45000224	(45000064, 45000153)
Irf3	ENSMUST00000209066	ENSMUST00000209066:44999892-45000063:source	-0.201666271503;0.201666271503	0.739333727684;0.739333727684	0.913;0.087	0.715;0.285	FALSE	FALSE	FALSE	1	2	1	chr7	+	45000063-45000154;45000063-45000064	44999892-45000063;45000064-45000153;45000154-45000224	(45000064, 45000153)
Irf3	ENSMUST00000107834	ENSMUST00000107834:44999892-45000063:source	-0.200554081348;0.200554081348	0.730111429729;0.730111429729	0.912;0.088	0.715;0.285	FALSE	FALSE	FALSE	1	2	1	chr7	+	45000063-45000154;45000063-45000064	44999892-45000063;45000064-45000153;45000154-45000224	(45000064, 45000153)
Irf3	ENSMUST00000208143	ENSMUST00000208143:45000645-45001257:target	-0.201620013496;0.201620013496	0.680489424764;0.680489424764	0.508;0.492	0.306;0.694	FALSE	FALSE	FALSE	1	2	1	chr7	+	45000546-45000645;45000644-45000645	45000501-45000546;45000547-45000644;45000645-45001257	(45000547, 45000644)
Irgq	ENSMUST00000049020	ENSMUST00000049020:24533266-24538600:target	0.435626293872;-0.435626293872	1.0;1.0	0.550;0.450	0.975;0.025	FALSE	TRUE	TRUE	2	3	1	chr7	+	24531915-24533266;24536815-24536869	24531384-24531915;24533266-24538600
Itsn2	ENSMUST00000062580	ENSMUST00000062580:4673416-4673607:source	-0.22741411571;0.22741411571	0.767577347022;0.767577347022	0.659;0.341	0.425;0.575	FALSE	FALSE	TRUE	2	3	1	chr12	+	4673607-4676211;4673607-4697142	4673416-4673607;4676211-4676221;4697142-4697263
Kank3	ENSMUST00000172649	ENSMUST00000172649:33819092-33819179:target	-0.294656715157;0.294656715157	0.99056505024;0.99056505024	0.787;0.213	0.500;0.500	FALSE	FALSE	FALSE	1	2	1	chr17	+	33818997-33819092;33819091-33819092	33818800-33818997;33818998-33819091;33819092-33819179	(33818998, 33819091)
Kank3	ENSMUST00000048560	ENSMUST00000048560:33819092-33819179:target	-0.293581122121;0.293581122121	0.987231401032;0.987231401032	0.787;0.213	0.500;0.500	FALSE	FALSE	FALSE	1	2	1	chr17	+	33818997-33819092;33819091-33819092	33818800-33818997;33818998-33819091;33819092-33819179	(33818998, 33819091)
Kcnk4	ENSMUST00000025908	ENSMUST00000025908:6928282-6928408:source	-0.274152995647;0.274152995647	0.958204279878;0.958204279878	0.905;0.095	0.638;0.362	FALSE	FALSE	TRUE	2	3	1	chr19	-	6928408-6932703;6928408-6929113	6928282-6928408;6929113-6929191;6932703-6932968
Kif22	ENSMUST00000205754	ENSMUST00000205754:127027729-127027990:source	-0.245687583164;0.245687583164	0.886821309481;0.886821309481	0.901;0.099	0.660;0.340	FALSE	FALSE	FALSE	1	2	1	chr7	-	127027990-127028070;127027990-127027991	127027729-127027990;127027991-127028069;127028070-127028282	(127027991, 127028069)
Kif22	ENSMUST00000032915	ENSMUST00000032915:127027931-127027990:source	-0.243041707908;0.243041707908	0.885384302142;0.885384302142	0.902;0.098	0.664;0.336	FALSE	FALSE	FALSE	1	2	1	chr7	-	127027990-127028070;127027990-127027991	127027931-127027990;127027991-127028069;127028070-127028282	(127027991, 127028069)
Lrch1	ENSMUST00000088970	ENSMUST00000088970:74786281-74786390:source	-0.30515408572;-2.66920047755e-05;0.313343912943	0.988870369596;8.95009272647e-16;0.99235150996	0.425;0.025;0.565	0.127;0.025;0.871	FALSE	FALSE	TRUE	3	4	1	chr14	-	74786390-74795297;74786390-74794911;74786390-74793127	74786281-74786390;74793127-74793231;74794911-74794991;74795297-74795369
Lrrc57	ENSMUST00000102497	ENSMUST00000102497:120608918-120609023:source	0.263431748854;-0.263431748854	0.933511316765;0.933511316765	0.615;0.385	0.873;0.127	FALSE	FALSE	FALSE	1	2	1	chr2	-	120609023-120609115;120609023-120609024	120608918-120609023;120609024-120609114;120609115-120609355	(120609024, 120609114)
Lrrc57	ENSMUST00000141932	ENSMUST00000141932:120608818-120609023:source	0.264322934427;-0.264322934427	0.932244861795;0.932244861795	0.610;0.390	0.868;0.132	FALSE	FALSE	FALSE	1	2	1	chr2	-	120609023-120609115;120609023-120609024	120608818-120609023;120609024-120609114;120609115-120609302	(120609024, 120609114)
Map4k2	ENSMUST00000142496	ENSMUST00000142496:6343255-6343386:target	-0.238654771891;0.238654771891	0.879417702799;0.879417702799	0.911;0.089	0.676;0.324	FALSE	FALSE	FALSE	1	2	1	chr19	+	6343176-6343255;6343254-6343255	6343104-6343176;6343177-6343254;6343255-6343386	(6343177, 6343254)
Map4k2	ENSMUST00000152259	ENSMUST00000152259:6343255-6343386:target	-0.237988684835;0.237988684835	0.878032276478;0.878032276478	0.910;0.090	0.677;0.323	FALSE	FALSE	FALSE	1	2	1	chr19	+	6343176-6343255;6343254-6343255	6343104-6343176;6343177-6343254;6343255-6343386	(6343177, 6343254)
Map4k2	ENSMUST00000155569	ENSMUST00000155569:6343255-6343386:target	-0.238007591175;0.238007591175	0.877964760796;0.877964760796	0.908;0.092	0.675;0.325	FALSE	FALSE	FALSE	1	2	1	chr19	+	6343176-6343255;6343254-6343255	6343104-6343176;6343177-6343254;6343255-6343386	(6343177, 6343254)
Map4k2	ENSMUST00000133696	ENSMUST00000133696:6343255-6343386:target	-0.238139239108;0.238139239108	0.877443490928;0.877443490928	0.910;0.090	0.676;0.324	FALSE	FALSE	FALSE	1	2	1	chr19	+	6343176-6343255;6343254-6343255	6343104-6343176;6343177-6343254;6343255-6343386	(6343177, 6343254)
Map4k2	ENSMUST00000124333	ENSMUST00000124333:6343255-6343386:target	-0.23753626521;0.23753626521	0.87446070079;0.87446070079	0.909;0.091	0.675;0.325	FALSE	FALSE	FALSE	1	2	1	chr19	+	6343176-6343255;6343254-6343255	6343104-6343176;6343177-6343254;6343255-6343386	(6343177, 6343254)
Map4k2	ENSMUST00000025897	ENSMUST00000025897:6343255-6343386:target	-0.237242852144;0.237242852144	0.872555689781;0.872555689781	0.909;0.091	0.676;0.324	FALSE	FALSE	FALSE	1	2	1	chr19	+	6343176-6343255;6343254-6343255	6343104-6343176;6343177-6343254;6343255-6343386	(6343177, 6343254)
Map4k2	ENSMUST00000123468	ENSMUST00000123468:6343255-6343386:target	-0.236443843322;0.236443843322	0.870580925259;0.870580925259	0.909;0.091	0.676;0.324	FALSE	FALSE	FALSE	1	2	1	chr19	+	6343176-6343255;6343254-6343255	6343104-6343176;6343177-6343254;6343255-6343386	(6343177, 6343254)
Map4k2	ENSMUST00000124556	ENSMUST00000124556:6343255-6343386:target	-0.233422480295;0.233422480295	0.856424102221;0.856424102221	0.909;0.091	0.680;0.320	FALSE	FALSE	FALSE	1	2	1	chr19	+	6343176-6343255;6343254-6343255	6343104-6343176;6343177-6343254;6343255-6343386	(6343177, 6343254)
Mapk12	ENSMUST00000088827	ENSMUST00000088827:89133079-89133150:source	0.200045918344;-0.200045918344	0.653789235895;0.653789235895	0.114;0.886	0.326;0.674	FALSE	FALSE	TRUE	2	3	1	chr15	-	89133150-89137401;89133150-89134612	89133079-89133150;89134612-89134726;89137401-89137459
Meg3	ENSMUST00000124106	ENSMUST00000124106:109544027-109544742:source	-0.25357813025;0.25357813025	0.924537708422;0.924537708422	0.432;0.568	0.184;0.816	FALSE	FALSE	FALSE	1	2	1	chr12	+	109544742-109544948;109544742-109544743	109544027-109544742;109544743-109544947;109544948-109545041	(109544743, 109544947)
Meg3	ENSMUST00000143836	ENSMUST00000143836:109544027-109544742:source	-0.249378670975;0.249378670975	0.915744598512;0.915744598512	0.433;0.567	0.190;0.810	FALSE	FALSE	FALSE	1	2	1	chr12	+	109544742-109544948;109544742-109544743	109544027-109544742;109544743-109544947;109544948-109545041	(109544743, 109544947)
Meg3	ENSMUST00000124106	ENSMUST00000124106:109544948-109545041:target	-0.217994019616;0.217994019616	0.807232274538;0.807232274538	0.446;0.554	0.233;0.767	FALSE	FALSE	FALSE	1	2	1	chr12	+	109544742-109544948;109544947-109544948	109544027-109544742;109544743-109544947;109544948-109545041	(109544743, 109544947)
Meg3	ENSMUST00000143836	ENSMUST00000143836:109544948-109545041:target	-0.210514147541;0.210514147541	0.754881708853;0.754881708853	0.445;0.555	0.238;0.762	FALSE	FALSE	FALSE	1	2	1	chr12	+	109544742-109544948;109544947-109544948	109544027-109544742;109544743-109544947;109544948-109545041	(109544743, 109544947)
Mfsd10	ENSMUST00000155577	ENSMUST00000155577:34634932-34634962:source	-0.251641532712;0.251641532712	0.905319134435;0.905319134435	0.902;0.098	0.655;0.345	FALSE	FALSE	FALSE	1	2	1	chr5	-	34634962-34635051;34634962-34634963	34634932-34634962;34634963-34635050;34635051-34635159	(34634963, 34635050)
Mib2	ENSMUST00000141112	ENSMUST00000141112:119232583-119232712:target	-0.210346343042;0.210346343042	0.721034901672;0.721034901672	0.597;0.403	0.385;0.615	FALSE	FALSE	FALSE	1	2	1	chr4	-	119232469-119232583;119232582-119232583	119232354-119232469;119232470-119232582;119232583-119232712	(119232470, 119232582)
Mib2	ENSMUST00000141108	ENSMUST00000141108:155658894-155659001:source	0.201695538742;-0.201695538742	0.655503535881;0.655503535881	0.321;0.679	0.539;0.461	FALSE	FALSE	FALSE	1	2	1	chr4	-	155659001-155659123;155659001-155659002	155658894-155659001;155659002-155659122;155659123-155659265	(155659002, 155659122)
Mms19	ENSMUST00000169779	ENSMUST00000169779:41944549-41944580:source	0.222128709545;-0.222128709545	0.763594990657;0.763594990657	0.733;0.267	0.954;0.046	FALSE	FALSE	FALSE	1	2	1	chr19	-	41944580-41944657;41944580-41944581	41944549-41944580;41944581-41944656;41944657-41944757	(41944581, 41944656)
Morc2a	ENSMUST00000093389	ENSMUST00000093389:3683545-3683616:source	-0.213319507077;0.213319507077	0.773955107092;0.773955107092	0.913;0.087	0.702;0.298	FALSE	FALSE	FALSE	1	2	1	chr11	+	3683616-3683699;3683616-3683617	3683545-3683616;3683617-3683698;3683699-3684076	(3683617, 3683698)
Morc2a	ENSMUST00000096441	ENSMUST00000096441:3683545-3683616:source	-0.208998565963;0.208998565963	0.741875455215;0.741875455215	0.913;0.087	0.705;0.295	FALSE	FALSE	FALSE	1	2	1	chr11	+	3683616-3683699;3683616-3683617	3683545-3683616;3683617-3683698;3683699-3684076	(3683617, 3683698)
Mrpl2	ENSMUST00000113429	ENSMUST00000113429:46648670-46648769:target	-0.278950655579;0.278950655579	0.918299815144;0.918299815144	0.553;0.447	0.278;0.722	FALSE	FALSE	FALSE	1	2	1	chr17	+	46648587-46648670;46648669-46648670	46648472-46648587;46648588-46648669;46648670-46648769	(46648588, 46648669)
Mxra8	ENSMUST00000141766	ENSMUST00000141766:155842905-155842981:target	-0.241158935119;0.241158935119	0.941472307765;0.941472307765	0.973;0.027	0.738;0.262	FALSE	FALSE	FALSE	1	2	1	chr4	+	155842832-155842905;155842904-155842905	155842793-155842832;155842833-155842904;155842905-155842981	(155842833, 155842904)
Mxra8	ENSMUST00000126487	ENSMUST00000126487:155842905-155842981:target	-0.240781545027;0.240781545027	0.939459435181;0.939459435181	0.973;0.027	0.738;0.262	FALSE	FALSE	FALSE	1	2	1	chr4	+	155842832-155842905;155842904-155842905	155842793-155842832;155842833-155842904;155842905-155842981	(155842833, 155842904)
Mxra8	ENSMUST00000030947	ENSMUST00000030947:155842905-155842981:target	-0.239006890988;0.239006890988	0.934913845541;0.934913845541	0.973;0.027	0.740;0.260	FALSE	FALSE	FALSE	1	2	1	chr4	+	155842832-155842905;155842904-155842905	155842793-155842832;155842833-155842904;155842905-155842981	(155842833, 155842904)
Naa40	ENSMUST00000025675	ENSMUST00000025675:7229722-7229805:source	0.258529507294;-0.258529507294	0.961790952488;0.961790952488	0.085;0.915	0.337;0.663	FALSE	FALSE	TRUE	2	3	1	chr19	-	7229805-7230188;7229805-7229948	7229722-7229805;7229948-7230106;7230188-7230283
Naa40	ENSMUST00000025675	ENSMUST00000025675:7230188-7230283:target	-0.186489498484;0.227693426514;-0.0132843580514	0.588483302627;0.897512981913;0.000131734972035	0.555;0.046;0.397	0.365;0.268;0.367	FALSE	FALSE	TRUE	2	3	1	chr19	-	7230106-7230188;7229805-7230188;7230187-7230188	7229722-7229805;7229948-7230106;7230107-7230187;7230188-7230283	(7230107, 7230187)
Nap1l1	ENSMUST00000065917	ENSMUST00000065917:111496040-111496105:source	0.208528617515;-0.208528617515	0.632703558714;0.632703558714	0.369;0.631	0.575;0.425	FALSE	FALSE	FALSE	1	2	1	chr10	+	111496105-111496754;111496105-111496106	111496040-111496105;111496106-111496753;111496754-111496886	(111496106, 111496753)
Nav3	ENSMUST00000032719	ENSMUST00000032719:109824573-109824681:source	-0.356349984484;0.356349984484	0.987412932899;0.987412932899	0.819;0.181	0.470;0.530	FALSE	FALSE	TRUE	2	3	1	chr10	-	109824681-109841703;109824681-109831893	109824573-109824681;109831893-109831903;109841703-109841818
Nbea	ENSMUST00000029374	ENSMUST00000029374:55955339-55955493:target	0.219825297987;-0.219825297987	0.785398875297;0.785398875297	0.138;0.862	0.357;0.643	TRUE	TRUE	FALSE	2	2	1	chr3	-	55953162-55955357;55953162-55955339	55953036-55953162;55953036-55953162;55955339-55955493
Ndst2	ENSMUST00000047490	ENSMUST00000047490:20727178-20727360:source	-0.33022739216;0.33022739216	0.987490360657;0.987490360657	0.901;0.099	0.579;0.421	FALSE	FALSE	FALSE	1	2	1	chr14	-	20727360-20727487;20727360-20727361	20727178-20727360;20727361-20727486;20727487-20727615	(20727361, 20727486)
Nle1	ENSMUST00000170815	ENSMUST00000170815:82904240-82904636:target	-0.271754668767;0.271754668767	0.880978317525;0.880978317525	0.826;0.174	0.553;0.447	FALSE	FALSE	FALSE	1	2	1	chr11	-	82904136-82904240;82904239-82904240	82904106-82904136;82904137-82904239;82904240-82904636	(82904137, 82904239)
Npas4	ENSMUST00000056129	ENSMUST00000056129:4987315-4987450:source	0.555590338199;-0.555590338199	0.999999997453;0.999999997453	0.059;0.941	0.601;0.399	FALSE	FALSE	TRUE	2	3	1	chr19	-	4987450-4988075;4987450-4987778	4987315-4987450;4987778-4987887;4988075-4988348
Npas4	ENSMUST00000056129	ENSMUST00000056129:4988075-4988348:target	-0.328352792744;0.328352792744	0.995391072677;0.995391072677	0.939;0.061	0.619;0.381	FALSE	FALSE	TRUE	2	3	1	chr19	-	4987887-4988075;4987450-4988075	4987315-4987450;4987778-4987887;4988075-4988348
Nrbp2	ENSMUST00000019516	ENSMUST00000019516:76090246-76090542:target	0.00113712448365;-0.380511916844;0.353907583672	5.94889853023e-11;0.996255357355;0.989295100081	0.025;0.669;0.327	0.028;0.298;0.672	TRUE	FALSE	TRUE	2	3	1	chr15	-	76089783-76090474;76090146-76090246;76090245-76090246	76089748-76089831;76090052-76090146;76090147-76090245;76090246-76090542	(76090147, 76090245)
Ntsr2	ENSMUST00000111064	ENSMUST00000111064:16657382-16657392:source	-0.372659348556;0.372659348556	0.999662044534;0.999662044534	0.389;0.611	0.026;0.974	FALSE	FALSE	FALSE	1	2	1	chr12	+	16657392-16657449;16657392-16657393	16657382-16657392;16657393-16657448;16657449-16657459	(16657393, 16657448)
Oaz1	ENSMUST00000179341	ENSMUST00000179341:80828711-80828796:source	-0.297590449935;0.297590449935	0.987184375205;0.987184375205	0.688;0.312	0.398;0.602	FALSE	FALSE	FALSE	1	2	1	chr10	+	80828796-80828893;80828796-80828797	80828711-80828796;80828797-80828892;80828893-80829285	(80828797, 80828892)
Phf7	ENSMUST00000022459	ENSMUST00000022459:31238337-31238482:source	-0.25574015478;0.25574015478	0.865428651284;0.865428651284	0.682;0.318	0.427;0.573	FALSE	FALSE	TRUE	2	3	1	chr14	-	31238482-31239631;31238482-31239120	31238337-31238482;31239120-31239236;31239631-31239737
Plcb3	ENSMUST00000025912	ENSMUST00000025912:6965509-6965584:source	-0.260135971664;0.260135971664	0.892282434723;0.892282434723	0.925;0.075	0.667;0.333	FALSE	FALSE	FALSE	1	2	1	chr19	-	6965584-6965686;6965584-6965585	6965509-6965584;6965585-6965685;6965686-6965739	(6965585, 6965685)
Polrmt	ENSMUST00000020580	ENSMUST00000020580:79737457-79737509:source	-0.208337905276;0.208337905276	0.760347972967;0.760347972967	0.827;0.173	0.621;0.379	FALSE	FALSE	FALSE	1	2	1	chr10	-	79737509-79737600;79737509-79737510	79737457-79737509;79737510-79737599;79737600-79737713	(79737510, 79737599)
Polrmt	ENSMUST00000159016	ENSMUST00000159016:79737457-79737509:source	-0.204192263911;0.204192263911	0.736924810962;0.736924810962	0.827;0.173	0.625;0.375	FALSE	FALSE	FALSE	1	2	1	chr10	-	79737509-79737600;79737509-79737510	79737457-79737509;79737510-79737599;79737600-79737713	(79737510, 79737599)
Polrmt	ENSMUST00000160838	ENSMUST00000160838:79737264-79737509:source	-0.204815299985;0.204815299985	0.732233705794;0.732233705794	0.825;0.175	0.623;0.377	FALSE	FALSE	FALSE	1	2	1	chr10	-	79737509-79737600;79737509-79737510	79737264-79737509;79737510-79737599;79737600-79737686	(79737510, 79737599)
Polrmt	ENSMUST00000162694	ENSMUST00000162694:79737457-79737509:source	-0.204064116661;0.204064116661	0.729610603554;0.729610603554	0.824;0.176	0.623;0.377	FALSE	FALSE	FALSE	1	2	1	chr10	-	79737509-79737600;79737509-79737510	79737457-79737509;79737510-79737599;79737600-79737886	(79737510, 79737599)
Polrmt	ENSMUST00000161662	ENSMUST00000161662:79737457-79737509:source	-0.204266985286;0.204266985286	0.72574153547;0.72574153547	0.826;0.174	0.624;0.376	FALSE	FALSE	FALSE	1	2	1	chr10	-	79737509-79737600;79737509-79737510	79737457-79737509;79737510-79737599;79737600-79737713	(79737510, 79737599)
Polrmt	ENSMUST00000161098	ENSMUST00000161098:79737457-79737509:source	-0.201403895217;0.201403895217	0.71054360235;0.71054360235	0.824;0.176	0.625;0.375	FALSE	FALSE	FALSE	1	2	1	chr10	-	79737509-79737600;79737509-79737510	79737457-79737509;79737510-79737599;79737600-79737713	(79737510, 79737599)
Ppcdc	ENSMUST00000085709	ENSMUST00000085709:57437417-57437482:source	-0.277986608294;0.277986608294	0.849415682499;0.849415682499	0.408;0.592	0.123;0.877	FALSE	FALSE	TRUE	2	3	1	chr9	-	57437482-57440070;57437482-57437998	57437417-57437482;57437998-57438150;57440070-57440114
Ppm1a	ENSMUST00000021514	ENSMUST00000021514:72792954-72793137:target	0.280428795027;-0.280428795027	0.967105594191;0.967105594191	0.069;0.931	0.343;0.657	FALSE	FALSE	FALSE	1	2	1	chr12	+	72792835-72792954;72792953-72792954	72792778-72792835;72792836-72792953;72792954-72793137	(72792836, 72792953)
Ppp1cc	ENSMUST00000151184	ENSMUST00000151184:122174055-122174115:source	-0.20289431076;0.20289431076	0.613537174452;0.613537174452	0.592;0.408	0.390;0.610	FALSE	FALSE	FALSE	1	2	1	chr5	+	122174115-122174980;122174115-122174116	122174055-122174115;122174116-122174979;122174980-122175265	(122174116, 122174979)
Ppp1cc	ENSMUST00000086294	ENSMUST00000086294:122174055-122174115:source	-0.200921811279;0.200921811279	0.58839942562;0.58839942562	0.600;0.400	0.399;0.601	FALSE	FALSE	FALSE	1	2	1	chr5	+	122174115-122174980;122174115-122174116	122174055-122174115;122174116-122174979;122174980-122175273	(122174116, 122174979)
Ppp2r5c	ENSMUST00000084985	ENSMUST00000084985:110571418-110571428:target	0.389014601676;-0.389014601676	1.0;1.0	0.025;0.975	0.404;0.596	FALSE	FALSE	FALSE	1	2	1	chr12	+	110571380-110571418;110571417-110571418	110571370-110571380;110571381-110571417;110571418-110571428	(110571381, 110571417)
Ppp2r5c	ENSMUST00000084985	ENSMUST00000084985:110571370-110571380:source	0.243746463151;-0.243746463151	0.982581829244;0.982581829244	0.025;0.975	0.263;0.737	FALSE	FALSE	FALSE	1	2	1	chr12	+	110571380-110571418;110571380-110571381	110571370-110571380;110571381-110571417;110571418-110571428	(110571381, 110571417)
Prpf39	ENSMUST00000129956	ENSMUST00000129956:65055434-65055533:target	0.36597816034;-0.36597816034	0.997297785815;0.997297785815	0.420;0.580	0.776;0.224	FALSE	FALSE	FALSE	1	2	1	chr12	+	65055320-65055434;65055433-65055434	65055156-65055320;65055321-65055433;65055434-65055533	(65055321, 65055433)
Prrt1	ENSMUST00000015620	ENSMUST00000015620:34631770-34631955:target	0.241690187718;-0.241690187718	0.947997162827;0.947997162827	0.671;0.329	0.907;0.093	FALSE	FALSE	FALSE	1	2	1	chr17	+	34631171-34631770;34631769-34631770	34630633-34631171;34631172-34631769;34631770-34631955	(34631172, 34631769)
Ptchd2	ENSMUST00000047720	ENSMUST00000047720:148250619-148250791:target	-0.227822997556;0.227822997556	0.818040981611;0.818040981611	0.901;0.099	0.675;0.325	FALSE	TRUE	FALSE	2	2	1	chr4	-	148249867-148250619;148249862-148250619	148249741-148249867;148249741-148249867;148250619-148250791
Ptgis	ENSMUST00000088041	ENSMUST00000088041:167194860-167194870:source	-0.297465818111;0.297465818111	0.950851415324;0.950851415324	0.344;0.656	0.054;0.946	FALSE	FALSE	FALSE	1	2	1	chr2	-	167194870-167194947;167194870-167194871	167194860-167194870;167194871-167194946;167194947-167195042	(167194871, 167194946)
Ptprf	ENSMUST00000049074	ENSMUST00000049074:118248899-118249009:source	-0.37864314137;0.37864314137	0.994317781069;0.994317781069	0.746;0.254	0.377;0.623	FALSE	FALSE	TRUE	2	3	1	chr4	-	118249009-118257489;118249009-118252076	118248899-118249009;118252076-118252093;118257489-118257677
Ptprf	ENSMUST00000049074	ENSMUST00000049074:118257489-118257677:target	0.281280938968;-0.281280938968	0.890467798038;0.890467798038	0.345;0.655	0.627;0.373	FALSE	FALSE	TRUE	2	3	1	chr4	-	118252093-118257489;118249009-118257489	118248899-118249009;118252076-118252093;118257489-118257677
Ptprk	ENSMUST00000166468	ENSMUST00000166468:28554770-28554799:target	0.228595647611;-0.228595647611	0.779757841751;0.779757841751	0.559;0.441	0.791;0.209	FALSE	FALSE	TRUE	2	3	1	chr10	+	28551756-28554770;28552795-28554770	28551618-28551756;28552754-28552795;28554770-28554799
Ptprm	ENSMUST00000037974	ENSMUST00000037974:66809466-66809653:source	-0.0671967308806;-0.0572478700589;0.22657119672	0.060292088781;0.0531678516475;0.752484717219	0.286;0.332;0.382	0.165;0.218;0.617	FALSE	FALSE	TRUE	3	4	1	chr17	-	66809653-66814467;66809653-66814271;66809653-66810369	66809466-66809653;66810369-66810380;66814271-66814297;66814467-66814541
Pxdn	ENSMUST00000123244	ENSMUST00000123244:88472905-88473236:target	0.271378110254;-0.271378110254	0.976983220717;0.976983220717	0.032;0.968	0.297;0.703	FALSE	FALSE	FALSE	1	2	1	chr10	+	88472780-88472905;88472904-88472905	88472676-88472780;88472781-88472904;88472905-88473236	(88472781, 88472904)
Pxdn	ENSMUST00000122328	ENSMUST00000122328:30015451-30017658:target	-0.230674374093;0.230674374093	0.947744299858;0.947744299858	0.975;0.025	0.750;0.250	FALSE	TRUE	TRUE	2	3	1	chr12	+	30014579-30015451;30016296-30016350	30014466-30014579;30015451-30017658
Pym1	ENSMUST00000065210	ENSMUST00000065210:128748455-128748860:source	0.214927680335;-0.214927680335	0.74405207693;0.74405207693	0.052;0.948	0.269;0.731	TRUE	FALSE	TRUE	2	3	1	chr10	+	128748566-128750283;128748566-128765147	128748455-128748860;128750283-128750293;128765147-128765240
Rasip1	ENSMUST00000057927	ENSMUST00000057927:45634967-45635118:target	0.426001104868;-0.426001104868	0.999877718376;0.999877718376	0.423;0.577	0.838;0.162	FALSE	FALSE	FALSE	1	2	1	chr7	+	45634854-45634967;45634966-45634967	45634817-45634854;45634855-45634966;45634967-45635118	(45634855, 45634966)
Rasip1	ENSMUST00000057927	ENSMUST00000057927:45634817-45634854:source	0.226861988208;-0.226861988208	0.778252935377;0.778252935377	0.324;0.676	0.554;0.446	FALSE	FALSE	FALSE	1	2	1	chr7	+	45634854-45634967;45634854-45634855	45634817-45634854;45634855-45634966;45634967-45635118	(45634855, 45634966)
Rfx1	ENSMUST00000005600	ENSMUST00000005600:84094727-84094876:source	-0.21397243618;0.21397243618	0.706408573908;0.706408573908	0.528;0.472	0.303;0.697	FALSE	FALSE	FALSE	1	2	1	chr8	+	84094876-84094950;84094876-84094877	84094727-84094876;84094877-84094949;84094950-84095185	(84094877, 84094949)
Rgs11	ENSMUST00000147220	ENSMUST00000147220:26207546-26207659:target	-0.274993931869;0.274993931869	0.93714253341;0.93714253341	0.517;0.483	0.247;0.753	FALSE	FALSE	FALSE	1	2	1	chr17	+	26207457-26207546;26207545-26207546	26207396-26207457;26207458-26207545;26207546-26207659	(26207458, 26207545)
Rgs11	ENSMUST00000152676	ENSMUST00000152676:26207546-26207659:target	-0.275525523726;0.275525523726	0.934845907005;0.934845907005	0.517;0.483	0.247;0.753	FALSE	FALSE	FALSE	1	2	1	chr17	+	26207457-26207546;26207545-26207546	26207396-26207457;26207458-26207545;26207546-26207659	(26207458, 26207545)
Rgs11	ENSMUST00000122058	ENSMUST00000122058:26207546-26207659:target	-0.268019307546;0.268019307546	0.921529646239;0.921529646239	0.513;0.487	0.249;0.751	FALSE	FALSE	FALSE	1	2	1	chr17	+	26207457-26207546;26207545-26207546	26207396-26207457;26207458-26207545;26207546-26207659	(26207458, 26207545)
Rgs11	ENSMUST00000025020	ENSMUST00000025020:26207546-26207659:target	-0.266644256452;0.266644256452	0.920020306396;0.920020306396	0.513;0.487	0.250;0.750	FALSE	FALSE	FALSE	1	2	1	chr17	+	26207457-26207546;26207545-26207546	26207396-26207457;26207458-26207545;26207546-26207659	(26207458, 26207545)
Rgs11	ENSMUST00000152676	ENSMUST00000152676:26203466-26203512:source	-0.239840993146;0.239840993146	0.790200437387;0.790200437387	0.637;0.363	0.396;0.604	FALSE	FALSE	FALSE	1	2	1	chr17	+	26203512-26203578;26203512-26203513	26203466-26203512;26203513-26203577;26203578-26203684	(26203513, 26203577)
Rgs11	ENSMUST00000122058	ENSMUST00000122058:26203462-26203512:source	-0.227934971322;0.227934971322	0.775204989628;0.775204989628	0.633;0.367	0.405;0.595	FALSE	FALSE	FALSE	1	2	1	chr17	+	26203512-26203578;26203512-26203513	26203462-26203512;26203513-26203577;26203578-26203684	(26203513, 26203577)
Rgs11	ENSMUST00000126464	ENSMUST00000126464:26203462-26203512:source	-0.22916108462;0.22916108462	0.771038901539;0.771038901539	0.633;0.367	0.403;0.597	FALSE	FALSE	FALSE	1	2	1	chr17	+	26203512-26203578;26203512-26203513	26203462-26203512;26203513-26203577;26203578-26203833	(26203513, 26203577)
Rgs11	ENSMUST00000152299	ENSMUST00000152299:26203296-26203512:source	-0.22993229554;0.22993229554	0.768761971094;0.768761971094	0.633;0.367	0.402;0.598	FALSE	FALSE	FALSE	1	2	1	chr17	+	26203512-26203578;26203512-26203513	26203296-26203512;26203513-26203577;26203578-26203636	(26203513, 26203577)
Rgs11	ENSMUST00000025020	ENSMUST00000025020:26203462-26203512:source	-0.224543009579;0.224543009579	0.759835596962;0.759835596962	0.630;0.370	0.404;0.596	FALSE	FALSE	FALSE	1	2	1	chr17	+	26203512-26203578;26203512-26203513	26203462-26203512;26203513-26203577;26203578-26203684	(26203513, 26203577)
Rgs11	ENSMUST00000146683	ENSMUST00000146683:26203462-26203512:source	-0.224787334543;0.224787334543	0.745808778943;0.745808778943	0.632;0.368	0.406;0.594	FALSE	FALSE	FALSE	1	2	1	chr17	+	26203512-26203578;26203512-26203513	26203462-26203512;26203513-26203577;26203578-26203975	(26203513, 26203577)
Rgt2	ENSMUST00000173258	ENSMUST00000173258:33931726-33931809:target	-0.282637201746;0.282637201746	0.912591909709;0.912591909709	0.457;0.543	0.177;0.823	FALSE	FALSE	FALSE	1	2	1	chr17	+	33931634-33931726;33931725-33931726	33931211-33931634;33931635-33931725;33931726-33931809	(33931635, 33931725)
Rhbdl3	ENSMUST00000017836	ENSMUST00000017836:80302664-80302687:source	-0.218111325493;0.218111325493	0.781797050619;0.781797050619	0.624;0.376	0.407;0.593	FALSE	FALSE	FALSE	1	2	1	chr11	+	80302687-80319558;80302687-80302688	80302664-80302687;80302688-80302722;80319558-80319716	(80302688, 80302722)
Rhot2	ENSMUST00000176604	ENSMUST00000176604:25841605-25841667:source	-0.208278749422;0.208278749422	0.766486389273;0.766486389273	0.879;0.121	0.674;0.326	FALSE	FALSE	FALSE	1	2	1	chr17	-	25841667-25841757;25841667-25841668	25841605-25841667;25841668-25841756;25841757-25841855	(25841668, 25841756)
Rnaseh2a	ENSMUST00000065049	ENSMUST00000065049:84957667-84957853:source	0.264040211208;-0.264040211208	0.861059423254;0.861059423254	0.083;0.917	0.350;0.650	FALSE	FALSE	FALSE	1	2	1	chr8	-	84957853-84957966;84957853-84957854	84957667-84957853;84957854-84957965;84957966-84958089	(84957854, 84957965)
Rpl10	ENSMUST00000135690	ENSMUST00000135690:74272915-74273085:target	-0.254499203656;0.254499203656	0.928770373767;0.928770373767	0.515;0.485	0.266;0.734	FALSE	FALSE	FALSE	1	2	1	chrX	+	74272317-74272915;74272914-74272915	74272179-74272317;74272318-74272914;74272915-74273085	(74272318, 74272914)
Rpl22	ENSMUST00000126519	ENSMUST00000126519:152327481-152327585:target	0.357746709028;-0.357746709028	0.992599875438;0.992599875438	0.424;0.576	0.774;0.226	FALSE	FALSE	FALSE	1	2	1	chr4	+	152327359-152327481;152327480-152327481	152327067-152327359;152327360-152327480;152327481-152327585	(152327360, 152327480)
Rundc1	ENSMUST00000040561	ENSMUST00000040561:101425085-101425616:source	0.407794297405;-0.0306158802283;-0.344566751739	0.999999554569;0.00110770645556;0.999338957732	0.101;0.279;0.619	0.499;0.218;0.283	TRUE	TRUE	TRUE	3	3	1	chr11	+	101425610-101428366;101425610-101429452;101425616-101429452	101425085-101425616;101428366-101428371;101429452-101429610;101429452-101429610
Rundc1	ENSMUST00000040561	ENSMUST00000040561:101429452-101429610:target	-0.0247742849375;-0.321842441265;0.373498188799	0.000736329642613;0.995409870908;0.999973175205	0.275;0.605;0.120	0.225;0.292;0.484	TRUE	FALSE	TRUE	3	3	1	chr11	+	101425610-101429452;101425616-101429452;101428371-101429452	101425085-101425616;101425085-101425616;101428366-101428371;101429452-101429610
Rundc3a	ENSMUST00000107105	ENSMUST00000107105:102400637-102400798:target	0.215674520415;-0.215674520415	0.785410929944;0.785410929944	0.458;0.542	0.669;0.331	FALSE	FALSE	FALSE	1	2	1	chr11	+	102400045-102400637;102400636-102400637	102399888-102400045;102400046-102400636;102400637-102400798	(102400046, 102400636)
Sap25	ENSMUST00000177466	ENSMUST00000177466:137642096-137642234:target	0.21335633055;-0.21335633055	0.76658804118;0.76658804118	0.748;0.252	0.959;0.041	FALSE	FALSE	FALSE	1	2	1	chr5	+	137642013-137642096;137642095-137642096	137641910-137642013;137642014-137642095;137642096-137642234	(137642014, 137642095)
Sap25	ENSMUST00000166099	ENSMUST00000166099:137642096-137642234:target	0.212580136598;-0.212580136598	0.764706368952;0.764706368952	0.749;0.251	0.959;0.041	FALSE	FALSE	FALSE	1	2	1	chr5	+	137642013-137642096;137642095-137642096	137641910-137642013;137642014-137642095;137642096-137642234	(137642014, 137642095)
Sat1	ENSMUST00000152463	ENSMUST00000152463:155215121-155215230:target	0.204137408532;-0.204137408532	0.710038317046;0.710038317046	0.186;0.814	0.389;0.611	FALSE	FALSE	FALSE	1	2	1	chrX	-	155214134-155215121;155215120-155215121	155214033-155214134;155214135-155215120;155215121-155215230	(155214135, 155215120)
Selplg	ENSMUST00000100874	ENSMUST00000100874:113818547-113820248:source	0.289145768868;-0.0547942268692;0.019611475424;-0.0829714543251;-0.00199030199557;-0.00107923786606;0.0484313428428;-0.0276486728913;-0.0389066502843	0.983189886206;1.97713079924e-09;3.42893119377e-08;3.97074080493e-06;9.65498907057e-18;1.72532766448e-16;3.83532774842e-05;0.000335895180439;3.31439144478e-17	0.397;0.086;0.038;0.119;0.030;0.028;0.030;0.179;0.069	0.679;0.025;0.070;0.025;0.025;0.025;0.100;0.132;0.025	TRUE	TRUE	TRUE	9	3	1	chr5	-	113820248-113830349;113819752-113819783;113819722-113819783;113819722-113819753;113819692-113819813;113819692-113819783;113819692-113819753;113819662-113819693;113819602-113819633	113818547-113820248;113830349-113830501
Slx1b	ENSMUST00000144897	ENSMUST00000144897:126691928-126692055:target	-0.323197532167;0.323197532167	0.98826878419;0.98826878419	0.779;0.221	0.464;0.536	FALSE	FALSE	FALSE	1	2	1	chr7	-	126691823-126691928;126691927-126691928	126691739-126691823;126691824-126691927;126691928-126692055	(126691824, 126691927)
Slx1b	ENSMUST00000142337	ENSMUST00000142337:126691928-126692055:target	-0.326523049912;0.326523049912	0.987516113538;0.987516113538	0.780;0.220	0.462;0.538	FALSE	FALSE	FALSE	1	2	1	chr7	-	126691823-126691928;126691927-126691928	126691739-126691823;126691824-126691927;126691928-126692055	(126691824, 126691927)
Slx1b	ENSMUST00000084586	ENSMUST00000084586:126691928-126692659:target	-0.320116098796;0.320116098796	0.984739089287;0.984739089287	0.778;0.222	0.465;0.535	FALSE	FALSE	FALSE	1	2	1	chr7	-	126691823-126691928;126691927-126691928	126691739-126691823;126691824-126691927;126691928-126692659	(126691824, 126691927)
Snhg14	ENSMUST00000189581	ENSMUST00000189581:59973847-59973899:source	0.381926730295;-0.381926730295	0.997859232807;0.997859232807	0.184;0.816	0.557;0.443	FALSE	FALSE	FALSE	1	2	1	chr7	-	59973899-59973997;59973899-59973900	59973847-59973899;59973900-59973996;59973997-59975759	(59973900, 59973996)
Sptan1	ENSMUST00000113719	ENSMUST00000113719:30029620-30029674:target	0.227127827508;-0.227127827508	0.840506981656;0.840506981656	0.317;0.683	0.540;0.460	FALSE	FALSE	FALSE	1	2	1	chr2	+	30028706-30029620;30029619-30029620	30028644-30028706;30028707-30029619;30029620-30029674	(30028707, 30029619)
Sptan1	ENSMUST00000129241	ENSMUST00000129241:30029620-30029674:target	0.22527500113;-0.22527500113	0.813116408311;0.813116408311	0.318;0.682	0.540;0.460	FALSE	FALSE	FALSE	1	2	1	chr2	+	30028706-30029620;30029619-30029620	30028644-30028706;30028707-30029619;30029620-30029674	(30028707, 30029619)
Srpk3	ENSMUST00000002081	ENSMUST00000002081:73777924-73778031:source	0.392880717018;-0.392880717018	0.996391572685;0.996391572685	0.395;0.605	0.778;0.222	FALSE	FALSE	FALSE	1	2	1	chrX	+	73778031-73778105;73778031-73778032	73777924-73778031;73778032-73778104;73778105-73778174	(73778032, 73778104)
Srpk3	ENSMUST00000136664	ENSMUST00000136664:73777924-73778031:source	0.395611254261;-0.395611254261	0.996173764696;0.996173764696	0.394;0.606	0.780;0.220	FALSE	FALSE	FALSE	1	2	1	chrX	+	73778031-73778105;73778031-73778032	73777924-73778031;73778032-73778104;73778105-73778346	(73778032, 73778104)
Srsf6	ENSMUST00000017065	ENSMUST00000017065:162933426-162933550:target	0.27902366906;-0.27902366906	0.996870564098;0.996870564098	0.143;0.857	0.415;0.585	FALSE	FALSE	FALSE	1	2	1	chr2	+	162933082-162933426;162933425-162933426	162932815-162933082;162933083-162933425;162933426-162933550	(162933083, 162933425)
Srsf6	ENSMUST00000017065	ENSMUST00000017065:162932815-162933082:source	0.275355955621;-0.275355955621	0.974610212321;0.974610212321	0.266;0.734	0.534;0.466	FALSE	FALSE	FALSE	1	2	1	chr2	+	162933082-162933426;162933082-162933083	162932815-162933082;162933083-162933425;162933426-162933550	(162933083, 162933425)
Srsf7	ENSMUST00000063417	ENSMUST00000063417:80204622-80205081:target	-0.000744199687317;0.301041785947;-0.279792823083	9.2870726398e-18;0.999726786718;0.998117458434	0.027;0.038;0.923	0.025;0.331;0.650	TRUE	TRUE	FALSE	2	2	1	chr17	-	80204387-80204975;80204387-80204622;80204621-80204622	80204313-80204387;80204313-80204387;80204388-80204621;80204622-80205081	(80204388, 80204621)
Sycp3	ENSMUST00000020252	ENSMUST00000020252:88472905-88473235:target	0.267344616176;-0.267344616176	0.971997262262;0.971997262262	0.032;0.968	0.293;0.707	FALSE	FALSE	FALSE	1	2	1	chr10	+	88472780-88472905;88472904-88472905	88472676-88472780;88472781-88472904;88472905-88473235	(88472781, 88472904)
Tars2	ENSMUST00000196077	ENSMUST00000196077:95750867-95750984:target	-0.222162052532;0.222162052532	0.833035605601;0.833035605601	0.819;0.181	0.601;0.399	FALSE	FALSE	FALSE	1	2	1	chr3	-	95750765-95750867;95750866-95750867	95750701-95750765;95750766-95750866;95750867-95750984	(95750766, 95750866)
Tars2	ENSMUST00000198289	ENSMUST00000198289:95750867-95750984:target	-0.220711985313;0.220711985313	0.828870647626;0.828870647626	0.819;0.181	0.602;0.398	FALSE	FALSE	FALSE	1	2	1	chr3	-	95750765-95750867;95750866-95750867	95750701-95750765;95750766-95750866;95750867-95750984	(95750766, 95750866)
Tars2	ENSMUST00000098857	ENSMUST00000098857:95750867-95750984:target	-0.22040052745;0.22040052745	0.828325913555;0.828325913555	0.820;0.180	0.604;0.396	FALSE	FALSE	FALSE	1	2	1	chr3	-	95750765-95750867;95750866-95750867	95750701-95750765;95750766-95750866;95750867-95750984	(95750766, 95750866)
Tars2	ENSMUST00000074339	ENSMUST00000074339:95750867-95750984:target	-0.220486837754;0.220486837754	0.826859909439;0.826859909439	0.819;0.181	0.603;0.397	FALSE	FALSE	FALSE	1	2	1	chr3	-	95750765-95750867;95750866-95750867	95750701-95750765;95750766-95750866;95750867-95750984	(95750766, 95750866)
Tars2	ENSMUST00000029752	ENSMUST00000029752:95750867-95750984:target	-0.219397246171;0.219397246171	0.816964375308;0.816964375308	0.819;0.181	0.603;0.397	FALSE	FALSE	FALSE	1	2	1	chr3	-	95750765-95750867;95750866-95750867	95750701-95750765;95750766-95750866;95750867-95750984	(95750766, 95750866)
Tars2	ENSMUST00000199464	ENSMUST00000199464:95750867-95750984:target	-0.22052125361;0.22052125361	0.810926801589;0.810926801589	0.818;0.182	0.601;0.399	FALSE	FALSE	FALSE	1	2	1	chr3	-	95750765-95750867;95750866-95750867	95750701-95750765;95750766-95750866;95750867-95750984	(95750766, 95750866)
Tars2	ENSMUST00000198007	ENSMUST00000198007:95750701-95750765:source	0.205783129086;-0.205783129086	0.632784923557;0.632784923557	0.164;0.836	0.403;0.597	FALSE	FALSE	FALSE	1	2	1	chr3	-	95750765-95750838;95750765-95750766	95750701-95750765;95750766-95750837;95750838-95750984	(95750766, 95750837)
Tars2	ENSMUST00000196475	ENSMUST00000196475:95750701-95750765:source	0.2048413335;-0.2048413335	0.630196621029;0.630196621029	0.165;0.835	0.404;0.596	FALSE	FALSE	FALSE	1	2	1	chr3	-	95750765-95750838;95750765-95750766	95750701-95750765;95750766-95750837;95750838-95751027	(95750766, 95750837)
Tars2	ENSMUST00000196868	ENSMUST00000196868:95750701-95750765:source	0.20154931741;-0.20154931741	0.616966182932;0.616966182932	0.164;0.836	0.401;0.599	FALSE	FALSE	FALSE	1	2	1	chr3	-	95750765-95750838;95750765-95750766	95750701-95750765;95750766-95750837;95750838-95750984	(95750766, 95750837)
Tbc1d10c	ENSMUST00000045864	ENSMUST00000045864:4184358-4185073:source	0.205879109666;-0.205879109666	0.693787395608;0.693787395608	0.076;0.924	0.292;0.708	FALSE	FALSE	TRUE	2	3	1	chr19	-	4185073-4188944;4185073-4185352	4184358-4185073;4185352-4185506;4188944-4189058
Tex40	ENSMUST00000057716	ENSMUST00000057716:6924794-6925123:target	-0.14105487892;0.180571968821;-0.0561465733799;0.0285003712097	0.30958054052;0.558440219272;0.00201510246443;0.000218406028143	0.348;0.378;0.145;0.129	0.185;0.572;0.060;0.184	FALSE	TRUE	TRUE	4	4	1	chr19	-	6923685-6924794;6923599-6924794;6923367-6924794;6922660-6924794	6922426-6922660;6923301-6923367;6923523-6923685;6923523-6923685;6924794-6925123
Thumpd3	ENSMUST00000134657	ENSMUST00000134657:113050757-113051037:target	-0.207537168415;0.207537168415	0.72385643661;0.72385643661	0.964;0.036	0.755;0.245	FALSE	FALSE	TRUE	2	3	1	chr6	+	113049416-113050757;113049917-113050757	113049339-113049416;113049907-113049917;113050757-113051037
Tial1	ENSMUST00000106226	ENSMUST00000106226:128443807-128443946:source	0.22241632823;-0.22241632823	0.861233951245;0.861233951245	0.536;0.464	0.753;0.247	FALSE	FALSE	FALSE	1	2	1	chr7	-	128443946-128444281;128443946-128443947	128443807-128443946;128443947-128444280;128444281-128444404	(128443947, 128444280)
Tial1	ENSMUST00000106228	ENSMUST00000106228:128443807-128443946:source	0.217938108754;-0.217938108754	0.839129731044;0.839129731044	0.540;0.460	0.753;0.247	FALSE	FALSE	FALSE	1	2	1	chr7	-	128443946-128444281;128443946-128443947	128443807-128443946;128443947-128444280;128444281-128444404	(128443947, 128444280)
Tial1	ENSMUST00000133089	ENSMUST00000133089:128443814-128443946:source	0.21848746949;-0.21848746949	0.828219501971;0.828219501971	0.536;0.464	0.750;0.250	FALSE	FALSE	FALSE	1	2	1	chr7	-	128443946-128444281;128443946-128443947	128443814-128443946;128443947-128444280;128444281-128444404	(128443947, 128444280)
Tial1	ENSMUST00000165023	ENSMUST00000165023:128443807-128443946:source	0.215484843386;-0.215484843386	0.81482684859;0.81482684859	0.541;0.459	0.752;0.248	FALSE	FALSE	FALSE	1	2	1	chr7	-	128443946-128444281;128443946-128443947	128443807-128443946;128443947-128444280;128444281-128444404	(128443947, 128444280)
Tial1	ENSMUST00000141126	ENSMUST00000141126:128443807-128443946:source	0.215835050517;-0.215835050517	0.804486511894;0.804486511894	0.540;0.460	0.751;0.249	FALSE	FALSE	FALSE	1	2	1	chr7	-	128443946-128444281;128443946-128443947	128443807-128443946;128443947-128444280;128444281-128444404	(128443947, 128444280)
Tial1	ENSMUST00000033135	ENSMUST00000033135:128443807-128443946:source	0.21790374164;-0.21790374164	0.803375926524;0.803375926524	0.539;0.461	0.752;0.248	FALSE	FALSE	FALSE	1	2	1	chr7	-	128443946-128444281;128443946-128443947	128443807-128443946;128443947-128444280;128444281-128444404	(128443947, 128444280)
Tial1	ENSMUST00000123666	ENSMUST00000123666:128443807-128443946:source	0.21341472112;-0.21341472112	0.802095968952;0.802095968952	0.538;0.462	0.747;0.253	FALSE	FALSE	FALSE	1	2	1	chr7	-	128443946-128444281;128443946-128443947	128443807-128443946;128443947-128444280;128444281-128444404	(128443947, 128444280)
Tjp2	ENSMUST00000099558	ENSMUST00000099558:24100702-24100914:target	0.240980410654;-0.240980410654	0.878430209391;0.878430209391	0.539;0.461	0.776;0.224	FALSE	FALSE	TRUE	2	3	1	chr19	-	24099563-24100702;24098315-24100702	24098001-24098315;24099453-24099563;24100702-24100914
Tmem44	ENSMUST00000089775	ENSMUST00000089775:30549393-30549457:source	0.291357299564;-0.291357299564	0.979685788726;0.979685788726	0.225;0.775	0.509;0.491	FALSE	FALSE	FALSE	1	2	1	chr16	-	30549457-30550363;30549457-30549458	30549393-30549457;30549458-30550362;30550363-30550570	(30549458, 30550362)
Tmem44	ENSMUST00000144001	ENSMUST00000144001:30549393-30549461:source	0.217814704791;-0.217814704791	0.75135479669;0.75135479669	0.218;0.782	0.435;0.565	FALSE	FALSE	FALSE	1	2	1	chr16	-	30549461-30550363;30549461-30549462	30549393-30549461;30549462-30550362;30550363-30550578	(30549462, 30550362)
Tmpo	ENSMUST00000072239	ENSMUST00000072239:91153085-91153180:source	0.235895221707;-0.235895221707	0.780702259127;0.780702259127	0.670;0.330	0.911;0.089	FALSE	FALSE	FALSE	1	2	1	chr10	-	91153180-91153278;91153180-91153181	91153085-91153180;91153181-91153277;91153278-91153397	(91153181, 91153277)
Tns3	ENSMUST00000020695	ENSMUST00000020695:8431652-8434638:source	-0.278835139036;6.14259022313e-08;0.268393674157	0.960733236843;9.06458718069e-18;0.939528679528	0.801;0.025;0.193	0.529;0.025;0.455	TRUE	TRUE	TRUE	3	3	1	chr11	-	8434638-8435716;8432705-8432796;8432705-8432751	8431652-8434638;8435716-8435742
Trmt5	ENSMUST00000116420	ENSMUST00000116420:73280410-73280901:source	-0.0280084601339;0.217559613216;-0.172170378386	1.98078558161e-10;0.790812386077;0.499512173194	0.078;0.204;0.718	0.038;0.419;0.538	TRUE	TRUE	TRUE	3	3	1	chr12	-	73280901-73280926;73280632-73282612;73280632-73281005	73280410-73280901;73280926-73281656;73280926-73281656;73282612-73282736
Trmt5	ENSMUST00000116420	ENSMUST00000116420:73282612-73282736:target	-0.229818539014;0.229818539014	0.825837386401;0.825837386401	0.715;0.285	0.487;0.513	FALSE	FALSE	TRUE	2	3	1	chr12	-	73281656-73282612;73280632-73282612	73280410-73280901;73280926-73281656;73282612-73282736
Trnau1ap	ENSMUST00000147652	ENSMUST00000147652:132325208-132325260:source	0.293276667567;-0.293276667567	0.94662263552;0.94662263552	0.394;0.606	0.682;0.318	FALSE	FALSE	FALSE	1	2	1	chr4	-	132325260-132325352;132325260-132325261	132325208-132325260;132325261-132325351;132325352-132325489	(132325261, 132325351)
Tspan14	ENSMUST00000047652	ENSMUST00000047652:40966776-40966807:target	-0.225908448782;0.225908448782	0.829339555443;0.829339555443	0.959;0.041	0.736;0.264	FALSE	FALSE	TRUE	2	3	1	chr14	-	40934285-40966776;40918680-40966776	40918630-40918680;40934188-40934285;40966776-40966807
Tsr1	ENSMUST00000128230	ENSMUST00000128230:74905891-74906023:target	0.24093394714;-0.24093394714	0.933848492914;0.933848492914	0.355;0.645	0.590;0.410	FALSE	FALSE	FALSE	1	2	1	chr11	+	74905316-74905891;74905890-74905891	74905206-74905316;74905317-74905890;74905891-74906023	(74905317, 74905890)
Tsr1	ENSMUST00000130910	ENSMUST00000130910:74905891-74906023:target	0.244607962347;-0.244607962347	0.929949912851;0.929949912851	0.343;0.657	0.582;0.418	FALSE	FALSE	FALSE	1	2	1	chr11	+	74905316-74905891;74905890-74905891	74905211-74905316;74905317-74905890;74905891-74906023	(74905317, 74905890)
Tsr1	ENSMUST00000045807	ENSMUST00000045807:74905891-74906023:target	0.245181676983;-0.245181676983	0.925619661421;0.925619661421	0.351;0.649	0.590;0.410	FALSE	FALSE	FALSE	1	2	1	chr11	+	74905316-74905891;74905890-74905891	74905206-74905316;74905317-74905890;74905891-74906023	(74905317, 74905890)
Tsr1	ENSMUST00000153316	ENSMUST00000153316:74905891-74906023:target	0.240119826099;-0.240119826099	0.924631713855;0.924631713855	0.353;0.647	0.588;0.412	FALSE	FALSE	FALSE	1	2	1	chr11	+	74905316-74905891;74905890-74905891	74905206-74905316;74905317-74905890;74905891-74906023	(74905317, 74905890)
Tsr1	ENSMUST00000045807	ENSMUST00000045807:74905206-74905316:target	0.215920387238;-0.215920387238	0.777802355888;0.777802355888	0.283;0.717	0.495;0.505	FALSE	FALSE	FALSE	1	2	1	chr11	+	74904991-74905206;74905205-74905206	74904829-74904991;74904992-74905205;74905206-74905316	(74904992, 74905205)
Tsr1	ENSMUST00000128230	ENSMUST00000128230:74905206-74905316:target	0.206366484483;-0.206366484483	0.736095037185;0.736095037185	0.286;0.714	0.489;0.511	FALSE	FALSE	FALSE	1	2	1	chr11	+	74904991-74905206;74905205-74905206	74904829-74904991;74904992-74905205;74905206-74905316	(74904992, 74905205)
Usp28	ENSMUST00000047349	ENSMUST00000047349:49032214-49032353:source	-0.102353177825;0.253260732403;-0.101773758286	0.00884953023678;0.933214978113;0.102439919039	0.142;0.574;0.284	0.026;0.822;0.151	FALSE	FALSE	TRUE	3	4	1	chr9	+	49032353-49032509;49032353-49033577;49032353-49035593	49032214-49032353;49032509-49032519;49033577-49033672;49035593-49035771
Wasf3	ENSMUST00000016143	ENSMUST00000016143:146455544-146455661:source	0.216417762678;-0.216417762678	0.817867294322;0.817867294322	0.621;0.379	0.833;0.167	FALSE	FALSE	TRUE	2	3	1	chr5	+	146455661-146460965;146455661-146465850	146455544-146455661;146460965-146461140;146465850-146466019
Wdr24	ENSMUST00000026833	ENSMUST00000026833:25828154-25828338:source	-0.2022966031;0.2022966031	0.720339417773;0.720339417773	0.905;0.095	0.706;0.294	FALSE	FALSE	FALSE	1	2	1	chr17	+	25828338-25828415;25828338-25828339	25828154-25828338;25828339-25828414;25828415-25828730	(25828339, 25828414)
Wnk4	ENSMUST00000103108	ENSMUST00000103108:101275630-101275690:target	-0.489191137384;0.489191137384	0.999945845775;0.999945845775	0.921;0.079	0.444;0.556	FALSE	FALSE	FALSE	1	2	1	chr11	+	101275549-101275630;101275629-101275630	101274975-101275549;101275550-101275629;101275630-101275690	(101275550, 101275629)
Wnk4	ENSMUST00000147741	ENSMUST00000147741:101275630-101275690:target	-0.48544607983;0.48544607983	0.999938164973;0.999938164973	0.921;0.079	0.447;0.553	FALSE	FALSE	FALSE	1	2	1	chr11	+	101275549-101275630;101275629-101275630	101274975-101275549;101275550-101275629;101275630-101275690	(101275550, 101275629)
Zbtb17	ENSMUST00000130482	ENSMUST00000130482:141465415-141465436:source	-0.389266761149;0.389266761149	0.995537657764;0.995537657764	0.868;0.132	0.489;0.511	FALSE	FALSE	FALSE	1	2	1	chr4	+	141465436-141465524;141465436-141465437	141465415-141465436;141465437-141465523;141465524-141465640	(141465437, 141465523)
Zbtb20	ENSMUST00000131689	ENSMUST00000131689:42955616-42955626:source	0.34455214784;-0.34455214784	0.994329498462;0.994329498462	0.036;0.964	0.372;0.628	FALSE	FALSE	FALSE	1	2	1	chr16	+	42955626-42955650;42955626-42955627	42955616-42955626;42955627-42955649;42955650-42955660	(42955627, 42955649)
Zc3h8	ENSMUST00000028866	ENSMUST00000028866:128935312-128935546:target	-0.188544108949;-0.0168061716892;0.244184341402	0.60410833589;0.0023857178762;0.900198718915	0.223;0.736;0.039	0.033;0.687;0.278	TRUE	TRUE	TRUE	3	3	1	chr2	-	128933332-128935324;128933332-128935312;128931400-128935312	128931278-128931400;128933199-128933332;128933199-128933332;128935312-128935546
Zgpat	ENSMUST00000116366	ENSMUST00000116366:181382194-181382314:target	0.258771000218;-0.258771000218	0.984907208671;0.984907208671	0.080;0.920	0.332;0.668	FALSE	FALSE	FALSE	1	2	1	chr2	+	181381394-181382194;181382193-181382194	181380375-181381394;181381395-181382193;181382194-181382314	(181381395, 181382193)
Zgpat	ENSMUST00000116366	ENSMUST00000116366:181380375-181381394:source	0.217657661793;-0.217657661793	0.83434645169;0.83434645169	0.134;0.866	0.347;0.653	FALSE	FALSE	FALSE	1	2	1	chr2	+	181381394-181382194;181381394-181381395	181380375-181381394;181381395-181382193;181382194-181382314	(181381395, 181382193)

## Sheet: Liver-Adar KO-MasterTable
#Gene Name	Transcript ID	LSV ID	E(dPSI) per LSV junction	P(|E(dPSI)|>=0.20) per LSV junction	Liver Adar WT E(PSI)	Liver Adar KO E(PSI)	A5SS	A3SS	ES	Num. Junctions	Num. Exons	De Novo Junctions?	Chr	Strand	Junctions Coordinates	Exons Coordinates	IR Coordinates
5830473C10Rik	ENSMUST00000094615	ENSMUST00000094615:90592871-90593003:target	0.2954400926361693;-0.2954400926361678	0.9995252725351491;0.9995252725351491	0.685;0.315	0.975;0.025	FALSE	FALSE	TRUE	2	3	1	chr5	+	90584992-90592871;90586806-90592871	90584766-90584992;90586796-90586806;90592871-90593003
Arhgap42	ENSMUST00000093893	ENSMUST00000093893:9003620-9004120:source	0.21201362266185092;-0.2120136226618494	0.7084969900898662;0.7084969900898662	0.025;0.975	0.248;0.752	FALSE	TRUE	TRUE	2	3	1	chr9	-	9004120-9004144;9003682-9005734	9003620-9004120;9004144-9004154;9005734-9005890
Arid5b	ENSMUST00000020106	ENSMUST00000020106:68134994-68135106:source	0.2825165485638408;-0.2825165485638393	0.9399161591120032;0.9399161591120032	0.254;0.746	0.538;0.462	FALSE	FALSE	TRUE	2	3	1	chr10	-	68135106-68186026;68135106-68136486	68134994-68135106;68136486-68136496;68186026-68186256
Arntl	ENSMUST00000047321	ENSMUST00000047321:113283257-113283295:target	-0.30273226336762776;0.3027322633676293	0.9850954770863659;0.9850954770863659	0.970;0.030	0.670;0.330	FALSE	FALSE	TRUE	2	3	1	chr7	+	113280802-113283257;113281422-113283257	113280650-113280802;113281402-113281422;113283257-113283295
Arntl	ENSMUST00000047321	ENSMUST00000047321:113280650-113280802:source	0.3041326117750879;-0.3041326117750864	0.9850332949507647;0.9850332949507647	0.030;0.970	0.331;0.669	FALSE	FALSE	TRUE	2	3	1	chr7	+	113280802-113281402;113280802-113283257	113280650-113280802;113281402-113281422;113283257-113283295
Aspg	ENSMUST00000079400	ENSMUST00000079400:112120865-112121047:source	-0.27628274150406;0.2762827415040617	0.9862015558141007;0.9862015558141007	0.974;0.026	0.700;0.300	FALSE	FALSE	FALSE	1	2	1	chr12	+	112121047-112121153;112121047-112121048	112120865-112121047;112121048-112121152;112121153-112121266	(112121048, 112121152)
Aspscr1	ENSMUST00000106160	ENSMUST00000106160:120708930-120708999:source	-0.2580029563174852;0.25800295631748676	0.9133940693795349;0.9133940693795349	0.970;0.030	0.708;0.292	FALSE	FALSE	FALSE	1	2	1	chr11	+	120708999-120709071;120708999-120709000	120708930-120708999;120709000-120709070;120709071-120709246	(120709000, 120709070)
Aspscr1	ENSMUST00000106158	ENSMUST00000106158:120708930-120708999:source	-0.25841454335138697;0.25841454335138864	0.9125601234892999;0.9125601234892999	0.970;0.030	0.707;0.293	FALSE	FALSE	FALSE	1	2	1	chr11	+	120708999-120709071;120708999-120709000	120708930-120708999;120709000-120709070;120709071-120709246	(120709000, 120709070)
Aspscr1	ENSMUST00000106159	ENSMUST00000106159:120708930-120708999:source	-0.2585250338295277;0.2585250338295292	0.9142100362028784;0.9142100362028784	0.970;0.030	0.707;0.293	FALSE	FALSE	FALSE	1	2	1	chr11	+	120708999-120709071;120708999-120709000	120708930-120708999;120709000-120709070;120709071-120709246	(120709000, 120709070)
Aspscr1	ENSMUST00000151531	ENSMUST00000151531:120708760-120708999:source	-0.2818658500593736;0.2818658500593751	0.9429566968186297;0.9429566968186297	0.967;0.033	0.682;0.318	FALSE	FALSE	FALSE	1	2	1	chr11	+	120708999-120709071;120708999-120709000	120708760-120708999;120709000-120709070;120709071-120709246	(120709000, 120709070)
Aspscr1	ENSMUST00000166838	ENSMUST00000166838:120708930-120708999:source	-0.25649784455736735;0.25649784455736885	0.90472541386717;0.90472541386717	0.970;0.030	0.709;0.291	FALSE	FALSE	FALSE	1	2	1	chr11	+	120708999-120709071;120708999-120709000	120708930-120708999;120709000-120709070;120709071-120709246	(120709000, 120709070)
Aspscr1	ENSMUST00000026135	ENSMUST00000026135:120708930-120708999:source	-0.2597472756605378;0.2597472756605392	0.9168499119583274;0.9168499119583274	0.970;0.030	0.706;0.294	FALSE	FALSE	FALSE	1	2	1	chr11	+	120708999-120709071;120708999-120709000	120708930-120708999;120709000-120709070;120709071-120709246	(120709000, 120709070)
Aspscr1	ENSMUST00000168714	ENSMUST00000168714:120708930-120708999:source	-0.2603452907234476;0.26034529072344925	0.9207139799895077;0.9207139799895077	0.970;0.030	0.706;0.294	FALSE	FALSE	FALSE	1	2	1	chr11	+	120708999-120709071;120708999-120709000	120708930-120708999;120709000-120709070;120709071-120709072	(120709000, 120709070)
Aspscr1	ENSMUST00000103016	ENSMUST00000103016:120708930-120708999:source	-0.25865420349483514;0.25865420349483675	0.9144203816046604;0.9144203816046604	0.970;0.030	0.707;0.293	FALSE	FALSE	FALSE	1	2	1	chr11	+	120708999-120709071;120708999-120709000	120708930-120708999;120709000-120709070;120709071-120709246	(120709000, 120709070)
Atg101	ENSMUST00000048393	ENSMUST00000048393:101286933-101287250:target	0.225414844560423;-0.13719380102700124;-0.07119601936495862	0.7778955538084017;0.18726963068801133;0.0008043756770803948	0.517;0.335;0.148	0.752;0.180;0.069	FALSE	FALSE	TRUE	2	3	1	chr15	+	101284545-101286933;101286810-101286933;101286932-101286933	101284301-101284545;101286800-101286810;101286811-101286932;101286933-101287250	(101286811, 101286932)
Bace1	ENSMUST00000034591	ENSMUST00000034591:45860054-45864399:target	-0.30221879570626364;0.30221879570626525	0.9873236381479533;0.9873236381479533	0.975;0.025	0.675;0.325	FALSE	TRUE	TRUE	2	3	1	chr9	+	45859450-45860054;45862597-45862628	45859279-45859450;45860054-45864399
BC003965	ENSMUST00000088307	ENSMUST00000088307:25184720-25187661:target	-0.28498649377133256;0.2849864937713341	0.8780314367437698;0.8780314367437698	0.510;0.490	0.214;0.786	FALSE	FALSE	FALSE	1	2	1	chr17	+	25184640-25184720;25184719-25184720	25184561-25184640;25184641-25184719;25184720-25187661	(25184641, 25184719)
Capn7	ENSMUST00000143472	ENSMUST00000143472:31370702-31370794:source	-0.25412322818263355;0.25412322818263516	0.9024557113243732;0.9024557113243732	0.916;0.084	0.658;0.342	FALSE	FALSE	FALSE	1	2	1	chr14	+	31370794-31370878;31370794-31370795	31370702-31370794;31370795-31370877;31370878-31371986	(31370795, 31370877)
Capn7	ENSMUST00000022451	ENSMUST00000022451:31370702-31370794:source	-0.2537987487210961;0.2537987487210977	0.8986875004207945;0.8986875004207945	0.915;0.085	0.657;0.343	FALSE	FALSE	FALSE	1	2	1	chr14	+	31370794-31370878;31370794-31370795	31370702-31370794;31370795-31370877;31370878-31371984	(31370795, 31370877)
Cers6	ENSMUST00000028426	ENSMUST00000028426:69108442-69114282:target	-0.1389671098533075;-0.09943085957962391;0.304484175373638	0.2715025492791915;0.013641004056374981;0.9512299047246818	0.655;0.135;0.210	0.482;0.025;0.516	TRUE	TRUE	TRUE	3	3	1	chr2	+	69105159-69108442;69113020-69113073;69113072-69113177	69105003-69105159;69108442-69114282
Cfi	ENSMUST00000077918	ENSMUST00000077918:129865341-129865397:target	-0.2040364608671087;0.20403646086711022	0.6923228263724294;0.6923228263724294	0.437;0.563	0.231;0.769	FALSE	FALSE	TRUE	2	3	1	chr3	+	129861992-129865341;129862150-129865341	129861966-129861992;129862130-129862150;129865341-129865397
Cyp2b9	ENSMUST00000082214	ENSMUST00000082214:26181002-26181049:source	-0.133234575802793;-0.07479350194849174;0.2090004994872205	0.06918033573767837;0.00021386887329217157;0.735264454785857	0.173;0.152;0.676	0.034;0.074;0.886	FALSE	FALSE	TRUE	2	3	1	chr7	+	26181049-26181607;26181049-26186581;26181049-26181050	26181002-26181049;26181050-26181606;26181607-26181617;26186581-26186800	(26181050, 26181606)
Cyp2b9	ENSMUST00000082214	ENSMUST00000082214:26181002-26181049:target	-0.17195655932139958;-0.0007058666915411243;-0.05083305139505348;0.25592197017419394	0.39951193047451583;2.620409349515437e-17;1.1468110925140756e-10;0.9561344271919748	0.283;0.026;0.091;0.591	0.106;0.025;0.037;0.845	FALSE	FALSE	TRUE	3	4	1	chr7	+	26173604-26181002;26173992-26181002;26180910-26181002;26181001-26181002	26173411-26173758;26173888-26173992;26180814-26180910;26180911-26181001;26181002-26181049	(26180911, 26181001)
Cyp2c37	ENSMUST00000049178	ENSMUST00000049178:40096717-40096858:target	0.07783257566062739;-0.2534786196526863;0.14209809640498688	7.645495263174853e-07;0.9814764435834091;0.08549493462656195	0.025;0.975;0.025	0.106;0.725;0.170	TRUE	TRUE	TRUE	3	3	1	chr19	+	39995888-40096717;40000456-40096756;40000479-40096778	39995712-39995888;40000418-40000574;40000418-40000574;40096717-40096858
Ddb2	ENSMUST00000135927	ENSMUST00000135927:91212280-91212325:source	0.2865611269966101;-0.2865611269966086	0.842499063118904;0.842499063118904	0.307;0.693	0.610;0.390	FALSE	FALSE	FALSE	1	2	1	chr2	-	91212325-91212450;91212325-91212326	91212280-91212325;91212326-91212449;91212450-91212614	(91212326, 91212449)
Ddb2	ENSMUST00000028696	ENSMUST00000028696:91212280-91212325:source	0.28285735767822523;-0.28285735767822356	0.8319178150802767;0.8319178150802767	0.309;0.691	0.610;0.390	FALSE	FALSE	FALSE	1	2	1	chr2	-	91212325-91212450;91212325-91212326	91212280-91212325;91212326-91212449;91212450-91212614	(91212326, 91212449)
Ddb2	ENSMUST00000111352	ENSMUST00000111352:91212280-91212325:source	0.28407539296142553;-0.28407539296142387	0.8366490748068791;0.8366490748068791	0.308;0.692	0.609;0.391	FALSE	FALSE	FALSE	1	2	1	chr2	-	91212325-91212450;91212325-91212326	91212280-91212325;91212326-91212449;91212450-91212614	(91212326, 91212449)
Ddb2	ENSMUST00000152277	ENSMUST00000152277:91212280-91212325:source	0.2879738961238972;-0.2879738961238956	0.8468617931335217;0.8468617931335217	0.308;0.692	0.613;0.387	FALSE	FALSE	FALSE	1	2	1	chr2	-	91212325-91212450;91212325-91212326	91212280-91212325;91212326-91212449;91212450-91212614	(91212326, 91212449)
Ddb2	ENSMUST00000150427	ENSMUST00000150427:91212280-91212325:source	0.28711494345625355;-0.28711494345625205	0.8452670562928433;0.8452670562928433	0.308;0.692	0.612;0.388	FALSE	FALSE	FALSE	1	2	1	chr2	-	91212325-91212450;91212325-91212326	91212280-91212325;91212326-91212449;91212450-91212614	(91212326, 91212449)
Dnajb14	ENSMUST00000090178	ENSMUST00000090178:137908345-137916557:target	-0.341647125348168;0.12473161330059164;0.1517988537112525	0.9979618617367005;0.10163867528598183;0.25175585599406164	0.975;0.025;0.025	0.639;0.167;0.194	TRUE	TRUE	TRUE	3	3	1	chr3	+	137906057-137908345;137914042-137914245;137914456-137914722	137905885-137906057;137908345-137916557
Eif4a2	ENSMUST00000144493	ENSMUST00000144493:23111126-23111263:target	-0.24070685526451935;0.2407068552645209	0.8102557255949248;0.8102557255949248	0.763;0.237	0.512;0.488	FALSE	FALSE	FALSE	1	2	1	chr16	+	23110723-23111126;23111125-23111126	23110699-23110723;23110724-23111125;23111126-23111263	(23110724, 23111125)
Erap1	ENSMUST00000169114	ENSMUST00000169114:74646171-74646714:target	-0.236170238970769;0.2361702389707705	0.7407399765946836;0.7407399765946836	0.945;0.055	0.688;0.312	FALSE	FALSE	TRUE	2	3	1	chr13	+	74639893-74646171;74641582-74646171	74639872-74639893;74641572-74641582;74646171-74646714
Etnk1	ENSMUST00000032413	ENSMUST00000032413:143203384-143208546:target	-0.22497162541456173;0.22497162541456328	0.8841610895198214;0.8841610895198214	0.975;0.025	0.749;0.251	FALSE	TRUE	TRUE	2	3	1	chr6	+	143203152-143203384;143207317-143207339	143203079-143203152;143203384-143208546
Fam13b	ENSMUST00000040506	ENSMUST00000040506:34448368-34448451:target	-0.29651871487343856;0.2965187148734401	0.8933002584684766;0.8933002584684766	0.808;0.192	0.501;0.499	FALSE	FALSE	TRUE	2	3	1	chr18	-	34448121-34448368;34445615-34448368	34445532-34445615;34448026-34448121;34448368-34448451
Fga	ENSMUST00000166581	ENSMUST00000166581:83030833-83031979:source	-0.2434897421219376;0.24348974212193922	0.9636513771867836;0.9636513771867836	0.353;0.647	0.114;0.886	FALSE	FALSE	FALSE	1	2	1	chr3	+	83031979-83032701;83031979-83031980	83030833-83031979;83031980-83032700;83032701-83033627	(83031980, 83032700)
Ftcd	ENSMUST00000146344	ENSMUST00000146344:76587301-76587439:target	-0.2362805836574894;0.23628058365749094	0.8222771125385365;0.8222771125385365	0.853;0.147	0.610;0.390	FALSE	FALSE	FALSE	1	2	1	chr10	+	76587176-76587301;76587300-76587301	76587133-76587176;76587177-76587300;76587301-76587439	(76587177, 76587300)
Ftcd	ENSMUST00000146344	ENSMUST00000146344:76587133-76587176:source	-0.2382801752024455;0.23828017520244707	0.8244260950130535;0.8244260950130535	0.817;0.183	0.571;0.429	FALSE	FALSE	FALSE	1	2	1	chr10	+	76587176-76587301;76587176-76587177	76587133-76587176;76587177-76587300;76587301-76587439	(76587177, 76587300)
Gabpb2	ENSMUST00000155555	ENSMUST00000155555:95197438-95200291:source	-0.2683618925450378;0.26836189254503934	0.9555765328154732;0.9555765328154732	0.975;0.025	0.706;0.294	FALSE	TRUE	TRUE	2	3	1	chr3	-	95200291-95203731;95197570-95197594	95197438-95200291;95203731-95204808
Gas5	ENSMUST00000161461	ENSMUST00000161461:161037288-161037315:target	-0.23265465961107623;0.23265465961107776	0.8074856382644743;0.8074856382644743	0.749;0.251	0.508;0.492	FALSE	FALSE	FALSE	1	2	1	chr1	+	161037164-161037288;161037287-161037288	161037124-161037164;161037165-161037287;161037288-161037315	(161037165, 161037287)
Gas5	ENSMUST00000161380	ENSMUST00000161380:161037288-161037315:target	-0.22947118356834922;0.22947118356835072	0.7865561857202323;0.7865561857202323	0.747;0.253	0.509;0.491	FALSE	FALSE	FALSE	1	2	1	chr1	+	161037164-161037288;161037287-161037288	161036820-161037164;161037165-161037287;161037288-161037315	(161037165, 161037287)
Gas5	ENSMUST00000162558	ENSMUST00000162558:161037288-161037315:target	-0.22790894479358834;0.22790894479358986	0.7787452602532788;0.7787452602532788	0.746;0.254	0.509;0.491	FALSE	FALSE	FALSE	1	2	1	chr1	+	161037164-161037288;161037287-161037288	161037124-161037164;161037165-161037287;161037288-161037315	(161037165, 161037287)
Gm47283	ENSMUST00000177591	ENSMUST00000177591:90797834-90797844:source	0.28996154636122057;-0.2899615463612191	0.969408487513972;0.969408487513972	0.025;0.975	0.314;0.686	FALSE	FALSE	FALSE	1	2	1	chrY	+	90797844-90805870;90797844-90797845	90797834-90797844;90797845-90797866;90805870-90805962	(90797845, 90797866)
Gm4951	ENSMUST00000031549	ENSMUST00000031549:60212080-60212169:source	0.17914695372581746;0.07859096296931205;0.002340151474822649;0.010362542627061348;-0.25877959539015266;-0.033616164367245974;-0.05145247344940954	0.4862405528553668;1.4256190199571886e-05;2.6462448051154302e-17;2.7566253998590797e-17;0.9574488610352382;2.7289695891042213e-07;4.143710386127863e-09	0.025;0.044;0.025;0.025;0.746;0.104;0.080	0.205;0.129;0.028;0.038;0.488;0.068;0.028	FALSE	FALSE	TRUE	7	8	1	chr18	+	60212169-60212556;60212169-60216854;60212169-60220830;60212169-60231024;60212169-60245375;60212169-60257719;60212169-60270995	60212080-60212169;60212556-60212664;60216854-60216954;60220830-60220840;60231024-60231110;60245375-60247820;60257719-60257805;60270995-60271057
H3f3b	ENSMUST00000139378	ENSMUST00000139378:116023625-116023778:target	-0.2141819898939634;0.21418198989396503	0.7239485759313697;0.7239485759313697	0.945;0.055	0.720;0.280	FALSE	FALSE	FALSE	1	2	1	chr11	-	116023535-116023625;116023624-116023625	116023509-116023535;116023536-116023624;116023625-116023778	(116023536, 116023624)
H3f3b	ENSMUST00000139378	ENSMUST00000139378:116023509-116023535:source	-0.4045412599670015;0.40454125996700296	0.999949375138753;0.999949375138753	0.885;0.115	0.490;0.510	FALSE	FALSE	FALSE	1	2	1	chr11	-	116023535-116023625;116023535-116023536	116023509-116023535;116023536-116023624;116023625-116023778	(116023536, 116023624)
Hbs1l	ENSMUST00000020153	ENSMUST00000020153:21351927-21352044:target	0.2048287894515423;-0.1169664038150697;-0.058013162054627726	0.7073905823997982;0.04159716435917574;5.149160416589879e-06	0.751;0.163;0.086	0.963;0.035;0.025	FALSE	FALSE	TRUE	3	4	1	chr10	+	21349386-21351927;21350393-21351927;21350468-21351927	21349312-21349386;21350383-21350393;21350458-21350468;21351927-21352044
Herpud1	ENSMUST00000034220	ENSMUST00000034220:94389524-94389595:target	-0.322561398600281;0.3225613986002826	0.9774461082886371;0.9774461082886371	0.721;0.279	0.401;0.599	FALSE	FALSE	FALSE	1	2	1	chr8	+	94389433-94389524;94389523-94389524	94389356-94389433;94389434-94389523;94389524-94389595	(94389434, 94389523)
Hfe2	ENSMUST00000049208	ENSMUST00000049208:96525172-96525330:source	0.4374595321051939;-0.17046217691358925;-0.21755449559338186	0.9999999801599639;0.4242397936357968;0.7111426054035548	0.037;0.401;0.559	0.463;0.210;0.326	FALSE	TRUE	TRUE	3	3	1	chr3	+	96525330-96525983;96525330-96526411;96525330-96526429	96525172-96525330;96525983-96526086;96526411-96526602;96526411-96526602
Hnrnpl	ENSMUST00000173578	ENSMUST00000173578:28817834-28818532:source	-0.21234303967830578;0.21234303967830734	0.7037463988275627;0.7037463988275627	0.912;0.088	0.686;0.314	FALSE	FALSE	FALSE	1	2	1	chr7	+	28818532-28818644;28818532-28818533	28817834-28818532;28818533-28818643;28818644-28818712	(28818533, 28818643)
Hsd17b7	ENSMUST00000027989	ENSMUST00000027989:169949535-169953134:source	-0.3885229741393932;0.3885229741393948	0.9993182520324615;0.9993182520324615	0.937;0.063	0.557;0.443	FALSE	TRUE	TRUE	2	3	1	chr1	-	169953134-169955935;169950191-169950217	169949535-169953134;169955935-169956033
Ifi30	ENSMUST00000034299	ENSMUST00000034299:70764076-70764639:target	0.32457373596175215;-0.32457373596175065	0.9861341442474626;0.9861341442474626	0.394;0.606	0.715;0.285	TRUE	TRUE	FALSE	2	2	1	chr8	-	70763879-70764547;70763879-70764076	70763727-70763879;70763727-70763879;70764076-70764639
Ist1	ENSMUST00000034164	ENSMUST00000034164:109675376-109675424:source	-0.21785295068730265;0.2178529506873042	0.7182117239899658;0.7182117239899658	0.951;0.049	0.717;0.283	FALSE	FALSE	TRUE	2	3	1	chr8	-	109675424-109676758;109675424-109675643	109675376-109675424;109675643-109675653;109676758-109676850
Kidins220	ENSMUST00000066652	ENSMUST00000066652:24989738-24989836:source	-0.2273861070628377;0.2273861070628393	0.7161682352234993;0.7161682352234993	0.424;0.576	0.177;0.823	FALSE	TRUE	FALSE	2	2	1	chr12	+	24989836-24990673;24989836-24990676	24989738-24989836;24990673-24990774;24990673-24990774
mt-Rnr2	ENSMUST00000082390	ENSMUST00000082390:1094-2675:source	0.09492916875763736;0.18315570747216475;-0.29847929585862276;-0.08633819123056553;-0.39842297460056797;0.4974352789122688	0.01402193195925682;0.4966671908409772;0.994224533543236;0.0031100395948153656;0.9998508186009576;0.9999999482564081	0.025;0.147;0.319;0.118;0.414;0.025	0.132;0.353;0.025;0.025;0.025;0.510	TRUE	TRUE	FALSE	6	2	1	chrM	+	1292-1716;1300-1331;1307-1609;1567-1649;1662-1751;1811-1845	1094-2675
Nln	ENSMUST00000109315	ENSMUST00000109315:104036454-104036982:target	-0.2531748315814388;0.2531748315814403	0.8601048776921001;0.8601048776921001	0.856;0.144	0.595;0.405	TRUE	TRUE	FALSE	2	2	1	chr13	-	104035723-104036854;104035723-104036454	104035587-104035723;104035587-104035723;104036454-104036982
Phf20l1	ENSMUST00000048188	ENSMUST00000048188:66623992-66624099:target	-0.1587750107322658;0.21928098208637134;-0.03188401325221312	0.37148835821996656;0.7781594012674883;0.0028862775998045177	0.779;0.027;0.203	0.585;0.254;0.161	FALSE	FALSE	TRUE	2	3	1	chr15	+	66622817-66623992;66623883-66623992;66623991-66623992	66622761-66622817;66623873-66623883;66623884-66623991;66623992-66624099	(66623884, 66623991)
S100pbp	ENSMUST00000106059	ENSMUST00000106059:129181967-129182100:target	0.38049337115505366;-0.3804933711550521	0.9742586169365314;0.9742586169365314	0.156;0.844	0.534;0.466	FALSE	FALSE	FALSE	1	2	1	chr4	-	129181840-129181967;129181966-129181967	129181742-129181840;129181841-129181966;129181967-129182100	(129181841, 129181966)
S100pbp	ENSMUST00000126748	ENSMUST00000126748:129181967-129182100:target	0.41077974770420256;-0.41077974770420106	0.9910548963833992;0.9910548963833992	0.117;0.883	0.521;0.479	FALSE	FALSE	FALSE	1	2	1	chr4	-	129181840-129181967;129181966-129181967	129181742-129181840;129181841-129181966;129181967-129182100	(129181841, 129181966)
S100pbp	ENSMUST00000151971	ENSMUST00000151971:129181967-129182100:target	0.3800020615627395;-0.3800020615627381	0.976328947249114;0.976328947249114	0.157;0.843	0.535;0.465	FALSE	FALSE	FALSE	1	2	1	chr4	-	129181840-129181967;129181966-129181967	129180189-129181840;129181841-129181966;129181967-129182100	(129181841, 129181966)
S100pbp	ENSMUST00000137992	ENSMUST00000137992:129181967-129182532:target	0.3825325758528158;-0.38253257585281447	0.9774311517489952;0.9774311517489952	0.157;0.843	0.537;0.463	FALSE	FALSE	FALSE	1	2	1	chr4	-	129181840-129181967;129181966-129181967	129181742-129181840;129181841-129181966;129181967-129182532	(129181841, 129181966)
S100pbp	ENSMUST00000117497	ENSMUST00000117497:129181967-129182532:target	0.38267712864542763;-0.38267712864542625	0.9773955363574186;0.9773955363574186	0.155;0.845	0.535;0.465	FALSE	FALSE	FALSE	1	2	1	chr4	-	129181840-129181967;129181966-129181967	129181742-129181840;129181841-129181966;129181967-129182532	(129181841, 129181966)
S100pbp	ENSMUST00000117965	ENSMUST00000117965:129181967-129182532:target	0.3869494609985293;-0.3869494609985278	0.9794419579269993;0.9794419579269993	0.155;0.845	0.538;0.462	FALSE	FALSE	FALSE	1	2	1	chr4	-	129181840-129181967;129181966-129181967	129181742-129181840;129181841-129181966;129181967-129182532	(129181841, 129181966)
S100pbp	ENSMUST00000072431	ENSMUST00000072431:129181967-129182100:target	0.38508490811886015;-0.3850849081188588	0.9785883259877742;0.9785883259877742	0.157;0.843	0.538;0.462	FALSE	FALSE	FALSE	1	2	1	chr4	-	129181840-129181967;129181966-129181967	129181742-129181840;129181841-129181966;129181967-129182100	(129181841, 129181966)
Sec23ip	ENSMUST00000042942	ENSMUST00000042942:128778429-128778614:source	0.20661395698887827;-0.2066139569888768	0.6724282023093736;0.6724282023093736	0.745;0.255	0.964;0.036	FALSE	TRUE	FALSE	2	2	1	chr7	+	128778614-128779063;128778614-128779066	128778429-128778614;128779063-128779225;128779063-128779225
Skiv2l	ENSMUST00000046022	ENSMUST00000046022:34839244-34839605:source	-0.23557223240403014;0.2355722324040317	0.8393853907701515;0.8393853907701515	0.957;0.043	0.715;0.285	FALSE	FALSE	FALSE	1	2	1	chr17	-	34839605-34839691;34839605-34839606	34839244-34839605;34839606-34839690;34839691-34839831	(34839606, 34839690)
Skiv2l	ENSMUST00000174887	ENSMUST00000174887:34839249-34839605:source	-0.23199962755732859;0.23199962755733008	0.8215122546362746;0.8215122546362746	0.957;0.043	0.717;0.283	FALSE	FALSE	FALSE	1	2	1	chr17	-	34839605-34839691;34839605-34839606	34839249-34839605;34839606-34839690;34839691-34839831	(34839606, 34839690)
Skiv2l	ENSMUST00000174363	ENSMUST00000174363:34839297-34839605:source	-0.23347204377801015;0.2334720437780117	0.8260208070444911;0.8260208070444911	0.957;0.043	0.716;0.284	FALSE	FALSE	FALSE	1	2	1	chr17	-	34839605-34839691;34839605-34839606	34839297-34839605;34839606-34839690;34839691-34839831	(34839606, 34839690)
Smg1	ENSMUST00000032891	ENSMUST00000032891:118168858-118169002:target	-0.21145247672827575;0.2114524767282773	0.6895066999851126;0.6895066999851126	0.957;0.043	0.730;0.270	FALSE	FALSE	FALSE	1	2	1	chr7	-	118168746-118168858;118168857-118168858	118168608-118168746;118168747-118168857;118168858-118169002	(118168747, 118168857)
Smg1	ENSMUST00000179331	ENSMUST00000179331:118168858-118169002:target	-0.20843846637700017;0.20843846637700172	0.6721383799262997;0.6721383799262997	0.957;0.043	0.733;0.267	FALSE	FALSE	FALSE	1	2	1	chr7	-	118168746-118168858;118168857-118168858	118168608-118168746;118168747-118168857;118168858-118169002	(118168747, 118168857)
Snhg3	ENSMUST00000155816	ENSMUST00000155816:132352122-132352243:source	-0.32611239242246653;0.3261123924224681	0.9829569459069791;0.9829569459069791	0.902;0.098	0.578;0.422	FALSE	FALSE	FALSE	1	2	1	chr4	-	132352243-132352663;132352243-132352244	132352122-132352243;132352244-132352662;132352663-132352698	(132352244, 132352662)
Snhg3	ENSMUST00000155816	ENSMUST00000155816:132352663-132352698:target	-0.30788893957802255;0.3078889395780242	0.9579575022072563;0.9579575022072563	0.803;0.197	0.495;0.505	FALSE	FALSE	FALSE	1	2	1	chr4	-	132352243-132352663;132352662-132352663	132352122-132352243;132352244-132352662;132352663-132352698	(132352244, 132352662)
Snhg3	ENSMUST00000152943	ENSMUST00000152943:132352663-132352698:target	-0.3003086936949873;0.3003086936949889	0.9430847730670708;0.9430847730670708	0.802;0.198	0.499;0.501	FALSE	FALSE	FALSE	1	2	1	chr4	-	132352243-132352663;132352662-132352663	132351933-132352243;132352244-132352662;132352663-132352698	(132352244, 132352662)
Snhg3	ENSMUST00000152943	ENSMUST00000152943:132351933-132352243:source	-0.3289018823708463;0.3289018823708479	0.9858975997808992;0.9858975997808992	0.901;0.099	0.576;0.424	FALSE	FALSE	FALSE	1	2	1	chr4	-	132352243-132352663;132352243-132352244	132351933-132352243;132352244-132352662;132352663-132352698	(132352244, 132352662)
Snhg3	ENSMUST00000141090	ENSMUST00000141090:132352663-132352933:target	-0.3065598775696036;0.30655987756960523	0.9560291287918405;0.9560291287918405	0.803;0.197	0.496;0.504	FALSE	FALSE	FALSE	1	2	1	chr4	-	132352243-132352663;132352662-132352663	132351934-132352243;132352244-132352662;132352663-132352933	(132352244, 132352662)
Snhg3	ENSMUST00000141090	ENSMUST00000141090:132351934-132352243:source	-0.3261867961752544;0.3261867961752561	0.9838159925848478;0.9838159925848478	0.903;0.097	0.580;0.420	FALSE	FALSE	FALSE	1	2	1	chr4	-	132352243-132352663;132352243-132352244	132351934-132352243;132352244-132352662;132352663-132352933	(132352244, 132352662)
Snhg3	ENSMUST00000136127	ENSMUST00000136127:132352663-132352698:target	-0.30208321068412813;0.30208321068412974	0.9516755337119007;0.9516755337119007	0.803;0.197	0.500;0.500	FALSE	FALSE	FALSE	1	2	1	chr4	-	132352243-132352663;132352662-132352663	132352004-132352243;132352244-132352662;132352663-132352698	(132352244, 132352662)
Snhg3	ENSMUST00000136127	ENSMUST00000136127:132352004-132352243:source	-0.32732710592269465;0.3273271059226961	0.9844868832003065;0.9844868832003065	0.900;0.100	0.576;0.424	FALSE	FALSE	FALSE	1	2	1	chr4	-	132352243-132352663;132352243-132352244	132352004-132352243;132352244-132352662;132352663-132352698	(132352244, 132352662)
Sra1	ENSMUST00000001415	ENSMUST00000001415:36678394-36678470:source	-0.3501485909498154;0.35014859094981704	0.997483599217855;0.997483599217855	0.945;0.055	0.601;0.399	FALSE	FALSE	FALSE	1	2	1	chr18	-	36678470-36678550;36678470-36678471	36678394-36678470;36678471-36678549;36678550-36678713	(36678471, 36678549)
Sult2a1	ENSMUST00000108522	ENSMUST00000108522:13797125-13797217:target	0.22837043665170573;-0.2283704366517042	0.789183431470262;0.789183431470262	0.178;0.822	0.416;0.584	FALSE	FALSE	FALSE	1	2	1	chr7	-	13796467-13797125;13797124-13797125	13796246-13796467;13796468-13797124;13797125-13797217	(13796468, 13797124)
Tmem106c	ENSMUST00000064200	ENSMUST00000064200:97964229-97964503:source	0.3259126308299717;-0.32591263082997013	0.9489558550479698;0.9489558550479698	0.589;0.411	0.915;0.085	TRUE	TRUE	FALSE	2	2	1	chr15	+	97964335-97964840;97964503-97964840	97964229-97964503;97964840-97965030;97964840-97965030
Uty	ENSMUST00000154666	ENSMUST00000154666:1137658-1137732:source	-0.22518720022811775;0.22518720022811928	0.6836877886411689;0.6836877886411689	0.903;0.097	0.653;0.347	FALSE	FALSE	FALSE	1	2	1	chrY	-	1137732-1137807;1137732-1137733	1137658-1137732;1137733-1137806;1137807-1137871	(1137733, 1137806)
Uty	ENSMUST00000154004	ENSMUST00000154004:1137658-1137732:source	-0.22640881974513358;0.22640881974513516	0.6889025558970977;0.6889025558970977	0.903;0.097	0.651;0.349	FALSE	FALSE	FALSE	1	2	1	chrY	-	1137732-1137807;1137732-1137733	1137658-1137732;1137733-1137806;1137807-1137871	(1137733, 1137806)
Uty	ENSMUST00000143286	ENSMUST00000143286:1137658-1137732:source	-0.22433141485319055;0.22433141485319208	0.6780947378145503;0.6780947378145503	0.903;0.097	0.653;0.347	FALSE	FALSE	FALSE	1	2	1	chrY	-	1137732-1137807;1137732-1137733	1137658-1137732;1137733-1137806;1137807-1137871	(1137733, 1137806)
Uty	ENSMUST00000139365	ENSMUST00000139365:1137658-1137732:source	-0.22416015969930442;0.22416015969930594	0.6774598830983257;0.6774598830983257	0.902;0.098	0.652;0.348	FALSE	FALSE	FALSE	1	2	1	chrY	-	1137732-1137807;1137732-1137733	1137658-1137732;1137733-1137806;1137807-1137871	(1137733, 1137806)
Uty	ENSMUST00000069309	ENSMUST00000069309:1137658-1137732:source	-0.22820154608172102;0.2282015460817226	0.696231630404457;0.696231630404457	0.904;0.096	0.651;0.349	FALSE	FALSE	FALSE	1	2	1	chrY	-	1137732-1137807;1137732-1137733	1137658-1137732;1137733-1137806;1137807-1137871	(1137733, 1137806)
Vcl	ENSMUST00000022369	ENSMUST00000022369:21028758-21029379:target	-0.24700689661605257;0.2470068966160541	0.797688296925531;0.797688296925531	0.323;0.677	0.065;0.935	FALSE	TRUE	TRUE	2	3	1	chr14	+	21028727-21028758;21024291-21029176	21024106-21024291;21028717-21028727;21028758-21029379
Zzz3	ENSMUST00000106101	ENSMUST00000106101:152449013-152449128:target	-0.2574212243314161;0.2574212243314178	0.8405039048264983;0.8405039048264983	0.912;0.088	0.642;0.358	FALSE	FALSE	FALSE	1	2	1	chr3	+	152448926-152449013;152449012-152449013	152448779-152448926;152448927-152449012;152449013-152449128	(152448927, 152449012)
Zzz3	ENSMUST00000106100	ENSMUST00000106100:152449013-152449128:target	-0.25475244235923683;0.2547524423592383	0.8293236549722595;0.8293236549722595	0.912;0.088	0.644;0.356	FALSE	FALSE	FALSE	1	2	1	chr3	+	152448926-152449013;152449012-152449013	152448779-152448926;152448927-152449012;152449013-152449128	(152448927, 152449012)
Zzz3	ENSMUST00000150802	ENSMUST00000150802:152449013-152449128:target	-0.25480424277788166;0.25480424277788305	0.8343207916021815;0.8343207916021815	0.912;0.088	0.645;0.355	FALSE	FALSE	FALSE	1	2	1	chr3	+	152448926-152449013;152449012-152449013	152448779-152448926;152448927-152449012;152449013-152449128	(152448927, 152449012)
Zzz3	ENSMUST00000106103	ENSMUST00000106103:152449013-152449128:target	-0.2558493021161832;0.2558493021161848	0.8328156571005817;0.8328156571005817	0.912;0.088	0.643;0.357	FALSE	FALSE	FALSE	1	2	1	chr3	+	152448926-152449013;152449012-152449013	152448779-152448926;152448927-152449012;152449013-152449128	(152448927, 152449012)

## Sheet: Cortex-Adarb1 KO-MasterTable
#Gene Name	Transcript ID	LSV ID	E(dPSI) per LSV junction	P(|E(dPSI)|>=0.20) per LSV junction	Cortex Adarb1 WT E(PSI)	Cortex Adarb1 E(PSI)	A5SS	A3SS	ES	Num. Junctions	Num. Exons	De Novo Junctions?	Chr	Strand	Junctions Coordinates	Exons Coordinates	IR Coordinates
Phf7	ENSMUST00000022459	ENSMUST00000022459:31239631-31239737:source	-0.141417823718;-0.0650725174557;0.291093264981	0.349129663968;0.00159335471954;0.944054900768	0.283;0.112;0.604	0.105;0.025;0.891	FALSE	FALSE	TRUE	3	4	1	chr14	-	31239737-31241726;31239737-31240859;31239737-31240274	31239631-31239737;31240274-31240433;31240859-31240983;31241726-31241827
B230217O12Rik	ENSMUST00000181921	ENSMUST00000181921:57360014-57360775:target	0.193310121425;-0.00238609666571;0.0209299320486;-0.226827687176	0.611515534051;5.38385822265e-11;6.24802266018e-09;0.785297965089	0.154;0.042;0.028;0.772	0.355;0.040;0.059;0.543	TRUE	TRUE	TRUE	4	3	1	chr19	-	57324797-57360611;57324793-57360611;57342789-57360014;57324797-57360014	57324596-57324797;57324596-57324797;57324596-57324797;57342695-57342789;57360014-57360775
Arsk	ENSMUST00000120573	ENSMUST00000120573:76060422-76062602:source	0.209638786074;-0.209638786074	0.639661542152;0.639661542152	0.491;0.509	0.732;0.268	FALSE	TRUE	TRUE	2	3	1	chr13	-	76062602-76065280;76062250-76062284	76060422-76062602;76065280-76065504
Gm17586	ENSMUST00000181502	ENSMUST00000181502:120633768-120634492:source	-0.201081612443;0.201081612443	0.665265382313;0.665265382313	0.227;0.773	0.025;0.975	TRUE	TRUE	FALSE	2	2	1	chr11	+	120634454-120634943;120634492-120634943	120633768-120634492;120634943-120635125;120634943-120635125
Hdac5	ENSMUST00000145540	ENSMUST00000145540:102195749-102195894:source	0.201895858362;-0.201895858362	0.670515087064;0.670515087064	0.093;0.907	0.300;0.700	FALSE	FALSE	FALSE	1	2	1	chr11	-	102195894-102195952;102195894-102195895	102195749-102195894;102195895-102195951;102195952-102196322	(102195895, 102195951)
Sat2	ENSMUST00000092969	ENSMUST00000092969:69623491-69623870:target	0.204773664187;-0.204773664187	0.684885040054;0.684885040054	0.531;0.469	0.740;0.260	FALSE	FALSE	FALSE	1	2	1	chr11	+	69623152-69623491;69623490-69623491	69623112-69623152;69623153-69623490;69623491-69623870	(69623153, 69623490)
Kbtbd3	ENSMUST00000049648	ENSMUST00000049648:4316827-4317071:target	-0.207563107394;0.207563107394	0.688736810102;0.688736810102	0.651;0.349	0.436;0.564	FALSE	FALSE	TRUE	2	3	1	chr9	+	4309934-4316827;4313806-4316827	4309743-4310066;4313702-4313806;4316827-4317071
Hirip3	ENSMUST00000037248	ENSMUST00000037248:126864320-126864485:source	0.212617018049;-0.212617018049	0.697687190057;0.697687190057	0.506;0.494	0.732;0.268	FALSE	FALSE	FALSE	1	2	1	chr7	+	126864485-126864563;126864485-126864486	126864320-126864485;126864486-126864562;126864563-126864661	(126864486, 126864562)
Ogdhl	ENSMUST00000022480	ENSMUST00000022480:32325794-32325998:target	0.210904129485;-0.210904129485	0.710889912484;0.710889912484	0.071;0.929	0.286;0.714	FALSE	FALSE	TRUE	2	3	1	chr14	+	32322116-32325794;32323947-32325794	32322019-32322116;32323879-32323947;32325794-32325998
Sobp	ENSMUST00000040275	ENSMUST00000040275:43074593-43074688:target	0.214790460927;-0.214790460927	0.725018444414;0.725018444414	0.666;0.334	0.889;0.111	FALSE	FALSE	TRUE	2	3	1	chr10	-	43022918-43074593;43004414-43074593	43002500-43004414;43020982-43022918;43074593-43074688
Vmn2r29	ENSMUST00000170922	ENSMUST00000170922:7234379-7234502:source	-0.225819611249;0.225819611249	0.72640384875;0.72640384875	0.616;0.384	0.375;0.625	FALSE	FALSE	TRUE	2	3	1	chr7	-	7234502-7267219;7234502-7239980	7234379-7234502;7239980-7240207;7267219-7267305
Rsph3b	ENSMUST00000024572	ENSMUST00000024572:6941669-6941756:target	0.220389161354;-0.220389161354	0.727406373095;0.727406373095	0.394;0.606	0.624;0.376	FALSE	FALSE	TRUE	2	3	1	chr17	-	6921739-6941669;6914098-6941669	6913957-6914098;6921729-6921739;6941669-6941756
Rgl2	ENSMUST00000047503	ENSMUST00000047503:33932321-33932371:source	0.209436656401;-0.209436656401	0.745448429566;0.745448429566	0.749;0.251	0.957;0.043	FALSE	FALSE	FALSE	1	2	1	chr17	+	33932371-33932454;33932371-33932372	33932321-33932371;33932372-33932453;33932454-33932751	(33932372, 33932453)
Sat2	ENSMUST00000108656	ENSMUST00000108656:69623491-69623870:target	0.214857063501;-0.214857063501	0.748754637357;0.748754637357	0.525;0.475	0.741;0.259	FALSE	FALSE	FALSE	1	2	1	chr11	+	69623152-69623491;69623490-69623491	69623112-69623152;69623153-69623490;69623491-69623870	(69623153, 69623490)
Rgl2	ENSMUST00000173258	ENSMUST00000173258:33932321-33932371:source	0.211261768787;-0.211261768787	0.754511433878;0.754511433878	0.747;0.253	0.957;0.043	FALSE	FALSE	FALSE	1	2	1	chr17	+	33932371-33932454;33932371-33932372	33932321-33932371;33932372-33932453;33932454-33932503	(33932372, 33932453)
B230217O12Rik	ENSMUST00000181921	ENSMUST00000181921:57324596-57324797:source	0.217448505074;-0.18531513076;-0.00886665099699;-0.000554189524688	0.755963661354;0.568991651285;2.01486866283e-12;1.76992987528e-10	0.150;0.760;0.041;0.041	0.369;0.561;0.027;0.042	TRUE	TRUE	TRUE	4	3	1	chr19	-	57324797-57360611;57324797-57360014;57324797-57342695;57324793-57360611	57324596-57324797;57342695-57342789;57360014-57360775;57360014-57360775;57360014-57360775
Rnf180	ENSMUST00000069686	ENSMUST00000069686:105270905-105271039:target	0.230118631783;-0.230118631783	0.763531665279;0.763531665279	0.243;0.757	0.481;0.519	FALSE	TRUE	FALSE	2	2	1	chr13	-	105252350-105270905;105252347-105270905	105252252-105252350;105252252-105252350;105270905-105271039
Rgl2	ENSMUST00000173379	ENSMUST00000173379:33932321-33932371:source	0.212399827124;-0.212399827124	0.764969583992;0.764969583992	0.747;0.253	0.957;0.043	FALSE	FALSE	FALSE	1	2	1	chr17	+	33932371-33932454;33932371-33932372	33932321-33932371;33932372-33932453;33932454-33932513	(33932372, 33932453)
Ddx50	ENSMUST00000020270	ENSMUST00000020270:62651025-62651218:target	-0.224912435214;0.224912435214	0.783291839139;0.783291839139	0.320;0.680	0.092;0.908	FALSE	FALSE	TRUE	2	3	1	chr10	-	62647643-62651025;62647201-62651025	62646914-62647201;62647534-62647643;62651025-62651218
Hyi	ENSMUST00000006562	ENSMUST00000006562:118360306-118360337:target	0.243378172715;-0.243378172715	0.808643184368;0.808643184368	0.545;0.455	0.794;0.206	FALSE	FALSE	FALSE	1	2	1	chr4	+	118360231-118360306;118360305-118360306	118360014-118360231;118360232-118360305;118360306-118360337	(118360232, 118360305)
Ogdhl	ENSMUST00000022480	ENSMUST00000022480:32322019-32322116:source	-0.248112451951;0.248112451951	0.820344064894;0.820344064894	0.888;0.112	0.635;0.365	FALSE	FALSE	TRUE	2	3	1	chr14	+	32322116-32323879;32322116-32325794	32322019-32322116;32323879-32323947;32325794-32325998
Hyi	ENSMUST00000194248	ENSMUST00000194248:118360306-118360389:target	0.251388862876;-0.251388862876	0.840084409975;0.840084409975	0.541;0.459	0.796;0.204	FALSE	FALSE	FALSE	1	2	1	chr4	+	118360231-118360306;118360305-118360306	118359990-118360231;118360232-118360305;118360306-118360389	(118360232, 118360305)
1810055G02Rik	ENSMUST00000039048	ENSMUST00000039048:3708333-3708436:source	-0.239009948299;0.239009948299	0.840159081658;0.840159081658	0.913;0.087	0.675;0.325	FALSE	TRUE	FALSE	2	2	1	chr19	+	3708436-3714404;3708436-3714407	3708333-3708436;3714404-3714625;3714404-3714625
Abca8b	ENSMUST00000020948	ENSMUST00000020948:109932190-109934611:source	0.272079699613;-0.0170584079877;-0.234669987404	0.846463325698;0.00449325059359;0.824370229285	0.413;0.306;0.281	0.693;0.259;0.047	TRUE	TRUE	TRUE	3	3	1	chr11	-	109934611-109934723;109933739-109933761;109933097-109933166	109932190-109934611;109934723-109934778
Hook2	ENSMUST00000064495	ENSMUST00000064495:85001155-85001237:source	0.222239109046;-0.222239109046	0.85202763519;0.85202763519	0.746;0.254	0.964;0.036	FALSE	TRUE	FALSE	2	2	1	chr8	+	85001237-85001321;85001237-85001324	85001155-85001237;85001321-85001424;85001321-85001424
Rhobtb3	ENSMUST00000109606	ENSMUST00000109606:75943531-75943925:target	-0.259003933788;0.259003933788	0.86592614138;0.86592614138	0.414;0.586	0.154;0.846	FALSE	FALSE	FALSE	1	2	1	chr13	-	75943432-75943531;75943530-75943531	75943207-75943432;75943433-75943530;75943531-75943925	(75943433, 75943530)
Rhobtb3	ENSMUST00000022078	ENSMUST00000022078:75943531-75943867:target	-0.259974714844;0.259974714844	0.867457692602;0.867457692602	0.413;0.587	0.152;0.848	FALSE	FALSE	FALSE	1	2	1	chr13	-	75943432-75943531;75943530-75943531	75943207-75943432;75943433-75943530;75943531-75943867	(75943433, 75943530)
Plekhg5	ENSMUST00000105662	ENSMUST00000105662:152108403-152108540:target	-0.25481400703;0.25481400703	0.8766370083;0.8766370083	0.884;0.116	0.630;0.370	FALSE	FALSE	FALSE	1	2	1	chr4	+	152108330-152108403;152108402-152108403	152108181-152108330;152108331-152108402;152108403-152108540	(152108331, 152108402)
Sdccag3	ENSMUST00000114100	ENSMUST00000114100:26388916-26389065:source	-0.265794010989;0.265794010989	0.879309772321;0.879309772321	0.406;0.594	0.139;0.861	FALSE	FALSE	FALSE	1	2	1	chr2	-	26389065-26389149;26389065-26389066	26388916-26389065;26389066-26389148;26389149-26389291	(26389066, 26389148)
Plekhg5	ENSMUST00000105661	ENSMUST00000105661:152108403-152108540:target	-0.256452427069;0.256452427069	0.884130577003;0.884130577003	0.886;0.114	0.631;0.369	FALSE	FALSE	FALSE	1	2	1	chr4	+	152108330-152108403;152108402-152108403	152108181-152108330;152108331-152108402;152108403-152108540	(152108331, 152108402)
Sdccag3	ENSMUST00000133737	ENSMUST00000133737:26388916-26389065:source	-0.268873148063;0.268873148063	0.887663943021;0.887663943021	0.409;0.591	0.140;0.860	FALSE	FALSE	FALSE	1	2	1	chr2	-	26389065-26389149;26389065-26389066	26388916-26389065;26389066-26389148;26389149-26389306	(26389066, 26389148)
Plekhg5	ENSMUST00000084115	ENSMUST00000084115:152108403-152108540:target	-0.258378975077;0.258378975077	0.889811454045;0.889811454045	0.886;0.114	0.629;0.371	FALSE	FALSE	FALSE	1	2	1	chr4	+	152108330-152108403;152108402-152108403	152108181-152108330;152108331-152108402;152108403-152108540	(152108331, 152108402)
Sdccag3	ENSMUST00000114102	ENSMUST00000114102:26388916-26389065:source	-0.269462954094;0.269462954094	0.891106150001;0.891106150001	0.408;0.592	0.139;0.861	FALSE	FALSE	FALSE	1	2	1	chr2	-	26389065-26389149;26389065-26389066	26388916-26389065;26389066-26389148;26389149-26389316	(26389066, 26389148)
Plekhg5	ENSMUST00000118648	ENSMUST00000118648:152108403-152108540:target	-0.260443238301;0.260443238301	0.898445451041;0.898445451041	0.886;0.114	0.628;0.372	FALSE	FALSE	FALSE	1	2	1	chr4	+	152108330-152108403;152108402-152108403	152108181-152108330;152108331-152108402;152108403-152108540	(152108331, 152108402)
Nrcam	ENSMUST00000020939	ENSMUST00000020939:44584835-44584987:target	0.282643751249;-0.282643751249	0.900256695133;0.900256695133	0.227;0.773	0.510;0.490	FALSE	FALSE	TRUE	2	3	1	chr12	+	44578180-44584835;44583792-44584835	44578145-44578180;44583667-44583792;44584835-44584987
Slc9a5	ENSMUST00000073149	ENSMUST00000073149:105357394-105357483:source	-0.270515490514;0.270515490514	0.908274936978;0.908274936978	0.881;0.119	0.613;0.387	FALSE	FALSE	TRUE	2	3	1	chr8	+	105357483-105357581;105357483-105358374	105357394-105357483;105357581-105357651;105358374-105358503
Xist	ENSMUST00000127786	ENSMUST00000127786:103460506-103468036:source	0.242768038354;-0.242768038354	0.908848057693;0.908848057693	0.737;0.263	0.975;0.025	FALSE	TRUE	TRUE	2	3	1	chrX	-	103468036-103468818;103467421-103467482	103460506-103468036;103468818-103468972
Ckmt1	ENSMUST00000126130	ENSMUST00000126130:121359945-121360040:target	-0.278429141543;0.278429141543	0.919481725912;0.919481725912	0.870;0.130	0.594;0.406	FALSE	FALSE	FALSE	1	2	1	chr2	+	121359001-121359945;121359944-121359945	121358656-121359001;121359002-121359944;121359945-121360040	(121359002, 121359944)
Josd2	ENSMUST00000133656	ENSMUST00000133656:44468151-44468190:source	-0.28353392003;0.28353392003	0.92667802657;0.92667802657	0.775;0.225	0.495;0.505	FALSE	FALSE	FALSE	1	2	1	chr7	+	44468190-44468306;44468190-44468191	44468151-44468190;44468191-44468305;44468306-44468417	(44468191, 44468305)
Romo1	ENSMUST00000119950	ENSMUST00000119950:156144240-156144280:source	0.277220458774;-0.277220458774	0.927271222129;0.927271222129	0.685;0.315	0.957;0.043	FALSE	FALSE	FALSE	1	2	1	chr2	+	156144280-156144445;156144280-156144281	156144240-156144280;156144281-156144444;156144445-156144589	(156144281, 156144444)
Slc9a5	ENSMUST00000073149	ENSMUST00000073149:105358374-105358503:target	0.29447654185;-0.29447654185	0.931287030669;0.931287030669	0.149;0.851	0.441;0.559	FALSE	FALSE	TRUE	2	3	1	chr8	+	105357483-105358374;105357651-105358374	105357394-105357483;105357581-105357651;105358374-105358503
Arrdc1	ENSMUST00000028349	ENSMUST00000028349:24926272-24926448:target	0.264875345471;-0.264875345471	0.933587425874;0.933587425874	0.600;0.400	0.861;0.139	FALSE	FALSE	FALSE	1	2	1	chr2	-	24926194-24926272;24926271-24926272	24925756-24926194;24926195-24926271;24926272-24926448	(24926195, 24926271)
Arrdc1	ENSMUST00000102935	ENSMUST00000102935:24926272-24926445:target	0.26689969967;-0.266899699669	0.935767551926;0.935767551926	0.600;0.400	0.862;0.138	FALSE	FALSE	FALSE	1	2	1	chr2	-	24926194-24926272;24926271-24926272	24925756-24926194;24926195-24926271;24926272-24926445	(24926195, 24926271)
Fau	ENSMUST00000178310	ENSMUST00000178310:6057888-6058001:source	0.246079518928;-0.246079518928	0.93910177584;0.93910177584	0.633;0.367	0.873;0.127	FALSE	FALSE	FALSE	1	2	1	chr19	+	6058001-6058246;6058001-6058002	6057888-6058001;6058002-6058245;6058246-6058325	(6058002, 6058245)
Rhobtb3	ENSMUST00000022078	ENSMUST00000022078:75943207-75943432:source	-0.290932164893;0.290932164893	0.939678946952;0.939678946952	0.427;0.573	0.140;0.860	FALSE	FALSE	FALSE	1	2	1	chr13	-	75943432-75943531;75943432-75943433	75943207-75943432;75943433-75943530;75943531-75943867	(75943433, 75943530)
Rhobtb3	ENSMUST00000109606	ENSMUST00000109606:75943207-75943432:source	-0.290807842259;0.290807842259	0.943770183738;0.943770183738	0.424;0.576	0.137;0.863	FALSE	FALSE	FALSE	1	2	1	chr13	-	75943432-75943531;75943432-75943433	75943207-75943432;75943433-75943530;75943531-75943925	(75943433, 75943530)
Ccdc65	ENSMUST00000003444	ENSMUST00000003444:98709055-98709222:source	0.328613344238;-0.328613344238	0.955649895123;0.955649895123	0.308;0.692	0.632;0.368	FALSE	FALSE	TRUE	2	3	1	chr15	+	98709222-98710779;98709222-98717424	98709055-98709222;98710779-98710789;98717424-98717593
Tmem136	ENSMUST00000061833	ENSMUST00000061833:43113461-43113660:target	-0.292876899459;0.292876899459	0.962778792133;0.962778792133	0.946;0.054	0.659;0.341	FALSE	TRUE	FALSE	2	2	1	chr9	-	43111858-43113461;43109338-43113461	43108653-43111858;43108653-43111858;43113461-43113660
Gbe1	ENSMUST00000170464	ENSMUST00000170464:70542692-70542702:source	-0.364399147255;0.364399147255	0.963267952012;0.963267952012	0.870;0.130	0.511;0.489	FALSE	FALSE	FALSE	1	2	1	chr16	+	70542702-70547635;70542702-70542703	70542692-70542702;70542703-70542738;70547635-70547645	(70542703, 70542738)
Hnrnpm	ENSMUST00000139302	ENSMUST00000139302:33666494-33666529:source	0.341850143015;-0.341850143015	0.988792208258;0.988792208258	0.466;0.534	0.799;0.201	FALSE	FALSE	FALSE	1	2	1	chr17	-	33666529-33666647;33666529-33666530	33666494-33666529;33666530-33666646;33666647-33666685	(33666530, 33666646)
Hnrnpm	ENSMUST00000087582	ENSMUST00000087582:33666494-33666529:source	0.345828644464;-0.345828644464	0.99497420128;0.99497420128	0.464;0.536	0.801;0.199	FALSE	FALSE	FALSE	1	2	1	chr17	-	33666529-33666647;33666529-33666530	33666494-33666529;33666530-33666646;33666647-33666685	(33666530, 33666646)
Dctn2	ENSMUST00000026479	ENSMUST00000026479:127267414-127267488:source	-0.0271809922453;-0.448152799237;0.505261211672	1.67404203928e-17;1.0;1.0	0.059;0.462;0.482	0.025;0.025;0.975	TRUE	FALSE	TRUE	3	4	1	chr10	+	127267482-127268774;127267482-127270484;127267482-127274714	127267414-127267488;127268774-127268784;127270484-127270492;127274714-127274810
