# Supplementary material for: ADAR-deficiency perturbs the global splicing landscape in mouse tissues
Source: Genome Res. 2020 Aug;30(8):1107–18. doi: 10.1101/gr.256933.119 (PMC7462079; doi:10.1101/gr.256933.119)
Supplement: Supplemental Material [file supp_gr.256933.119_Supplemental_Dataset_S5.xlsx]

## Sheet: Legend
Supplemental_Dataset_S5 - Co-occurrence Analysis of Editing and Splicing in ADAR1 (Adar) and ADAR2 (Adarb1) Mutant Mouse Tissues
		Column Header	Column Description
		Host Gene	Gene harboring the editing site
		Sample	Sample
		Condition/Genotype	Genotype as ADAR1-WT, ADAR1-KO, ADAR2-WT or ADAR2-KO
		Editing Site	Coordinate of editing site
		Splice Site	Coordinate of splice site
		p Value	Co-occurrence p-value
		Multiple testing corrected p value	Multiple testing corrected p value
		Total Read Count	Total number of reads spanning the editing site and splice site
		Editing Levels	editing levels
		Splicing Rate	splicing levels

## Sheet: Non-Significant ES-SS Pairs
Host Gene	Sample	Condition/ Genotype	Editing Site	Splice Site	Multiple testing corrected p-value	Total Read Count	Editing Levels	Splicing Rate
2010001A14Rik	Adar1-WT1	WildType	chr11:57796351	chr11:57796312	1	29	0.0689655	0.965517
	Adar1-WT2	WildType	chr11:57796351	chr11:57796312		23	0.0434783	0.913043
	Adar1-WT3	WildType	chr11:57796351	chr11:57796312		72	0.236111	0.888889
	Adar1-KO1	ADAR1-KO	chr11:57796351	chr11:57796312		6	0	1
	Adar1-KO2	ADAR1-KO	chr11:57796351	chr11:57796312		10	0	1
	Adar1-KO3	ADAR1-KO	chr11:57796351	chr11:57796312		36	0	1
	Adarb1-WT1	WildType	chr11:57796351	chr11:57796312		41	0.097561	0.95122
	Adarb1-WT2	WildType	chr11:57796351	chr11:57796312		37	0.027027	0.918919
	Adarb1-WT3	WildType	chr11:57796351	chr11:57796312		30	0.2	0.933333
	Adarb1-KO1	ADAR2-KO	chr11:57796351	chr11:57796312		36	0.0555556	0.916667
	Adarb1-KO2	ADAR2-KO	chr11:57796351	chr11:57796312		26	0	0.961538
	Adarb1-KO3	ADAR2-KO	chr11:57796351	chr11:57796312		75	0.0533333	0.986667
2010001A14Rik	Adar1-WT1	WildType	chr11:57796351	chr11:57796399	1	22	0.0909091	0.954545
	Adar1-WT2	WildType	chr11:57796351	chr11:57796399		26	0.192308	1
	Adar1-WT3	WildType	chr11:57796351	chr11:57796399		34	0.264706	1
	Adarb1-WT1	WildType	chr11:57796351	chr11:57796399		15	0.2	0.933333
	Adarb1-WT2	WildType	chr11:57796351	chr11:57796399		34	0.176471	0.941176
	Adarb1-WT3	WildType	chr11:57796351	chr11:57796399		24	0.291667	0.875
	Adarb1-KO1	ADAR2-KO	chr11:57796351	chr11:57796399		27	0.0740741	0.888889
	Adarb1-KO2	ADAR2-KO	chr11:57796351	chr11:57796399		19	0	1
	Adarb1-KO3	ADAR2-KO	chr11:57796351	chr11:57796399		42	0	1
	Adar1-KO1	ADAR1-KO	chr11:57796351	chr11:57796399		7	0.142857	1
	Adar1-KO2	ADAR1-KO	chr11:57796351	chr11:57796399		13	0.153846	1
	Adar1-KO3	ADAR1-KO	chr11:57796351	chr11:57796399		25	0	0.8
Adarb1	Adar1-WT1	WildType	chr10:77322603	chr10:77322632	1	28	0.0357143	0.535714
	Adar1-WT2	WildType	chr10:77322603	chr10:77322632		31	0	0.935484
	Adar1-WT3	WildType	chr10:77322603	chr10:77322632		26	0	0.846154
	Adar1-KO1	ADAR1-KO	chr10:77322603	chr10:77322632		10	0	0.6
	Adar1-KO2	ADAR1-KO	chr10:77322603	chr10:77322632		37	0	1
	Adar1-KO3	ADAR1-KO	chr10:77322603	chr10:77322632		18	0	0.722222
	Adarb1-WT1	WildType	chr10:77322603	chr10:77322632		49	0.0612245	0.877551
	Adarb1-WT2	WildType	chr10:77322603	chr10:77322632		25	0	0.92
	Adarb1-WT3	WildType	chr10:77322603	chr10:77322632		15	0.133333	0.8
	Adarb1-KO1	ADAR2-KO	chr10:77322603	chr10:77322632		3	0	0
	Adarb1-KO2	ADAR2-KO	chr10:77322603	chr10:77322632		1	0	0
Cacna1d	Adar1-WT1	WildType	chr14:30066121	chr14:30066166	1	4	0.5	1
	Adar1-WT2	WildType	chr14:30066121	chr14:30066166		11	0.363636	1
	Adar1-WT3	WildType	chr14:30066121	chr14:30066166		10	0.3	0.9
	Adar1-KO1	ADAR1-KO	chr14:30066121	chr14:30066166		15	0.133333	1
	Adar1-KO2	ADAR1-KO	chr14:30066121	chr14:30066166		51	0.313725	0.960784
	Adar1-KO3	ADAR1-KO	chr14:30066121	chr14:30066166		13	0.615385	1
	Adarb1-WT1	WildType	chr14:30066121	chr14:30066166		13	0.384615	1
	Adarb1-WT2	WildType	chr14:30066121	chr14:30066166		12	0.416667	1
	Adarb1-WT3	WildType	chr14:30066121	chr14:30066166		9	0.111111	0.888889
	Adarb1-KO1	ADAR2-KO	chr14:30066121	chr14:30066166		10	0.1	1
	Adarb1-KO2	ADAR2-KO	chr14:30066121	chr14:30066166		8	0	1
	Adarb1-KO3	ADAR2-KO	chr14:30066121	chr14:30066166		6	0	1
Copa	Adar1-WT1	WildType	chr1:172092348	chr1:172092356	1	230	0.0434783	0.995652
	Adar1-WT2	WildType	chr1:172092348	chr1:172092356		282	0.0460993	1
	Adar1-WT3	WildType	chr1:172092348	chr1:172092356		520	0.0653846	0.992308
	Adar1-KO1	ADAR1-KO	chr1:172092348	chr1:172092356		371	0.0215633	0.997305
	Adar1-KO2	ADAR1-KO	chr1:172092348	chr1:172092356		1032	0.0668605	0.996124
	Adar1-KO3	ADAR1-KO	chr1:172092348	chr1:172092356		205	0.0341463	1
	Adarb1-WT1	WildType	chr1:172092348	chr1:172092356		336	0.127976	0.985119
	Adarb1-WT2	WildType	chr1:172092348	chr1:172092356		236	0.0932203	0.983051
	Adarb1-WT3	WildType	chr1:172092348	chr1:172092356		186	0.0698925	0.994624
	Adarb1-KO1	ADAR2-KO	chr1:172092348	chr1:172092356		277	0	0.99639
	Adarb1-KO2	ADAR2-KO	chr1:172092348	chr1:172092356		150	0.0133333	1
	Adarb1-KO3	ADAR2-KO	chr1:172092348	chr1:172092356		27	0	1
Cyhr1	Adar1-WT1	WildType	chr15:76659979	chr15:76659955	1	132	0.0151515	0.424242
	Adar1-WT2	WildType	chr15:76659979	chr15:76659955		149	0.00671141	0.369128
	Adar1-WT3	WildType	chr15:76659979	chr15:76659955		133	0.0150376	0.37594
	Adar1-KO1	ADAR1-KO	chr15:76659979	chr15:76659955		176	0	0.392045
	Adar1-KO2	ADAR1-KO	chr15:76659979	chr15:76659955		194	0	0.417526
	Adar1-KO3	ADAR1-KO	chr15:76659979	chr15:76659955		177	0	0.446328
	Adarb1-WT1	WildType	chr15:76659979	chr15:76659955		209	0	0.488038
	Adarb1-WT2	WildType	chr15:76659979	chr15:76659955		141	0.0141844	0.475177
	Adarb1-WT3	WildType	chr15:76659979	chr15:76659955		85	0	0.423529
	Adarb1-KO1	ADAR2-KO	chr15:76659979	chr15:76659955		232	0.00862069	0.413793
	Adarb1-KO2	ADAR2-KO	chr15:76659979	chr15:76659955		90	0	0.488889
	Adarb1-KO3	ADAR2-KO	chr15:76659979	chr15:76659955		96	0	0.666667
Dgkz	Adar1-WT1	WildType	chr2:91936773	chr2:91936773	1	177	0	0
	Adar1-WT2	WildType	chr2:91936773	chr2:91936773		207	0.0193237	0
	Adar1-WT3	WildType	chr2:91936773	chr2:91936773		495	0.0020202	0
	Adar1-KO1	ADAR1-KO	chr2:91936773	chr2:91936773		305	0	0
	Adar1-KO2	ADAR1-KO	chr2:91936773	chr2:91936773		669	0.00597907	0
	Adar1-KO3	ADAR1-KO	chr2:91936773	chr2:91936773		263	0.00380228	0
	Adarb1-WT1	WildType	chr2:91936773	chr2:91936773		181	0	0
	Adarb1-WT2	WildType	chr2:91936773	chr2:91936773		152	0.0131579	0
	Adarb1-WT3	WildType	chr2:91936773	chr2:91936773		142	0.00704225	0
	Adarb1-KO1	ADAR2-KO	chr2:91936773	chr2:91936773		229	0.00873362	0
	Adarb1-KO2	ADAR2-KO	chr2:91936773	chr2:91936773		109	0.00917431	0
	Adarb1-KO3	ADAR2-KO	chr2:91936773	chr2:91936773		64	0	0
Dusp11	Adar1-WT1	WildType	chr6:85955364	chr6:85955402	1	11	0.454545	0.818182
	Adar1-WT2	WildType	chr6:85955364	chr6:85955402		23	0.173913	0.826087
	Adar1-WT3	WildType	chr6:85955364	chr6:85955402		28	0.25	0.642857
	Adar1-KO1	ADAR1-KO	chr6:85955364	chr6:85955402		12	0.166667	0.5
	Adar1-KO2	ADAR1-KO	chr6:85955364	chr6:85955402		1	0	1
	Adar1-KO3	ADAR1-KO	chr6:85955364	chr6:85955402		16	0.0625	0.9375
	Adarb1-WT1	WildType	chr6:85955364	chr6:85955402		31	0.258065	0.806452
	Adarb1-WT2	WildType	chr6:85955364	chr6:85955402		44	0.159091	0.840909
	Adarb1-WT3	WildType	chr6:85955364	chr6:85955402		29	0.206897	0.689655
	Adarb1-KO1	ADAR2-KO	chr6:85955364	chr6:85955402		38	0.0526316	0.815789
	Adarb1-KO2	ADAR2-KO	chr6:85955364	chr6:85955402		27	0.148148	0.814815
	Adarb1-KO3	ADAR2-KO	chr6:85955364	chr6:85955402		3	0	1
Dusp11	Adar1-WT1	WildType	chr6:85955365	chr6:85955402	1	12	0.416667	0.833333
	Adar1-WT2	WildType	chr6:85955365	chr6:85955402		23	0.130435	0.826087
	Adar1-WT3	WildType	chr6:85955365	chr6:85955402		28	0.214286	0.642857
	Adar1-KO1	ADAR1-KO	chr6:85955365	chr6:85955402		13	0.0769231	0.538462
	Adar1-KO2	ADAR1-KO	chr6:85955365	chr6:85955402		1	0	1
	Adar1-KO3	ADAR1-KO	chr6:85955365	chr6:85955402		16	0.125	0.9375
	Adarb1-WT1	WildType	chr6:85955365	chr6:85955402		32	0.25	0.8125
	Adarb1-WT2	WildType	chr6:85955365	chr6:85955402		47	0.12766	0.851064
	Adarb1-WT3	WildType	chr6:85955365	chr6:85955402		29	0.241379	0.689655
	Adarb1-KO1	ADAR2-KO	chr6:85955365	chr6:85955402		38	0.105263	0.815789
	Adarb1-KO2	ADAR2-KO	chr6:85955365	chr6:85955402		26	0.0769231	0.846154
	Adarb1-KO3	ADAR2-KO	chr6:85955365	chr6:85955402		3	0	1
Dusp11	Adar1-WT1	WildType	chr6:85955369	chr6:85955402	1	12	0.5	0.833333
	Adar1-WT2	WildType	chr6:85955369	chr6:85955402		23	0.0869565	0.826087
	Adar1-WT3	WildType	chr6:85955369	chr6:85955402		32	0.125	0.6875
	Adar1-KO1	ADAR1-KO	chr6:85955369	chr6:85955402		13	0	0.538462
	Adar1-KO2	ADAR1-KO	chr6:85955369	chr6:85955402		2	0	1
	Adar1-KO3	ADAR1-KO	chr6:85955369	chr6:85955402		16	0.0625	0.9375
	Adarb1-WT1	WildType	chr6:85955369	chr6:85955402		32	0.09375	0.8125
	Adarb1-WT2	WildType	chr6:85955369	chr6:85955402		50	0.16	0.84
	Adarb1-WT3	WildType	chr6:85955369	chr6:85955402		31	0.322581	0.709677
	Adarb1-KO1	ADAR2-KO	chr6:85955369	chr6:85955402		39	0.282051	0.820513
	Adarb1-KO2	ADAR2-KO	chr6:85955369	chr6:85955402		27	0.259259	0.814815
	Adarb1-KO3	ADAR2-KO	chr6:85955369	chr6:85955402		3	0	1
Dusp11	Adar1-WT1	WildType	chr6:85955370	chr6:85955402	1	12	0.5	0.833333
	Adar1-WT2	WildType	chr6:85955370	chr6:85955402		23	0.217391	0.826087
	Adar1-WT3	WildType	chr6:85955370	chr6:85955402		32	0.3125	0.6875
	Adar1-KO1	ADAR1-KO	chr6:85955370	chr6:85955402		14	0.0714286	0.571429
	Adar1-KO2	ADAR1-KO	chr6:85955370	chr6:85955402		2	0	1
	Adar1-KO3	ADAR1-KO	chr6:85955370	chr6:85955402		16	0.0625	0.9375
	Adarb1-WT1	WildType	chr6:85955370	chr6:85955402		32	0.21875	0.8125
	Adarb1-WT2	WildType	chr6:85955370	chr6:85955402		51	0.0980392	0.843137
	Adarb1-WT3	WildType	chr6:85955370	chr6:85955402		31	0.225806	0.709677
	Adarb1-KO1	ADAR2-KO	chr6:85955370	chr6:85955402		39	0.358974	0.820513
	Adarb1-KO2	ADAR2-KO	chr6:85955370	chr6:85955402		27	0.037037	0.777778
	Adarb1-KO3	ADAR2-KO	chr6:85955370	chr6:85955402		3	0	1
Dusp11	Adar1-WT1	WildType	chr6:85955371	chr6:85955402	1	12	0.416667	0.833333
	Adar1-WT2	WildType	chr6:85955371	chr6:85955402		23	0.478261	0.826087
	Adar1-WT3	WildType	chr6:85955371	chr6:85955402		31	0.419355	0.677419
	Adar1-KO1	ADAR1-KO	chr6:85955371	chr6:85955402		15	0.0666667	0.6
	Adar1-KO2	ADAR1-KO	chr6:85955371	chr6:85955402		2	0	1
	Adar1-KO3	ADAR1-KO	chr6:85955371	chr6:85955402		16	0.3125	0.9375
	Adarb1-WT1	WildType	chr6:85955371	chr6:85955402		32	0.4375	0.8125
	Adarb1-WT2	WildType	chr6:85955371	chr6:85955402		51	0.254902	0.843137
	Adarb1-WT3	WildType	chr6:85955371	chr6:85955402		32	0.53125	0.71875
	Adarb1-KO1	ADAR2-KO	chr6:85955371	chr6:85955402		39	0.410256	0.820513
	Adarb1-KO2	ADAR2-KO	chr6:85955371	chr6:85955402		28	0.5	0.785714
	Adarb1-KO3	ADAR2-KO	chr6:85955371	chr6:85955402		3	1	1
Ecsit	Adar1-WT1	WildType	chr9:22084070	chr9:22084023	1	133	0.0150376	0.917293
	Adar1-WT2	WildType	chr9:22084070	chr9:22084023		148	0.0202703	0.966216
	Adar1-WT3	WildType	chr9:22084070	chr9:22084023		181	0.0220994	0.933702
	Adar1-KO1	ADAR1-KO	chr9:22084070	chr9:22084023		192	0.015625	0.895833
	Adar1-KO2	ADAR1-KO	chr9:22084070	chr9:22084023		224	0.00446429	0.852679
	Adar1-KO3	ADAR1-KO	chr9:22084070	chr9:22084023		171	0.0233918	0.912281
	Adarb1-WT1	WildType	chr9:22084070	chr9:22084023		166	0.0361446	0.951807
	Adarb1-WT2	WildType	chr9:22084070	chr9:22084023		176	0.0170455	0.948864
	Adarb1-WT3	WildType	chr9:22084070	chr9:22084023		141	0.035461	0.914894
	Adarb1-KO1	ADAR2-KO	chr9:22084070	chr9:22084023		216	0.00462963	0.912037
	Adarb1-KO2	ADAR2-KO	chr9:22084070	chr9:22084023		87	0	0.896552
	Adarb1-KO3	ADAR2-KO	chr9:22084070	chr9:22084023		53	0	0.90566
Eloc	Adar1-WT1	WildType	chr1:16646834	chr1:16646789	1	16	0.0625	0.25
	Adar1-WT2	WildType	chr1:16646834	chr1:16646789		17	0.0588235	0.235294
	Adar1-WT3	WildType	chr1:16646834	chr1:16646789		20	0.35	0.7
	Adar1-KO1	ADAR1-KO	chr1:16646834	chr1:16646789		14	0	0.357143
	Adar1-KO2	ADAR1-KO	chr1:16646834	chr1:16646789		16	0	0.625
	Adar1-KO3	ADAR1-KO	chr1:16646834	chr1:16646789		10	0	0.7
	Adarb1-WT1	WildType	chr1:16646834	chr1:16646789		17	0.0588235	0.588235
	Adarb1-WT2	WildType	chr1:16646834	chr1:16646789		27	0.037037	0.444444
	Adarb1-WT3	WildType	chr1:16646834	chr1:16646789		24	0.125	0.416667
	Adarb1-KO1	ADAR2-KO	chr1:16646834	chr1:16646789		22	0.0454545	0.363636
	Adarb1-KO2	ADAR2-KO	chr1:16646834	chr1:16646789		18	0	0.277778
	Adarb1-KO3	ADAR2-KO	chr1:16646834	chr1:16646789		33	0.0909091	0.636364
Eloc	Adar1-WT1	WildType	chr1:16646836	chr1:16646789	1	15	0.0666667	0.266667
	Adar1-WT2	WildType	chr1:16646836	chr1:16646789		17	0.411765	0.235294
	Adar1-WT3	WildType	chr1:16646836	chr1:16646789		20	0.3	0.7
	Adar1-KO1	ADAR1-KO	chr1:16646836	chr1:16646789		14	0	0.357143
	Adar1-KO2	ADAR1-KO	chr1:16646836	chr1:16646789		16	0	0.625
	Adar1-KO3	ADAR1-KO	chr1:16646836	chr1:16646789		10	0	0.7
	Adarb1-WT1	WildType	chr1:16646836	chr1:16646789		16	0.0625	0.5625
	Adarb1-WT2	WildType	chr1:16646836	chr1:16646789		26	0.230769	0.423077
	Adarb1-WT3	WildType	chr1:16646836	chr1:16646789		24	0.25	0.416667
	Adarb1-KO1	ADAR2-KO	chr1:16646836	chr1:16646789		21	0.380952	0.333333
	Adarb1-KO2	ADAR2-KO	chr1:16646836	chr1:16646789		17	0.176471	0.235294
	Adarb1-KO3	ADAR2-KO	chr1:16646836	chr1:16646789		32	0.65625	0.625
Fastk	Adar1-WT1	WildType	chr5:24444637	chr5:24444587	1	29	0	0.310345
	Adar1-WT2	WildType	chr5:24444637	chr5:24444587		23	0	0.0434783
	Adar1-WT3	WildType	chr5:24444637	chr5:24444587		49	0.102041	0.142857
	Adar1-KO1	ADAR1-KO	chr5:24444637	chr5:24444587		40	0.05	0.275
	Adar1-KO2	ADAR1-KO	chr5:24444637	chr5:24444587		78	0.0641026	0.358974
	Adar1-KO3	ADAR1-KO	chr5:24444637	chr5:24444587		38	0.184211	0.263158
	Adarb1-WT1	WildType	chr5:24444637	chr5:24444587		49	0.142857	0.265306
	Adarb1-WT2	WildType	chr5:24444637	chr5:24444587		68	0.0147059	0.205882
	Adarb1-WT3	WildType	chr5:24444637	chr5:24444587		44	0.0681818	0.204545
	Adarb1-KO1	ADAR2-KO	chr5:24444637	chr5:24444587		54	0	0.0740741
	Adarb1-KO2	ADAR2-KO	chr5:24444637	chr5:24444587		28	0.0357143	0.107143
	Adarb1-KO3	ADAR2-KO	chr5:24444637	chr5:24444587		6	0	0.166667
Flna	Adar1-WT1	WildType	chrX:74226869	chrX:74226861	0.9	107	0.0654206	0.551402
	Adar1-WT2	WildType	chrX:74226869	chrX:74226861		172	0.0813953	0.406977
	Adar1-WT3	WildType	chrX:74226869	chrX:74226861		100	0.01	0.51
	Adar1-KO1	ADAR1-KO	chrX:74226869	chrX:74226861		150	0	0.293333
	Adar1-KO2	ADAR1-KO	chrX:74226869	chrX:74226861		278	0.00719424	0.323741
	Adar1-KO3	ADAR1-KO	chrX:74226869	chrX:74226861		119	0.0252101	0.504202
	Adarb1-WT1	WildType	chrX:74226869	chrX:74226861		119	0.0252101	0.537815
	Adarb1-WT2	WildType	chrX:74226869	chrX:74226861		101	0.019802	0.544554
	Adarb1-WT3	WildType	chrX:74226869	chrX:74226861		104	0.0769231	0.394231
	Adarb1-KO1	ADAR2-KO	chrX:74226869	chrX:74226861		123	0	0.829268
	Adarb1-KO2	ADAR2-KO	chrX:74226869	chrX:74226861		60	0	0.85
	Adarb1-KO3	ADAR2-KO	chrX:74226869	chrX:74226861		45	0	0.888889
Gnas	Adar1-WT1	WildType	chr2:174327901	chr2:174327943	1	104	0.105769	1
	Adar1-WT2	WildType	chr2:174327901	chr2:174327943		93	0.0967742	0.989247
	Adar1-WT3	WildType	chr2:174327901	chr2:174327943		201	0.159204	0.960199
	Adar1-KO1	ADAR1-KO	chr2:174327901	chr2:174327943		159	0.0377358	0.949686
	Adar1-KO2	ADAR1-KO	chr2:174327901	chr2:174327943		239	0.0251046	0.987448
	Adar1-KO3	ADAR1-KO	chr2:174327901	chr2:174327943		164	0.0182927	0.987805
	Adarb1-WT1	WildType	chr2:174327901	chr2:174327943		219	0.136986	0.949772
	Adarb1-WT2	WildType	chr2:174327901	chr2:174327943		168	0.196429	0.994048
	Adarb1-WT3	WildType	chr2:174327901	chr2:174327943		122	0.122951	0.97541
	Adarb1-KO1	ADAR2-KO	chr2:174327901	chr2:174327943		213	0.107981	0.957746
	Adarb1-KO2	ADAR2-KO	chr2:174327901	chr2:174327943		128	0.0859375	0.976562
	Adarb1-KO3	ADAR2-KO	chr2:174327901	chr2:174327943		63	0.142857	1
Grik2	Adar1-WT1	WildType	chr10:49244334	chr10:49244325	1	105	0.00952381	0.933333
	Adar1-WT2	WildType	chr10:49244334	chr10:49244325		103	0.0291262	0.92233
	Adar1-WT3	WildType	chr10:49244334	chr10:49244325		151	0.013245	0.960265
	Adar1-KO1	ADAR1-KO	chr10:49244334	chr10:49244325		121	0.0165289	0.884298
	Adar1-KO2	ADAR1-KO	chr10:49244334	chr10:49244325		164	0.109756	0.865854
	Adar1-KO3	ADAR1-KO	chr10:49244334	chr10:49244325		95	0.0631579	0.915789
	Adarb1-WT1	WildType	chr10:49244334	chr10:49244325		105	0.0190476	0.857143
	Adarb1-WT2	WildType	chr10:49244334	chr10:49244325		122	0.0409836	0.885246
	Adarb1-WT3	WildType	chr10:49244334	chr10:49244325		60	0	0.9
	Adarb1-KO1	ADAR2-KO	chr10:49244334	chr10:49244325		113	0	0.920354
	Adarb1-KO2	ADAR2-KO	chr10:49244334	chr10:49244325		72	0	0.902778
	Adarb1-KO3	ADAR2-KO	chr10:49244334	chr10:49244325		43	0	0.953488
Grik2	Adar1-WT1	WildType	chr10:49244347	chr10:49244325	1	90	0.0555556	0.922222
	Adar1-WT2	WildType	chr10:49244347	chr10:49244325		88	0.0113636	0.920455
	Adar1-WT3	WildType	chr10:49244347	chr10:49244325		120	0.00833333	0.958333
	Adar1-KO1	ADAR1-KO	chr10:49244347	chr10:49244325		105	0	0.866667
	Adar1-KO2	ADAR1-KO	chr10:49244347	chr10:49244325		149	0	0.85906
	Adar1-KO3	ADAR1-KO	chr10:49244347	chr10:49244325		73	0	0.90411
	Adarb1-WT1	WildType	chr10:49244347	chr10:49244325		89	0.0224719	0.831461
	Adarb1-WT2	WildType	chr10:49244347	chr10:49244325		105	0.00952381	0.87619
	Adarb1-WT3	WildType	chr10:49244347	chr10:49244325		49	0.0204082	0.877551
	Adarb1-KO1	ADAR2-KO	chr10:49244347	chr10:49244325		90	0.0555556	0.922222
	Adarb1-KO2	ADAR2-KO	chr10:49244347	chr10:49244325		63	0.142857	0.888889
	Adarb1-KO3	ADAR2-KO	chr10:49244347	chr10:49244325		35	0.0571429	0.971429
Hs3st4	Adar1-WT1	WildType	chr7:123983362	chr7:123983325	1	64	0.015625	0.140625
	Adar1-WT2	WildType	chr7:123983362	chr7:123983325		84	0.0714286	0.22619
	Adar1-WT3	WildType	chr7:123983362	chr7:123983325		177	0.0734463	0.118644
	Adar1-KO1	ADAR1-KO	chr7:123983362	chr7:123983325		115	0	0.191304
	Adar1-KO2	ADAR1-KO	chr7:123983362	chr7:123983325		227	0.0440529	0.101322
	Adar1-KO3	ADAR1-KO	chr7:123983362	chr7:123983325		108	0.0740741	0.222222
	Adarb1-WT1	WildType	chr7:123983362	chr7:123983325		87	0.0229885	0.195402
	Adarb1-WT2	WildType	chr7:123983362	chr7:123983325		100	0.09	0.26
	Adarb1-WT3	WildType	chr7:123983362	chr7:123983325		61	0.147541	0.262295
	Adarb1-KO1	ADAR2-KO	chr7:123983362	chr7:123983325		149	0.00671141	0.228188
	Adarb1-KO2	ADAR2-KO	chr7:123983362	chr7:123983325		83	0	0.277108
	Adarb1-KO3	ADAR2-KO	chr7:123983362	chr7:123983325		42	0.047619	0.571429
Man2c1	Adar1-WT1	WildType	chr9:57134161	chr9:57134133	0.59	19	0	0.263158
	Adar1-WT2	WildType	chr9:57134161	chr9:57134133		35	0	0.0571429
	Adar1-WT3	WildType	chr9:57134161	chr9:57134133		29	0.0344828	0.344828
	Adar1-KO1	ADAR1-KO	chr9:57134161	chr9:57134133		21	0.047619	0.333333
	Adar1-KO2	ADAR1-KO	chr9:57134161	chr9:57134133		54	0.148148	0.259259
	Adar1-KO3	ADAR1-KO	chr9:57134161	chr9:57134133		12	0.0833333	0.416667
	Adarb1-WT1	WildType	chr9:57134161	chr9:57134133		23	0.304348	0.434783
	Adarb1-WT2	WildType	chr9:57134161	chr9:57134133		29	0	0.517241
	Adarb1-WT3	WildType	chr9:57134161	chr9:57134133		20	0.05	0.5
	Adarb1-KO1	ADAR2-KO	chr9:57134161	chr9:57134133		31	0.129032	0.290323
	Adarb1-KO2	ADAR2-KO	chr9:57134161	chr9:57134133		19	0	0.105263
	Adarb1-KO3	ADAR2-KO	chr9:57134161	chr9:57134133		7	0.428571	0.857143
Mcts1	Adar1-WT1	WildType	chrX:38608839	chrX:38608870	0.9	30	0	0.333333
	Adar1-WT2	WildType	chrX:38608839	chrX:38608870		25	0.12	0.52
	Adar1-WT3	WildType	chrX:38608839	chrX:38608870		17	0.0588235	0.352941
	Adar1-KO1	ADAR1-KO	chrX:38608839	chrX:38608870		21	0.0952381	0.333333
	Adar1-KO2	ADAR1-KO	chrX:38608839	chrX:38608870		39	0.102564	0.282051
	Adar1-KO3	ADAR1-KO	chrX:38608839	chrX:38608870		40	0.25	0.5
	Adarb1-WT1	WildType	chrX:38608839	chrX:38608870		33	0.212121	0.393939
	Adarb1-WT2	WildType	chrX:38608839	chrX:38608870		62	0.16129	0.322581
	Adarb1-WT3	WildType	chrX:38608839	chrX:38608870		24	0.125	0.125
	Adarb1-KO1	ADAR2-KO	chrX:38608839	chrX:38608870		36	0	0.416667
	Adarb1-KO2	ADAR2-KO	chrX:38608839	chrX:38608870		26	0	0.192308
	Adarb1-KO3	ADAR2-KO	chrX:38608839	chrX:38608870		32	0	0.78125
Mfn1	Adar1-WT1	WildType	chr3:32561478	chr3:32561465	1	192	0.0208333	0.75
	Adar1-WT2	WildType	chr3:32561478	chr3:32561465		236	0.0127119	0.788136
	Adar1-WT3	WildType	chr3:32561478	chr3:32561465		252	0.0119048	0.825397
	Adar1-KO1	ADAR1-KO	chr3:32561478	chr3:32561465		209	0.0287081	0.837321
	Adar1-KO2	ADAR1-KO	chr3:32561478	chr3:32561465		176	0.0454545	0.75
	Adar1-KO3	ADAR1-KO	chr3:32561478	chr3:32561465		257	0.00389105	0.879377
	Adarb1-WT1	WildType	chr3:32561478	chr3:32561465		137	0.0583942	0.89781
	Adarb1-WT2	WildType	chr3:32561478	chr3:32561465		188	0	0.819149
	Adarb1-WT3	WildType	chr3:32561478	chr3:32561465		130	0.0153846	0.8
	Adarb1-KO1	ADAR2-KO	chr3:32561478	chr3:32561465		215	0.0186047	0.92093
	Adarb1-KO2	ADAR2-KO	chr3:32561478	chr3:32561465		128	0	0.859375
	Adarb1-KO3	ADAR2-KO	chr3:32561478	chr3:32561465		57	0	0.894737
Mfn1	Adar1-WT1	WildType	chr3:32561485	chr3:32561465	1	180	0.0611111	0.744444
	Adar1-WT2	WildType	chr3:32561485	chr3:32561465		223	0.0358744	0.784753
	Adar1-WT3	WildType	chr3:32561485	chr3:32561465		237	0.0379747	0.818565
	Adar1-KO1	ADAR1-KO	chr3:32561485	chr3:32561465		198	0.10101	0.828283
	Adar1-KO2	ADAR1-KO	chr3:32561485	chr3:32561465		158	0.14557	0.740506
	Adar1-KO3	ADAR1-KO	chr3:32561485	chr3:32561465		232	0.137931	0.862069
	Adarb1-WT1	WildType	chr3:32561485	chr3:32561465		134	0.0597015	0.88806
	Adarb1-WT2	WildType	chr3:32561485	chr3:32561465		178	0.0449438	0.825843
	Adarb1-WT3	WildType	chr3:32561485	chr3:32561465		124	0.129032	0.790323
	Adarb1-KO1	ADAR2-KO	chr3:32561485	chr3:32561465		202	0.0148515	0.910891
	Adarb1-KO2	ADAR2-KO	chr3:32561485	chr3:32561465		123	0	0.853659
	Adarb1-KO3	ADAR2-KO	chr3:32561485	chr3:32561465		52	0	0.884615
Mfn1	Adar1-WT1	WildType	chr3:32561490	chr3:32561465	1	179	0	0.748603
	Adar1-WT2	WildType	chr3:32561490	chr3:32561465		221	0.0135747	0.782805
	Adar1-WT3	WildType	chr3:32561490	chr3:32561465		236	0	0.817797
	Adar1-KO1	ADAR1-KO	chr3:32561490	chr3:32561465		196	0.0204082	0.831633
	Adar1-KO2	ADAR1-KO	chr3:32561490	chr3:32561465		155	0	0.735484
	Adar1-KO3	ADAR1-KO	chr3:32561490	chr3:32561465		221	0	0.868778
	Adarb1-WT1	WildType	chr3:32561490	chr3:32561465		131	0.00763359	0.885496
	Adarb1-WT2	WildType	chr3:32561490	chr3:32561465		174	0	0.821839
	Adarb1-WT3	WildType	chr3:32561490	chr3:32561465		123	0.0162602	0.796748
	Adarb1-KO1	ADAR2-KO	chr3:32561490	chr3:32561465		196	0	0.908163
	Adarb1-KO2	ADAR2-KO	chr3:32561490	chr3:32561465		119	0	0.848739
	Adarb1-KO3	ADAR2-KO	chr3:32561490	chr3:32561465		50	0	0.88
Neil1	Adar1-WT1	WildType	chr9:57144308	chr9:57144316	1	26	0.0384615	0.692308
	Adar1-WT2	WildType	chr9:57144308	chr9:57144316		43	0.0465116	0.674419
	Adar1-WT3	WildType	chr9:57144308	chr9:57144316		48	0.0833333	0.9375
	Adar1-KO1	ADAR1-KO	chr9:57144308	chr9:57144316		63	0	0.809524
	Adar1-KO2	ADAR1-KO	chr9:57144308	chr9:57144316		93	0	0.88172
	Adar1-KO3	ADAR1-KO	chr9:57144308	chr9:57144316		45	0	0.844444
	Adarb1-WT1	WildType	chr9:57144308	chr9:57144316		46	0.108696	0.76087
	Adarb1-WT2	WildType	chr9:57144308	chr9:57144316		63	0.15873	0.904762
	Adarb1-WT3	WildType	chr9:57144308	chr9:57144316		47	0.170213	0.744681
	Adarb1-KO1	ADAR2-KO	chr9:57144308	chr9:57144316		30	0.0333333	0.766667
	Adarb1-KO2	ADAR2-KO	chr9:57144308	chr9:57144316		22	0.0454545	0.863636
	Adarb1-KO3	ADAR2-KO	chr9:57144308	chr9:57144316		36	0	0.694444
none	Adar1-WT1	WildType	chr10:88372135	chr10:88372097	1	5	0.2	1
	Adar1-WT2	WildType	chr10:88372135	chr10:88372097		6	0.166667	0.5
	Adar1-WT3	WildType	chr10:88372135	chr10:88372097		18	0.666667	0.888889
	Adar1-KO1	ADAR1-KO	chr10:88372135	chr10:88372097		14	0.428571	0.857143
	Adar1-KO2	ADAR1-KO	chr10:88372135	chr10:88372097		24	0.458333	0.75
	Adar1-KO3	ADAR1-KO	chr10:88372135	chr10:88372097		12	0.583333	0.833333
	Adarb1-WT1	WildType	chr10:88372135	chr10:88372097		10	0.7	1
	Adarb1-WT2	WildType	chr10:88372135	chr10:88372097		14	0.285714	0.928571
	Adarb1-WT3	WildType	chr10:88372135	chr10:88372097		3	0.666667	0.666667
	Adarb1-KO1	ADAR2-KO	chr10:88372135	chr10:88372097		8	0	1
	Adarb1-KO2	ADAR2-KO	chr10:88372135	chr10:88372097		10	0.4	0.9
	Adarb1-KO3	ADAR2-KO	chr10:88372135	chr10:88372097		7	0	0.714286
Nup214	Adar1-WT1	WildType	chr2:32047432	chr2:32047403	1	54	0.0740741	0.685185
	Adar1-WT2	WildType	chr2:32047432	chr2:32047403		76	0.0921053	0.736842
	Adar1-WT3	WildType	chr2:32047432	chr2:32047403		87	0.149425	0.793103
	Adar1-KO1	ADAR1-KO	chr2:32047432	chr2:32047403		59	0	0.762712
	Adar1-KO2	ADAR1-KO	chr2:32047432	chr2:32047403		110	0.0181818	0.672727
	Adar1-KO3	ADAR1-KO	chr2:32047432	chr2:32047403		75	0.0666667	0.733333
	Adarb1-WT1	WildType	chr2:32047432	chr2:32047403		49	0.0612245	0.530612
	Adarb1-WT2	WildType	chr2:32047432	chr2:32047403		55	0.0909091	0.545455
	Adarb1-WT3	WildType	chr2:32047432	chr2:32047403		38	0.0263158	0.578947
	Adarb1-KO1	ADAR2-KO	chr2:32047432	chr2:32047403		59	0	0.627119
	Adarb1-KO2	ADAR2-KO	chr2:32047432	chr2:32047403		27	0	0.777778
	Adarb1-KO3	ADAR2-KO	chr2:32047432	chr2:32047403		44	0	0.727273
Pcmt1	Adar1-WT1	WildType	chr10:7648514	chr10:7648467	1	16	0.125	1
	Adar1-WT2	WildType	chr10:7648514	chr10:7648467		9	0.444444	1
	Adar1-WT3	WildType	chr10:7648514	chr10:7648467		23	0.173913	1
	Adar1-KO1	ADAR1-KO	chr10:7648514	chr10:7648467		17	0	1
	Adar1-KO2	ADAR1-KO	chr10:7648514	chr10:7648467		21	0	0.904762
	Adar1-KO3	ADAR1-KO	chr10:7648514	chr10:7648467		12	0	1
	Adarb1-WT1	WildType	chr10:7648514	chr10:7648467		29	0.310345	1
	Adarb1-WT2	WildType	chr10:7648514	chr10:7648467		14	0.142857	1
	Adarb1-WT3	WildType	chr10:7648514	chr10:7648467		4	0.25	0.75
	Adarb1-KO1	ADAR2-KO	chr10:7648514	chr10:7648467		17	0.235294	1
	Adarb1-KO2	ADAR2-KO	chr10:7648514	chr10:7648467		13	0.230769	1
	Adarb1-KO3	ADAR2-KO	chr10:7648514	chr10:7648467		10	0	0.9
Phka2	Adar1-WT1	WildType	chrX:160577990	chrX:160577948	1	18	0.166667	0.888889
	Adar1-WT2	WildType	chrX:160577990	chrX:160577948		32	0.09375	0.96875
	Adar1-WT3	WildType	chrX:160577990	chrX:160577948		25	0.08	0.96
	Adar1-KO1	ADAR1-KO	chrX:160577990	chrX:160577948		33	0	0.818182
	Adar1-KO2	ADAR1-KO	chrX:160577990	chrX:160577948		48	0	0.916667
	Adar1-KO3	ADAR1-KO	chrX:160577990	chrX:160577948		19	0	1
	Adarb1-WT1	WildType	chrX:160577990	chrX:160577948		19	0.157895	0.842105
	Adarb1-WT2	WildType	chrX:160577990	chrX:160577948		17	0.0588235	1
	Adarb1-WT3	WildType	chrX:160577990	chrX:160577948		30	0.0666667	0.833333
	Adarb1-KO1	ADAR2-KO	chrX:160577990	chrX:160577948		18	0.166667	1
	Adarb1-KO2	ADAR2-KO	chrX:160577990	chrX:160577948		15	0.0666667	0.933333
	Adarb1-KO3	ADAR2-KO	chrX:160577990	chrX:160577948		5	0	1
Shank1	Adar1-WT1	WildType	chr7:44343672	chr7:44343658	0.48	204	0	0.965686
	Adar1-WT2	WildType	chr7:44343672	chr7:44343658		178	0.0337079	0.97191
	Adar1-WT3	WildType	chr7:44343672	chr7:44343658		268	0.0447761	0.992537
	Adar1-KO1	ADAR1-KO	chr7:44343672	chr7:44343658		261	0	0.996169
	Adar1-KO2	ADAR1-KO	chr7:44343672	chr7:44343658		378	0.0132275	0.981481
	Adar1-KO3	ADAR1-KO	chr7:44343672	chr7:44343658		190	0	0.989474
	Adarb1-WT1	WildType	chr7:44343672	chr7:44343658		304	0.0131579	0.990132
	Adarb1-WT2	WildType	chr7:44343672	chr7:44343658		242	0	0.987603
	Adarb1-WT3	WildType	chr7:44343672	chr7:44343658		123	0.0243902	1
	Adarb1-KO1	ADAR2-KO	chr7:44343672	chr7:44343658		331	0	0.993958
	Adarb1-KO2	ADAR2-KO	chr7:44343672	chr7:44343658		110	0.0636364	1
	Adarb1-KO3	ADAR2-KO	chr7:44343672	chr7:44343658		8	0	1
Timm9	Adar1-WT1	WildType	chr12:71133971	chr12:71133999	1	21	0.047619	0.761905
	Adar1-WT2	WildType	chr12:71133971	chr12:71133999		19	0	0.631579
	Adar1-WT3	WildType	chr12:71133971	chr12:71133999		29	0.206897	0.62069
	Adar1-KO1	ADAR1-KO	chr12:71133971	chr12:71133999		14	0	0.357143
	Adar1-KO2	ADAR1-KO	chr12:71133971	chr12:71133999		19	0	0.315789
	Adar1-KO3	ADAR1-KO	chr12:71133971	chr12:71133999		24	0	0.708333
	Adarb1-WT1	WildType	chr12:71133971	chr12:71133999		54	0.0925926	0.759259
	Adarb1-WT2	WildType	chr12:71133971	chr12:71133999		40	0.125	0.725
	Adarb1-WT3	WildType	chr12:71133971	chr12:71133999		36	0.0277778	0.472222
	Adarb1-KO1	ADAR2-KO	chr12:71133971	chr12:71133999		32	0.09375	0.75
	Adarb1-KO2	ADAR2-KO	chr12:71133971	chr12:71133999		21	0.047619	0.666667
	Adarb1-KO3	ADAR2-KO	chr12:71133971	chr12:71133999		35	0	0.828571
Trappc2l	Adar1-WT1	WildType	chr8:122614171	chr8:122614160	0.43	79	0.0506329	0.35443
	Adar1-WT2	WildType	chr8:122614171	chr8:122614160		88	0.0454545	0.306818
	Adar1-WT3	WildType	chr8:122614171	chr8:122614160		166	0.0301205	0.301205
	Adar1-KO1	ADAR1-KO	chr8:122614171	chr8:122614160		70	0.0142857	0.342857
	Adar1-KO2	ADAR1-KO	chr8:122614171	chr8:122614160		234	0	0.217949
	Adar1-KO3	ADAR1-KO	chr8:122614171	chr8:122614160		81	0	0.037037
	Adarb1-WT1	WildType	chr8:122614171	chr8:122614160		154	0.0519481	0.428571
	Adarb1-WT2	WildType	chr8:122614171	chr8:122614160		189	0.037037	0.280423
	Adarb1-WT3	WildType	chr8:122614171	chr8:122614160		164	0.054878	0.469512
	Adarb1-KO1	ADAR2-KO	chr8:122614171	chr8:122614160		135	0.0296296	0.22963
	Adarb1-KO2	ADAR2-KO	chr8:122614171	chr8:122614160		110	0.0545455	0.281818
	Adarb1-KO3	ADAR2-KO	chr8:122614171	chr8:122614160		289	0.0207612	0.550173

## Sheet: Significiant ES-SS Pairs
Host Gene	Sample	Condition/ Genotype	Editing Site	Splice Site	Multiple testing corrected p-value	Total Read Count	Editing Levels	Splicing Rate
B9d1	Adar1-WT1	WildType	chr11:61511148	chr11:61511143	~ 0	10	0.4	0.4
	Adar1-WT2	WildType	chr11:61511148	chr11:61511143		6	0.333333	0
	Adar1-WT3	WildType	chr11:61511148	chr11:61511143		14	0.571429	0.0714286
	Adar1-KO1	ADAR1-KO	chr11:61511148	chr11:61511143		25	0.28	0.28
	Adar1-KO2	ADAR1-KO	chr11:61511148	chr11:61511143		30	0.4	0.7
	Adar1-KO3	ADAR1-KO	chr11:61511148	chr11:61511143		11	0.636364	0.636364
	Adarb1-WT1	WildType	chr11:61511148	chr11:61511143		26	0.692308	0.538462
	Adarb1-WT2	WildType	chr11:61511148	chr11:61511143		26	0.692308	0.461538
	Adarb1-WT3	WildType	chr11:61511148	chr11:61511143		11	0.636364	0.0909091
	Adarb1-KO1	ADAR2-KO	chr11:61511148	chr11:61511143		24	0.708333	0.5
	Adarb1-KO2	ADAR2-KO	chr11:61511148	chr11:61511143		17	0.764706	0.647059
	Adarb1-KO3	ADAR2-KO	chr11:61511148	chr11:61511143		22	0.818182	0.818182
Sypl	Adar1-WT1	WildType	chr12:32967747	chr12:32967755	~ 0	8	0.75	0.75
	Adar1-WT2	WildType	chr12:32967747	chr12:32967755		30	0.933333	0.933333
	Adar1-WT3	WildType	chr12:32967747	chr12:32967755		32	0.96875	0.96875
	Adar1-KO1	ADAR1-KO	chr12:32967747	chr12:32967755		46	0.913043	0.913043
	Adar1-KO2	ADAR1-KO	chr12:32967747	chr12:32967755		8	0.375	0.375
	Adar1-KO3	ADAR1-KO	chr12:32967747	chr12:32967755		3	0.666667	0.666667
	Adarb1-WT1	WildType	chr12:32967747	chr12:32967755		41	0.97561	0.97561
	Adarb1-WT2	WildType	chr12:32967747	chr12:32967755		117	0.957265	0.957265
	Adarb1-WT3	WildType	chr12:32967747	chr12:32967755		5	0.8	0.8
	Adarb1-KO1	ADAR2-KO	chr12:32967747	chr12:32967755		4	0.25	0.25
	Adarb1-KO2	ADAR2-KO	chr12:32967747	chr12:32967755		47	0.957447	0.957447
	Adarb1-KO3	ADAR2-KO	chr12:32967747	chr12:32967755		6	0.833333	0.833333
Flnb	Adar1-WT1	WildType	chr14:7936048	chr14:7936051	~ 0	23	0.304348	0.73913
	Adar1-WT2	WildType	chr14:7936048	chr14:7936051		27	0.407407	0.666667
	Adar1-WT3	WildType	chr14:7936048	chr14:7936051		51	0.431373	0.843137
	Adar1-KO1	ADAR1-KO	chr14:7936048	chr14:7936051		9	0.555556	0.555556
	Adar1-KO2	ADAR1-KO	chr14:7936048	chr14:7936051		45	0.488889	0.733333
	Adar1-KO3	ADAR1-KO	chr14:7936048	chr14:7936051		15	0.466667	0.533333
	Adarb1-WT1	WildType	chr14:7936048	chr14:7936051		21	0.619048	0.571429
	Adarb1-WT2	WildType	chr14:7936048	chr14:7936051		31	0.451613	0.741935
	Adarb1-WT3	WildType	chr14:7936048	chr14:7936051		23	0.521739	0.73913
	Adarb1-KO1	ADAR2-KO	chr14:7936048	chr14:7936051		29	0	0.965517
	Adarb1-KO2	ADAR2-KO	chr14:7936048	chr14:7936051		12	0	0.916667
	Adarb1-KO3	ADAR2-KO	chr14:7936048	chr14:7936051		8	0	0.875
C1qtnf4	Adar1-WT1	WildType	chr2:90888668	chr2:90888717	~ 0.1	29	0.344828	0.344828
	Adar1-WT2	WildType	chr2:90888668	chr2:90888717		60	0.35	0.25
	Adar1-WT3	WildType	chr2:90888668	chr2:90888717		30	0.366667	0.466667
	Adar1-KO1	ADAR1-KO	chr2:90888668	chr2:90888717		42	0	0.333333
	Adar1-KO2	ADAR1-KO	chr2:90888668	chr2:90888717		44	0.0454545	0.0454545
	Adar1-KO3	ADAR1-KO	chr2:90888668	chr2:90888717		45	0.0222222	0.4
	Adarb1-WT1	WildType	chr2:90888668	chr2:90888717		40	0.325	0.225
	Adarb1-WT2	WildType	chr2:90888668	chr2:90888717		69	0.275362	0.0724638
	Adarb1-WT3	WildType	chr2:90888668	chr2:90888717		24	0.166667	0.125
	Adarb1-KO1	ADAR2-KO	chr2:90888668	chr2:90888717		41	0.268293	0.243902
	Adarb1-KO2	ADAR2-KO	chr2:90888668	chr2:90888717		30	0.366667	0.1
	Adarb1-KO3	ADAR2-KO	chr2:90888668	chr2:90888717		26	0.384615	0.423077
none	Adar1-WT1	WildType	chr2:90919749	chr2:90919756	~ 0	7	0	0
	Adar1-WT2	WildType	chr2:90919749	chr2:90919756		7	0	0
	Adar1-WT3	WildType	chr2:90919749	chr2:90919756		59	0.457627	0.40678
	Adar1-KO1	ADAR1-KO	chr2:90919749	chr2:90919756		13	0	0
	Adar1-KO2	ADAR1-KO	chr2:90919749	chr2:90919756		19	0	0
	Adar1-KO3	ADAR1-KO	chr2:90919749	chr2:90919756		42	0.5	0.428571
	Adarb1-WT1	WildType	chr2:90919749	chr2:90919756		74	0.364865	0.175676
	Adarb1-WT2	WildType	chr2:90919749	chr2:90919756		87	0.425287	0.183908
	Adarb1-WT3	WildType	chr2:90919749	chr2:90919756		116	0.5	0.396552
	Adarb1-KO1	ADAR2-KO	chr2:90919749	chr2:90919756		90	0.5	0.411111
	Adarb1-KO2	ADAR2-KO	chr2:90919749	chr2:90919756		77	0.675325	0.545455
	Adarb1-KO3	ADAR2-KO	chr2:90919749	chr2:90919756		66	0.651515	0.606061
none	Adar1-WT1	WildType	chr2:90919749	chr2:90919786	~ 0	4	0	0
	Adar1-WT2	WildType	chr2:90919749	chr2:90919786		5	0	0
	Adar1-WT3	WildType	chr2:90919749	chr2:90919786		41	0.560976	0.585366
	Adar1-KO1	ADAR1-KO	chr2:90919749	chr2:90919786		9	0	0
	Adar1-KO2	ADAR1-KO	chr2:90919749	chr2:90919786		17	0	0
	Adar1-KO3	ADAR1-KO	chr2:90919749	chr2:90919786		32	0.5625	0.5625
	Adarb1-WT1	WildType	chr2:90919749	chr2:90919786		40	0.325	0.325
	Adarb1-WT2	WildType	chr2:90919749	chr2:90919786		56	0.303571	0.285714
	Adarb1-WT3	WildType	chr2:90919749	chr2:90919786		78	0.602564	0.589744
	Adarb1-KO1	ADAR2-KO	chr2:90919749	chr2:90919786		55	0.672727	0.672727
	Adarb1-KO2	ADAR2-KO	chr2:90919749	chr2:90919786		55	0.763636	0.763636
	Adarb1-KO3	ADAR2-KO	chr2:90919749	chr2:90919786		55	0.727273	0.727273
Dgkz	Adar1-WT1	WildType	chr2:91936773	chr2:91936776	~ 0	172	0	0.976744
	Adar1-WT2	WildType	chr2:91936773	chr2:91936776		202	0.019802	0.915842
	Adar1-WT3	WildType	chr2:91936773	chr2:91936776		483	0.00207039	0.977226
	Adar1-KO1	ADAR1-KO	chr2:91936773	chr2:91936776		295	0	0.949153
	Adar1-KO2	ADAR1-KO	chr2:91936773	chr2:91936776		658	0.00607903	0.940729
	Adar1-KO3	ADAR1-KO	chr2:91936773	chr2:91936776		253	0.00395257	0.948617
	Adarb1-WT1	WildType	chr2:91936773	chr2:91936776		180	0	0.972222
	Adarb1-WT2	WildType	chr2:91936773	chr2:91936776		146	0.0136986	0.965753
	Adarb1-WT3	WildType	chr2:91936773	chr2:91936776		139	0.00719424	0.942446
	Adarb1-KO1	ADAR2-KO	chr2:91936773	chr2:91936776		223	0.00896861	0.973094
	Adarb1-KO2	ADAR2-KO	chr2:91936773	chr2:91936776		106	0.00943396	0.95283
	Adarb1-KO3	ADAR2-KO	chr2:91936773	chr2:91936776		62	0	0.983871
Mfn1	Adar1-WT1	WildType	chr3:32561471	chr3:32561465	~ 0	205	0.0926829	0.746341
	Adar1-WT2	WildType	chr3:32561471	chr3:32561465		244	0.196721	0.782787
	Adar1-WT3	WildType	chr3:32561471	chr3:32561465		259	0.0965251	0.822394
	Adar1-KO1	ADAR1-KO	chr3:32561471	chr3:32561465		225	0.146667	0.844444
	Adar1-KO2	ADAR1-KO	chr3:32561471	chr3:32561465		187	0.229947	0.759358
	Adar1-KO3	ADAR1-KO	chr3:32561471	chr3:32561465		269	0.185874	0.877323
	Adarb1-WT1	WildType	chr3:32561471	chr3:32561465		141	0.134752	0.886525
	Adarb1-WT2	WildType	chr3:32561471	chr3:32561465		199	0.145729	0.824121
	Adarb1-WT3	WildType	chr3:32561471	chr3:32561465		137	0.131387	0.788321
	Adarb1-KO1	ADAR2-KO	chr3:32561471	chr3:32561465		228	0	0.916667
	Adarb1-KO2	ADAR2-KO	chr3:32561471	chr3:32561465		132	0	0.856061
	Adarb1-KO3	ADAR2-KO	chr3:32561471	chr3:32561465		61	0	0.885246
Selenot	Adar1-WT1	WildType	chr3:58590700	chr3:58590695	~ 0	529	0.00567108	0.969754
	Adar1-WT2	WildType	chr3:58590700	chr3:58590695		519	0.0327553	0.990366
	Adar1-WT3	WildType	chr3:58590700	chr3:58590695		578	0.0415225	0.991349
	Adar1-KO1	ADAR1-KO	chr3:58590700	chr3:58590695		464	0.0258621	0.982759
	Adar1-KO2	ADAR1-KO	chr3:58590700	chr3:58590695		767	0.029987	0.954368
	Adar1-KO3	ADAR1-KO	chr3:58590700	chr3:58590695		434	0.0414747	0.993088
	Adarb1-WT1	WildType	chr3:58590700	chr3:58590695		372	0.0376344	0.991935
	Adarb1-WT2	WildType	chr3:58590700	chr3:58590695		358	0.0502793	0.977654
	Adarb1-WT3	WildType	chr3:58590700	chr3:58590695		277	0.032491	0.99278
	Adarb1-KO1	ADAR2-KO	chr3:58590700	chr3:58590695		247	0.00404858	0.975709
	Adarb1-KO2	ADAR2-KO	chr3:58590700	chr3:58590695		195	0.0102564	0.979487
	Adarb1-KO3	ADAR2-KO	chr3:58590700	chr3:58590695		175	0.0114286	0.994286
Gria2	Adar1-WT1	WildType	chr3:80692286	chr3:80692285	~ 0	365	0.438356	0.947945
	Adar1-WT2	WildType	chr3:80692286	chr3:80692285		405	0.62716	0.891358
	Adar1-WT3	WildType	chr3:80692286	chr3:80692285		428	0.60514	0.964953
	Adar1-KO1	ADAR1-KO	chr3:80692286	chr3:80692285		480	0.48125	0.883333
	Adar1-KO2	ADAR1-KO	chr3:80692286	chr3:80692285		887	0.64938	0.916573
	Adar1-KO3	ADAR1-KO	chr3:80692286	chr3:80692285		322	0.677019	0.92236
	Adarb1-WT1	WildType	chr3:80692286	chr3:80692285		194	0.721649	0.93299
	Adarb1-WT2	WildType	chr3:80692286	chr3:80692285		350	0.682857	0.865714
	Adarb1-WT3	WildType	chr3:80692286	chr3:80692285		328	0.719512	0.862805
	Adarb1-KO1	ADAR2-KO	chr3:80692286	chr3:80692285		201	0.149254	0.925373
	Adarb1-KO2	ADAR2-KO	chr3:80692286	chr3:80692285		209	0.133971	0.92823
	Adarb1-KO3	ADAR2-KO	chr3:80692286	chr3:80692285		160	0.05	0.9
1600020E01Rik	Adar1-WT1	WildType	chr6:86527227	chr6:86527233	~ 0	46	0.23913	0.23913
	Adar1-WT2	WildType	chr6:86527227	chr6:86527233		59	0.305085	0.305085
	Adar1-WT3	WildType	chr6:86527227	chr6:86527233		48	0.395833	0.395833
	Adar1-KO1	ADAR1-KO	chr6:86527227	chr6:86527233		60	0.433333	0.433333
	Adar1-KO2	ADAR1-KO	chr6:86527227	chr6:86527233		80	0.3625	0.3625
	Adar1-KO3	ADAR1-KO	chr6:86527227	chr6:86527233		54	0.444444	0.444444
	Adarb1-WT1	WildType	chr6:86527227	chr6:86527233		102	0.323529	0.323529
	Adarb1-WT2	WildType	chr6:86527227	chr6:86527233		106	0.358491	0.358491
	Adarb1-WT3	WildType	chr6:86527227	chr6:86527233		54	0.351852	0.351852
	Adarb1-KO1	ADAR2-KO	chr6:86527227	chr6:86527233		81	0.308642	0.308642
	Adarb1-KO2	ADAR2-KO	chr6:86527227	chr6:86527233		50	0.34	0.34
	Adarb1-KO3	ADAR2-KO	chr6:86527227	chr6:86527233		47	0.553191	0.553191
Flna	Adar1-WT1	WildType	chrX:74226862	chrX:74226861	~ 0	111	0.441441	0.540541
	Adar1-WT2	WildType	chrX:74226862	chrX:74226861		183	0.57377	0.398907
	Adar1-WT3	WildType	chrX:74226862	chrX:74226861		102	0.578431	0.5
	Adar1-KO1	ADAR1-KO	chrX:74226862	chrX:74226861		157	0.713376	0.292994
	Adar1-KO2	ADAR1-KO	chrX:74226862	chrX:74226861		313	0.731629	0.322684
	Adar1-KO3	ADAR1-KO	chrX:74226862	chrX:74226861		139	0.582734	0.496403
	Adarb1-WT1	WildType	chrX:74226862	chrX:74226861		121	0.553719	0.528926
	Adarb1-WT2	WildType	chrX:74226862	chrX:74226861		103	0.456311	0.533981
	Adarb1-WT3	WildType	chrX:74226862	chrX:74226861		109	0.697248	0.376147
	Adarb1-KO1	ADAR2-KO	chrX:74226862	chrX:74226861		128	0.015625	0.835938
	Adarb1-KO2	ADAR2-KO	chrX:74226862	chrX:74226861		65	0	0.830769
	Adarb1-KO3	ADAR2-KO	chrX:74226862	chrX:74226861		50	0	0.86
