# Supplementary material for: ADAR-deficiency perturbs the global splicing landscape in mouse tissues
Source: Genome Res. 2020 Aug;30(8):1107–18. doi: 10.1101/gr.256933.119 (PMC7462079; doi:10.1101/gr.256933.119)
Supplement: Supplemental Material [file supp_gr.256933.119_Supplemental_Dataset_S6.xlsx]

## Sheet: Legend
Supplemental_Dataset_S6: Analysis of expression changes in circular RNAs and linear counterparts in wildtype and Adar ko tissues
Column description:
Gene		gene name
CircCoordinates		coordinates of the circular RNA
CircLength		length of the circular RNA
BM		bone marrow
WT		wildtype
KO		knockout
Circ		circular RNA
FDR		estimated false discovery rate
AveExpr		average expression
p-value		t-test to test for statistically significant differences between wildtype and knockout

## Sheet: Bone Marrow-Circ vs Linear
			Circ Counts							||	Linear Counts							||	Circ Statistics					||	Linear Statistics
Gene	CircCoordinates	CircLength	BM-WT1-C	BM-WT2-C	BM-WT3-C	|	BM-KO1-C	BM-KO2-C	BM-KO3-C	||	BM-WT1-L	BM-WT2-L	BM-WT3-L	|	BM-KO1-L	BM-KO2-L	BM-KO3-L	||	WT-Circ	KO-Circ	FDR	AveExpr	P value	||	WT-Linear	KO-Linear	FDR	AveExpr	P value
Ezh2	6:47576536-47577667	1131	122	34	73	|	26	10	4	||	139	166	159	|	76	54	113	||	0	-2.22895	2.85408e-05	11.4509	1.56474e-08	||	0	-0.832735	0.235704	11.4509	0.0109704
Ikzf1	11:11700205-11707904	7699	99	33	31	|	25	2	5	||	359	373	414	|	229	153	310	||	0	-2.07713	0.00135131	11.4044	1.4817e-06	||	0	-0.629133	0.547851	11.4044	0.0619604
Ezh2	6:47576563-47577667	1104	42	9	17	|	9	3	1	||	218	226	221	|	117	77	164	||	0	-2.02932	0.0140971	10.2149	2.3186e-05	||	0	-0.800373	0.132893	10.2149	0.00393433
Dennd4a	9:64835954-64873139	37185	0	0	0	|	0	6	5	||	228	425	387	|	210	305	526	||	0	9.23854	0.0186691	10.4308	4.09409e-05	||	0	0.111574	0.961696	10.4308	0.750321
Phf21a	2:92214049-92230724	16675	23	3	10	|	4	1	1	||	55	52	49	|	31	25	36	||	0	-2.2219	0.0553782	8.44649	0.000182974	||	0	-0.638458	0.372774	8.44649	0.0237071
Senp1	15:98084970-98087133	2163	40	16	11	|	8	6	2	||	77	74	79	|	73	42	88	||	0	-1.69827	0.0553782	9.56798	0.000204196	||	0	-0.0772398	0.967734	9.56798	0.788937
Tlk1	2:70770004-70786995	16991	88	23	19	|	24	4	2	||	205	141	139	|	104	112	169	||	0	-1.81124	0.0553782	10.7518	0.000212526	||	0	-0.256915	0.944221	10.7518	0.519985
Cnot6l	5:96128943-96134132	5189	22	11	9	|	8	1	0	||	64	76	72	|	38	52	44	||	0	-1.93855	0.0636334	8.92011	0.000319659	||	0	-0.50003	0.608845	8.92011	0.078544
Cnot4	6:35077981-35080226	2245	22	14	7	|	7	0	2	||	67	113	63	|	41	55	70	||	0	-1.97658	0.0636334	9.07965	0.000334492	||	0	-0.412168	0.765604	9.07965	0.168315
Plbd1	6:136634431-136641214	6783	4	4	4	|	0	0	0	||	328	210	275	|	208	88	256	||	0	-8.95986	0.0636334	9.94681	0.000348867	||	0	-0.503738	0.773269	9.94681	0.17166
Usp3	9:66562554-66566903	4349	13	9	3	|	3	0	0	||	110	135	87	|	83	65	61	||	0	-2.7662	0.0737137	9.05596	0.000444545	||	0	-0.495681	0.717264	9.05596	0.127316
Ect2	3:27141626-27145059	3433	13	4	4	|	0	2	0	||	114	160	213	|	104	114	224	||	0	-3.00523	0.0928685	9.56829	0.000610977	||	0	-0.0399056	0.983222	9.56829	0.887271
Slc9a7	X:20186060-20188920	2860	9	2	0	|	0	0	0	||	23	46	38	|	3	4	3	||	0	-8.70923	0.104911	7.03262	0.000759273	||	0	-3.17422	2.01391e-07	7.03262	3.31235e-10
Mis18bp1	12:65148722-65149550	828	0	0	0	|	1	4	2	||	102	161	122	|	84	104	188	||	0	8.48992	0.104911	9.18153	0.000864234	||	0	0.0660763	0.971579	9.18153	0.803713
Slc8a1	17:81647809-81649638	1829	1	3	4	|	11	15	3	||	16	16	22	|	23	18	17	||	0	2.15426	0.104911	7.6819	0.000909597	||	0	0.266085	0.944221	7.6819	0.550805
Cep128	12:91325515-91339150	13635	0	0	1	|	10	1	2	||	63	171	149	|	54	113	228	||	0	3.87314	0.104911	9.25296	0.000920268	||	0	0.137562	0.961696	9.25296	0.750222
Zeb1	18:5633204-5705243	72039	11	1	3	|	1	0	0	||	42	52	33	|	22	27	33	||	0	-3.51657	0.119287	7.79362	0.00127136	||	0	-0.501402	0.702952	7.79362	0.114091
Trim33	3:103310309-103311513	1204	4	3	2	|	0	0	0	||	38	61	56	|	38	37	49	||	0	-8.4949	0.119287	8.0033	0.00130207	||	0	-0.180656	0.944221	8.0033	0.458261
Rlf	4:121182606-121190258	7652	6	1	2	|	0	0	0	||	58	76	79	|	50	49	69	||	0	-8.47968	0.119287	8.37267	0.00133728	||	0	-0.21013	0.903967	8.37267	0.335132
Ighm	12:113421405-113421664	259	7	5	1	|	0	0	0	||	3405	3607	2277	|	952	140	170	||	0	-9.03053	0.119287	12.4127	0.0013646	||	0	-2.66004	0.0286524	12.4127	0.000518382
Pax5	4:44691835-44697687	5852	10	1	2	|	0	0	0	||	132	340	191	|	32	4	5	||	0	-8.86077	0.119287	9.10175	0.00137337	||	0	-3.73092	3.84844e-05	9.10175	2.10989e-07
Ikzf1	11:11699334-11707904	8570	6	1	2	|	0	0	0	||	190	264	266	|	138	106	195	||	0	-8.47198	0.124911	9.70016	0.0015066	||	0	-0.593078	0.255829	9.70016	0.0123426
Atp2b4	1:133753089-133753749	660	34	4	8	|	37	23	23	||	226	195	217	|	166	117	334	||	0	1.36065	0.124948	10.8253	0.00158132	||	0	-0.0107959	0.992431	10.8253	0.974805
Zfp131	13:119765505-119790287	24782	1	0	0	|	3	1	6	||	79	63	49	|	66	48	56	||	0	3.67067	0.124948	8.37742	0.00164405	||	0	-0.0384612	0.987888	8.37742	0.910013
Susd1	4:59411270-59412322	1052	10	2	2	|	1	0	0	||	125	167	160	|	90	50	103	||	0	-3.42759	0.138202	9.14983	0.00189421	||	0	-0.771249	0.115741	9.14983	0.00313205
Rdx	9:52060871-52064955	4084	0	0	0	|	3	2	1	||	162	218	181	|	178	163	208	||	0	8.23151	0.146446	9.65519	0.0020875	||	0	0.115127	0.955588	9.65519	0.624942
Dgkd	1:87880368-87881939	1571	19	7	5	|	7	0	0	||	153	206	185	|	89	57	78	||	0	-1.8388	0.175297	9.51943	0.00259486	||	0	-1.12278	0.00494956	9.51943	7.0553e-05
Susd1	4:59390573-59428064	37491	5	1	2	|	0	0	0	||	100	137	139	|	75	35	73	||	0	-8.30551	0.182081	8.80993	0.00281337	||	0	-0.902842	0.0584892	8.80993	0.00125059
Pecam1	11:106679549-106685248	5699	5	2	1	|	0	0	0	||	89	141	92	|	57	52	44	||	0	-8.30647	0.182081	8.62936	0.00289493	||	0	-0.885973	0.117771	8.62936	0.00329295
not_annotated	2:148520638-148527680	7042	3	5	0	|	0	0	0	||	11	20	11	|	2	0	2	||	0	-8.37393	0.19298	6.08134	0.00322158	||	0	-3.06279	0.000907594	6.08134	9.4541e-06
Rpl4	9:64178382-64178508	126	0	0	0	|	4	1	1	||	2715	2238	1882	|	2982	2326	2172	||	0	8.19338	0.19298	12.8455	0.0033735	||	0	0.286039	0.944221	12.8455	0.515475
Hipk1	3:103769398-103778299	8901	5	1	2	|	0	0	0	||	209	400	494	|	193	240	534	||	0	-8.2953	0.19298	10.3692	0.00340368	||	0	-0.0998111	0.965408	10.3692	0.772259
Cacul1	19:60563162-60564294	1132	1	5	1	|	0	0	0	||	46	56	46	|	37	27	52	||	0	-8.15919	0.19298	7.90465	0.0043397	||	0	-0.238238	0.92876	7.90465	0.37524
Zeb1	18:5633204-5641518	8314	6	2	4	|	0	0	1	||	50	50	41	|	29	26	35	||	0	-3.22757	0.19298	7.86112	0.00438557	||	0	-0.522719	0.560729	7.86112	0.0651725
Cers6	2:68934515-68947357	12842	3	2	2	|	0	0	0	||	68	89	102	|	61	64	90	||	0	-8.13287	0.19298	8.61141	0.00448928	||	0	-0.136014	0.944221	8.61141	0.53666
Golph3	15:12339628-12343151	3523	1	2	4	|	0	0	0	||	262	256	244	|	244	170	247	||	0	-8.17036	0.19298	9.97068	0.00457104	||	0	-0.0772121	0.965408	9.97068	0.778589
Rreb1	13:37888871-37916595	27724	0	0	0	|	2	0	3	||	41	59	61	|	37	38	54	||	0	7.97329	0.19298	7.98397	0.00461781	||	0	-0.186555	0.944221	7.98397	0.434972
Mau2	8:70023588-70033244	9656	0	0	0	|	3	1	1	||	52	65	69	|	52	54	73	||	0	7.96601	0.19298	8.27221	0.00465619	||	0	0.0757086	0.961696	8.27221	0.729648
Osbpl9	4:109083089-109087485	4396	3	1	3	|	0	0	0	||	144	168	179	|	115	91	127	||	0	-8.13301	0.19298	9.2894	0.00465642	||	0	-0.420629	0.598665	9.2894	0.0727679
Ppp4r1	17:65837684-65838024	340	4	3	0	|	0	0	0	||	65	88	61	|	54	51	64	||	0	-8.12644	0.19298	8.36015	0.00466112	||	0	-0.201202	0.944221	8.36015	0.41531
Rev1	1:38107568-38108467	899	26	4	5	|	5	0	4	||	35	51	37	|	31	29	53	||	0	-1.55904	0.19298	8.42276	0.00479091	||	0	-0.0103474	0.991451	8.42276	0.971967
Lrrk2	15:91705106-91712862	7756	3	3	1	|	0	0	0	||	53	95	107	|	39	29	79	||	0	-8.14106	0.19298	8.37706	0.00486122	||	0	-0.693488	0.340492	8.37706	0.0207207
Gltp	5:114674054-114677679	3625	5	0	2	|	0	0	0	||	64	69	65	|	47	28	66	||	0	-8.11086	0.19298	8.19545	0.00487384	||	0	-0.389287	0.731098	8.19545	0.134275
Odf2	2:29893001-29922371	29370	0	0	0	|	2	3	0	||	102	123	133	|	91	120	223	||	0	7.97675	0.19298	9.20876	0.00493115	||	0	0.362398	0.773293	9.20876	0.177042
Zmynd11	13:9710146-9735466	25320	4	1	2	|	0	0	0	||	41	77	45	|	52	41	52	||	0	-8.12099	0.19298	8.0948	0.0049615	||	0	-0.010022	0.991451	8.0948	0.972427
Hspa4	11:53265924-53267118	1194	4	1	2	|	0	0	0	||	232	316	285	|	293	295	290	||	0	-8.12012	0.19298	10.1971	0.00507761	||	0	0.252178	0.903988	10.1971	0.344943
Birc6	17:74622909-74625239	2330	4	0	3	|	0	0	0	||	85	167	188	|	84	99	157	||	0	-8.11672	0.19298	9.19717	0.00517132	||	0	-0.234534	0.944221	9.19717	0.411267
Bcl2l13	6:120870766-120876346	5580	12	3	4	|	2	0	1	||	110	75	123	|	90	83	191	||	0	-2.30201	0.19298	9.19935	0.00527035	||	0	0.292278	0.903988	9.19935	0.344687
Kif15	9:123002035-123004693	2658	4	0	3	|	0	0	0	||	128	297	199	|	131	127	266	||	0	-8.11455	0.19298	9.65797	0.00539903	||	0	-0.139853	0.955694	9.65797	0.647147
Fbxo34	14:47500794-47509229	8435	0	0	0	|	2	3	0	||	17	32	32	|	14	30	48	||	0	7.98265	0.19298	7.35512	0.00546242	||	0	0.291251	0.944221	7.35512	0.470295
Slc22a4	11:54005394-54014456	9062	0	0	0	|	3	0	2	||	38	65	59	|	52	91	180	||	0	7.95893	0.19298	8.59615	0.00550171	||	0	1.07206	0.0734777	8.59615	0.00169192
Ralgps2	1:156900586-156907778	7192	5	2	0	|	0	0	0	||	70	128	82	|	29	15	17	||	0	-8.10238	0.19298	8.18852	0.00557611	||	0	-2.00732	6.05355e-06	8.18852	2.32318e-08
Smc6	12:11289637-11299429	9792	0	0	0	|	3	2	0	||	121	274	182	|	118	211	256	||	0	7.95703	0.19298	9.68194	0.00560743	||	0	0.174332	0.949762	9.68194	0.600967
Ank1	8:23084719-23095310	10591	2	0	0	|	6	3	2	||	474	443	492	|	292	306	1007	||	0	2.79308	0.203201	10.8577	0.00601582	||	0	0.183502	0.955588	10.8577	0.626057
St7	6:17844909-17855028	10119	1	0	0	|	4	4	0	||	72	54	67	|	81	69	93	||	0	3.301	0.205071	8.56628	0.00618362	||	0	0.450327	0.656363	8.56628	0.0939204
Cpsf6	10:117366081-117367988	1907	11	0	1	|	1	0	0	||	118	142	194	|	106	138	143	||	0	-3.16045	0.212885	9.37313	0.00653596	||	0	-0.0687589	0.973113	9.37313	0.815508
Calm1	12:100206156-100206233	77	4	6	2	|	1	0	0	||	2082	1702	1306	|	1582	632	939	||	0	-3.35912	0.21877	12.1434	0.00703327	||	0	-0.553308	0.857679	12.1434	0.249216
Wapl	14:34676954-34695105	18151	2	1	1	|	5	8	1	||	161	273	298	|	212	299	461	||	0	2.16034	0.21877	10.2533	0.00718653	||	0	0.533374	0.606392	10.2533	0.0773789
Rasa2	9:96602713-96611499	8786	47	4	10	|	12	1	2	||	73	49	45	|	40	28	31	||	0	-1.60507	0.21877	9.08597	0.0071958	||	0	-0.624823	0.779169	9.08597	0.181714
Nbas	12:13482386-13484044	1658	6	2	3	|	1	0	0	||	40	39	38	|	37	29	36	||	0	-3.10949	0.21877	7.7895	0.00719637	||	0	-0.0629991	0.975877	7.7895	0.826641
Tmem56	3:121235043-121235764	721	7	3	2	|	0	1	0	||	137	69	124	|	134	63	142	||	0	-3.19902	0.219287	9.11827	0.00735592	||	0	0.114146	0.961696	9.11827	0.75991
Zmynd11	13:9720773-9735466	14693	4	4	3	|	1	0	0	||	55	97	59	|	73	59	52	||	0	-3.15158	0.219287	8.4848	0.00751976	||	0	-0.00375468	0.997091	8.4848	0.990531
Fech	18:64470682-64478770	8088	1	0	0	|	3	2	3	||	1613	1110	1199	|	1582	1419	2183	||	0	3.34199	0.219287	12.2543	0.00764817	||	0	0.485802	0.787074	12.2543	0.189864
Kansl1	11:104368680-104378826	10146	15	1	4	|	4	0	0	||	76	133	120	|	74	61	99	||	0	-1.96221	0.219287	9.01054	0.00769429	||	0	-0.351208	0.764529	9.01054	0.1648
Pan3	5:147450653-147455188	4535	53	10	13	|	19	3	4	||	90	141	142	|	82	98	99	||	0	-1.18078	0.222053	10.0612	0.00827519	||	0	-0.243831	0.944221	10.0612	0.452269
Foxp1	6:99003200-99016665	13465	6	2	3	|	1	0	0	||	89	216	125	|	35	24	43	||	0	-3.11096	0.222053	8.77368	0.00832854	||	0	-1.91748	1.17e-06	8.77368	2.9295e-09
Zfp983	17:21652267-21680124	27857	0	0	2	|	7	2	1	||	40	35	41	|	37	26	35	||	0	2.59456	0.222053	7.76574	0.00836191	||	0	-0.111192	0.961696	7.76574	0.716429
Exoc5	14:49033271-49042549	9278	3	1	2	|	0	0	0	||	69	106	100	|	84	81	91	||	0	-7.9065	0.222053	8.74888	0.00866607	||	0	0.0577626	0.971579	8.74888	0.80592
Ubxn2b	4:6202292-6208943	6651	3	2	1	|	0	0	0	||	54	46	62	|	53	38	76	||	0	-7.90838	0.222053	8.1562	0.00870614	||	0	0.143466	0.944221	8.1562	0.584258
2700049A03Rik	12:71216042-71219299	3257	3	2	1	|	0	0	0	||	17	22	18	|	13	11	19	||	0	-7.90846	0.222053	6.7744	0.008734	||	0	-0.282242	0.944221	6.7744	0.428092
Mipol1	12:57303345-57307464	4119	2	3	1	|	0	0	0	||	14	17	12	|	14	10	15	||	0	-7.92793	0.222053	6.578	0.00877749	||	0	-0.0125542	0.992431	6.578	0.975224
Nvl	1:181109160-181123984	14824	3	0	3	|	0	0	0	||	80	124	86	|	77	98	139	||	0	-7.90445	0.222053	8.89602	0.00885834	||	0	0.23928	0.903988	8.89602	0.337581
Lemd3	10:120947204-120952255	5051	4	0	2	|	0	0	0	||	34	42	38	|	27	38	51	||	0	-7.895	0.222053	7.72494	0.00888699	||	0	0.145534	0.949183	7.72494	0.598443
Ncor1	11:62433563-62438515	4952	5	0	1	|	0	0	0	||	130	192	182	|	102	128	199	||	0	-7.88022	0.227405	9.41318	0.00934592	||	0	-0.113855	0.955694	9.41318	0.642975
Slc1a5	7:16785676-16786912	1236	4	0	2	|	0	0	0	||	355	485	398	|	240	211	432	||	0	-7.88975	0.227405	10.4059	0.00935055	||	0	-0.395363	0.70537	10.4059	0.12224
Susd1	4:59423995-59428064	4069	7	2	5	|	1	0	1	||	109	135	159	|	86	38	72	||	0	-2.46832	0.230599	8.99786	0.00962931	||	0	-0.893596	0.115741	8.99786	0.00306405
Specc1	11:62117700-62119282	1582	2	3	1	|	5	6	6	||	169	278	258	|	176	226	512	||	0	1.86042	0.230599	10.218	0.0097347	||	0	0.445725	0.764529	10.218	0.163688
Mcm6	1:128348369-128353570	5201	4	0	2	|	0	0	0	||	546	534	709	|	691	399	1079	||	0	-7.87961	0.241699	11.1721	0.0103358	||	0	0.348025	0.878017	11.1721	0.287143
Canx	11:50307470-50310867	3397	0	0	0	|	0	2	2	||	552	547	701	|	672	636	684	||	0	7.69374	0.254216	11.1574	0.0113836	||	0	0.30496	0.889696	11.1574	0.31315
Pax5	4:44645548-44697687	52139	2	1	3	|	0	0	0	||	83	266	158	|	19	8	3	||	0	-7.95126	0.254216	8.69325	0.0114581	||	0	-3.77482	1.58386e-07	8.69325	1.73669e-10
Ascc3	10:50767091-50767507	416	0	0	0	|	2	0	2	||	52	53	66	|	42	59	84	||	0	7.64915	0.254216	8.22482	0.011485	||	0	0.22511	0.933564	8.22482	0.380796
Nsd3	8:25659741-25666156	6415	0	0	0	|	2	0	2	||	81	156	150	|	80	93	159	||	0	7.64935	0.254216	9.06889	0.0117446	||	0	-0.0963637	0.961696	9.06889	0.715818
Fnip2	3:79479487-79481879	2392	0	0	0	|	0	2	2	||	36	51	79	|	75	149	278	||	0	7.71616	0.254216	8.98705	0.0117576	||	0	1.67385	0.00244117	8.98705	3.07823e-05
Tbcd	11:121492558-121503787	11229	0	0	0	|	2	0	2	||	103	191	174	|	155	198	278	||	0	7.64941	0.254216	9.61245	0.0118147	||	0	0.571677	0.405409	9.61245	0.0315615
Jarid2	13:44902226-44903258	1032	0	0	0	|	2	0	2	||	22	55	42	|	26	20	43	||	0	7.64957	0.254216	7.54511	0.0120392	||	0	-0.289388	0.937719	7.54511	0.395531
Arid1b	17:5040580-5127024	86444	7	0	3	|	0	0	1	||	55	71	59	|	24	20	33	||	0	-2.9494	0.254216	7.94954	0.0121184	||	0	-1.13559	0.00116276	7.94954	1.3387e-05
Vps13a	19:16710271-16725693	15422	0	0	0	|	2	2	0	||	61	131	101	|	53	92	82	||	0	7.64867	0.254216	8.68986	0.0122076	||	0	-0.181621	0.944221	8.68986	0.567921
Ubr4	4:139390840-139393419	2579	0	0	0	|	2	0	2	||	68	121	133	|	61	72	175	||	0	7.64974	0.254216	8.89029	0.0122648	||	0	0.0145193	0.989893	8.89029	0.963843
Ppm1d	11:85326864-85339796	12932	0	0	0	|	3	0	1	||	121	103	91	|	109	58	136	||	0	7.62968	0.25527	8.90722	0.0125017	||	0	0.0228639	0.988023	8.90722	0.940131
Svil	18:5063194-5088814	25620	0	0	0	|	3	1	0	||	39	81	108	|	56	80	97	||	0	7.6276	0.25527	8.53405	0.0126704	||	0	0.194567	0.944221	8.53405	0.547343
Picalm	7:90160448-90182368	21920	1	0	0	|	3	2	2	||	541	609	631	|	537	463	840	||	0	3.11946	0.25527	11.088	0.012817	||	0	0.147414	0.944221	11.088	0.575687
Phf21a	2:92221472-92230724	9252	0	0	0	|	4	0	0	||	88	88	67	|	62	36	48	||	0	7.61064	0.25527	8.34321	0.0128754	||	0	-0.594281	0.547851	8.34321	0.0609963
Gas2	7:51887912-51926544	38632	0	0	0	|	3	0	1	||	18	10	10	|	19	16	32	||	0	7.62354	0.257262	6.79101	0.0131366	||	0	0.879253	0.466873	6.79101	0.0428238
Smc3	19:53620589-53621906	1317	5	4	1	|	1	0	0	||	139	299	217	|	163	235	340	||	0	-2.99014	0.257262	9.94732	0.013258	||	0	0.309817	0.884914	9.94732	0.302267
Fgfr2	7:130218998-130242644	23646	0	0	0	|	2	1	1	||	44	24	25	|	62	41	32	||	0	7.6497	0.263988	7.73854	0.0137494	||	0	0.688627	0.733543	7.73854	0.135528
Wdr26	1:181187606-181198944	11338	0	0	0	|	2	1	1	||	234	668	664	|	304	578	1128	||	0	7.64977	0.265397	11.0141	0.0139683	||	0	0.464528	0.878017	11.0141	0.288976
Garem1	18:21147732-21148904	1172	0	1	0	|	1	4	2	||	10	11	15	|	8	14	29	||	0	3.15455	0.269682	6.67545	0.0144656	||	0	0.570408	0.850526	6.67545	0.231283
Cpq	15:33249926-33497364	247438	0	0	0	|	2	2	0	||	49	30	25	|	45	31	19	||	0	7.64868	0.269682	7.56849	0.0144895	||	0	0.0382215	0.988023	7.56849	0.939873
Chsy1	7:66125242-66125737	495	19	0	5	|	4	0	2	||	60	56	66	|	44	28	49	||	0	-1.59898	0.27237	8.43386	0.0151875	||	0	-0.46993	0.702952	8.43386	0.116003
Mmp15	8:95365314-95366422	1108	0	0	0	|	2	2	0	||	0	0	0	|	3	0	0	||	0	7.64867	0.27237	4.73527	0.015382	||	0	2.44153	0.461109	4.73527	0.0404482
Zfp827	8:79118175-79120540	2365	4	2	0	|	0	0	0	||	22	25	11	|	15	11	2	||	0	-7.86106	0.27237	6.64511	0.0160452	||	0	-0.799299	0.856165	6.64511	0.24472
Mybl2	2:163059501-163064500	4999	1	2	2	|	0	0	0	||	112	133	132	|	110	101	265	||	0	-7.67385	0.27237	9.28844	0.0163313	||	0	0.39107	0.773269	9.28844	0.172596
Acbd3	1:180733166-180738637	5471	1	2	2	|	0	0	0	||	25	41	53	|	24	26	25	||	0	-7.67401	0.27237	7.50405	0.0163367	||	0	-0.491248	0.757679	7.50405	0.14996
Tubgcp3	8:12636946-12641207	4261	3	2	0	|	0	0	0	||	149	168	147	|	126	126	203	||	0	-7.6415	0.27237	9.40154	0.0165849	||	0	0.0781666	0.961696	9.40154	0.735752
Dock2	11:34501170-34503414	2244	2	0	3	|	0	0	0	||	220	370	314	|	182	133	236	||	0	-7.64955	0.27237	9.94367	0.0166822	||	0	-0.579259	0.367528	9.94367	0.022769
Herc4	10:63289052-63311914	22862	3	2	0	|	0	0	0	||	149	194	166	|	126	174	181	||	0	-7.6406	0.27237	9.50504	0.0169629	||	0	0.0704938	0.967661	9.50504	0.786547
Dtnb	12:3617606-3686862	69256	2	1	2	|	0	0	0	||	34	50	40	|	25	17	57	||	0	-7.6543	0.27237	7.64199	0.0170041	||	0	-0.252105	0.944221	7.64199	0.456548
Bard1	1:71074543-71089527	14984	6	1	1	|	9	4	5	||	100	120	117	|	92	88	201	||	0	1.52071	0.27237	9.32189	0.0170507	||	0	0.25051	0.903967	9.32189	0.336014
Fgfr2	7:130218998-130241277	22279	0	0	0	|	4	0	0	||	64	29	31	|	81	47	39	||	0	7.55243	0.27237	8.03803	0.0170516	||	0	0.568224	0.872095	8.03803	0.263357
Prc1	7:80313527-80313748	221	3	2	0	|	0	0	0	||	100	134	120	|	79	74	190	||	0	-7.6403	0.27237	9.03409	0.017096	||	0	0.0198812	0.988023	9.03409	0.942623
Gigyf2	1:87364104-87380008	15904	50	16	21	|	17	6	12	||	104	93	97	|	51	58	121	||	0	-0.936301	0.27237	10.1808	0.0171226	||	0	-0.291059	0.891852	10.1808	0.319701
Rftn1	17:50047297-50055627	8330	4	0	1	|	0	0	0	||	42	53	49	|	30	26	26	||	0	-7.62554	0.27237	7.6894	0.0171316	||	0	-0.654668	0.380534	7.6894	0.0264955
Cse1l	2:166928958-166929987	1029	3	2	0	|	0	0	0	||	162	235	149	|	162	129	159	||	0	-7.64008	0.27237	9.50935	0.0171976	||	0	-0.122431	0.957698	9.50935	0.658943
Rbm33	5:28331111-28339308	8197	9	3	3	|	2	0	1	||	76	135	110	|	73	91	138	||	0	-1.98053	0.27237	9.06431	0.0177112	||	0	0.040132	0.982691	9.06431	0.870833
Diaph3	14:86810336-86835101	24765	3	0	2	|	0	0	0	||	122	224	195	|	140	121	315	||	0	-7.63252	0.27237	9.6054	0.0177197	||	0	0.171326	0.944221	9.6054	0.565133
Slc20a2	8:22535019-22545600	10581	0	1	0	|	3	1	3	||	31	29	29	|	49	22	21	||	0	3.09523	0.27237	7.52	0.0177285	||	0	0.22773	0.949822	7.52	0.612344
N4bp2l2	5:150647001-150647548	547	5	0	0	|	0	0	0	||	182	248	201	|	159	170	181	||	0	-7.6077	0.27237	9.67205	0.0179234	||	0	-0.146206	0.944221	9.67205	0.571575
Arhgap26	18:39126833-39150118	23285	4	0	1	|	0	0	0	||	25	46	37	|	29	46	42	||	0	-7.61709	0.27237	7.69	0.0179555	||	0	0.281603	0.934711	7.69	0.392538
Pou2af1	9:51232232-51233243	1011	8	5	1	|	1	0	0	||	298	403	414	|	106	6	5	||	0	-3.52408	0.27237	9.81661	0.0180986	||	0	-2.96521	0.0671036	9.81661	0.00147157
Aasdh	5:76888030-76904380	16350	3	0	2	|	0	0	0	||	17	18	15	|	12	16	11	||	0	-7.63071	0.27237	6.64674	0.018101	||	0	-0.197888	0.955694	6.64674	0.644773
Asxl2	12:3476949-3484608	7659	3	0	2	|	0	0	0	||	18	63	44	|	35	32	56	||	0	-7.62995	0.27237	7.77635	0.0182649	||	0	0.126335	0.961696	7.77635	0.729463
St13	15:81382980-81392322	9342	3	2	0	|	0	0	0	||	187	138	175	|	186	138	125	||	0	-7.63785	0.27237	9.47923	0.0182806	||	0	0.00873408	0.994016	9.47923	0.979862
Ddx17	15:79536997-79537545	548	5	0	0	|	0	0	0	||	331	609	548	|	336	297	450	||	0	-7.60171	0.27237	10.6358	0.0183671	||	0	-0.307706	0.867937	10.6358	0.256479
Drc7	8:95061713-95062395	682	3	2	1	|	0	0	0	||	7	12	19	|	10	0	0	||	0	-7.92479	0.277111	6.06314	0.0188387	||	0	-1.59928	0.605032	6.06314	0.0745518
Zfp292	4:34839332-34839986	654	20	5	8	|	7	2	2	||	79	120	91	|	62	43	59	||	0	-1.24304	0.278533	9.06238	0.0190881	||	0	-0.669362	0.235704	9.06238	0.0104723
Fyb	15:6640441-6652544	12103	0	0	1	|	6	1	0	||	60	134	93	|	71	133	88	||	0	3.01795	0.281542	8.89228	0.0196697	||	0	0.246255	0.944221	8.89228	0.516124
Cdk17	10:93235438-93236963	1525	11	4	2	|	3	0	1	||	92	130	125	|	82	78	125	||	0	-1.74772	0.281542	9.11803	0.0197509	||	0	-0.158796	0.944221	9.11803	0.473881
Spag5	11:78319986-78321766	1780	27	8	11	|	36	16	15	||	165	212	189	|	145	181	342	||	0	0.887273	0.281542	10.6838	0.0198507	||	0	0.321634	0.850526	10.6838	0.230736
Pex7	10:19884778-19894802	10024	5	0	0	|	0	0	0	||	98	57	71	|	96	61	82	||	0	-7.58113	0.281542	8.59411	0.019988	||	0	0.194107	0.944221	8.59411	0.585721
Hist1h1a	13:23764182-23764244	62	2	2	1	|	0	0	0	||	7500	6485	6532	|	7465	3316	6809	||	0	-7.67974	0.281542	14.1006	0.0201987	||	0	-0.115756	0.973113	14.1006	0.815729
2010111I01Rik	13:63061035-63068285	7250	6	1	2	|	1	0	0	||	19	27	27	|	15	18	21	||	0	-2.80992	0.281542	7.12626	0.0202204	||	0	-0.294969	0.917571	7.12626	0.362708
Mtmr12	15:12230274-12233926	3652	7	1	1	|	0	1	0	||	40	45	37	|	41	42	62	||	0	-2.79552	0.282367	7.97549	0.0204344	||	0	0.365768	0.745427	7.97549	0.145453
Fam160b1	19:57378549-57379175	626	28	5	5	|	12	0	1	||	41	59	43	|	33	34	48	||	0	-1.20583	0.285453	8.62736	0.0208142	||	0	-0.183467	0.944221	8.62736	0.563765
Dusp16	6:134758619-134761434	2815	4	1	0	|	0	0	0	||	13	16	10	|	22	14	10	||	0	-7.5936	0.287465	6.60936	0.0211186	||	0	0.419243	0.944221	6.60936	0.412447
Pitpnb	5:111346483-111349574	3091	8	2	9	|	3	2	0	||	81	93	91	|	79	60	71	||	0	-1.61575	0.290146	8.85975	0.0222184	||	0	-0.183127	0.944221	8.85975	0.484461
Dfna5	6:50245930-50251513	5583	3	0	2	|	0	0	0	||	15	22	30	|	6	3	28	||	0	-7.61172	0.290146	6.75342	0.0228178	||	0	-0.840096	0.757679	6.75342	0.151984
Ppp2r5a	1:191368641-191372666	4025	6	2	1	|	1	0	0	||	240	250	282	|	200	98	210	||	0	-2.80617	0.290146	9.84065	0.0230773	||	0	-0.49039	0.662285	9.84065	0.0958571
Sclt1	3:41727093-41734235	7142	7	2	0	|	1	0	0	||	36	35	38	|	47	35	37	||	0	-2.79267	0.290146	7.80835	0.0230969	||	0	0.279325	0.934366	7.80835	0.387661
Cnot4	6:35064898-35080226	15328	1	1	0	|	2	2	4	||	52	87	55	|	27	40	58	||	0	2.33889	0.290146	8.17137	0.0239869	||	0	-0.51026	0.608845	8.17137	0.0791933
Taok2	7:126878723-126879452	729	6	3	0	|	0	1	0	||	58	132	111	|	48	58	117	||	0	-2.7884	0.290146	8.73886	0.0241429	||	0	-0.321456	0.884914	8.73886	0.300163
Arl13b	16:62827164-62830813	3649	7	2	0	|	1	0	0	||	12	15	10	|	15	10	15	||	0	-2.78803	0.290146	6.62304	0.0244593	||	0	0.239348	0.944221	6.62304	0.579587
Txlng	X:162790612-162811595	20983	1	0	0	|	3	0	3	||	25	33	36	|	33	36	42	||	0	2.88566	0.290146	7.61989	0.0247563	||	0	0.378767	0.773269	7.61989	0.172095
Med13l	5:118593333-118593570	237	127	27	43	|	57	17	8	||	229	203	234	|	159	121	288	||	0	-0.954707	0.290146	11.6372	0.025498	||	0	-0.170609	0.957698	11.6372	0.658183
Zranb1	7:132948044-132950435	2391	24	16	13	|	16	5	2	||	68	76	64	|	60	74	85	||	0	-0.959601	0.290146	9.48993	0.02555	||	0	0.207509	0.944221	9.48993	0.450902
Bach2	4:32317198-32417583	100385	7	4	2	|	2	0	0	||	125	326	242	|	36	6	10	||	0	-2.42094	0.290146	9.19419	0.0258503	||	0	-3.48021	1.17e-06	9.19419	3.20724e-09
Strn3	12:51621780-51661713	39933	0	0	1	|	2	4	0	||	100	84	115	|	89	103	119	||	0	2.88719	0.290146	8.94544	0.0258879	||	0	0.18753	0.944221	8.94544	0.479245
Mbnl1	3:60528756-60529804	1048	1	0	0	|	2	4	0	||	433	742	579	|	400	500	611	||	0	2.91011	0.290146	10.9584	0.0260798	||	0	-0.0603312	0.979472	10.9584	0.834905
Nsmaf	4:6432680-6440989	8309	0	1	0	|	4	2	0	||	76	98	105	|	110	121	140	||	0	2.86332	0.290146	9.02029	0.0262521	||	0	0.559986	0.294327	9.02029	0.0154909
Tmem164	X:142752040-142834393	82353	21	6	8	|	7	2	4	||	62	72	79	|	49	44	72	||	0	-1.08249	0.290146	8.94577	0.0269277	||	0	-0.248398	0.880478	8.94577	0.294941
Arhgap12	18:6111685-6115850	4165	10	2	2	|	3	0	0	||	46	60	48	|	37	23	31	||	0	-1.87578	0.290146	7.98954	0.0275052	||	0	-0.610139	0.452108	7.98954	0.038915
Aff3	1:38534906-38536946	2040	26	6	6	|	9	2	0	||	77	133	74	|	22	8	5	||	0	-1.45871	0.290146	8.77221	0.0277312	||	0	-2.77621	2.606e-05	8.77221	1.28586e-07
Nck1	9:100497258-100497970	712	0	0	0	|	1	2	0	||	92	107	89	|	55	39	70	||	0	7.24064	0.290146	8.49712	0.0279366	||	0	-0.695281	0.115741	8.49712	0.00317273
Map2k4	11:65706984-65719603	12619	0	0	0	|	1	2	0	||	67	91	90	|	68	60	69	||	0	7.24073	0.290146	8.49233	0.0279505	||	0	-0.177304	0.944221	8.49233	0.451123
Ubr2	17:46961499-46976090	14591	0	0	0	|	0	3	0	||	66	110	134	|	85	111	200	||	0	7.26478	0.290146	9.04099	0.0279902	||	0	0.461227	0.704264	9.04099	0.118982
Ascc2	11:4649740-4656336	6596	0	0	0	|	2	1	0	||	39	43	44	|	35	33	50	||	0	7.23222	0.290146	7.74678	0.0280791	||	0	0.0265574	0.987924	7.74678	0.915395
Palb2	7:122113250-122123708	10458	1	1	0	|	6	0	2	||	32	29	30	|	31	17	37	||	0	2.28218	0.290146	7.49266	0.0281609	||	0	0.00652869	0.99602	7.49266	0.98388
Pias2	18:77133091-77150098	17007	0	0	0	|	1	2	0	||	38	77	50	|	53	57	58	||	0	7.24371	0.290146	8.1366	0.0284116	||	0	0.198551	0.944221	8.1366	0.496022
Cntn3	6:102514164-102515609	1445	0	0	0	|	0	2	1	||	1	3	3	|	3	3	8	||	0	7.28686	0.290146	5.329	0.0286076	||	0	1.02869	0.737405	5.329	0.140075
Rere	4:150500003-150510038	10035	0	0	0	|	3	0	0	||	34	50	49	|	28	27	31	||	0	7.22119	0.290146	7.61087	0.0287219	||	0	-0.478968	0.620205	7.61087	0.0844163
Vps13a	19:16759587-16766540	6953	0	0	0	|	1	2	0	||	66	118	96	|	56	76	55	||	0	7.2458	0.290146	8.55307	0.0287465	||	0	-0.380001	0.831291	8.55307	0.219867
Nf2	11:4803678-4820493	16815	0	0	0	|	3	0	0	||	34	54	38	|	40	34	47	||	0	7.22013	0.290146	7.76164	0.0288323	||	0	0.0808724	0.961696	7.76164	0.766867
Slc30a7	3:115978644-115993039	14395	0	0	0	|	2	0	1	||	45	70	61	|	72	60	58	||	0	7.22912	0.290146	8.26418	0.02887	||	0	0.28825	0.884914	8.26418	0.305579
Ube2k	5:65565989-65594548	28559	60	18	15	|	28	3	5	||	226	238	129	|	238	167	170	||	0	-1.10779	0.290146	10.7345	0.0289919	||	0	0.114063	0.967661	10.7345	0.786755
Uvrag	7:99004580-99016674	12094	0	0	0	|	3	0	0	||	37	49	64	|	52	35	56	||	0	7.21776	0.290146	7.96773	0.0290786	||	0	0.0708348	0.971579	7.96773	0.796707
Klc1	12:111772319-111774583	2264	0	0	0	|	2	0	1	||	73	98	85	|	87	49	65	||	0	7.22818	0.290146	8.52771	0.0291043	||	0	-0.186491	0.944221	8.52771	0.517541
Prkag2	5:24866079-24871659	5580	0	0	0	|	3	0	0	||	17	29	25	|	17	16	21	||	0	7.21734	0.290146	6.94976	0.0291233	||	0	-0.251568	0.944221	6.94976	0.456422
Fam20a	11:109682837-109685527	2690	0	0	0	|	0	0	3	||	2	1	4	|	3	3	2	||	0	7.31149	0.290146	5.15413	0.029273	||	0	0.315172	0.961696	5.15413	0.69407
Lrba	3:86291427-86304733	13306	0	0	0	|	2	1	0	||	43	89	100	|	52	58	128	||	0	7.22582	0.290146	8.51931	0.029601	||	0	0.137883	0.957987	8.51931	0.661188
Stk39	2:68358814-68410141	51327	0	0	0	|	2	0	1	||	8	8	4	|	11	8	12	||	0	7.22558	0.290146	6.03323	0.0297713	||	0	0.73307	0.734603	6.03323	0.136881
Ttc7b	12:100373544-100376248	2704	0	2	2	|	0	0	0	||	24	32	31	|	21	11	22	||	0	-7.35522	0.290146	7.10818	0.0306491	||	0	-0.554507	0.684452	7.10818	0.103568
Ddx19a	8:110980553-110981093	540	0	1	3	|	0	0	0	||	107	100	124	|	127	95	147	||	0	-7.34885	0.290146	9.07225	0.0306835	||	0	0.278698	0.864605	9.07225	0.255021
Bbx	16:50274547-50280539	5992	0	0	0	|	3	0	0	||	33	47	61	|	47	47	35	||	0	7.20281	0.290146	7.88795	0.0306985	||	0	0.0705997	0.980863	7.88795	0.83861
Vps13b	15:35533296-35534360	1064	9	0	3	|	1	1	0	||	162	329	227	|	96	175	255	||	0	-2.1796	0.290146	9.81957	0.0308202	||	0	-0.323774	0.903988	9.81957	0.338159
Rbm27	18:42320764-42324198	3434	1	3	0	|	0	0	0	||	50	88	65	|	32	37	66	||	0	-7.34067	0.290146	8.13768	0.030997	||	0	-0.471048	0.608845	8.13768	0.0790158
Stk3	15:35039664-35039741	77	1	0	0	|	3	0	3	||	2	4	4	|	2	3	10	||	0	2.90283	0.290146	5.60195	0.0311333	||	0	0.629164	0.903988	5.60195	0.344223
Stap1	5:86090897-86096593	5696	5	3	3	|	1	0	1	||	61	88	51	|	43	32	41	||	0	-2.13122	0.290146	8.21891	0.0313496	||	0	-0.637378	0.387754	8.21891	0.0286989
Eed	7:89969571-89972323	2752	1	1	2	|	0	0	0	||	111	112	125	|	121	84	106	||	0	-7.3393	0.290146	9.00127	0.0313793	||	0	-0.0140196	0.989186	9.00127	0.957717
Mllt10	2:18186218-18197997	11779	2	0	2	|	0	0	0	||	61	103	91	|	68	76	102	||	0	-7.32347	0.290146	8.64021	0.0314095	||	0	0.0895615	0.961696	8.64021	0.694013
Nucks1	1:131928064-131929762	1698	1	1	2	|	0	0	0	||	365	581	497	|	360	355	598	||	0	-7.34065	0.290146	10.7237	0.0314848	||	0	-0.0148501	0.989186	10.7237	0.953887
Kmt2e	5:23446526-23450336	3810	2	0	2	|	0	0	0	||	81	116	124	|	78	89	139	||	0	-7.32337	0.290146	8.91103	0.0315231	||	0	0.053387	0.973113	8.91103	0.815089
Bcl2l13	6:120862855-120865724	2869	1	1	2	|	0	0	0	||	84	57	98	|	68	68	127	||	0	-7.342	0.290146	8.64674	0.0315923	||	0	0.21594	0.944221	8.64674	0.458889
Nrf1	6:30088833-30126359	37526	2	0	2	|	0	0	0	||	88	82	107	|	92	74	126	||	0	-7.32331	0.290146	8.80446	0.0315992	||	0	0.186616	0.944221	8.80446	0.429797
Spin1	13:51123088-51127973	4885	2	0	2	|	0	0	0	||	36	50	49	|	31	18	32	||	0	-7.32327	0.290146	7.60606	0.0316442	||	0	-0.59951	0.443194	7.60606	0.0369857
Rock1	18:10119885-10132272	12387	1	2	1	|	0	0	0	||	116	207	199	|	102	136	265	||	0	-7.34843	0.290146	9.49925	0.0316785	||	0	0.043779	0.983222	9.49925	0.883308
Mga	2:119921366-119921842	476	1	2	1	|	0	0	0	||	51	96	69	|	50	73	53	||	0	-7.34869	0.290146	8.3559	0.0316948	||	0	-0.0958831	0.961696	8.3559	0.764914
Snx25	8:46103515-46124146	20631	2	0	2	|	0	0	0	||	34	40	43	|	28	25	25	||	0	-7.32315	0.290146	7.50036	0.0317876	||	0	-0.430516	0.757679	7.50036	0.152421
Pcm1	8:41274995-41290892	15897	2	2	0	|	0	0	0	||	40	83	68	|	47	62	66	||	0	-7.32771	0.290146	8.25658	0.0318353	||	0	0.0403211	0.983222	8.25658	0.885372
Akt3	1:177102962-177109738	6776	2	0	2	|	0	0	0	||	91	128	78	|	65	67	80	||	0	-7.32303	0.290146	8.66627	0.0319412	||	0	-0.343016	0.787186	8.66627	0.191283
Specc1l	10:75274017-75279961	5944	3	0	1	|	0	0	0	||	33	47	49	|	32	37	40	||	0	-7.31346	0.290146	7.73449	0.0320085	||	0	-0.0938974	0.961696	7.73449	0.731506
Itsn2	12:4630637-4633562	2925	3	1	0	|	0	0	0	||	126	187	166	|	91	107	137	||	0	-7.31456	0.290146	9.2339	0.0320466	||	0	-0.373837	0.691086	9.2339	0.106835
Vps54	11:21263199-21264871	1672	4	0	0	|	0	0	0	||	59	63	61	|	34	43	62	||	0	-7.30629	0.290146	8.09399	0.0321666	||	0	-0.282361	0.864034	8.09399	0.252957
Inpp5a	7:139477995-139481719	3724	2	1	1	|	0	0	0	||	74	69	57	|	40	27	34	||	0	-7.32545	0.290146	8.02595	0.0321794	||	0	-0.849897	0.16645	8.02595	0.00556658
Ecd	14:20329954-20338496	8542	2	2	0	|	0	0	0	||	97	77	84	|	105	75	89	||	0	-7.32865	0.290146	8.73633	0.0322808	||	0	0.197745	0.944221	8.73633	0.503387
Ankrd11	8:122908668-122916045	7377	5	1	2	|	1	0	0	||	81	97	106	|	72	72	103	||	0	-2.64635	0.290146	8.77604	0.0324504	||	0	-0.0734154	0.961696	8.77604	0.731489
Sorl1	9:42057271-42067989	10718	2	0	2	|	0	0	0	||	74	145	137	|	44	58	110	||	0	-7.32258	0.290146	8.76223	0.0324754	||	0	-0.636026	0.39114	8.76223	0.0291639
Hsdl2	4:59596863-59606543	9680	2	2	0	|	0	0	0	||	61	57	43	|	61	29	67	||	0	-7.32921	0.290146	8.09032	0.0325459	||	0	0.0580513	0.982691	8.09032	0.859063
Trpm7	2:126823976-126825789	1813	2	0	2	|	0	0	0	||	81	149	109	|	71	116	115	||	0	-7.32251	0.290146	8.95065	0.0325657	||	0	0.0013551	0.998257	8.95065	0.996333
Naa16	14:79369078-79377521	8443	2	0	2	|	0	0	0	||	27	66	45	|	38	28	40	||	0	-7.32249	0.290146	7.7516	0.0325891	||	0	-0.215788	0.944221	7.7516	0.50886
Vps13b	15:35417511-35430284	12773	2	0	2	|	0	0	0	||	192	351	339	|	169	180	357	||	0	-7.32247	0.290146	10.0317	0.0326067	||	0	-0.213887	0.944221	10.0317	0.445922
Pias1	9:62912750-62920548	7798	2	0	2	|	0	0	0	||	121	150	81	|	78	62	82	||	0	-7.32243	0.290146	8.81692	0.0326601	||	0	-0.529854	0.608845	8.81692	0.0781209
Uap1	1:170149271-170166948	17677	2	2	0	|	0	0	0	||	76	63	49	|	74	35	84	||	0	-7.32981	0.290146	8.31449	0.0328387	||	0	0.119041	0.961696	8.31449	0.723676
Spire1	18:67545615-67587859	42244	2	0	2	|	0	0	0	||	82	114	134	|	71	102	217	||	0	-7.32218	0.290146	9.06321	0.0329632	||	0	0.314045	0.888683	9.06321	0.311819
Ralgapa2	2:146387228-146406432	19204	3	0	1	|	0	0	0	||	40	48	52	|	22	43	49	||	0	-7.30736	0.290146	7.80776	0.033017	||	0	-0.166642	0.947086	7.80776	0.592303
Lrp5	19:3647528-3659640	12112	0	0	0	|	3	0	0	||	25	21	16	|	28	17	16	||	0	7.18235	0.290146	6.96441	0.0330945	||	0	0.130894	0.965408	6.96441	0.778584
Rock1	18:10131530-10132272	742	2	0	2	|	0	0	0	||	133	253	237	|	114	148	310	||	0	-7.322	0.290146	9.67931	0.0331716	||	0	-0.0315749	0.987924	9.67931	0.919822
Sox6	7:115801369-115801609	240	2	2	0	|	0	0	0	||	525	515	628	|	409	300	901	||	0	-7.33063	0.290146	10.9197	0.0332375	||	0	-0.0139565	0.98992	10.9197	0.966295
Zbtb48	4:152020190-152020708	518	3	0	1	|	0	0	0	||	9	13	12	|	9	6	7	||	0	-7.30551	0.290146	6.14225	0.0333312	||	0	-0.471857	0.886465	6.14225	0.30861
Zfp346	13:55113036-55122515	9479	0	0	0	|	3	0	0	||	24	35	39	|	12	37	58	||	0	7.18038	0.290146	7.51484	0.0333365	||	0	0.217666	0.955588	7.51484	0.624603
Rfx7	9:72577039-72593360	16321	4	0	0	|	0	0	0	||	46	58	44	|	38	40	37	||	0	-7.295	0.290146	7.86451	0.0333974	||	0	-0.205402	0.944221	7.86451	0.493031
Syt14	1:192980346-192986882	6536	1	2	2	|	5	5	3	||	26	40	30	|	31	83	78	||	0	1.69078	0.290146	8.22317	0.033405	||	0	1.14464	0.0910984	8.22317	0.00219755
Plcg2	8:117555975-117558116	2141	4	2	2	|	0	0	1	||	78	142	130	|	69	50	98	||	0	-2.64494	0.293773	8.83452	0.0339836	||	0	-0.559018	0.379384	8.83452	0.0249594
Cops7b	1:86599003-86601188	2185	4	0	0	|	0	0	0	||	50	46	39	|	50	54	46	||	0	-7.28705	0.29502	7.98142	0.0342959	||	0	0.305523	0.903988	7.98142	0.343896
Rere	4:150406196-150439468	33272	4	4	0	|	1	0	0	||	23	39	31	|	27	14	23	||	0	-2.66828	0.29502	7.33733	0.0345901	||	0	-0.386222	0.878017	7.33733	0.280266
Smc6	12:11279605-11280402	797	4	2	2	|	1	0	0	||	128	214	167	|	125	196	227	||	0	-2.66102	0.29502	9.61315	0.034613	||	0	0.255342	0.916267	9.61315	0.356299
Srbd1	17:86098512-86109334	10822	5	0	0	|	8	2	2	||	60	88	81	|	85	81	138	||	0	1.59059	0.29626	8.88057	0.034921	||	0	0.526114	0.340492	8.88057	0.0205052
Rad18	6:112672124-112681676	9552	2	0	3	|	5	5	2	||	93	102	104	|	103	91	160	||	0	1.59038	0.29815	9.13029	0.0353073	||	0	0.349104	0.704264	9.13029	0.12008
Cd48	1:171695664-171699650	3986	2	2	0	|	0	0	0	||	300	186	222	|	253	99	127	||	0	-7.33508	0.298373	9.74277	0.0354973	||	0	-0.418006	0.904279	9.74277	0.346541
Vps50	6:3545510-3555466	9956	5	1	2	|	1	0	0	||	30	42	35	|	43	30	32	||	0	-2.6432	0.298698	7.69972	0.0356997	||	0	0.137489	0.960131	7.69972	0.669095
Epb41l2	10:25441573-25443954	2381	3	0	1	|	0	0	0	||	39	63	53	|	65	23	30	||	0	-7.28705	0.304123	7.9091	0.0366955	||	0	-0.194614	0.955694	7.9091	0.649502
Tlk1	2:70750435-70786995	36560	3	0	0	|	6	2	1	||	97	130	129	|	87	110	145	||	0	1.90374	0.304123	9.14236	0.036788	||	0	0.0740066	0.961696	9.14236	0.752228
Kbtbd2	6:56789219-56789700	481	1	1	1	|	5	2	2	||	68	105	96	|	75	54	105	||	0	1.89302	0.304123	8.74393	0.0368482	||	0	-0.0792464	0.961696	8.74393	0.72838
Pde5a	3:122747889-122748477	588	3	0	1	|	8	2	1	||	83	89	74	|	55	36	34	||	0	1.75744	0.304296	8.44731	0.0370596	||	0	-0.806502	0.267225	8.44731	0.0133319
Lrch1	14:74775581-74786390	10809	8	3	2	|	3	0	0	||	45	58	48	|	46	36	41	||	0	-1.78668	0.304296	8.11031	0.0372028	||	0	-0.144465	0.947086	8.11031	0.594432
Msrb1	17:24739499-24740194	695	2	0	2	|	0	0	0	||	914	458	495	|	769	322	421	||	0	-7.31842	0.305557	11.0336	0.0375246	||	0	-0.184676	0.961696	11.0336	0.703139
Nhej1	1:74967500-74968912	1412	4	0	0	|	0	0	0	||	22	20	16	|	22	8	16	||	0	-7.25608	0.308617	6.78087	0.0380695	||	0	-0.208416	0.957987	6.78087	0.660449
Bach2	4:32317198-32317304	106	2	2	0	|	0	0	0	||	129	284	277	|	38	6	9	||	0	-7.34043	0.310288	9.07471	0.0384458	||	0	-3.44093	7.84007e-06	9.07471	3.43863e-08
Rn7sk	9:78175353-78175411	58	10	1	4	|	3	0	0	||	7547	6999	7316	|	7280	7518	7191	||	0	-1.97974	0.327896	14.3228	0.0408072	||	0	0.166376	0.961696	14.3228	0.733706
Eprs	1:185386246-185397267	11021	3	0	1	|	10	1	0	||	264	248	284	|	277	340	340	||	0	1.72291	0.328338	10.2875	0.0410709	||	0	0.414483	0.757679	10.2875	0.15825
Pax5	4:44679440-44697687	18247	16	2	1	|	3	0	0	||	82	275	145	|	23	5	2	||	0	-2.22199	0.328338	8.87433	0.0413733	||	0	-3.73533	0.000396288	8.87433	3.69348e-06
Stk39	2:68390914-68410141	19227	0	0	1	|	5	1	0	||	7	3	9	|	14	6	9	||	0	2.78466	0.328338	6.11583	0.0414607	||	0	0.72625	0.826784	6.11583	0.214402
Mylk3	8:85352837-85355567	2730	2	0	0	|	0	5	2	||	70	73	121	|	103	112	273	||	0	2.236	0.328338	9.18331	0.0415823	||	0	0.943493	0.195096	9.18331	0.00735188
Lsm5	6:56703006-56703409	403	2	0	2	|	0	0	0	||	384	118	123	|	299	99	108	||	0	-7.31472	0.330858	9.72157	0.042243	||	0	-0.196275	0.961696	9.72157	0.754793
Top2a	11:98996729-98997919	1190	14	2	3	|	5	0	0	||	769	1278	1111	|	574	678	1524	||	0	-1.57577	0.330858	11.7043	0.0422642	||	0	-0.111299	0.961696	11.7043	0.763364
Ddx17	15:79541034-79542586	1552	12	2	4	|	4	0	1	||	343	514	659	|	343	397	507	||	0	-1.49996	0.333342	10.8326	0.0427642	||	0	-0.126537	0.957987	10.8326	0.662469
Gsap	5:21278045-21281602	3557	8	1	6	|	3	1	0	||	32	31	42	|	22	14	27	||	0	-1.58054	0.33393	7.61381	0.0430228	||	0	-0.61466	0.51896	7.61381	0.0527057
Zcchc11	4:108478873-108479741	868	19	8	9	|	4	4	5	||	40	92	88	|	32	48	34	||	0	-1.08806	0.357589	8.85353	0.046267	||	0	-0.735704	0.395431	8.85353	0.0301343
Chd2	7:73501909-73503514	1605	10	1	1	|	1	0	1	||	60	148	160	|	51	153	140	||	0	-2.1209	0.358589	9.17635	0.0467373	||	0	0.091438	0.981614	9.17635	0.840083
Stip1	19:7026292-7032649	6357	6	0	2	|	0	0	1	||	255	144	166	|	173	103	187	||	0	-2.57773	0.358589	9.59468	0.0467895	||	0	-0.211426	0.944221	9.59468	0.559993
Cntln	4:84971131-85006524	35393	0	1	1	|	1	3	4	||	20	44	6	|	12	31	41	||	0	2.39233	0.360044	7.33993	0.0471769	||	0	0.374841	0.944221	7.33993	0.563211
Fubp3	2:31604614-31605343	729	2	0	0	|	5	0	2	||	29	32	32	|	40	49	47	||	0	2.11493	0.361108	7.79995	0.0475142	||	0	0.694703	0.340492	7.79995	0.0198491
Mctp1	13:76741294-76759820	18526	5	1	4	|	1	0	1	||	52	62	75	|	44	22	60	||	0	-1.98355	0.370246	8.18061	0.0492735	||	0	-0.479222	0.638105	8.18061	0.090958
Tmem26	10:68748376-68751328	2952	7	0	1	|	1	0	0	||	14	11	11	|	8	13	8	||	0	-2.57694	0.370246	6.44631	0.0492854	||	0	-0.154835	0.961696	6.44631	0.76453
Cyfip2	11:46221336-46224205	2869	12	5	3	|	5	0	1	||	65	198	180	|	61	34	92	||	0	-1.43105	0.370246	9.13423	0.0501284	||	0	-1.1085	0.115741	9.13423	0.00304731
Gspt1	16:11230510-11239096	8586	1	0	0	|	1	2	2	||	118	122	116	|	131	93	128	||	0	2.64535	0.370246	9.11367	0.0504233	||	0	0.119692	0.955694	9.11367	0.63639
Evi5	5:107788199-107799260	11061	11	2	2	|	12	4	8	||	84	151	130	|	126	169	241	||	0	1.05146	0.370246	9.72587	0.0504704	||	0	0.687453	0.242982	9.72587	0.0114564
Cbl	9:44146219-44146263	44	0	6	20	|	3	0	4	||	30	86	96	|	35	70	90	||	0	-1.85827	0.370246	8.8111	0.050488	||	0	0.0420879	0.989186	8.8111	0.954523
Pappa	4:65155617-65156679	1062	2	0	0	|	7	0	1	||	20	10	13	|	40	28	17	||	0	2.24231	0.370246	7.19429	0.0518447	||	0	1.14666	0.485219	7.19429	0.0453824
Vac14	8:110632030-110637033	5003	1	0	0	|	3	1	1	||	34	34	48	|	39	36	43	||	0	2.61862	0.370246	7.75937	0.0524249	||	0	0.164668	0.944221	7.75937	0.562273
Tmem161b	13:84251230-84260240	9010	5	1	4	|	1	1	0	||	43	43	47	|	49	34	32	||	0	-1.98332	0.370246	7.94349	0.0525801	||	0	-0.0425808	0.985324	7.94349	0.896908
Phip	9:82940859-82943071	2212	2	0	0	|	2	4	1	||	12	34	31	|	10	36	38	||	0	2.23431	0.370246	7.36219	0.0529362	||	0	0.284979	0.944221	7.36219	0.579674
Fam126a	5:23979488-24000019	20531	6	1	3	|	0	1	1	||	113	151	164	|	95	133	203	||	0	-1.95622	0.370246	9.3818	0.0532879	||	0	0.123131	0.955694	9.3818	0.632268
Cdc73	1:143667625-143677855	10230	1	1	0	|	6	1	0	||	28	66	64	|	44	50	58	||	0	2.07879	0.370246	8.12809	0.0534242	||	0	0.113777	0.961696	8.12809	0.708425
Rhot1	11:80250208-80251126	918	3	2	2	|	1	0	0	||	57	67	59	|	60	47	57	||	0	-2.46909	0.370246	8.2654	0.0539162	||	0	-0.0135784	0.989186	8.2654	0.956528
Prim2	1:33480458-33533363	52905	1	0	0	|	2	2	1	||	264	173	200	|	238	131	286	||	0	2.64475	0.370246	9.84172	0.0549253	||	0	0.1096	0.961696	9.84172	0.742662
Nhlrc2	19:56574817-56576284	1467	5	1	1	|	1	0	0	||	63	92	85	|	72	62	90	||	0	-2.45094	0.370246	8.5997	0.0549925	||	0	0.0376061	0.982691	8.5997	0.863155
Foxo3	10:42196466-42197901	1435	0	1	0	|	0	3	2	||	86	172	141	|	82	66	261	||	0	2.67993	0.370246	9.20608	0.0550203	||	0	0.0698892	0.982691	9.20608	0.860534
Cdk12	11:98263470-98267858	4388	23	4	3	|	8	1	2	||	30	39	34	|	24	37	38	||	0	-1.0679	0.370246	8.23855	0.0551933	||	0	0.0850123	0.96861	8.23855	0.793368
Ddx52	11:83948445-83949694	1249	4	3	0	|	1	0	0	||	44	89	78	|	92	81	94	||	0	-2.46316	0.370246	8.65065	0.0563161	||	0	0.513178	0.527611	8.65065	0.0562834
Smad4	18:73675161-73678039	2878	5	4	1	|	1	1	0	||	50	84	54	|	63	46	31	||	0	-1.99629	0.370246	8.26819	0.0572444	||	0	-0.20648	0.944221	8.26819	0.585847
Zdhhc20	14:57856610-57865641	9031	4	1	2	|	1	0	0	||	57	70	68	|	79	52	58	||	0	-2.45863	0.370246	8.39285	0.057304	||	0	0.120955	0.960131	8.39285	0.67009
Ranbp10	8:105773909-105774643	734	1	0	0	|	2	2	1	||	97	203	171	|	80	152	340	||	0	2.65379	0.370246	9.52639	0.0573346	||	0	0.348439	0.927982	9.52639	0.372545
Cse1l	2:166941218-166941492	274	4	2	1	|	1	0	0	||	198	229	229	|	199	120	192	||	0	-2.46139	0.370246	9.72385	0.0574496	||	0	-0.222804	0.940307	9.72385	0.401959
Arhgap26	18:39097630-39111900	14270	1	0	0	|	3	2	0	||	18	47	36	|	33	41	30	||	0	2.61968	0.370246	7.60416	0.0579343	||	0	0.252325	0.944221	7.60416	0.514472
Taf5	19:47074813-47076132	1319	5	0	2	|	0	1	0	||	27	36	42	|	25	34	51	||	0	-2.43347	0.370246	7.67435	0.0588	||	0	0.185465	0.944221	7.67435	0.522552
Dpy19l1	9:24473774-24485729	11955	7	1	2	|	2	0	0	||	57	39	57	|	110	69	71	||	0	-1.96767	0.370246	8.53263	0.0591555	||	0	0.864449	0.294327	8.53263	0.0154641
Atxn1	13:45795509-45956575	161066	6	1	0	|	1	0	0	||	29	28	35	|	28	22	28	||	0	-2.43474	0.370246	7.41731	0.0592329	||	0	-0.101494	0.961696	7.41731	0.747463
Ebf1	11:44618194-44643469	25275	6	2	0	|	1	0	0	||	124	429	282	|	64	20	19	||	0	-2.60287	0.370246	9.40308	0.0598189	||	0	-2.74068	0.000390328	9.40308	3.42393e-06
Eps15l1	8:72367904-72380306	12402	10	0	4	|	11	3	8	||	74	87	94	|	66	45	113	||	0	1.01809	0.370246	9.00642	0.0611332	||	0	-0.0997555	0.961696	9.00642	0.708796
Pum1	4:130718154-130728164	10010	0	2	1	|	0	0	0	||	78	147	157	|	88	126	217	||	0	-6.94779	0.370246	9.21171	0.0611466	||	0	0.288307	0.903988	9.21171	0.342693
Zranb1	7:132948044-132966694	18650	1	2	0	|	0	0	0	||	71	54	65	|	65	63	78	||	0	-6.92189	0.370246	8.36207	0.0617789	||	0	0.2379	0.927982	8.36207	0.371356
Sltm	9:70559037-70562861	3824	7	3	4	|	3	0	1	||	75	125	90	|	101	96	93	||	0	-1.49308	0.370246	9.01286	0.0619087	||	0	0.180004	0.944221	9.01286	0.507628
Tdp2	13:24836016-24840558	4542	1	2	0	|	0	0	0	||	85	65	95	|	85	63	94	||	0	-6.92314	0.370246	8.6112	0.0619309	||	0	0.101472	0.961696	8.6112	0.708516
Ccdc125	13:100679317-100687191	7874	2	1	0	|	0	0	0	||	47	79	68	|	48	40	64	||	0	-6.90921	0.370246	8.1618	0.0619689	||	0	-0.216782	0.916267	8.1618	0.355574
Blvra	2:127080530-127086082	5552	3	2	2	|	1	0	0	||	188	90	123	|	197	110	155	||	0	-2.49626	0.370246	9.3978	0.0620014	||	0	0.306724	0.944221	9.3978	0.436705
Gsk3a	7:25233574-25233911	337	1	1	1	|	0	0	0	||	95	117	140	|	89	53	153	||	0	-6.92206	0.370246	8.92378	0.0623471	||	0	-0.174278	0.944221	8.92378	0.536507
Pias1	9:62902759-62920548	17789	1	2	0	|	0	0	0	||	120	187	91	|	89	83	107	||	0	-6.92676	0.370246	9.00531	0.0623782	||	0	-0.368151	0.831291	9.00531	0.218038
Ralgapa2	2:146387228-146412868	25640	1	0	2	|	0	0	0	||	33	41	42	|	19	34	32	||	0	-6.91868	0.370246	7.51475	0.0623994	||	0	-0.30103	0.906904	7.51475	0.348044
Cers6	2:69068629-69071438	2809	3	0	0	|	0	0	0	||	53	71	77	|	52	53	68	||	0	-6.90105	0.370246	8.2677	0.0624475	||	0	-0.0770984	0.961696	8.2677	0.732372
Fto	8:91468317-91485278	16961	2	0	1	|	0	0	0	||	38	62	57	|	46	33	48	||	0	-6.90661	0.370246	7.92639	0.0624642	||	0	-0.158781	0.944221	7.92639	0.545842
Foxp1	6:99003200-99010057	6857	4	2	1	|	0	0	1	||	77	181	105	|	32	24	25	||	0	-2.43969	0.370246	8.51474	0.0625348	||	0	-1.96542	3.94564e-06	8.51474	1.29791e-08
Tnrc6b	15:80747406-80784806	37400	2	1	0	|	0	0	0	||	79	147	111	|	67	56	112	||	0	-6.90759	0.370246	8.76955	0.062671	||	0	-0.400907	0.698731	8.76955	0.109177
Rnf216	5:143080224-143087621	7397	1	0	2	|	0	0	0	||	51	129	109	|	58	73	88	||	0	-6.91979	0.370246	8.63324	0.0627244	||	0	-0.228738	0.944221	8.63324	0.444705
Gtf2h1	7:46814116-46815417	1301	2	1	0	|	0	0	0	||	81	89	104	|	116	125	127	||	0	-6.90736	0.370246	8.96633	0.0627713	||	0	0.583019	0.340492	8.96633	0.0205436
Ranbp9	13:43419576-43425214	5638	2	0	1	|	0	0	0	||	75	120	110	|	55	74	123	||	0	-6.9054	0.370246	8.74187	0.0628564	||	0	-0.162137	0.944221	8.74187	0.52052
Gatad2a	8:69935779-69936036	257	2	0	1	|	0	0	0	||	82	84	87	|	74	45	113	||	0	-6.90511	0.370246	8.57908	0.0629503	||	0	-0.0399181	0.982817	8.57908	0.878285
Rhot1	11:80223903-80227332	3429	2	1	0	|	0	0	0	||	86	86	79	|	73	71	69	||	0	-6.90694	0.370246	8.55794	0.0629541	||	0	-0.0844932	0.961696	8.55794	0.753325
Ulk2	11:61787429-61791583	4154	3	0	0	|	0	0	0	||	45	53	43	|	30	27	49	||	0	-6.89781	0.370246	7.75011	0.0629704	||	0	-0.30101	0.871411	7.75011	0.258461
Atxn1	13:45697821-45956575	258754	2	1	0	|	0	0	0	||	16	22	28	|	14	17	21	||	0	-6.90682	0.370246	6.88531	0.0630073	||	0	-0.204537	0.944221	6.88531	0.562276
Dennd1a	2:38126529-38136975	10446	2	1	0	|	0	0	0	||	43	96	100	|	60	48	92	||	0	-6.90617	0.370246	8.44265	0.0633	||	0	-0.120504	0.960131	8.44265	0.673206
Nupl1	14:60239481-60247466	7985	3	0	0	|	0	0	0	||	99	109	113	|	111	78	120	||	0	-6.89565	0.370246	8.92104	0.0633209	||	0	0.0755647	0.961696	8.92104	0.749423
Dis3l	9:64329433-64330915	1482	2	1	0	|	0	0	0	||	15	24	16	|	26	17	25	||	0	-6.90581	0.370246	6.9437	0.0634601	||	0	0.443464	0.833137	6.9437	0.223034
Son	16:91664198-91664822	624	2	0	1	|	0	0	0	||	161	301	277	|	171	198	267	||	0	-6.9035	0.370246	9.86673	0.0634746	||	0	-0.0643853	0.971579	9.86673	0.80581
Gtf2h1	7:46808537-46808879	342	2	1	0	|	0	0	0	||	114	139	124	|	141	156	131	||	0	-6.90558	0.370246	9.2512	0.0635637	||	0	0.361965	0.79892	9.2512	0.199292
Mertk	2:128776286-128779872	3586	1	0	2	|	0	0	0	||	36	20	34	|	44	41	39	||	0	-6.92263	0.370246	7.62327	0.0635958	||	0	0.600176	0.70045	7.62327	0.112069
Bub1b	2:118622135-118623185	1050	2	0	1	|	0	0	0	||	207	302	340	|	211	218	441	||	0	-6.90284	0.370246	10.1287	0.0636923	||	0	0.131025	0.955588	10.1287	0.626013
Supt3	17:45033238-45048392	15154	1	1	1	|	0	0	0	||	31	33	25	|	37	16	23	||	0	-6.92935	0.370246	7.29346	0.0637339	||	0	-0.0777912	0.982691	7.29346	0.850177
Nfatc3	8:106099072-106100989	1917	3	0	0	|	0	0	0	||	91	152	107	|	55	58	110	||	0	-6.89311	0.370246	8.77005	0.0637382	||	0	-0.541672	0.415798	8.77005	0.03351
Fam169b	7:68300833-68304651	3818	1	0	2	|	0	0	0	||	15	23	13	|	3	4	1	||	0	-6.92414	0.370246	6.15499	0.0640798	||	0	-2.41374	0.00225404	6.15499	2.71869e-05
Mapkap1	2:34432003-34435222	3219	3	0	0	|	0	0	0	||	99	113	84	|	70	41	78	||	0	-6.89101	0.370246	8.58549	0.0640852	||	0	-0.5322	0.504966	8.58549	0.0493153
Ick	9:78131295-78141273	9978	2	1	0	|	0	0	0	||	8	10	15	|	12	8	10	||	0	-6.90432	0.370246	6.22814	0.0641383	||	0	0.0094159	0.99602	6.22814	0.984006
Snx13	12:35078900-35086984	8084	10	2	2	|	1	2	1	||	48	73	73	|	46	33	61	||	0	-1.44478	0.370246	8.34478	0.0642711	||	0	-0.34179	0.757679	8.34478	0.159096
Mcu	10:59599928-59600693	765	3	0	0	|	0	0	0	||	17	26	27	|	12	16	27	||	0	-6.88917	0.370246	6.93843	0.06439	||	0	-0.228571	0.944221	6.93843	0.518928
Tbc1d5	17:50782261-50800195	17934	2	0	1	|	0	0	0	||	18	32	34	|	24	34	26	||	0	-6.89995	0.370246	7.3098	0.06466	||	0	0.184197	0.955356	7.3098	0.619479
Trim35	14:66303181-66304235	1054	2	0	1	|	0	0	0	||	35	43	56	|	48	51	35	||	0	-6.89988	0.370246	7.88657	0.0646831	||	0	0.196861	0.944221	7.88657	0.570363
Arhgef7	8:11785713-11800868	15155	3	0	0	|	0	0	0	||	63	62	46	|	53	40	48	||	0	-6.88741	0.370246	8.06208	0.0646852	||	0	-0.14157	0.955694	8.06208	0.640111
Sgk3	1:9865131-9872333	7202	3	0	0	|	0	0	0	||	123	109	127	|	119	80	201	||	0	-6.88734	0.370246	9.13404	0.0646961	||	0	0.222049	0.944221	9.13404	0.421557
Ctps2	X:162941647-162941844	197	3	0	0	|	0	0	0	||	68	87	89	|	84	48	61	||	0	-6.8868	0.370246	8.47046	0.0647871	||	0	-0.172075	0.944221	8.47046	0.557169
Rnf138	18:21010677-21020999	10322	2	1	0	|	0	0	0	||	33	28	33	|	51	36	32	||	0	-6.90275	0.370246	7.61709	0.0648658	||	0	0.505608	0.773293	7.61709	0.175516
Asxl1	2:153352189-153357178	4989	10	2	2	|	2	1	1	||	45	64	52	|	38	55	68	||	0	-1.44989	0.370246	8.31678	0.0648991	||	0	0.130911	0.949762	8.31678	0.608299
Rnf121	7:102023312-102023413	101	2	0	1	|	0	0	0	||	45	38	32	|	40	23	30	||	0	-6.89909	0.370246	7.57139	0.0649513	||	0	-0.171716	0.955694	7.57139	0.640576
Sugp2	8:70251614-70252101	487	2	1	0	|	0	0	0	||	21	46	36	|	17	31	56	||	0	-6.90227	0.370246	7.51973	0.0650949	||	0	0.1184	0.961696	7.51973	0.756073
Vrk2	11:26534211-26550075	15864	22	2	1	|	4	1	1	||	306	151	106	|	197	99	209	||	0	-1.52946	0.370246	9.83622	0.0651233	||	0	-0.117484	0.975877	9.83622	0.827568
Srpk2	5:23540375-23548563	8188	2	1	0	|	0	0	0	||	43	94	71	|	38	83	65	||	0	-6.90205	0.370246	8.3388	0.0651983	||	0	0.0334509	0.987924	8.3388	0.926076
Atad2	15:58116768-58122602	5834	6	1	5	|	2	0	1	||	194	312	351	|	189	265	534	||	0	-1.67502	0.370246	10.295	0.0653486	||	0	0.291318	0.916267	10.295	0.356661
Ilkap	1:91376318-91381972	5654	2	0	1	|	0	0	0	||	337	206	213	|	284	184	249	||	0	-6.89576	0.370246	9.99644	0.0660989	||	0	0.0305499	0.988023	9.99644	0.931943
Hdac4	1:92148256-92148494	238	3	0	0	|	0	0	0	||	18	22	33	|	16	21	18	||	0	-6.87826	0.370246	6.98593	0.0662395	||	0	-0.241824	0.944221	6.98593	0.538268
Vps13b	15:35445570-35448721	3151	2	1	0	|	0	0	0	||	139	437	326	|	117	199	299	||	0	-6.89955	0.370246	9.95901	0.0664148	||	0	-0.405091	0.878017	9.95901	0.287562
Prkce	17:86488160-86496111	7951	9	1	5	|	2	0	2	||	31	78	36	|	18	10	13	||	0	-1.53675	0.370246	7.7038	0.0665793	||	0	-1.62737	0.0100617	7.7038	0.000154456
Chd2	7:73490479-73491424	945	3	0	0	|	0	0	0	||	83	121	139	|	57	128	161	||	0	-6.87504	0.370246	9.01513	0.0667973	||	0	0.139788	0.960131	9.01513	0.676719
Dock7	4:99049559-99049672	113	2	1	0	|	0	0	0	||	4	7	2	|	5	13	12	||	0	-6.89808	0.370246	5.87984	0.0671532	||	0	1.2977	0.387	5.87984	0.0282187
Usp30	5:114102383-114103826	1443	3	0	0	|	0	0	0	||	11	15	12	|	14	16	11	||	0	-6.87279	0.370246	6.47078	0.0671899	||	0	0.277416	0.944221	6.47078	0.541819
Abca1	4:53127597-53133015	5418	3	0	0	|	0	0	0	||	58	53	76	|	76	90	55	||	0	-6.87259	0.370246	8.42036	0.0672255	||	0	0.439766	0.831291	8.42036	0.219026
Baz1b	5:135236275-135238066	1791	3	0	0	|	0	0	0	||	111	205	225	|	106	141	322	||	0	-6.87201	0.370246	9.57363	0.0673271	||	0	0.152322	0.957698	9.57363	0.655914
Ikzf1	11:11748311-11761353	13042	8	3	1	|	0	1	2	||	264	429	357	|	189	143	281	||	0	-1.62026	0.370246	10.1769	0.0676887	||	0	-0.658122	0.235704	10.1769	0.0106882
Tcf4	18:69564034-69564684	650	3	0	0	|	0	0	0	||	25	44	50	|	31	28	19	||	0	-6.86946	0.370246	7.49281	0.0677767	||	0	-0.394296	0.895009	7.49281	0.323361
Fam3c	6:22339273-22343319	4046	3	0	0	|	0	0	0	||	33	34	37	|	33	21	17	||	0	-6.86913	0.370246	7.36337	0.0678355	||	0	-0.367053	0.922189	7.36337	0.36655
Zfp277	12:40363134-40378874	15740	2	0	1	|	0	0	0	||	45	43	35	|	62	32	25	||	0	-6.89035	0.370246	7.77448	0.0680289	||	0	0.141639	0.961696	7.77448	0.751609
Ube2v2	16:15577015-15581207	4192	3	0	0	|	0	0	0	||	88	51	50	|	72	37	54	||	0	-6.86247	0.370246	8.22399	0.0690287	||	0	-0.105461	0.96861	8.22399	0.793052
Spc24	9:21757117-21757390	273	13	7	4	|	7	1	0	||	324	174	170	|	331	95	205	||	0	-1.3743	0.370246	10.0853	0.0695428	||	0	0.011709	0.994073	10.0853	0.980993
Snx13	12:35085939-35107556	21617	2	1	7	|	5	6	6	||	65	81	84	|	46	55	89	||	0	1.09628	0.370246	8.75932	0.0695898	||	0	-0.164004	0.944221	8.75932	0.514476
Pten	19:32792549-32800099	7550	12	3	3	|	5	0	1	||	165	196	233	|	115	88	118	||	0	-1.24987	0.370246	9.57387	0.0697509	||	0	-0.737884	0.133081	9.57387	0.0040412
Tmem50a	4:134909613-134913195	3582	3	0	0	|	0	0	0	||	379	204	302	|	457	215	329	||	0	-6.85551	0.370246	10.3022	0.0703029	||	0	0.292273	0.944221	10.3022	0.472192
Arhgap26	18:39120119-39150118	29999	8	4	0	|	2	1	0	||	25	64	42	|	37	56	45	||	0	-1.64928	0.370246	8.07337	0.071458	||	0	0.273972	0.944221	8.07337	0.452396
Map3k3	11:106096991-106123906	26915	0	0	0	|	0	0	2	||	65	77	89	|	56	63	87	||	0	6.66416	0.370246	8.44928	0.0717512	||	0	-0.0378549	0.982691	8.44928	0.864746
Ehmt1	2:24813527-24863908	50381	0	0	0	|	0	2	0	||	48	75	71	|	47	47	66	||	0	6.66334	0.370246	8.18202	0.071756	||	0	-0.140998	0.944221	8.18202	0.537188
Auh	13:52887241-52898736	11495	0	0	0	|	0	2	0	||	81	68	94	|	79	59	102	||	0	6.6682	0.370246	8.58004	0.0719785	||	0	0.0906131	0.961696	8.58004	0.721261
Dock8	19:25061108-25065459	4351	11	0	3	|	4	0	0	||	251	390	329	|	172	121	249	||	0	-1.45009	0.370246	10.0775	0.0721013	||	0	-0.725081	0.195096	10.0775	0.00738027
Pank1	19:34840757-34841109	352	3	0	0	|	0	0	0	||	4	8	13	|	6	4	2	||	0	-6.84585	0.370246	5.743	0.0721165	||	0	-0.82649	0.793567	5.743	0.194911
Iqgap2	13:95661587-95673756	12169	0	0	0	|	0	0	2	||	73	111	93	|	83	71	190	||	0	6.67405	0.370246	8.8598	0.0721619	||	0	0.382201	0.773293	8.8598	0.178524
Ice2	9:69407117-69410889	3772	0	0	0	|	0	0	2	||	25	29	32	|	18	30	26	||	0	6.67566	0.370246	7.23159	0.072231	||	0	-0.0644392	0.982691	7.23159	0.854604
Gm340	19:41581778-41586716	4938	0	0	0	|	0	2	0	||	18	33	38	|	22	31	45	||	0	6.67356	0.370246	7.39644	0.0722324	||	0	0.268657	0.944221	7.39644	0.422075
Ralgapa2	2:146340379-146342749	2370	0	0	0	|	0	0	2	||	19	41	34	|	14	21	36	||	0	6.67943	0.370246	7.23372	0.0723956	||	0	-0.282487	0.944221	7.23372	0.446014
Vps13d	4:145154569-145156782	2213	0	0	0	|	0	1	1	||	68	132	142	|	58	89	157	||	0	6.6787	0.370246	8.9075	0.0724223	||	0	-0.0583133	0.982691	8.9075	0.853473
Kif11	19:37390779-37390850	71	0	0	0	|	0	0	2	||	394	747	711	|	396	487	868	||	0	6.68186	0.370246	11.03	0.0725039	||	0	0.0342716	0.987888	11.03	0.913425
Flna	X:74227665-74228828	1163	1	0	3	|	9	1	0	||	405	516	658	|	386	361	705	||	0	1.55092	0.370246	10.8868	0.0726809	||	0	-0.0208631	0.988023	10.8868	0.944021
Acox1	11:116180943-116182020	1077	0	0	0	|	1	0	1	||	56	49	48	|	55	42	62	||	0	6.65606	0.370246	8.04556	0.0727093	||	0	0.173445	0.944221	8.04556	0.514477
Xpnpep3	15:81430690-81438180	7490	0	0	0	|	1	1	0	||	17	20	20	|	18	13	19	||	0	6.65579	0.370246	6.75981	0.0728935	||	0	-0.0567578	0.982691	6.75981	0.872568
Fam126a	5:23979488-23991837	12349	10	2	6	|	3	2	1	||	158	194	228	|	137	178	284	||	0	-1.24192	0.370246	9.86627	0.0729753	||	0	0.153562	0.944221	9.86627	0.55157
Dym	18:75080203-75126919	46716	0	0	0	|	2	0	0	||	62	83	76	|	73	47	94	||	0	6.64683	0.370246	8.43596	0.0730357	||	0	0.0712411	0.961696	8.43596	0.757544
Fgd6	10:94089577-94089762	185	0	0	0	|	1	1	0	||	16	27	21	|	29	26	27	||	0	6.6558	0.370246	7.12797	0.0732018	||	0	0.513111	0.731098	7.12797	0.132895
Deptor	15:55208731-55218273	9542	0	0	0	|	1	1	0	||	9	11	9	|	11	13	12	||	0	6.6558	0.370246	6.23898	0.0734058	||	0	0.445712	0.884914	6.23898	0.305354
Sema4b	7:80215624-80217099	1475	0	0	0	|	2	0	0	||	100	111	97	|	62	42	93	||	0	6.64478	0.370246	8.615	0.0734131	||	0	-0.548067	0.378507	8.615	0.0246943
Fer	17:63921613-63924178	2565	0	0	0	|	2	0	0	||	32	48	32	|	35	37	47	||	0	6.6447	0.370246	7.66636	0.0734287	||	0	0.222852	0.944221	7.66636	0.425336
Nap1l4	7:143524161-143527311	3150	0	0	0	|	1	0	1	||	415	361	363	|	411	372	528	||	0	6.65623	0.370246	10.5997	0.0734563	||	0	0.312982	0.857679	10.5997	0.249207
Zfp871	17:32773505-32777527	4022	0	0	0	|	2	0	0	||	65	114	112	|	76	71	87	||	0	6.64439	0.370246	8.67318	0.0734863	||	0	-0.152449	0.944221	8.67318	0.532913
Pigf	17:87008803-87023913	15110	3	0	0	|	0	0	0	||	39	22	21	|	25	15	12	||	0	-6.83785	0.370246	7.06463	0.0736606	||	0	-0.506012	0.903988	7.06463	0.339779
Gsap	5:21222390-21226833	4443	0	0	0	|	2	0	0	||	35	69	63	|	43	35	49	||	0	6.64343	0.370246	7.94706	0.073663	||	0	-0.240046	0.934146	7.94706	0.383958
Tank	2:61613651-61627839	14188	3	2	4	|	2	0	0	||	187	165	150	|	185	85	187	||	0	-1.89094	0.370246	9.52306	0.0737964	||	0	-0.0390442	0.985671	9.52306	0.90483
Atf6	1:170787346-170794770	7424	0	0	0	|	2	0	0	||	112	157	117	|	88	105	108	||	0	6.64246	0.370246	9.01912	0.0738429	||	0	-0.201308	0.944221	9.01912	0.4252
Mapk1	16:17015898-17018475	2577	12	2	4	|	5	0	1	||	275	272	296	|	280	213	285	||	0	-1.24715	0.370246	10.2457	0.0739473	||	0	0.0217433	0.988023	10.2457	0.934911
Ccdc171	4:83535790-83554884	19094	0	0	0	|	2	0	0	||	16	27	24	|	10	9	14	||	0	6.64189	0.370246	6.66692	0.0739504	||	0	-0.875611	0.340492	6.66692	0.0196491
Khk	5:30929542-30929610	68	0	0	0	|	0	2	0	||	57	35	27	|	112	46	47	||	0	6.71269	0.370246	8.14355	0.074379	||	0	0.9322	0.590758	8.14355	0.0702821
Usp3	9:66540062-66547955	7893	0	0	0	|	2	0	0	||	103	146	115	|	100	93	82	||	0	6.6386	0.370246	8.93677	0.0745679	||	0	-0.220598	0.944221	8.93677	0.436075
Prdm2	4:143170036-143194734	24698	0	0	0	|	2	0	0	||	8	9	8	|	10	8	10	||	0	6.6382	0.370246	6.03404	0.0746424	||	0	0.289252	0.944221	6.03404	0.533069
Fndc3a	14:72563484-72584844	21360	0	0	0	|	2	0	0	||	37	53	51	|	39	53	40	||	0	6.63811	0.370246	7.88447	0.0746595	||	0	0.0856832	0.967661	7.88447	0.785571
Atp6v1h	1:5093363-5133262	39899	0	0	0	|	2	0	0	||	101	87	83	|	91	81	77	||	0	6.63727	0.370246	8.69566	0.0748182	||	0	0.0292565	0.987924	8.69566	0.921597
Mtdh	15:34114024-34123766	9742	0	0	0	|	2	0	0	||	121	176	158	|	157	134	124	||	0	6.6371	0.370246	9.32496	0.0748505	||	0	0.0571308	0.982691	9.32496	0.842505
Tshz2	2:169883526-169886459	2933	0	0	0	|	0	2	0	||	2	2	2	|	4	7	1	||	0	6.72373	0.370246	5.21891	0.0750933	||	0	1.12215	0.773269	5.21891	0.17145
Chmp3	6:71574115-71579836	5721	0	0	0	|	2	0	0	||	209	202	177	|	219	134	185	||	0	6.63475	0.370246	9.64495	0.0752977	||	0	0.00919825	0.992431	9.64495	0.975564
Rab10	12:3252612-3264749	12137	0	0	0	|	2	0	0	||	319	238	282	|	229	160	347	||	0	6.63475	0.370246	10.0364	0.0752985	||	0	-0.123347	0.960131	10.0364	0.677813
Atp6v1c1	15:38679320-38681165	1845	0	0	0	|	2	0	0	||	113	126	106	|	153	88	104	||	0	6.63359	0.370246	9.04417	0.0755207	||	0	0.164333	0.949762	9.04417	0.602557
Hdgfl3	7:81893799-81905636	11837	0	1	0	|	4	1	0	||	3	4	4	|	8	11	4	||	0	2.52816	0.370246	5.81463	0.0755232	||	0	1.21246	0.547851	5.81463	0.0612636
Lrmp	6:145147636-145149357	1721	5	2	0	|	1	0	0	||	514	566	558	|	347	74	303	||	0	-2.43467	0.370246	10.5516	0.0757138	||	0	-1.07728	0.339606	10.5516	0.0191773
Xrcc4	13:89991073-90001084	10011	0	0	0	|	2	0	0	||	31	29	44	|	30	13	22	||	0	6.6287	0.37292	7.28686	0.0764649	||	0	-0.530885	0.779169	7.28686	0.181863
Lrch3	16:32981828-32988481	6653	6	2	1	|	2	0	0	||	37	71	66	|	33	49	51	||	0	-1.83055	0.372931	8.14423	0.0768137	||	0	-0.224885	0.944221	8.14423	0.43621
Cpq	15:33249926-33302547	52621	0	0	0	|	1	0	1	||	49	35	33	|	52	34	20	||	0	6.657	0.372931	7.66659	0.0770073	||	0	0.044464	0.987924	7.66659	0.926179
Chd2	7:73514090-73519708	5618	8	3	1	|	2	1	0	||	63	146	143	|	63	141	149	||	0	-1.64269	0.372931	9.17894	0.0770805	||	0	0.174988	0.955694	9.17894	0.634442
Ep300	15:81628293-81628737	444	2	0	1	|	6	2	0	||	69	166	133	|	54	68	140	||	0	1.70461	0.379578	8.96936	0.0786625	||	0	-0.381899	0.856165	8.96936	0.242296
Kansl1l	1:66801049-66802168	1119	12	3	3	|	3	1	2	||	82	120	101	|	45	23	31	||	0	-1.21936	0.37996	8.64235	0.0796046	||	0	-1.44574	0.000185238	8.64235	1.42178e-06
Mir99ahg	16:77594622-77596959	2337	0	0	0	|	2	0	0	||	4	3	6	|	8	3	3	||	0	6.61297	0.37996	5.47291	0.0796159	||	0	0.254579	0.961696	5.47291	0.702455
Erdr1	Y:90793296-90793417	121	11	5	4	|	4	2	0	||	301	916	294	|	291	608	296	||	0	-1.43881	0.37996	10.8566	0.0797536	||	0	-0.0685379	0.984861	10.8566	0.890911
Rps25	9:44408770-44410052	1282	3	0	0	|	0	0	0	||	4154	1992	2161	|	4630	2552	2346	||	0	-6.80807	0.37996	13.1477	0.0797636	||	0	0.33452	0.944221	13.1477	0.563188
Pias1	9:62912750-62923655	10905	7	1	1	|	2	0	0	||	99	139	80	|	63	55	76	||	0	-1.8153	0.37996	8.75259	0.0797995	||	0	-0.577661	0.430499	8.75259	0.0351669
Smchd1	17:71436706-71448846	12140	2	0	0	|	1	3	2	||	125	192	213	|	123	152	213	||	0	1.94171	0.37996	9.55181	0.0799915	||	0	0.0176854	0.988023	9.55181	0.944859
Exoc6	19:37570383-37573757	3374	5	1	3	|	1	0	1	||	321	309	235	|	236	193	287	||	0	-1.82411	0.382084	10.1214	0.0806482	||	0	-0.163159	0.944221	10.1214	0.555731
Senp6	9:80087430-80103764	16334	6	3	6	|	4	1	0	||	73	101	78	|	68	82	81	||	0	-1.29098	0.382627	8.82591	0.0809726	||	0	0.0327092	0.985324	8.82591	0.899047
Ppil4	10:7798467-7810458	11991	2	0	0	|	2	3	1	||	110	126	106	|	88	114	148	||	0	1.92161	0.384365	9.09738	0.0815511	||	0	0.153851	0.944221	9.09738	0.52222
not_annotated	X:101462940-101464787	1847	0	0	1	|	2	3	0	||	0	8	6	|	0	2	4	||	0	2.6095	0.385297	5.42293	0.0820091	||	0	-1.00417	0.856165	5.42293	0.240095
Rab22a	2:173688147-173695999	7852	2	0	0	|	3	2	1	||	45	43	56	|	50	41	74	||	0	1.90711	0.385297	8.11373	0.0821714	||	0	0.305074	0.831291	8.11373	0.216701
Tmem245	4:56906215-56912130	5915	11	6	2	|	7	0	0	||	48	60	60	|	41	32	29	||	0	-1.15453	0.386931	8.26139	0.0828666	||	0	-0.545622	0.608845	8.26139	0.0798235
Creb1	1:64550849-64576329	25480	5	1	3	|	0	0	2	||	120	148	142	|	115	74	86	||	0	-1.80688	0.386931	9.11982	0.082944	||	0	-0.407614	0.753234	9.11982	0.148252
Bmp2k	5:97027831-97045167	17336	2	0	0	|	3	1	2	||	98	114	114	|	82	89	177	||	0	1.91086	0.388888	9.04307	0.0835768	||	0	0.178709	0.944221	9.04307	0.46438
Fbxw8	5:118092496-118095729	3233	1	1	0	|	3	0	3	||	48	44	49	|	62	61	76	||	0	1.89741	0.389847	8.25115	0.0839967	||	0	0.624478	0.235704	8.25115	0.010984
Ankrd12	17:66037493-66053091	15598	10	2	3	|	3	1	1	||	52	68	65	|	37	38	60	||	0	-1.24337	0.393285	8.33141	0.0849531	||	0	-0.331897	0.750369	8.33141	0.147276
Cpsf6	10:117355935-117367988	12053	0	2	0	|	1	3	2	||	155	211	221	|	142	159	175	||	0	1.90776	0.393416	9.62182	0.085197	||	0	-0.141886	0.944221	9.62182	0.569697
Aftph	11:20725685-20727639	1954	4	1	2	|	8	4	1	||	98	117	145	|	107	90	103	||	0	1.2051	0.393611	9.18188	0.0854549	||	0	-0.101664	0.961696	9.18188	0.691159
Sorl1	9:42057271-42072346	15075	6	1	2	|	1	1	0	||	73	151	135	|	40	61	117	||	0	-1.80517	0.397504	8.86311	0.0866367	||	0	-0.614077	0.51896	8.86311	0.0532048
Rrnad1	3:87926731-87928048	1317	1	1	0	|	4	0	2	||	37	35	37	|	24	17	29	||	0	1.8868	0.397504	7.47069	0.086736	||	0	-0.518327	0.609698	7.47069	0.0815604
Pibf1	14:99133236-99150741	17505	1	0	1	|	3	0	3	||	20	49	39	|	28	35	41	||	0	1.89999	0.40569	7.66302	0.0887447	||	0	0.105994	0.961696	7.66302	0.746231
Prkcb	7:122516829-122518179	1350	8	0	1	|	2	0	0	||	118	201	191	|	66	31	95	||	0	-1.78843	0.408902	9.09229	0.0896715	||	0	-1.30213	0.00310442	9.09229	4.25497e-05
Rnf38	4:44133640-44137661	4021	1	2	3	|	1	0	0	||	39	99	74	|	34	68	102	||	0	-2.30393	0.412146	8.4343	0.0906089	||	0	0.0734424	0.980863	8.4343	0.838581
Mapkap1	2:34435133-34444406	9273	7	3	1	|	1	0	2	||	127	119	106	|	83	54	91	||	0	-1.5183	0.413236	8.95039	0.0916816	||	0	-0.514139	0.527611	8.95039	0.0564058
Amfr	8:93999098-94000469	1371	3	3	0	|	1	0	0	||	124	102	136	|	153	134	211	||	0	-2.24853	0.413236	9.35542	0.0926202	||	0	0.566002	0.381627	9.35542	0.0269901
Vrk1	12:106036540-106042892	6352	1	3	2	|	0	0	1	||	235	183	235	|	291	186	290	||	0	-2.27018	0.413236	9.97754	0.0926256	||	0	0.349623	0.856165	9.97754	0.241728
Usp3	9:66540062-66566903	26841	18	10	11	|	8	3	7	||	60	109	90	|	71	76	77	||	0	-0.79509	0.413236	9.33161	0.0926313	||	0	-0.0337772	0.985324	9.33161	0.900829
Usf3	16:44200614-44205080	4466	5	1	0	|	1	0	0	||	65	79	69	|	60	47	80	||	0	-2.22623	0.413236	8.40371	0.0927895	||	0	-0.0683541	0.961696	8.40371	0.758711
Ankrd12	17:66024076-66053091	29015	10	2	3	|	3	1	1	||	44	85	64	|	35	42	51	||	0	-1.23683	0.413236	8.33312	0.0928466	||	0	-0.440682	0.660785	8.33312	0.0949154
Phkb	8:85875634-85879810	4176	9	1	3	|	3	0	1	||	46	41	54	|	30	40	41	||	0	-1.35318	0.413236	8.03225	0.0930617	||	0	-0.208044	0.944221	8.03225	0.470037
Knl1	2:119070980-119071069	89	1	3	2	|	0	0	1	||	124	193	237	|	133	205	335	||	0	-2.2725	0.413236	9.76215	0.0930799	||	0	0.391386	0.812967	9.76215	0.20859
Herc2	7:56067984-56072430	4446	6	2	3	|	2	0	1	||	74	99	143	|	58	52	150	||	0	-1.54451	0.413236	8.90049	0.0932941	||	0	-0.216317	0.944221	8.90049	0.50012
Pias1	9:62919351-62923655	4304	13	1	3	|	5	1	0	||	89	124	96	|	74	61	100	||	0	-1.15152	0.413236	8.96947	0.0933316	||	0	-0.270142	0.872095	8.96947	0.262371
Cdk8	5:146268215-146286239	18024	5	1	0	|	1	0	0	||	90	107	114	|	78	78	105	||	0	-2.22487	0.413236	8.84257	0.0935562	||	0	-0.119943	0.944221	8.84257	0.582063
Pip4k2a	2:18905275-18908152	2877	10	2	3	|	1	0	4	||	63	77	63	|	53	55	86	||	0	-1.2222	0.413236	8.58534	0.0935672	||	0	0.0494588	0.977962	8.58534	0.832662
Sipa1l1	12:82340662-82342499	1837	4	1	2	|	9	2	2	||	20	45	35	|	28	38	38	||	0	1.18975	0.413281	7.85246	0.0938039	||	0	0.222612	0.944221	7.85246	0.490783
Luc7l	17:26266283-26267358	1075	10	4	5	|	5	1	1	||	143	132	126	|	123	129	106	||	0	-1.13477	0.414282	9.4266	0.0942583	||	0	0.00268763	0.998257	9.4266	0.992875
Anp32b	4:46460090-46463929	3839	3	1	2	|	1	0	0	||	168	272	213	|	168	124	314	||	0	-2.24556	0.415689	9.77681	0.0948064	||	0	-0.0223468	0.988023	9.77681	0.935189
Pan3	5:147450653-147488258	37605	4	2	0	|	1	0	0	||	74	100	101	|	65	101	97	||	0	-2.23311	0.416737	8.77934	0.0952737	||	0	0.0948081	0.961696	8.77934	0.723698
Hace1	10:45588380-45618629	30249	3	0	3	|	0	1	0	||	103	102	101	|	113	90	219	||	0	-2.22614	0.42244	9.12772	0.0968093	||	0	0.526656	0.504966	9.12772	0.0487426
Pola1	X:93420567-93518554	97987	3	0	0	|	0	3	4	||	87	155	116	|	110	106	192	||	0	1.61163	0.427821	9.22633	0.0983812	||	0	0.305578	0.856165	9.22633	0.23773
Eif4e	3:138546321-138555491	9170	5	3	3	|	1	2	0	||	245	155	150	|	161	124	145	||	0	-1.54438	0.427821	9.60238	0.0985114	||	0	-0.239643	0.944221	9.60238	0.48747
Etv6	6:134062064-134066465	4401	22	4	6	|	11	1	1	||	66	44	39	|	38	25	27	||	0	-0.979671	0.429575	8.48279	0.0993394	||	0	-0.595313	0.740698	8.48279	0.143332
Paip2	18:35610871-35613502	2631	20	5	8	|	8	2	3	||	779	595	449	|	535	265	420	||	0	-0.994691	0.429575	11.0967	0.0993862	||	0	-0.467873	0.831291	11.0967	0.219547
Baz1b	5:135216590-135223218	6628	2	1	3	|	0	0	1	||	158	300	313	|	116	192	391	||	0	-2.246	0.434866	9.95599	0.101053	||	0	-0.0554998	0.982691	9.95599	0.875318
Gm7854	5:43165919-43191404	25485	3	1	2	|	1	0	0	||	4	2	4	|	2	0	1	||	0	-2.25323	0.434866	5.27453	0.101087	||	0	-1.42418	0.635115	5.27453	0.0898903
Brd8	18:34614448-34614797	349	6	0	0	|	1	0	0	||	179	233	179	|	160	106	228	||	0	-2.19873	0.437419	9.60667	0.101921	||	0	-0.159385	0.944221	9.60667	0.549218
Eif3a	19:60764032-60764233	201	3	1	2	|	0	1	0	||	134	204	201	|	113	244	298	||	0	-2.22345	0.438827	9.73967	0.102489	||	0	0.412685	0.812967	9.73967	0.208461
Kcmf1	6:72858774-72861925	3151	7	0	2	|	1	0	1	||	141	72	107	|	134	69	129	||	0	-1.76325	0.440789	9.07042	0.103189	||	0	0.137685	0.961696	9.07042	0.715695
Uty	Y:1129870-1137871	8001	2	0	2	|	0	0	0	||	46	0	64	|	54	0	0	||	0	-7.28613	0.443482	7.33294	0.104063	||	0	-0.785501	0.955694	7.33294	0.638658
Nup155	15:8139851-8141359	1508	15	1	1	|	6	0	0	||	97	121	126	|	91	109	135	||	0	-1.1367	0.445507	9.22695	0.104782	||	0	0.100085	0.961696	9.22695	0.708216
Dym	18:75052981-75063173	10192	1	0	0	|	2	2	0	||	49	73	71	|	50	38	81	||	0	2.30206	0.446647	8.24181	0.105366	||	0	-0.0793346	0.961696	8.24181	0.739908
Pikfyve	1:65190319-65205678	15359	1	0	0	|	2	2	0	||	55	59	63	|	67	56	68	||	0	2.30232	0.446647	8.29665	0.10554	||	0	0.251259	0.884914	8.29665	0.299256
Hnrnpll	17:80044494-80053641	9147	7	2	2	|	9	5	3	||	68	84	89	|	108	115	119	||	0	0.96345	0.446889	9.15544	0.105842	||	0	0.663881	0.195826	9.15544	0.00769382
Tfdp1	8:13357043-13365195	8152	3	1	2	|	0	0	1	||	441	269	323	|	317	154	406	||	0	-2.21912	0.447039	10.3157	0.106774	||	0	-0.187654	0.949762	10.3157	0.606673
Cep350	1:155940717-155962560	21843	0	1	0	|	0	2	2	||	52	66	115	|	55	47	114	||	0	2.32758	0.447039	8.4996	0.107069	||	0	-0.0188969	0.989186	8.4996	0.953718
Oxr1	15:41797474-41801695	4221	1	0	0	|	2	0	2	||	30	53	44	|	49	29	48	||	0	2.3056	0.447039	7.82334	0.107176	||	0	0.13525	0.955694	7.82334	0.648855
Zwilch	9:64160821-64161441	620	27	6	6	|	13	3	2	||	71	66	66	|	60	61	107	||	0	-0.767134	0.447039	9.19262	0.107356	||	0	0.25732	0.917494	9.19262	0.358559
Akap7	10:25267308-25271641	4333	1	0	0	|	2	2	0	||	64	109	103	|	69	67	154	||	0	2.30531	0.447039	8.78021	0.107536	||	0	0.16312	0.944221	8.78021	0.546826
Oma1	4:103319022-103331379	12357	1	0	0	|	1	2	1	||	40	23	25	|	23	19	25	||	0	2.33891	0.447039	7.2643	0.10759	||	0	-0.288301	0.944221	7.2643	0.474068
Top2a	11:98996729-99001441	4712	7	1	3	|	1	1	1	||	521	943	852	|	505	566	1194	||	0	-1.49629	0.447039	11.3678	0.107734	||	0	0.0604954	0.982691	11.3678	0.850631
Acbd6	1:155601454-155624958	23504	1	0	0	|	1	2	1	||	25	19	30	|	40	19	28	||	0	2.34157	0.447039	7.31038	0.10797	||	0	0.373826	0.917494	7.31038	0.360583
Dennd4a	9:64835508-64836081	573	1	0	0	|	2	2	0	||	257	362	364	|	228	310	489	||	0	2.30648	0.447039	10.3471	0.108323	||	0	0.173748	0.944221	10.3471	0.516707
Axin1	17:26142618-26143576	958	1	0	0	|	2	2	0	||	15	33	34	|	22	22	27	||	0	2.30649	0.447039	7.2241	0.108329	||	0	-0.0491285	0.983222	7.2241	0.88726
Top3a	11:60747866-60749589	1723	1	0	0	|	2	1	1	||	18	25	33	|	16	25	21	||	0	2.30863	0.450321	7.11764	0.109371	||	0	-0.128359	0.961696	7.11764	0.730523
Vapa	17:65592291-65595054	2763	26	12	8	|	14	5	3	||	303	269	230	|	294	218	274	||	0	-0.760751	0.45069	10.5655	0.109708	||	0	0.10219	0.961696	10.5655	0.732428
Blm	7:80460725-80496096	35371	0	0	1	|	2	2	0	||	131	117	139	|	130	131	259	||	0	2.2903	0.451399	9.38434	0.110127	||	0	0.49888	0.535321	9.38434	0.0584072
Fut8	12:77323845-77332329	8484	1	0	0	|	4	0	0	||	99	113	100	|	90	58	90	||	0	2.27978	0.451961	8.77473	0.110514	||	0	-0.257972	0.884914	8.77473	0.304383
Cdk13	13:17772301-17772957	656	0	1	0	|	2	2	0	||	68	133	104	|	73	105	121	||	0	2.28744	0.451961	8.8877	0.11076	||	0	0.129214	0.955694	8.8877	0.637224
Setd2	9:110590388-110604231	13843	0	0	1	|	2	2	0	||	66	135	133	|	68	97	139	||	0	2.28914	0.453476	8.93923	0.111402	||	0	0.0043966	0.996472	8.93923	0.987824
Tlk1	2:70786877-70786995	118	0	1	0	|	1	1	2	||	223	148	136	|	97	111	136	||	0	2.30659	0.453476	9.333	0.111629	||	0	-0.464327	0.757679	9.333	0.1589
Kmt2c	5:25347361-25349940	2579	2	5	1	|	1	1	0	||	82	207	161	|	75	106	190	||	0	-1.72548	0.455621	9.28734	0.113076	||	0	-0.157728	0.955694	9.28734	0.644968
Ash1l	3:89043119-89043643	524	3	2	3	|	2	0	0	||	40	110	90	|	32	48	75	||	0	-1.70842	0.455621	8.40434	0.113342	||	0	-0.489288	0.739223	8.40434	0.141412
Tipin	9:64288108-64294386	6278	1	0	0	|	2	0	2	||	378	245	247	|	415	197	391	||	0	2.31648	0.455621	10.2981	0.113791	||	0	0.289455	0.944221	10.2981	0.436542
Fkbp15	4:62329348-62336547	7199	4	4	0	|	1	0	1	||	70	84	107	|	61	87	101	||	0	-1.66974	0.455621	8.7483	0.114545	||	0	0.0723067	0.965408	8.7483	0.780067
Cep85l	10:53291764-53298205	6441	1	0	0	|	3	0	1	||	15	32	31	|	16	30	44	||	0	2.28739	0.455621	7.32287	0.114859	||	0	0.330036	0.934366	7.32287	0.388864
R3hcc1l	19:42562552-42564341	1789	4	2	2	|	0	2	0	||	32	37	39	|	39	30	40	||	0	-1.65536	0.455621	7.7414	0.115219	||	0	0.150146	0.944221	7.7414	0.585682
Trp53bp1	2:121235573-121236869	1296	0	0	1	|	3	0	1	||	32	22	22	|	19	20	22	||	0	2.26576	0.455621	7.12123	0.117503	||	0	-0.196651	0.949762	7.12123	0.609802
Hivep2	10:14004201-14066684	62483	1	5	0	|	0	1	0	||	17	67	22	|	17	6	5	||	0	-2.37947	0.455621	7.10098	0.117598	||	0	-1.63573	0.395354	7.10098	0.0296949
Ttc3	16:94383912-94393174	9262	7	3	4	|	3	2	0	||	46	55	40	|	38	36	42	||	0	-1.1625	0.455621	8.09285	0.117811	||	0	-0.14354	0.947086	8.09285	0.591564
Rn7sk	9:78175393-78175444	51	26	6	3	|	8	0	4	||	7661	7330	7532	|	7515	7599	7381	||	0	-1.12473	0.455621	14.3778	0.118547	||	0	0.157119	0.961696	14.3778	0.766827
Zmym4	4:126923064-126926023	2959	3	0	0	|	5	1	1	||	29	32	34	|	29	35	25	||	0	1.54356	0.455621	7.56374	0.118791	||	0	0.0789365	0.975877	7.56374	0.822062
Ube4b	4:149383738-149387216	3478	1	0	0	|	2	2	0	||	11	39	54	|	21	24	57	||	0	2.32216	0.455621	7.53872	0.119028	||	0	0.0842226	0.982691	7.53872	0.86083
Lin54	5:100475689-100480321	4632	11	3	2	|	4	1	1	||	80	92	84	|	69	70	111	||	0	-1.07252	0.455621	8.88522	0.119281	||	0	0.0780868	0.961696	8.88522	0.731055
Ilkap	1:91384565-91385346	781	4	3	1	|	2	0	0	||	235	128	169	|	189	143	213	||	0	-1.69884	0.455621	9.66884	0.119344	||	0	0.123007	0.961696	9.66884	0.717973
Fut8	12:77331896-77332329	433	3	0	0	|	7	0	0	||	118	149	123	|	97	67	96	||	0	1.51665	0.455621	9.03165	0.119623	||	0	-0.442844	0.620205	9.03165	0.0852893
Crebrf	17:26736789-26743131	6342	13	2	5	|	5	1	2	||	54	91	81	|	59	63	62	||	0	-0.973545	0.455621	8.74047	0.120094	||	0	-0.124356	0.955694	8.74047	0.636477
Zfx	X:94098283-94114263	15980	3	0	0	|	7	0	0	||	49	66	51	|	41	49	46	||	0	1.51603	0.455621	8.12548	0.120147	||	0	-0.129413	0.955694	8.12548	0.651067
Zfx	X:94098283-94102380	4097	9	3	0	|	13	1	4	||	64	75	65	|	65	57	66	||	0	0.898651	0.455621	8.73097	0.121579	||	0	0.0286443	0.987888	8.73097	0.91437
Strbp	2:37640851-37647285	6434	3	1	6	|	1	0	2	||	94	128	99	|	71	61	62	||	0	-1.42141	0.455621	8.80349	0.121635	||	0	-0.558928	0.466873	8.80349	0.0427147
Vav3	3:109562743-109578364	15621	5	0	3	|	7	5	1	||	40	64	68	|	53	52	66	||	0	1.03057	0.455621	8.44165	0.122042	||	0	0.139405	0.944221	8.44165	0.56878
Bard1	1:71065479-71089527	24048	5	3	0	|	1	1	0	||	84	84	71	|	65	57	147	||	0	-1.65381	0.455621	8.72117	0.122058	||	0	0.221641	0.944221	8.72117	0.447853
Lgals8	13:12454735-12459316	4581	4	3	3	|	1	1	1	||	84	82	79	|	90	79	83	||	0	-1.41295	0.455621	8.7806	0.122464	||	0	0.18986	0.944221	8.7806	0.472828
Bckdhb	9:83952524-83991822	39298	1	0	0	|	3	1	0	||	16	17	16	|	23	18	9	||	0	2.2809	0.455621	6.77607	0.124451	||	0	0.231637	0.955694	6.77607	0.646999
Adgre1	17:57419322-57420524	1202	7	2	3	|	4	0	0	||	91	89	106	|	109	68	85	||	0	-1.27463	0.455621	8.92096	0.125702	||	0	0.0272582	0.987924	8.92096	0.925146
Rsrc2	5:123733556-123740884	7328	0	2	0	|	0	0	0	||	76	119	102	|	74	96	100	||	0	-6.34902	0.455621	8.781	0.125707	||	0	0.0226176	0.988023	8.781	0.92806
Tm9sf3	19:41214041-41214105	64	0	2	0	|	0	0	0	||	134	174	160	|	154	212	159	||	0	-6.36095	0.455621	9.5046	0.12582	||	0	0.356748	0.856165	9.5046	0.245247
Tufm	7:126489357-126489440	83	0	2	0	|	0	0	0	||	127	94	103	|	98	62	72	||	0	-6.36383	0.455621	8.77572	0.125852	||	0	-0.341544	0.884914	8.77572	0.303789
Ccdc171	4:83535790-83558030	22240	0	2	0	|	0	0	0	||	8	21	13	|	10	7	13	||	0	-6.36449	0.455621	6.31766	0.125859	||	0	-0.339437	0.944221	6.31766	0.456587
Nfatc3	8:106078604-106079741	1137	0	1	1	|	0	0	0	||	43	69	55	|	46	33	39	||	0	-6.34843	0.455621	7.92192	0.125952	||	0	-0.337418	0.856165	7.92192	0.241679
Taf4	2:179935029-179939954	4925	3	3	2	|	0	0	2	||	15	38	40	|	17	23	43	||	0	-1.66548	0.455621	7.46671	0.125953	||	0	-0.0426609	0.987888	7.46671	0.911662
Gpatch2l	12:86265182-86269061	3879	0	0	2	|	0	0	0	||	51	44	55	|	45	42	62	||	0	-6.34234	0.455621	7.98629	0.126002	||	0	0.106088	0.960131	7.98629	0.677354
Dcp1a	14:30482193-30484586	2393	0	1	1	|	0	0	0	||	44	58	46	|	39	36	31	||	0	-6.35173	0.455621	7.79223	0.126038	||	0	-0.310188	0.895009	7.79223	0.322953
Dnajc3	14:118972712-118972813	101	0	1	1	|	0	0	0	||	162	227	151	|	192	167	171	||	0	-6.35439	0.455621	9.58511	0.12611	||	0	0.144791	0.953258	9.58511	0.615505
Crebrf	17:26739543-26763448	23905	0	0	2	|	0	0	0	||	62	83	87	|	60	70	62	||	0	-6.34516	0.455621	8.42544	0.126137	||	0	-0.101726	0.961696	8.42544	0.698733
Slc10a7	8:78686585-78706948	20363	0	0	2	|	0	0	0	||	32	51	48	|	32	34	32	||	0	-6.34614	0.455621	7.6561	0.126185	||	0	-0.251142	0.940307	7.6561	0.402621
Snd1	6:28526053-28545598	19545	0	0	2	|	0	0	0	||	140	183	214	|	157	125	162	||	0	-6.34657	0.455621	9.45893	0.126206	||	0	-0.117319	0.955694	9.45893	0.643112
Smad4	18:73662658-73678039	15381	0	2	0	|	0	0	0	||	36	59	45	|	38	41	15	||	0	-6.39355	0.455621	7.70432	0.126278	||	0	-0.318855	0.944221	7.70432	0.505907
Dicer1	12:104737769-104738848	1079	0	1	1	|	0	0	0	||	15	21	37	|	14	19	29	||	0	-6.36251	0.455621	7.00835	0.126343	||	0	-0.107486	0.96861	7.00835	0.791453
Ano6	15:95864225-95894541	30316	0	0	2	|	0	0	0	||	50	90	102	|	74	43	59	||	0	-6.35143	0.455621	8.39011	0.126451	||	0	-0.280788	0.922547	8.39011	0.367288
Cstf1	2:172375638-172376249	611	0	0	2	|	0	0	0	||	60	44	53	|	70	49	55	||	0	-6.35222	0.455621	8.13651	0.126491	||	0	0.28892	0.927982	8.13651	0.372923
Ercc6	14:32526149-32526878	729	0	0	2	|	0	0	0	||	14	24	28	|	15	24	23	||	0	-6.35403	0.455621	6.96202	0.126587	||	0	0.0691495	0.982691	6.96202	0.859109
Gm10925	1:24614436-24614605	169	0	2	0	|	0	0	0	||	5710	6318	4848	|	6004	5540	4295	||	0	-6.40945	0.455621	13.9233	0.126588	||	0	0.0980075	0.982691	13.9233	0.84528
Ep400	5:110755397-110756766	1369	23	8	22	|	7	10	8	||	76	114	96	|	58	96	141	||	0	-0.703475	0.455621	9.76646	0.126801	||	0	0.15723	0.955356	9.76646	0.621715
Zcchc11	4:108478873-108491464	12591	0	0	2	|	0	0	0	||	26	59	34	|	16	31	23	||	0	-6.36344	0.455621	7.4145	0.127109	||	0	-0.569625	0.773293	7.4145	0.175603
Aldh16a1	7:45142780-45143298	518	1	1	0	|	0	0	0	||	32	39	34	|	50	30	48	||	0	-6.33494	0.455621	7.6833	0.127236	||	0	0.418169	0.757679	7.6833	0.157179
Nacc1	8:84674765-84675104	339	7	0	1	|	0	2	0	||	69	64	69	|	55	33	65	||	0	-1.61513	0.455621	8.30622	0.127278	||	0	-0.292376	0.878017	8.30622	0.277748
Fbxo18	2:11760481-11763021	2540	2	0	0	|	0	0	0	||	52	70	68	|	63	45	81	||	0	-6.32569	0.455621	8.26608	0.127359	||	0	0.115811	0.949762	8.26608	0.607054
Pign	1:105653104-105656032	2928	2	0	0	|	0	0	0	||	63	78	82	|	62	74	83	||	0	-6.3243	0.455621	8.47088	0.127682	||	0	0.117553	0.949762	8.47088	0.609573
Chp1	2:119560731-119571895	11164	1	0	1	|	0	0	0	||	136	170	187	|	160	108	262	||	0	-6.33257	0.455621	9.48866	0.127756	||	0	0.193107	0.944221	9.48866	0.460607
Zswim6	13:107738372-107748363	9991	2	0	0	|	0	0	0	||	20	22	24	|	17	16	24	||	0	-6.32293	0.455621	6.91223	0.128001	||	0	-0.0873738	0.967734	6.91223	0.788031
Csad	15:102185998-102188962	2964	0	0	2	|	0	0	0	||	9	24	22	|	28	21	13	||	0	-6.37841	0.455621	6.87877	0.128045	||	0	0.408888	0.944221	6.87877	0.43225
Diaph2	X:130047325-130109381	62056	1	1	0	|	0	0	0	||	18	46	38	|	25	31	33	||	0	-6.33579	0.455621	7.4259	0.12813	||	0	-0.0243339	0.988023	7.4259	0.944446
Rrbp1	2:143973469-143974609	1140	1	0	1	|	0	0	0	||	66	71	56	|	111	80	85	||	0	-6.33243	0.455621	8.5742	0.128134	||	0	0.674442	0.375285	8.5742	0.0240726
Ube2q2	9:55176191-55185760	9569	2	1	1	|	3	2	3	||	66	77	66	|	60	70	78	||	0	1.32974	0.455621	8.54815	0.128183	||	0	0.131844	0.944221	8.54815	0.578176
Pcmt1	10:7640045-7649155	9110	1	1	0	|	0	0	0	||	250	192	202	|	280	179	242	||	0	-6.33619	0.455621	9.87418	0.12854	||	0	0.248487	0.944221	9.87418	0.432205
Rab3gap1	1:127909851-127915720	5869	2	0	0	|	0	0	0	||	71	86	103	|	80	86	83	||	0	-6.32031	0.455621	8.65398	0.128615	||	0	0.103738	0.961696	8.65398	0.686402
Bbs9	9:22670785-22679064	8279	2	0	0	|	0	0	0	||	28	25	28	|	23	16	26	||	0	-6.3198	0.455621	7.11536	0.128736	||	0	-0.196593	0.944221	7.11536	0.549446
Tdp2	13:24838147-24840558	2411	2	0	0	|	0	0	0	||	89	70	102	|	89	72	105	||	0	-6.31964	0.455621	8.69332	0.128772	||	0	0.14651	0.944221	8.69332	0.574407
Dennd5b	6:149080806-149084936	4130	0	0	2	|	0	0	0	||	13	17	17	|	11	2	2	||	0	-6.3891	0.455621	6.17991	0.128801	||	0	-1.41264	0.387	6.17991	0.0282022
Mkln1	6:31418931-31428225	9294	2	0	0	|	0	0	0	||	248	239	228	|	186	171	261	||	0	-6.31892	0.455621	9.836	0.128943	||	0	-0.103008	0.960131	9.836	0.677872
Vps13c	9:67876227-67890389	14162	2	0	0	|	0	0	0	||	82	83	71	|	58	86	92	||	0	-6.31864	0.455621	8.55932	0.129008	||	0	0.129487	0.955694	8.55932	0.633662
Topbp1	9:103334056-103336166	2110	6	2	2	|	1	1	1	||	221	293	240	|	245	257	353	||	0	-1.38746	0.455621	10.1545	0.129132	||	0	0.312457	0.787074	10.1545	0.189055
Reps1	10:18092845-18094908	2063	2	0	0	|	0	0	0	||	43	53	33	|	40	46	51	||	0	-6.31807	0.455621	7.84777	0.129143	||	0	0.223842	0.944221	7.84777	0.454142
Malat1	19:5802238-5802426	188	0	0	2	|	0	0	0	||	1883	6163	4279	|	1444	3570	3717	||	0	-6.39646	0.455621	13.2619	0.129369	||	0	-0.309348	0.944221	13.2619	0.573455
Slc25a30	14:75770171-75771533	1362	1	1	0	|	0	0	0	||	29	49	35	|	47	65	36	||	0	-6.337	0.455621	7.85104	0.129395	||	0	0.606377	0.70537	7.85104	0.121479
Zcchc11	4:108491348-108495327	3979	2	0	0	|	0	0	0	||	112	194	145	|	66	93	86	||	0	-6.3165	0.455621	9.01877	0.129515	||	0	-0.703448	0.249329	9.01877	0.0118923
Baz2b	2:59932105-59936751	4646	2	0	0	|	0	0	0	||	45	104	70	|	35	47	70	||	0	-6.31615	0.455621	8.21947	0.129599	||	0	-0.387561	0.793086	8.21947	0.194358
Heatr5a	12:51921338-51925173	3835	2	0	0	|	0	0	0	||	51	75	85	|	42	76	107	||	0	-6.31603	0.455621	8.4334	0.129627	||	0	0.211927	0.944221	8.4334	0.469005
Mtdh	15:34114024-34118110	4086	2	0	0	|	0	0	0	||	114	143	147	|	139	130	116	||	0	-6.31597	0.455621	9.20646	0.129639	||	0	0.113549	0.961696	9.20646	0.683237
Crk	11:75692197-75692562	365	2	0	0	|	0	0	0	||	116	152	141	|	133	100	101	||	0	-6.31596	0.455621	9.12454	0.129642	||	0	-0.113266	0.961696	9.12454	0.685444
Hltf	3:20072369-20076584	4215	2	0	0	|	0	0	0	||	37	73	44	|	31	47	47	||	0	-6.31422	0.455715	7.89024	0.130058	||	0	-0.137409	0.960131	7.89024	0.669323
Dnajc1	2:18284623-18294044	9421	2	0	0	|	0	0	0	||	32	43	39	|	30	50	39	||	0	-6.31329	0.455715	7.69017	0.130278	||	0	0.230687	0.944221	7.69017	0.492134
Akt2	7:27608623-27618319	9696	2	0	0	|	0	0	0	||	86	58	93	|	87	49	82	||	0	-6.31187	0.455715	8.51253	0.130619	||	0	-0.00453737	0.996472	8.51253	0.988659
Cspp1	1:10074860-10082346	7486	1	0	1	|	0	0	0	||	38	49	61	|	12	43	45	||	0	-6.33149	0.455715	7.73795	0.130668	||	0	-0.429556	0.885687	7.73795	0.307401
Pcmt1	10:7644325-7649155	4830	2	0	0	|	0	0	0	||	226	188	189	|	265	160	221	||	0	-6.30998	0.455805	9.77891	0.131072	||	0	0.230652	0.944221	9.77891	0.461229
Rbm39	2:156167538-156167750	212	2	0	0	|	0	0	0	||	789	1015	967	|	842	1136	1040	||	0	-6.30617	0.455805	11.6629	0.131995	||	0	0.297148	0.922547	11.6629	0.367704
Parn	16:13625509-13647299	21790	2	0	0	|	0	0	0	||	21	37	31	|	36	57	36	||	0	-6.30546	0.455805	7.62347	0.132167	||	0	0.737122	0.527611	7.62347	0.0559124
Rad18	6:112665278-112681676	16398	3	0	1	|	5	1	2	||	107	117	98	|	107	93	171	||	0	1.32239	0.455805	9.13494	0.132518	||	0	0.300554	0.808824	9.13494	0.203884
Arhgap10	8:77351614-77365160	13546	2	0	0	|	0	0	0	||	36	25	26	|	27	13	23	||	0	-6.3037	0.455805	7.15556	0.132596	||	0	-0.352929	0.937719	7.15556	0.394949
Uqcc1	2:155887109-155911836	24727	2	0	0	|	0	0	0	||	59	42	55	|	68	26	52	||	0	-6.30358	0.455805	8.00603	0.132626	||	0	0.0217111	0.989186	8.00603	0.954492
Smg6	11:74928993-74990215	61222	0	0	3	|	3	3	1	||	38	116	98	|	42	59	102	||	0	1.51594	0.455805	8.57722	0.13302	||	0	-0.177053	0.955588	8.57722	0.623497
Plekho1	3:95991444-95992278	834	2	0	0	|	0	0	0	||	106	107	80	|	102	51	54	||	0	-6.30149	0.455805	8.64104	0.133138	||	0	-0.330191	0.934146	8.64104	0.384106
Arhgap32	9:32181842-32208265	26423	2	0	0	|	0	0	0	||	7	7	4	|	8	4	5	||	0	-6.30102	0.455805	5.67037	0.133253	||	0	0.0526582	0.988023	5.67037	0.928462
P2rx4	5:122714399-122719226	4827	2	0	0	|	0	0	0	||	37	28	27	|	40	23	24	||	0	-6.30056	0.455805	7.38223	0.133367	||	0	0.0688254	0.982691	7.38223	0.869611
Map3k5	10:20067829-20082468	14639	2	0	0	|	0	0	0	||	20	58	71	|	25	31	58	||	0	-6.30025	0.455805	7.78353	0.133443	||	0	-0.253089	0.944221	7.78353	0.531387
Exoc6b	6:84746901-84747784	883	2	0	0	|	0	0	0	||	6	8	10	|	4	8	3	||	0	-6.29774	0.457069	5.75885	0.134064	||	0	-0.480323	0.944221	5.75885	0.40971
Ube2i	17:25264766-25269479	4713	2	0	0	|	0	0	0	||	699	447	445	|	609	344	448	||	0	-6.29564	0.457995	10.861	0.134586	||	0	-0.0630433	0.982691	10.861	0.87292
Asxl2	12:3442474-3457209	14735	9	1	0	|	3	0	0	||	40	43	68	|	40	50	71	||	0	-1.37439	0.458931	8.19503	0.135285	||	0	0.214917	0.944221	8.19503	0.463494
Rny3	6:47781668-47781720	52	1	0	1	|	0	0	0	||	2432	1576	2625	|	488	172	1160	||	0	-6.32971	0.458931	12.0791	0.135365	||	0	-1.90038	0.0292796	12.0791	0.000545782
Knl1	2:119076936-119081625	4689	32	6	23	|	14	7	8	||	150	302	252	|	109	176	341	||	0	-0.706146	0.462698	10.5319	0.136729	||	0	-0.0762092	0.975877	10.5319	0.826691
not_annotated	10:11492129-11492170	41	2	0	0	|	0	0	0	||	1	0	0	|	1	1	0	||	0	-6.28539	0.463337	4.60834	0.137172	||	0	0.752478	0.944221	4.60834	0.521166
Ccm2	11:6584520-6585217	697	12	1	2	|	4	1	0	||	148	125	126	|	120	47	84	||	0	-1.19601	0.46364	9.15563	0.137516	||	0	-0.538375	0.761261	9.15563	0.160265
Dcaf17	2:71056495-71063495	7000	9	3	2	|	4	0	1	||	40	42	33	|	48	26	32	||	0	-1.15594	0.464145	7.9336	0.13792	||	0	0.0342779	0.987924	7.9336	0.921976
Ezh2	6:47554124-47556150	2026	6	1	1	|	0	2	0	||	206	426	278	|	126	104	250	||	0	-1.60297	0.466213	9.90621	0.13879	||	0	-0.824551	0.195826	9.90621	0.00772996
Gtf2h1	7:46801672-46808879	7207	1	0	3	|	3	5	0	||	88	113	105	|	118	100	93	||	0	1.32208	0.469581	9.02825	0.140122	||	0	0.2036	0.944221	9.02825	0.481376
Ttc3	16:94383912-94403368	19456	7	5	5	|	5	1	1	||	39	70	41	|	43	29	38	||	0	-0.996942	0.469581	8.18506	0.140308	||	0	-0.287906	0.903988	8.18506	0.343987
Nfkb1	3:135655500-135669339	13839	22	3	3	|	7	3	2	||	26	57	43	|	33	32	38	||	0	-0.816049	0.474535	8.32754	0.142048	||	0	-0.125762	0.961696	8.32754	0.695204
Ttll3	6:113408905-113409340	435	13	0	4	|	3	1	2	||	18	18	13	|	7	12	15	||	0	-1.08209	0.476157	7.03351	0.142795	||	0	-0.409729	0.917494	7.03351	0.362169
Ndufv2	17:66089232-66089493	261	2	0	0	|	0	0	0	||	986	415	405	|	943	323	448	||	0	-6.26182	0.477115	11.0861	0.143367	||	0	0.0318541	0.989186	11.0861	0.954913
Pola1	X:93461369-93518554	57185	5	0	0	|	5	1	3	||	67	126	102	|	90	81	161	||	0	1.19748	0.477115	9.02056	0.143605	||	0	0.284105	0.875363	9.02056	0.266832
Tmem56	3:121228310-121235764	7454	34	5	17	|	18	2	7	||	156	105	164	|	178	91	205	||	0	-0.721125	0.477823	10.1482	0.144326	||	0	0.241272	0.944221	10.1482	0.509721
2003-03-01	18:56807664-56812075	4411	7	1	6	|	2	1	2	||	338	252	284	|	289	182	399	||	0	-1.14022	0.477823	10.2922	0.144342	||	0	0.0618374	0.980863	10.2922	0.838896
Sp3	2:72970155-72971514	1359	9	2	13	|	13	6	12	||	241	359	336	|	245	221	418	||	0	0.69686	0.487474	10.6014	0.147525	||	0	0.0264408	0.987924	10.6014	0.924322
Asph	4:9583812-9610938	27126	5	4	6	|	3	1	2	||	73	77	78	|	87	109	119	||	0	-1.02097	0.489225	8.98712	0.148323	||	0	0.604845	0.290457	8.98712	0.0149687
Smyd4	11:75390072-75391227	1155	1	0	4	|	1	0	0	||	8	8	13	|	10	11	16	||	0	-2.01017	0.501051	6.36028	0.152313	||	0	0.464653	0.884914	6.36028	0.297924
Atrnl1	19:57751630-57755618	3988	2	3	0	|	1	0	0	||	41	73	59	|	30	43	70	||	0	-1.9931	0.501051	8.08927	0.152458	||	0	-0.157001	0.944221	8.08927	0.578269
Evi5	5:107764676-107790508	25832	2	0	0	|	2	2	1	||	116	139	159	|	113	140	283	||	0	1.66242	0.501583	9.44625	0.153608	||	0	0.448869	0.691086	9.44625	0.107224
Actb	5:142903212-142903256	44	1	3	1	|	1	0	0	||	6592	7480	6823	|	6257	4474	5945	||	0	-2.08427	0.501583	14.0824	0.153637	||	0	-0.178078	0.961696	14.0824	0.699895
Znrf1	8:111606747-111609388	2641	2	2	1	|	1	0	0	||	33	43	40	|	36	17	31	||	0	-1.99356	0.501583	7.56054	0.153694	||	0	-0.325703	0.890551	7.56054	0.313939
Tm9sf3	19:41245444-41256340	10896	1	2	2	|	0	0	1	||	127	157	158	|	188	170	173	||	0	-1.99117	0.501583	9.51369	0.153948	||	0	0.435279	0.671132	9.51369	0.0993453
Mcmbp	7:128702243-128704644	2401	2	2	1	|	0	0	1	||	114	119	117	|	94	94	118	||	0	-1.97596	0.501583	9.01255	0.154277	||	0	-0.0622827	0.967661	9.01255	0.784549
Yeats2	16:20150442-20162137	11695	2	3	0	|	1	0	0	||	39	61	41	|	40	27	28	||	0	-2.00216	0.501583	7.76501	0.154297	||	0	-0.394303	0.857679	7.76501	0.248488
Rabep1	11:70917315-70925912	8597	3	1	1	|	1	0	0	||	32	61	56	|	41	48	61	||	0	-1.97534	0.501583	8.03683	0.154556	||	0	0.155931	0.944221	8.03683	0.549094
Phf2	13:48832004-48835295	3291	3	0	2	|	1	0	0	||	43	63	69	|	25	17	36	||	0	-1.9736	0.501583	7.81467	0.155037	||	0	-1.03744	0.012315	7.81467	0.000195798
Vav3	3:109525869-109528384	2515	19	4	3	|	9	3	0	||	56	80	72	|	44	50	79	||	0	-0.76755	0.501583	8.7892	0.155095	||	0	-0.146124	0.944221	8.7892	0.572632
Spen	4:141516836-141522392	5556	1	1	0	|	2	2	1	||	21	34	40	|	31	25	57	||	0	1.64129	0.50454	7.60994	0.156539	||	0	0.3556	0.856165	7.60994	0.246899
Sos1	17:80445430-80460047	14617	2	0	3	|	0	1	0	||	19	24	29	|	18	17	20	||	0	-1.97231	0.50454	7.04255	0.156562	||	0	-0.244399	0.944221	7.04255	0.468724
Pank2	2:131280157-131282768	2611	0	0	2	|	4	1	0	||	58	84	68	|	52	40	69	||	0	1.61685	0.506095	8.31037	0.158353	||	0	-0.257208	0.872095	8.31037	0.263658
Mllt10	2:18101458-18123812	22354	5	0	0	|	1	0	0	||	119	140	128	|	87	85	144	||	0	-1.95558	0.506095	9.07282	0.158682	||	0	-0.184799	0.941614	9.07282	0.405245
Ubp1	9:113944848-113958939	14091	1	1	0	|	2	3	0	||	150	175	181	|	138	222	274	||	0	1.64212	0.506095	9.6962	0.158798	||	0	0.449571	0.684452	9.6962	0.103023
Glis3	19:28530873-28540408	9535	1	0	1	|	1	3	1	||	4	4	5	|	8	4	4	||	0	1.68279	0.506095	5.72555	0.158974	||	0	0.431261	0.944221	5.72555	0.485294
Rmnd5a	6:71413250-71414919	1669	3	1	1	|	1	0	0	||	113	186	176	|	99	152	248	||	0	-1.97628	0.506095	9.46385	0.15914	||	0	0.180468	0.944221	9.46385	0.529644
Smc4	3:69019175-69025985	6810	1	2	2	|	0	1	0	||	351	713	537	|	348	645	932	||	0	-2.00614	0.506095	11.0359	0.1594	||	0	0.39234	0.878017	11.0359	0.272705
Mbd1	18:74273735-74274773	1038	0	0	2	|	4	0	1	||	58	57	71	|	60	55	98	||	0	1.61493	0.506095	8.4059	0.159529	||	0	0.300173	0.79892	8.4059	0.199159
Gigyf2	1:87364104-87374111	10007	4	0	1	|	0	1	0	||	106	98	95	|	63	58	91	||	0	-1.95323	0.506095	8.69407	0.159653	||	0	-0.389058	0.684452	8.69407	0.103141
Cd2ap	17:42845326-42852528	7202	3	0	2	|	1	0	0	||	74	78	72	|	78	70	56	||	0	-1.97316	0.506095	8.50711	0.159853	||	0	0.0420018	0.984861	8.50711	0.890618
Slc43a2	11:75543158-75545830	2672	3	0	2	|	1	0	0	||	28	43	60	|	31	40	38	||	0	-1.97316	0.506095	7.77895	0.159863	||	0	-0.0936011	0.965408	7.77895	0.775787
Poc1b	10:99124831-99129662	4831	3	0	2	|	0	1	0	||	15	19	22	|	10	11	19	||	0	-1.95904	0.506095	6.72607	0.160352	||	0	-0.36254	0.901905	6.72607	0.33183
Nipbl	15:8307565-8307986	421	3	1	1	|	1	0	0	||	107	176	246	|	109	148	179	||	0	-1.97658	0.506095	9.46097	0.160374	||	0	-0.118462	0.961696	9.46097	0.695858
Rangap1	15:81716567-81718922	2355	3	1	1	|	0	1	0	||	162	185	192	|	165	123	295	||	0	-1.96024	0.506462	9.64031	0.160768	||	0	0.190012	0.944221	9.64031	0.462008
Ccar1	10:62776568-62776963	395	2	0	0	|	4	0	1	||	152	247	174	|	112	152	176	||	0	1.62939	0.507112	9.53576	0.161253	||	0	-0.230413	0.934366	9.53576	0.390685
Ogdh	11:6313788-6317080	3292	24	5	2	|	10	2	1	||	150	166	202	|	110	58	242	||	0	-0.873515	0.509008	9.75027	0.1623	||	0	-0.308277	0.944221	9.75027	0.454774
Farsa	8:84864058-84864552	494	26	4	8	|	14	3	1	||	153	92	130	|	144	128	155	||	0	-0.746973	0.509008	9.78645	0.162461	||	0	0.302112	0.934366	9.78645	0.388623
Rnf149	1:39555478-39565332	9854	3	0	2	|	1	0	0	||	78	48	81	|	79	78	68	||	0	-1.973	0.509008	8.52559	0.16287	||	0	0.27264	0.944221	8.52559	0.41997
Icam2	11:106380667-106382546	1879	7	2	1	|	3	0	0	||	74	46	47	|	47	15	20	||	0	-1.41084	0.509008	7.9642	0.162972	||	0	-0.878864	0.606167	7.9642	0.0767679
Mipol1	12:57325524-57332459	6935	1	1	0	|	3	0	2	||	12	16	13	|	12	16	14	||	0	1.62578	0.510302	6.62417	0.163666	||	0	0.180677	0.957698	6.62417	0.658837
Susd3	13:49237424-49240671	3247	6	0	2	|	2	0	0	||	60	38	31	|	62	18	27	||	0	-1.62887	0.51101	7.86074	0.164173	||	0	-0.132843	0.971579	7.86074	0.803776
Ylpm1	12:85049692-85050372	680	3	1	1	|	0	1	0	||	45	103	87	|	39	69	86	||	0	-1.95575	0.511533	8.46355	0.164622	||	0	-0.125213	0.961696	8.46355	0.689662
Pip5k1b	19:24346237-24350289	4052	2	0	0	|	4	1	0	||	82	54	69	|	66	43	113	||	0	1.62746	0.512858	8.48277	0.165329	||	0	0.164861	0.949762	8.48277	0.606563
Prc1	7:80304361-80307695	3334	4	1	0	|	1	0	0	||	493	553	495	|	363	285	783	||	0	-1.9559	0.515672	10.8104	0.166624	||	0	-0.06101	0.982691	10.8104	0.844151
Srpk2	5:23540375-23565265	24890	3	2	0	|	0	0	1	||	43	69	75	|	36	79	63	||	0	-1.95563	0.515672	8.29423	0.166884	||	0	0.109773	0.961696	8.29423	0.748572
Xylt1	7:117548584-117549097	513	5	5	1	|	2	1	1	||	26	30	33	|	14	15	23	||	0	-1.13841	0.515672	7.34609	0.167085	||	0	-0.64749	0.443194	7.34609	0.0369596
Gdi2	13:3556314-3557057	743	4	0	1	|	1	0	0	||	461	508	472	|	581	391	444	||	0	-1.95167	0.517041	10.8141	0.167861	||	0	0.140714	0.957386	10.8141	0.653479
Snx9	17:5886997-5891899	4902	3	1	1	|	0	1	0	||	33	35	44	|	39	18	24	||	0	-1.95137	0.517041	7.52978	0.168428	||	0	-0.304289	0.944221	7.52978	0.418556
Cul4a	8:13136796-13142598	5802	4	0	5	|	10	4	0	||	178	231	235	|	200	216	417	||	0	0.91582	0.517041	10.1143	0.168555	||	0	0.460989	0.629482	10.1143	0.0873377
Msh3	13:92249827-92265991	16164	2	2	3	|	1	0	1	||	35	51	52	|	35	38	49	||	0	-1.48456	0.517041	7.92475	0.168662	||	0	-0.0402017	0.982691	7.92475	0.872626
Tpx2	2:152885011-152889322	4311	5	3	3	|	3	0	1	||	294	314	296	|	200	202	413	||	0	-1.15529	0.522513	10.2276	0.170978	||	0	-0.0780717	0.961696	10.2276	0.766393
Rras2	7:114058540-114060419	1879	11	2	2	|	5	0	0	||	34	28	29	|	32	8	7	||	0	-1.27575	0.522513	7.4563	0.17102	||	0	-0.747448	0.85179	7.4563	0.233643
Kmt2c	5:25347361-25353408	6047	3	0	2	|	0	1	0	||	81	177	187	|	68	123	186	||	0	-1.94452	0.523164	9.24804	0.17152	||	0	-0.10853	0.961696	9.24804	0.753536
Ube3a	7:59240967-59247217	6250	35	4	5	|	13	2	5	||	64	68	62	|	60	47	49	||	0	-0.698077	0.524213	9.11865	0.172322	||	0	-0.154888	0.960131	9.11865	0.66801
Lcorl	5:45775392-45776499	1107	3	3	1	|	1	1	0	||	37	56	42	|	47	61	65	||	0	-1.48067	0.524213	8.14086	0.172438	||	0	0.504564	0.527611	8.14086	0.0558392
Ipo11	13:106910200-106910816	616	8	2	1	|	2	1	1	||	53	66	66	|	60	61	86	||	0	-1.11372	0.524977	8.50207	0.173407	||	0	0.289349	0.783848	8.50207	0.187367
Dym	18:75080203-75082507	2304	9	2	2	|	3	0	2	||	54	66	68	|	61	35	63	||	0	-1.03104	0.524977	8.4008	0.17355	||	0	-0.11138	0.957987	8.4008	0.663868
Ubn2	6:38440455-38452971	12516	5	0	0	|	1	0	0	||	21	42	63	|	35	35	45	||	0	-1.92948	0.524977	7.77115	0.173553	||	0	0.0343672	0.987924	7.77115	0.924713
Frs2	10:117099943-117102198	2255	6	1	0	|	2	0	0	||	61	66	68	|	45	47	77	||	0	-1.46179	0.529543	8.31549	0.175353	||	0	-0.0955414	0.960131	8.31549	0.677632
Papd7	13:69512890-69515903	3013	8	2	3	|	12	2	4	||	20	24	21	|	24	12	33	||	0	0.778715	0.532021	7.65188	0.17664	||	0	0.187852	0.944221	7.65188	0.580463
Lnpk	2:74568941-74573626	4685	19	3	7	|	11	2	1	||	109	97	103	|	113	87	108	||	0	-0.726162	0.532021	9.37843	0.176757	||	0	0.131764	0.955694	9.37843	0.648705
Runx1	16:92688976-92695737	6761	5	4	0	|	1	0	2	||	82	95	93	|	52	41	92	||	0	-1.24749	0.536682	8.61731	0.1786	||	0	-0.450902	0.547851	8.61731	0.0621278
Gas5	1:161036208-161036579	371	2	0	0	|	3	0	2	||	1828	1188	1185	|	1878	1853	1137	||	0	1.66917	0.53671	12.2884	0.178903	||	0	0.388215	0.944221	12.2884	0.417452
Srgap1	10:121925816-121931509	5693	4	1	0	|	1	0	0	||	6	10	5	|	11	6	4	||	0	-1.94424	0.541729	5.968	0.180954	||	0	0.180827	0.961696	5.968	0.762333
Wasf2	4:133184969-133185752	783	5	2	0	|	2	0	0	||	67	160	122	|	67	57	98	||	0	-1.46916	0.541729	8.83673	0.18117	||	0	-0.505811	0.605032	8.83673	0.0751815
Ptpn9	9:57056714-57057861	1147	5	0	0	|	1	0	0	||	20	19	26	|	30	23	17	||	0	-1.9153	0.544512	7.13408	0.1824	||	0	0.289718	0.944221	7.13408	0.512429
Rexo5	7:119832671-119834401	1730	6	0	1	|	2	0	0	||	35	40	31	|	29	39	56	||	0	-1.45352	0.5447	7.77854	0.182761	||	0	0.335441	0.864605	7.77854	0.254265
Epb41	4:132000200-132003794	3594	1	0	3	|	6	0	2	||	532	836	855	|	519	911	1425	||	0	1.24248	0.545591	11.5039	0.183417	||	0	0.46893	0.79892	11.5039	0.19739
Csnk1g3	18:53895531-53906669	11138	8	4	1	|	2	2	1	||	32	38	34	|	23	20	17	||	0	-1.02718	0.545591	7.58476	0.183658	||	0	-0.629525	0.547851	7.58476	0.0616965
Mkln1	6:31418931-31433131	14200	8	1	2	|	3	1	0	||	267	278	277	|	206	189	294	||	0	-1.11213	0.545647	10.0841	0.183977	||	0	-0.143126	0.944221	10.0841	0.554828
Ubp1	9:113944848-113951684	6836	5	1	1	|	1	0	1	||	109	182	176	|	117	156	208	||	0	-1.45164	0.547644	9.47254	0.18495	||	0	0.183586	0.944221	9.47254	0.476691
Mllt10	2:18109782-18146872	37090	3	0	0	|	4	1	1	||	115	150	130	|	87	100	132	||	0	1.3245	0.55046	9.13472	0.186295	||	0	-0.176964	0.944221	9.13472	0.429587
Prex1	2:166617833-166647045	29212	6	0	1	|	10	0	1	||	54	69	82	|	60	39	74	||	0	0.956105	0.55046	8.4887	0.186505	||	0	-0.119892	0.955694	8.4887	0.651168
Cnot6l	5:96091584-96098313	6729	10	2	1	|	3	2	0	||	56	91	89	|	54	69	62	||	0	-1.01398	0.554178	8.62677	0.188068	||	0	-0.173805	0.944221	8.62677	0.532713
Bptf	11:107110813-107111635	822	2	0	0	|	5	0	0	||	59	195	162	|	45	78	130	||	0	1.58988	0.554994	8.98689	0.188663	||	0	-0.580561	0.757679	8.98689	0.159038
Tbcel	9:42437115-42451762	14647	1	4	3	|	7	3	3	||	80	146	165	|	102	111	272	||	0	0.941973	0.554994	9.48462	0.188953	||	0	0.390645	0.85179	9.48462	0.234001
Cwf19l2	9:3441055-3477962	36907	4	3	1	|	6	4	2	||	34	55	54	|	34	55	56	||	0	0.905814	0.555602	8.23569	0.189636	||	0	0.17296	0.944221	8.23569	0.536738
Fli1	9:32452133-32476773	24640	7	1	1	|	3	0	0	||	169	196	145	|	129	79	134	||	0	-1.24081	0.555602	9.3765	0.18977	||	0	-0.453056	0.691086	9.3765	0.106585
Ptbp3	4:59493186-59494610	1424	6	1	2	|	2	1	0	||	422	696	614	|	453	476	712	||	0	-1.23822	0.558497	11.0121	0.191065	||	0	0.0586731	0.975877	11.0121	0.827062
Nin	12:70035157-70040880	5723	2	1	0	|	3	2	1	||	62	138	102	|	84	100	142	||	0	1.32514	0.55866	8.97468	0.191427	||	0	0.256728	0.903988	8.97468	0.341691
9930021J03Rik	19:29753600-29755017	1417	2	1	0	|	3	1	2	||	17	38	35	|	23	20	24	||	0	1.32596	0.558916	7.33658	0.192249	||	0	-0.260697	0.944221	7.33658	0.444926
Gm9762	3:78966402-78966775	373	11	2	4	|	7	0	0	||	26	22	19	|	37	11	21	||	0	-1.01072	0.558916	7.52902	0.192307	||	0	0.177227	0.961696	7.52902	0.721229
Arih2	9:108644026-108644994	968	2	1	0	|	4	1	1	||	117	106	116	|	85	101	143	||	0	1.31232	0.558916	9.06354	0.192434	||	0	0.0634725	0.96861	9.06354	0.793311
Spire1	18:67519291-67519890	599	3	0	0	|	3	3	0	||	152	212	205	|	105	162	389	||	0	1.36189	0.55946	9.75269	0.192928	||	0	0.251539	0.944221	9.75269	0.475467
Satb1	17:51803431-51809287	5856	8	1	2	|	3	1	0	||	22	40	34	|	29	25	22	||	0	-1.10695	0.561618	7.57006	0.19398	||	0	-0.154819	0.957698	7.57006	0.657579
Rftn1	17:50036941-50055627	18686	6	0	1	|	0	0	2	||	45	56	45	|	33	27	28	||	0	-1.42068	0.563606	7.80459	0.194976	||	0	-0.57386	0.547851	7.80459	0.0621739
Ezh2	6:47551732-47577667	25935	7	10	8	|	8	3	2	||	201	274	267	|	129	84	220	||	0	-0.725517	0.566227	9.98465	0.197567	||	0	-0.691768	0.306102	9.98465	0.0163751
Zranb1	7:132948026-132950435	2409	2	2	0	|	0	1	6	||	56	65	58	|	51	70	76	||	0	1.17077	0.566227	8.41442	0.198881	||	0	0.275708	0.884914	8.41442	0.304795
1600002H07Rik	17:24218170-24220133	1963	6	0	3	|	1	0	2	||	59	49	42	|	58	33	57	||	0	-1.21554	0.566227	8.14791	0.200494	||	0	0.0902373	0.965408	8.14791	0.775361
Clpx	9:65316644-65324299	7655	0	0	0	|	0	0	1	||	67	91	98	|	94	87	120	||	0	5.67436	0.566227	8.74634	0.202663	||	0	0.37227	0.61911	8.74634	0.0838378
Clasp2	9:113766568-113773777	7209	0	0	0	|	0	0	1	||	46	72	69	|	46	41	86	||	0	5.6753	0.566227	8.17338	0.202721	||	0	-0.0043681	0.996472	8.17338	0.985983
Pccb	9:101023136-101030243	7107	0	0	0	|	0	0	1	||	34	28	31	|	30	27	33	||	0	5.67728	0.566227	7.37671	0.202847	||	0	0.0794321	0.971579	7.37671	0.79879
Stx16	2:174097258-174097320	62	0	0	0	|	0	1	0	||	31	57	54	|	37	45	40	||	0	5.67857	0.566227	7.81518	0.202997	||	0	-0.0398063	0.985324	7.81518	0.897549
Gramd1c	16:43997726-44040158	42432	0	0	0	|	0	1	0	||	7	11	7	|	6	6	7	||	0	5.68052	0.566227	5.82221	0.203139	||	0	-0.251655	0.955233	5.82221	0.618446
Tec	5:72823456-72825130	1674	0	0	0	|	0	0	1	||	57	62	43	|	35	22	25	||	0	5.68199	0.566227	7.72015	0.20315	||	0	-0.82919	0.337694	7.72015	0.0186991
Arhgef10l	4:140562714-140570402	7688	0	0	0	|	0	1	0	||	13	12	12	|	20	11	17	||	0	5.68159	0.566227	6.49132	0.203217	||	0	0.498639	0.856165	6.49132	0.242511
Luc7l2	6:38585041-38598814	13773	0	0	0	|	0	1	0	||	190	404	332	|	242	383	472	||	0	5.68222	0.566227	10.336	0.203263	||	0	0.401694	0.79892	10.336	0.198193
Ehbp1	11:22053432-22068506	15074	0	0	0	|	0	1	0	||	2	5	3	|	6	6	6	||	0	5.68384	0.566227	5.45425	0.203384	||	0	0.945251	0.707925	5.45425	0.123809
not_annotated	2:119076936-119081625	4689	0	0	0	|	0	1	0	||	150	302	252	|	109	176	341	||	0	5.68419	0.566227	9.78615	0.20341	||	0	-0.0761179	0.975877	9.78615	0.822139
Syf2	4:134934932-134935464	532	0	0	0	|	0	0	1	||	429	259	243	|	353	226	353	||	0	5.68766	0.566227	10.2692	0.203528	||	0	0.0878036	0.972297	10.2692	0.810429
Rabep1	11:70900472-70908517	8045	0	0	0	|	1	0	0	||	43	69	67	|	50	59	77	||	0	5.66562	0.566227	8.20868	0.203643	||	0	0.193949	0.944221	8.20868	0.41197
Ccnt1	15:98551914-98560325	8411	0	0	0	|	1	0	0	||	132	125	149	|	95	87	134	||	0	5.66467	0.566227	9.06282	0.203915	||	0	-0.247911	0.878017	9.06282	0.27784
Mtus1	8:41076232-41084840	8608	0	0	0	|	0	0	1	||	0	0	2	|	0	0	0	||	0	5.6949	0.566227	4.48365	0.204029	||	0	-1.85693	0.701221	4.48365	0.112641
Atxn1	13:45735115-45956575	221460	0	0	0	|	1	0	0	||	27	25	34	|	23	22	29	||	0	5.66392	0.566227	7.20442	0.204131	||	0	-0.0883276	0.965408	7.20442	0.777067
Erbin	13:103884143-103897928	13785	0	0	0	|	1	0	0	||	55	71	86	|	63	72	70	||	0	5.66382	0.566227	8.39028	0.204159	||	0	0.115638	0.957698	8.39028	0.654747
Taf4	2:179921152-179921967	815	0	0	0	|	1	0	0	||	41	73	69	|	30	43	78	||	0	5.66192	0.566227	8.07312	0.204708	||	0	-0.168512	0.944221	8.07312	0.566921
Tfdp2	9:96223094-96273942	50848	0	0	0	|	1	0	0	||	340	525	385	|	326	293	523	||	0	5.66188	0.566227	10.5317	0.204718	||	0	-0.016693	0.989186	10.5317	0.948
Ap1g1	8:109832717-109833566	849	0	0	0	|	1	0	0	||	54	113	113	|	56	69	73	||	0	5.66167	0.566227	8.5374	0.20478	||	0	-0.322033	0.872095	8.5374	0.259275
Cluh	11:74656423-74657339	916	0	0	0	|	1	0	0	||	36	47	33	|	43	43	40	||	0	5.66164	0.566227	7.72316	0.20479	||	0	0.27919	0.927982	7.72316	0.372013
Itch	2:155182158-155192210	10052	0	0	0	|	1	0	0	||	113	161	149	|	89	151	179	||	0	5.66149	0.566227	9.2542	0.204833	||	0	0.12319	0.957151	9.2542	0.652794
Zfand6	7:84632656-84653042	20386	0	0	0	|	1	0	0	||	189	183	166	|	169	103	203	||	0	5.66125	0.566227	9.48679	0.204901	||	0	-0.0809826	0.961791	9.48679	0.767746
Rcor3	1:192123539-192126027	2488	0	0	0	|	1	0	0	||	17	30	33	|	23	13	28	||	0	5.66111	0.566227	7.0606	0.204941	||	0	-0.18901	0.947086	7.0606	0.592374
Got2	8:95866821-95869637	2816	0	0	0	|	1	0	0	||	96	79	100	|	101	118	102	||	0	5.66046	0.566227	8.85936	0.20513	||	0	0.380641	0.79892	8.85936	0.197301
Selenbp1	3:94939646-94940226	580	0	0	0	|	1	0	0	||	112	73	87	|	150	98	170	||	0	5.65945	0.566227	9.02994	0.205424	||	0	0.710487	0.340492	9.02994	0.020561
Abca1	4:53107006-53109285	2279	0	0	0	|	1	0	0	||	47	50	59	|	70	76	51	||	0	5.65866	0.566227	8.21102	0.205654	||	0	0.529249	0.70045	8.21102	0.112112
Slc25a46	18:31594577-31602800	8223	0	0	0	|	1	0	0	||	121	97	82	|	116	89	97	||	0	5.65857	0.566227	8.8696	0.205679	||	0	0.146457	0.955694	8.8696	0.645995
Pik3c2a	7:116358636-116360100	1464	0	0	0	|	1	0	0	||	27	61	35	|	27	24	25	||	0	5.65833	0.566227	7.45543	0.205749	||	0	-0.513377	0.757679	7.45543	0.158759
Pi4k2a	19:42115037-42116566	1529	0	0	0	|	1	0	0	||	32	33	20	|	17	14	16	||	0	5.65748	0.566227	6.98071	0.206	||	0	-0.715617	0.605032	6.98071	0.0752973
Acox1	11:116189415-116189575	160	0	0	0	|	1	0	0	||	15	11	7	|	11	11	22	||	0	5.65588	0.566227	6.37339	0.206467	||	0	0.483197	0.880478	6.37339	0.293961
Mcph1	8:18668946-18689059	20113	5	1	8	|	4	1	1	||	74	81	107	|	82	93	216	||	0	-0.940991	0.566227	9.13999	0.206554	||	0	0.638735	0.456176	9.13999	0.0395153
Arap2	5:62730521-62735046	4525	0	0	0	|	1	0	0	||	18	32	24	|	14	19	11	||	0	5.65493	0.566227	6.84971	0.206747	||	0	-0.548517	0.809639	6.84971	0.205845
Cd47	16:49867765-49884254	16489	4	0	0	|	3	2	2	||	783	631	788	|	1063	662	1260	||	0	1.19402	0.566723	11.5535	0.20733	||	0	0.533891	0.698877	11.5535	0.109583
Txndc11	16:11116795-11128703	11908	14	4	5	|	8	0	3	||	76	97	76	|	57	36	37	||	0	-0.74449	0.566723	8.74585	0.20755	||	0	-0.764224	0.284305	8.74585	0.0144958
Erbb3	10:128578100-128579092	992	0	0	0	|	1	0	0	||	3	2	3	|	4	3	1	||	0	5.6495	0.56703	5.09345	0.208353	||	0	0.146886	0.982691	5.09345	0.848547
Fam135a	1:24085411-24086611	1200	0	0	0	|	1	0	0	||	5	3	5	|	12	4	7	||	0	5.64922	0.56703	5.6604	0.208437	||	0	0.922333	0.731098	5.6604	0.132989
Nfib	4:82350389-82383661	33272	0	0	0	|	1	0	0	||	8	5	6	|	15	10	7	||	0	5.64869	0.56703	5.98659	0.208595	||	0	0.893204	0.702952	5.98659	0.115601
Cped1	6:22132229-22145687	13458	0	0	0	|	1	0	0	||	4	3	4	|	9	5	3	||	0	5.64749	0.567157	5.46612	0.208952	||	0	0.760969	0.862824	5.46612	0.251184
Cth	3:157918426-157921036	2610	0	0	0	|	0	1	0	||	3	2	2	|	7	14	0	||	0	5.74895	0.567506	5.49105	0.209392	||	0	1.76954	0.597984	5.49105	0.0717974
Akap1	11:88849426-88850194	768	0	0	0	|	1	0	0	||	0	1	0	|	1	2	0	||	0	5.64408	0.568247	4.59353	0.209977	||	0	1.23512	0.878017	4.59353	0.278584
Pcdh17	14:84477323-84477687	364	0	0	0	|	1	0	0	||	2	0	1	|	3	0	1	||	0	5.64144	0.569563	4.73385	0.210776	||	0	0.440613	0.957698	4.73385	0.655534
Prdx6	1:161243575-161247413	3838	0	0	0	|	1	0	0	||	482	222	259	|	684	309	328	||	0	5.64011	0.569817	10.558	0.211182	||	0	0.587875	0.856043	10.558	0.236069
Arhgap10	8:77344640-77351672	7032	7	0	2	|	3	0	0	||	47	31	37	|	36	16	25	||	0	-1.23031	0.569967	7.64127	0.212026	||	0	-0.452658	0.878017	7.64127	0.280621
Adgre1	17:57401905-57402861	956	3	0	0	|	5	1	0	||	139	109	199	|	206	99	164	||	0	1.30962	0.569967	9.45313	0.212249	||	0	0.209517	0.944221	9.45313	0.565035
Esco1	18:10582055-10586041	3986	16	1	3	|	7	2	0	||	67	108	78	|	61	69	68	||	0	-0.782409	0.569967	8.8515	0.212615	||	0	-0.183778	0.944221	8.8515	0.533097
Rere	4:150406196-150431593	25397	1	0	0	|	0	3	0	||	36	51	48	|	22	24	25	||	0	1.90637	0.569967	7.55589	0.212769	||	0	-0.774447	0.195826	7.55589	0.00755796
Trip6	5:137311874-137312233	359	14	2	2	|	6	0	1	||	28	20	19	|	13	21	8	||	0	-0.995433	0.569967	7.35086	0.2128	||	0	-0.479372	0.934366	7.35086	0.3849
Scaper	9:55838120-55859918	21798	7	2	0	|	2	0	1	||	15	44	32	|	17	29	36	||	0	-1.21315	0.570157	7.49459	0.213184	||	0	0.00567351	0.996472	7.49459	0.988824
Rnf169	7:99935162-99955540	20378	55	6	12	|	26	7	3	||	40	40	35	|	34	25	23	||	0	-0.625341	0.576965	9.47109	0.216544	||	0	-0.319949	0.944221	9.47109	0.479455
Evi5	5:107764676-107799260	34584	1	1	2	|	2	2	3	||	92	153	140	|	112	154	247	||	0	1.13612	0.576965	9.43196	0.216575	||	0	0.52898	0.504966	9.43196	0.049736
Fndc3b	3:27620605-27643089	22484	5	0	0	|	1	0	0	||	43	20	16	|	44	18	22	||	0	-1.86725	0.576965	7.36364	0.217559	||	0	0.202265	0.961696	7.36364	0.735168
Ric8b	10:84947412-84948020	608	6	3	3	|	3	1	1	||	33	37	39	|	27	24	32	||	0	-0.939517	0.576965	7.72808	0.217593	||	0	-0.26071	0.903988	7.72808	0.338664
Dennd1a	2:38116605-38126648	10043	0	0	1	|	0	1	2	||	18	41	55	|	27	24	44	||	0	1.91137	0.576965	7.5565	0.218231	||	0	-0.123394	0.961696	7.5565	0.739342
Homer1	13:93341756-93356079	14323	1	0	0	|	2	0	1	||	15	18	16	|	16	15	21	||	0	1.88534	0.576965	6.74505	0.218569	||	0	0.20994	0.944221	6.74505	0.552997
Ppm1b	17:84993680-85005566	11886	4	2	4	|	9	2	3	||	70	79	115	|	72	73	111	||	0	0.778582	0.576965	8.94949	0.218755	||	0	0.0801921	0.961696	8.94949	0.747248
Ddi2	4:141698730-141703239	4509	1	0	0	|	2	1	0	||	95	110	140	|	90	111	174	||	0	1.88507	0.576965	9.08614	0.21876	||	0	0.231246	0.903988	9.08614	0.338192
Cep128	12:91289489-91299077	9588	3	1	1	|	7	1	1	||	58	171	170	|	62	132	240	||	0	1.10631	0.576965	9.33602	0.218866	||	0	0.232902	0.946864	9.33602	0.588676
Larp4b	13:9122108-9151224	29116	5	0	1	|	2	3	4	||	164	177	177	|	151	159	234	||	0	0.963911	0.576965	9.6818	0.219085	||	0	0.185084	0.944221	9.6818	0.437517
Arid4a	12:71019374-71023590	4216	1	0	0	|	2	1	0	||	56	110	101	|	71	76	134	||	0	1.8851	0.576965	8.73645	0.219209	||	0	0.197017	0.944221	8.73645	0.442149
Pum1	4:130718154-130719351	1197	40	9	15	|	31	3	3	||	98	165	155	|	91	108	182	||	0	-0.55711	0.577382	10.196	0.219684	||	0	-0.0160128	0.989893	10.196	0.963461
Tmem131l	3:83960687-83962421	1734	2	0	2	|	4	3	0	||	207	313	290	|	126	140	249	||	0	1.12317	0.577622	9.87773	0.220092	||	0	-0.544488	0.405409	9.87773	0.031514
Snx12	X:101213774-101215578	1804	4	0	0	|	5	1	1	||	60	56	43	|	58	32	46	||	0	1.14128	0.578165	8.12205	0.220616	||	0	-0.0932991	0.965408	8.12205	0.779462
Man2a1	17:64624528-64625451	923	6	4	2	|	4	0	1	||	54	79	59	|	55	76	59	||	0	-0.963616	0.579021	8.52139	0.221361	||	0	0.164196	0.944221	8.52139	0.578991
Lmbr1	5:29287391-29292949	5558	0	0	1	|	3	0	0	||	47	73	65	|	72	54	108	||	0	1.86776	0.579021	8.41559	0.221577	||	0	0.453625	0.504966	8.41559	0.0498529
Edem3	1:151796936-151796987	51	0	4	4	|	2	0	1	||	5	8	12	|	6	3	5	||	0	-1.26009	0.580043	6.06811	0.222286	||	0	-0.660899	0.878017	6.06811	0.285501
Usp6nl	2:6391055-6394555	3500	1	0	0	|	2	0	1	||	64	40	47	|	57	36	81	||	0	1.88592	0.580098	8.11803	0.222625	||	0	0.271168	0.943092	8.11803	0.406398
Specc1	11:62128200-62132454	4254	1	2	0	|	3	3	0	||	150	355	287	|	154	273	555	||	0	1.29281	0.580192	10.2006	0.223129	||	0	0.399672	0.884914	10.2006	0.300908
Atp9b	18:80869742-80917878	48136	0	0	1	|	1	1	1	||	66	37	59	|	61	51	57	||	0	1.88591	0.580192	8.16682	0.223495	||	0	0.187289	0.944221	8.16682	0.578372
Dtnb	12:3617606-3644022	26416	1	0	0	|	2	0	1	||	52	51	41	|	53	22	68	||	0	1.88608	0.580192	7.95384	0.223616	||	0	0.0671992	0.982691	7.95384	0.845185
Arhgap26	18:39227368-39246924	19556	1	0	0	|	2	1	0	||	22	35	24	|	13	29	33	||	0	1.88562	0.580631	7.22777	0.224342	||	0	0.0203201	0.989186	7.22777	0.957808
Usp48	4:137604523-137608182	3659	0	0	1	|	3	0	0	||	52	86	97	|	60	72	89	||	0	1.86206	0.580631	8.52503	0.224421	||	0	0.0619776	0.971579	8.52503	0.805385
Ino80	2:119434149-119445656	11507	3	1	0	|	5	0	2	||	34	62	64	|	33	47	39	||	0	1.12025	0.58178	8.04227	0.225184	||	0	-0.24272	0.944221	8.04227	0.441663
Dnmt3a	12:3835027-3873428	38401	0	0	1	|	2	0	1	||	16	29	17	|	14	14	16	||	0	1.86689	0.584947	6.79294	0.226731	||	0	-0.342028	0.933564	6.79294	0.380302
Ash1l	3:89033259-89043643	10384	0	1	0	|	2	1	0	||	49	90	80	|	32	65	69	||	0	1.86325	0.586446	8.31172	0.227634	||	0	-0.244562	0.944221	8.31172	0.430939
Arhgap21	2:20855354-20860036	4682	3	1	1	|	5	2	1	||	36	39	45	|	42	37	72	||	0	0.996403	0.588284	8.03578	0.22867	||	0	0.434938	0.609698	8.03578	0.0812716
Crk	11:75692197-75692732	535	6	4	2	|	2	2	1	||	75	113	107	|	85	68	77	||	0	-0.932109	0.589179	8.87631	0.22948	||	0	-0.190769	0.944221	8.87631	0.453153
St6galnac3	3:153411462-153411871	409	8	1	1	|	11	2	1	||	24	20	29	|	20	32	45	||	0	0.797072	0.589179	7.73597	0.229663	||	0	0.510436	0.757679	7.73597	0.157093
Tfrc	16:32620366-32623435	3069	1	0	0	|	2	1	0	||	2297	1864	2264	|	1689	1118	2681	||	0	1.88647	0.589624	12.5454	0.23016	||	0	-0.168102	0.957987	12.5454	0.663494
Tbcd	11:121496995-121500110	3115	0	1	0	|	3	0	0	||	71	123	137	|	107	155	205	||	0	1.84796	0.590506	9.21928	0.230828	||	0	0.638507	0.372774	9.21928	0.0233132
Wapl	14:34691682-34695105	3423	16	8	11	|	18	17	6	||	208	336	428	|	277	423	641	||	0	0.561913	0.592687	10.9842	0.232006	||	0	0.588569	0.605032	10.9842	0.0741262
Chuk	19:44084417-44088777	4360	5	3	2	|	3	0	1	||	94	113	104	|	90	96	114	||	0	-1.00398	0.59566	9.01968	0.233496	||	0	0.0885977	0.961696	9.01968	0.69514
Gtf2i	5:134282787-134287043	4256	1	0	0	|	3	0	0	||	35	69	57	|	41	17	25	||	0	1.85789	0.59585	7.75145	0.233897	||	0	-0.767091	0.504966	7.75145	0.0503763
Hspd1	1:55083725-55084785	1060	1	0	0	|	3	0	0	||	377	286	322	|	387	281	261	||	0	1.85724	0.596386	10.3303	0.234434	||	0	0.07711	0.975877	10.3303	0.826816
Fbxw4	19:45635735-45640521	4786	8	0	6	|	6	0	0	||	50	22	27	|	39	25	54	||	0	-0.958181	0.596623	7.9252	0.234855	||	0	0.297138	0.944221	7.9252	0.512026
Tfrc	16:32615193-32619176	3983	1	0	0	|	2	1	0	||	4285	2800	3819	|	2562	1415	3961	||	0	1.88774	0.600367	13.1395	0.236658	||	0	-0.419527	0.917494	13.1395	0.36137
Szt2	4:118402403-118402994	591	6	1	3	|	4	0	0	||	48	43	56	|	29	37	63	||	0	-1.00476	0.601695	8.06807	0.237511	||	0	-0.0924866	0.961696	8.06807	0.74199
Rpph1	14:50807500-50807650	150	6	2	1	|	2	0	1	||	7861	7688	7715	|	8011	7912	7813	||	0	-1.22659	0.601792	14.4123	0.237879	||	0	0.187849	0.961696	14.4123	0.692741
Arid1a	4:133719537-133723051	3514	5	4	5	|	1	5	0	||	56	135	64	|	50	34	69	||	0	-0.891458	0.60365	8.60046	0.239025	||	0	-0.600297	0.613924	8.60046	0.0824624
Sass6	3:116618256-116621508	3252	2	3	1	|	2	5	2	||	72	110	69	|	62	62	100	||	0	0.921877	0.60365	8.72697	0.239276	||	0	-0.0449527	0.982691	8.72697	0.86005
Tlk1	2:70768862-70786995	18133	20	4	10	|	10	3	5	||	92	72	74	|	54	60	71	||	0	-0.569281	0.60747	9.13164	0.241123	||	0	-0.245659	0.933564	9.13164	0.379161
Cyp4f18	8:71992832-71998295	5463	0	0	3	|	4	2	0	||	140	139	117	|	110	38	61	||	0	1.23595	0.612834	8.95154	0.246609	||	0	-0.7667	0.553741	8.95154	0.0631736
Zc3h4	7:16420158-16421507	1349	0	1	0	|	2	1	0	||	26	71	70	|	20	47	98	||	0	1.83535	0.612834	8.09461	0.246934	||	0	0.0712974	0.982691	8.09461	0.874246
Ankle2	5:110234347-110250807	16460	5	2	3	|	0	0	4	||	51	69	73	|	56	56	61	||	0	-0.972769	0.612834	8.4177	0.248687	||	0	-0.00348782	0.996472	8.4177	0.988502
Diaph3	14:86772086-86910123	138037	2	1	2	|	4	2	2	||	78	133	120	|	71	113	215	||	0	0.991212	0.612834	9.18782	0.24994	||	0	0.358335	0.856165	9.18782	0.242019
Lrmp	6:145158644-145161017	2373	6	0	5	|	15	0	2	||	465	527	495	|	276	93	275	||	0	0.81153	0.612834	10.5561	0.25012	||	0	-1.10536	0.235704	10.5561	0.0107466
Trpc6	9:8634047-8658377	24330	7	1	0	|	0	3	7	||	24	15	23	|	25	19	15	||	0	1.01838	0.612834	7.29571	0.250823	||	0	0.0940861	0.982691	7.29571	0.876203
Bub1b	2:118630945-118631899	954	20	4	2	|	12	1	0	||	236	225	300	|	210	152	339	||	0	-0.677239	0.612834	10.2105	0.252308	||	0	-0.0378578	0.987888	10.2105	0.910596
Ccnf	17:24224908-24226783	1875	1	2	1	|	1	0	0	||	121	150	167	|	91	80	237	||	0	-1.69039	0.612834	9.26722	0.252977	||	0	-0.0542705	0.982691	9.26722	0.859715
Sec63	10:42789300-42797733	8433	1	0	3	|	1	0	0	||	37	65	66	|	46	54	50	||	0	-1.67443	0.612834	8.1085	0.254021	||	0	0.0134103	0.989893	8.1085	0.963206
Snx13	12:35078900-35082971	4071	1	2	1	|	0	0	1	||	58	71	73	|	48	45	75	||	0	-1.65861	0.612834	8.28029	0.254088	||	0	-0.147071	0.944221	8.28029	0.497591
Srbd1	17:86098512-86120746	22234	4	1	3	|	5	4	2	||	58	74	86	|	85	81	146	||	0	0.788895	0.612834	8.90606	0.255658	||	0	0.626157	0.183046	8.90606	0.00662339
Spopl	2:23537328-23545579	8251	9	3	8	|	13	6	5	||	44	55	58	|	61	55	48	||	0	0.56867	0.612834	8.76841	0.256168	||	0	0.237582	0.941614	8.76841	0.404796
Tbk1	10:121552200-121553068	868	2	1	1	|	1	0	0	||	116	130	118	|	110	115	128	||	0	-1.66103	0.612834	9.1145	0.25625	||	0	0.100516	0.960131	9.1145	0.671873
Kiz	2:146889021-146891284	2263	6	2	3	|	5	5	4	||	36	55	39	|	32	29	57	||	0	0.694673	0.612834	8.14363	0.256313	||	0	-0.0288656	0.987888	8.14363	0.913125
Tbc1d14	5:36519273-36525048	5775	2	2	2	|	2	0	0	||	32	62	48	|	31	30	44	||	0	-1.27407	0.612834	7.83434	0.256785	||	0	-0.293827	0.878017	7.83434	0.288981
Mbd2	18:70580653-70593340	12687	7	2	1	|	3	0	1	||	321	260	310	|	284	234	423	||	0	-0.980613	0.612834	10.3096	0.256924	||	0	0.163998	0.944221	10.3096	0.545794
R3hcc1l	19:42562552-42576201	13649	1	0	3	|	0	0	1	||	33	35	35	|	28	31	33	||	0	-1.65789	0.612834	7.52599	0.256978	||	0	-0.0242396	0.988023	7.52599	0.933682
Crebbp	16:4137366-4138985	1619	6	1	1	|	3	0	0	||	84	125	118	|	69	62	124	||	0	-1.08013	0.612834	8.88954	0.257047	||	0	-0.250724	0.878017	8.88954	0.287534
Myb	10:21148332-21156457	8125	2	2	0	|	1	0	0	||	271	383	352	|	197	145	166	||	0	-1.66773	0.612834	10.0073	0.257807	||	0	-0.810434	0.123218	10.0073	0.00351279
Evi5	5:107788199-107790508	2309	2	0	2	|	1	0	0	||	108	136	148	|	128	155	277	||	0	-1.66026	0.612834	9.43629	0.258069	||	0	0.609496	0.313437	9.43629	0.0170122
N4bp2l2	5:150643169-150650739	7570	2	0	2	|	1	0	0	||	79	124	121	|	115	134	126	||	0	-1.66039	0.612834	9.0862	0.258208	||	0	0.390309	0.735086	9.0862	0.137983
Crebrf	17:26736816-26743131	6315	2	2	0	|	0	1	0	||	61	97	86	|	63	62	66	||	0	-1.6514	0.612834	8.48881	0.258695	||	0	-0.18923	0.944221	8.48881	0.441681
Arf3	15:98740337-98742829	2492	2	0	2	|	1	0	0	||	21	24	32	|	15	22	37	||	0	-1.66132	0.612834	7.20251	0.259192	||	0	0.0476765	0.984861	7.20251	0.89029
Cep57	9:13816887-13821683	4796	2	0	2	|	0	0	1	||	101	105	95	|	106	108	149	||	0	-1.6479	0.612834	9.0177	0.259493	||	0	0.389413	0.629482	9.0177	0.0876581
Xdh	17:73909247-73912540	3293	2	0	2	|	0	1	0	||	53	88	91	|	67	68	121	||	0	-1.64803	0.612834	8.61152	0.259546	||	0	0.260697	0.878017	8.61152	0.274953
Mark4	7:19436938-19437518	580	1	1	2	|	0	1	0	||	11	24	19	|	11	10	12	||	0	-1.66374	0.612834	6.60089	0.259786	||	0	-0.5485	0.783258	6.60089	0.184528
Kif15	9:122959117-122965986	6869	2	1	1	|	1	0	0	||	211	209	298	|	175	153	392	||	0	-1.6667	0.612834	9.9245	0.260035	||	0	0.0602772	0.981614	9.9245	0.840614
Wdr1	5:38545674-38547091	1417	2	1	3	|	2	0	0	||	465	358	511	|	468	249	420	||	0	-1.30091	0.612834	10.6416	0.260563	||	0	-0.108744	0.961696	10.6416	0.743085
Rnf214	9:45890804-45898491	7687	9	3	0	|	3	1	1	||	39	62	59	|	19	33	64	||	0	-0.898793	0.612834	8.09695	0.260707	||	0	-0.370982	0.872095	8.09695	0.263609
Cwf19l2	9:3441055-3460131	19076	6	2	2	|	1	2	1	||	35	59	61	|	37	61	58	||	0	-0.965063	0.612834	8.2229	0.260951	||	0	0.173134	0.944221	8.2229	0.553946
Brca2	5:150532055-150532402	347	2	1	1	|	1	0	0	||	47	88	101	|	56	92	180	||	0	-1.66911	0.612834	8.77411	0.261639	||	0	0.566593	0.664027	8.77411	0.0968171
Zfand3	17:30135323-30153368	18045	2	1	1	|	0	0	1	||	49	45	47	|	19	19	42	||	0	-1.64777	0.612834	7.64749	0.261673	||	0	-0.730309	0.313933	7.64749	0.0172112
Kif23	9:61919612-61925143	5531	3	2	1	|	5	4	0	||	213	323	287	|	158	164	362	||	0	0.897022	0.612834	10.0605	0.262037	||	0	-0.184862	0.944221	10.0605	0.50312
Sec63	10:42789300-42791291	1991	4	0	0	|	1	0	0	||	48	85	81	|	66	61	73	||	0	-1.63844	0.612834	8.42208	0.262742	||	0	0.0633821	0.971579	8.42208	0.79866
Traf3	12:111219811-111222397	2586	3	1	0	|	1	0	0	||	12	23	20	|	11	9	12	||	0	-1.64831	0.612834	6.59803	0.263242	||	0	-0.625411	0.70537	6.59803	0.121097
Susd1	4:59379599-59428064	48465	2	2	0	|	0	1	0	||	97	124	124	|	75	34	60	||	0	-1.64938	0.612834	8.68117	0.263259	||	0	-0.880516	0.115741	8.68117	0.00295688
Slc10a7	8:78525162-78531158	5996	3	0	3	|	2	0	0	||	68	80	95	|	71	42	64	||	0	-1.26183	0.612834	8.48285	0.263465	||	0	-0.311594	0.856165	8.48285	0.243577
Ambra1	2:91810030-91825352	15322	3	0	3	|	1	0	1	||	45	68	73	|	48	46	65	||	0	-1.2492	0.612834	8.23989	0.2636	||	0	-0.0881419	0.961696	8.23989	0.705204
Dennd4a	9:64835286-64836081	795	2	2	0	|	0	1	0	||	338	493	498	|	336	424	686	||	0	-1.6492	0.612834	10.7398	0.263669	||	0	0.234348	0.934366	10.7398	0.391452
Atxn7	14:14013073-14013655	582	4	3	1	|	6	2	3	||	33	44	32	|	23	20	27	||	0	0.776777	0.612834	7.69066	0.263943	||	0	-0.503037	0.623675	7.69066	0.0861656
Ptpn2	18:67675720-67677862	2142	2	0	2	|	1	0	0	||	168	141	114	|	174	98	122	||	0	-1.66606	0.612834	9.29009	0.264231	||	0	0.0376188	0.987888	9.29009	0.914771
Hnrnpu	1:178323134-178336158	13024	2	0	2	|	0	0	1	||	223	320	289	|	186	285	315	||	0	-1.64296	0.612834	10.0989	0.265279	||	0	0.0682707	0.971579	10.0989	0.802794
Kansl1	11:104350487-104378826	28339	3	0	1	|	0	1	0	||	83	140	143	|	94	71	98	||	0	-1.63412	0.612834	8.92885	0.265338	||	0	-0.315736	0.822317	8.92885	0.212342
Slc10a7	8:78515586-78578757	63171	4	0	0	|	1	0	0	||	67	85	54	|	48	33	63	||	0	-1.63468	0.612834	8.20763	0.265417	||	0	-0.404595	0.740698	8.20763	0.143754
Nhlrc2	19:56570416-56576284	5868	5	1	0	|	2	0	0	||	50	64	76	|	60	60	86	||	0	-1.24394	0.612834	8.40908	0.265627	||	0	0.246996	0.878017	8.40908	0.273443
Rbm33	5:28331111-28352643	21532	3	0	1	|	0	1	0	||	61	128	112	|	74	77	124	||	0	-1.63335	0.612834	8.8105	0.26586	||	0	0.00743081	0.993451	8.8105	0.977112
Atxn3	12:101945400-101948439	3039	4	0	0	|	1	0	0	||	56	59	91	|	65	70	76	||	0	-1.63388	0.612834	8.44216	0.265985	||	0	0.187516	0.944221	8.44216	0.49176
Dhx15	5:52180982-52184903	3921	2	1	1	|	0	0	1	||	409	416	347	|	421	316	390	||	0	-1.64476	0.612834	10.5453	0.266098	||	0	0.0857756	0.961696	10.5453	0.765956
Cnot6	11:49686847-49702654	15807	4	2	0	|	2	0	0	||	98	179	153	|	109	117	152	||	0	-1.25405	0.612834	9.26847	0.266423	||	0	-0.0315703	0.985324	9.26847	0.898288
Mkrn1	6:39404648-39410216	5568	2	0	2	|	0	0	1	||	480	480	604	|	604	649	1102	||	0	-1.6415	0.612834	11.1741	0.266989	||	0	0.68503	0.306102	11.1741	0.0164463
Adam10	9:70740075-70746326	6251	3	1	0	|	0	0	1	||	347	497	429	|	338	254	561	||	0	-1.63059	0.612834	10.5667	0.268634	||	0	-0.0479668	0.982691	10.5667	0.855667
Psma6	12:55407469-55414498	7029	2	2	0	|	1	0	0	||	801	468	481	|	885	387	447	||	0	-1.6938	0.612834	11.0758	0.269577	||	0	0.114215	0.972086	11.0758	0.80794
Utrn	10:12436281-12455564	19283	5	1	0	|	1	0	1	||	44	56	52	|	35	30	59	||	0	-1.2351	0.612834	7.96339	0.269586	||	0	-0.183038	0.944221	7.96339	0.461675
Plcl2	17:50541177-50544087	2910	3	1	2	|	2	0	0	||	57	81	89	|	30	87	100	||	0	-1.27933	0.612834	8.54214	0.270473	||	0	0.0644247	0.982691	8.54214	0.859587
Marf1	16:14138343-14140372	2029	7	1	0	|	2	0	1	||	72	91	89	|	32	32	76	||	0	-1.05564	0.612834	8.41027	0.270814	||	0	-0.761338	0.142809	8.41027	0.00454109
Adk	14:21234833-21240571	5738	3	0	1	|	1	0	0	||	246	153	186	|	252	147	276	||	0	-1.64116	0.612834	9.80667	0.270826	||	0	0.288478	0.934366	9.80667	0.389932
9130011E15Rik	19:45885952-45892148	6196	3	0	1	|	1	0	0	||	11	19	14	|	15	5	13	||	0	-1.64077	0.612834	6.47494	0.271475	||	0	-0.275136	0.944221	6.47494	0.550821
Ambra1	2:91805024-91825352	20328	4	2	0	|	0	0	2	||	44	55	64	|	39	43	46	||	0	-1.23269	0.612834	8.04651	0.272045	||	0	-0.199249	0.944221	8.04651	0.440394
Knstrn	2:118822248-118822323	75	2	2	4	|	0	6	5	||	10	20	18	|	10	13	9	||	0	0.904973	0.612834	6.91032	0.272272	||	0	-0.379216	0.944221	6.91032	0.502234
Dennd4a	9:64896334-64897430	1096	2	2	2	|	1	0	1	||	211	438	459	|	211	409	718	||	0	-1.28462	0.612834	10.587	0.273399	||	0	0.376346	0.891852	10.587	0.317548
Fam204a	19:60212673-60221304	8631	5	1	2	|	2	1	0	||	118	81	81	|	114	84	102	||	0	-1.07511	0.612834	8.94183	0.273447	||	0	0.221182	0.944221	8.94183	0.488547
Nsd2	5:33843112-33868878	25766	3	3	2	|	4	2	5	||	114	183	181	|	113	124	269	||	0	0.788226	0.612834	9.6051	0.273589	||	0	0.16949	0.944221	9.6051	0.544989
Morc3	16:93847288-93853217	5929	10	0	0	|	3	0	1	||	169	192	182	|	154	113	168	||	0	-0.938416	0.612834	9.56063	0.274892	||	0	-0.187343	0.944221	9.56063	0.473605
Etfa	9:55495562-55500164	4602	4	0	0	|	1	0	0	||	150	126	136	|	178	97	142	||	0	-1.62115	0.612834	9.29704	0.275354	||	0	0.150707	0.955694	9.29704	0.639196
Pip4k2a	2:18906229-18908152	1923	5	1	0	|	1	0	1	||	134	170	126	|	109	107	153	||	0	-1.22852	0.612834	9.26156	0.275611	||	0	-0.0961267	0.961696	9.26156	0.686381
Nktr	9:121727316-121731565	4249	4	2	0	|	0	0	2	||	59	77	77	|	70	98	100	||	0	-1.22854	0.612834	8.66528	0.275862	||	0	0.483005	0.534647	8.66528	0.0577443
Ehmt1	2:24877455-24887069	9614	2	0	0	|	2	0	2	||	41	58	82	|	39	37	55	||	0	1.32862	0.612834	8.08096	0.276057	||	0	-0.326953	0.85179	8.08096	0.234305
Larp4b	13:9117966-9123962	5996	2	0	0	|	2	1	1	||	118	131	148	|	128	98	208	||	0	1.32827	0.612834	9.28018	0.276143	||	0	0.221384	0.917494	9.28018	0.359551
Map4k2	19:6341903-6343386	1483	4	0	2	|	2	0	0	||	133	182	147	|	77	28	84	||	0	-1.24985	0.612834	8.98717	0.27658	||	0	-1.1797	0.0174076	8.98717	0.000286309
Bfar	16:13697333-13699075	1742	2	0	0	|	2	2	0	||	48	52	50	|	45	47	40	||	0	1.33015	0.612834	7.99293	0.277037	||	0	-0.0220245	0.988023	7.99293	0.93999
Wrn	8:33342977-33353399	10422	2	0	0	|	2	1	1	||	172	254	274	|	179	203	346	||	0	1.33099	0.612834	9.9354	0.277086	||	0	0.169978	0.944221	9.9354	0.503762
Strbp	2:37624173-37647285	23112	4	2	0	|	1	1	0	||	90	154	88	|	51	52	49	||	0	-1.23762	0.612834	8.64673	0.277401	||	0	-0.949507	0.0709832	8.64673	0.00159557
Picalm	7:90160448-90165616	5168	4	2	0	|	1	0	1	||	520	623	592	|	587	444	777	||	0	-1.23722	0.612834	11.0624	0.277526	||	0	0.174051	0.944221	11.0624	0.518043
Hnrnpu	1:178323134-178325313	2179	17	6	6	|	8	3	4	||	135	198	219	|	122	256	236	||	0	-0.601009	0.612834	10.0526	0.278106	||	0	0.322281	0.888683	10.0526	0.311038
Pik3c2a	7:116359996-116368189	8193	5	1	0	|	2	0	0	||	34	70	52	|	41	23	37	||	0	-1.23636	0.612834	7.87873	0.278411	||	0	-0.46514	0.757679	7.87873	0.152597
Man1a	10:54014415-54030794	16379	0	1	0	|	0	0	0	||	73	122	102	|	77	69	125	||	0	-5.35715	0.612834	8.74854	0.278823	||	0	-0.0114352	0.989186	8.74854	0.959673
Als2	1:59191889-59199191	7302	0	1	0	|	0	0	0	||	9	23	17	|	12	14	23	||	0	-5.36514	0.612834	6.6205	0.278898	||	0	0.129771	0.961696	6.6205	0.750704
Furin	7:80395335-80396048	713	0	1	0	|	0	0	0	||	54	72	53	|	52	18	42	||	0	-5.36759	0.612834	7.92454	0.278923	||	0	-0.541554	0.731098	7.92454	0.133862
Hsp90b1	10:86691629-86691742	113	0	1	0	|	0	0	0	||	943	1335	832	|	840	566	670	||	0	-5.37111	0.612834	11.5086	0.278963	||	0	-0.41269	0.856165	11.5086	0.243299
Zfp532	18:65638750-65656632	17882	0	1	0	|	0	0	0	||	3	2	2	|	3	1	4	||	0	-5.37329	0.612834	5.04654	0.278989	||	0	0.269884	0.961696	5.04654	0.721177
Coil	11:88981069-88982650	1581	0	0	1	|	0	0	0	||	31	31	32	|	22	21	25	||	0	-5.35628	0.612834	7.22113	0.279065	||	0	-0.332972	0.878017	7.22113	0.276902
Mcoln1	8:3508319-3511810	3491	0	0	1	|	0	0	0	||	23	31	34	|	24	34	53	||	0	-5.35709	0.612834	7.45541	0.279111	||	0	0.44609	0.735086	7.45541	0.138567
Gm26917	17:39844472-39845587	1115	0	1	0	|	0	0	0	||	190	111	143	|	311	84	317	||	0	-5.3837	0.612834	9.66115	0.27913	||	0	0.731021	0.702249	9.66115	0.113191
Hacl1	14:31618972-31622974	4002	0	0	1	|	0	0	0	||	12	13	17	|	28	18	29	||	0	-5.35883	0.612834	6.84584	0.279213	||	0	0.956632	0.22724	6.84584	0.00959292
Gm11407	4:80002931-80002986	55	0	1	0	|	0	0	0	||	1	7	2	|	2	0	1	||	0	-5.39083	0.612834	4.96612	0.279243	||	0	-1.38659	0.70537	4.96612	0.122589
Nono	X:101437209-101439680	2471	0	0	1	|	0	0	0	||	463	440	414	|	463	302	410	||	0	-5.36152	0.612834	10.616	0.279374	||	0	-0.0275994	0.98794	10.616	0.926736
Hmox2	16:4762559-4763846	1287	0	0	1	|	0	0	0	||	157	110	113	|	109	63	82	||	0	-5.36382	0.612834	8.92551	0.279516	||	0	-0.453496	0.787186	8.92551	0.191064
Mad1l1	5:140302915-140303697	782	2	0	0	|	2	1	1	||	72	119	159	|	69	69	167	||	0	1.33796	0.612834	8.96195	0.279543	||	0	-0.110386	0.961696	8.96195	0.725527
Mob3b	4:35083770-35084389	619	4	0	0	|	0	0	1	||	6	11	14	|	11	8	16	||	0	-1.60268	0.612834	6.3198	0.279644	||	0	0.29504	0.944221	6.3198	0.510299
Zfyve9	4:108717789-108727545	9756	0	0	1	|	0	0	0	||	3	7	11	|	13	13	8	||	0	-5.37087	0.612834	6.04945	0.27997	||	0	0.87885	0.702952	6.04945	0.115346
Ncor1	11:62398265-62401267	3002	0	0	1	|	0	0	0	||	137	386	336	|	118	292	363	||	0	-5.37092	0.612834	10.0496	0.279973	||	0	0.00523601	0.997091	10.0496	0.989987
Srp68	11:116262860-116263297	437	1	0	0	|	0	0	0	||	55	66	67	|	63	65	74	||	0	-5.34697	0.612834	8.30658	0.279987	||	0	0.246791	0.878017	8.30658	0.280973
Ttc39c	18:12684837-12698059	13222	0	0	1	|	0	0	0	||	8	5	4	|	9	2	9	||	0	-5.37144	0.612834	5.67328	0.280008	||	0	0.308208	0.949822	5.67328	0.612385
D230025D16Rik	8:105240841-105241139	298	1	0	0	|	0	0	0	||	52	53	54	|	71	66	81	||	0	-5.34667	0.612834	8.27177	0.280074	||	0	0.588996	0.257316	8.27177	0.012636
Mad1l1	5:140105515-140132825	27310	1	0	0	|	0	0	0	||	58	85	84	|	62	57	115	||	0	-5.34636	0.612834	8.4841	0.280164	||	0	0.149608	0.944221	8.4841	0.51853
Gls2	10:128207298-128208667	1369	0	0	1	|	0	0	0	||	2	2	7	|	2	2	9	||	0	-5.37733	0.612834	5.32085	0.280414	||	0	0.29132	0.961696	5.32085	0.68264
Gpatch2	1:187225503-187233826	8323	1	0	1	|	1	2	1	||	25	32	33	|	22	25	15	||	0	1.34085	0.612834	7.26085	0.280465	||	0	-0.344928	0.92876	7.26085	0.375422
Ddi2	4:141695407-141706058	10651	1	0	0	|	0	0	0	||	74	110	105	|	73	99	141	||	0	-5.34531	0.612834	8.82932	0.280472	||	0	0.240005	0.891852	8.82932	0.316998
Zranb1	7:132966507-132971339	4832	1	0	0	|	0	0	0	||	84	89	90	|	77	109	129	||	0	-5.34485	0.612834	8.79759	0.280607	||	0	0.38693	0.704264	8.79759	0.119309
Rprd1b	2:158047916-158050213	2297	1	0	0	|	0	0	0	||	49	59	80	|	34	41	84	||	0	-5.34322	0.612834	8.12313	0.281084	||	0	-0.150483	0.949762	8.12313	0.602687
Gk	X:85754332-85761407	7075	1	0	0	|	0	0	0	||	35	29	28	|	37	37	40	||	0	-5.34309	0.612834	7.52834	0.281122	||	0	0.43977	0.764529	7.52834	0.165534
Taok3	5:117215349-117217240	1891	1	0	0	|	0	0	0	||	77	88	85	|	49	79	133	||	0	-5.34287	0.612834	8.61785	0.281187	||	0	0.148369	0.948102	8.61785	0.596429
Ccz1	5:144004043-144009286	5243	1	0	0	|	0	0	0	||	142	131	128	|	173	140	168	||	0	-5.34278	0.612834	9.33991	0.281214	||	0	0.400851	0.734603	9.33991	0.136933
Ddx17	15:79542487-79543856	1369	1	0	0	|	0	0	0	||	372	528	603	|	360	380	497	||	0	-5.34248	0.612834	10.7063	0.281302	||	0	-0.130979	0.953852	10.7063	0.616553
Calu	6:29366040-29366977	937	1	0	0	|	0	0	0	||	165	199	202	|	263	208	223	||	0	-5.34215	0.612834	9.78317	0.281399	||	0	0.46505	0.633681	9.78317	0.0889377
Itpr2	6:146144109-146180355	36246	1	0	0	|	0	0	0	||	25	41	46	|	29	14	36	||	0	-5.34155	0.612834	7.39213	0.281573	||	0	-0.377713	0.876432	7.39213	0.267638
Tmem241	18:12058926-12074643	15717	1	0	0	|	0	0	0	||	11	17	15	|	16	19	16	||	0	-5.3408	0.612834	6.60159	0.281797	||	0	0.402718	0.891852	6.60159	0.319089
Zfp790	7:29822980-29824953	1973	1	0	0	|	0	0	0	||	12	24	15	|	14	12	13	||	0	-5.33984	0.612834	6.53979	0.28208	||	0	-0.225018	0.947086	6.53979	0.590213
Dym	18:75114790-75126919	12129	8	3	3	|	11	4	2	||	49	68	59	|	65	49	86	||	0	0.593373	0.612834	8.69224	0.282128	||	0	0.306491	0.783848	8.69224	0.187088
Rmdn2	17:79650302-79672573	22271	1	0	0	|	0	0	0	||	8	8	8	|	12	7	9	||	0	-5.33938	0.612834	5.98689	0.282215	||	0	0.352049	0.944221	5.98689	0.470609
Tmcc1	6:116042871-116043805	934	6	0	0	|	2	0	0	||	67	100	88	|	56	27	49	||	0	-1.22124	0.612834	8.36627	0.28222	||	0	-0.801656	0.181067	8.36627	0.00625396
Ehbp1	11:22053432-22068503	15071	1	0	0	|	0	0	0	||	3	5	3	|	6	6	6	||	0	-5.33822	0.612834	5.48122	0.282559	||	0	0.811545	0.773293	5.48122	0.175527
Fubp3	2:31603211-31605343	2132	1	0	0	|	0	0	0	||	21	28	22	|	32	36	25	||	0	-5.33819	0.612834	7.26042	0.282568	||	0	0.570171	0.735193	7.26042	0.139058
Frmd4b	6:97323655-97329564	5909	1	0	0	|	0	0	0	||	35	29	28	|	28	36	26	||	0	-5.33787	0.612834	7.38417	0.28266	||	0	0.126035	0.961696	7.38417	0.741109
Stag1	9:100776756-100803354	26598	1	1	0	|	2	0	2	||	180	284	228	|	169	193	305	||	0	1.31427	0.612834	9.88077	0.282674	||	0	0.0674767	0.967661	9.88077	0.786247
Ssh2	11:77393050-77398269	5219	1	0	0	|	0	0	0	||	114	114	141	|	112	64	64	||	0	-5.33765	0.612834	8.86735	0.282726	||	0	-0.437747	0.803928	8.86735	0.200982
Cdk8	5:146259505-146286239	26734	2	0	0	|	4	0	0	||	87	96	87	|	89	70	97	||	0	1.30562	0.612834	8.73828	0.282802	||	0	0.0557226	0.972297	8.73828	0.81238
Rnf169	7:99955467-99955540	73	1	0	0	|	0	0	0	||	57	53	47	|	45	36	25	||	0	-5.33625	0.612834	7.83093	0.283142	||	0	-0.385281	0.889696	7.83093	0.313056
Dcun1d1	3:35916220-35921187	4967	5	0	1	|	0	0	2	||	85	129	88	|	103	84	109	||	0	-1.21014	0.612834	8.91826	0.284378	||	0	0.121802	0.955694	8.91826	0.634231
Glt1d1	5:127644319-127657138	12819	1	0	0	|	0	0	0	||	1	4	1	|	3	4	3	||	0	-5.33161	0.612834	5.08624	0.284527	||	0	0.816292	0.878017	5.08624	0.283861
A430078G23Rik	8:3380258-3381980	1722	2	0	0	|	4	0	0	||	55	101	68	|	41	33	47	||	0	1.30381	0.612834	8.19771	0.284989	||	0	-0.737806	0.181469	8.19771	0.00646683
Creb1	1:64550849-64570276	19427	2	0	0	|	3	1	0	||	118	132	161	|	118	68	90	||	0	1.31621	0.612834	9.06173	0.285154	||	0	-0.412594	0.757679	9.06173	0.159066
Spata6	4:111746141-111747803	1662	1	0	0	|	0	0	0	||	16	23	21	|	25	18	10	||	0	-5.32948	0.612834	6.81753	0.285165	||	0	0.0362157	0.988023	6.81753	0.941272
Vps50	6:3516622-3524175	7553	1	0	1	|	3	0	1	||	62	50	66	|	52	35	63	||	0	1.30383	0.612834	8.15754	0.285272	||	0	-0.138297	0.949822	8.15754	0.611827
Aff1	5:103783124-103784513	1389	3	6	11	|	6	2	3	||	108	209	147	|	74	58	130	||	0	-0.661699	0.612834	9.38951	0.285333	||	0	-0.714971	0.380534	9.38951	0.0263158
Tmem164	X:142832501-142834393	1892	8	1	4	|	3	0	3	||	83	92	96	|	62	44	96	||	0	-0.771886	0.612834	8.76034	0.28566	||	0	-0.324307	0.773293	8.76034	0.174146
Rpph1	14:50807447-50807694	247	2	1	2	|	8	1	1	||	3335	1652	1963	|	3255	427	1162	||	0	1.11806	0.612834	12.6156	0.28598	||	0	-0.393473	0.944221	12.6156	0.566793
Pdia5	16:35449403-35466657	17254	1	0	0	|	0	0	0	||	4	4	8	|	12	6	4	||	0	-5.32472	0.612834	5.71058	0.286602	||	0	0.629776	0.893536	5.71058	0.321115
Hecw2	1:53904249-53914632	10383	1	0	0	|	0	0	0	||	7	4	8	|	11	6	3	||	0	-5.32248	0.612834	5.73637	0.287283	||	0	0.249948	0.961696	5.73637	0.697962
Eif4h	5:134621949-134627775	5826	5	1	0	|	2	0	0	||	454	336	492	|	530	299	613	||	0	-1.23174	0.612834	10.7491	0.287467	||	0	0.261574	0.944221	10.7491	0.427433
Gpatch2l	12:86256481-86269061	12580	1	0	1	|	2	0	2	||	24	16	30	|	18	21	39	||	0	1.31753	0.612834	7.20912	0.287526	||	0	0.239429	0.944221	7.20912	0.527019
Diaph3	14:86810336-86910123	99787	3	2	3	|	5	3	3	||	85	162	134	|	89	116	245	||	0	0.773604	0.612834	9.40425	0.287891	||	0	0.328216	0.878017	9.40425	0.275471
Ift80	3:68985415-68994582	9167	6	0	0	|	2	0	0	||	86	117	150	|	75	88	193	||	0	-1.21502	0.612834	9.08366	0.288289	||	0	0.0927468	0.961696	9.08366	0.756732
Apoe	7:19696956-19697087	131	1	0	0	|	0	0	0	||	723	390	538	|	1371	1317	616	||	0	-5.31916	0.612834	11.5454	0.288295	||	0	1.19675	0.340492	11.5454	0.0199079
Apoe	7:19696338-19697010	672	1	0	0	|	0	0	0	||	1009	551	600	|	1540	1412	716	||	0	-5.31813	0.612834	11.7414	0.28861	||	0	0.946394	0.585817	11.7414	0.0687307
Tshz2	2:169883526-169886586	3060	1	0	0	|	0	0	0	||	2	5	3	|	7	7	1	||	0	-5.31581	0.61363	5.38451	0.289321	||	0	0.783594	0.884914	5.38451	0.297309
Lrig1	6:94654847-94663998	9151	1	0	0	|	0	0	0	||	6	2	3	|	7	0	7	||	0	-5.31243	0.615128	5.36531	0.290365	||	0	0.375187	0.955356	5.36531	0.621509
Acvr2a	2:48870289-48873473	3184	3	0	1	|	1	0	0	||	10	5	5	|	15	14	6	||	0	-1.63025	0.616482	6.19541	0.291342	||	0	0.962145	0.704264	6.19541	0.119038
Aagab	9:63616686-63619231	2545	10	3	2	|	3	3	1	||	80	63	77	|	98	65	94	||	0	-0.733621	0.617123	8.8443	0.291983	||	0	0.348326	0.831291	8.8443	0.219212
Malat1	19:5801885-5801940	55	1	4	1	|	0	0	2	||	1780	5899	3799	|	1509	3235	3363	||	0	-1.31495	0.618628	13.1812	0.293105	||	0	-0.309521	0.944221	13.1812	0.57451
Galnt7	8:57583767-57584227	460	1	1	0	|	2	2	0	||	16	34	42	|	21	18	16	||	0	1.31193	0.618628	7.20099	0.29392	||	0	-0.542077	0.787074	7.20099	0.189353
Tnrc6b	15:80923458-80924156	698	0	0	2	|	2	0	2	||	96	156	151	|	69	76	197	||	0	1.29661	0.618628	9.1199	0.294433	||	0	-0.169587	0.944221	9.1199	0.582772
Slc25a21	12:57154494-57155979	1485	6	0	2	|	3	0	0	||	28	49	58	|	17	43	85	||	0	-1.07217	0.618628	8.00739	0.294438	||	0	0.179789	0.960131	8.00739	0.677618
Atp9a	2:168705123-168710976	5853	0	1	0	|	3	0	0	||	5	8	5	|	19	6	4	||	0	1.72667	0.618628	6.00941	0.294625	||	0	0.886199	0.815562	6.00941	0.21015
Pa2g4	10:128563240-128563639	399	0	2	0	|	1	1	2	||	382	342	296	|	431	252	321	||	0	1.30806	0.618628	10.4098	0.29473	||	0	0.120194	0.961696	10.4098	0.721482
Wbscr22	5:135056842-135060830	3988	4	0	0	|	1	0	0	||	105	53	70	|	100	43	50	||	0	-1.5923	0.625796	8.48397	0.298488	||	0	-0.102725	0.975877	8.48397	0.826095
Clasp2	9:113761590-113773777	12187	3	0	0	|	1	2	2	||	33	66	64	|	46	41	69	||	0	1.09097	0.626345	8.13845	0.299093	||	0	0.0722279	0.967661	8.13845	0.7842
Kif23	9:61924632-61926518	1886	5	4	2	|	3	1	1	||	164	242	211	|	128	126	302	||	0	-0.830815	0.631413	9.77227	0.30186	||	0	-0.0772901	0.965408	9.77227	0.779958
Parp11	6:127468032-127478129	10097	4	7	0	|	1	2	2	||	53	68	51	|	44	31	43	||	0	-0.817869	0.632352	8.17678	0.302655	||	0	-0.402571	0.763638	8.17678	0.161603
Tubgcp3	8:12632238-12641207	8969	2	0	1	|	1	1	3	||	116	117	115	|	91	93	160	||	0	1.07977	0.63352	9.08934	0.30376	||	0	0.0789499	0.961696	9.08934	0.734819
Ppp4r1	17:65810538-65816050	5512	3	0	0	|	2	1	2	||	56	97	93	|	55	55	73	||	0	1.07615	0.63352	8.49912	0.303909	||	0	-0.278062	0.856165	8.49912	0.240394
Cep128	12:91325515-91348876	23361	1	1	0	|	2	2	0	||	64	174	144	|	46	100	210	||	0	1.31026	0.634153	9.09785	0.30456	||	0	-0.015154	0.991451	9.09785	0.971691
Cd47	16:49894177-49898132	3955	0	2	0	|	2	2	0	||	1145	1138	1043	|	1517	1098	1819	||	0	1.28025	0.634956	12.0381	0.305294	||	0	0.524112	0.704264	12.0381	0.116844
Psd3	8:67904117-67908889	4772	0	2	0	|	2	0	2	||	33	52	46	|	49	18	32	||	0	1.28002	0.636207	7.73093	0.306305	||	0	-0.237447	0.944221	7.73093	0.540854
Dock1	7:134874058-134876315	2257	0	0	2	|	4	0	0	||	36	30	52	|	46	29	50	||	0	1.26063	0.636207	7.79867	0.306593	||	0	0.20501	0.944221	7.79867	0.53468
Pag1	3:9749456-9752486	3030	6	5	3	|	5	0	2	||	27	49	34	|	13	19	27	||	0	-0.70914	0.641497	7.65378	0.309494	||	0	-0.76313	0.339606	7.65378	0.0191547
Tulp4	17:6137211-6139156	1945	6	3	7	|	6	8	5	||	10	18	12	|	12	7	6	||	0	0.601721	0.642876	7.19665	0.310512	||	0	-0.49562	0.884914	7.19665	0.299887
Slc16a10	10:40076564-40080807	4243	20	4	9	|	20	4	12	||	85	114	132	|	87	62	207	||	0	0.480211	0.645872	9.75775	0.312313	||	0	0.155732	0.955694	9.75775	0.638596
Map4k2	19:6341903-6342657	754	7	1	0	|	0	1	2	||	147	176	159	|	89	34	85	||	0	-0.988425	0.653874	9.10143	0.316541	||	0	-1.09355	0.0463883	9.10143	0.000896582
Snx2	18:53189655-53203119	13464	7	1	0	|	2	1	0	||	357	419	276	|	268	120	160	||	0	-1.01637	0.655164	10.1294	0.317525	||	0	-0.77495	0.495842	10.1294	0.0475725
Ckap5	2:91562754-91563113	359	23	0	4	|	10	1	2	||	148	201	253	|	109	162	302	||	0	-0.625791	0.656083	9.96905	0.31833	||	0	0.0161802	0.989922	9.96905	0.967568
Hibadh	6:52619977-52630349	10372	8	7	2	|	7	1	1	||	57	50	43	|	55	27	40	||	0	-0.662338	0.658015	8.28439	0.319628	||	0	-0.164316	0.955694	8.28439	0.637812
Gtf2e2	8:33735734-33762103	26369	2	0	1	|	4	1	0	||	97	131	92	|	109	76	137	||	0	1.04563	0.659727	8.9957	0.320821	||	0	0.127271	0.949762	8.9957	0.606827
Pum2	12:8698091-8706041	7950	2	1	0	|	4	1	0	||	186	258	261	|	177	135	229	||	0	1.0433	0.66174	9.79004	0.322163	||	0	-0.252361	0.878017	9.79004	0.286636
Zfp568	7:29997750-29998210	460	3	0	0	|	4	0	1	||	13	23	25	|	17	19	17	||	0	1.05885	0.662388	6.9719	0.322841	||	0	-0.0331438	0.988023	6.9719	0.931744
Zfand6	7:84632656-84634409	1753	11	0	7	|	6	2	1	||	327	303	267	|	301	151	321	||	0	-0.65926	0.662771	10.2965	0.323392	||	0	-0.118531	0.961696	10.2965	0.716446
Atp9b	18:80909592-80917878	8286	14	2	1	|	3	3	2	||	68	60	57	|	63	60	54	||	0	-0.658498	0.671599	8.58239	0.328395	||	0	0.0904802	0.965408	8.58239	0.776863
Kdm4b	17:56351633-56356056	4423	3	0	0	|	4	1	0	||	20	16	25	|	22	11	18	||	0	1.05921	0.671599	6.95571	0.328436	||	0	-0.124754	0.961696	6.95571	0.767143
Abhd17b	19:21678353-21684305	5952	5	4	0	|	3	0	1	||	23	22	31	|	18	23	23	||	0	-0.856086	0.675779	7.31018	0.33085	||	0	-0.105678	0.961696	7.31018	0.762248
Man2b1	8:85097409-85097574	165	2	1	1	|	2	2	2	||	192	206	250	|	229	196	278	||	0	0.919653	0.67649	9.92977	0.331569	||	0	0.250598	0.884914	9.92977	0.302624
Azin1	15:38493474-38498841	5367	3	0	1	|	3	1	2	||	427	581	686	|	362	390	755	||	0	0.928273	0.682055	10.9283	0.33467	||	0	-0.0729841	0.971579	10.9283	0.797775
Rnf111	9:70469355-70476668	7313	6	2	1	|	2	2	0	||	48	80	66	|	38	31	41	||	0	-0.828891	0.684711	8.16232	0.336349	||	0	-0.66793	0.218145	8.16232	0.00885019
Cep128	12:91255575-91260636	5061	1	0	2	|	2	2	1	||	57	160	143	|	61	129	214	||	0	1.06016	0.686431	9.17966	0.337571	||	0	0.287086	0.944221	9.17966	0.472575
Med12l	3:59031546-59042413	10867	5	0	1	|	0	2	0	||	10	6	10	|	3	8	5	||	0	-1.13931	0.686546	6.03246	0.338216	||	0	-0.543468	0.916267	6.03246	0.356001
Rsf1	7:97660813-97664766	3953	1	1	5	|	3	0	0	||	40	70	80	|	36	44	67	||	0	-0.944302	0.686546	8.23175	0.33942	||	0	-0.236406	0.940307	8.23175	0.400762
Lcmt1	7:123400438-123410826	10388	2	1	0	|	3	0	2	||	110	63	82	|	117	47	80	||	0	1.05562	0.686546	8.72293	0.339495	||	0	0.0502884	0.985324	8.72293	0.901154
Mgat4a	1:37490260-37498740	8480	3	0	0	|	5	0	0	||	19	28	29	|	18	14	11	||	0	1.03453	0.686546	7.0166	0.340531	||	0	-0.631843	0.734603	7.0166	0.136878
Susd1	4:59411270-59428064	16794	11	2	1	|	7	0	0	||	103	125	130	|	67	36	66	||	0	-0.672445	0.686546	8.90249	0.340576	||	0	-0.948375	0.0463883	8.90249	0.000915558
Cdyl	13:35815909-35816575	666	68	18	11	|	41	9	8	||	52	40	47	|	46	42	69	||	0	-0.408043	0.686546	10.2687	0.340594	||	0	0.267412	0.944221	10.2687	0.487515
Mllt10	2:18122245-18126229	3984	8	0	1	|	4	0	0	||	110	137	107	|	86	76	127	||	0	-0.825561	0.686546	9.04493	0.340751	||	0	-0.17941	0.944221	9.04493	0.446973
not_annotated	5:46414983-46415161	178	2	9	1	|	2	1	3	||	490	491	348	|	401	169	415	||	0	-0.794669	0.686546	10.6254	0.340978	||	0	-0.342276	0.944221	10.6254	0.426427
Tfdp2	9:96287601-96310688	23087	4	1	0	|	3	2	2	||	473	847	624	|	514	596	1059	||	0	0.849127	0.686546	11.2461	0.341015	||	0	0.267977	0.92876	11.2461	0.37483
DHRSX	GL456216.1:31059-34831	3772	2	1	1	|	2	1	3	||	56	27	48	|	53	29	43	||	0	0.934711	0.691893	7.95157	0.34405	||	0	0.0445663	0.987888	7.95157	0.90982
Fbxw7	3:84903501-84904079	578	10	5	2	|	10	8	1	||	32	40	42	|	29	39	53	||	0	0.490599	0.696422	8.29896	0.347609	||	0	0.208645	0.944221	8.29896	0.438244
Fbxl5	5:43758222-43773659	15437	3	4	2	|	0	1	3	||	120	162	141	|	114	80	82	||	0	-0.834245	0.696422	9.17395	0.347727	||	0	-0.434995	0.740698	9.17395	0.143588
Rb1	14:73262529-73269198	6669	1	1	1	|	3	0	2	||	142	324	293	|	158	218	509	||	0	1.02643	0.696422	10.0952	0.34808	||	0	0.302748	0.940307	10.0952	0.402432
Fam120a	13:48885273-48885878	605	6	3	3	|	5	0	1	||	79	140	126	|	112	134	219	||	0	-0.701331	0.696422	9.37536	0.348129	||	0	0.551784	0.406368	9.37536	0.0318589
Kat6b	14:21626719-21637640	10921	2	0	1	|	4	1	0	||	8	17	17	|	19	6	21	||	0	1.02966	0.696422	6.68497	0.348725	||	0	0.251628	0.947086	6.68497	0.594876
Dnajc5	2:181546371-181547553	1182	10	3	1	|	4	1	2	||	123	133	136	|	128	105	146	||	0	-0.648836	0.696422	9.36666	0.348729	||	0	0.084048	0.961696	9.36666	0.72615
Atxn10	15:85391638-85393506	1868	6	0	0	|	5	2	1	||	172	247	201	|	209	97	170	||	0	0.784693	0.696422	9.69807	0.349258	||	0	-0.2287	0.944221	9.69807	0.478695
Hipk2	6:38818230-38819313	1083	6	3	0	|	4	3	4	||	79	121	117	|	73	58	165	||	0	0.657436	0.696422	9.0577	0.349599	||	0	-0.0269741	0.987924	9.0577	0.925695
Dcaf6	1:165350884-165357546	6662	1	3	1	|	5	2	1	||	117	145	38	|	61	82	186	||	0	0.880154	0.696422	9.01909	0.349738	||	0	0.161349	0.961696	9.01909	0.733575
Tbc1d14	5:36571296-36572037	741	6	2	2	|	4	4	4	||	22	46	39	|	23	49	43	||	0	0.641778	0.696846	7.98748	0.350333	||	0	0.274885	0.944221	7.98748	0.430557
Cbfb	8:105178593-105202547	23954	3	0	1	|	5	0	1	||	141	199	189	|	148	99	116	||	0	0.892084	0.699189	9.41912	0.351894	||	0	-0.367331	0.79892	9.41912	0.198143
Rps6ka5	12:100615997-100619641	3644	11	1	2	|	4	2	1	||	37	53	39	|	32	28	57	||	0	-0.638951	0.700831	8.05218	0.353105	||	0	-0.0342697	0.985324	8.05218	0.900501
Eya3	4:132656693-132673032	16339	10	2	2	|	4	1	2	||	89	114	94	|	71	42	66	||	0	-0.64466	0.703348	8.80213	0.354759	||	0	-0.589678	0.380534	8.80213	0.0263054
Myh9	15:77774557-77774616	59	0	0	4	|	1	2	3	||	284	580	599	|	305	352	752	||	0	0.91143	0.704218	10.7926	0.355584	||	0	0.0446304	0.985324	10.7926	0.899365
Hnrnpu	1:178331398-178331470	72	0	2	1	|	3	1	1	||	1006	1762	1427	|	1030	1063	1813	||	0	1.00018	0.704392	12.0639	0.356058	||	0	0.0191386	0.989186	12.0639	0.953262
Mtmr3	11:4517741-4531305	13564	30	6	10	|	11	7	8	||	238	269	297	|	234	191	410	||	0	-0.403618	0.709085	10.5949	0.358819	||	0	0.139432	0.948693	10.5949	0.597614
Prex1	2:166633366-166647045	13679	3	1	3	|	2	0	1	||	75	68	82	|	68	39	83	||	0	-0.903869	0.710484	8.49536	0.359916	||	0	-0.140799	0.948102	8.49536	0.596722
Rnf214	9:45890804-45900256	9452	2	1	2	|	3	2	2	||	37	56	52	|	14	35	45	||	0	0.80863	0.711906	7.86504	0.361131	||	0	-0.501437	0.735086	7.86504	0.138635
Mboat2	12:24878191-24882794	4603	65	10	17	|	40	9	1	||	115	49	99	|	95	20	65	||	0	-0.618131	0.711906	10.2634	0.361631	||	0	-0.460823	0.944221	10.2634	0.469021
Tubgcp3	8:12624818-12632373	7555	6	1	0	|	7	1	1	||	102	107	101	|	87	91	145	||	0	0.686576	0.711906	9.07158	0.361807	||	0	0.16388	0.944221	9.07158	0.483349
Kdm1a	4:136568573-136577204	8631	5	0	2	|	3	0	0	||	54	78	90	|	69	75	105	||	0	-0.891308	0.712386	8.6438	0.362442	||	0	0.30055	0.793086	8.6438	0.194015
Adam10	9:70703287-70722771	19484	25	4	6	|	14	5	1	||	236	307	266	|	231	159	355	||	0	-0.449499	0.714463	10.4001	0.36389	||	0	-0.0257041	0.988023	10.4001	0.928901
Uty	Y:1102765-1158634	55869	1	0	0	|	4	0	0	||	34	0	57	|	50	0	0	||	0	2.11673	0.717082	7.17487	0.365618	||	0	-0.609953	0.961696	7.17487	0.728316
Ipo8	6:148821595-148824485	2890	4	1	2	|	2	0	1	||	30	27	36	|	28	16	36	||	0	-0.892018	0.718853	7.46708	0.367111	||	0	-0.109836	0.961696	7.46708	0.729232
Rapgef6	11:54543579-54568496	24917	3	2	3	|	4	3	3	||	116	179	168	|	116	113	197	||	0	0.645923	0.718853	9.48802	0.367309	||	0	-0.00180425	0.998257	9.48802	0.993869
Rps6kb1	11:86532772-86535460	2688	14	1	5	|	8	2	1	||	98	110	108	|	93	102	123	||	0	-0.520644	0.723637	9.25753	0.37015	||	0	0.145553	0.944221	9.25753	0.55356
Hivep1	13:42055400-42055542	142	5	1	1	|	2	0	1	||	42	65	51	|	35	25	31	||	0	-0.881187	0.724509	7.88504	0.370993	||	0	-0.639896	0.378507	7.88504	0.0246291
Ubac2	14:121905123-121908320	3197	3	1	0	|	6	0	0	||	89	77	78	|	78	55	54	||	0	0.864921	0.72496	8.56441	0.371622	||	0	-0.225307	0.944221	8.56441	0.492756
Herpud2	9:25124872-25133272	8400	1	0	3	|	6	0	0	||	24	51	47	|	35	27	48	||	0	0.847987	0.728178	7.79318	0.37367	||	0	-0.0105212	0.991639	7.79318	0.973154
Rnf2	1:151476140-151478625	2485	4	1	2	|	2	1	0	||	83	87	78	|	81	73	54	||	0	-0.89276	0.729761	8.63977	0.374883	||	0	-0.0700077	0.975877	8.63977	0.825251
Arl8b	6:108813627-108818613	4986	7	0	0	|	2	1	0	||	90	99	97	|	77	68	89	||	0	-0.86412	0.734516	8.76855	0.377964	||	0	-0.155001	0.944221	8.76855	0.502062
Emb	13:117249272-117249786	514	0	1	2	|	3	0	2	||	655	548	511	|	1144	618	658	||	0	0.980948	0.734516	11.3087	0.378131	||	0	0.660669	0.691086	11.3087	0.105603
Klf7	1:64078707-64079334	627	6	1	0	|	1	2	0	||	30	44	40	|	27	30	51	||	0	-0.863561	0.735061	7.74391	0.378815	||	0	0.0382093	0.984861	7.74391	0.889714
Lyst	13:13752940-13753958	1018	0	1	6	|	2	3	5	||	3	11	12	|	5	11	15	||	0	0.806198	0.739735	6.5524	0.381629	||	0	0.390504	0.944221	6.5524	0.564979
Sik2	9:50995608-50998616	3008	1	3	1	|	2	0	0	||	50	67	94	|	55	41	94	||	0	-1.02893	0.740002	8.39302	0.382172	||	0	-0.0466471	0.982691	8.39302	0.866417
Hbs1l	10:21304530-21307779	3249	5	1	0	|	8	0	0	||	121	123	161	|	110	131	157	||	0	0.709803	0.742239	9.33583	0.383734	||	0	0.11124	0.960131	9.33583	0.678238
Eef2k	7:120891596-120892053	457	2	2	1	|	2	0	0	||	119	148	142	|	109	91	204	||	0	-1.01024	0.753088	9.25636	0.389756	||	0	0.0674016	0.967564	9.25636	0.782963
Sox6	7:115659516-115662444	2928	3	2	5	|	3	2	0	||	237	450	410	|	229	234	703	||	0	-0.735737	0.753926	10.5213	0.39072	||	0	0.140143	0.961696	10.5213	0.696237
Diaph3	14:86905937-86910123	4186	1	2	2	|	1	0	1	||	98	177	138	|	92	137	251	||	0	-1.02137	0.753926	9.36798	0.391016	||	0	0.313591	0.884914	9.36798	0.301266
Gstcd	3:133062566-133085025	22459	5	3	1	|	6	2	3	||	54	53	41	|	57	32	37	||	0	0.610169	0.754912	8.19683	0.391942	||	0	-0.079706	0.972297	8.19683	0.812298
Usp24	4:106400971-106404068	3097	2	0	3	|	2	0	0	||	43	94	94	|	53	78	92	||	0	-1.01292	0.755685	8.55516	0.392757	||	0	0.111125	0.961696	8.55516	0.709952
Ttll5	12:85863564-85879475	15911	5	1	1	|	1	1	1	||	22	34	39	|	16	24	48	||	0	-0.855607	0.756465	7.51089	0.394087	||	0	-0.0140566	0.989922	7.51089	0.968048
Kat6b	14:21516626-21517498	872	5	0	4	|	7	3	1	||	13	14	14	|	16	12	12	||	0	0.60254	0.756465	6.95007	0.394267	||	0	0.111755	0.967734	6.95007	0.788933
Fam120a	13:48932297-48934078	1781	7	7	6	|	9	1	2	||	136	244	231	|	134	156	251	||	0	-0.500252	0.756465	9.91074	0.394407	||	0	-0.0473703	0.982691	9.91074	0.861511
Gnptab	10:88400652-88414598	13946	3	1	1	|	2	0	0	||	27	42	44	|	33	21	34	||	0	-0.995718	0.756867	7.57917	0.396183	||	0	-0.217771	0.944221	7.57917	0.462737
Mark3	12:111592577-111604564	11987	3	1	1	|	2	0	0	||	115	149	133	|	104	79	178	||	0	-0.995787	0.756867	9.16964	0.396243	||	0	-0.0455118	0.982691	9.16964	0.850465
Cdk19	10:40466638-40469955	3317	3	1	1	|	2	0	0	||	93	178	128	|	80	91	107	||	0	-0.99671	0.756867	9.03994	0.397053	||	0	-0.358941	0.764529	9.03994	0.162926
Rfc1	5:65301933-65303208	1275	2	1	2	|	1	1	0	||	148	212	164	|	114	137	229	||	0	-0.99576	0.756867	9.51894	0.397647	||	0	-0.0211218	0.988023	9.51894	0.932651
Acer3	7:98243949-98257777	13828	2	2	1	|	1	1	0	||	127	110	103	|	151	114	151	||	0	-0.999709	0.756867	9.21343	0.397757	||	0	0.416725	0.722373	9.21343	0.129108
Tbpl1	10:22705693-22712091	6398	8	3	1	|	2	6	5	||	68	58	49	|	66	49	58	||	0	0.547476	0.756867	8.54896	0.398576	||	0	0.116992	0.961696	8.54896	0.715619
Usp34	11:23354845-23355098	253	3	1	1	|	2	0	0	||	77	168	149	|	62	81	131	||	0	-0.999138	0.756867	9.00309	0.399151	||	0	-0.391387	0.773293	9.00309	0.173753
Ubqln1	13:58191722-58199070	7348	7	3	0	|	4	1	0	||	66	75	76	|	52	34	68	||	0	-0.670968	0.756867	8.42463	0.39928	||	0	-0.380485	0.70045	8.42463	0.111537
Mllt10	2:18092784-18126229	33445	6	5	2	|	5	1	1	||	77	96	57	|	52	40	82	||	0	-0.599287	0.756867	8.60016	0.399543	||	0	-0.306678	0.878017	8.60016	0.274406
Ddx27	2:167019627-167020714	1087	1	2	2	|	0	0	2	||	94	66	79	|	101	108	119	||	0	-0.998233	0.756867	8.87199	0.39965	||	0	0.580636	0.491322	8.87199	0.0468696
Ptbp3	4:59514274-59546182	31908	6	3	1	|	9	2	1	||	265	410	344	|	300	292	425	||	0	0.559337	0.756867	10.4842	0.399787	||	0	0.135343	0.944221	10.4842	0.583327
Ywhae	11:75751881-75759428	7547	3	0	2	|	2	0	0	||	222	315	256	|	216	125	207	||	0	-0.996227	0.756867	9.87501	0.400632	||	0	-0.388382	0.763638	9.87501	0.161246
Vps13b	15:35417511-35423297	5786	3	0	2	|	2	0	0	||	190	336	317	|	155	166	330	||	0	-0.996253	0.756867	9.97948	0.400666	||	0	-0.268243	0.901905	9.97948	0.331419
Camsap1	2:25952678-25966948	14270	3	1	1	|	1	1	0	||	20	23	26	|	16	22	29	||	0	-0.984048	0.756867	7.13831	0.400937	||	0	0.0806237	0.971579	7.13831	0.800522
Pip5k1b	19:24439053-24443688	4635	3	0	2	|	7	0	0	||	81	84	66	|	62	28	91	||	0	0.749149	0.756867	8.49933	0.402241	||	0	-0.285206	0.937994	8.49933	0.397516
Rad18	6:112679917-112681676	1759	4	0	1	|	2	0	0	||	112	124	98	|	117	113	169	||	0	-0.982653	0.756867	9.15309	0.402299	||	0	0.369716	0.70537	9.15309	0.121535
Prim2	1:33628395-33630433	2038	19	3	2	|	9	4	0	||	274	205	258	|	264	179	330	||	0	-0.496726	0.756867	10.2553	0.402492	||	0	0.158535	0.955694	10.2553	0.628177
Zdhhc21	4:82835446-82854115	18669	3	1	1	|	2	0	0	||	18	20	21	|	19	18	12	||	0	-1.00336	0.756867	6.90523	0.402697	||	0	-0.0908496	0.975877	6.90523	0.826368
Pold3	7:100088064-100093484	5420	4	1	0	|	2	0	0	||	108	132	92	|	102	119	176	||	0	-0.984025	0.756867	9.14195	0.403171	||	0	0.367372	0.753539	9.14195	0.148725
Zranb1	7:132949585-132973623	24038	3	2	0	|	0	1	1	||	90	90	106	|	101	90	143	||	0	-0.976231	0.756867	8.9506	0.403728	||	0	0.337992	0.731098	8.9506	0.132595
Cnot6l	5:96106216-96134132	27916	6	3	1	|	4	0	1	||	58	84	87	|	46	65	46	||	0	-0.6861	0.756867	8.49137	0.403756	||	0	-0.35183	0.857679	8.49137	0.248498
Nudcd3	11:6193154-6193476	322	14	8	1	|	9	1	3	||	73	89	62	|	88	45	45	||	0	-0.529121	0.756867	8.8564	0.403965	||	0	-0.145629	0.961696	8.8564	0.719478
Lbr	1:181831542-181832232	690	3	1	1	|	2	0	0	||	1097	1314	1230	|	1067	679	1774	||	0	-1.0053	0.756867	11.9001	0.404296	||	0	0.0226452	0.98858	11.9001	0.946305
Mapkap1	2:34432003-34444406	12403	15	2	2	|	4	4	2	||	99	111	95	|	79	50	70	||	0	-0.513673	0.756867	8.97945	0.404609	||	0	-0.47401	0.665291	8.97945	0.0977511
Pgam5	5:110265512-110267265	1753	2	1	2	|	1	0	1	||	113	83	75	|	111	66	81	||	0	-1.00076	0.756867	8.78427	0.40499	||	0	0.0611587	0.982691	8.78427	0.859593
Sox6	7:115659516-115701785	42269	2	1	2	|	1	1	0	||	223	296	351	|	187	206	620	||	0	-1.00272	0.758125	10.2494	0.406465	||	0	0.252112	0.944221	10.2494	0.469431
Spata1	3:146463185-146493843	30658	3	1	1	|	1	0	1	||	7	12	12	|	9	12	11	||	0	-0.981301	0.758125	6.34857	0.406897	||	0	0.190307	0.957987	6.34857	0.662629
Cacna1e	1:154700371-154725920	25549	5	0	0	|	2	0	0	||	42	62	52	|	10	7	16	||	0	-0.972468	0.758125	7.48195	0.40691	||	0	-2.09875	1.58386e-07	7.48195	1.38027e-10
Spire1	18:67519291-67530484	11193	2	0	3	|	1	0	1	||	113	161	182	|	97	140	333	||	0	-0.99663	0.75898	9.52221	0.407785	||	0	0.377916	0.877405	9.52221	0.268898
Sec63	10:42783442-42791291	7849	4	0	1	|	1	0	1	||	38	69	56	|	59	49	58	||	0	-0.970252	0.75956	8.17836	0.408558	||	0	0.188889	0.944221	8.17836	0.479584
Rad52	6:119920110-119921028	918	20	3	10	|	12	5	3	||	41	39	33	|	28	22	31	||	0	-0.382028	0.75956	8.45283	0.409278	||	0	-0.356186	0.850526	8.45283	0.230778
Lamp2	X:38430918-38442140	11222	0	3	0	|	1	0	0	||	238	211	221	|	339	232	237	||	0	-1.30543	0.75956	10.0203	0.410005	||	0	0.433593	0.793086	10.0203	0.193686
Canx	11:50307470-50308929	1459	4	1	0	|	2	0	0	||	637	720	781	|	758	700	797	||	0	-0.982105	0.75956	11.3366	0.410116	||	0	0.234141	0.944221	11.3366	0.42374
Cabin1	10:75694715-75700095	5380	3	0	2	|	0	2	0	||	53	81	82	|	59	58	128	||	0	-0.968041	0.75956	8.56021	0.410381	||	0	0.274855	0.879216	8.56021	0.291765
Zmym2	14:56902696-56914168	11472	3	0	2	|	1	0	1	||	69	128	108	|	84	97	77	||	0	-0.977039	0.75956	8.83818	0.410999	||	0	-0.0384248	0.985324	8.83818	0.89814
Cnksr3	10:7152864-7154485	1621	0	0	3	|	1	0	0	||	4	14	18	|	12	10	10	||	0	-1.32301	0.75956	6.32835	0.411728	||	0	0.024478	0.98992	6.32835	0.964772
Mef2a	7:67264865-67268400	3535	4	0	1	|	1	1	0	||	54	83	58	|	41	52	46	||	0	-0.967108	0.75956	8.19629	0.411986	||	0	-0.320685	0.872095	8.19629	0.259719
Spred1	2:117152992-117172086	19094	0	1	2	|	1	0	0	||	28	27	27	|	45	47	28	||	0	-1.30531	0.75956	7.58516	0.412158	||	0	0.738918	0.589149	7.58516	0.0697676
Fbxl17	17:63471408-63490887	19479	4	2	1	|	7	0	2	||	19	40	38	|	32	31	25	||	0	0.645431	0.75956	7.67499	0.412519	||	0	0.0564529	0.982691	7.67499	0.877634
Slc6a9	4:117855875-117857473	1598	3	0	2	|	1	0	1	||	159	145	155	|	141	107	302	||	0	-0.97606	0.75956	9.51651	0.412811	||	0	0.300312	0.891852	9.51651	0.318942
Rbm39	2:156161568-156167750	6182	5	2	0	|	7	2	0	||	721	1003	915	|	805	1149	1051	||	0	0.659057	0.75956	11.6815	0.413094	||	0	0.363791	0.878017	11.6815	0.288068
Epsti1	14:77927170-77939935	12765	4	1	2	|	1	2	0	||	49	56	58	|	59	44	20	||	0	-0.85609	0.762916	8.089	0.415338	||	0	-0.172471	0.961696	8.089	0.692499
Tmbim6	15:99401580-99402169	589	3	1	1	|	1	0	1	||	607	360	503	|	445	328	592	||	0	-0.977051	0.764725	10.8004	0.417154	||	0	-0.0343396	0.987924	10.8004	0.917796
Arih1	9:59426123-59454469	28346	7	5	1	|	4	1	2	||	104	121	145	|	100	118	139	||	0	-0.571746	0.764725	9.29098	0.417161	||	0	0.0917336	0.961696	9.29098	0.709249
Hebp1	6:135152821-135155289	2468	6	2	2	|	5	6	1	||	1030	429	463	|	886	251	774	||	0	0.664198	0.767224	11.2593	0.418944	||	0	0.027148	0.989186	11.2593	0.958963
4932438A13Rik	3:36964875-36975762	10887	4	0	1	|	1	0	1	||	78	152	132	|	69	117	115	||	0	-0.958868	0.76853	9.02035	0.420394	||	0	-0.0916241	0.961696	9.02035	0.760505
Lepr	4:101789263-101792070	2807	1	2	0	|	1	0	0	||	102	70	119	|	145	117	121	||	0	-1.27139	0.76853	9.0502	0.421217	||	0	0.548148	0.635115	9.0502	0.0901836
Tpm3	3:90087457-90087562	105	1	2	0	|	1	0	0	||	358	571	523	|	340	375	539	||	0	-1.26267	0.76853	10.705	0.421308	||	0	-0.073471	0.965408	10.705	0.775785
Parpbp	10:88110299-88114701	4402	1	2	0	|	1	0	0	||	54	83	81	|	54	42	113	||	0	-1.26027	0.76853	8.41873	0.421343	||	0	0.0239024	0.988023	8.41873	0.930384
Jmjd1c	10:67157907-67189849	31942	1	0	2	|	1	0	0	||	78	107	89	|	78	65	75	||	0	-1.25223	0.768602	8.6305	0.422802	||	0	-0.173668	0.944221	8.6305	0.473883
Dcaf6	1:165420111-165429315	9204	1	0	2	|	1	0	0	||	63	99	111	|	78	69	144	||	0	-1.25374	0.768602	8.77081	0.42298	||	0	0.198875	0.944221	8.77081	0.428469
Arfgef2	2:166834471-166836457	1986	1	2	0	|	0	0	1	||	47	64	58	|	53	35	65	||	0	-1.24411	0.768602	8.0969	0.424882	||	0	-0.0193328	0.988023	8.0969	0.936285
Cdc73	1:143691275-143695462	4187	2	1	0	|	1	0	0	||	50	83	81	|	44	49	75	||	0	-1.24335	0.768602	8.29434	0.425167	||	0	-0.218252	0.911796	8.29434	0.350614
Pspc1	14:56748835-56772006	23171	1	2	0	|	0	0	1	||	84	114	83	|	71	78	111	||	0	-1.24434	0.768602	8.74084	0.42533	||	0	0.0119903	0.989186	8.74084	0.958387
Cept1	3:106531137-106539603	8466	5	0	0	|	1	0	1	||	100	77	97	|	87	70	77	||	0	-0.945048	0.768602	8.72079	0.425934	||	0	-0.0860091	0.964973	8.72079	0.770815
Acaca	11:84193079-84195687	2608	2	1	0	|	1	0	0	||	22	25	24	|	23	23	26	||	0	-1.24367	0.768602	7.14104	0.426147	||	0	0.156123	0.955356	7.14104	0.620011
Kansl2	15:98528863-98529453	590	2	0	1	|	1	0	0	||	82	95	70	|	76	56	67	||	0	-1.24173	0.768602	8.51456	0.428474	||	0	-0.163975	0.944221	8.51456	0.549016
Rangap1	15:81716567-81722026	5459	2	1	0	|	1	0	0	||	178	194	195	|	141	130	313	||	0	-1.24455	0.768602	9.64742	0.428697	||	0	0.102244	0.961696	9.64742	0.708716
Scmh1	4:120463075-120483833	20758	2	1	0	|	1	0	0	||	26	46	25	|	16	16	32	||	0	-1.2449	0.768602	7.24781	0.429636	||	0	-0.486566	0.773293	7.24781	0.176074
Tlk1	2:70745934-70750524	4590	2	1	0	|	1	0	0	||	124	221	202	|	117	194	280	||	0	-1.24506	0.768602	9.6406	0.430065	||	0	0.237586	0.944221	9.6406	0.425791
Atp2a2	5:122489238-122491785	2547	2	0	1	|	1	0	0	||	70	121	129	|	73	118	173	||	0	-1.24162	0.768602	9.01452	0.430335	||	0	0.31099	0.878017	9.01452	0.284854
Atxn10	15:85386991-85393506	6515	2	0	1	|	1	0	0	||	162	206	176	|	171	92	151	||	0	-1.24162	0.768602	9.44572	0.430344	||	0	-0.250449	0.933564	9.44572	0.379688
Smg1	7:118178365-118180481	2116	2	1	0	|	1	0	0	||	67	152	153	|	72	111	112	||	0	-1.24534	0.768602	8.98837	0.430787	||	0	-0.149322	0.955694	8.98837	0.639418
Eefsec	6:88355483-88358642	3159	13	5	4	|	10	2	1	||	48	32	50	|	44	23	27	||	0	-0.474629	0.768602	8.24454	0.430997	||	0	-0.318119	0.937719	8.24454	0.396371
Tfdp2	9:96223094-96232748	9654	3	0	0	|	1	0	0	||	37	32	37	|	29	27	47	||	0	-1.23124	0.768602	7.57454	0.431014	||	0	0.0620997	0.975877	7.57454	0.828307
Atxn7	14:13995007-14013655	18648	3	0	0	|	1	0	0	||	22	32	26	|	18	15	20	||	0	-1.23098	0.768602	7.04307	0.43123	||	0	-0.452471	0.764529	7.04307	0.166172
Rad23b	4:55366777-55370472	3695	2	0	1	|	1	0	0	||	140	119	100	|	153	119	136	||	0	-1.24158	0.768602	9.20256	0.431311	||	0	0.320272	0.879216	9.20256	0.290602
Micu2	14:57943588-57955030	11442	2	0	1	|	1	0	0	||	208	171	209	|	244	147	218	||	0	-1.24157	0.768602	9.73771	0.43158	||	0	0.179429	0.944221	9.73771	0.550377
Tpr	1:150428120-150429545	1425	2	0	1	|	1	0	0	||	129	242	229	|	146	237	324	||	0	-1.24157	0.768602	9.81432	0.431639	||	0	0.374001	0.825355	9.81432	0.213579
Slc30a9	5:67324674-67334668	9994	1	0	0	|	0	0	2	||	180	147	143	|	125	78	247	||	0	1.34622	0.768602	9.36907	0.432088	||	0	-0.0362992	0.987888	9.36907	0.914113
Map4k2	19:6341903-6342786	883	2	0	1	|	1	0	0	||	142	155	146	|	75	27	82	||	0	-1.24155	0.768602	8.9022	0.432141	||	0	-1.16931	0.0189002	8.9022	0.000321221
Eif4enif1	11:3220244-3221294	1050	2	0	1	|	0	1	0	||	123	156	166	|	152	130	257	||	0	-1.2292	0.768602	9.46755	0.432336	||	0	0.376958	0.70045	9.46755	0.112133
Psmc6	14:45334653-45343727	9074	2	1	0	|	1	0	0	||	574	389	419	|	518	364	543	||	0	-1.24601	0.768602	10.7832	0.432444	||	0	0.14431	0.957987	10.7832	0.66267
Fgd6	10:94043302-94045633	2331	1	0	0	|	0	1	1	||	19	24	36	|	20	36	34	||	0	1.342	0.768602	7.31455	0.432692	||	0	0.341641	0.921328	7.31455	0.365703
Rock1	18:10129305-10132272	2967	15	0	2	|	8	1	0	||	149	285	249	|	126	148	302	||	0	-0.539156	0.768602	9.92065	0.432934	||	0	-0.147078	0.960131	9.92065	0.676852
Bcl2l13	6:120870766-120876338	5572	1	0	0	|	0	2	0	||	114	77	127	|	93	87	200	||	0	1.33879	0.768602	9.03393	0.433168	||	0	0.306373	0.901905	9.03393	0.331987
Acer3	7:98251890-98266247	14357	2	0	1	|	1	0	0	||	139	75	116	|	158	117	146	||	0	-1.2415	0.768602	9.18043	0.434112	||	0	0.467138	0.773269	9.18043	0.172968
Usp12	5:146751695-146754599	2904	3	0	0	|	1	0	0	||	70	54	54	|	42	31	51	||	0	-1.22744	0.768602	8.02705	0.434266	||	0	-0.417818	0.757679	8.02705	0.156153
Pdpr	8:111128243-111129695	1452	1	0	0	|	0	2	0	||	25	43	45	|	25	30	53	||	0	1.32602	0.768602	7.60818	0.43456	||	0	0.0515448	0.982691	7.60818	0.864462
Trappc6b	12:59050268-59051708	1440	1	0	0	|	0	0	2	||	85	79	70	|	79	62	100	||	0	1.32298	0.768602	8.57703	0.434774	||	0	0.150962	0.944221	8.57703	0.545596
Rab3gap2	1:185266901-185267279	378	3	2	3	|	3	0	1	||	67	80	60	|	65	65	97	||	0	-0.689437	0.768602	8.58401	0.43527	||	0	0.250045	0.878017	8.58401	0.281339
Gfm2	13:97141927-97150413	8486	1	0	0	|	0	2	0	||	28	42	34	|	25	27	34	||	0	1.31797	0.768602	7.44348	0.435475	||	0	-0.137316	0.955356	7.44348	0.62047
Etv6	6:134062068-134066465	4397	2	0	1	|	1	0	0	||	68	44	41	|	38	25	27	||	0	-1.24149	0.768602	7.78169	0.435999	||	0	-0.63434	0.70045	7.78169	0.111893
Cep192	18:67852904-67855375	2471	4	1	3	|	4	0	0	||	54	102	98	|	59	79	118	||	0	-0.697941	0.768602	8.75386	0.436131	||	0	0.14312	0.947086	8.75386	0.590253
Atp11c	X:60304225-60321553	17328	3	0	0	|	0	0	1	||	72	121	81	|	82	92	118	||	0	-1.21764	0.768639	8.79678	0.436721	||	0	0.235093	0.903988	8.79678	0.343201
Rfx7	9:72591751-72593360	1609	12	3	0	|	6	0	2	||	55	70	55	|	46	52	35	||	0	-0.54477	0.768639	8.38169	0.437554	||	0	-0.245129	0.944221	8.38169	0.482962
Wac	18:7901496-7906044	4548	10	4	6	|	9	1	2	||	201	197	194	|	186	138	203	||	0	-0.450922	0.768639	9.89899	0.437685	||	0	-0.0433696	0.982691	9.89899	0.866751
Atxn2	5:121772667-121778105	5438	2	0	1	|	0	0	1	||	36	64	63	|	24	18	53	||	0	-1.22189	0.768639	7.79309	0.438059	||	0	-0.682535	0.443194	7.79309	0.0373173
Ctnna1	18:35222065-35223575	1510	3	0	0	|	0	0	1	||	129	169	116	|	136	103	166	||	0	-1.21445	0.768639	9.25321	0.438672	||	0	0.0920505	0.961696	9.25321	0.714376
Vps41	13:18810432-18814293	3861	1	0	0	|	1	1	0	||	72	120	90	|	81	90	116	||	0	1.31003	0.768639	8.79065	0.438866	||	0	0.169187	0.944221	8.79065	0.470337
Apc	18:34261005-34279352	18347	0	0	1	|	0	2	0	||	30	49	47	|	27	27	28	||	0	1.31149	0.768639	7.5519	0.439102	||	0	-0.458322	0.712722	7.5519	0.125039
Cd24a	10:43583999-43584133	134	2	2	1	|	0	0	2	||	5566	5436	4538	|	5301	3116	5251	||	0	-0.966322	0.768909	13.7473	0.440004	||	0	-0.0694626	0.983007	13.7473	0.878994
Anapc5	5:122791608-122791934	326	2	1	0	|	0	0	1	||	674	594	643	|	786	493	977	||	0	-1.22046	0.768909	11.2504	0.440864	||	0	0.330876	0.878017	11.2504	0.285751
Cdc6	11:98910187-98910777	590	6	1	3	|	2	0	3	||	376	372	357	|	370	222	579	||	0	-0.640531	0.768909	10.5627	0.44125	||	0	0.148074	0.955233	10.5627	0.618492
Rprd1a	18:24506834-24509922	3088	1	0	0	|	2	0	0	||	43	55	48	|	35	28	42	||	0	1.3006	0.768909	7.776	0.441369	||	0	-0.344427	0.773293	7.776	0.176698
Utp20	10:88809082-88810085	1003	5	0	0	|	1	1	0	||	32	51	53	|	50	65	39	||	0	-0.92684	0.768909	8.05	0.441699	||	0	0.3945	0.878017	8.05	0.281896
Nelfb	2:25203141-25206345	3204	1	0	0	|	2	0	0	||	66	79	92	|	83	66	91	||	0	1.30008	0.768909	8.57752	0.441941	||	0	0.158715	0.944221	8.57752	0.491136
Birc2	9:7825615-7827009	1394	1	0	0	|	2	0	0	||	71	93	109	|	96	99	120	||	0	1.2996	0.768909	8.83989	0.442463	||	0	0.354942	0.716752	8.83989	0.126139
Hsp90aa1	12:110692613-110692681	68	0	1	0	|	0	2	0	||	915	1143	1006	|	1070	1087	1254	||	0	1.31362	0.768909	11.8054	0.442629	||	0	0.307753	0.896398	11.8054	0.32456
Asph	4:9508627-9532065	23438	0	0	1	|	2	0	0	||	36	48	42	|	63	48	79	||	0	1.29353	0.769668	8.06975	0.443629	||	0	0.715787	0.0997999	8.06975	0.00246217
Scaper	9:55807013-55859918	52905	0	0	1	|	1	1	0	||	28	49	32	|	17	19	34	||	0	1.29785	0.769668	7.35444	0.444602	||	0	-0.517945	0.693164	7.35444	0.107927
Man2a1	17:64624528-64636655	12127	1	0	0	|	2	0	0	||	58	84	69	|	56	82	66	||	0	1.29679	0.769668	8.41664	0.445578	||	0	0.127485	0.957698	8.41664	0.658299
Nvl	1:181120355-181123984	3629	1	0	0	|	2	0	0	||	87	150	91	|	87	120	161	||	0	1.29669	0.769668	9.03611	0.445684	||	0	0.298018	0.878017	9.03611	0.27968
Atf6	1:170815423-170819432	4009	0	0	1	|	2	0	0	||	80	137	105	|	91	77	103	||	0	1.28798	0.769668	8.83924	0.446931	||	0	-0.0951845	0.961696	8.83924	0.692197
Pik3cb	9:99040921-99042669	1748	1	0	0	|	2	0	0	||	37	25	47	|	37	27	47	||	0	1.2953	0.769668	7.62431	0.447244	||	0	0.133292	0.961696	7.62431	0.691631
Zkscan1	5:138092920-138094139	1219	0	0	1	|	2	0	0	||	44	40	55	|	43	44	51	||	0	1.28735	0.769668	7.91403	0.447308	||	0	0.125562	0.955694	7.91403	0.646936
Kdm5c	X:152253424-152253861	437	3	1	2	|	6	1	1	||	40	122	119	|	50	118	195	||	0	0.673106	0.769668	9.0404	0.447415	||	0	0.490485	0.864605	9.0404	0.254553
Spen	4:141493396-141494398	1002	1	0	0	|	2	0	0	||	34	72	70	|	36	52	97	||	0	1.29503	0.769668	8.19706	0.447557	||	0	0.180913	0.944221	8.19706	0.56949
Fam228b	12:4762327-4764147	1820	2	0	1	|	1	0	0	||	8	3	2	|	5	1	3	||	0	-1.24208	0.769668	5.41879	0.448014	||	0	-0.413469	0.944221	5.41879	0.580495
Vwa8	14:79009164-79026077	16913	0	0	1	|	2	0	0	||	19	25	25	|	30	28	30	||	0	1.28616	0.769668	7.23452	0.448017	||	0	0.496856	0.704264	7.23452	0.117786
Dennd4a	9:64838813-64842689	3876	4	2	2	|	3	1	0	||	316	510	533	|	328	468	764	||	0	-0.694891	0.769668	10.8341	0.448338	||	0	0.311749	0.884914	10.8341	0.297442
Nmd3	3:69730405-69731655	1250	2	0	1	|	0	1	0	||	85	71	61	|	120	99	69	||	0	-1.20917	0.769668	8.71182	0.448551	||	0	0.588104	0.704264	8.71182	0.11842
Pi4ka	16:17348715-17356216	7501	0	0	1	|	2	0	0	||	32	58	62	|	37	26	53	||	0	1.28447	0.769757	7.83937	0.449025	||	0	-0.260661	0.925501	7.83937	0.369388
Map2k5	9:63293524-63322267	28743	0	1	0	|	2	0	0	||	40	60	40	|	39	38	40	||	0	1.28174	0.770844	7.81764	0.450082	||	0	-0.102923	0.961696	7.81764	0.725932
Smad1	8:79371784-79372364	580	2	0	2	|	6	0	0	||	8	5	8	|	10	9	4	||	0	0.784573	0.771034	6.15097	0.45108	||	0	0.30608	0.955588	6.15097	0.624079
Atp8a1	5:67729792-67738482	8690	1	0	0	|	2	0	0	||	163	335	350	|	144	201	398	||	0	1.29179	0.771034	10.0184	0.451267	||	0	-0.0892646	0.96861	10.0184	0.790513
Gfra1	19:58263912-58270163	6251	1	0	0	|	2	0	0	||	19	25	26	|	8	2	3	||	0	1.29162	0.771034	6.49347	0.451461	||	0	-2.21806	0.00104608	6.49347	1.14701e-05
Gatad2b	3:90341656-90341994	338	4	3	1	|	2	1	1	||	30	76	58	|	38	40	61	||	0	-0.675207	0.771498	8.13701	0.452654	||	0	-0.0918286	0.961696	8.13701	0.753394
Ganc	2:120423699-120428897	5198	3	0	0	|	0	1	0	||	25	19	39	|	19	13	25	||	0	-1.19188	0.771498	7.09999	0.452667	||	0	-0.426972	0.878017	7.09999	0.284914
Cep128	12:91347526-91348876	1350	2	1	0	|	0	1	0	||	47	119	102	|	38	80	171	||	0	-1.20722	0.771498	8.73075	0.453001	||	0	0.190894	0.955694	8.73075	0.647611
Eif3l	15:79084112-79085711	1599	1	0	0	|	2	0	0	||	301	182	262	|	398	220	314	||	0	1.28973	0.771681	10.1582	0.453669	||	0	0.444048	0.833137	10.1582	0.222476
Cdc42	4:137328713-137336129	7416	5	1	5	|	5	1	0	||	811	639	635	|	768	353	561	||	0	-0.618498	0.771681	11.2026	0.453955	||	0	-0.183071	0.955694	11.2026	0.63767
Prc1	7:80300301-80301159	858	3	0	0	|	0	0	1	||	586	629	615	|	614	306	958	||	0	-1.18421	0.776584	11.0789	0.457265	||	0	0.0961846	0.965408	11.0789	0.779229
Map2k1	9:64204431-64214609	10178	4	0	4	|	1	1	2	||	59	65	82	|	74	48	88	||	0	-0.657786	0.778856	8.52946	0.459273	||	0	0.149226	0.944221	8.52946	0.548373
Stag1	9:100705153-100712540	7387	6	1	1	|	3	0	1	||	134	145	165	|	149	112	175	||	0	-0.660466	0.778856	9.42245	0.459457	||	0	0.100898	0.960131	9.42245	0.674154
Zfp148	16:33421321-33434974	13653	19	6	4	|	11	4	3	||	53	67	64	|	38	32	45	||	0	-0.347727	0.78096	8.70989	0.461126	||	0	-0.542312	0.402674	8.70989	0.030907
Efnb2	8:8639206-8639489	283	1	0	0	|	2	0	0	||	4	1	2	|	2	0	1	||	0	1.2826	0.781968	4.96937	0.462292	||	0	-0.965347	0.879216	4.96937	0.292269
Asl	5:130016097-130018916	2819	1	0	0	|	2	0	0	||	44	24	25	|	38	16	22	||	0	1.28234	0.781968	7.33439	0.46262	||	0	-0.168706	0.961696	7.33439	0.735365
Rsbn1l	5:20919525-20920162	637	6	5	5	|	9	4	4	||	66	90	75	|	47	46	71	||	0	0.392779	0.781968	8.7763	0.463078	||	0	-0.369379	0.691086	8.7763	0.106982
Glis3	19:28530873-28531986	1113	1	0	0	|	2	0	0	||	5	3	5	|	12	8	4	||	0	1.28169	0.781968	5.77081	0.463436	||	0	1.02976	0.70045	5.77081	0.11095
Mtss1	15:58968839-58972560	3721	6	1	1	|	4	0	0	||	65	110	72	|	41	31	22	||	0	-0.676331	0.784249	8.28414	0.465218	||	0	-1.18311	0.0566028	8.28414	0.00115116
Ccdc6	10:70142579-70154836	12257	2	0	0	|	0	2	1	||	35	59	59	|	24	34	93	||	0	0.974651	0.784973	8.0058	0.466078	||	0	0.0375578	0.987924	8.0058	0.920144
Ap2a1	7:44915841-44916470	629	7	1	0	|	4	0	0	||	50	66	79	|	64	45	135	||	0	-0.658013	0.79126	8.5577	0.470245	||	0	0.391648	0.810785	8.5577	0.206697
Ehmt1	2:24813527-24825067	11540	6	2	3	|	6	6	0	||	47	66	62	|	38	45	53	||	0	0.454118	0.791711	8.36375	0.471331	||	0	-0.222368	0.917494	8.36375	0.361424
Bard1	1:71065479-71075480	10001	2	0	0	|	0	1	2	||	77	86	96	|	68	70	181	||	0	0.950555	0.791711	8.80843	0.47144	||	0	0.353504	0.85179	8.80843	0.233103
Dennd1b	1:139053346-139062971	9625	14	2	1	|	19	0	1	||	67	88	64	|	68	37	52	||	0	0.478143	0.791711	8.77268	0.471815	||	0	-0.321348	0.944221	8.77268	0.497721
Ube2d2a	18:35793465-35801367	7902	14	2	3	|	9	2	0	||	174	203	141	|	145	100	116	||	0	-0.454123	0.791753	9.60571	0.472274	||	0	-0.363606	0.875363	9.60571	0.266396
Adam10	9:70703287-70754325	51038	2	0	0	|	0	3	0	||	241	299	290	|	214	194	394	||	0	0.940708	0.793848	10.0911	0.473958	||	0	0.0396775	0.982691	10.0911	0.87535
Ctif	18:75519739-75521869	2130	0	0	1	|	2	0	0	||	8	7	2	|	4	2	4	||	0	1.24043	0.794999	5.50729	0.475541	||	0	-0.627156	0.914576	5.50729	0.352602
Vps54	11:21263199-21278060	14861	2	0	0	|	0	2	1	||	41	70	56	|	44	52	62	||	0	0.92767	0.794999	8.12885	0.477058	||	0	0.0665335	0.96861	8.12885	0.791549
Brpf3	17:28805929-28807399	1470	2	0	0	|	1	0	2	||	33	50	56	|	32	30	97	||	0	0.941666	0.794999	7.98237	0.479275	||	0	0.246381	0.944221	7.98237	0.489498
Bard1	1:71046678-71053721	7043	2	0	0	|	1	1	1	||	57	102	56	|	43	56	137	||	0	0.942175	0.794999	8.49476	0.479461	||	0	0.196837	0.944221	8.49476	0.571462
Gramd1c	16:44028679-44040158	11479	1	0	2	|	0	1	0	||	4	0	0	|	0	3	1	||	0	-1.21837	0.794999	4.95392	0.480038	||	0	0.0760143	0.988023	4.95392	0.940226
Zranb1	7:132948044-132960734	12690	1	0	1	|	0	0	3	||	22	35	22	|	16	20	27	||	0	0.929154	0.794999	7.14073	0.480082	||	0	-0.195522	0.944221	7.14073	0.574492
Ccnl1	3:65948262-65951554	3292	2	0	0	|	1	0	2	||	182	230	244	|	157	201	223	||	0	0.925477	0.794999	9.7734	0.480835	||	0	-0.0240112	0.987924	9.7734	0.924156
Zranb1	7:132949585-132950435	850	2	0	0	|	1	0	2	||	103	91	89	|	99	99	110	||	0	0.92508	0.794999	8.88653	0.480877	||	0	0.25638	0.901905	8.88653	0.332281
Lcorl	5:45775392-45795358	19966	2	0	0	|	1	0	2	||	47	60	52	|	49	66	57	||	0	0.924683	0.794999	8.17182	0.480918	||	0	0.275673	0.901905	8.17182	0.329033
Wdr7	18:63755036-63760785	5749	2	0	0	|	1	2	0	||	41	76	79	|	36	57	80	||	0	0.926625	0.794999	8.26594	0.480991	||	0	-0.0463877	0.982691	8.26594	0.872942
Lrrc58	16:37877049-37878564	1515	2	0	0	|	1	0	2	||	47	51	54	|	57	43	48	||	0	0.9229	0.794999	8.04863	0.481107	||	0	0.11422	0.961696	8.04863	0.682058
Arhgap10	8:77344640-77365160	20520	7	0	1	|	4	0	0	||	41	34	31	|	28	15	24	||	0	-0.651794	0.794999	7.51636	0.481143	||	0	-0.538366	0.764529	7.51636	0.162491
Etnk1	6:143180587-143197565	16978	2	0	0	|	1	0	2	||	32	55	60	|	31	30	40	||	0	0.921078	0.794999	7.78863	0.481302	||	0	-0.392049	0.764529	7.78863	0.164914
Larp1	11:58040391-58044050	3659	2	0	0	|	1	1	1	||	88	87	77	|	60	78	113	||	0	0.921052	0.794999	8.66609	0.481407	||	0	0.0965706	0.961696	8.66609	0.69984
Riok1	13:38045273-38050310	5037	2	0	0	|	1	0	2	||	91	112	102	|	98	117	141	||	0	0.918672	0.794999	9.01116	0.481565	||	0	0.35954	0.702952	9.01116	0.115655
Smg7	1:152854310-152856611	2301	2	0	0	|	1	2	0	||	51	89	78	|	51	70	80	||	0	0.919951	0.794999	8.43666	0.48162	||	0	0.0344191	0.985175	8.43666	0.891789
Rnf4	5:34342522-34350838	8316	2	4	0	|	3	0	0	||	269	208	233	|	269	242	309	||	0	-0.72785	0.795475	10.0838	0.482504	||	0	0.326017	0.872095	10.0838	0.26075
Mllt10	2:18092784-18146872	54088	5	2	3	|	6	3	2	||	65	95	76	|	54	54	83	||	0	0.458679	0.795475	8.68092	0.483761	||	0	-0.179249	0.944221	8.68092	0.421355
Picalm	7:90189150-90197020	7870	27	4	8	|	12	4	7	||	880	981	957	|	826	843	1342	||	0	-0.344508	0.795475	11.8595	0.483929	||	0	0.201454	0.944221	11.8595	0.511908
Col1a1	11:94948351-94948596	245	0	2	2	|	2	0	0	||	3473	3010	3854	|	7967	428	677	||	0	-1.10168	0.795475	13.2593	0.484042	||	0	0.0575853	0.989186	13.2593	0.952828
Rasa2	9:96591950-96611499	19549	43	3	10	|	25	1	7	||	49	44	41	|	37	24	34	||	0	-0.381651	0.795475	9.2108	0.484089	||	0	-0.366855	0.944221	9.2108	0.439402
Dcaf8	1:172173943-172187460	13517	8	3	2	|	9	0	5	||	154	143	148	|	166	168	265	||	0	0.424991	0.795691	9.77509	0.484826	||	0	0.527428	0.44464	9.77509	0.0377847
Acin1	14:54662168-54667161	4993	1	3	2	|	2	0	1	||	124	223	172	|	90	107	222	||	0	-0.721102	0.795691	9.43998	0.485991	||	0	-0.216457	0.944221	9.43998	0.457378
Adgre1	17:57406834-57420524	13690	2	0	2	|	0	3	2	||	104	90	143	|	147	86	115	||	0	0.70436	0.795691	9.11433	0.486384	||	0	0.199166	0.944221	9.11433	0.538792
Rsbn1	3:103928351-103930154	1803	2	0	0	|	2	0	1	||	23	29	32	|	19	20	35	||	0	0.907881	0.795691	7.2559	0.486391	||	0	-0.0667023	0.975877	7.2559	0.823292
Tbc1d5	17:50917527-50920603	3076	2	0	0	|	2	1	0	||	60	84	70	|	39	52	58	||	0	0.907493	0.795691	8.25957	0.486401	||	0	-0.379683	0.704264	8.25957	0.119779
Rps6kc1	1:190871592-190899571	27979	3	0	0	|	1	2	1	||	27	33	52	|	29	25	35	||	0	0.775641	0.796282	7.58248	0.488107	||	0	-0.189199	0.944221	7.58248	0.554027
Qk	17:10273947-10282981	9034	3	0	0	|	1	1	2	||	177	289	279	|	175	217	288	||	0	0.775057	0.796282	9.94906	0.488132	||	0	0.0127876	0.989186	9.94906	0.960176
Rabgap1l	1:160682041-160702460	20419	1	1	0	|	1	0	2	||	148	188	171	|	106	139	202	||	0	0.908264	0.796282	9.4449	0.488169	||	0	-0.0667343	0.967661	9.4449	0.784893
Ptgr2	12:84298011-84308432	10421	2	0	0	|	2	1	0	||	77	76	53	|	80	49	78	||	0	0.911707	0.796282	8.43528	0.488932	||	0	0.125864	0.960131	8.43528	0.67128
Erbin	13:103884143-103889285	5142	20	4	6	|	15	2	2	||	89	127	148	|	110	112	121	||	0	-0.347931	0.796282	9.57366	0.488945	||	0	0.0844627	0.961696	9.57366	0.767046
Ipo11	13:106842089-106848336	6247	2	0	0	|	3	0	0	||	60	93	87	|	84	80	128	||	0	0.898717	0.796466	8.72596	0.48993	||	0	0.40953	0.538681	8.72596	0.0593612
Blvrb	7:27459256-27459652	396	1	0	0	|	2	0	0	||	3739	1149	1233	|	2910	657	1684	||	0	1.26228	0.796466	12.5514	0.490093	||	0	-0.169949	0.971579	12.5514	0.804465
Cercam	2:29872563-29873012	449	6	1	2	|	5	4	1	||	46	28	45	|	40	23	77	||	0	0.510013	0.796466	8.07999	0.491007	||	0	0.271629	0.944221	8.07999	0.455067
Pip5k1b	19:24355118-24360151	5033	4	0	0	|	2	1	2	||	79	73	82	|	75	44	122	||	0	0.685159	0.796466	8.63233	0.491309	||	0	0.112269	0.961696	8.63233	0.692724
Trpm7	2:126797467-126799234	1767	2	0	0	|	3	0	0	||	68	102	89	|	76	97	124	||	0	0.897756	0.796466	8.78645	0.491581	||	0	0.334037	0.757679	8.78645	0.153285
Crebbp	16:4179424-4180133	709	3	0	0	|	1	2	1	||	68	113	111	|	77	76	109	||	0	0.761161	0.796466	8.79922	0.491678	||	0	-0.0146347	0.989186	8.79922	0.949257
Tasp1	2:140042094-140057499	15405	17	1	5	|	16	4	3	||	44	46	43	|	53	54	54	||	0	0.341354	0.797555	8.69863	0.492788	||	0	0.424578	0.757679	8.69863	0.154411
Rsrp1	4:134924427-134924482	55	1	1	0	|	1	0	2	||	443	536	434	|	496	203	337	||	0	0.916015	0.800503	10.6109	0.495201	||	0	-0.29207	0.944221	10.6109	0.422152
Trappc9	15:72999972-73031643	31671	1	1	0	|	3	0	0	||	40	53	62	|	29	37	50	||	0	0.88698	0.800503	7.89746	0.496454	||	0	-0.287002	0.878017	7.89746	0.272335
Lsm14a	7:34351286-34353847	2561	1	1	0	|	2	1	0	||	113	231	179	|	143	150	217	||	0	0.893179	0.800503	9.53697	0.496664	||	0	0.112351	0.960131	9.53697	0.666825
Pum1	4:130768816-130774604	5788	3	0	0	|	2	2	0	||	61	103	97	|	58	89	125	||	0	0.75802	0.800503	8.74775	0.497046	||	0	0.187932	0.944221	8.74775	0.483288
Vars	17:35013265-35013747	482	3	2	1	|	3	0	0	||	136	194	223	|	119	133	245	||	0	-0.695549	0.800503	9.58187	0.497894	||	0	-0.0493189	0.982691	9.58187	0.849004
Gab1	8:80800101-80800395	294	2	1	0	|	1	3	0	||	28	23	21	|	28	17	25	||	0	0.766302	0.800503	7.20397	0.498338	||	0	0.0818625	0.975877	7.20397	0.829282
Usf3	16:44198904-44205080	6176	3	1	2	|	3	0	0	||	46	50	48	|	36	46	57	||	0	-0.683427	0.800503	8.02982	0.499348	||	0	0.0742831	0.961696	8.02982	0.7662
Zfp609	9:65794622-65795495	873	2	2	3	|	1	3	4	||	5	13	13	|	9	11	15	||	0	0.55055	0.800503	6.61854	0.499633	||	0	0.311303	0.944221	6.61854	0.506467
Taok1	11:77571607-77585494	13887	3	0	2	|	2	2	2	||	76	110	130	|	70	107	119	||	0	0.610893	0.800503	8.97852	0.499759	||	0	0.0577562	0.976725	8.97852	0.830538
Tmcc1	6:116133767-116138250	4483	0	2	0	|	1	0	2	||	53	94	100	|	54	30	42	||	0	0.88933	0.800503	8.28491	0.500195	||	0	-0.794686	0.235704	8.28491	0.0106612
Mtmr3	11:4546189-4549356	3167	1	2	0	|	0	4	0	||	37	94	78	|	60	92	134	||	0	0.764872	0.800503	8.66159	0.500202	||	0	0.592275	0.605032	8.66159	0.0750767
Pcnt	10:76367308-76370079	2771	2	0	0	|	3	0	0	||	35	68	61	|	33	47	101	||	0	0.89288	0.800503	8.16631	0.500282	||	0	0.230407	0.944221	8.16631	0.485269
Phip	9:82926397-82933067	6670	3	1	2	|	2	0	5	||	109	257	202	|	99	159	187	||	0	0.583269	0.800503	9.58802	0.500314	||	0	-0.185334	0.944221	9.58802	0.573428
Ubqln1	13:58177851-58183324	5473	4	0	0	|	3	2	0	||	83	103	94	|	71	53	99	||	0	0.657544	0.801409	8.7038	0.501364	||	0	-0.213812	0.903967	8.7038	0.336007
Wdr36	18:32861027-32863262	2235	2	0	0	|	3	0	0	||	102	95	89	|	116	98	79	||	0	0.892007	0.801409	8.87288	0.501901	||	0	0.209914	0.944221	8.87288	0.523585
Rlf	4:121170618-121190258	19640	0	0	3	|	0	1	3	||	61	88	97	|	58	71	102	||	0	0.743482	0.801409	8.62198	0.502199	||	0	0.0382404	0.982691	8.62198	0.873509
Ngly1	14:16290771-16294673	3902	0	2	0	|	2	1	0	||	65	83	63	|	75	62	64	||	0	0.877977	0.801868	8.43969	0.503205	||	0	0.0916016	0.961696	8.43969	0.737135
Smg6	11:75038613-75042036	3423	0	2	0	|	1	2	0	||	39	82	74	|	33	49	103	||	0	0.884733	0.801868	8.28626	0.505028	||	0	0.017822	0.989186	8.28626	0.957645
Ipo5	14:120917356-120923585	6229	1	1	0	|	3	0	0	||	220	219	220	|	248	166	264	||	0	0.876561	0.801868	9.8729	0.505191	||	0	0.163452	0.944221	9.8729	0.536789
Rest	5:77267932-77268823	891	3	0	0	|	3	1	0	||	25	30	41	|	22	31	33	||	0	0.744093	0.801868	7.47243	0.505247	||	0	-0.0145823	0.989893	7.47243	0.963542
Rps6kc1	1:190885334-190899571	14237	3	2	0	|	2	1	3	||	29	29	52	|	36	23	29	||	0	0.614842	0.801868	7.65349	0.50553	||	0	-0.163244	0.955694	7.65349	0.651276
Rreb1	13:37888871-37899787	10916	6	3	1	|	9	1	1	||	43	56	69	|	48	39	62	||	0	0.438972	0.801868	8.34346	0.505812	||	0	-0.0417657	0.982691	8.34346	0.866631
Nhlrc2	19:56574758-56576284	1526	7	4	4	|	5	1	3	||	43	57	69	|	54	44	76	||	0	-0.419251	0.801868	8.4827	0.505818	||	0	0.166092	0.944221	8.4827	0.481596
Abraxas1	5:100805898-100812202	6304	1	0	1	|	2	1	0	||	34	34	20	|	43	36	29	||	0	0.889671	0.801868	7.55664	0.50648	||	0	0.458783	0.864605	7.55664	0.253628
Lmtk2	5:144182737-144183421	684	2	0	0	|	3	0	0	||	30	39	45	|	11	22	49	||	0	0.889298	0.801868	7.48671	0.507055	||	0	-0.406482	0.891852	7.48671	0.317392
Fam117a	11:95363999-95375763	11764	2	0	0	|	3	0	0	||	145	290	235	|	161	193	529	||	0	0.889165	0.801868	9.99529	0.507313	||	0	0.45514	0.812442	9.99529	0.207565
Nrip1	16:76367648-76368101	453	2	0	1	|	2	2	0	||	8	13	14	|	12	22	21	||	0	0.748967	0.801868	6.70509	0.508714	||	0	0.790267	0.556474	6.70509	0.0640677
Tmem120b	5:123099837-123104511	4674	3	0	0	|	3	0	1	||	100	62	93	|	95	58	143	||	0	0.748969	0.801868	8.79765	0.508756	||	0	0.273462	0.940307	8.79765	0.402038
Sf3b3	8:110820707-110821590	883	4	0	1	|	4	1	1	||	185	223	254	|	212	208	271	||	0	0.594464	0.801868	9.93157	0.509091	||	0	0.203948	0.937719	9.93157	0.395963
Eif4enif1	11:3203630-3230101	26471	0	1	2	|	1	1	2	||	98	95	113	|	97	92	153	||	0	0.731133	0.801868	9.00446	0.509167	||	0	0.265519	0.856165	9.00446	0.246527
Acer3	7:98243949-98266247	22298	9	0	1	|	1	0	4	||	149	103	136	|	162	135	167	||	0	-0.554054	0.801868	9.43884	0.509303	||	0	0.381117	0.856165	9.43884	0.23863
Msh3	13:92299153-92312686	13533	2	0	1	|	3	0	1	||	37	53	68	|	43	49	57	||	0	0.731691	0.801868	8.09074	0.50966	||	0	0.0655252	0.971579	8.09074	0.805481
Sgms1	19:32159524-32160363	839	1	0	2	|	2	1	1	||	110	111	88	|	81	73	112	||	0	0.731792	0.801868	8.85899	0.50996	||	0	-0.107008	0.957987	8.85899	0.662843
Rbm33	5:28331111-28342514	11403	1	2	0	|	2	1	1	||	58	102	85	|	59	73	105	||	0	0.728806	0.802016	8.6294	0.510633	||	0	0.084785	0.961696	8.6294	0.723539
Snx25	8:46103515-46105291	1776	1	0	2	|	3	1	0	||	40	47	50	|	25	25	32	||	0	0.72465	0.802016	7.68354	0.511436	||	0	-0.604841	0.372774	7.68354	0.0235537
Tfrc	16:32620366-32621297	931	1	0	1	|	2	1	0	||	2394	2110	2597	|	1779	1219	3020	||	0	0.886932	0.802016	12.6654	0.511554	||	0	-0.179571	0.955694	12.6654	0.642768
Btbd7	12:102807900-102812843	4943	3	1	1	|	3	3	0	||	32	48	61	|	26	39	43	||	0	0.592942	0.802016	7.90372	0.511813	||	0	-0.233952	0.944221	7.90372	0.436978
Anapc5	5:122793437-122794491	1054	8	0	0	|	3	0	1	||	660	559	648	|	654	458	938	||	0	-0.606419	0.802105	11.1977	0.513043	||	0	0.214175	0.944221	11.1977	0.506492
Nemf	12:69320373-69322350	1977	3	2	1	|	2	0	1	||	70	101	84	|	41	110	119	||	0	-0.687361	0.802105	8.76765	0.51352	||	0	0.215954	0.944221	8.76765	0.535687
Spata13	14:60706714-60709569	2855	3	1	0	|	3	1	1	||	7	10	10	|	10	5	15	||	0	0.652166	0.802105	6.30341	0.513993	||	0	0.255829	0.944221	6.30341	0.573671
Lbr	1:181828712-181831734	3022	0	0	2	|	2	0	1	||	766	691	906	|	687	545	1229	||	0	0.867948	0.802105	11.416	0.51414	||	0	0.1257	0.961696	11.416	0.692458
Kdm4c	4:74306965-74315649	8684	6	2	1	|	5	0	0	||	56	71	74	|	53	38	65	||	0	-0.529702	0.802105	8.36695	0.514386	||	0	-0.238213	0.885687	8.36695	0.307484
Picalm	7:90160448-90174533	14085	3	1	1	|	3	2	1	||	619	740	806	|	733	618	1032	||	0	0.594832	0.802105	11.3811	0.514655	||	0	0.256335	0.904279	11.3811	0.345643
Ccar1	10:62770855-62772065	1210	2	0	1	|	3	0	1	||	108	190	165	|	95	147	165	||	0	0.729505	0.802105	9.35155	0.51536	||	0	-0.028527	0.987924	9.35155	0.91803
Canx	11:50299129-50301054	1925	3	1	1	|	3	1	2	||	410	618	573	|	596	649	628	||	0	0.596353	0.802105	11.0791	0.516416	||	0	0.41069	0.757679	11.0791	0.15852
Azin1	15:38498669-38501600	2931	0	2	0	|	2	1	0	||	347	625	651	|	400	373	825	||	0	0.861312	0.802105	10.9033	0.516539	||	0	0.0766885	0.971579	10.9033	0.804057
Vps16	2:130439620-130440579	959	3	0	2	|	4	1	1	||	81	83	81	|	105	91	103	||	0	0.582469	0.802105	8.85962	0.51662	||	0	0.43333	0.620205	8.85962	0.0853462
Cntln	4:84971131-84979521	8390	7	0	0	|	2	0	1	||	35	59	10	|	19	43	49	||	0	-0.736458	0.802105	7.71871	0.516854	||	0	0.213872	0.961696	7.71871	0.721992
Trappc11	8:47513283-47514877	1594	5	0	1	|	7	0	0	||	58	64	59	|	54	53	62	||	0	0.533254	0.802105	8.34577	0.518072	||	0	0.0391486	0.982691	8.34577	0.875524
Pias2	18:77097249-77105889	8640	3	0	1	|	4	1	0	||	26	39	37	|	36	34	33	||	0	0.63919	0.802105	7.65865	0.518388	||	0	0.177397	0.944221	7.65865	0.561776
Eif3c	7:126551975-126552338	363	3	0	0	|	4	0	0	||	257	208	252	|	243	272	284	||	0	0.727698	0.802105	10.0548	0.518568	||	0	0.294469	0.888683	10.0548	0.311606
Mertk	2:128736563-128738369	1806	3	0	3	|	2	1	0	||	18	24	30	|	29	38	24	||	0	-0.679241	0.802105	7.41376	0.518653	||	0	0.531187	0.773293	7.41376	0.179333
Memo1	17:74241905-74258505	16600	13	4	1	|	17	3	0	||	423	290	324	|	422	247	461	||	0	0.402903	0.802105	10.6683	0.519461	||	0	0.209326	0.949762	10.6683	0.605173
Alg13	X:144346682-144349419	2737	11	2	1	|	6	1	1	||	20	21	15	|	12	19	22	||	0	-0.452127	0.802105	7.25827	0.520003	||	0	0.0400588	0.987924	7.25827	0.919937
Clasp1	1:118419440-118419918	478	4	0	2	|	1	0	2	||	107	158	145	|	95	70	131	||	0	-0.653596	0.802105	9.1085	0.520012	||	0	-0.347173	0.717264	9.1085	0.127663
Anp32b	4:46460090-46468787	8697	4	2	0	|	2	0	1	||	100	174	126	|	105	118	258	||	0	-0.665659	0.802105	9.36451	0.520225	||	0	0.34942	0.846267	9.36451	0.228269
Rprd1b	2:158035996-158050213	14217	1	1	1	|	3	0	1	||	51	52	79	|	36	41	77	||	0	0.715143	0.802827	8.18368	0.521133	||	0	-0.143324	0.949762	8.18368	0.609178
Mbtd1	11:93905159-93912458	7299	2	0	1	|	3	1	0	||	40	74	61	|	67	48	39	||	0	0.72636	0.803115	8.19051	0.522643	||	0	0.026655	0.988023	8.19051	0.939376
Timeless	10:128242310-128242718	408	4	1	1	|	1	1	1	||	56	50	73	|	53	67	106	||	0	-0.652474	0.803115	8.45284	0.52276	||	0	0.436391	0.664027	8.45284	0.0971897
Anln	9:22376137-22376522	385	4	1	1	|	2	1	0	||	155	240	177	|	83	75	206	||	0	-0.662468	0.803115	9.42564	0.523657	||	0	-0.589291	0.504966	9.42564	0.0503858
Bbs9	9:22887581-22887996	415	7	1	1	|	7	2	1	||	17	15	14	|	22	6	17	||	0	0.49236	0.803115	7.01904	0.523848	||	0	0.0811031	0.982691	7.01904	0.865883
Usp7	16:8710039-8716619	6580	2	0	2	|	3	2	0	||	179	256	271	|	156	156	368	||	0	0.637689	0.803115	9.90899	0.524273	||	0	0.0210886	0.988023	9.90899	0.940761
Neil3	8:53608715-53609538	823	2	1	0	|	3	1	0	||	151	239	141	|	151	166	392	||	0	0.722505	0.803115	9.75982	0.52447	||	0	0.479816	0.731098	9.75982	0.133739
Zfyve1	12:83574632-83575136	504	1	0	2	|	3	1	0	||	58	56	68	|	61	31	94	||	0	0.713004	0.803115	8.29483	0.524703	||	0	0.10702	0.961696	8.29483	0.719354
Pcbp2	15:102473261-102478747	5486	1	2	0	|	3	1	0	||	211	283	253	|	187	122	265	||	0	0.710302	0.803115	9.8489	0.52492	||	0	-0.275903	0.878017	9.8489	0.281195
Hipk3	2:104470749-104471847	1098	11	4	8	|	6	5	11	||	47	56	75	|	51	53	68	||	0	0.311619	0.803115	8.85815	0.525476	||	0	0.0903851	0.961696	8.85815	0.739657
Ppm1b	17:84993680-84994539	859	0	1	2	|	3	0	1	||	117	131	170	|	127	130	203	||	0	0.705362	0.803115	9.36899	0.525724	||	0	0.255748	0.878017	9.36899	0.286283
Mettl6	14:31482791-31492456	9665	2	2	2	|	4	2	1	||	75	91	80	|	80	78	75	||	0	0.526913	0.80364	8.73245	0.526508	||	0	0.0843564	0.961696	8.73245	0.743316
Zgrf1	3:127567628-127573325	5697	2	1	0	|	3	0	1	||	19	34	50	|	34	64	100	||	0	0.721332	0.804712	8.05426	0.52766	||	0	1.05428	0.148179	8.05426	0.00487431
Ssbp2	13:91524585-91564694	40109	5	0	1	|	3	0	0	||	155	91	122	|	137	98	142	||	0	-0.659835	0.804712	9.20988	0.529014	||	0	0.136528	0.960131	9.20988	0.679446
Cdk13	13:17763104-17772957	9853	7	5	3	|	4	4	1	||	53	102	102	|	70	101	100	||	0	-0.4157	0.804712	8.97676	0.529369	||	0	0.252836	0.933564	8.97676	0.379596
Ap3d1	10:80712112-80715179	3067	2	0	2	|	4	1	0	||	56	80	115	|	57	74	100	||	0	0.624428	0.804712	8.65393	0.529403	||	0	0.0190925	0.988023	8.65393	0.944996
Vps13c	9:67852491-67860885	8394	5	0	1	|	2	1	0	||	95	84	102	|	76	91	83	||	0	-0.646662	0.804712	8.79979	0.529893	||	0	-0.0156482	0.989186	8.79979	0.955611
Prmt9	8:77563976-77565146	1170	6	0	3	|	4	1	0	||	48	69	53	|	52	62	56	||	0	-0.518877	0.804712	8.33414	0.530208	||	0	0.164958	0.944221	8.33414	0.548554
Mrps18b	17:35914334-35914804	470	3	0	0	|	3	1	0	||	177	67	61	|	127	66	55	||	0	0.772804	0.804712	8.8674	0.530298	||	0	-0.175236	0.961696	8.8674	0.755898
Tmsb4x	X:167207275-167207405	130	2	0	0	|	3	0	0	||	7003	6580	6105	|	7157	2993	4910	||	0	0.877949	0.805517	13.9825	0.53127	||	0	-0.245809	0.955694	13.9825	0.641186
Psmd14	2:61720444-61722761	2317	4	1	4	|	3	0	2	||	375	286	234	|	365	245	309	||	0	-0.541107	0.806708	10.3327	0.532507	||	0	0.161072	0.955694	10.3327	0.637899
Rere	4:150406196-150406664	468	5	7	0	|	2	4	1	||	37	72	47	|	29	24	33	||	0	-0.454103	0.806708	8.00918	0.53307	||	0	-0.703661	0.38138	8.00918	0.0267635
Top2a	11:99009590-99010599	1009	0	1	1	|	3	0	0	||	746	1153	1190	|	700	737	1593	||	0	0.831645	0.806708	11.69	0.533382	||	0	0.0578392	0.982691	11.69	0.863175
Tpr	1:150406462-150407577	1115	1	2	0	|	3	1	0	||	140	266	199	|	165	253	267	||	0	0.701254	0.807283	9.84316	0.534206	||	0	0.347857	0.856165	9.84316	0.240333
Ncoa6	2:155432816-155440785	7969	1	2	0	|	3	0	1	||	25	42	29	|	22	17	52	||	0	0.699318	0.809962	7.47423	0.536422	||	0	-0.000558196	0.999047	7.47423	0.999047
Adgre1	17:57406834-57408495	1661	2	0	1	|	4	0	0	||	124	94	166	|	172	102	136	||	0	0.70127	0.811451	9.26682	0.538211	||	0	0.242586	0.944221	9.26682	0.473505
Papola	12:105826944-105829277	2333	2	0	2	|	5	0	0	||	219	327	287	|	189	193	222	||	0	0.610566	0.811451	9.97877	0.538298	||	0	-0.301464	0.85179	9.97877	0.234429
Hist1h1c	13:23739239-23739466	227	4	0	2	|	3	0	0	||	7101	4661	4300	|	7256	3384	5051	||	0	-0.70319	0.81372	13.8877	0.540249	||	0	0.0819047	0.983222	13.8877	0.880692
Mapk1	16:17013308-17016080	2772	10	1	2	|	6	2	5	||	233	241	250	|	193	151	228	||	0	0.377641	0.815212	10.0042	0.541687	||	0	-0.21618	0.934366	10.0042	0.389577
Hectd1	12:51772274-51772705	431	6	1	5	|	4	1	2	||	120	178	216	|	131	235	357	||	0	-0.456491	0.816857	9.87844	0.543228	||	0	0.603438	0.535321	9.87844	0.0586975
Gas2	7:51887912-51897372	9460	1	2	1	|	3	0	2	||	15	8	12	|	28	19	31	||	0	0.610292	0.817497	7.00387	0.544605	||	0	1.24898	0.0877483	7.00387	0.00206863
Calm1	12:100206174-100206233	59	1	3	0	|	2	0	0	||	2401	1941	1510	|	1823	704	1066	||	0	-0.800354	0.817497	12.2927	0.544814	||	0	-0.566544	0.869332	12.2927	0.257368
Hectd4	5:121263885-121266405	2520	5	1	0	|	3	0	0	||	128	263	284	|	109	215	527	||	0	-0.662608	0.817497	9.99794	0.544998	||	0	0.390708	0.928206	9.99794	0.373522
Socs7	11:97377936-97378711	775	2	1	2	|	5	0	1	||	20	17	17	|	17	21	22	||	0	0.54802	0.818002	7.05489	0.54609	||	0	0.278563	0.944221	7.05489	0.447992
Rab2a	4:8577955-8582493	4538	2	1	0	|	4	0	0	||	360	277	291	|	400	233	283	||	0	0.691886	0.818002	10.2998	0.546231	||	0	0.123948	0.961696	10.2998	0.724537
Zbtb7a	10:81143962-81145217	1255	0	0	3	|	3	1	0	||	35	63	50	|	43	20	71	||	0	0.682646	0.818345	7.95998	0.546922	||	0	-0.0542299	0.982691	7.95998	0.876171
Spata5	3:37448408-37464658	16250	4	1	1	|	1	0	2	||	52	86	63	|	71	81	47	||	0	-0.633385	0.818345	8.47102	0.547358	||	0	0.207623	0.944221	8.47102	0.558481
Pbrm1	14:31030844-31036059	5215	6	0	0	|	2	0	1	||	135	224	240	|	131	141	304	||	0	-0.623085	0.819719	9.70365	0.548727	||	0	0.0357027	0.985671	9.70365	0.903831
Gpsm2	3:108711277-108711580	303	10	0	1	|	5	1	0	||	90	80	114	|	75	33	130	||	0	-0.488743	0.820429	8.8293	0.549651	||	0	-0.209255	0.946354	8.8293	0.58784
Rbm33	5:28358274-28368313	10039	11	2	1	|	4	1	3	||	43	92	81	|	38	61	97	||	0	-0.416512	0.821492	8.63226	0.550814	||	0	-0.016281	0.989186	8.63226	0.95886
Phkb	8:85875634-85901957	26323	1	1	3	|	4	1	1	||	32	43	31	|	26	31	23	||	0	0.541553	0.825587	7.59115	0.554012	||	0	-0.232839	0.944221	7.59115	0.502415
Ckap5	2:91546322-91560911	14589	4	1	1	|	6	1	0	||	187	235	287	|	110	151	353	||	0	0.511598	0.827102	9.87768	0.555483	||	0	-0.151868	0.955694	9.87768	0.648028
Zcchc11	4:108478873-108486617	7744	0	2	2	|	2	0	0	||	90	162	113	|	54	80	64	||	0	-0.732108	0.829834	8.81228	0.557772	||	0	-0.691293	0.380534	8.81228	0.026115
Fgfr2	7:130218998-130228792	9794	1	1	0	|	3	0	0	||	73	25	36	|	86	49	42	||	0	0.81347	0.830236	8.13761	0.558896	||	0	0.528552	0.891852	8.13761	0.315534
Dtnb	12:3617606-3648389	30783	17	2	8	|	16	6	4	||	41	51	39	|	30	21	68	||	0	0.282386	0.830236	8.64117	0.558953	||	0	-0.075616	0.972609	8.64117	0.813707
Fn3krp	11:121424926-121426703	1777	9	1	2	|	5	1	1	||	176	243	206	|	203	129	351	||	0	-0.427553	0.834098	9.92572	0.56201	||	0	0.204505	0.944221	9.92572	0.475743
Psd3	8:67882981-67908889	25908	1	2	1	|	2	0	0	||	36	58	41	|	44	18	27	||	0	-0.729077	0.836329	7.69834	0.563972	||	0	-0.428067	0.877405	7.69834	0.268571
Tasp1	2:139977607-140057499	79892	7	2	0	|	1	7	1	||	50	50	48	|	61	63	58	||	0	0.421247	0.840697	8.3815	0.567378	||	0	0.454492	0.745427	8.3815	0.145489
Elf2	3:51308050-51326035	17985	65	11	9	|	27	13	10	||	111	68	74	|	82	80	142	||	0	-0.261773	0.841093	10.326	0.568107	||	0	0.321655	0.944221	10.326	0.411594
Vps13b	15:35668701-35709813	41112	0	0	4	|	1	0	1	||	69	198	121	|	59	82	106	||	0	-0.715101	0.844491	8.93717	0.570865	||	0	-0.484997	0.764529	8.93717	0.164237
Cdc14a	3:116348454-116404618	56164	1	1	2	|	2	0	0	||	33	58	34	|	28	21	33	||	0	-0.699404	0.84605	7.59296	0.572758	||	0	-0.467525	0.737405	7.59296	0.140285
St3gal6	16:58484763-58493861	9098	1	2	0	|	4	0	0	||	171	106	170	|	109	45	140	||	0	0.64987	0.84605	9.15506	0.573306	||	0	-0.547613	0.757679	9.15506	0.153303
Mboat2	12:24878191-24924294	46103	8	0	0	|	4	0	0	||	100	42	85	|	76	16	64	||	0	-0.592769	0.84605	8.43315	0.573311	||	0	-0.478339	0.944221	8.43315	0.419327
Crebrf	17:26739543-26743131	3588	23	9	8	|	14	18	4	||	77	112	106	|	76	93	81	||	0	0.252291	0.846703	9.69805	0.574217	||	0	-0.0564745	0.982691	9.69805	0.858542
Etv6	6:134066307-134066465	158	1	3	0	|	1	0	1	||	97	54	61	|	57	33	46	||	0	-0.708886	0.849583	8.25305	0.576636	||	0	-0.532004	0.766593	8.25305	0.168953
Camk2d	3:126796838-126798280	1442	2	2	0	|	2	0	0	||	33	57	42	|	40	27	18	||	0	-0.709494	0.850294	7.67082	0.577585	||	0	-0.414387	0.891852	7.67082	0.319003
Mrc1	2:14288987-14294944	5957	0	1	4	|	3	1	2	||	117	118	172	|	150	239	160	||	0	0.520068	0.850981	9.56096	0.580335	||	0	0.628397	0.608845	9.56096	0.080445
Zranb1	7:132949585-132960734	11149	2	1	1	|	2	0	0	||	57	50	46	|	55	44	52	||	0	-0.683886	0.850981	8.08336	0.580815	||	0	0.114553	0.961696	8.08336	0.690199
Fam126a	5:23980487-23991837	11350	2	1	1	|	2	0	0	||	160	195	210	|	152	163	258	||	0	-0.681513	0.850981	9.66804	0.580876	||	0	0.134566	0.944221	9.66804	0.562516
Fut8	12:77364969-77365359	390	2	1	1	|	2	0	0	||	102	164	122	|	105	102	124	||	0	-0.681191	0.850981	9.11444	0.580884	||	0	-0.0740148	0.961696	9.11444	0.756701
Stat6	10:127646891-127648189	1298	2	1	1	|	2	0	0	||	103	138	103	|	87	78	118	||	0	-0.679191	0.850981	8.94224	0.580943	||	0	-0.155615	0.944221	8.94224	0.492685
Ubr7	12:102761371-102761981	610	2	0	2	|	2	0	0	||	77	82	75	|	115	90	118	||	0	-0.679049	0.850981	8.82282	0.581968	||	0	0.601592	0.27884	8.82282	0.0140643
Ash1l	3:89033259-89035481	2222	2	0	2	|	2	0	0	||	44	91	84	|	30	55	81	||	0	-0.686851	0.850981	8.32256	0.582569	||	0	-0.270563	0.937719	8.32256	0.396144
Ep300	15:81631614-81632512	898	2	4	1	|	2	1	1	||	60	125	111	|	54	79	145	||	0	-0.516583	0.850981	8.87344	0.582602	||	0	0.0182286	0.989186	8.87344	0.953343
Csnk1g1	9:65958329-65958721	392	1	0	3	|	1	0	1	||	31	55	36	|	31	35	57	||	0	-0.679448	0.850981	7.79283	0.582674	||	0	0.132484	0.955694	7.79283	0.648889
Espl1	15:102299803-102304145	4342	14	9	4	|	16	6	5	||	51	88	91	|	45	55	153	||	0	0.281421	0.850981	9.24739	0.582717	||	0	0.195153	0.944221	9.24739	0.56841
2610307P16Rik	13:28668370-28669994	1624	2	0	2	|	2	0	0	||	14	24	24	|	6	2	1	||	0	-0.697324	0.851141	6.41463	0.583555	||	0	-2.52085	0.000779085	6.41463	7.68834e-06
Fech	18:64470682-64483457	12775	2	0	2	|	2	0	0	||	1576	1102	1133	|	1603	1350	2046	||	0	-0.699255	0.851141	12.2023	0.583759	||	0	0.479721	0.804567	12.2023	0.201583
Rnf114	2:167510876-167512624	1748	6	1	2	|	2	2	1	||	163	94	111	|	120	87	104	||	0	-0.472722	0.851499	9.16582	0.584472	||	0	-0.126721	0.961696	9.16582	0.714123
Ube2e3	2:78913674-78920209	6535	2	2	0	|	1	0	1	||	113	147	130	|	171	135	193	||	0	-0.671048	0.853286	9.38707	0.586557	||	0	0.494542	0.4286	9.38707	0.0347767
Elf2	3:51323222-51326035	2813	6	0	0	|	2	0	1	||	213	105	107	|	143	88	159	||	0	-0.586691	0.853286	9.31901	0.587843	||	0	-0.0645397	0.982691	9.31901	0.876046
Tbc1d5	17:50917527-50935558	18031	3	1	0	|	2	0	0	||	26	51	51	|	29	30	37	||	0	-0.670369	0.853286	7.68492	0.588006	||	0	-0.258488	0.934366	7.68492	0.388835
Kansl1l	1:66772906-66778108	5202	3	0	1	|	2	0	0	||	84	136	114	|	47	35	42	||	0	-0.668144	0.853286	8.54091	0.588203	||	0	-1.2641	0.000179641	8.54091	1.25135e-06
Diaph3	14:86852072-86910123	58051	2	2	0	|	1	0	1	||	117	194	168	|	121	125	269	||	0	-0.672075	0.853286	9.48425	0.588751	||	0	0.195287	0.944221	9.48425	0.471074
Uimc1	13:55055975-55069807	13832	3	1	0	|	2	0	0	||	97	118	73	|	76	92	117	||	0	-0.670624	0.853286	8.84158	0.588774	||	0	0.107696	0.961696	8.84158	0.69183
Sfxn5	6:85256343-85269963	13620	3	0	1	|	2	0	0	||	26	34	44	|	15	19	22	||	0	-0.668118	0.853286	7.29118	0.589093	||	0	-0.746494	0.357594	7.29118	0.0219575
Lpcat1	13:73484261-73505584	21323	3	1	0	|	2	0	0	||	172	180	199	|	176	173	379	||	0	-0.670855	0.853286	9.79897	0.589441	||	0	0.468935	0.608845	9.79897	0.0804317
Mcph1	8:18641565-18671254	29689	3	1	0	|	2	0	0	||	70	123	107	|	79	89	199	||	0	-0.671035	0.853339	8.99039	0.589945	||	0	0.375998	0.787074	8.99039	0.189491
Rere	4:150431523-150439468	7945	1	1	2	|	0	0	2	||	42	68	45	|	36	22	32	||	0	-0.667682	0.85346	7.79895	0.591119	||	0	-0.630795	0.487906	7.79895	0.0461209
Stk3	15:35099434-35115645	16211	2	0	2	|	1	0	1	||	35	49	40	|	47	27	38	||	0	-0.666598	0.85346	7.76617	0.591377	||	0	0.004973	0.996472	7.76617	0.987373
Col11a1	3:114055595-114066574	10979	3	0	0	|	4	0	0	||	83	55	53	|	209	25	42	||	0	0.707365	0.85346	8.66456	0.59208	||	0	0.712981	0.901905	8.66456	0.331289
Arid1b	17:5097574-5127024	29450	4	0	0	|	2	0	0	||	65	71	61	|	20	20	29	||	0	-0.659141	0.85346	7.88629	0.592105	||	0	-1.38725	6.5288e-05	7.88629	3.93732e-07
Matr3	18:35587631-35588453	822	3	1	0	|	2	0	0	||	400	489	420	|	405	576	494	||	0	-0.67197	0.85346	10.7869	0.592368	||	0	0.345079	0.872095	10.7869	0.261259
Agap1	1:89627761-89634294	6533	4	0	0	|	2	0	0	||	66	75	72	|	50	37	91	||	0	-0.657458	0.854254	8.34649	0.594054	||	0	-0.17268	0.944221	8.34649	0.499605
Ankfy1	11:72712157-72714483	2326	4	0	0	|	2	0	0	||	75	121	118	|	87	58	110	||	0	-0.657158	0.854254	8.80848	0.594404	||	0	-0.168932	0.944221	8.80848	0.490737
Dcbld2	16:58424561-58433463	8902	2	2	1	|	5	0	1	||	11	9	3	|	14	14	16	||	0	0.506241	0.854254	6.53751	0.594584	||	0	1.03307	0.466873	6.53751	0.0432574
Kiz	2:146935803-146942979	7176	3	1	0	|	1	0	1	||	34	36	24	|	31	29	46	||	0	-0.656782	0.854254	7.56647	0.595399	||	0	0.281235	0.914576	7.56647	0.353496
Zfc3h1	10:115386962-115390436	3474	11	1	4	|	7	3	0	||	27	45	27	|	19	24	25	||	0	-0.338135	0.854254	7.75581	0.595443	||	0	-0.389361	0.864034	7.75581	0.252394
Mdm4	1:133009137-133012714	3577	4	0	0	|	2	0	0	||	92	158	124	|	81	103	123	||	0	-0.656022	0.854254	9.03779	0.59573	||	0	-0.132967	0.947086	9.03779	0.595044
Xdh	17:73906010-73907745	1735	6	0	4	|	3	4	3	||	76	122	101	|	69	79	141	||	0	0.362654	0.854337	9.02572	0.596256	||	0	0.0598919	0.972297	9.02572	0.809251
Hp1bp3	4:138234243-138237307	3064	4	0	0	|	2	0	0	||	258	328	318	|	222	286	402	||	0	-0.653844	0.856575	10.2335	0.598288	||	0	0.130188	0.949762	10.2335	0.608356
Ckap5	2:91546322-91550758	4436	3	2	2	|	2	0	2	||	149	222	213	|	106	148	270	||	0	-0.489047	0.85811	9.66575	0.600029	||	0	-0.0623994	0.975877	9.66575	0.822935
Hirip3	7:126864320-126864661	341	4	0	0	|	1	1	0	||	42	70	47	|	49	39	78	||	0	-0.646296	0.85811	8.12797	0.600301	||	0	0.175196	0.944221	8.12797	0.504242
Rhag	17:40828363-40831742	3379	5	1	1	|	4	0	0	||	624	500	609	|	666	417	855	||	0	-0.494307	0.860972	11.1219	0.602775	||	0	0.245296	0.944221	11.1219	0.441345
Atxn2	5:121802081-121803080	999	4	0	0	|	2	0	0	||	12	22	18	|	5	9	12	||	0	-0.647976	0.863897	6.50628	0.605297	||	0	-0.85252	0.527611	6.50628	0.0549706
Bcap29	12:31617075-31626876	9801	1	1	2	|	0	2	0	||	82	78	40	|	131	120	64	||	0	-0.665161	0.868367	8.78064	0.60929	||	0	0.852899	0.563354	8.78064	0.0657864
Lrp6	6:134506196-134513419	7223	4	0	0	|	1	1	0	||	41	43	66	|	33	45	43	||	0	-0.634955	0.868367	7.92909	0.609965	||	0	-0.154286	0.955356	7.92909	0.621706
Gbe1	16:70433545-70441319	7774	4	2	1	|	1	1	2	||	31	30	36	|	28	23	31	||	0	-0.465697	0.868367	7.53809	0.610238	||	0	-0.111833	0.961696	7.53809	0.700759
Rbl1	2:157187935-157199549	11614	7	0	3	|	4	0	2	||	89	157	148	|	125	104	195	||	0	-0.395075	0.868367	9.35842	0.610332	||	0	0.229722	0.917494	9.35842	0.36075
Plcl2	17:50541177-50546483	5306	11	2	4	|	7	6	3	||	51	52	70	|	23	69	72	||	0	0.308976	0.870683	8.61328	0.612753	||	0	0.0490778	0.985324	8.61328	0.893381
Mboat2	12:24854879-24882794	27915	3	0	1	|	2	0	0	||	65	28	69	|	53	12	34	||	0	-0.670733	0.870683	7.88975	0.612915	||	0	-0.601849	0.872095	7.88975	0.260712
Chd9	8:90932249-90933862	1613	2	1	1	|	0	1	1	||	21	24	26	|	18	13	8	||	0	-0.639472	0.871714	6.89608	0.614119	||	0	-0.669589	0.730558	6.89608	0.130972
Tdrd7	4:46025657-46029807	4150	4	0	0	|	2	0	0	||	12	30	32	|	19	22	17	||	0	-0.639361	0.872743	7.08282	0.615929	||	0	-0.145907	0.961696	7.08282	0.740123
Kif23	9:61935380-61937535	2155	4	0	0	|	1	1	0	||	126	203	193	|	83	92	225	||	0	-0.627875	0.872743	9.3757	0.616007	||	0	-0.311377	0.884914	9.3757	0.305006
not_annotated	13:8289299-8289477	178	21	87	28	|	50	16	43	||	350	464	250	|	301	147	303	||	0	-0.320689	0.872743	11.8797	0.616279	||	0	-0.386373	0.944221	11.8797	0.529219
Slc33a1	3:63943222-63954004	10782	3	0	1	|	1	0	1	||	30	41	25	|	33	37	21	||	0	-0.635744	0.872941	7.51284	0.617374	||	0	0.123957	0.961696	7.51284	0.76503
Itsn2	12:4658015-4666326	8311	6	0	1	|	4	0	0	||	79	180	124	|	63	102	114	||	0	-0.470022	0.872941	9.04936	0.618686	||	0	-0.289909	0.92041	9.04936	0.364833
Ebf1	11:44869092-44924575	55483	3	1	5	|	6	0	0	||	115	229	183	|	53	23	12	||	0	-0.461592	0.872941	8.99811	0.618724	||	0	-2.30679	0.00310442	8.99811	4.2501e-05
Srbd1	17:86098512-86103000	4488	8	2	3	|	11	1	1	||	61	71	82	|	78	74	117	||	0	0.299013	0.872941	8.89039	0.618978	||	0	0.448879	0.527611	8.89039	0.0555056
Setd3	12:108157754-108165172	7418	14	6	5	|	12	2	3	||	150	101	116	|	143	89	178	||	0	-0.271119	0.872941	9.60697	0.619677	||	0	0.236779	0.944221	9.60697	0.447467
Zfp827	8:79118175-79136663	18488	14	0	3	|	8	0	2	||	17	21	10	|	11	6	7	||	0	-0.375219	0.872941	7.02634	0.619755	||	0	-0.832374	0.757679	7.02634	0.156536
Nbas	12:13469841-13484044	14203	5	1	1	|	1	3	0	||	25	38	27	|	21	24	32	||	0	-0.454035	0.872941	7.44978	0.619769	||	0	-0.0934874	0.961696	7.44978	0.755305
Trim24	6:37903533-37931500	27967	6	1	1	|	2	3	3	||	35	49	38	|	28	42	68	||	0	0.375266	0.874342	8.03677	0.621243	||	0	0.281374	0.901905	8.03677	0.329534
Ppa2	3:133320936-133330512	9576	2	0	2	|	5	0	0	||	94	47	44	|	86	32	46	||	0	0.534593	0.874673	8.31581	0.621958	||	0	-0.0603768	0.985671	8.31581	0.905153
Dennd4a	9:64835954-64839144	3190	13	0	2	|	6	2	1	||	337	552	522	|	306	393	711	||	0	-0.335333	0.879122	10.8449	0.625603	||	0	0.101215	0.961696	10.8449	0.751193
Kif2a	13:106982524-106988075	5551	4	0	3	|	1	1	2	||	66	115	114	|	50	89	160	||	0	-0.441591	0.899492	8.91369	0.640592	||	0	0.1155	0.961696	8.91369	0.722071
Knl1	2:119076936-119086650	9714	4	4	2	|	3	3	4	||	137	318	263	|	117	191	336	||	0	0.341295	0.899895	9.98572	0.641372	||	0	-0.0435693	0.985324	9.98572	0.898374
Stag2	X:42217416-42250037	32621	6	3	2	|	5	0	2	||	207	290	347	|	241	331	485	||	0	-0.345353	0.902075	10.3755	0.643421	||	0	0.4481	0.684452	10.3755	0.102595
Pip5k1b	19:24346237-24360151	13914	17	2	7	|	10	6	7	||	71	48	60	|	56	41	100	||	0	0.227972	0.911042	8.9665	0.650316	||	0	0.194115	0.944221	8.9665	0.533167
Ceacam16	7:19853572-19853898	326	6	1	0	|	4	0	3	||	4	2	0	|	4	3	3	||	0	0.405227	0.919137	5.68657	0.656598	||	0	0.78338	0.896398	5.68657	0.325338
2700097O09Rik	12:55057242-55063109	5867	2	2	1	|	3	0	0	||	37	22	26	|	38	15	20	||	0	-0.500367	0.921246	7.35728	0.65861	||	0	-0.0822231	0.982691	7.35728	0.865506
Uhrf2	19:30039064-30039297	233	5	2	5	|	7	1	0	||	94	119	137	|	117	83	122	||	0	-0.306	0.922525	9.19461	0.66003	||	0	0.0248868	0.987924	9.19461	0.921116
Fbxo42	4:141167713-141180532	12819	6	2	0	|	5	2	1	||	92	97	98	|	73	58	163	||	0	0.337945	0.923761	8.95001	0.661421	||	0	0.0875982	0.961696	8.95001	0.76116
Ccne2	4:11193926-11201416	7490	5	2	0	|	3	2	2	||	480	392	357	|	317	197	443	||	0	0.363241	0.924927	10.5193	0.663159	||	0	-0.295267	0.903988	10.5193	0.341888
Xrn2	2:147024715-147026439	1724	8	0	8	|	16	1	0	||	146	162	202	|	188	180	178	||	0	0.270115	0.924927	9.84995	0.66327	||	0	0.271415	0.944221	9.84995	0.453305
Nrip1	16:76330746-76352549	21803	6	1	0	|	4	1	2	||	32	35	40	|	48	43	49	||	0	0.344514	0.928214	7.96895	0.666149	||	0	0.530628	0.509794	7.96895	0.0511471
Dleu2	14:61632437-61644059	11622	5	2	0	|	3	4	0	||	131	125	116	|	105	111	146	||	0	0.347364	0.928214	9.23978	0.666645	||	0	0.0784996	0.961696	9.23978	0.754454
Cse1l	2:166939635-166941492	1857	8	2	0	|	9	0	1	||	185	173	209	|	178	120	169	||	0	0.305018	0.928609	9.69239	0.667468	||	0	-0.142912	0.955694	9.69239	0.630666
Plcl2	17:50606295-50611195	4900	21	13	11	|	8	14	8	||	153	126	174	|	134	101	217	||	0	-0.192644	0.928609	10.117	0.668224	||	0	0.0733265	0.971829	10.117	0.807194
Itm2b	14:73364574-73364684	110	0	2	0	|	1	0	0	||	2477	1640	1665	|	2678	1499	1728	||	0	-0.759617	0.928609	12.578	0.668456	||	0	0.167819	0.961696	12.578	0.723334
Eri3	4:117582600-117593162	10562	6	1	2	|	7	1	1	||	55	41	59	|	73	51	64	||	0	0.310844	0.930459	8.41451	0.670689	||	0	0.414594	0.764529	8.41451	0.167396
Ppp4r1	17:65803211-65816050	12839	4	1	3	|	3	0	2	||	55	81	86	|	44	45	72	||	0	-0.353896	0.930459	8.43034	0.670996	||	0	-0.336259	0.735086	8.43034	0.138127
Top2a	11:99009230-99011063	1833	4	0	2	|	2	1	3	||	1026	1862	1598	|	954	905	2125	||	0	0.386947	0.930459	12.1103	0.671318	||	0	-0.0853796	0.972297	12.1103	0.811326
Trmt2b	X:134261577-134267561	5984	7	1	3	|	4	0	3	||	55	48	52	|	58	32	56	||	0	-0.310699	0.931807	8.25283	0.672898	||	0	0.0324366	0.987888	8.25283	0.911033
Ash1l	3:88965812-88966328	516	4	1	2	|	3	2	2	||	66	95	120	|	70	64	103	||	0	0.33577	0.931807	8.80516	0.674423	||	0	-0.113605	0.955694	8.80516	0.636262
Nfix	8:84771784-84772315	531	52	12	9	|	37	5	8	||	53	28	25	|	46	15	40	||	0	-0.234556	0.931807	9.72877	0.675628	||	0	-0.00509284	0.998257	9.72877	0.992335
Stxbp5	10:9798122-9800068	1946	4	3	1	|	6	0	2	||	35	53	41	|	36	35	51	||	0	0.307886	0.931807	8.0024	0.678766	||	0	0.0494217	0.982691	8.0024	0.844568
Mdm2	10:117692582-117695068	2486	0	2	3	|	2	0	1	||	87	114	117	|	66	72	110	||	0	-0.435692	0.931807	8.83914	0.679673	||	0	-0.23623	0.878017	8.83914	0.285971
Slc22a23	13:34298997-34305261	6264	0	0	2	|	1	0	0	||	45	91	106	|	36	82	182	||	0	-0.725413	0.931807	8.6858	0.680047	||	0	0.377178	0.934366	8.6858	0.390293
Arpc3	5:122404151-122405145	994	3	1	0	|	0	1	1	||	1996	1058	991	|	1554	524	886	||	0	-0.550921	0.931807	11.936	0.680484	||	0	-0.343005	0.944221	11.936	0.517637
Pde4d	13:109693025-109698156	5131	3	1	0	|	0	0	2	||	10	16	18	|	4	25	27	||	0	-0.549417	0.931807	6.77555	0.68127	||	0	0.470307	0.944221	6.77555	0.429783
Hectd1	12:51759219-51761170	1951	36	6	9	|	19	8	7	||	134	207	195	|	134	201	272	||	0	-0.175701	0.931807	10.3641	0.682776	||	0	0.309799	0.878017	10.3641	0.287786
Strn3	12:51647994-51661713	13719	11	0	5	|	11	1	3	||	88	117	92	|	78	85	111	||	0	0.231358	0.931807	9.13851	0.683105	||	0	0.0170713	0.988023	9.13851	0.945231
P2rx4	5:122718313-122719226	913	0	0	2	|	1	0	0	||	47	40	41	|	58	38	29	||	0	-0.71102	0.931807	7.82924	0.683685	||	0	0.146164	0.961696	7.82924	0.719385
Susd1	4:59420843-59428064	7221	0	2	0	|	1	0	0	||	53	70	75	|	42	14	34	||	0	-0.704571	0.931807	7.93434	0.684063	||	0	-0.994791	0.148179	7.93434	0.00482454
Xpo7	14:70678079-70682850	4771	17	6	11	|	24	8	2	||	651	1163	1116	|	598	622	1573	||	0	0.210822	0.931807	11.8281	0.686348	||	0	0.00241816	0.998257	11.8281	0.994901
Prkcb	7:122516829-122528572	11743	2	3	0	|	2	0	1	||	115	207	194	|	73	32	95	||	0	-0.436387	0.931807	9.09213	0.68673	||	0	-1.24982	0.0055663	9.09213	8.23958e-05
Smg5	3:88346445-88349444	2999	6	1	1	|	3	2	0	||	99	108	103	|	91	83	143	||	0	-0.337675	0.931807	9.02405	0.687102	||	0	0.137528	0.944221	9.02405	0.538902
Jade1	3:41581195-41596826	15631	0	2	0	|	1	0	0	||	29	24	30	|	25	34	48	||	0	-0.68888	0.931807	7.45121	0.688751	||	0	0.470545	0.733543	7.45121	0.135396
Plxnd1	6:115969876-115970248	372	0	2	0	|	1	0	0	||	30	36	33	|	38	25	34	||	0	-0.68694	0.931807	7.49295	0.689337	||	0	0.111823	0.961696	7.49295	0.71432
Glud1	14:34321768-34336576	14808	0	0	2	|	1	0	0	||	113	163	150	|	147	115	160	||	0	-0.680772	0.931807	9.29042	0.691729	||	0	0.13558	0.944221	9.29042	0.569624
Eif2b1	5:124576798-124577152	354	3	0	2	|	3	0	0	||	179	95	115	|	208	109	114	||	0	-0.446476	0.931807	9.3456	0.692796	||	0	0.286914	0.944221	9.3456	0.5114
Gramd4	15:86091313-86100900	9587	3	0	2	|	3	0	0	||	42	23	35	|	31	9	19	||	0	-0.45065	0.931807	7.34958	0.692921	||	0	-0.640869	0.809639	7.34958	0.205961
Tfrc	16:32614566-32615394	828	5	1	1	|	2	2	0	||	4350	1958	3238	|	2561	1081	3633	||	0	-0.410409	0.931807	13.0135	0.69446	||	0	-0.378627	0.944221	13.0135	0.467928
Fam126a	5:23980487-23983266	2779	4	0	2	|	3	1	2	||	120	162	180	|	134	135	229	||	0	0.338238	0.931807	9.51658	0.694595	||	0	0.223704	0.903988	9.51658	0.34007
Pde8a	7:81300640-81306783	6143	1	1	0	|	1	0	0	||	6	8	15	|	16	9	21	||	0	-0.68053	0.931807	6.39508	0.695216	||	0	0.770194	0.664027	6.39508	0.0972012
Cdc42bpb	12:111336026-111345623	9597	1	1	0	|	1	0	0	||	15	20	25	|	20	25	17	||	0	-0.679712	0.931807	6.94666	0.695276	||	0	0.229688	0.944221	6.94666	0.575494
Smg1	7:118193450-118196035	2585	6	2	0	|	7	1	0	||	74	129	126	|	57	97	100	||	0	0.304073	0.931807	8.96848	0.695585	||	0	-0.208473	0.944221	8.96848	0.490571
Nsd3	8:25640577-25641325	748	0	0	2	|	0	1	0	||	71	126	98	|	52	60	102	||	0	-0.668128	0.931807	8.63129	0.697059	||	0	-0.34264	0.764529	8.63129	0.167438
Rere	4:150468695-150510038	41343	0	0	2	|	0	0	1	||	25	46	31	|	34	26	34	||	0	-0.669091	0.931807	7.48456	0.697367	||	0	0.0350756	0.987888	7.48456	0.911699
Sash1	10:8780519-8789601	9082	1	0	1	|	1	0	0	||	11	12	15	|	26	11	15	||	0	-0.679443	0.931807	6.61007	0.6974	||	0	0.606273	0.809635	6.61007	0.204628
Glt1d1	5:127644319-127664708	20389	1	0	1	|	1	0	0	||	0	1	2	|	4	4	3	||	0	-0.679445	0.931807	5.11981	0.6974	||	0	1.7938	0.395431	5.11981	0.0300361
Ubn2	6:38461475-38470222	8747	3	1	1	|	2	0	1	||	41	61	66	|	44	44	73	||	0	-0.408891	0.931807	8.17721	0.697914	||	0	0.0619613	0.96861	8.17721	0.792914
Pola1	X:93461369-93493581	32212	3	2	1	|	2	2	2	||	119	237	203	|	160	141	287	||	0	0.338627	0.931807	9.71883	0.698404	||	0	0.188629	0.944221	9.71883	0.485119
Specc1	11:62029253-62043075	13822	2	2	2	|	1	3	2	||	238	348	282	|	216	211	552	||	0	0.343623	0.931807	10.2809	0.698578	||	0	0.229757	0.944221	10.2809	0.448211
Rps6ka5	12:100595815-100619641	23826	3	1	1	|	2	0	1	||	34	61	43	|	36	36	52	||	0	-0.408988	0.931807	7.90939	0.698984	||	0	-0.0183775	0.988023	7.90939	0.944473
Sdccag8	1:176868212-176874698	6486	2	0	0	|	1	0	0	||	41	54	53	|	34	30	54	||	0	-0.659413	0.931807	7.83776	0.699978	||	0	-0.208293	0.938223	7.83776	0.398642
Mtmr12	15:12236018-12238019	2001	2	0	0	|	1	0	0	||	60	70	57	|	60	61	89	||	0	-0.659388	0.931807	8.34766	0.7	||	0	0.286341	0.808824	8.34766	0.203447
Cit	5:115884866-115886807	1941	5	0	1	|	4	0	2	||	50	82	129	|	42	73	273	||	0	0.378597	0.931807	8.98714	0.700072	||	0	0.573822	0.875363	8.98714	0.265985
Fto	8:91468317-91474452	6135	2	0	0	|	1	0	0	||	46	73	58	|	45	38	74	||	0	-0.658857	0.931807	8.11306	0.700458	||	0	-0.0573389	0.972362	8.11306	0.812967
Ankrd13c	3:157972232-157975294	3062	2	0	0	|	1	0	0	||	40	68	70	|	44	38	67	||	0	-0.658583	0.931807	8.08644	0.700695	||	0	-0.127664	0.949762	8.08644	0.606495
Alg6	4:99748686-99753191	4505	4	1	0	|	3	0	0	||	36	28	40	|	37	41	45	||	0	-0.410615	0.931807	7.76447	0.700759	||	0	0.373624	0.837997	7.76447	0.22512
Zfc3h1	10:115389173-115390436	1263	3	1	1	|	2	1	0	||	37	65	50	|	24	40	42	||	0	-0.409568	0.931807	7.89111	0.701134	||	0	-0.367829	0.831291	7.89111	0.217215
Vprbp	9:106844136-106854294	10158	2	0	0	|	1	0	0	||	38	56	49	|	37	41	79	||	0	-0.658047	0.931807	7.98064	0.701158	||	0	0.237318	0.917494	7.98064	0.361693
Lbr	1:181825622-181832232	6610	39	9	16	|	31	5	10	||	1029	1161	1079	|	930	584	1550	||	0	-0.176127	0.931807	12.0879	0.701511	||	0	-0.0277381	0.988023	12.0879	0.93832
Phf3	1:30852896-30863255	10359	4	1	0	|	3	0	0	||	25	38	34	|	22	40	47	||	0	-0.410924	0.931807	7.63113	0.701527	||	0	0.300495	0.915904	7.63113	0.354511
Dbnl	11:5791792-5794311	2519	2	0	0	|	1	0	0	||	112	151	142	|	103	62	126	||	0	-0.657241	0.931807	9.02475	0.701856	||	0	-0.356738	0.739223	9.02475	0.141441
Ptp4a2	4:129838978-129845192	6214	4	1	0	|	3	0	0	||	287	475	423	|	317	395	444	||	0	-0.411149	0.931807	10.5622	0.702055	||	0	0.129432	0.955694	10.5622	0.634551
Mlec	5:115150069-115150994	925	2	0	0	|	1	0	0	||	123	128	121	|	108	65	115	||	0	-0.656361	0.931807	8.97421	0.702622	||	0	-0.250251	0.901905	8.97421	0.331395
Epn1	7:5089919-5090168	249	2	0	0	|	1	0	0	||	93	106	143	|	135	125	247	||	0	-0.656232	0.931807	9.27506	0.702734	||	0	0.663167	0.224456	9.27506	0.00931878
Arih1	9:59394878-59405855	10977	2	0	0	|	1	0	0	||	109	212	189	|	137	131	201	||	0	-0.655982	0.931807	9.44633	0.702952	||	0	0.0245798	0.987924	9.44633	0.923284
Ppp1r12a	10:108268572-108274188	5616	2	0	0	|	1	0	0	||	174	297	234	|	146	166	266	||	0	-0.655874	0.931807	9.77452	0.703046	||	0	-0.162763	0.944221	9.77452	0.520239
Dctn2	10:127275824-127278408	2584	2	0	0	|	1	0	0	||	210	171	210	|	221	176	293	||	0	-0.655219	0.931807	9.80123	0.703618	||	0	0.323158	0.831291	9.80123	0.220128
Dennd1b	1:139085883-139110485	24602	2	0	0	|	1	0	0	||	34	71	48	|	37	34	37	||	0	-0.654898	0.931807	7.82217	0.703899	||	0	-0.329583	0.879216	7.82217	0.291507
Oxr1	15:41797474-41826052	28578	2	0	0	|	0	0	1	||	45	52	55	|	51	35	61	||	0	-0.650497	0.931807	7.99374	0.70397	||	0	0.0747748	0.961696	7.99374	0.75902
Bcl2l13	6:120862855-120870835	7980	2	0	0	|	1	0	0	||	96	69	117	|	83	69	134	||	0	-0.654717	0.931807	8.78371	0.704057	||	0	0.105291	0.961696	8.78371	0.712215
Vwa8	14:78982236-78984302	2066	2	0	0	|	1	0	0	||	31	28	34	|	38	40	35	||	0	-0.654469	0.931807	7.56805	0.704275	||	0	0.435513	0.783848	7.56805	0.186802
Smox	2:131511984-131516443	4459	43	4	6	|	19	6	8	||	211	174	209	|	179	126	313	||	0	-0.18668	0.931807	10.403	0.704303	||	0	0.111395	0.961696	10.403	0.765497
Ptma	1:86529206-86529494	288	4	0	0	|	2	1	1	||	7914	5110	5765	|	7858	4290	5733	||	0	0.439119	0.931807	14.0798	0.704387	||	0	0.0530494	0.987924	14.0798	0.919957
Asph	4:9594663-9610938	16275	2	0	0	|	0	1	0	||	78	96	104	|	106	107	142	||	0	-0.649622	0.931807	8.93237	0.704499	||	0	0.488235	0.380534	8.93237	0.0256936
Txndc11	16:11122670-11128703	6033	2	0	0	|	1	0	0	||	102	104	81	|	70	38	54	||	0	-0.653522	0.931807	8.50263	0.705105	||	0	-0.685033	0.387	8.50263	0.0278395
Scaf11	15:96431781-96446591	14810	2	0	0	|	0	0	1	||	95	138	136	|	132	132	183	||	0	-0.647304	0.931807	9.24075	0.705795	||	0	0.415865	0.553741	9.24075	0.0634495
Eya3	4:132656693-132670255	13562	2	0	0	|	0	1	0	||	95	112	99	|	72	45	77	||	0	-0.647034	0.931807	8.6247	0.705983	||	0	-0.530295	0.387754	8.6247	0.0285046
Trmt44	5:35568761-35571112	2351	2	0	0	|	1	0	0	||	28	25	25	|	23	28	22	||	0	-0.652518	0.931807	7.1951	0.70599	||	0	0.0579932	0.982691	7.1951	0.876466
Rbm33	5:28394002-28394670	668	3	1	1	|	2	0	1	||	29	95	58	|	34	38	66	||	0	-0.409852	0.931807	8.12353	0.706376	||	0	-0.255915	0.944221	8.12353	0.463431
Pank2	2:131273911-131287597	13686	4	0	1	|	2	0	1	||	71	95	84	|	87	55	94	||	0	-0.397543	0.931807	8.6584	0.707304	||	0	0.0488526	0.980863	8.6584	0.838365
Ezh2	6:47540677-47577667	36990	15	7	9	|	9	6	12	||	151	237	205	|	100	84	190	||	0	0.173789	0.931807	9.98123	0.707345	||	0	-0.569484	0.432577	9.98123	0.0355738
Pum1	4:130727998-130730548	2550	6	2	0	|	3	0	2	||	75	150	155	|	87	132	195	||	0	-0.326177	0.931807	9.29071	0.707668	||	0	0.257513	0.941468	9.29071	0.403634
Tlk1	2:70754440-70786995	32555	2	0	0	|	0	1	0	||	142	178	161	|	114	142	219	||	0	-0.643758	0.931807	9.42545	0.707861	||	0	0.0907092	0.961696	9.42545	0.707235
Fcho2	13:98784776-98789873	5097	2	0	0	|	1	0	0	||	65	164	151	|	69	118	171	||	0	-0.650228	0.931807	9.08534	0.708019	||	0	0.0560051	0.982691	9.08534	0.869565
Dcun1d4	5:73510886-73534697	23811	1	1	0	|	0	0	1	||	9	11	10	|	7	3	2	||	0	-0.650259	0.931807	5.85501	0.708932	||	0	-1.11832	0.504966	5.85501	0.0502027
Usp32	11:85017630-85019876	2246	2	0	0	|	1	0	0	||	129	230	263	|	163	260	540	||	0	-0.648447	0.931807	10.0194	0.709608	||	0	0.711946	0.487906	10.0194	0.0462762
Nsd1	13:55233895-55248077	14182	1	1	4	|	1	1	4	||	136	179	236	|	143	182	178	||	0	0.328152	0.931807	9.6556	0.709777	||	0	0.0426742	0.983222	9.6556	0.88459
Insig2	1:121319597-121319972	375	2	0	0	|	1	0	0	||	14	16	16	|	22	17	12	||	0	-0.647872	0.931807	6.69666	0.710123	||	0	0.327875	0.944221	6.69666	0.47183
Dnmbp	19:43866589-43875020	8431	1	0	1	|	0	0	1	||	9	16	9	|	6	6	18	||	0	-0.646235	0.931807	6.22068	0.710201	||	0	-0.0934845	0.982691	6.22068	0.847996
Huwe1	X:151835224-151843155	7931	4	0	1	|	2	1	0	||	152	218	218	|	141	153	175	||	0	-0.395105	0.931807	9.60129	0.710535	||	0	-0.167023	0.944221	9.60129	0.492174
Faf1	4:109925298-109935698	10400	2	0	0	|	0	0	1	||	162	151	142	|	168	115	178	||	0	-0.638392	0.931807	9.39378	0.710877	||	0	0.137256	0.949762	9.39378	0.608189
Upf2	2:5973469-5988472	15003	4	0	1	|	2	0	1	||	48	99	90	|	46	60	80	||	0	-0.394347	0.931807	8.47359	0.711318	||	0	-0.201266	0.944221	8.47359	0.455597
Gspt1	16:11230510-11239099	8589	3	0	2	|	1	0	2	||	89	100	93	|	111	78	102	||	0	-0.393575	0.931807	8.87743	0.711586	||	0	0.190576	0.944221	8.87743	0.456369
Ubap2	4:41216566-41229848	13282	2	0	0	|	0	1	0	||	39	53	57	|	28	49	80	||	0	-0.637174	0.931807	8.00616	0.711626	||	0	0.175885	0.944221	8.00616	0.565416
Apbb2	5:66362718-66365120	2402	2	0	0	|	1	0	0	||	9	16	12	|	9	18	9	||	0	-0.645374	0.932118	6.38751	0.712376	||	0	0.155166	0.961696	6.38751	0.759523
Mtm1	X:71231391-71234946	3555	2	0	0	|	1	0	0	||	24	20	14	|	20	23	13	||	0	-0.643255	0.932534	6.88388	0.714304	||	0	0.12115	0.971579	6.88388	0.804258
Epg5	18:77995512-77997369	1857	4	1	0	|	2	0	1	||	27	51	48	|	23	31	61	||	0	-0.392777	0.932534	7.78959	0.715001	||	0	-0.0270126	0.988023	7.78959	0.933967
Map2k2	10:81108748-81118229	9481	2	0	0	|	0	0	1	||	110	101	114	|	112	49	116	||	0	-0.630966	0.932534	8.85989	0.7151	||	0	-0.128043	0.960131	8.85989	0.679024
Cabin1	10:75684292-75700095	15803	7	2	4	|	11	0	2	||	32	83	68	|	40	53	117	||	0	0.242441	0.932534	8.6284	0.71518	||	0	0.295516	0.944221	8.6284	0.416759
Syne2	12:76031276-76039085	7809	2	0	0	|	1	0	0	||	17	25	26	|	10	7	37	||	0	-0.642222	0.932534	6.8871	0.715249	||	0	-0.300937	0.944221	6.8871	0.543519
Rbm27	18:42320764-42326024	5260	2	3	1	|	4	2	0	||	58	83	74	|	46	49	64	||	0	0.308613	0.933056	8.39958	0.716161	||	0	-0.298336	0.779169	8.39958	0.182054
Exoc3l2	7:19481246-19484734	3488	2	0	0	|	0	0	1	||	6	7	6	|	3	3	5	||	0	-0.628143	0.933095	5.57653	0.716703	||	0	-0.637304	0.878017	5.57653	0.278883
Uxs1	1:43797245-43807377	10132	2	0	0	|	0	0	1	||	42	38	31	|	63	32	48	||	0	-0.625447	0.933737	7.81995	0.718231	||	0	0.496356	0.764529	7.81995	0.167147
Esco1	18:10574875-10586041	11166	5	0	1	|	6	0	0	||	56	82	83	|	61	74	68	||	0	0.312664	0.933737	8.55726	0.71831	||	0	0.0494141	0.982691	8.55726	0.856543
Wapl	14:34730549-34731609	1060	2	1	2	|	1	3	1	||	216	389	457	|	283	468	700	||	0	0.350409	0.933737	10.6528	0.718884	||	0	0.577446	0.620205	10.6528	0.0848603
Slc44a1	4:53481464-53491530	10066	2	0	0	|	0	0	1	||	19	32	51	|	37	22	39	||	0	-0.623659	0.933737	7.49722	0.719244	||	0	0.0930969	0.971579	7.49722	0.804728
Ern1	11:106421706-106423488	1782	2	0	0	|	0	1	0	||	26	32	31	|	20	54	53	||	0	-0.618566	0.934328	7.60963	0.72222	||	0	0.646527	0.681749	7.60963	0.101291
Xrcc4	13:89991073-89992606	1533	2	0	0	|	0	1	0	||	47	48	45	|	40	16	22	||	0	-0.617278	0.934328	7.61841	0.722951	||	0	-0.682281	0.633681	7.61841	0.088827
Phip	9:82926397-82945918	19521	2	0	0	|	0	1	0	||	81	224	196	|	84	150	160	||	0	-0.616355	0.934328	9.33307	0.723474	||	0	-0.161885	0.957698	9.33307	0.65641
Oma1	4:103319022-103353651	34629	2	0	0	|	0	0	1	||	41	32	30	|	40	22	25	||	0	-0.61559	0.934328	7.46928	0.723805	||	0	-0.0978098	0.972297	7.46928	0.809952
Mki67	7:135713757-135714039	282	3	2	0	|	2	1	2	||	1146	1472	1343	|	1103	750	2607	||	0	0.351289	0.934328	12.095	0.724262	||	0	0.202463	0.949762	12.095	0.600389
Adnp2	18:80137484-80142769	5285	5	0	0	|	3	0	0	||	31	43	29	|	32	15	23	||	0	-0.385338	0.934328	7.43187	0.724554	||	0	-0.402813	0.884914	7.43187	0.305645
Tlk1	2:70738421-70786995	48574	1	2	2	|	1	2	2	||	110	153	113	|	102	106	144	||	0	0.323473	0.934328	9.1815	0.729485	||	0	0.0375722	0.982691	9.1815	0.872115
Strn3	12:51655402-51661713	6311	7	3	2	|	3	2	3	||	107	107	91	|	78	86	114	||	0	-0.238685	0.934328	9.03954	0.729843	||	0	-0.0168669	0.988023	9.03954	0.944645
Insr	8:3258383-3258934	551	23	1	5	|	20	3	3	||	96	62	61	|	85	51	73	||	0	0.199626	0.934328	9.17695	0.73066	||	0	0.0412442	0.987924	9.17695	0.925112
Pphln1	15:93452117-93465245	13128	3	2	0	|	3	1	1	||	62	73	51	|	54	54	61	||	0	0.322266	0.934328	8.32442	0.730818	||	0	0.00145311	0.998257	8.32442	0.995629
Tcf20	15:82851513-82857284	5771	6	12	12	|	6	6	10	||	47	105	95	|	57	58	101	||	0	-0.183737	0.934328	9.22891	0.731428	||	0	-0.0586541	0.982691	9.22891	0.8723
Eed	7:89955531-89962361	6830	19	3	2	|	16	1	0	||	126	145	126	|	128	80	102	||	0	-0.209305	0.934328	9.47943	0.731555	||	0	-0.199618	0.955588	9.47943	0.622701
Cdc14b	13:64243634-64248499	4865	2	1	0	|	0	3	0	||	3	8	8	|	9	8	2	||	0	0.447056	0.934328	5.89127	0.732205	||	0	0.245065	0.961696	5.89127	0.727092
Arsb	13:93862087-93880558	18471	2	0	0	|	0	0	1	||	107	98	88	|	131	33	96	||	0	-0.598984	0.934328	8.76498	0.733144	||	0	-0.0610792	0.983222	8.76498	0.886752
Fbxo8	8:56564558-56569410	4852	9	3	0	|	6	1	1	||	79	42	61	|	63	47	65	||	0	-0.248307	0.934328	8.48705	0.735257	||	0	0.0464643	0.985324	8.48705	0.894652
Mbnl2	14:120324794-120325412	618	4	0	0	|	2	0	2	||	91	95	109	|	79	58	65	||	0	0.353829	0.934328	8.69598	0.735424	||	0	-0.388587	0.757679	8.69598	0.154268
Wrn	8:33266951-33269066	2115	3	1	0	|	1	2	1	||	123	215	197	|	118	142	248	||	0	0.354259	0.934328	9.56676	0.735796	||	0	0.0394762	0.983222	9.56676	0.881707
Zfp516	18:82955524-82957449	1925	7	0	1	|	2	1	2	||	34	30	42	|	27	15	40	||	0	-0.29058	0.934328	7.61154	0.735883	||	0	-0.277247	0.944221	7.61154	0.41439
Topbp1	9:103334056-103338372	4316	4	0	0	|	2	1	1	||	148	194	173	|	156	189	267	||	0	0.350095	0.934328	9.68055	0.737193	||	0	0.371248	0.70537	9.68055	0.122095
Zcchc8	5:123709382-123719528	10146	5	1	3	|	4	0	2	||	90	128	110	|	90	65	110	||	0	-0.262111	0.934328	8.9795	0.737502	||	0	-0.177593	0.944221	8.9795	0.436871
Adcy7	8:88306350-88306770	420	4	0	0	|	2	1	1	||	64	76	107	|	84	78	97	||	0	0.348482	0.934328	8.71567	0.737926	||	0	0.217731	0.934366	8.71567	0.386523
Trmu	15:85882674-85885192	2518	2	0	0	|	0	0	1	||	35	16	24	|	32	27	19	||	0	-0.58968	0.934328	7.2305	0.738347	||	0	0.206734	0.960131	7.2305	0.677476
Lrp6	6:134541652-134542045	393	6	1	2	|	5	0	1	||	37	33	43	|	25	38	36	||	0	-0.266203	0.934328	7.80729	0.739394	||	0	-0.0505975	0.982691	7.80729	0.874247
Bckdhb	9:83988776-84012619	23843	3	0	1	|	2	2	0	||	16	18	11	|	25	25	8	||	0	0.381378	0.934328	6.90686	0.739459	||	0	0.590702	0.884914	6.90686	0.30551
Igf1r	7:68003810-68004355	545	2	2	1	|	3	1	1	||	38	49	54	|	35	41	87	||	0	0.309825	0.934328	8.10765	0.74161	||	0	0.296239	0.878017	8.10765	0.28808
Rmdn2	17:79650302-79659473	9171	4	0	0	|	3	1	0	||	14	8	10	|	15	5	9	||	0	0.365474	0.934328	6.35695	0.742483	||	0	-0.0194134	0.991451	6.35695	0.972239
Ldha	7:46850178-46851058	880	2	0	0	|	0	0	1	||	827	461	514	|	1008	534	494	||	0	-0.581233	0.934328	11.1997	0.743051	||	0	0.327107	0.944221	11.1997	0.488985
Fryl	5:73069883-73072921	3038	4	0	0	|	3	1	0	||	83	152	166	|	68	116	255	||	0	0.354791	0.934328	9.28054	0.743589	||	0	0.20405	0.944221	9.28054	0.585125
Rbbp4	4:129317648-129322869	5221	4	1	1	|	6	0	0	||	590	693	727	|	666	469	849	||	0	0.287065	0.934328	11.2208	0.744739	||	0	0.097013	0.961696	11.2208	0.733821
Cep128	12:91255575-91267086	11511	1	2	1	|	0	1	3	||	46	147	129	|	59	133	204	||	0	0.360104	0.934328	9.11158	0.74535	||	0	0.432596	0.893536	9.11158	0.321359
Cep192	18:67818770-67820432	1662	4	0	0	|	3	1	0	||	69	125	127	|	64	96	158	||	0	0.342746	0.934328	8.96687	0.745439	||	0	0.102485	0.961696	8.96687	0.728114
Ckap5	2:91559049-91563113	4064	2	1	1	|	1	0	3	||	174	317	257	|	160	192	315	||	0	0.340874	0.934328	9.93909	0.745782	||	0	-0.0429699	0.982691	9.93909	0.872524
Larp4b	13:9122108-9137301	15193	4	0	0	|	3	1	0	||	220	225	206	|	217	146	274	||	0	0.34016	0.934328	9.84028	0.74592	||	0	0.0706528	0.967734	9.84028	0.788378
Cep350	1:155958561-155962560	3999	3	1	1	|	4	0	1	||	55	87	100	|	57	39	113	||	0	0.307506	0.934328	8.56246	0.746147	||	0	-0.124712	0.960131	8.56246	0.671633
Phf3	1:30837105-30863255	26150	2	1	2	|	4	1	0	||	57	78	87	|	52	69	109	||	0	0.302685	0.934328	8.58857	0.746162	||	0	0.165202	0.944221	8.58857	0.505088
Mcph1	8:18641565-18689059	47494	3	1	0	|	2	2	0	||	77	127	118	|	90	106	235	||	0	0.340254	0.934328	9.16425	0.747045	||	0	0.501381	0.61911	9.16425	0.0836111
Ppp6r1	7:4643001-4643555	554	3	0	0	|	0	2	1	||	196	206	278	|	200	134	317	||	0	0.379274	0.934328	9.85005	0.753143	||	0	0.0230961	0.988023	9.85005	0.934335
Tdrd3	14:87472076-87487287	15211	3	1	0	|	3	1	0	||	33	48	37	|	45	43	58	||	0	0.323382	0.934328	7.93185	0.754216	||	0	0.439923	0.608845	7.93185	0.0803091
Alg12	15:88811297-88812159	862	35	8	6	|	26	6	3	||	25	17	13	|	22	7	17	||	0	-0.167743	0.934328	8.70756	0.754976	||	0	-0.158681	0.961696	8.70756	0.753815
Tbcd	11:121496995-121503787	6792	2	1	1	|	2	1	1	||	82	143	154	|	146	172	239	||	0	0.323638	0.934328	9.45902	0.757177	||	0	0.699304	0.190612	9.45902	0.00700166
Wdr37	13:8842730-8849669	6939	2	1	1	|	3	0	1	||	58	71	69	|	50	50	65	||	0	0.317258	0.934328	8.3092	0.757945	||	0	-0.129601	0.944221	8.3092	0.557193
Utp11	4:124682193-124683855	1662	4	1	0	|	1	2	0	||	86	68	57	|	90	45	43	||	0	-0.343187	0.934328	8.42837	0.758748	||	0	-0.0800431	0.982691	8.42837	0.848066
Kansl1l	1:66801049-66807604	6555	1	1	3	|	4	0	1	||	44	73	61	|	22	15	20	||	0	0.288154	0.934328	7.80502	0.75879	||	0	-1.48195	0.000179641	7.80502	1.28033e-06
Rprd1b	2:158035996-158058827	22831	1	1	2	|	2	1	1	||	42	66	61	|	34	36	59	||	0	0.316391	0.934328	8.05717	0.759112	||	0	-0.264706	0.878017	8.05717	0.272611
Vmp1	11:86661123-86665878	4755	2	0	4	|	3	0	1	||	298	207	230	|	263	164	268	||	0	-0.299021	0.934328	10.005	0.760432	||	0	0.0190608	0.989186	10.005	0.953137
Rnf216	5:143090120-143090929	809	6	4	2	|	6	3	2	||	31	48	43	|	31	43	60	||	0	0.193089	0.934328	8.1477	0.760704	||	0	0.260195	0.891852	8.1477	0.317407
Med13l	5:118671013-118680971	9958	3	1	0	|	3	1	0	||	153	201	225	|	141	132	358	||	0	0.32206	0.934328	9.73089	0.76148	||	0	0.180403	0.944221	9.73089	0.551683
Ghr	15:3327974-3458008	130034	2	0	0	|	0	1	0	||	23	7	11	|	33	61	24	||	0	-0.546297	0.934328	7.31383	0.762547	||	0	1.67883	0.214	7.31383	0.0085647
Dock10	1:80572457-80578708	6251	2	0	1	|	0	0	3	||	73	155	131	|	65	75	76	||	0	0.360747	0.934328	8.82976	0.764396	||	0	-0.547505	0.535321	8.82976	0.058687
Morc3	16:93849130-93853898	4768	9	4	1	|	9	0	1	||	200	211	203	|	161	152	172	||	0	-0.19476	0.934328	9.80272	0.765234	||	0	-0.193492	0.944221	9.80272	0.47101
Ube2k	5:65565989-65581468	15479	2	3	1	|	2	0	2	||	315	218	150	|	256	178	198	||	0	-0.299017	0.934328	9.92827	0.766678	||	0	0.0103293	0.993747	9.92827	0.979003
Chchd6	6:89567587-89569412	1825	0	1	2	|	2	0	0	||	25	27	12	|	30	22	10	||	0	-0.418035	0.934328	7.05062	0.767751	||	0	0.1637	0.965408	7.05062	0.780689
Mta1	12:113112146-113123234	11088	1	1	2	|	3	0	1	||	26	40	41	|	30	30	37	||	0	0.305573	0.934328	7.62378	0.767769	||	0	0.00168353	0.998257	7.62378	0.995339
St3gal5	6:72128264-72132163	3899	2	0	2	|	3	0	1	||	212	270	186	|	184	150	314	||	0	0.310046	0.934328	9.85554	0.767916	||	0	0.0415915	0.982691	9.85554	0.876847
Scaper	9:55858081-55859918	1837	1	2	1	|	2	1	1	||	33	68	51	|	24	30	50	||	0	0.307806	0.934328	7.86766	0.768353	||	0	-0.419611	0.757679	7.86766	0.157986
Snx5	2:144255340-144257993	2653	4	0	0	|	4	0	0	||	608	458	473	|	698	437	381	||	0	0.325296	0.934328	10.9275	0.768557	||	0	0.149081	0.961696	10.9275	0.722237
Rb1	14:73262529-73273746	11217	1	3	0	|	1	3	0	||	123	250	217	|	118	187	359	||	0	0.313864	0.934328	9.78328	0.770396	||	0	0.266081	0.944221	9.78328	0.442118
not_annotated	13:23739296-23739355	59	2	1	0	|	1	0	2	||	7134	6357	6200	|	7478	4411	6585	||	0	0.37256	0.934328	14.1151	0.7704	||	0	0.0358026	0.988023	14.1238	0.943029
Mboat2	12:24878191-24934622	56431	2	0	2	|	2	1	1	||	98	38	82	|	82	18	68	||	0	0.331835	0.934328	8.39635	0.770687	||	0	-0.312311	0.944221	8.39635	0.542051
Elf1	14:79536123-79536422	299	2	0	2	|	3	0	1	||	227	300	313	|	195	147	150	||	0	0.307836	0.934328	9.88515	0.770769	||	0	-0.586836	0.466873	9.88515	0.0430338
Rp2	X:20376881-20381819	4938	2	1	0	|	0	0	3	||	128	161	148	|	132	96	184	||	0	0.347108	0.934328	9.3123	0.77109	||	0	0.0253449	0.987888	9.3123	0.914748
Rere	4:150468695-150477468	8773	3	0	0	|	1	1	1	||	29	43	36	|	28	24	32	||	0	0.341579	0.934328	7.51173	0.773536	||	0	-0.223	0.944221	7.51173	0.421684
Nedd9	13:41338577-41339020	443	3	0	1	|	4	0	0	||	141	172	168	|	111	53	80	||	0	0.304986	0.934328	9.13909	0.773792	||	0	-0.819795	0.224456	9.13909	0.00935232
Wdr91	6:34886066-34891537	5471	2	0	1	|	0	0	3	||	41	53	47	|	48	55	78	||	0	0.339869	0.934328	8.13756	0.774221	||	0	0.482125	0.459373	8.13756	0.0400441
Gclc	9:77775079-77779635	4556	4	1	1	|	4	0	0	||	140	148	182	|	121	100	255	||	0	-0.276637	0.934328	9.46169	0.774297	||	0	0.0812825	0.965408	9.46169	0.773863
E2f5	3:14587310-14588313	1003	4	0	2	|	4	0	0	||	7	9	4	|	5	3	3	||	0	-0.287301	0.934328	5.87511	0.774573	||	0	-0.687301	0.877601	5.87511	0.26961
Adam9	8:24978428-24982122	3694	3	0	0	|	2	1	0	||	39	57	49	|	51	62	36	||	0	0.348671	0.934328	8.05291	0.774679	||	0	0.250283	0.944221	8.05291	0.484959
Usp7	16:8701962-8703546	1584	2	1	0	|	1	0	2	||	290	501	491	|	274	342	833	||	0	0.349549	0.934328	10.6981	0.775126	||	0	0.242684	0.944221	10.6981	0.47628
Vps45	3:96041338-96042928	1590	3	0	0	|	2	0	1	||	56	36	55	|	26	16	36	||	0	0.345934	0.934328	7.69584	0.775235	||	0	-0.826335	0.340492	7.69584	0.0200892
Pde5a	3:122781567-122818067	36500	1	2	3	|	1	3	0	||	46	64	59	|	37	31	30	||	0	-0.271555	0.934328	7.98001	0.775699	||	0	-0.618621	0.411563	7.98001	0.0329431
Fanci	7:79433183-79438400	5217	2	1	0	|	1	1	1	||	63	48	84	|	59	42	144	||	0	0.347821	0.934328	8.48471	0.775785	||	0	0.35713	0.891852	8.48471	0.315606
Slc10a7	8:78515586-78531158	15572	2	2	0	|	4	0	0	||	74	97	64	|	61	41	72	||	0	0.296503	0.934328	8.44634	0.775898	||	0	-0.311663	0.856165	8.44634	0.238383
Dennd1b	1:139040000-139062971	22971	2	1	1	|	4	0	0	||	66	85	68	|	58	35	47	||	0	0.296237	0.934328	8.29579	0.776634	||	0	-0.493629	0.606392	8.29579	0.0774613
Mbnl1	3:60595594-60603894	8300	2	1	0	|	1	0	2	||	706	992	829	|	661	682	891	||	0	0.342026	0.934328	11.4174	0.77699	||	0	-0.0343361	0.985671	11.4174	0.903247
Sart3	5:113758139-113764199	6060	3	0	0	|	2	0	1	||	22	34	49	|	30	29	49	||	0	0.339634	0.934328	7.62275	0.777066	||	0	0.167869	0.947086	7.62275	0.593841
Ambra1	2:91805024-91810209	5185	2	2	2	|	2	0	2	||	71	72	74	|	43	38	63	||	0	-0.266009	0.934328	8.3276	0.777196	||	0	-0.477462	0.450649	8.3276	0.0385424
Ash1l	3:88965812-88985790	19978	1	0	2	|	0	1	2	||	56	111	88	|	50	57	74	||	0	0.337185	0.934328	8.49038	0.777349	||	0	-0.342908	0.773293	8.49038	0.179184
Fut8	12:77435820-77436468	648	3	0	0	|	2	0	1	||	16	22	19	|	14	19	28	||	0	0.337424	0.934328	6.95385	0.777732	||	0	0.21464	0.944221	6.95385	0.535993
Cpeb3	19:37044522-37054374	9852	2	0	2	|	2	1	1	||	6	26	30	|	4	20	40	||	0	0.335032	0.934328	7.03777	0.778351	||	0	0.138458	0.975877	7.03777	0.829256
Dtx3l	16:35929303-35931590	2287	2	0	1	|	1	2	0	||	27	35	46	|	26	26	41	||	0	0.334752	0.934328	7.5594	0.778478	||	0	-0.0894578	0.961696	7.5594	0.75411
Atp11b	3:35778025-35789661	11636	3	0	0	|	2	0	1	||	86	130	100	|	90	95	124	||	0	0.334122	0.934328	8.94173	0.77875	||	0	0.108209	0.955694	8.94173	0.636483
Arid4a	12:71060062-71063324	3262	1	2	0	|	0	1	2	||	42	79	61	|	33	55	88	||	0	0.337981	0.934328	8.24393	0.778838	||	0	0.0656108	0.975877	8.24393	0.82911
Stag1	9:100705153-100738142	32989	2	1	0	|	1	0	2	||	110	110	134	|	104	104	148	||	0	0.333257	0.934328	9.10457	0.779351	||	0	0.129572	0.944221	9.10457	0.567598
Crkl	16:17468893-17469358	465	3	0	0	|	2	1	0	||	43	47	50	|	28	28	39	||	0	0.331875	0.934328	7.74847	0.77952	||	0	-0.43206	0.662285	7.74847	0.0956808
Dnajb6	5:29764399-29766395	1996	7	0	2	|	4	0	2	||	270	195	200	|	268	216	311	||	0	-0.227134	0.934328	10.0685	0.780757	||	0	0.358903	0.856165	10.0685	0.23823
Arglu1	8:8681384-8683973	2589	1	1	2	|	3	0	1	||	193	306	221	|	192	214	230	||	0	0.29178	0.934328	9.91298	0.781052	||	0	-0.0125536	0.989893	9.91298	0.962423
Cdk8	5:146259505-146271735	12230	3	2	1	|	2	1	1	||	76	85	88	|	79	71	95	||	0	-0.258987	0.934328	8.71594	0.78312	||	0	0.109686	0.953258	8.71594	0.615646
Vps13b	15:35533296-35576526	43230	5	1	3	|	2	3	1	||	117	256	178	|	81	124	215	||	0	-0.224385	0.934328	9.5385	0.784513	||	0	-0.278348	0.934146	9.5385	0.384047
Pwwp2a	11:43704534-43705477	943	9	1	0	|	7	0	2	||	26	38	35	|	13	22	23	||	0	0.196531	0.934328	7.53994	0.785168	||	0	-0.623056	0.609483	7.53994	0.0808634
Usp32	11:85077265-85083894	6629	1	1	3	|	4	0	1	||	116	215	216	|	137	162	349	||	0	0.261713	0.934328	9.73998	0.785414	||	0	0.335584	0.878017	9.73998	0.279999
Strn3	12:51619814-51661713	41899	2	1	0	|	2	0	1	||	75	83	76	|	70	86	109	||	0	0.322816	0.934328	8.67587	0.78574	||	0	0.304025	0.783848	8.67587	0.185837
Ranbp9	13:43434814-43436142	1328	1	1	1	|	1	2	0	||	63	88	71	|	43	63	80	||	0	0.322885	0.934328	8.41813	0.785999	||	0	-0.126438	0.949762	8.41813	0.606454
Clec12a	6:129353352-129359511	6159	4	1	0	|	1	0	2	||	637	459	377	|	748	184	617	||	0	-0.313603	0.934328	10.8878	0.786337	||	0	0.145303	0.961696	10.8878	0.766076
Ppp6r2	15:89253019-89256849	3830	3	0	0	|	3	0	0	||	68	88	114	|	88	108	177	||	0	0.323895	0.934328	8.96622	0.786492	||	0	0.576988	0.380534	8.96622	0.0259978
Ttc3	16:94403314-94412123	8809	4	1	1	|	3	0	1	||	54	93	62	|	55	54	54	||	0	-0.258452	0.934328	8.37007	0.786535	||	0	-0.188203	0.944221	8.37007	0.494775
Pms1	1:53256629-53290423	33794	0	0	3	|	0	1	2	||	22	28	16	|	16	11	19	||	0	0.328071	0.934328	6.9034	0.786922	||	0	-0.396571	0.901905	6.9034	0.329896
Foxn3	12:99388361-99388917	556	3	1	2	|	2	1	1	||	67	129	97	|	85	59	92	||	0	-0.257574	0.934328	8.78075	0.786936	||	0	-0.158878	0.944221	8.78075	0.539308
Atp8b4	2:126458243-126462721	4478	7	3	5	|	9	1	1	||	106	136	150	|	172	149	263	||	0	-0.166513	0.934328	9.68036	0.78699	||	0	0.689107	0.133081	9.68036	0.00408583
Cyth3	5:143684396-143687044	2648	3	0	0	|	3	0	0	||	151	116	164	|	183	148	264	||	0	0.32396	0.934328	9.55259	0.787482	||	0	0.556566	0.466873	9.55259	0.0424792
Stag1	9:100834418-100848738	14320	3	0	0	|	3	0	0	||	125	243	198	|	129	158	252	||	0	0.323963	0.934328	9.61574	0.787518	||	0	0.0579119	0.977962	9.61574	0.832151
Stag1	9:100834418-100855904	21486	3	0	0	|	3	0	0	||	145	270	213	|	146	183	291	||	0	0.323966	0.934328	9.76555	0.787577	||	0	0.106347	0.961696	9.76555	0.696957
S100pbp	4:129178241-129183717	5476	3	0	0	|	3	0	0	||	33	47	36	|	32	39	32	||	0	0.32397	0.934328	7.68202	0.787634	||	0	-0.00195765	0.998257	7.68202	0.994957
Ide	19:37325148-37330612	5464	2	1	0	|	2	0	1	||	33	54	35	|	44	33	40	||	0	0.322313	0.934328	7.78134	0.787974	||	0	0.0962716	0.961696	7.78134	0.753524
Cep63	9:102618811-102619760	949	3	0	0	|	3	0	0	||	44	30	41	|	43	36	43	||	0	0.323995	0.934328	7.78267	0.788015	||	0	0.212002	0.944221	7.78267	0.519047
Atf7ip	6:136563760-136571538	7778	3	2	1	|	2	1	1	||	83	245	188	|	70	83	174	||	0	-0.261929	0.934328	9.30298	0.790938	||	0	-0.540935	0.705491	9.30298	0.122997
Osbpl1a	18:12871078-12898301	27223	1	0	2	|	2	1	0	||	31	29	33	|	42	46	78	||	0	0.314612	0.934328	7.87338	0.791196	||	0	0.933224	0.0286524	7.87338	0.0005153
Diaph3	14:86772086-86810471	38385	4	1	1	|	3	0	1	||	94	134	164	|	89	105	274	||	0	-0.259418	0.934328	9.33382	0.791386	||	0	0.312082	0.903988	9.33382	0.344625
Tns3	11:8478225-8479665	1440	3	0	3	|	2	2	0	||	45	38	31	|	38	23	49	||	0	-0.254877	0.934328	7.77216	0.791684	||	0	0.0383543	0.986509	7.77216	0.907004
Atad2b	12:4961218-5006791	45573	2	1	0	|	2	1	0	||	45	95	67	|	28	59	89	||	0	0.320965	0.934328	8.31763	0.791713	||	0	-0.115482	0.961696	8.31763	0.736937
Usp15	10:123145397-123145440	43	0	0	3	|	0	0	3	||	13	38	45	|	13	49	65	||	0	0.3405	0.934328	7.67382	0.794654	||	0	0.539545	0.917494	7.67382	0.361285
Gm26917	17:39844698-39845193	495	1	0	2	|	1	0	2	||	250	155	282	|	484	102	402	||	0	0.332483	0.934328	10.1598	0.794867	||	0	0.608741	0.833129	10.1598	0.221528
Ccnt2	1:127791605-127799553	7948	4	1	1	|	2	1	1	||	98	149	130	|	87	114	124	||	0	-0.246348	0.934328	9.13129	0.795534	||	0	-0.0583999	0.972297	9.13129	0.810307
Fbxo34	14:47504986-47509229	4243	4	0	1	|	0	3	0	||	14	25	36	|	16	41	53	||	0	-0.290434	0.934328	7.50088	0.796217	||	0	0.67888	0.740698	7.50088	0.14235
Nvl	1:181134792-181136930	2138	5	0	1	|	3	0	1	||	114	155	113	|	104	119	151	||	0	-0.244969	0.934328	9.21961	0.796761	||	0	0.104378	0.960131	9.21961	0.667955
Klhdc2	12:69302324-69303962	1638	6	4	6	|	8	2	2	||	212	144	162	|	266	177	277	||	0	-0.162431	0.934328	9.9986	0.797471	||	0	0.575511	0.558678	9.9986	0.0646278
Kat6a	8:22861517-22862801	1284	1	2	0	|	2	1	0	||	102	168	197	|	99	79	159	||	0	0.304952	0.934328	9.2253	0.798991	||	0	-0.34999	0.783258	9.2253	0.18465
Bbs9	9:22643745-22679064	35319	4	2	0	|	2	0	2	||	27	36	25	|	20	10	22	||	0	-0.244595	0.934328	7.2283	0.799278	||	0	-0.633066	0.606167	7.2283	0.0759838
Rbm39	2:156177633-156178952	1319	20	6	2	|	13	2	5	||	206	253	226	|	286	321	315	||	0	-0.130625	0.934328	10.429	0.799367	||	0	0.594232	0.466873	10.429	0.0415201
Dguok	6:83486984-83490608	3624	2	0	0	|	0	0	2	||	62	69	43	|	55	25	48	||	0	0.3723	0.934328	8.02831	0.799668	||	0	-0.320426	0.917494	8.02831	0.36042
Bub1b	2:118617706-118617935	229	2	1	0	|	3	0	0	||	201	311	316	|	216	203	441	||	0	0.304627	0.934328	10.1261	0.799896	||	0	0.1473	0.944221	10.1261	0.585997
Cul1	6:47501168-47502590	1422	3	1	2	|	1	3	0	||	237	251	248	|	314	247	330	||	0	-0.242634	0.934328	10.162	0.800143	||	0	0.413654	0.691086	10.162	0.106975
Kdm3b	18:34793004-34799359	6355	2	0	1	|	3	0	0	||	35	69	83	|	26	38	70	||	0	0.3035	0.934328	8.09334	0.801993	||	0	-0.365565	0.878017	8.09334	0.277066
Ptbp3	4:59514274-59517755	3481	3	1	2	|	1	1	2	||	460	683	564	|	519	458	687	||	0	-0.240547	0.934328	11.015	0.80247	||	0	0.100032	0.961696	11.015	0.70231
Man2a1	17:64710704-64714712	4008	2	1	0	|	3	0	0	||	60	81	90	|	69	99	69	||	0	0.301281	0.934328	8.61296	0.80298	||	0	0.233572	0.944221	8.61296	0.457172
Pcm1	8:41312158-41313981	1823	2	0	0	|	0	0	2	||	56	130	82	|	55	84	104	||	0	0.36404	0.934328	8.65806	0.803161	||	0	0.0129186	0.98992	8.65806	0.966581
Pdia5	16:35449403-35456545	7142	2	0	0	|	1	1	0	||	9	7	14	|	17	9	5	||	0	0.377741	0.934328	6.24727	0.803452	||	0	0.246652	0.960131	6.24727	0.679567
Gpatch2l	12:86260577-86269061	8484	5	0	1	|	3	1	0	||	52	32	59	|	42	35	49	||	0	-0.239305	0.934328	7.99077	0.804513	||	0	-0.0666176	0.980863	7.99077	0.83757
Camta1	4:151830418-151835883	5465	7	2	0	|	4	1	1	||	82	37	39	|	63	30	43	||	0	-0.218023	0.934328	8.20161	0.804702	||	0	-0.118433	0.971579	8.20161	0.798835
Tfrc	16:32618218-32619176	958	10	1	0	|	9	0	1	||	2806	2041	2502	|	1807	1124	2723	||	0	0.199342	0.934328	12.691	0.805109	||	0	-0.324307	0.944221	12.691	0.506853
Adpgk	9:59297526-59303551	6025	7	1	1	|	5	1	2	||	261	196	260	|	170	53	280	||	0	0.203786	0.934328	9.82814	0.805168	||	0	-0.495696	0.856165	9.82814	0.246183
Ubr3	2:69934389-69938312	3923	2	0	0	|	0	2	0	||	63	137	120	|	72	96	105	||	0	0.358377	0.934328	8.84727	0.805661	||	0	-0.0551959	0.982691	8.84727	0.84826
Mier1	4:103139358-103150628	11270	4	1	1	|	2	2	0	||	59	148	121	|	84	131	157	||	0	-0.238529	0.934328	9.11845	0.80647	||	0	0.346869	0.877601	9.11845	0.26992
Atxn2	5:121745723-121749229	3506	6	1	3	|	4	2	1	||	32	43	53	|	22	15	40	||	0	-0.18114	0.934328	7.77215	0.808379	||	0	-0.625943	0.466873	7.77215	0.0412522
Myef2	2:125116665-125116873	208	2	0	0	|	0	0	2	||	92	141	97	|	82	108	139	||	0	0.350287	0.934328	8.98403	0.809069	||	0	0.129367	0.949762	8.98403	0.610784
Slc43a1	2:84859689-84861499	1810	11	2	1	|	7	3	2	||	632	535	497	|	400	294	695	||	0	0.158971	0.934328	10.9676	0.809359	||	0	-0.210289	0.944221	10.9676	0.515487
Kmt2a	9:44828784-44829271	487	2	0	0	|	1	1	0	||	20	60	63	|	15	24	38	||	0	0.355552	0.934328	7.60058	0.810154	||	0	-0.745344	0.598665	7.60058	0.0728638
Ptbp3	4:59514274-59524476	10202	19	6	5	|	14	3	5	||	427	639	552	|	474	400	642	||	0	-0.116524	0.934328	11.1361	0.811047	||	0	0.0382089	0.983222	11.1361	0.885561
Mms22l	4:24505345-24578903	73558	2	0	0	|	0	2	0	||	46	73	84	|	58	68	100	||	0	0.344287	0.934328	8.44687	0.81173	||	0	0.28631	0.856165	8.44687	0.245985
Rhbdd1	1:82340319-82342862	2543	5	0	1	|	2	2	0	||	49	38	41	|	41	47	49	||	0	-0.227688	0.934328	7.98548	0.812117	||	0	0.2273	0.944221	7.98548	0.450401
Ccne2	4:11193926-11199431	5505	2	0	0	|	1	0	1	||	450	329	345	|	325	208	449	||	0	0.34721	0.934328	10.411	0.812736	||	0	-0.129971	0.960131	10.411	0.678978
Nab1	1:52479238-52490755	11517	2	0	0	|	1	1	0	||	39	37	35	|	46	27	30	||	0	0.346096	0.934328	7.62795	0.813213	||	0	0.047295	0.985324	7.62795	0.895837
Ezh2	6:47551732-47558294	6562	7	5	7	|	8	6	3	||	230	364	306	|	178	107	304	||	0	0.13306	0.934328	10.2203	0.813347	||	0	-0.527121	0.589149	10.2203	0.0697058
Fbxw4	19:45630865-45640521	9656	5	2	2	|	3	4	1	||	35	24	30	|	29	21	47	||	0	0.177223	0.934328	7.6933	0.813423	||	0	0.203187	0.944221	7.6933	0.538943
Camsap1	2:25965663-25966948	1285	11	0	3	|	7	0	5	||	35	28	36	|	23	26	43	||	0	0.147392	0.934328	7.89208	0.813551	||	0	-0.00801795	0.994016	7.89208	0.980392
Reep3	10:67034599-67036005	1406	2	0	0	|	0	0	2	||	82	117	97	|	75	64	93	||	0	0.339717	0.934328	8.70663	0.813688	||	0	-0.215339	0.896398	8.70663	0.325288
2002-03-01	1:184832576-184841427	8851	1	0	2	|	2	0	0	||	317	193	190	|	333	137	154	||	0	-0.325673	0.934328	9.89949	0.814338	||	0	-0.0186083	0.989922	9.89949	0.968213
Mpp6	6:50143719-50163649	19930	12	3	2	|	8	1	3	||	53	40	39	|	72	58	41	||	0	-0.152888	0.934328	8.47459	0.814837	||	0	0.546014	0.757679	8.47459	0.1565
Asb3	11:31055458-31061586	6128	5	1	3	|	3	3	2	||	51	58	51	|	45	31	55	||	0	0.169174	0.934328	8.19025	0.815978	||	0	-0.169222	0.944221	8.19025	0.498433
Uty	Y:1186774-1199513	12739	2	0	0	|	1	0	0	||	50	0	101	|	66	0	0	||	0	-0.566278	0.934328	7.63501	0.816719	||	0	-0.926165	0.947086	7.63501	0.592727
Hk1	10:62284279-62286652	2373	1	2	0	|	2	0	0	||	118	163	199	|	105	93	343	||	0	-0.314018	0.934328	9.48141	0.816817	||	0	0.19575	0.949762	9.48141	0.60365
Zfp280d	9:72307951-72312760	4809	2	0	0	|	1	1	0	||	61	90	111	|	73	84	107	||	0	0.334019	0.934328	8.70339	0.817293	||	0	0.157257	0.944221	8.70339	0.520155
Exoc5	14:49035999-49039383	3384	2	0	0	|	1	1	0	||	122	123	145	|	97	108	135	||	0	0.333665	0.934328	9.1158	0.817416	||	0	-0.0674145	0.965408	9.1158	0.7719
Pkn2	3:142839208-142853714	14506	1	1	0	|	0	2	0	||	178	229	209	|	153	176	282	||	0	0.334182	0.934328	9.74355	0.817532	||	0	0.0971479	0.961696	9.74355	0.685751
Rbms1	2:60779731-60797742	18011	2	0	0	|	1	0	1	||	54	81	66	|	70	69	75	||	0	0.332668	0.934328	8.42543	0.81772	||	0	0.247094	0.884914	8.42543	0.304334
Xpo1	11:23261835-23271205	9370	0	3	0	|	2	0	0	||	201	257	281	|	143	181	320	||	0	-0.305827	0.934328	9.88678	0.817806	||	0	-0.102782	0.961696	9.88678	0.703548
Diaph3	14:86828992-86866642	37650	1	2	0	|	3	0	0	||	107	164	173	|	110	118	286	||	0	0.277842	0.934328	9.43177	0.817945	||	0	0.283295	0.904279	9.43177	0.346477
Mllt10	2:18092784-18123812	31028	1	1	0	|	0	0	2	||	97	115	97	|	73	63	117	||	0	0.3313	0.934328	8.78008	0.81837	||	0	-0.1845	0.944221	8.78008	0.414852
Rsbn1l	5:20919525-20927730	8205	2	0	0	|	1	1	0	||	48	58	64	|	34	43	63	||	0	0.33088	0.934328	8.04582	0.818385	||	0	-0.159868	0.944221	8.04582	0.509581
Thoc7	14:13950132-13951263	1131	1	2	0	|	2	0	0	||	436	386	282	|	580	372	439	||	0	-0.31019	0.934328	10.663	0.818485	||	0	0.474456	0.783848	10.663	0.185383
Rhbdd1	1:82368292-82377704	9412	0	0	3	|	3	0	0	||	45	47	37	|	42	54	49	||	0	0.274549	0.934328	7.96283	0.819083	||	0	0.316257	0.888683	7.96283	0.311587
R3hdm1	1:128151744-128153399	1655	6	0	0	|	2	2	0	||	42	65	75	|	34	49	74	||	0	-0.217582	0.934328	8.23602	0.819722	||	0	-0.0898053	0.961696	8.23602	0.749056
Vrk1	12:106036540-106062808	26268	0	1	2	|	2	0	0	||	269	280	280	|	330	229	375	||	0	-0.297421	0.934328	10.2112	0.822485	||	0	0.291803	0.872095	10.2112	0.261877
Dennd4a	9:64835286-64842689	7403	6	1	1	|	3	4	0	||	212	348	416	|	301	405	635	||	0	0.181255	0.934328	10.584	0.822654	||	0	0.582783	0.525726	10.584	0.0541866
Ints8	4:11245724-11246146	422	2	0	0	|	2	0	0	||	77	96	85	|	54	52	63	||	0	0.322518	0.934328	8.44615	0.822786	||	0	-0.469571	0.443194	8.44615	0.0374188
Tcf20	15:82825231-82857284	32053	8	12	8	|	6	5	10	||	37	55	71	|	37	34	81	||	0	-0.116815	0.934328	8.81008	0.822795	||	0	-0.00912031	0.993747	8.81008	0.978863
Mtr	13:12239649-12247985	8336	1	0	1	|	1	1	0	||	65	99	97	|	88	98	138	||	0	0.322884	0.934328	8.83802	0.822801	||	0	0.445506	0.485219	8.83802	0.0454893
Nsd1	13:55213204-55238862	25658	0	2	1	|	3	0	0	||	92	152	157	|	119	153	147	||	0	0.268418	0.934328	9.28786	0.82304	||	0	0.243794	0.934146	9.28786	0.382998
Tasp1	2:139996073-140057499	61426	2	0	0	|	2	0	0	||	50	52	41	|	46	46	58	||	0	0.322554	0.934328	7.99721	0.823217	||	0	0.194792	0.944221	7.99721	0.456921
Kif16b	2:142739523-142740991	1468	2	0	0	|	2	0	0	||	27	37	33	|	26	36	41	||	0	0.322558	0.934328	7.52797	0.823275	||	0	0.221965	0.944221	7.52797	0.440171
Papola	12:105799651-105820450	20799	2	0	0	|	2	0	0	||	172	198	210	|	153	159	192	||	0	0.322581	0.934328	9.60124	0.823559	||	0	-0.0595036	0.971579	9.60124	0.801286
Azin1	15:38497264-38501600	4336	0	0	2	|	0	0	2	||	296	519	474	|	316	288	643	||	0	0.325324	0.934328	10.6092	0.823591	||	0	0.0474325	0.982691	10.6092	0.870128
Qk	17:10238893-10282981	44088	2	0	0	|	2	0	0	||	186	252	218	|	183	174	220	||	0	0.322587	0.934328	9.75651	0.823622	||	0	-0.0377174	0.982691	9.75651	0.873789
Rnf168	16:32282311-32289240	6929	2	0	0	|	2	0	0	||	67	76	95	|	77	89	165	||	0	0.322587	0.934328	8.79004	0.823623	||	0	0.568198	0.380534	8.79004	0.0255127
Atrx	X:105899881-105911654	11773	2	0	0	|	2	0	0	||	70	112	87	|	56	85	97	||	0	0.322592	0.934328	8.65623	0.823692	||	0	-0.0312181	0.985671	8.65623	0.904393
Prrc2c	1:162715392-162716361	969	2	0	0	|	2	0	0	||	206	292	257	|	123	155	211	||	0	0.322597	0.934328	9.74967	0.82375	||	0	-0.495891	0.466873	9.74967	0.0424961
Tgfbr2	9:116129816-116131713	1897	1	1	1	|	2	0	0	||	59	50	67	|	62	40	33	||	0	-0.299448	0.934328	8.10193	0.823854	||	0	-0.200877	0.944221	8.10193	0.585925
Zfp638	6:83954711-83957592	2881	1	1	0	|	1	1	0	||	73	147	115	|	73	61	105	||	0	0.320956	0.934328	8.79246	0.824442	||	0	-0.348719	0.764529	8.79246	0.166334
Qser1	2:104776172-104780260	4088	2	0	0	|	2	0	0	||	25	44	29	|	25	28	25	||	0	0.322664	0.934328	7.37779	0.824583	||	0	-0.159138	0.955694	7.37779	0.643318
Rabgap1l	1:160627215-160645401	18186	2	0	0	|	2	0	0	||	68	113	126	|	72	112	177	||	0	0.32267	0.934328	8.98186	0.824648	||	0	0.349722	0.85179	8.98186	0.232504
Vezf1	11:88073057-88078555	5498	0	2	0	|	0	0	2	||	54	50	49	|	42	32	48	||	0	0.320107	0.934328	7.9181	0.824705	||	0	-0.206228	0.944221	7.9181	0.450538
Nptn	9:58640669-58643802	3133	2	0	0	|	2	0	0	||	452	416	376	|	415	327	437	||	0	0.322685	0.934328	10.5959	0.824842	||	0	0.0479551	0.982691	10.5959	0.86637
Rnf2	1:151473072-151478625	5553	2	0	0	|	2	0	0	||	62	70	70	|	66	54	42	||	0	0.322688	0.934328	8.27427	0.824883	||	0	-0.132075	0.960131	8.27427	0.678296
Erc1	6:119824386-119825819	1433	2	0	0	|	2	0	0	||	11	17	11	|	12	11	25	||	0	0.322696	0.934328	6.56876	0.824973	||	0	0.393014	0.903988	6.56876	0.343627
Ctbp1	5:33259138-33261153	2015	2	0	0	|	2	0	0	||	239	241	261	|	251	127	320	||	0	0.322702	0.934328	9.93333	0.825056	||	0	0.000868123	0.99876	9.93333	0.997665
Pole2	12:69213829-69222070	8241	2	0	0	|	2	0	0	||	96	83	77	|	84	38	85	||	0	0.322703	0.934328	8.55095	0.825068	||	0	-0.207922	0.944221	8.55095	0.513035
Clk1	1:58417013-58417383	370	2	0	0	|	2	0	0	||	410	484	508	|	345	434	332	||	0	0.322743	0.934328	10.6435	0.825563	||	0	-0.143581	0.955694	10.6435	0.646678
Chmp3	6:71552399-71579836	27437	2	0	0	|	2	0	0	||	314	222	205	|	237	156	242	||	0	0.322773	0.934328	9.9075	0.825948	||	0	-0.124575	0.961696	9.9075	0.707161
Lmo4	3:144193896-144194503	607	1	1	1	|	2	0	0	||	152	187	128	|	93	99	70	||	0	-0.294503	0.934328	9.13577	0.825999	||	0	-0.642551	0.510574	9.13577	0.0515052
Itpr2	6:146156970-146159017	2047	1	2	0	|	2	0	0	||	27	51	63	|	15	13	29	||	0	-0.293024	0.934328	7.49592	0.826139	||	0	-1.17601	0.0566028	7.49592	0.00117922
Helz	11:107632172-107635098	2926	2	0	0	|	2	0	0	||	15	51	37	|	21	23	33	||	0	0.322798	0.934328	7.37618	0.826259	||	0	-0.255845	0.944221	7.37618	0.51807
Pms1	1:53256629-53282092	25463	4	2	3	|	3	3	2	||	29	32	29	|	25	17	27	||	0	0.160048	0.934328	7.52839	0.826269	||	0	-0.255497	0.934366	7.52839	0.391653
Tlk1	2:70786877-70803133	16256	1	1	0	|	1	0	1	||	167	122	104	|	69	94	107	||	0	0.320281	0.934328	9.00958	0.826657	||	0	-0.438638	0.773269	9.00958	0.17213
Glb1	9:114450597-114459725	9128	2	0	0	|	2	0	0	||	40	30	19	|	40	29	27	||	0	0.322938	0.934328	7.4667	0.828048	||	0	0.25005	0.944221	7.4667	0.574219
Uri1	7:37981611-37996721	15110	2	0	0	|	2	0	0	||	27	23	40	|	36	62	32	||	0	0.322953	0.934328	7.68364	0.828237	||	0	0.733423	0.671132	7.68364	0.099277
Cct4	11:22995930-22996457	527	2	0	0	|	2	0	0	||	526	293	359	|	579	343	352	||	0	0.322992	0.934328	10.6441	0.828739	||	0	0.252623	0.944221	10.6441	0.547105
D230025D16Rik	8:105240841-105248786	7945	1	1	0	|	2	0	0	||	60	56	62	|	88	71	102	||	0	0.311801	0.934328	8.50075	0.828764	||	0	0.675472	0.13706	8.50075	0.00428312
Ube3a	7:59240967-59262058	21091	2	0	0	|	2	0	0	||	29	13	12	|	19	18	25	||	0	0.323001	0.934328	6.91457	0.828859	||	0	0.271649	0.944221	6.91457	0.581257
Plce1	19:38523915-38525452	1537	2	0	0	|	2	0	0	||	2	1	3	|	1	1	0	||	0	0.323004	0.934328	4.94435	0.828893	||	0	-1.18651	0.833137	4.94435	0.223357
Ttll3	6:113393103-113395095	1992	2	0	0	|	2	0	0	||	8	27	19	|	7	15	10	||	0	0.323033	0.934328	6.56104	0.829267	||	0	-0.540267	0.885687	6.56104	0.307291
Gtpbp2	17:46159771-46168214	8443	0	0	2	|	0	0	2	||	82	193	237	|	31	92	359	||	0	0.336755	0.934328	9.40877	0.830399	||	0	-0.0946259	0.983222	9.40877	0.881736
Rsrc1	3:66994517-66996590	2073	7	1	3	|	7	0	1	||	78	87	77	|	82	60	70	||	0	-0.152384	0.934328	8.7394	0.830755	||	0	-0.0390294	0.983222	8.7394	0.886207
Tlk1	2:70802980-70806669	3689	0	2	0	|	0	2	0	||	27	41	45	|	29	65	43	||	0	0.314153	0.934328	7.82014	0.831559	||	0	0.472372	0.856165	7.82014	0.240942
Map4k5	12:69823422-69825783	2361	1	2	0	|	2	0	0	||	115	130	144	|	115	149	216	||	0	-0.279241	0.934328	9.33696	0.832486	||	0	0.415926	0.635115	9.33696	0.0899517
Fip1l1	5:74540932-74557149	16217	1	1	0	|	2	0	0	||	78	125	128	|	94	137	166	||	0	0.306296	0.934328	9.10831	0.832557	||	0	0.408526	0.702952	9.10831	0.115825
Ncoa6	2:155437860-155440785	2925	7	2	0	|	6	1	1	||	41	37	32	|	24	20	52	||	0	0.160483	0.934328	7.78693	0.832717	||	0	-0.133036	0.961696	7.78693	0.698771
Lsm14a	7:34351286-34351517	231	1	1	0	|	2	0	0	||	107	228	178	|	165	145	213	||	0	0.304224	0.934328	9.53316	0.83398	||	0	0.185264	0.944221	9.53316	0.488071
Eci1	17:24433133-24434155	1022	2	1	0	|	2	0	0	||	34	18	19	|	40	14	19	||	0	-0.292949	0.934328	7.1951	0.834294	||	0	0.170035	0.961696	7.1951	0.75601
Myo9a	9:59786814-59790092	3278	1	2	0	|	2	0	0	||	54	80	90	|	45	61	83	||	0	-0.275178	0.934328	8.41082	0.834391	||	0	-0.112361	0.955694	8.41082	0.649974
Ptpra	2:130537555-130537631	76	0	2	0	|	2	0	0	||	110	161	137	|	98	86	137	||	0	0.301206	0.934328	9.10013	0.834406	||	0	-0.217108	0.891852	9.10013	0.319776
Sntb2	8:106981126-106981339	213	1	1	1	|	2	0	0	||	18	29	26	|	18	13	21	||	0	-0.275054	0.934328	6.99267	0.834685	||	0	-0.351207	0.879216	6.99267	0.29259
Chd1	17:15742157-15743230	1073	0	0	3	|	3	0	0	||	60	179	143	|	91	101	161	||	0	0.252798	0.934328	9.11612	0.835082	||	0	0.0392837	0.986394	9.11612	0.906357
Parg	14:32238531-32242346	3815	1	2	0	|	2	0	0	||	76	107	120	|	79	85	113	||	0	-0.273444	0.934328	8.83601	0.835209	||	0	0.0112743	0.989186	8.83601	0.960443
Arhgap10	8:77382725-77411128	28403	1	1	0	|	2	0	0	||	34	28	29	|	22	13	23	||	0	0.302414	0.934328	7.18179	0.835219	||	0	-0.532763	0.731098	7.18179	0.134033
Vps13b	15:35770456-35770863	407	1	0	1	|	2	0	0	||	54	114	101	|	33	56	95	||	0	0.302318	0.934328	8.48619	0.83584	||	0	-0.431014	0.773293	8.48619	0.178087
Dnah12	14:26831301-26836765	5464	2	1	0	|	2	0	0	||	2	2	0	|	0	1	0	||	0	-0.285934	0.934328	4.87831	0.835852	||	0	-1.35958	0.831291	4.87831	0.220112
Zfp326	5:105891118-105896603	5485	1	0	2	|	2	0	0	||	34	41	31	|	27	23	29	||	0	-0.272514	0.934328	7.45576	0.836099	||	0	-0.287681	0.903967	7.45576	0.333836
Setbp1	18:79086551-79087180	629	2	0	0	|	2	0	0	||	7	5	2	|	13	2	4	||	0	0.323597	0.934328	5.70912	0.836744	||	0	0.562736	0.944221	5.70912	0.46729
Stau2	1:16440323-16509408	69085	2	1	0	|	2	0	0	||	7	10	11	|	7	8	2	||	0	-0.281909	0.934328	5.99014	0.836784	||	0	-0.498118	0.934366	5.99014	0.391582
Cdk12	11:98219074-98231085	12011	1	0	1	|	2	0	0	||	43	103	102	|	52	81	128	||	0	0.300703	0.934328	8.63993	0.836988	||	0	0.204936	0.944221	8.63993	0.530516
Ripk2	4:16151917-16158430	6513	0	2	1	|	0	1	1	||	13	23	16	|	21	9	12	||	0	-0.279315	0.934328	6.69759	0.83714	||	0	-0.132642	0.965408	6.69759	0.780319
Hmbox1	14:64896650-64897126	476	1	0	2	|	2	0	0	||	45	58	62	|	31	38	51	||	0	-0.268177	0.934328	7.96058	0.838031	||	0	-0.329265	0.779169	7.96058	0.182831
Sh3glb1	3:144705513-144712728	7215	0	0	2	|	2	0	0	||	266	334	316	|	269	231	313	||	0	0.295778	0.934328	10.1735	0.838058	||	0	-0.0299081	0.985324	10.1735	0.901593
Plekhm1	11:103386958-103387348	390	2	1	0	|	2	0	0	||	22	49	32	|	12	9	30	||	0	-0.274247	0.934328	7.19886	0.838638	||	0	-0.91474	0.384372	7.19886	0.0273949
Ltbp1	17:75065911-75066202	291	2	1	1	|	4	0	0	||	22	21	11	|	19	19	9	||	0	0.228556	0.934328	6.87225	0.839009	||	0	-0.00999874	0.996452	6.87225	0.98498
Spopl	2:23506909-23545579	38670	0	2	1	|	0	0	2	||	26	39	36	|	30	46	33	||	0	-0.270705	0.934328	7.62543	0.839415	||	0	0.29276	0.944221	7.62543	0.410793
Pgd	4:149156607-149161694	5087	2	1	0	|	2	0	0	||	95	145	107	|	97	44	95	||	0	-0.268323	0.934328	8.8319	0.840142	||	0	-0.423347	0.757679	8.8319	0.156705
AW554918	18:25339714-25344962	5248	2	1	0	|	2	0	0	||	12	26	21	|	20	14	20	||	0	-0.268051	0.934328	6.88435	0.840212	||	0	0.0246219	0.989186	6.88435	0.948582
Rabgap1	2:37469377-37475466	6089	2	1	0	|	2	0	0	||	37	58	41	|	36	35	29	||	0	-0.267996	0.934328	7.75034	0.840226	||	0	-0.263686	0.944221	7.75034	0.421469
Hmgxb3	18:61140791-61141790	999	2	1	0	|	2	0	0	||	15	32	30	|	16	20	22	||	0	-0.267437	0.934328	7.07896	0.840372	||	0	-0.249312	0.944221	7.07896	0.488047
Pcbp2	15:102473285-102478747	5462	2	1	0	|	2	0	0	||	235	294	267	|	208	138	289	||	0	-0.265862	0.934328	9.93046	0.840785	||	0	-0.222839	0.933564	9.93046	0.380209
Bcap29	12:31624115-31630893	6778	2	0	1	|	2	0	0	||	57	59	44	|	100	92	55	||	0	-0.270848	0.934328	8.46213	0.841228	||	0	0.825493	0.411146	8.46213	0.0324589
Rell1	5:63924735-63930535	5800	2	1	0	|	2	0	0	||	67	76	56	|	60	60	107	||	0	-0.26316	0.934328	8.45478	0.841503	||	0	0.286425	0.856165	8.45478	0.245162
Ogdh	11:6313788-6316855	3067	2	0	1	|	2	0	0	||	139	166	152	|	85	53	193	||	0	-0.267234	0.934328	9.1773	0.84171	||	0	-0.427335	0.783848	9.1773	0.186333
Rtfdc1	2:172444647-172447113	2466	2	0	1	|	2	0	0	||	202	165	211	|	205	187	237	||	0	-0.26406	0.934328	9.75563	0.842159	||	0	0.248771	0.914576	9.75563	0.35335
Slc9a9	9:95019105-95020712	1607	2	0	1	|	2	0	0	||	23	37	35	|	29	20	24	||	0	-0.263445	0.934328	7.33916	0.842249	||	0	-0.219242	0.944221	7.33916	0.505339
Btrc	19:45456533-45471104	14571	2	0	1	|	2	0	0	||	142	215	207	|	127	134	266	||	0	-0.263265	0.934328	9.58839	0.842275	||	0	-0.000372587	0.999047	9.58839	0.998851
Sh3kbp1	X:159816577-159828579	12002	2	0	1	|	2	0	0	||	89	177	142	|	103	86	111	||	0	-0.263028	0.934328	9.07299	0.84231	||	0	-0.274572	0.879216	9.07299	0.291444
App	16:85013627-85030365	16738	2	0	1	|	2	0	0	||	87	85	109	|	115	138	147	||	0	-0.26261	0.934328	9.05976	0.842372	||	0	0.654561	0.23395	9.05976	0.0101327
Arf3	15:98740421-98742829	2408	2	0	1	|	2	0	0	||	23	31	33	|	19	23	37	||	0	-0.261061	0.934328	7.31322	0.842604	||	0	-0.0205975	0.988023	7.31322	0.944624
Acbd5	2:23089591-23090582	991	1	0	2	|	1	0	1	||	39	55	59	|	39	43	54	||	0	-0.259655	0.934328	7.98491	0.843058	||	0	-0.0308128	0.985324	7.98491	0.899426
Prex1	2:166638315-166647045	8730	0	1	1	|	2	0	0	||	71	61	78	|	73	36	77	||	0	0.286772	0.934328	8.35853	0.843379	||	0	-0.0673262	0.975877	8.35853	0.819773
Ubap2	4:41226280-41229848	3568	1	1	0	|	2	0	0	||	31	48	52	|	18	50	60	||	0	0.28987	0.934328	7.82505	0.843745	||	0	0.0948	0.971579	7.82505	0.805303
Cox8a	19:7215166-7215338	172	1	0	2	|	1	1	0	||	1851	595	662	|	1730	400	726	||	0	-0.289215	0.934328	11.7587	0.844173	||	0	-0.0328917	0.989186	11.7587	0.960399
Ankrd11	8:122908668-122974792	66124	3	0	0	|	2	0	0	||	67	90	93	|	71	68	89	||	0	-0.25253	0.936288	8.59932	0.847273	||	0	0.00779636	0.991451	8.59932	0.971657
Ddhd1	14:45616530-45629753	13223	3	0	0	|	2	0	0	||	51	63	79	|	54	63	104	||	0	-0.251511	0.936288	8.41265	0.848278	||	0	0.307115	0.809639	8.41265	0.205144
Fbxo42	4:141167713-141170940	3227	3	0	0	|	2	0	0	||	68	70	84	|	65	60	119	||	0	-0.251463	0.936288	8.55674	0.848325	||	0	0.230017	0.903967	8.55674	0.334811
Fam120a	13:48945942-48949303	3361	3	0	0	|	2	0	0	||	135	176	195	|	129	120	208	||	0	-0.250659	0.936288	9.44582	0.849119	||	0	-0.0315573	0.985175	9.44582	0.892275
Cops2	2:125833724-125836239	2515	2	1	0	|	1	1	0	||	229	192	218	|	284	230	304	||	0	-0.249868	0.936288	9.99255	0.850657	||	0	0.481911	0.606167	9.99255	0.0767339
Lmbr1	5:29346767-29365206	18439	4	3	0	|	3	1	1	||	42	54	50	|	60	39	72	||	0	-0.161619	0.936288	8.20863	0.851254	||	0	0.349508	0.757679	8.20863	0.154508
Atp8a1	5:67764864-67769163	4299	3	0	0	|	2	0	0	||	168	244	274	|	146	167	309	||	0	-0.24848	0.936288	9.80916	0.851283	||	0	-0.0383811	0.983222	9.80916	0.88503
Kif11	19:37387017-37398207	11190	0	2	0	|	2	0	0	||	465	733	596	|	349	371	787	||	0	0.27255	0.936288	10.9287	0.85173	||	0	-0.167037	0.944221	10.9287	0.576237
Tax1bp1	6:52757554-52758355	801	3	0	0	|	2	0	0	||	411	618	503	|	353	435	582	||	0	-0.247898	0.936288	10.7967	0.851863	||	0	-0.0252059	0.987924	10.7967	0.925187
Samhd1	2:157120482-157126844	6362	3	0	0	|	2	0	0	||	331	482	437	|	294	214	257	||	0	-0.24747	0.936288	10.3554	0.852291	||	0	-0.535044	0.527611	10.3554	0.0549542
Kif4	X:100664736-100669970	5234	3	0	0	|	2	0	0	||	106	199	146	|	108	133	252	||	0	-0.247416	0.936288	9.40905	0.852345	||	0	0.230635	0.944221	9.40905	0.421432
Knstrn	2:118823420-118823786	366	3	0	0	|	2	0	0	||	270	294	239	|	188	116	275	||	0	-0.24732	0.936288	9.88588	0.852441	||	0	-0.391909	0.764529	9.88588	0.16766
Gpatch2l	12:86256868-86269061	12193	3	0	0	|	2	0	0	||	48	31	66	|	43	38	58	||	0	-0.246726	0.936288	7.96708	0.853035	||	0	0.0508123	0.982691	7.96708	0.877323
Rasgef1b	5:99240823-99243246	2423	1	0	0	|	0	0	1	||	18	11	13	|	28	22	10	||	0	0.383614	0.936288	6.75242	0.853131	||	0	0.701535	0.831291	6.75242	0.220584
Ndufs1	1:63148396-63148571	175	4	2	1	|	3	2	0	||	150	162	163	|	186	145	182	||	0	-0.16136	0.936427	9.57882	0.853806	||	0	0.257229	0.886802	9.57882	0.309214
Vps13b	15:35572060-35597522	25462	3	0	0	|	2	0	0	||	135	279	220	|	89	145	231	||	0	-0.245113	0.936427	9.58834	0.854657	||	0	-0.326523	0.885687	9.58834	0.307854
Cstf3	2:104608871-104609186	315	4	2	1	|	3	0	2	||	44	44	34	|	40	32	34	||	0	-0.161047	0.936427	7.84399	0.855112	||	0	-0.058	0.982691	7.84399	0.855335
Stx2	5:128988802-128999587	10785	4	1	2	|	3	2	0	||	134	108	134	|	101	97	170	||	0	-0.159008	0.936427	9.22153	0.855811	||	0	0.055732	0.975877	9.22153	0.827911
Hist1h1c	13:23739308-23739466	158	5	2	3	|	3	0	4	||	6657	4597	4075	|	7085	3361	4561	||	0	-0.160923	0.936427	13.8415	0.857315	||	0	0.0972379	0.982691	13.8415	0.853863
Cdk13	13:17800794-17801457	663	1	2	0	|	3	0	0	||	11	47	38	|	14	27	34	||	0	0.224666	0.936427	7.35426	0.857746	||	0	-0.185193	0.961696	7.35426	0.703985
Slc26a11	11:119368664-119369265	601	1	0	0	|	0	1	0	||	8	4	8	|	6	6	2	||	0	0.368106	0.936427	5.65568	0.857858	||	0	-0.330348	0.949762	5.65568	0.604762
Lpp	16:24442781-24456942	14161	1	0	0	|	0	1	0	||	26	46	24	|	24	8	11	||	0	0.36786	0.936427	7.05227	0.857932	||	0	-0.963395	0.534647	7.05227	0.0574822
Mipep	14:60843208-60875307	32099	2	0	1	|	1	1	0	||	36	25	20	|	38	21	33	||	0	-0.240528	0.936427	7.39484	0.858326	||	0	0.290828	0.944221	7.39484	0.472685
Zzz3	3:152420015-152428832	8817	3	2	3	|	2	3	2	||	42	62	54	|	33	56	46	||	0	0.14013	0.936427	8.17972	0.859276	||	0	-0.0588615	0.982691	8.17972	0.844211
Hectd4	5:121266235-121277833	11598	3	0	0	|	2	0	0	||	129	238	238	|	103	200	447	||	0	-0.239385	0.936427	9.83143	0.860491	||	0	0.373015	0.911796	9.83143	0.350921
Phtf2	5:20789629-20794481	4852	3	0	0	|	1	1	0	||	18	30	30	|	22	22	21	||	0	-0.232175	0.936427	7.15627	0.86087	||	0	-0.0978761	0.965408	7.15627	0.777573
Gsr	8:33669153-33682679	13526	3	0	0	|	2	0	0	||	221	115	218	|	344	140	336	||	0	-0.238546	0.936427	9.9111	0.861358	||	0	0.645408	0.704264	9.9111	0.117784
Tns3	11:8518199-8519570	1371	7	1	6	|	10	1	0	||	50	47	45	|	59	22	45	||	0	-0.118562	0.936427	8.24084	0.862006	||	0	-0.0467076	0.985671	8.24084	0.90314
Mtm1	X:71231391-71259826	28435	1	0	0	|	0	0	1	||	26	23	22	|	35	44	26	||	0	0.353082	0.936427	7.3797	0.862369	||	0	0.74329	0.606167	7.3797	0.0762583
Rasa2	9:96576286-96611499	35213	2	1	0	|	0	0	2	||	35	25	30	|	26	20	26	||	0	-0.228731	0.936427	7.31084	0.863415	||	0	-0.198726	0.944221	7.31084	0.575569
Slc41a3	6:90633611-90635396	1785	0	0	2	|	2	0	0	||	32	22	32	|	29	42	24	||	0	0.251974	0.936427	7.44622	0.86481	||	0	0.321106	0.944221	7.44622	0.465661
Mllt3	4:87840682-87841389	707	3	0	0	|	0	1	1	||	20	29	26	|	29	25	28	||	0	-0.224239	0.936427	7.27057	0.864938	||	0	0.2772	0.934146	7.27057	0.383463
Prim2	1:33512016-33533363	21347	6	3	0	|	6	0	2	||	333	192	232	|	258	143	316	||	0	0.133078	0.936427	10.0859	0.867159	||	0	-0.0201713	0.989186	10.0859	0.956329
Lonp2	8:86665691-86673069	7378	1	0	0	|	0	1	0	||	82	85	96	|	87	53	67	||	0	0.335563	0.936427	8.5537	0.867867	||	0	-0.190957	0.944221	8.5537	0.501826
Cdkn3	14:46762528-46768897	6369	12	3	6	|	7	3	5	||	337	217	180	|	210	66	208	||	0	-0.10655	0.936427	10.0318	0.868968	||	0	-0.547633	0.787186	10.0318	0.191618
Ipo7	7:110027071-110031766	4695	5	2	0	|	3	2	0	||	251	247	269	|	250	156	233	||	0	-0.145968	0.936427	9.98941	0.869176	||	0	-0.12834	0.955694	9.98941	0.646549
Trim37	11:87184884-87186515	1631	2	0	1	|	0	1	1	||	44	44	101	|	67	60	112	||	0	-0.219724	0.936427	8.4562	0.869369	||	0	0.449876	0.773293	8.4562	0.177449
Optn	2:5052988-5054716	1728	6	0	0	|	2	2	1	||	109	106	127	|	70	66	219	||	0	0.153422	0.936427	9.09257	0.870783	||	0	0.0688206	0.982691	9.09257	0.846029
Pmm2	16:8645369-8646264	895	3	0	0	|	0	0	2	||	135	111	110	|	128	100	138	||	0	-0.215141	0.936427	9.12735	0.870906	||	0	0.157616	0.944221	9.12735	0.564003
Foxn2	17:88462713-88463263	550	5	2	0	|	2	2	1	||	66	64	59	|	50	49	57	||	0	-0.140612	0.936427	8.3198	0.870978	||	0	-0.144213	0.944221	8.3198	0.570056
Golph3	15:12339628-12349788	10160	0	0	1	|	0	0	1	||	138	135	119	|	164	119	152	||	0	0.320035	0.936427	9.26942	0.873831	||	0	0.288045	0.880478	9.26942	0.294547
Agap1	1:89663661-89671271	7610	1	0	0	|	1	0	0	||	41	71	54	|	39	31	63	||	0	0.318937	0.936427	7.95805	0.873841	||	0	-0.201486	0.944221	7.95805	0.442443
Med15	16:17683159-17697694	14535	0	0	1	|	0	0	1	||	75	86	69	|	82	35	91	||	0	0.320216	0.936427	8.44896	0.873929	||	0	-0.0438261	0.983222	8.44896	0.88652
Bdp1	13:100078659-100084195	5536	1	0	0	|	1	0	0	||	61	103	71	|	35	49	60	||	0	0.318948	0.936427	8.25839	0.873938	||	0	-0.564725	0.411563	8.25839	0.0328895
Ccz1	5:144001377-144009286	7909	1	0	0	|	1	0	0	||	125	130	126	|	151	112	146	||	0	0.318961	0.936427	9.20443	0.874049	||	0	0.242952	0.903988	9.20443	0.338564
Zdhhc9	X:48191221-48194720	3499	1	0	0	|	1	0	0	||	20	37	32	|	16	10	11	||	0	0.319017	0.936427	6.93086	0.874545	||	0	-1.08463	0.181469	6.93086	0.00645693
Uqcrfs1	13:30540650-30540709	59	0	0	1	|	0	0	1	||	236	141	161	|	392	221	230	||	0	0.321739	0.936427	9.94013	0.874723	||	0	0.791414	0.51896	9.94013	0.053028
Arhgap35	7:16511193-16512485	1292	1	0	0	|	1	0	0	||	15	24	16	|	19	8	17	||	0	0.319039	0.936427	6.66611	0.874737	||	0	-0.184497	0.957987	6.66611	0.661889
Psd3	8:67741761-67758265	16504	1	0	0	|	1	0	0	||	28	37	24	|	29	14	22	||	0	0.319039	0.936427	7.17929	0.874742	||	0	-0.306714	0.944221	7.17929	0.429583
Matr3	18:35584515-35584881	366	1	0	0	|	1	0	0	||	355	529	425	|	409	605	487	||	0	0.31904	0.936427	10.7763	0.874751	||	0	0.388447	0.833137	10.7763	0.222527
Styx	14:45354946-45366659	11713	1	0	0	|	1	0	0	||	24	31	42	|	33	21	20	||	0	0.319057	0.936427	7.30927	0.874899	||	0	-0.204348	0.949762	7.30927	0.603774
R3hdm2	10:127390311-127400193	9882	1	0	0	|	1	0	0	||	12	33	23	|	13	9	22	||	0	0.319059	0.936427	6.78102	0.874918	||	0	-0.495957	0.856165	6.78102	0.245587
Smg6	11:74981852-74990215	8363	1	0	0	|	1	0	0	||	34	88	89	|	35	56	104	||	0	0.319065	0.936427	8.3205	0.874971	||	0	0.00154037	0.998257	8.3205	0.996615
Amotl1	9:14571623-14575439	3816	1	0	0	|	1	0	0	||	16	12	16	|	7	14	11	||	0	0.319069	0.936427	6.39653	0.875002	||	0	-0.316806	0.944221	6.39653	0.498233
Setd2	9:110573612-110574274	662	4	2	1	|	2	2	2	||	62	149	158	|	68	127	169	||	0	0.137477	0.936427	9.19772	0.87513	||	0	0.129912	0.961696	9.19772	0.709721
Nlrp5-ps	7:14578736-14609339	30603	0	0	1	|	0	0	1	||	2	0	0	|	0	0	2	||	0	0.323403	0.936427	4.65012	0.875538	||	0	0.0330664	0.98992	4.65012	0.966583
Dcaf6	1:165336745-165357546	20801	0	0	1	|	0	1	0	||	82	144	30	|	61	80	173	||	0	0.321579	0.936427	8.75862	0.875844	||	0	0.353797	0.944221	8.75862	0.470988
Creb3l2	6:37353557-37364143	10586	1	0	0	|	1	0	0	||	14	8	22	|	13	12	9	||	0	0.319171	0.936427	6.42813	0.875926	||	0	-0.202128	0.961696	6.42813	0.698908
Vps13b	15:35792039-35794489	2450	3	0	0	|	0	2	0	||	51	112	97	|	44	71	102	||	0	-0.206891	0.936427	8.57479	0.87636	||	0	-0.12373	0.961696	8.57479	0.688648
Prpf6	2:181631435-181632087	652	0	1	0	|	1	0	0	||	83	78	90	|	89	75	123	||	0	0.308303	0.937446	8.7149	0.877827	||	0	0.303759	0.773293	8.7149	0.178952
Fer	17:64029290-64037664	8374	0	0	1	|	1	0	0	||	21	28	29	|	23	16	22	||	0	0.306801	0.937724	7.0565	0.878602	||	0	-0.211767	0.944221	7.0565	0.51684
Gm28437	1:24613561-24613622	61	0	1	0	|	0	0	1	||	6614	6078	6453	|	6724	6810	6517	||	0	0.312967	0.937724	14.1618	0.879117	||	0	0.22524	0.955694	14.1618	0.638311
Osmr	15:6836916-6842917	6001	1	0	0	|	1	0	0	||	34	8	8	|	28	21	7	||	0	0.319723	0.939379	6.81256	0.881183	||	0	0.30696	0.961696	6.81256	0.694873
Lrch3	16:32950292-32961744	11452	15	6	4	|	13	3	5	||	59	74	63	|	48	39	48	||	0	0.0706479	0.939998	8.80158	0.882279	||	0	-0.392869	0.717264	8.80158	0.127802
Ikzf1	11:11700205-11761353	61148	6	0	1	|	3	0	2	||	311	415	383	|	216	149	295	||	0	-0.128664	0.940279	10.231	0.883493	||	0	-0.636252	0.257316	10.231	0.0126965
Hace1	10:45648591-45652738	4147	3	0	0	|	0	2	0	||	113	153	135	|	105	126	324	||	0	-0.195791	0.940279	9.41836	0.883573	||	0	0.514695	0.702768	9.41836	0.11366
Senp5	16:31983264-31983873	609	0	1	0	|	1	0	0	||	21	47	36	|	35	31	27	||	0	0.291379	0.94148	7.47767	0.885219	||	0	0.0347144	0.987924	7.47767	0.925036
Galnt18	7:111597803-111599123	1320	1	0	2	|	0	2	0	||	15	4	4	|	8	7	5	||	0	-0.205713	0.941633	5.96821	0.885878	||	0	-0.093206	0.985324	5.96821	0.895868
Elovl5	9:77957141-77961053	3912	0	1	0	|	1	0	0	||	66	61	69	|	90	59	44	||	0	0.283781	0.94379	8.34563	0.88851	||	0	0.170763	0.955694	8.34563	0.649766
Smoc1	12:81104607-81106011	1404	0	1	0	|	1	0	0	||	4	5	8	|	4	2	2	||	0	0.282782	0.94379	5.40763	0.888942	||	0	-0.883727	0.773293	5.40763	0.179273
Fat3	9:16374949-16378254	3305	1	2	0	|	2	0	1	||	11	12	8	|	24	2	3	||	0	0.193741	0.944397	6.29424	0.890032	||	0	0.118941	0.983222	6.29424	0.884872
Hist1h1c	13:23739296-23739355	59	6	3	0	|	6	0	2	||	7134	6357	6200	|	7478	4411	6585	||	0	0.117498	0.946854	14.1238	0.892867	||	0	0.0358028	0.988023	14.1151	0.940898
Etv6	6:134062032-134066465	4433	6	1	1	|	6	0	0	||	47	41	32	|	31	23	27	||	0	-0.111326	0.947266	7.7293	0.894257	||	0	-0.433266	0.850526	7.7293	0.231043
AB124611	9:21535908-21540623	4715	2	0	1	|	0	0	2	||	276	188	178	|	287	110	149	||	0	-0.182639	0.947266	9.75874	0.894294	||	0	-0.0926023	0.979472	9.75874	0.835022
Fam117a	11:95354455-95355854	1399	2	1	0	|	0	2	0	||	21	79	70	|	18	55	90	||	0	-0.180043	0.949665	8.11814	0.897079	||	0	0.0631753	0.985324	8.11814	0.901047
Picalm	7:90160448-90177603	17155	8	3	2	|	7	3	1	||	687	825	776	|	741	603	1062	||	0	0.0807001	0.954652	11.4697	0.902313	||	0	0.181826	0.944221	11.4697	0.513355
Pcmtd1	1:7120194-7120615	421	5	3	1	|	6	1	0	||	36	47	39	|	37	22	16	||	0	-0.0993814	0.95476	7.7489	0.903177	||	0	-0.499246	0.840958	7.7489	0.226376
Ankib1	5:3755594-3772787	17193	0	3	1	|	2	1	0	||	59	69	66	|	56	41	39	||	0	-0.136978	0.95476	8.19497	0.903463	||	0	-0.340697	0.875363	8.19497	0.265585
Top2a	11:99000768-99001441	673	1	2	1	|	2	0	1	||	684	1267	1078	|	599	548	1393	||	0	-0.135734	0.957218	11.5716	0.906313	||	0	-0.175745	0.949762	11.5716	0.610353
Diaph3	14:86852072-86866642	14570	4	0	3	|	4	0	2	||	135	225	201	|	149	131	307	||	0	0.0986328	0.957663	9.71948	0.907259	||	0	0.154356	0.944221	9.71948	0.573924
Cwf19l2	9:3475483-3477962	2479	7	0	0	|	2	2	1	||	32	41	48	|	37	50	46	||	0	-0.100776	0.958472	7.96118	0.908552	||	0	0.295995	0.901905	7.96118	0.329431
Ppp1cc	5:122168175-122169149	974	2	1	1	|	3	0	0	||	393	399	402	|	516	237	391	||	0	-0.130071	0.95935	10.5711	0.90991	||	0	0.0804869	0.972297	10.5711	0.810975
Lmnb1	18:56728401-56733337	4936	2	1	1	|	3	0	0	||	225	385	347	|	194	107	363	||	0	-0.127454	0.9604	10.0683	0.911432	||	0	-0.454835	0.764529	10.0683	0.165994
Rnf114	2:167507047-167511326	4279	5	1	0	|	3	0	2	||	133	105	73	|	118	77	75	||	0	0.105488	0.960603	8.94973	0.912152	||	0	-0.0553625	0.983222	8.94973	0.887136
Nsd2	5:33843112-33846267	3155	31	8	10	|	17	11	10	||	153	234	237	|	138	154	333	||	0	0.0455031	0.960959	10.4611	0.913447	||	0	0.086435	0.961696	10.4611	0.75844
Malat1	19:5800854-5800910	56	2	14	11	|	2	8	11	||	1945	6253	5450	|	1863	5198	5013	||	0	-0.0952276	0.960959	13.6182	0.913879	||	0	0.0202467	0.993747	13.6182	0.979037
C2cd5	6:143029573-143030876	1303	7	0	0	|	3	1	1	||	61	96	103	|	64	111	189	||	0	-0.0965296	0.960959	8.98819	0.91429	||	0	0.583198	0.598665	8.98819	0.0722496
Bub1b	2:118631759-118635277	3518	37	8	0	|	21	10	3	||	225	213	251	|	178	151	309	||	0	0.0596704	0.960959	10.4322	0.914828	||	0	-0.0339813	0.988023	10.4322	0.939474
Gypc	18:32528832-32532784	3952	0	2	2	|	1	0	2	||	195	242	246	|	182	164	433	||	0	-0.120602	0.960959	9.96404	0.915386	||	0	0.245017	0.941614	9.96404	0.404417
Stk4	2:164096739-164100596	3857	9	4	1	|	10	0	1	||	247	452	364	|	216	210	267	||	0	-0.0684927	0.960959	10.3202	0.915651	||	0	-0.452584	0.691086	10.3202	0.105701
Uhrf1	17:56317991-56318384	393	10	1	0	|	7	1	1	||	311	354	376	|	271	256	647	||	0	0.0727774	0.965131	10.5382	0.920155	||	0	0.225405	0.944221	10.5382	0.477155
Eri3	4:117582600-117615241	32641	1	1	2	|	2	0	1	||	62	56	66	|	68	50	71	||	0	-0.104495	0.969313	8.34079	0.92535	||	0	0.16656	0.944221	8.34079	0.509449
Zranb1	7:132966507-132973623	7116	1	0	3	|	2	0	1	||	95	119	126	|	99	127	173	||	0	-0.103744	0.969313	9.16191	0.925989	||	0	0.355933	0.731098	9.16191	0.133214
Prom1	5:44044317-44047618	3301	3	0	1	|	3	0	0	||	19	21	37	|	36	12	59	||	0	-0.107036	0.969313	7.45663	0.927677	||	0	0.534395	0.864034	7.45663	0.252636
Rb1	14:73262529-73265632	3103	2	1	1	|	2	1	0	||	189	362	321	|	178	249	555	||	0	-0.103247	0.969313	10.2363	0.928309	||	0	0.248752	0.944221	10.2363	0.457095
Tmod3	9:75529369-75532592	3223	3	1	0	|	3	0	0	||	176	210	150	|	150	167	131	||	0	-0.102488	0.969313	9.5307	0.928366	||	0	-0.0775101	0.971649	9.5307	0.806511
Dennd5a	7:109911915-109927014	15099	2	2	0	|	2	0	1	||	92	135	156	|	94	158	202	||	0	-0.101621	0.969313	9.30771	0.928419	||	0	0.379431	0.787186	9.30771	0.19035
Tssc1	12:28859252-28867153	7901	2	1	1	|	2	0	1	||	120	76	83	|	132	62	130	||	0	-0.103102	0.969313	8.93011	0.928531	||	0	0.298795	0.938223	8.93011	0.398229
Cep350	1:155953154-155962560	9406	8	2	2	|	4	4	1	||	47	79	102	|	68	65	95	||	0	-0.0602502	0.969313	8.75357	0.929122	||	0	0.145909	0.944221	8.75357	0.579673
Ppm1b	17:85003266-85005566	2300	5	1	0	|	3	1	1	||	149	167	200	|	141	144	237	||	0	0.0796798	0.969313	9.60143	0.929613	||	0	0.126309	0.947086	9.60143	0.594436
Ccne1	7:38102786-38103194	408	3	0	1	|	3	0	0	||	334	257	274	|	314	200	490	||	0	-0.0987839	0.969313	10.2783	0.930974	||	0	0.26826	0.934366	10.2783	0.390609
Atxn1	13:45852328-45956575	104247	3	1	0	|	3	0	0	||	39	40	44	|	34	24	36	||	0	-0.0950508	0.969313	7.67754	0.932071	||	0	-0.257934	0.917571	7.67754	0.363205
Ankrd17	5:90298540-90304065	5525	3	1	0	|	3	0	0	||	66	112	108	|	83	80	140	||	0	-0.094943	0.969313	8.865	0.932126	||	0	0.20611	0.934146	8.865	0.381902
Fam126a	5:23980487-23986814	6327	3	1	0	|	3	0	0	||	101	121	134	|	101	111	170	||	0	-0.0947801	0.969313	9.15105	0.93221	||	0	0.218813	0.903967	9.15105	0.335825
Zcchc7	4:44893533-44895989	2456	2	0	2	|	2	1	0	||	91	102	71	|	80	80	66	||	0	-0.0961349	0.969313	8.68428	0.93238	||	0	-0.0541176	0.982691	8.68428	0.860565
Phip	9:82945758-82959851	14093	2	1	1	|	2	0	1	||	96	174	148	|	83	85	126	||	0	-0.0944616	0.969313	9.09561	0.932524	||	0	-0.366273	0.704264	9.09561	0.119628
Ppp2r5c	12:110544075-110554896	10821	2	0	2	|	2	1	0	||	290	286	267	|	315	209	317	||	0	-0.0954379	0.969313	10.173	0.932645	||	0	0.12224	0.957698	10.173	0.656354
Clint1	11:45883710-45895129	11419	1	0	3	|	1	0	2	||	115	118	114	|	151	82	118	||	0	-0.0941693	0.969528	9.11168	0.933782	||	0	0.161889	0.947086	9.11168	0.591636
Cbfb	8:105178593-105202578	23985	4	1	3	|	7	0	0	||	103	151	143	|	109	68	73	||	0	0.0666446	0.969528	9.0907	0.933915	||	0	-0.47856	0.717264	9.0907	0.12754
Ap3s1	18:46754371-46758114	3743	4	1	1	|	3	1	1	||	189	97	123	|	224	110	140	||	0	0.0782994	0.970736	9.46187	0.935611	||	0	0.335091	0.944221	9.46187	0.419701
Dcp2	18:44405210-44405760	550	7	1	0	|	3	2	1	||	59	70	78	|	59	40	65	||	0	-0.062935	0.971951	8.41759	0.937314	||	0	-0.204127	0.937882	8.41759	0.396955
Ahctf1	1:179784090-179786131	2041	3	1	0	|	2	1	0	||	78	110	101	|	81	101	125	||	0	-0.0845788	0.972146	8.89852	0.939404	||	0	0.226107	0.895009	8.89852	0.323279
H6pd	4:149994469-149996381	1912	5	0	5	|	7	1	0	||	31	20	33	|	38	19	40	||	0	-0.0579446	0.972146	7.68851	0.939716	||	0	0.307081	0.944221	7.68851	0.431395
Hbs1l	10:21299178-21307779	8601	3	1	0	|	2	0	1	||	106	120	140	|	92	108	148	||	0	-0.0841588	0.972146	9.11512	0.939754	||	0	0.0522051	0.975877	9.11512	0.81888
Ptk2b	14:66187443-66190234	2791	3	1	0	|	2	1	0	||	49	83	81	|	36	22	55	||	0	-0.0836567	0.972146	8.131	0.940328	||	0	-0.795457	0.132893	8.131	0.00391391
Fam208a	14:27438599-27442620	4021	5	0	4	|	6	1	0	||	72	112	104	|	61	73	80	||	0	-0.0559735	0.972146	8.7993	0.941218	||	0	-0.27093	0.878017	8.7993	0.275371
Tm9sf4	2:153187263-153189077	1814	3	0	1	|	2	0	1	||	78	68	86	|	70	55	73	||	0	-0.0816889	0.972146	8.50862	0.941647	||	0	-0.0973514	0.961696	8.50862	0.702389
Akap7	10:25283893-25289730	5837	3	0	1	|	2	0	1	||	54	91	92	|	52	45	106	||	0	-0.0807495	0.972146	8.49507	0.942487	||	0	-0.123763	0.955694	8.49507	0.642928
Ep400	5:110753804-110756766	2962	4	1	3	|	1	3	2	||	50	72	56	|	36	60	94	||	0	-0.0584941	0.972146	8.40515	0.942847	||	0	0.197364	0.944221	8.40515	0.488089
Ep300	15:81600908-81601545	637	4	0	0	|	3	0	0	||	96	172	168	|	81	85	190	||	0	-0.0794896	0.972146	9.20277	0.943907	||	0	-0.198647	0.944221	9.20277	0.493662
Pphln1	15:93424014-93441712	17698	4	0	0	|	3	0	0	||	55	39	48	|	43	39	41	||	0	-0.0792694	0.972146	7.93298	0.944113	||	0	-0.0727548	0.975877	7.93298	0.823698
Ddx17	15:79541034-79543856	2822	3	0	1	|	2	1	0	||	340	526	615	|	319	354	464	||	0	-0.0787277	0.972146	10.6793	0.944363	||	0	-0.228024	0.940307	10.6793	0.401208
Tacc1	8:25159645-25177994	18349	2	3	2	|	4	2	0	||	48	109	98	|	71	91	137	||	0	0.0585756	0.972146	8.8713	0.944676	||	0	0.369088	0.79892	8.8713	0.198734
Mindy3	2:12396179-12410080	13901	10	2	1	|	8	0	2	||	61	48	34	|	40	38	36	||	0	-0.0480682	0.972146	8.1732	0.945096	||	0	-0.191452	0.949762	8.1732	0.610691
Spred2	11:19998120-20008477	10357	1	2	2	|	3	0	1	||	16	17	13	|	17	6	12	||	0	-0.0697577	0.972146	6.64882	0.946225	||	0	-0.258868	0.944221	6.64882	0.579437
Zcchc17	4:130327193-130329674	2481	2	1	1	|	1	0	2	||	152	126	109	|	137	74	106	||	0	-0.0766803	0.972146	9.12338	0.946423	||	0	-0.159198	0.955694	9.12338	0.629901
Rabgap1l	1:160700712-160702460	1748	20	4	2	|	10	3	7	||	170	223	223	|	131	184	256	||	0	0.0344837	0.972146	10.0675	0.946427	||	0	0.0118456	0.98992	10.0675	0.966305
Wwc2	8:47899436-47900856	1420	3	0	1	|	2	0	1	||	12	15	15	|	15	6	11	||	0	-0.0753808	0.972146	6.49917	0.947233	||	0	-0.248038	0.944221	6.49917	0.579559
Lin54	5:100475689-100485855	10166	7	3	3	|	4	2	4	||	65	78	62	|	64	62	91	||	0	-0.0412753	0.972146	8.70953	0.948102	||	0	0.20305	0.927982	8.70953	0.372319
Cep83	10:94748941-94750659	1718	4	1	1	|	4	0	1	||	48	57	47	|	39	46	54	||	0	0.0580409	0.972146	8.0965	0.948142	||	0	0.00388706	0.996472	8.0965	0.987705
Ncoa2	1:13221307-13224713	3406	7	1	1	|	7	0	0	||	52	76	85	|	66	47	64	||	0	-0.0496255	0.972146	8.50378	0.948163	||	0	-0.11136	0.960131	8.50378	0.678103
Senp1	15:98075809-98087133	11324	3	1	0	|	1	2	0	||	102	126	122	|	76	45	108	||	0	-0.0713749	0.972474	8.84203	0.949016	||	0	-0.510646	0.466873	8.84203	0.0418227
Zfp426	9:20473028-20476478	3450	5	1	0	|	5	0	0	||	32	34	35	|	28	26	31	||	0	0.0559719	0.973217	7.5782	0.950323	||	0	-0.112314	0.961696	7.5782	0.70611
Atxn3	12:101942117-101948439	6322	2	1	3	|	2	3	0	||	60	78	111	|	73	84	79	||	0	0.0554315	0.973217	8.71342	0.951489	||	0	0.0985014	0.961696	8.71342	0.731548
Strn3	12:51661151-51661713	562	3	0	1	|	1	1	1	||	158	156	132	|	97	99	150	||	0	-0.0679643	0.973217	9.24381	0.951492	||	0	-0.262522	0.878017	9.24381	0.289303
Tm9sf3	19:41238678-41256340	17662	2	2	0	|	0	3	0	||	188	240	216	|	236	229	240	||	0	-0.0676087	0.973217	9.91511	0.95203	||	0	0.296151	0.872095	9.91511	0.263923
Specc1	11:62146306-62161910	15604	14	7	7	|	15	6	2	||	71	185	116	|	78	144	268	||	0	-0.0327174	0.973217	9.77651	0.952742	||	0	0.498895	0.779169	9.77651	0.182568
Slf1	13:77083441-77092411	8970	3	0	1	|	1	1	1	||	40	36	42	|	31	47	51	||	0	-0.0660631	0.973217	7.84327	0.952942	||	0	0.255226	0.934366	7.84327	0.391881
Ctage5	12:59144699-59149568	4869	4	0	0	|	2	0	1	||	161	214	201	|	189	221	213	||	0	-0.064187	0.97419	9.76376	0.954428	||	0	0.28395	0.878017	9.76376	0.285043
Stk35	2:129810488-129811237	749	9	1	3	|	6	2	2	||	16	18	17	|	18	12	29	||	0	-0.0345328	0.976831	7.28113	0.957552	||	0	0.310117	0.92876	7.28113	0.375781
Zfp608	18:54946281-54946808	527	4	0	0	|	1	0	2	||	31	54	47	|	12	11	18	||	0	-0.0584023	0.976918	7.38489	0.958173	||	0	-1.53815	0.000259868	7.38489	2.13708e-06
Lockd	6:134956293-134958167	1874	2	2	2	|	2	1	2	||	9	21	13	|	8	12	27	||	0	0.0474645	0.977802	6.77796	0.959745	||	0	0.219934	0.955588	6.77796	0.625069
Esyt2	12:116317830-116324210	6380	8	4	2	|	7	3	1	||	100	113	138	|	96	96	171	||	0	-0.0311853	0.977802	9.31009	0.960111	||	0	0.151925	0.944221	9.31009	0.528585
Tspan33	6:29709941-29719439	9498	4	0	0	|	2	1	0	||	187	130	175	|	187	118	292	||	0	-0.0544761	0.978452	9.62403	0.961771	||	0	0.334174	0.880478	9.62403	0.294401
Arhgap5	12:52516079-52519967	3888	1	2	4	|	4	2	0	||	19	19	18	|	15	22	20	||	0	0.0391122	0.978452	7.09486	0.963194	||	0	0.164522	0.960131	7.09486	0.66827
Ppp4r1	17:65803160-65816050	12890	3	0	1	|	0	0	3	||	29	56	60	|	31	37	48	||	0	-0.0510456	0.978452	7.88435	0.96355	||	0	-0.171885	0.944221	7.88435	0.560735
Arid3a	10:79930635-79932078	1443	4	0	1	|	2	1	1	||	28	61	39	|	17	25	61	||	0	0.046349	0.978452	7.74681	0.964174	||	0	-0.233148	0.944221	7.74681	0.547877
Usp32	11:85017630-85022905	5275	4	0	1	|	2	2	0	||	138	273	259	|	150	218	487	||	0	0.0462004	0.978452	10.0141	0.96432	||	0	0.429785	0.831291	10.0141	0.219759
Atp6v1h	1:5089009-5101123	12114	8	2	2	|	3	3	3	||	113	93	105	|	105	77	81	||	0	-0.0310506	0.978452	9.05002	0.96439	||	0	-0.0906235	0.961696	9.05002	0.762901
Casp8	1:58823915-58833774	9859	7	0	2	|	6	0	1	||	145	199	133	|	150	91	116	||	0	-0.0348772	0.978452	9.4024	0.96484	||	0	-0.25434	0.944221	9.4024	0.423306
not_annotated	5:84123959-84124137	178	162	210	141	|	166	80	196	||	1464	1073	1015	|	1441	619	1403	||	0	0.0246549	0.978452	14.0321	0.965041	||	0	0.0447183	0.988023	14.0321	0.935774
Snrk	9:122131893-122137601	5708	8	1	0	|	1	4	2	||	52	72	75	|	60	43	56	||	0	0.0316488	0.979897	8.4135	0.967004	||	0	-0.169409	0.944221	8.4135	0.523199
Pola1	X:93620505-93626612	6107	13	3	7	|	10	4	4	||	240	310	321	|	222	226	457	||	0	-0.0202752	0.981341	10.4519	0.968967	||	0	0.142537	0.944221	10.4519	0.575153
Milr1	11:106754782-106755051	269	2	0	5	|	6	0	0	||	67	60	57	|	71	31	37	||	0	-0.0335235	0.982484	8.26896	0.970634	||	0	-0.240575	0.944221	8.26896	0.572022
Kat7	11:95289772-95294645	4873	2	1	3	|	4	0	1	||	100	136	147	|	116	140	226	||	0	0.0319571	0.982963	9.38499	0.971646	||	0	0.444125	0.594133	9.38499	0.0710093
Mtmr3	11:4527836-4531305	3469	1	1	3	|	3	0	1	||	274	270	296	|	268	200	414	||	0	-0.0343636	0.983474	10.1966	0.97269	||	0	0.155713	0.944221	10.1966	0.55029
Dock8	19:25051487-25065459	13972	3	0	3	|	5	0	0	||	158	264	195	|	97	84	167	||	0	0.02928	0.984393	9.49104	0.974139	||	0	-0.7154	0.180705	9.49104	0.00614237
Shoc2	19:53987454-53988383	929	6	4	4	|	4	3	4	||	74	89	94	|	98	71	97	||	0	-0.0181759	0.986332	8.98772	0.976599	||	0	0.194487	0.944221	8.98772	0.421239
Rnf214	9:45869179-45869544	365	2	3	1	|	3	0	2	||	18	26	33	|	18	38	41	||	0	0.0247037	0.987825	7.50351	0.978618	||	0	0.471859	0.808824	7.50351	0.20398
Snx5	2:144255340-144255604	264	14	1	3	|	10	0	4	||	469	348	395	|	580	385	327	||	0	0.0131992	0.993185	10.8251	0.984473	||	0	0.265158	0.944221	10.8251	0.535728
Pik3c2a	7:116387844-116391393	3549	5	0	0	|	3	1	0	||	49	70	67	|	30	36	41	||	0	0.0171142	0.994332	8.05499	0.986155	||	0	-0.652223	0.22748	8.05499	0.00972775
Kmt2a	9:44809715-44816659	6944	0	0	5	|	1	2	1	||	29	55	59	|	30	23	41	||	0	-0.0160762	0.994887	7.80017	0.987251	||	0	-0.464222	0.74781	7.80017	0.146364
Pum1	4:130668925-130669298	373	4	1	0	|	4	0	0	||	97	193	272	|	135	141	284	||	0	-0.0125622	0.996348	9.64837	0.99029	||	0	0.111669	0.961696	9.64837	0.746761
Tmem41b	7:109978710-109981117	2407	2	3	0	|	2	2	0	||	63	55	44	|	62	44	51	||	0	-0.0119273	0.996348	8.19544	0.990599	||	0	0.091988	0.965408	8.19544	0.772806
Fxr2	11:69649728-69651723	1995	18	4	1	|	12	1	5	||	47	51	65	|	48	39	76	||	0	0.00604598	0.996348	8.68577	0.99071	||	0	0.105087	0.961696	8.68577	0.711687
Stam	2:14115817-14117535	1718	4	0	1	|	3	1	0	||	67	70	78	|	70	40	74	||	0	0.010414	0.996348	8.43426	0.991622	||	0	-0.10243	0.961696	8.43426	0.689895
Sap130	18:31666341-31667009	668	3	2	0	|	2	2	0	||	17	31	25	|	11	16	29	||	0	0.00873154	0.996348	7.10574	0.993074	||	0	-0.267566	0.944221	7.10574	0.465583
Asxl2	12:3442474-3474613	32139	4	0	1	|	3	0	1	||	39	47	55	|	42	40	66	||	0	0.00838312	0.996348	8.0432	0.993189	||	0	0.188585	0.944221	8.0432	0.430035
Memo1	17:74241905-74245087	3182	3	2	0	|	2	2	0	||	282	282	315	|	386	260	446	||	0	0.00837409	0.996348	10.3738	0.993334	||	0	0.429153	0.684452	10.3738	0.103231
Tbcel	9:42437115-42444588	7473	3	1	1	|	3	0	1	||	79	131	160	|	75	104	227	||	0	-0.00848765	0.996348	9.20347	0.993388	||	0	0.215124	0.944221	9.20347	0.510878
Ehmt1	2:24884146-24884702	556	3	0	2	|	4	0	0	||	57	80	86	|	50	39	73	||	0	-0.00718352	0.996348	8.37454	0.994202	||	0	-0.338506	0.740698	8.37454	0.143305
Rps6ka5	12:100654047-100654489	442	11	1	1	|	6	2	2	||	32	48	26	|	27	29	47	||	0	-0.00431779	0.996348	7.92174	0.9947	||	0	0.072605	0.975877	7.92174	0.820841
Atad2b	12:4937387-4945022	7635	2	2	1	|	2	1	1	||	68	109	122	|	50	70	129	||	0	-0.00668331	0.996348	8.79316	0.994709	||	0	-0.160947	0.944221	8.79316	0.571365
Tfdp2	9:96273839-96290627	16788	3	1	1	|	3	0	1	||	605	788	633	|	609	549	1030	||	0	-0.0058982	0.99645	11.2689	0.995357	||	0	0.207721	0.944221	11.2689	0.454562
Aco1	4:40163719-40167191	3472	2	0	3	|	2	1	1	||	81	38	73	|	81	85	76	||	0	-0.00446373	0.997115	8.58187	0.996568	||	0	0.469317	0.813615	8.58187	0.209202
Fars2	13:36232122-36246494	14372	3	1	1	|	3	1	0	||	80	69	85	|	79	73	83	||	0	-0.00276304	0.997801	8.64987	0.997801	||	0	0.14449	0.944221	8.64987	0.573288

## Sheet: Liver-Circ vs Linear
			Circ Counts							||	Linear Counts							||	Circ Statistics					||	Linear Statistics
Gene	CircCoordinates	CircLength	Liver-WT1-C	Liver-WT2-C	Liver-WT3-C	|	Liver-KO1-C	Liver-KO2-C	Liver-KO3-C	||	Liver-WT1-L	Liver-WT2-L	Liver-WT3-L	|	Liver-KO1-L	Liver-KO2-L	Liver-KO3-L	||	WT-Circ	KO-Circ	FDR	AveExpr	P value	||	WT-Linear	KO-Linear	FDR	AveExpr	P value
Arih1	9:59426123-59454469	28346	0	0	0	|	0	1	19	||	88	74	100	|	93	68	131	||	0	9.04071	0.00650253	8.80339	4.97882e-06	||	0	0.12761	0.998613	8.80339	0.798935
Lepr	4:101789263-101792070	2807	0	0	0	|	5	0	18	||	57	124	67	|	705	1628	772	||	0	9.26238	0.00650253	10.8755	7.3558e-06	||	0	3.6462	0.000118648	10.8755	1.34218e-07
Rnf216	5:143090120-143090929	809	8	3	4	|	0	0	0	||	17	9	18	|	9	12	22	||	0	-8.56886	0.0292112	6.85258	7.17832e-05	||	0	-0.0552545	0.998613	6.85258	0.907896
Bfar	16:13697333-13699075	1742	2	0	0	|	3	4	14	||	119	103	119	|	136	74	57	||	0	3.55192	0.0292112	8.95891	7.36982e-05	||	0	-0.378203	0.998613	8.95891	0.329412
Ghr	15:3457930-3551685	93755	10	3	16	|	1	0	0	||	321	445	635	|	246	99	52	||	0	-4.5002	0.0292112	10.1702	8.26108e-05	||	0	-1.81234	0.166013	10.1702	0.00179084
Cbl	9:44146219-44146263	44	0	0	0	|	2	8	0	||	16	19	13	|	25	28	36	||	0	8.31796	0.042278	7.16471	0.000143477	||	0	0.852464	0.824381	7.16471	0.0634076
Ptpn9	9:57056714-57057861	1147	1	0	0	|	3	2	9	||	37	53	32	|	52	46	46	||	0	3.9808	0.0448797	7.96116	0.000177691	||	0	0.212001	0.998613	7.96116	0.502033
Ube2d2a	18:35793465-35801367	7902	1	9	10	|	0	0	1	||	63	121	82	|	55	98	112	||	0	-4.02081	0.046343	8.77994	0.000209697	||	0	-0.0166594	0.999964	8.77994	0.967938
Rsf1	7:97660813-97664766	3953	0	0	0	|	5	1	3	||	24	24	27	|	28	15	19	||	0	8.08518	0.0488776	7.13108	0.000248811	||	0	-0.292719	0.998613	7.13108	0.414989
Lrig1	6:94654847-94663998	9151	1	0	0	|	2	6	5	||	34	26	32	|	29	25	18	||	0	3.91079	0.0507668	7.44457	0.000287142	||	0	-0.370947	0.958124	7.44457	0.282398
C3	17:57222789-57222856	67	0	0	0	|	1	6	2	||	6223	6064	2849	|	4386	6582	4091	||	0	8.128	0.0539069	13.7287	0.000386028	||	0	-0.0518007	0.998613	13.7287	0.904593
Gfm2	13:97141927-97150413	8486	2	0	9	|	0	0	0	||	57	71	76	|	49	38	56	||	0	-8.08969	0.0539069	8.16597	0.000405194	||	0	-0.527058	0.832304	8.16597	0.0777249
Gab1	8:80800101-80800395	294	0	0	0	|	4	0	5	||	19	18	12	|	15	20	39	||	0	8.05217	0.0539069	7.02042	0.000439489	||	0	0.545913	0.958124	7.02042	0.253944
Pck1	2:173158497-173158562	65	0	1	0	|	3	8	2	||	5468	5283	3900	|	5835	5655	3074	||	0	3.96957	0.0539069	13.6781	0.000443186	||	0	-0.0400293	0.998613	13.6781	0.917895
Nf2	11:4780578-4784563	3985	0	0	0	|	3	0	7	||	45	11	30	|	36	22	14	||	0	8.15107	0.0539069	7.31103	0.000490297	||	0	-0.298176	0.998613	7.31103	0.607497
Cspp1	1:10074860-10082346	7486	3	2	6	|	0	0	0	||	12	16	33	|	17	20	16	||	0	-8.09881	0.0539069	6.9809	0.000492282	||	0	-0.185904	0.998613	6.9809	0.657789
Dnajc5	2:181546371-181547553	1182	0	0	0	|	1	4	3	||	79	71	77	|	102	102	106	||	0	7.91407	0.0539069	8.63193	0.000518336	||	0	0.425377	0.903042	8.63193	0.130122
Tpr	1:150428120-150429545	1425	0	0	0	|	2	1	5	||	78	118	132	|	121	139	165	||	0	7.88997	0.0582879	9.0105	0.000593429	||	0	0.370449	0.911982	9.0105	0.213481
Ghr	15:3457930-3551722	93792	1	5	6	|	0	0	0	||	302	428	599	|	236	96	50	||	0	-8.21891	0.0658506	9.99438	0.00070767	||	0	-1.79165	0.146113	9.99438	0.00132229
Rnf169	7:99955467-99955540	73	4	0	6	|	0	0	0	||	114	69	98	|	83	48	80	||	0	-7.95827	0.0782528	8.55289	0.000885213	||	0	-0.452162	0.911982	8.55289	0.211328
Cyp4a14	4:115491287-115491477	190	0	0	0	|	0	3	5	||	669	544	874	|	3033	2080	1123	||	0	7.87299	0.0811371	11.9545	0.00109667	||	0	1.57281	0.146113	11.9545	0.00130955
Szt2	4:118402403-118402994	591	0	0	0	|	0	0	8	||	8	10	12	|	12	8	17	||	0	7.80697	0.0811371	6.39091	0.00112031	||	0	0.279097	0.998613	6.39091	0.607245
Sik2	9:50995608-50998616	3008	0	0	0	|	0	4	3	||	19	26	26	|	20	20	12	||	0	7.71902	0.0811371	6.96744	0.00119926	||	0	-0.452228	0.93462	6.96744	0.232638
Zfand3	17:30135323-30153368	18045	0	0	0	|	0	0	7	||	44	57	64	|	67	56	53	||	0	7.68027	0.0811371	8.08186	0.00124174	||	0	0.0836719	0.998613	8.08186	0.769475
Dhtkd1	2:5923869-5932542	8673	12	10	19	|	2	1	4	||	170	133	95	|	132	140	41	||	0	-2.29706	0.0811371	9.40707	0.00128178	||	0	-0.381008	0.998613	9.40707	0.424393
Ash1l	3:89043119-89043643	524	0	0	0	|	1	1	5	||	44	54	33	|	53	47	41	||	0	7.69315	0.0811371	7.83872	0.00128399	||	0	0.0760155	0.998613	7.83872	0.816379
Pde5a	3:122747889-122748477	588	0	0	0	|	2	0	6	||	7	4	14	|	6	3	9	||	0	7.83439	0.0811371	6.01708	0.00132589	||	0	-0.463093	0.998613	6.01708	0.477117
Usp3	9:66562554-66566903	4349	3	5	1	|	0	0	0	||	33	18	40	|	40	24	40	||	0	-7.83857	0.0811371	7.49947	0.00136889	||	0	0.17048	0.998613	7.49947	0.655989
Atxn1	13:45852328-45956575	104247	13	9	3	|	1	0	3	||	61	85	57	|	51	26	42	||	0	-2.44042	0.0811371	8.40342	0.00137447	||	0	-0.801771	0.794203	8.40342	0.0426749
Ppp1r12a	10:108268572-108274188	5616	1	1	7	|	0	0	0	||	56	81	99	|	64	64	88	||	0	-7.80311	0.0811371	8.42906	0.00137676	||	0	-0.131208	0.998613	8.42906	0.675785
Vav3	3:109562743-109578364	15621	0	0	0	|	1	0	6	||	9	14	9	|	21	12	24	||	0	7.66572	0.0899208	6.63102	0.00158066	||	0	0.791161	0.861274	6.63102	0.0861792
Ube3a	7:59240967-59247217	6250	25	37	24	|	7	10	6	||	77	73	109	|	80	28	66	||	0	-1.60976	0.0899208	9.73587	0.00162753	||	0	-0.594144	0.911982	9.73587	0.150177
Man1a	10:53977023-54030794	53771	1	4	4	|	0	0	0	||	467	399	327	|	421	248	223	||	0	-7.81711	0.0940737	10.2352	0.0017559	||	0	-0.463718	0.958124	10.2352	0.253307
Gys2	6:142427354-142430385	3031	0	6	3	|	0	0	0	||	280	215	289	|	585	588	277	||	0	-7.82717	0.0986729	10.3131	0.00192808	||	0	0.874886	0.814996	10.3131	0.0528903
Erbb3	10:128578100-128579092	992	0	0	0	|	4	0	3	||	110	122	56	|	165	125	53	||	0	7.71318	0.0986729	8.81626	0.00198363	||	0	0.208542	0.998613	8.81626	0.677581
Kansl1	11:104350487-104378826	28339	2	0	6	|	0	0	0	||	47	61	54	|	70	56	54	||	0	-7.64091	0.0986729	8.1055	0.00227046	||	0	0.133613	0.998613	8.1055	0.640389
Ubp1	9:113944848-113951684	6836	3	5	0	|	0	0	0	||	53	47	38	|	44	31	27	||	0	-7.6724	0.0986729	7.72172	0.00235557	||	0	-0.468587	0.911982	7.72172	0.193371
Uqcc1	2:155901298-155911836	10538	0	0	0	|	2	4	0	||	116	123	138	|	93	70	94	||	0	7.52461	0.0986729	8.7989	0.0024053	||	0	-0.572071	0.814996	8.7989	0.0467356
Ahsg	16:22892179-22892315	136	2	0	0	|	0	5	7	||	7798	7962	7915	|	7802	7886	7941	||	0	2.8051	0.0986729	14.3358	0.00247093	||	0	-0.0255846	0.998613	14.3358	0.896435
Mpp6	6:50143719-50180659	36940	0	0	0	|	3	3	0	||	159	125	174	|	191	140	183	||	0	7.53279	0.0986729	9.30022	0.00251609	||	0	0.141714	0.998613	9.30022	0.657513
Ncor1	11:62433563-62438515	4952	0	0	0	|	0	6	0	||	49	76	61	|	48	64	78	||	0	7.53974	0.0986729	8.19208	0.00252273	||	0	0.0154595	0.999964	8.19208	0.964756
Hnf4a	2:163551577-163559110	7533	0	0	0	|	3	1	3	||	777	329	239	|	698	342	247	||	0	7.71615	0.0986729	10.526	0.00258599	||	0	-0.149373	0.998613	10.526	0.800718
Papola	12:105799651-105820450	20799	0	0	0	|	1	2	3	||	101	116	172	|	103	109	128	||	0	7.49091	0.0986729	8.95012	0.00263307	||	0	-0.194192	0.998613	8.95012	0.504129
Mtr	13:12239649-12247985	8336	0	0	0	|	3	3	0	||	15	24	29	|	20	35	19	||	0	7.54326	0.0986729	7.09581	0.00265091	||	0	0.131496	0.998613	7.09581	0.756311
Adamts13	2:26985423-26987109	1686	3	0	6	|	0	0	0	||	30	16	35	|	44	16	11	||	0	-7.78809	0.0986729	7.2316	0.00266649	||	0	-0.20892	0.998613	7.2316	0.71416
Actb	5:142903212-142903256	44	0	0	0	|	1	0	7	||	794	2466	1859	|	782	2310	4688	||	0	7.76628	0.0986729	12.5216	0.00266837	||	0	0.602866	0.998613	12.5216	0.374596
Slc44a1	4:53481464-53528748	47284	0	0	0	|	0	4	2	||	26	50	57	|	46	43	31	||	0	7.50641	0.0986729	7.72793	0.00267331	||	0	-0.140091	0.998613	7.72793	0.691848
Golph3	15:12339628-12349788	10160	0	0	0	|	0	4	2	||	94	72	132	|	98	65	99	||	0	7.50652	0.0986729	8.64454	0.0026789	||	0	-0.199224	0.998613	8.64454	0.545689
not_annotated	X:128548302-128548367	65	0	0	0	|	2	2	2	||	64	99	68	|	60	114	118	||	0	7.50598	0.100837	8.57477	0.00285005	||	0	0.321009	0.998613	8.57477	0.380865
Eea1	10:95989562-95990465	903	0	0	0	|	0	2	4	||	33	37	60	|	42	24	53	||	0	7.47633	0.100837	7.70174	0.0028809	||	0	-0.136287	0.998613	7.70174	0.702638
Itpr2	6:146144109-146180355	36246	5	0	3	|	0	0	0	||	74	54	57	|	90	44	34	||	0	-7.65335	0.100837	8.15059	0.00295477	||	0	-0.177154	0.998613	8.15059	0.676292
Shank2	7:144285055-144286766	1711	3	0	5	|	0	0	0	||	7	16	21	|	12	8	8	||	0	-7.63595	0.100837	6.45337	0.00296579	||	0	-0.632663	0.911982	6.45337	0.209028
Plrg1	3:83058656-83059927	1271	0	0	0	|	0	2	4	||	77	78	100	|	59	71	139	||	0	7.47221	0.102246	8.56461	0.00310417	||	0	0.0569408	0.998613	8.56461	0.877827
Snx5	2:144255340-144257993	2653	0	0	0	|	1	0	5	||	173	204	278	|	215	176	298	||	0	7.45585	0.102246	9.66703	0.00312288	||	0	0.0631908	0.998613	9.66703	0.852249
Gk	X:85754332-85761407	7075	1	0	0	|	4	0	6	||	495	591	679	|	600	455	681	||	0	3.49217	0.105253	10.861	0.00327428	||	0	-0.0403235	0.998613	10.861	0.912636
Exoc6b	6:84746901-84747784	883	0	1	0	|	2	3	4	||	6	9	10	|	14	19	20	||	0	3.37297	0.124145	6.60285	0.00393218	||	0	1.0529	0.340665	6.60285	0.0103434
R3hdm2	10:127390311-127400193	9882	2	1	4	|	0	0	0	||	23	27	23	|	31	28	26	||	0	-7.45653	0.125099	7.23091	0.00405669	||	0	0.198633	0.998613	7.23091	0.531804
Tec	5:72823456-72825130	1674	3	0	4	|	0	0	0	||	40	41	44	|	39	23	34	||	0	-7.45613	0.125099	7.59656	0.00410393	||	0	-0.40132	0.911982	7.59656	0.183533
Cabin1	10:75684292-75700095	15803	0	0	1	|	1	5	3	||	5	10	10	|	9	14	13	||	0	3.39601	0.129232	6.38564	0.00440676	||	0	0.509258	0.958124	6.38564	0.287014
Acox1	11:116180943-116183624	2681	0	0	0	|	0	2	4	||	1137	1000	529	|	1298	1784	861	||	0	7.45446	0.129232	11.673	0.00440947	||	0	0.522004	0.991275	11.673	0.31305
Glt1d1	5:127644319-127650788	6469	0	0	0	|	0	4	2	||	26	100	107	|	43	168	87	||	0	7.52893	0.129232	8.58524	0.0044588	||	0	0.404473	0.998613	8.58524	0.502679
Paip1	13:119447715-119450010	2295	0	4	3	|	0	0	0	||	190	215	221	|	326	212	196	||	0	-7.45913	0.133043	9.6982	0.00466553	||	0	0.210038	0.998613	9.6982	0.536527
Vrk2	11:26534211-26550075	15864	1	1	5	|	0	0	0	||	17	36	42	|	24	40	56	||	0	-7.44115	0.140128	7.55636	0.0051831	||	0	0.34124	0.998613	7.55636	0.415257
Pik3c2a	7:116387844-116391393	3549	0	7	0	|	0	0	0	||	82	61	69	|	131	68	57	||	0	-7.49209	0.140128	8.45757	0.00522363	||	0	0.235725	0.998613	8.45757	0.606559
Ckap5	2:91546322-91560911	14589	0	0	7	|	0	0	0	||	23	32	37	|	28	52	57	||	0	-7.42629	0.140128	7.63153	0.00522514	||	0	0.569056	0.911982	7.63153	0.15929
Arhgap5	12:52557489-52562427	4938	2	0	5	|	0	0	0	||	153	228	210	|	247	141	117	||	0	-7.44065	0.140128	9.43913	0.00523103	||	0	-0.239602	0.998613	9.43913	0.5353
Xrcc4	13:89991073-89992606	1533	0	2	5	|	0	0	0	||	20	20	56	|	25	36	33	||	0	-7.43931	0.14248	7.41625	0.0053994	||	0	-0.00372609	0.999964	7.41625	0.993164
Sepsecs	5:52665236-52666106	870	0	0	0	|	2	3	0	||	77	103	101	|	72	38	46	||	0	7.26331	0.143732	8.34775	0.00561154	||	0	-0.864266	0.279977	8.34775	0.00775953
Srbd1	17:86098512-86103000	4488	0	0	0	|	1	0	4	||	37	41	39	|	24	16	22	||	0	7.21757	0.143732	7.32275	0.00577358	||	0	-0.930774	0.199585	7.32275	0.00314659
Cct4	11:22995930-22996457	527	0	0	0	|	2	2	1	||	200	188	274	|	243	153	216	||	0	7.25156	0.143732	9.60452	0.00589363	||	0	-0.128902	0.998613	9.60452	0.690624
Zranb1	7:132948026-132950435	2409	0	0	0	|	0	5	0	||	40	52	80	|	69	43	31	||	0	7.28341	0.143732	7.9608	0.0059339	||	0	-0.258781	0.998613	7.9608	0.520951
Anapc5	5:122793437-122794491	1054	0	0	0	|	0	2	3	||	150	186	191	|	169	131	140	||	0	7.2243	0.143732	9.27745	0.00598911	||	0	-0.275226	0.998613	9.27745	0.348548
Kiz	2:146889021-146891284	2263	1	4	6	|	0	0	1	||	19	29	33	|	39	25	31	||	0	-3.16036	0.143732	7.4499	0.00617664	||	0	0.218456	0.998613	7.4499	0.507237
Trip11	12:101883256-101890618	7362	0	0	0	|	2	0	3	||	41	31	76	|	55	45	55	||	0	7.22046	0.143732	7.90946	0.00618323	||	0	0.0685394	0.998613	7.90946	0.84153
Nsd3	8:25640577-25641325	748	0	0	0	|	0	0	5	||	49	50	36	|	41	40	47	||	0	7.20084	0.143732	7.76126	0.00621589	||	0	-0.109479	0.998613	7.76126	0.733233
Hmox2	16:4762559-4763846	1287	0	0	0	|	2	0	3	||	200	223	207	|	137	139	207	||	0	7.21975	0.143732	9.44771	0.00625848	||	0	-0.410289	0.911982	9.44771	0.204484
Specc1l	10:75274017-75279961	5944	0	0	0	|	1	1	3	||	19	11	25	|	14	22	20	||	0	7.22097	0.143732	6.8036	0.00625984	||	0	0.01887	0.999964	6.8036	0.96349
Tdp2	13:24836016-24840558	4542	0	0	0	|	0	0	5	||	38	46	70	|	39	27	47	||	0	7.19738	0.144154	7.76073	0.00635972	||	0	-0.450015	0.911982	7.76073	0.178963
Rad23b	4:55366777-55368124	1347	0	0	0	|	2	0	3	||	183	115	209	|	147	108	179	||	0	7.21786	0.144735	9.24388	0.00646725	||	0	-0.249133	0.998613	9.24388	0.475596
Prkce	17:86488160-86496111	7951	7	4	6	|	2	1	0	||	14	23	17	|	34	19	30	||	0	-2.22136	0.153152	7.40062	0.00697725	||	0	0.591761	0.878632	7.40062	0.102375
Tbk1	10:121552200-121553068	868	0	0	0	|	0	0	5	||	65	40	62	|	51	54	99	||	0	7.18271	0.153152	8.1503	0.00701656	||	0	0.255126	0.998613	8.1503	0.499415
Gm15459	5:5782845-5782901	56	0	0	0	|	0	3	2	||	546	217	419	|	550	402	378	||	0	7.24339	0.155475	10.4389	0.00721934	||	0	0.128787	0.998613	10.4389	0.778967
Dtnb	12:3617606-3686862	69256	0	0	0	|	1	0	4	||	35	19	20	|	29	20	13	||	0	7.19066	0.155475	7.03117	0.00740314	||	0	-0.295077	0.998613	7.03117	0.528741
Lin54	5:100475689-100480321	4632	0	0	0	|	1	2	2	||	5	26	14	|	9	16	15	||	0	7.24118	0.155475	6.52898	0.00745362	||	0	-0.163613	0.998613	6.52898	0.769707
Ccar1	10:62770855-62772065	1210	1	2	3	|	0	0	0	||	44	51	53	|	57	60	52	||	0	-7.23801	0.155475	7.98803	0.00754825	||	0	0.177628	0.998613	7.98803	0.499973
Lepr	4:101764861-101774283	9422	0	0	0	|	0	2	3	||	102	131	92	|	1167	1862	853	||	0	7.21355	0.155475	11.08	0.00763888	||	0	3.56526	4.34741e-09	11.08	2.45894e-12
Atxn1	13:45795509-45956575	161066	4	2	0	|	0	0	0	||	52	87	66	|	34	31	35	||	0	-7.25083	0.155475	7.94618	0.00765063	||	0	-1.04631	0.081888	7.94618	0.000648435
Ccdc125	13:100679317-100687191	7874	0	0	0	|	0	0	5	||	9	27	18	|	17	26	16	||	0	7.16464	0.159627	6.81974	0.00794523	||	0	0.130739	0.998613	6.81974	0.791114
Mbtd1	11:93905159-93912458	7299	0	6	0	|	0	0	0	||	28	45	36	|	34	23	18	||	0	-7.25912	0.164442	7.37542	0.00836339	||	0	-0.549302	0.911982	7.37542	0.177578
Rnf216	5:143080224-143087621	7397	0	0	6	|	0	0	0	||	23	28	31	|	25	39	35	||	0	-7.21958	0.164442	7.35282	0.0083914	||	0	0.262286	0.998613	7.35282	0.457352
Ubxn4	1:128252203-128269971	17768	0	4	2	|	0	0	0	||	146	94	144	|	99	82	153	||	0	-7.24269	0.164442	8.93754	0.00852773	||	0	-0.234577	0.998613	8.93754	0.508105
Fer	17:63921613-63924178	2565	0	2	4	|	0	0	0	||	22	40	59	|	28	30	45	||	0	-7.22802	0.164442	7.57815	0.00866664	||	0	-0.222216	0.998613	7.57815	0.556583
Rras2	7:114058540-114060419	1879	7	7	2	|	1	0	2	||	53	56	78	|	51	61	56	||	0	-2.17176	0.164442	8.32982	0.00871129	||	0	-0.158128	0.998613	8.32982	0.594155
Creb3l2	6:37353557-37364143	10586	0	1	0	|	2	4	2	||	36	17	21	|	37	45	36	||	0	3.22804	0.164442	7.50217	0.00874296	||	0	0.632176	0.889603	7.50217	0.108181
Ehbp1	11:22053432-22068503	15071	4	2	0	|	0	0	0	||	34	25	62	|	51	21	24	||	0	-7.26531	0.165937	7.54815	0.00906201	||	0	-0.332874	0.998613	7.54815	0.46915
Glis3	19:28530873-28531986	1113	0	0	0	|	0	4	1	||	2	5	0	|	7	5	6	||	0	7.30402	0.165937	5.51848	0.00923655	||	0	1.23872	0.911982	5.51848	0.151091
Klf12	14:100100071-100109860	9789	2	0	4	|	0	0	0	||	27	70	94	|	33	45	38	||	0	-7.22477	0.165937	7.93434	0.00923842	||	0	-0.688226	0.861274	7.93434	0.0935502
Prc1	7:80300301-80301159	858	0	0	0	|	0	2	3	||	6	26	34	|	13	49	34	||	0	7.20593	0.165937	7.20454	0.00929398	||	0	0.582878	0.998613	7.20454	0.343387
Mertk	2:128776286-128779872	3586	0	0	1	|	3	1	4	||	85	48	66	|	68	80	113	||	0	3.20195	0.165937	8.46787	0.00932136	||	0	0.352254	0.998613	8.46787	0.323242
Vps13b	15:35445570-35448721	3151	0	0	6	|	0	0	0	||	62	137	127	|	91	76	60	||	0	-7.2086	0.165937	8.62096	0.00938559	||	0	-0.515238	0.911982	8.62096	0.178706
Slc26a11	11:119368664-119369265	601	0	0	0	|	0	2	3	||	14	4	6	|	8	11	3	||	0	7.20507	0.166559	5.97842	0.00951497	||	0	-0.160687	0.998613	5.97842	0.819971
Clpx	9:65316644-65324299	7655	0	3	3	|	0	0	0	||	514	599	834	|	1101	574	624	||	0	-7.23285	0.166737	11.0742	0.00961945	||	0	0.233089	0.998613	11.0742	0.578459
Acbd3	1:180733166-180738637	5471	0	0	6	|	0	0	0	||	14	23	23	|	17	18	36	||	0	-7.20415	0.166773	6.99503	0.00983578	||	0	0.226483	0.998613	6.99503	0.624378
Kmt2a	9:44828784-44829271	487	5	1	0	|	0	0	0	||	7	6	10	|	8	11	4	||	0	-7.27162	0.166773	6.00513	0.00988684	||	0	0.00171195	0.999964	6.00513	0.99809
Osmr	15:6836916-6842917	6001	0	2	4	|	0	0	0	||	25	17	16	|	16	17	42	||	0	-7.22124	0.166773	7.02188	0.00999104	||	0	0.317931	0.998613	7.02188	0.518405
Psma3	12:70990485-70993080	2595	4	0	2	|	0	0	0	||	435	431	600	|	445	297	866	||	0	-7.24385	0.166773	10.6697	0.0100287	||	0	0.107407	0.998613	10.6697	0.816931
Cep350	1:155953154-155962560	9406	7	7	7	|	2	2	1	||	40	36	64	|	36	49	43	||	0	-1.79905	0.166773	8.16793	0.0100932	||	0	-0.128208	0.998613	8.16793	0.679148
Exoc6b	6:85003048-85003285	237	1	0	0	|	3	0	5	||	20	36	38	|	18	45	48	||	0	3.16976	0.178058	7.55441	0.0114811	||	0	0.243077	0.998613	7.55441	0.573677
Strn3	12:51655402-51661713	6311	3	1	4	|	3	9	8	||	61	54	67	|	56	62	73	||	0	1.58748	0.178058	8.53556	0.0115674	||	0	0.0504496	0.998613	8.53556	0.865289
Arhgef10l	4:140562714-140570402	7688	2	0	0	|	3	3	4	||	45	26	27	|	42	22	28	||	0	2.5543	0.178058	7.55358	0.0116936	||	0	-0.137741	0.998613	7.55358	0.725944
Mir99ahg	16:77594622-77596959	2337	0	3	5	|	0	0	0	||	5	2	23	|	4	8	0	||	0	-7.60476	0.178058	5.99273	0.0120991	||	0	-1.18817	0.958124	5.99273	0.252606
Gc	5:89435024-89435642	618	0	0	0	|	2	0	2	||	7894	7929	7900	|	7898	7565	7698	||	0	6.9112	0.178058	14.3177	0.0128286	||	0	-0.0587351	0.998613	14.3177	0.761803
Ahsg	16:22892236-22895215	2979	0	0	0	|	2	0	2	||	7489	7771	7729	|	7417	7762	7876	||	0	6.91118	0.178058	14.2918	0.012836	||	0	-0.0176207	0.998613	14.2918	0.927948
Gpatch2l	12:86260577-86269061	8484	0	0	0	|	3	0	1	||	19	16	15	|	35	26	36	||	0	6.91983	0.178058	7.08263	0.0130547	||	0	0.918452	0.298674	7.08263	0.00844667
Nrip1	16:76330746-76352546	21800	0	0	0	|	2	2	0	||	23	12	21	|	25	20	21	||	0	6.93838	0.178058	6.88317	0.0130604	||	0	0.21079	0.998613	6.88317	0.589561
Dennd1a	2:38116605-38126648	10043	0	0	0	|	2	0	2	||	16	26	21	|	28	28	33	||	0	6.91038	0.178058	7.11603	0.0131235	||	0	0.478705	0.911982	7.11603	0.145709
Cdk13	13:17772301-17772957	656	0	0	0	|	1	1	2	||	39	26	39	|	49	54	45	||	0	6.911	0.178058	7.69301	0.0131978	||	0	0.489043	0.889603	7.69301	0.107921
Bbs9	9:22643745-22679064	35319	0	0	0	|	1	2	1	||	10	7	8	|	8	7	13	||	0	6.9262	0.178058	6.05313	0.0135113	||	0	0.132792	0.998613	6.05313	0.787456
Dpy19l1	9:24473774-24485729	11955	0	0	0	|	0	1	3	||	33	21	35	|	43	30	44	||	0	6.89977	0.178058	7.45577	0.0136229	||	0	0.368507	0.958124	7.45577	0.266049
Tlk1	2:70754440-70786995	32555	0	0	0	|	0	0	4	||	55	89	75	|	71	67	62	||	0	6.8892	0.178058	8.27664	0.0137974	||	0	-0.141293	0.998613	8.27664	0.629422
Lonp2	8:86665691-86673069	7378	2	1	0	|	3	3	6	||	412	493	722	|	380	268	288	||	0	2.22012	0.178058	10.5019	0.0139118	||	0	-0.796756	0.581338	10.5019	0.0263049
Ckap5	2:91562754-91563113	359	0	0	0	|	0	0	4	||	19	27	38	|	26	32	34	||	0	6.88694	0.178058	7.27176	0.0139648	||	0	0.13085	0.998613	7.27176	0.704263
Myef2	2:125116665-125116873	208	0	0	0	|	1	0	3	||	7	14	20	|	22	20	28	||	0	6.89572	0.178058	6.76609	0.0139882	||	0	0.760911	0.814996	6.76609	0.058256
Sox6	7:115659516-115662444	2928	0	0	0	|	1	0	3	||	18	23	22	|	22	30	16	||	0	6.89546	0.178058	6.9572	0.0140182	||	0	0.102099	0.998613	6.9572	0.791017
Pigf	17:87008803-87023913	15110	0	0	0	|	0	4	0	||	22	18	38	|	17	24	47	||	0	6.97005	0.178058	7.20989	0.0141213	||	0	0.167306	0.998613	7.20989	0.734235
Slc10a7	8:78525162-78531158	5996	0	0	0	|	0	2	2	||	25	31	45	|	25	36	61	||	0	6.9109	0.178058	7.5412	0.0141227	||	0	0.266059	0.998613	7.5412	0.493301
Phf21a	2:92210230-92230724	20494	0	0	0	|	0	2	2	||	14	19	34	|	16	14	27	||	0	6.91084	0.178058	6.88308	0.0141932	||	0	-0.228865	0.998613	6.88308	0.592018
Dennd1b	1:139085883-139110485	24602	0	0	0	|	0	1	3	||	22	14	33	|	28	32	23	||	0	6.89491	0.178058	7.11459	0.0142146	||	0	0.263345	0.998613	7.11459	0.498206
Tbcel	9:42437115-42451762	14647	0	0	0	|	0	2	2	||	66	94	73	|	96	57	39	||	0	6.91075	0.178058	8.29998	0.0142809	||	0	-0.298174	0.998613	8.29998	0.430651
Tbcd	11:121496995-121500110	3115	0	0	0	|	0	0	4	||	58	33	71	|	70	62	73	||	0	6.8825	0.178058	8.11993	0.014301	||	0	0.323482	0.998613	8.11993	0.327554
not_annotated	9:46229899-46229943	44	1	0	0	|	5	2	0	||	5621	6891	6862	|	5238	6904	7098	||	0	3.03917	0.178058	14.0454	0.0143459	||	0	-0.0219732	0.998613	14.0454	0.927604
Rab2a	4:8577955-8582493	4538	0	0	0	|	2	0	2	||	278	412	487	|	292	278	429	||	0	6.90721	0.178058	10.237	0.0143741	||	0	-0.241038	0.998613	10.237	0.501664
not_annotated	3:83042584-83042634	50	3	0	2	|	0	0	0	||	7157	7126	7373	|	7077	7291	7619	||	0	-6.97883	0.178058	14.2164	0.0144257	||	0	-0.000555862	0.999964	14.2164	0.997772
Ttr	18:20669992-20670114	122	0	2	3	|	0	0	0	||	7969	8025	8019	|	7927	8006	7970	||	0	-6.97611	0.178058	14.3487	0.0144486	||	0	-0.0296539	0.998613	14.3487	0.878008
Cep63	9:102618811-102619760	949	0	0	0	|	0	2	2	||	9	7	24	|	24	20	35	||	0	6.91033	0.178058	6.83871	0.0147615	||	0	0.975711	0.756847	6.83871	0.0394045
Sdccag8	1:176868212-176874698	6486	0	0	0	|	0	0	4	||	18	10	24	|	18	17	24	||	0	6.87644	0.178058	6.77086	0.0147766	||	0	0.166921	0.998613	6.77086	0.69159
Gm29571	10:25671963-25673666	1703	0	0	0	|	2	2	0	||	10	21	10	|	16	7	5	||	0	6.97445	0.178058	6.29958	0.0147868	||	0	-0.563773	0.998613	6.29958	0.343371
Lpp	16:24442781-24456942	14161	2	2	1	|	0	0	0	||	49	69	63	|	62	87	81	||	0	-6.98353	0.178058	8.2732	0.0148415	||	0	0.334989	0.958124	8.2732	0.253544
Ice2	9:69407117-69410889	3772	1	0	4	|	0	0	0	||	14	20	20	|	15	16	14	||	0	-6.9712	0.178058	6.68191	0.0148629	||	0	-0.270239	0.998613	6.68191	0.457327
Oma1	4:103319022-103353651	34629	1	1	3	|	0	0	0	||	34	50	57	|	28	35	40	||	0	-6.97467	0.178058	7.66458	0.0148645	||	0	-0.455428	0.903042	7.66458	0.128468
Matr3	18:35584515-35584881	366	0	0	0	|	2	0	2	||	204	203	519	|	264	231	269	||	0	6.90585	0.178058	9.92026	0.0149697	||	0	-0.253804	0.998613	9.92026	0.529578
Tshz2	2:169883526-169886586	3060	0	0	0	|	0	2	2	||	5	13	10	|	12	14	28	||	0	6.91012	0.178058	6.45832	0.0150062	||	0	0.917115	0.832304	6.45832	0.0761863
Rabgap1l	1:160700712-160702460	1748	8	9	10	|	2	2	4	||	72	87	146	|	101	79	68	||	0	-1.5026	0.178058	8.99887	0.0151866	||	0	-0.288954	0.998613	8.99887	0.361766
Mta1	12:113112146-113123234	11088	0	0	0	|	1	0	3	||	13	21	9	|	29	16	17	||	0	6.88574	0.178058	6.71971	0.0152067	||	0	0.487574	0.972244	6.71971	0.298052
Fyb	15:6640441-6652544	12103	0	0	0	|	0	3	1	||	6	12	11	|	16	54	48	||	0	6.94279	0.178058	7.08413	0.0152164	||	0	2.004	0.0576977	7.08413	0.000319973
Taok3	5:117215349-117217240	1891	3	0	2	|	0	0	0	||	38	42	53	|	57	79	43	||	0	-6.97855	0.178058	7.9545	0.015326	||	0	0.42784	0.911982	7.9545	0.197137
Kcmf1	6:72858774-72861925	3151	3	0	2	|	0	0	0	||	92	69	77	|	113	72	96	||	0	-6.97855	0.178058	8.54684	0.0153466	||	0	0.2023	0.998613	8.54684	0.522953
Apc	18:34261005-34279352	18347	0	0	5	|	0	0	0	||	47	59	51	|	43	26	29	||	0	-6.96304	0.178058	7.71988	0.0155105	||	0	-0.698745	0.661475	7.71988	0.0318017
Ranbp9	13:43419576-43425214	5638	0	0	5	|	0	0	0	||	39	66	59	|	57	60	44	||	0	-6.96269	0.178058	7.99578	0.0155561	||	0	-0.0306718	0.998613	7.99578	0.922391
Wapl	14:34730549-34731609	1060	2	0	3	|	2	6	7	||	161	137	199	|	184	112	149	||	0	1.83827	0.178058	9.3968	0.015585	||	0	-0.179279	0.998613	9.3968	0.583126
Rbm27	18:42320764-42324198	3434	0	0	5	|	0	0	0	||	22	32	31	|	33	19	28	||	0	-6.96203	0.178058	7.22384	0.0156425	||	0	-0.103489	0.998613	7.22384	0.770765
Spata5	3:37448408-37464658	16250	1	4	0	|	0	0	0	||	32	21	52	|	38	23	41	||	0	-6.99514	0.178058	7.47568	0.0156489	||	0	-0.0503667	0.998613	7.47568	0.899555
Nfix	8:84771784-84779275	7491	0	2	3	|	0	0	0	||	41	55	28	|	43	43	33	||	0	-6.97159	0.178058	7.67441	0.0158595	||	0	-0.089502	0.998613	7.67441	0.806517
Dym	18:75080203-75126919	46716	0	0	0	|	0	0	4	||	31	29	14	|	34	29	22	||	0	6.86338	0.178058	7.17732	0.0158738	||	0	0.15382	0.998613	7.17732	0.730586
Ddx19a	8:110980553-110981093	540	1	1	3	|	0	0	0	||	39	62	28	|	39	33	32	||	0	-6.9711	0.178058	7.62503	0.0160064	||	0	-0.341484	0.998613	7.62503	0.36441
Zranb1	7:132949585-132960734	11149	1	0	4	|	0	0	0	||	55	43	89	|	60	35	38	||	0	-6.96463	0.178058	7.97172	0.0160271	||	0	-0.493807	0.911982	7.97172	0.163555
Nfatc3	8:106099072-106100989	1917	0	0	0	|	1	0	3	||	20	69	26	|	38	34	44	||	0	6.87927	0.178058	7.58751	0.0160805	||	0	-0.0079372	0.999964	7.58751	0.986445
Man2b1	8:85097409-85097574	165	0	1	4	|	0	0	0	||	126	183	133	|	94	144	141	||	0	-6.96406	0.178058	9.08653	0.0161457	||	0	-0.238501	0.998613	9.08653	0.481151
Slc30a9	5:67324674-67334668	9994	0	0	5	|	0	0	0	||	52	71	122	|	61	52	61	||	0	-6.95825	0.178058	8.27757	0.0161461	||	0	-0.480806	0.911982	8.27757	0.159904
Epb41	4:132000200-132003794	3594	0	0	0	|	0	0	4	||	119	95	66	|	184	112	88	||	0	6.85943	0.178058	8.82984	0.016226	||	0	0.40396	0.998613	8.82984	0.337368
Cabin1	10:75694715-75700095	5380	0	5	0	|	0	0	0	||	6	6	6	|	13	13	9	||	0	-6.99979	0.178058	6.08881	0.0163615	||	0	0.917615	0.878632	6.08881	0.102012
Ddx17	15:79541034-79542586	1552	2	1	2	|	3	0	14	||	274	176	328	|	263	170	237	||	0	1.90447	0.178058	9.88272	0.0164025	||	0	-0.236941	0.998613	9.88272	0.56836
Gas2	7:51887912-51926544	38632	0	0	0	|	2	0	2	||	30	29	70	|	39	13	11	||	0	6.90283	0.178058	7.36331	0.0164321	||	0	-1.01503	0.814996	7.36331	0.0577232
Spire1	18:67519291-67519890	599	0	0	0	|	0	0	5	||	3	3	0	|	2	5	7	||	0	7.067	0.178058	5.38225	0.0166237	||	0	1.07974	0.958124	5.38225	0.270053
Slc10a7	8:78686585-78706948	20363	0	0	0	|	0	0	4	||	14	28	23	|	11	24	34	||	0	6.85479	0.178058	6.97369	0.0166535	||	0	0.0779558	0.998613	6.97369	0.873384
Dnajc3	14:118972712-118972813	101	2	2	1	|	0	0	0	||	763	472	571	|	447	268	476	||	0	-6.98904	0.178058	10.6553	0.0167181	||	0	-0.651594	0.898324	10.6553	0.113815
Ppp4r1	17:65803211-65816050	12839	0	0	5	|	0	0	0	||	24	43	22	|	31	25	43	||	0	-6.95218	0.180062	7.37386	0.0170081	||	0	0.120668	0.998613	7.37386	0.771143
Cdo1	18:46713470-46713761	291	2	0	3	|	0	0	0	||	2277	2196	3492	|	2332	1093	1681	||	0	-6.96783	0.180272	12.5383	0.0171601	||	0	-0.654456	0.878632	12.5383	0.102349
Cps1	1:67145787-67145843	56	2	3	7	|	2	0	0	||	8061	8070	8066	|	8047	6854	5204	||	0	-2.29338	0.180272	14.2454	0.0172318	||	0	-0.288617	0.932583	14.2454	0.229338
Ube3a	7:59240967-59262058	21091	1	0	4	|	0	0	0	||	25	22	65	|	24	18	27	||	0	-6.95786	0.18082	7.31443	0.0173866	||	0	-0.677645	0.903042	7.31443	0.131464
Cdk8	5:146259505-146271735	12230	2	0	1	|	0	3	8	||	66	64	59	|	52	44	42	||	0	2.08741	0.181774	8.16489	0.0176338	||	0	-0.477882	0.889603	8.16489	0.106606
Calm1	12:100206174-100206233	59	2	3	0	|	0	0	0	||	780	775	1099	|	516	477	1286	||	0	-7.00684	0.181774	11.2618	0.0176839	||	0	-0.242399	0.998613	11.2618	0.6202
Gpsm2	3:108711277-108711580	303	0	0	5	|	0	0	0	||	8	15	27	|	15	15	15	||	0	-6.94698	0.181938	6.62835	0.0178027	||	0	-0.132854	0.998613	6.62835	0.786642
Fgl1	8:41196958-41197402	444	0	0	0	|	0	2	2	||	1253	1617	1767	|	1213	6420	8030	||	0	6.90806	0.183714	13.1461	0.0180804	||	0	1.75373	0.205828	13.1461	0.00349256
Pi4k2a	19:42115037-42116566	1529	2	0	3	|	0	0	0	||	42	66	18	|	47	45	30	||	0	-6.96513	0.184165	7.70225	0.0182455	||	0	-0.0886622	0.998613	7.70225	0.855703
Hmgcs2	3:98290887-98291341	454	2	0	0	|	4	1	4	||	5002	5597	3947	|	6135	5519	5136	||	0	2.39607	0.184165	13.7633	0.0185497	||	0	0.17273	0.998613	13.7633	0.543079
Mga	2:119921366-119921842	476	7	14	7	|	3	0	6	||	32	59	56	|	37	47	44	||	0	-1.42266	0.184165	8.38907	0.018566	||	0	-0.199344	0.998613	8.38907	0.564617
Malat1	19:5802238-5802426	188	0	3	2	|	0	0	0	||	814	1363	2714	|	1113	1961	1582	||	0	-6.97812	0.184165	12.1108	0.0186312	||	0	-0.0266459	0.999964	12.1108	0.956976
Crebrf	17:26739543-26743131	3588	8	7	6	|	9	16	16	||	68	67	123	|	99	48	47	||	0	1.23213	0.184165	9.20375	0.0186457	||	0	-0.410305	0.958124	9.20375	0.283732
Slf1	13:77083441-77092411	8970	0	4	1	|	0	0	0	||	6	7	18	|	5	15	13	||	0	-6.99442	0.186133	6.24986	0.0189502	||	0	0.11475	0.998613	6.24986	0.855359
Stau2	1:16440323-16509408	69085	0	1	4	|	0	0	0	||	8	26	28	|	12	22	9	||	0	-6.94959	0.188736	6.73721	0.0193405	||	0	-0.490508	0.998613	6.73721	0.378272
Rps25	9:44408770-44410052	1282	0	0	5	|	0	0	0	||	913	1038	1412	|	1091	947	2223	||	0	-6.9368	0.188736	11.8188	0.0195226	||	0	0.325008	0.998613	11.8188	0.496368
Pms1	1:53256629-53282092	25463	0	0	1	|	2	4	1	||	5	13	18	|	5	4	11	||	0	3.08574	0.188736	6.23376	0.0196231	||	0	-0.820078	0.911982	6.23376	0.174442
Rbm33	5:28331111-28352643	21532	2	0	7	|	0	1	0	||	33	36	53	|	49	44	31	||	0	-2.84752	0.188736	7.77051	0.0196423	||	0	0.0223645	0.999964	7.77051	0.947197
Camsap1	2:25965663-25966948	1285	1	3	8	|	0	0	2	||	11	10	10	|	17	17	10	||	0	-2.30848	0.190401	6.69218	0.0199232	||	0	0.479088	0.967185	6.69218	0.294313
Ccdc171	4:83535790-83554884	19094	0	0	0	|	1	1	2	||	1	1	8	|	2	1	4	||	0	6.90172	0.19265	5.23035	0.0202675	||	0	-0.448735	0.998613	5.23035	0.616584
Gm26917	17:39844698-39845193	495	0	0	0	|	1	2	1	||	327	37	153	|	425	73	141	||	0	6.96562	0.194513	9.49595	0.0206341	||	0	0.212608	0.998613	9.49595	0.780376
not_annotated	2:119076936-119081625	4689	2	3	0	|	0	0	0	||	4	9	7	|	4	17	4	||	0	-7.01947	0.194513	5.95226	0.0206835	||	0	0.329947	0.998613	6.48125	0.628736
Bckdhb	9:83952524-83991822	39298	4	3	9	|	5	9	18	||	207	223	310	|	288	211	241	||	0	1.23614	0.199465	10.1048	0.0214187	||	0	-0.00792059	0.999964	10.1048	0.980684
Fggy	4:95837585-95849676	12091	5	15	0	|	2	0	2	||	388	490	499	|	342	157	155	||	0	-2.14646	0.199465	10.2907	0.0214357	||	0	-1.09273	0.832304	10.2907	0.0671697
Rnf214	9:45869179-45869544	365	7	0	1	|	2	8	10	||	39	25	40	|	43	31	23	||	0	1.54643	0.208066	7.94928	0.0224777	||	0	-0.119639	0.998613	7.94928	0.768474
Rgn	X:20559426-20559486	60	2	2	8	|	2	0	0	||	4287	3676	6505	|	2867	1663	2354	||	0	-2.27067	0.215917	13.2178	0.0238269	||	0	-1.08174	0.179453	13.2178	0.0021973
Pten	19:32792549-32800099	7550	2	0	0	|	1	0	8	||	105	145	204	|	113	123	147	||	0	2.33691	0.215917	9.15789	0.0238948	||	0	-0.239596	0.998613	9.15789	0.48207
Klhl3	13:58030413-58051138	20725	0	1	0	|	4	0	3	||	29	12	12	|	24	15	9	||	0	3.00373	0.215917	6.80698	0.0247508	||	0	-0.197443	0.998613	6.80698	0.728364
Rreb1	13:37888871-37899787	10916	5	5	6	|	2	0	2	||	69	47	62	|	42	48	46	||	0	-1.73999	0.215917	8.22496	0.0247632	||	0	-0.410638	0.911982	8.22496	0.173288
Knl1	2:119076936-119081625	4689	4	9	3	|	1	0	2	||	4	9	7	|	4	17	4	||	0	-2.21152	0.215917	6.48125	0.0247915	||	0	0.333023	0.998613	5.95226	0.654895
Ehmt1	2:24813527-24825067	11540	7	3	4	|	1	1	1	||	43	34	26	|	28	32	18	||	0	-1.9575	0.215917	7.61494	0.0257395	||	0	-0.430227	0.958124	7.61494	0.262769
Usp48	4:137604523-137608182	3659	4	0	0	|	0	0	0	||	47	40	42	|	37	39	35	||	0	-6.66635	0.215917	7.63952	0.0285498	||	0	-0.238251	0.998613	7.63952	0.425808
Ash1l	3:89033259-89043643	10384	0	4	0	|	0	0	0	||	33	48	36	|	40	46	48	||	0	-6.66705	0.215917	7.68659	0.0286556	||	0	0.176807	0.998613	7.68659	0.562283
Phf3	1:30837105-30863255	26150	2	2	0	|	0	0	0	||	33	48	36	|	48	35	33	||	0	-6.66736	0.215917	7.60059	0.0287365	||	0	-0.0321195	0.998613	7.60059	0.918706
Rnf2	1:151473072-151478625	5553	0	1	3	|	0	0	0	||	46	55	51	|	62	48	61	||	0	-6.655	0.215917	7.9734	0.0287607	||	0	0.148008	0.998613	7.9734	0.578935
Zfx	X:94098283-94114263	15980	3	1	0	|	0	0	0	||	29	40	52	|	26	24	40	||	0	-6.66821	0.215917	7.47761	0.0289199	||	0	-0.431154	0.911982	7.47761	0.196744
Mapkap1	2:34432003-34444406	12403	1	1	9	|	0	1	1	||	77	82	97	|	64	55	75	||	0	-2.16378	0.215917	8.4873	0.0289326	||	0	-0.41603	0.911982	8.4873	0.16553
Zfp790	7:29822980-29824953	1973	2	0	2	|	0	0	0	||	20	27	30	|	23	15	15	||	0	-6.65791	0.215917	6.94161	0.0290247	||	0	-0.544174	0.903042	6.94161	0.121502
Dennd5a	7:109911915-109927014	15099	1	0	3	|	0	0	0	||	71	75	87	|	92	89	75	||	0	-6.6533	0.215917	8.45983	0.0292568	||	0	0.123573	0.998613	8.45983	0.659573
Arih1	9:59394878-59405855	10977	0	1	3	|	0	0	0	||	104	102	107	|	112	84	93	||	0	-6.65294	0.215917	8.70624	0.0293751	||	0	-0.139209	0.998613	8.70624	0.621485
Erc1	6:119824386-119825819	1433	2	0	2	|	0	0	0	||	33	31	25	|	38	32	24	||	0	-6.65735	0.215917	7.33067	0.0295039	||	0	0.0509549	0.998613	7.33067	0.883751
Nipbl	15:8307565-8307986	421	0	0	4	|	0	0	0	||	43	56	55	|	61	72	49	||	0	-6.64822	0.215917	8.02113	0.0295507	||	0	0.232774	0.998613	8.02113	0.436271
Gigyf2	1:87364104-87374111	10007	0	1	3	|	0	0	0	||	72	47	81	|	65	66	81	||	0	-6.65209	0.215917	8.25798	0.0296346	||	0	0.065133	0.998613	8.25798	0.83185
Usp30	5:114102383-114103826	1443	1	0	3	|	0	0	0	||	18	19	17	|	18	17	10	||	0	-6.65157	0.215917	6.65984	0.0297832	||	0	-0.276992	0.998613	6.65984	0.487837
Exoc5	14:49035999-49039383	3384	0	0	4	|	0	0	0	||	55	39	78	|	55	53	55	||	0	-6.64693	0.215917	8.01191	0.0298077	||	0	-0.0839859	0.998613	8.01191	0.787313
Map2k4	11:65706984-65719603	12619	0	0	4	|	0	0	0	||	70	78	103	|	90	55	78	||	0	-6.64646	0.215917	8.41528	0.0299019	||	0	-0.18344	0.998613	8.41528	0.546959
Ap1g1	8:109832717-109833566	849	2	0	2	|	0	0	0	||	104	147	116	|	115	80	64	||	0	-6.65672	0.215917	8.75407	0.0300629	||	0	-0.520939	0.903042	8.75407	0.119181
Tbc1d5	17:50917527-50935558	18031	0	0	4	|	0	0	0	||	21	33	27	|	33	25	21	||	0	-6.64563	0.215917	7.17128	0.0300682	||	0	-0.0497498	0.998613	7.17128	0.890416
Parn	16:13625509-13647299	21790	0	0	4	|	0	0	0	||	22	36	35	|	19	19	30	||	0	-6.64536	0.215917	7.17365	0.0301247	||	0	-0.459283	0.911982	7.17365	0.207531
Akap7	10:25267308-25271641	4333	0	0	4	|	0	0	0	||	18	21	41	|	36	37	37	||	0	-6.64472	0.215917	7.35519	0.0302542	||	0	0.462998	0.911982	7.35519	0.197704
Hsdl2	4:59596863-59606543	9680	0	0	4	|	0	0	0	||	176	161	223	|	204	158	191	||	0	-6.64406	0.215917	9.43016	0.0303905	||	0	-0.0341491	0.998613	9.43016	0.912911
Ezh2	6:47540677-47577667	36990	4	0	0	|	0	0	0	||	9	15	22	|	7	6	10	||	0	-6.67566	0.215917	6.28557	0.0306115	||	0	-0.976469	0.814996	6.28557	0.0603168
Tram1	1:13571803-13576452	4649	2	2	0	|	0	0	0	||	303	390	434	|	199	295	446	||	0	-6.67595	0.215917	10.179	0.0306319	||	0	-0.272393	0.998613	10.179	0.489451
Pcbp2	15:102473285-102478747	5462	2	2	0	|	0	0	0	||	135	261	137	|	218	286	199	||	0	-6.67605	0.215917	9.56836	0.0306573	||	0	0.384473	0.998613	9.56836	0.335439
Cstf1	2:172375638-172376249	611	0	0	0	|	0	3	0	||	22	25	25	|	28	26	38	||	0	6.51633	0.215917	7.17965	0.0306832	||	0	0.330752	0.991275	7.17965	0.312229
Rprd1b	2:158035996-158050213	14217	0	0	0	|	3	0	0	||	27	20	31	|	26	23	32	||	0	6.51529	0.215917	7.14478	0.0309071	||	0	0.0353508	0.998613	7.14478	0.91729
Gm340	19:41581778-41586716	4938	0	0	0	|	2	1	0	||	6	5	9	|	11	9	11	||	0	6.51799	0.215917	5.97763	0.0309904	||	0	0.602156	0.911982	5.97763	0.208293
Tmem241	18:12058926-12074643	15717	2	0	2	|	0	0	0	||	16	17	39	|	14	25	22	||	0	-6.65558	0.215917	6.96062	0.0311159	||	0	-0.218872	0.998613	6.96062	0.620329
Glud1	14:34321768-34336576	14808	2	2	0	|	0	0	0	||	1660	3103	1824	|	2186	1653	1403	||	0	-6.67795	0.215917	12.4174	0.0311255	||	0	-0.349986	0.998613	12.4174	0.402472
Usp3	9:66540062-66547955	7893	0	0	0	|	1	2	0	||	52	26	44	|	55	41	47	||	0	6.52331	0.215917	7.73498	0.031223	||	0	0.196354	0.998613	7.73498	0.576922
Rere	4:150406196-150431593	25397	0	0	0	|	0	3	0	||	11	25	27	|	21	21	19	||	0	6.52599	0.215917	6.86441	0.0312455	||	0	-0.0426891	0.998613	6.86441	0.915554
Gpatch2	1:187225503-187233826	8323	0	0	0	|	0	3	0	||	33	30	65	|	44	29	33	||	0	6.52615	0.215917	7.576	0.0312554	||	0	-0.267507	0.998613	7.576	0.465373
Smg6	11:74928993-74990215	61222	0	0	0	|	1	2	0	||	18	26	31	|	19	33	19	||	0	6.52468	0.215917	7.05064	0.0313148	||	0	-0.072912	0.998613	7.05064	0.852531
Wdr26	1:181187606-181198944	11338	0	0	0	|	1	2	0	||	145	177	145	|	218	143	138	||	0	6.52482	0.215917	9.26293	0.0313243	||	0	0.0690414	0.998613	9.26293	0.834337
Lrrc58	16:37877049-37878564	1515	0	0	0	|	2	0	1	||	64	72	65	|	85	79	60	||	0	6.5048	0.215917	8.28713	0.0313316	||	0	0.137316	0.998613	8.28713	0.637277
Mtdh	15:34114024-34123766	9742	0	0	0	|	1	2	0	||	112	84	94	|	119	62	82	||	0	6.52525	0.215917	8.60075	0.0313531	||	0	-0.179606	0.998613	8.60075	0.599921
Mtmr3	11:4527836-4531305	3469	0	0	0	|	2	1	0	||	41	49	45	|	62	29	70	||	0	6.523	0.215917	7.85484	0.0313585	||	0	0.220649	0.998613	7.85484	0.534458
Nhlrc2	19:56570416-56576284	5868	1	0	0	|	2	0	4	||	37	34	40	|	61	47	41	||	0	2.77698	0.215917	7.78195	0.0314163	||	0	0.404375	0.911982	7.78195	0.177795
Nfkb1	3:135655500-135669339	13839	2	1	5	|	2	4	12	||	19	26	22	|	20	22	33	||	0	1.39392	0.215917	7.57984	0.0314861	||	0	0.141539	0.998613	7.57984	0.694339
Map3k5	10:20067829-20082468	14639	0	0	0	|	0	3	0	||	42	26	23	|	35	29	26	||	0	6.53028	0.215917	7.30498	0.03151	||	0	-0.0593155	0.998613	7.30498	0.882988
Pum1	4:130668925-130669298	373	0	0	0	|	1	0	2	||	75	85	74	|	75	60	59	||	0	6.49515	0.215917	8.29366	0.0315592	||	0	-0.293171	0.966808	8.29366	0.293105
Atp6v1h	1:5093363-5133262	39899	0	0	0	|	1	2	0	||	178	174	235	|	169	84	172	||	0	6.52833	0.215917	9.31029	0.0315652	||	0	-0.488881	0.911982	9.31029	0.168552
Faf1	4:109925298-109935698	10400	0	0	0	|	1	0	2	||	67	68	72	|	77	52	55	||	0	6.49506	0.215917	8.18425	0.0315797	||	0	-0.191362	0.998613	8.18425	0.499131
Rad23b	4:55366777-55370472	3695	0	6	2	|	0	0	1	||	143	94	155	|	141	83	127	||	0	-2.72283	0.215917	9.00934	0.0315826	||	0	-0.187204	0.998613	9.00934	0.594371
Hirip3	7:126864320-126864661	341	0	1	3	|	0	0	0	||	8	4	9	|	6	9	6	||	0	-6.64609	0.215917	5.85123	0.031593	||	0	-0.0103377	0.999964	5.85123	0.985213
Dis3l	9:64329433-64330915	1482	0	0	0	|	0	3	0	||	18	19	12	|	8	13	11	||	0	6.53217	0.215917	6.43252	0.03163	||	0	-0.631376	0.911982	6.43252	0.183852
Efnb2	8:8639206-8639489	283	0	0	0	|	2	0	1	||	6	8	7	|	7	8	11	||	0	6.50543	0.215917	5.90713	0.0316804	||	0	0.282365	0.998613	5.90713	0.568613
Smg7	1:152854310-152856611	2301	0	0	0	|	0	0	3	||	45	37	57	|	46	42	41	||	0	6.48744	0.215917	7.73832	0.0317319	||	0	-0.119477	0.998613	7.73832	0.67794
Mef2a	7:67264865-67268400	3535	0	1	0	|	2	1	3	||	22	35	38	|	30	45	52	||	0	2.78547	0.215917	7.60147	0.0317794	||	0	0.412035	0.911982	7.60147	0.213933
Mllt10	2:18092784-18123812	31028	0	0	0	|	0	0	3	||	38	51	39	|	32	27	34	||	0	6.487	0.215917	7.51891	0.0317895	||	0	-0.480561	0.898324	7.51891	0.112177
Pzp	6:128516847-128516917	70	0	4	9	|	2	1	0	||	7769	7714	7740	|	6971	7734	7816	||	0	-1.82693	0.215917	14.2901	0.0318292	||	0	-0.067175	0.998613	14.2901	0.748368
Hivep1	13:42055400-42055542	142	0	0	4	|	0	0	0	||	13	19	30	|	11	13	22	||	0	-6.63723	0.215917	6.73498	0.031858	||	0	-0.422981	0.998613	6.73498	0.353148
Asxl2	12:3442474-3474613	32139	0	0	0	|	2	0	1	||	24	17	15	|	15	19	21	||	0	6.50577	0.215917	6.75897	0.031872	||	0	-0.0580885	0.998613	6.75897	0.885395
Prdx6	1:161243575-161247413	3838	2	2	0	|	0	0	0	||	1250	1018	762	|	988	608	523	||	0	-6.681	0.215917	11.3405	0.031918	||	0	-0.566184	0.911982	11.3405	0.219226
Rangap1	15:81716567-81718922	2355	0	1	3	|	0	0	0	||	110	76	47	|	48	65	68	||	0	-6.64511	0.215917	8.2848	0.0319317	||	0	-0.419684	0.986098	8.2848	0.308636
Ccdc6	10:70142579-70154836	12257	0	0	0	|	2	1	0	||	27	21	16	|	37	18	20	||	0	6.53051	0.215917	7.00283	0.0319442	||	0	0.182576	0.998613	7.00283	0.678797
Ppil4	10:7798467-7810458	11991	0	0	0	|	1	0	2	||	38	42	71	|	62	37	49	||	0	6.49327	0.215917	7.85789	0.0320293	||	0	-0.032185	0.998613	7.85789	0.919873
D230025D16Rik	8:105240841-105248786	7945	0	0	4	|	0	0	0	||	108	146	107	|	117	55	55	||	0	-6.63615	0.215917	8.6792	0.0320996	||	0	-0.697966	0.832304	8.6792	0.0781462
Eya3	4:132656693-132670255	13562	0	0	0	|	0	3	0	||	33	48	22	|	24	47	47	||	0	6.5396	0.215917	7.53044	0.0321188	||	0	0.164703	0.998613	7.53044	0.71098
Trappc6b	12:59050268-59051708	1440	0	0	0	|	2	0	1	||	49	42	91	|	61	38	75	||	0	6.50643	0.215917	8.06114	0.0322521	||	0	-0.0690691	0.998613	8.06114	0.848628
Smg6	11:75038613-75042036	3423	0	0	0	|	0	0	3	||	16	14	17	|	31	22	19	||	0	6.4822	0.215917	6.82295	0.0324159	||	0	0.589972	0.90296	6.82295	0.116853
Strn3	12:51661151-51661713	562	0	0	0	|	0	0	3	||	88	74	101	|	74	85	108	||	0	6.48178	0.215917	8.54061	0.0324724	||	0	0.00353114	0.999964	8.54061	0.990576
Cops7b	1:86599003-86601188	2185	0	0	0	|	1	0	2	||	14	28	27	|	14	17	24	||	0	6.49153	0.215917	6.86262	0.0324724	||	0	-0.329328	0.998613	6.86262	0.404113
Zfp516	18:82955524-82957449	1925	0	0	0	|	0	1	2	||	9	7	8	|	7	13	11	||	0	6.49203	0.215917	6.05109	0.0326626	||	0	0.343531	0.998613	6.05109	0.484131
Cpsf6	10:117366081-117367988	1907	0	0	0	|	0	0	3	||	49	53	101	|	63	62	73	||	0	6.47969	0.215917	8.20022	0.0327515	||	0	-0.028918	0.998613	8.20022	0.927979
Nhlrc2	19:56574817-56576284	1467	0	0	1	|	1	0	5	||	51	45	65	|	67	61	43	||	0	2.76894	0.215917	8.05617	0.0327938	||	0	0.0779444	0.998613	8.05617	0.800834
Ptbp3	4:59514274-59517755	3481	0	0	4	|	0	0	0	||	94	186	227	|	117	135	232	||	0	-6.63311	0.215917	9.27997	0.0327962	||	0	-0.0603188	0.998613	9.27997	0.883958
Cyp2c70	19:40153519-40167623	14104	4	3	4	|	1	0	1	||	3351	4600	5265	|	1574	1153	2611	||	0	-2.19027	0.215917	13.0253	0.0328106	||	0	-1.32472	0.0576977	13.0253	0.000345547
Ilkap	1:91376318-91381972	5654	0	0	0	|	0	0	3	||	82	71	94	|	113	63	73	||	0	6.47795	0.215917	8.46049	0.0329863	||	0	-0.0107833	0.999964	8.46049	0.973526
Ezh2	6:47576563-47577667	1104	4	9	9	|	2	3	2	||	15	22	33	|	12	13	17	||	0	-1.37758	0.215917	7.45676	0.0330195	||	0	-0.727828	0.814996	7.45676	0.0551238
Usp32	11:85017630-85019876	2246	0	0	0	|	0	0	3	||	27	48	52	|	33	17	29	||	0	6.47761	0.215917	7.42611	0.0330332	||	0	-0.688047	0.814996	7.42611	0.057795
Qk	17:10273947-10282981	9034	0	0	0	|	0	0	3	||	134	180	217	|	178	136	223	||	0	6.47557	0.215917	9.36648	0.0333126	||	0	0.0058518	0.999964	9.36648	0.985689
Sh3kbp1	X:159816577-159828579	12002	0	0	0	|	0	2	1	||	5	6	13	|	9	15	8	||	0	6.51329	0.215917	6.06138	0.0333363	||	0	0.41902	0.998613	6.06138	0.447317
Ambra1	2:91810030-91825352	15322	0	0	0	|	0	1	2	||	27	42	23	|	36	55	29	||	0	6.48978	0.215917	7.47937	0.033341	||	0	0.365912	0.998613	7.47937	0.365641
Dicer1	12:104737769-104738848	1079	0	3	0	|	2	0	8	||	17	17	24	|	19	15	20	||	0	1.93124	0.215917	7.02507	0.0334353	||	0	-0.114881	0.998613	7.02507	0.764837
Top3a	11:60747866-60749589	1723	0	0	0	|	2	1	0	||	3	6	4	|	7	12	4	||	0	6.54754	0.215917	5.69096	0.0334502	||	0	0.789115	0.94043	5.69096	0.236703
Atxn2	5:121745723-121749229	3506	2	2	1	|	3	3	7	||	51	32	52	|	59	55	50	||	0	1.61103	0.215917	8.13964	0.033475	||	0	0.260345	0.998613	8.13964	0.387041
Hdgfl3	7:81893799-81905636	11837	0	0	5	|	0	0	0	||	2	5	17	|	5	12	2	||	0	-6.88536	0.215917	5.89741	0.0336037	||	0	-0.245167	0.998613	5.89741	0.795944
Bub1b	2:118622135-118623185	1050	0	0	0	|	0	0	3	||	7	17	19	|	12	14	12	||	0	6.47196	0.215917	6.413	0.0338153	||	0	-0.170594	0.998613	6.413	0.709125
Ankfy1	11:72712157-72714483	2326	0	0	0	|	1	1	1	||	37	58	56	|	37	23	93	||	0	6.51192	0.215917	7.87848	0.0339089	||	0	-0.00828429	0.999964	7.87848	0.98579
Tgfbr2	9:116129816-116131713	1897	0	0	0	|	0	0	3	||	45	26	28	|	33	40	59	||	0	6.47078	0.215917	7.57456	0.0339804	||	0	0.368607	0.998613	7.57456	0.347047
Ddx17	15:79542487-79543856	1369	2	0	6	|	1	0	0	||	209	185	304	|	229	203	233	||	0	-2.67806	0.215917	9.71137	0.0340225	||	0	-0.0765828	0.998613	9.71137	0.814821
Map2k2	10:81108748-81118229	9481	0	0	0	|	1	0	2	||	179	109	79	|	151	105	119	||	0	6.48531	0.215917	8.95888	0.0341547	||	0	-0.0341012	0.999964	8.95888	0.932716
Homer1	13:93341756-93356079	14323	1	0	0	|	2	1	3	||	14	35	42	|	21	20	27	||	0	2.78273	0.215917	7.22633	0.0342686	||	0	-0.408728	0.981472	7.22633	0.305877
Lnpk	2:74568941-74573626	4685	0	5	3	|	1	0	0	||	18	25	21	|	8	19	19	||	0	-2.69652	0.215917	6.90616	0.034357	||	0	-0.4826	0.958124	6.90616	0.276666
Rab10	12:3252612-3264749	12137	0	0	0	|	0	0	3	||	227	164	204	|	193	95	182	||	0	6.46757	0.215917	9.37458	0.0344392	||	0	-0.382098	0.984413	9.37458	0.307351
Tlk1	2:70786877-70786995	118	0	0	0	|	0	0	3	||	105	90	101	|	50	59	127	||	0	6.46526	0.216841	8.54663	0.0347748	||	0	-0.361562	0.998613	8.54663	0.362265
Atp8a1	5:67729792-67738482	8690	0	0	0	|	0	0	3	||	22	24	18	|	17	38	43	||	0	6.46478	0.216841	7.16815	0.0348451	||	0	0.584888	0.911982	7.16815	0.185079
Usp3	9:66540062-66566903	26841	3	6	6	|	1	1	2	||	34	21	35	|	33	33	36	||	0	-1.6445	0.216841	7.70309	0.0349617	||	0	0.160104	0.998613	7.70309	0.611414
Atf6	1:170815423-170819432	4009	0	0	0	|	0	0	3	||	170	106	77	|	107	86	119	||	0	6.46314	0.216841	8.82737	0.0350871	||	0	-0.24297	0.998613	8.82737	0.547925
Bub1b	2:118630945-118631899	954	4	0	0	|	0	0	0	||	6	7	28	|	9	14	15	||	0	-6.6916	0.216841	6.41166	0.0352907	||	0	-0.0642516	0.998613	6.41166	0.923319
Abca1	4:53107006-53109285	2279	2	9	2	|	0	0	3	||	203	245	178	|	215	203	170	||	0	-1.90335	0.216841	9.649	0.0354155	||	0	-0.117113	0.998613	9.649	0.749301
Ccnl1	3:65948262-65951554	3292	0	0	0	|	0	0	3	||	55	65	164	|	97	124	84	||	0	6.46022	0.216841	8.65205	0.0355231	||	0	0.141282	0.998613	8.65205	0.737608
Kif11	19:37390779-37390850	71	0	0	0	|	0	2	1	||	9	27	42	|	15	27	9	||	0	6.51935	0.216841	6.90144	0.0355678	||	0	-0.557283	0.998613	6.90144	0.33725
Sema4b	7:80215624-80217099	1475	0	0	4	|	0	0	0	||	22	13	22	|	10	31	42	||	0	-6.62061	0.218327	7.0262	0.035935	||	0	0.516299	0.998613	7.0262	0.35764
Ylpm1	12:85049692-85050372	680	1	0	0	|	0	0	6	||	44	34	31	|	27	38	32	||	0	2.74195	0.218624	7.52872	0.0362895	||	0	-0.196549	0.998613	7.52872	0.590143
Afm	5:90531492-90545519	14027	1	5	5	|	1	0	1	||	488	844	1230	|	290	279	316	||	0	-2.18266	0.218624	10.8356	0.0363243	||	0	-1.51514	0.0576977	10.8356	0.000233514
Nhej1	1:74967500-74968912	1412	0	0	0	|	3	0	0	||	4	5	10	|	7	4	1	||	0	6.56644	0.218624	5.56804	0.0363549	||	0	-0.620197	0.998613	5.56804	0.431759
Slc25a30	14:75770171-75771533	1362	4	4	7	|	1	0	3	||	101	128	140	|	127	139	98	||	0	-1.65336	0.225294	9.10479	0.0375915	||	0	-0.0228903	0.999964	9.10479	0.93905
Gigyf2	1:87364104-87380008	15904	23	18	32	|	9	8	17	||	70	54	83	|	64	60	72	||	0	-0.851379	0.225884	9.65946	0.0378177	||	0	-0.0953681	0.998613	9.65946	0.76274
Sclt1	3:41727093-41734235	7142	0	0	0	|	0	0	3	||	7	15	29	|	8	9	18	||	0	6.44438	0.226342	6.46388	0.0380223	||	0	-0.514647	0.998613	6.46388	0.369159
Rad52	6:119920110-119921028	918	4	5	3	|	3	4	19	||	11	11	18	|	9	10	21	||	0	1.26665	0.228167	7.47169	0.0385453	||	0	-0.011547	0.999964	7.47169	0.980751
Fam20a	11:109682837-109685527	2690	0	0	0	|	3	0	0	||	12	51	9	|	58	84	19	||	0	6.58059	0.228167	7.59392	0.038587	||	0	1.14685	0.903042	7.59392	0.131594
Espl1	15:102299803-102304145	4342	0	0	0	|	1	2	0	||	2	3	0	|	2	6	1	||	0	6.60477	0.232283	5.09745	0.0395908	||	0	0.744846	0.998613	5.09745	0.462912
Vwa8	14:79009164-79026077	16913	1	0	0	|	4	0	2	||	202	229	115	|	270	226	117	||	0	2.79928	0.232283	9.52911	0.0396348	||	0	0.126842	0.998613	9.52911	0.785315
Milr1	11:106754782-106755051	269	0	0	0	|	0	0	4	||	1	2	6	|	0	7	15	||	0	6.71749	0.232283	5.60686	0.0396772	||	0	1.25537	0.958124	5.60686	0.269866
Mgat4a	1:37490260-37498740	8480	0	0	0	|	0	0	3	||	1	6	8	|	5	4	8	||	0	6.43225	0.233322	5.58511	0.0401032	||	0	0.182591	0.998613	5.58511	0.800016
Mertk	2:128736563-128738369	1806	6	1	0	|	4	6	6	||	44	35	49	|	38	46	74	||	0	1.4403	0.233322	8.18732	0.0401753	||	0	0.280084	0.998613	8.18732	0.4334
Zfp608	18:54946281-54946808	527	0	0	0	|	0	2	1	||	6	3	14	|	2	8	19	||	0	6.53011	0.233322	5.98804	0.0404633	||	0	0.333979	0.998613	5.98804	0.676411
Psd3	8:67882981-67908889	25908	6	6	5	|	3	5	26	||	63	90	109	|	83	52	81	||	0	1.1322	0.233322	9.06921	0.0405037	||	0	-0.285963	0.998613	9.06921	0.452027
Galnt18	7:111597803-111599123	1320	0	0	0	|	0	0	3	||	6	2	2	|	3	5	4	||	0	6.42983	0.233322	5.34348	0.0405382	||	0	0.208611	0.998613	5.34348	0.789416
Cntn3	6:102514164-102515609	1445	0	0	0	|	0	3	0	||	0	0	0	|	0	0	0	||	0	6.62176	0.233322	4.50394	0.0406466	||	0	0	1	4.50394	1
Ep400	5:110755397-110756766	1369	1	2	6	|	7	4	7	||	24	30	20	|	32	29	35	||	0	1.26946	0.23361	7.77409	0.040829	||	0	0.34649	0.96301	7.77409	0.290864
Srpk2	5:23540375-23548563	8188	0	0	0	|	0	0	3	||	12	22	76	|	17	20	35	||	0	6.42683	0.234313	7.26492	0.0410842	||	0	-0.556984	0.998613	7.26492	0.363485
Rere	4:150406196-150406664	468	3	0	0	|	0	3	7	||	20	25	35	|	24	25	11	||	0	1.92574	0.234435	7.24713	0.0412383	||	0	-0.404251	0.998613	7.24713	0.356175
not_annotated	10:11492129-11492170	41	0	0	0	|	0	3	0	||	1	1	1	|	3	4	0	||	0	6.63202	0.240003	4.9495	0.0423534	||	0	1.05593	0.998613	4.9495	0.356848
Gm45086	7:48724380-48726822	2442	21	15	17	|	13	2	7	||	18	24	43	|	25	17	20	||	0	-0.996469	0.252283	8.71752	0.0446632	||	0	-0.444439	0.958124	8.71752	0.282429
Evi5	5:107788199-107799260	11061	14	15	26	|	10	3	10	||	164	199	335	|	229	192	178	||	0	-0.985452	0.254288	10.1885	0.0452191	||	0	-0.209037	0.998613	10.1885	0.551714
Bard1	1:71046678-71053721	7043	0	0	0	|	0	0	3	||	0	3	1	|	2	5	3	||	0	6.40537	0.254288	5.08876	0.0453058	||	0	1.18774	0.911982	5.08876	0.216513
Arhgap5	12:52516079-52519967	3888	8	13	13	|	18	19	14	||	110	146	194	|	150	105	125	||	0	0.905619	0.254581	9.92706	0.0455021	||	0	-0.245931	0.998613	9.92706	0.46454
Dcaf6	1:165336745-165357546	20801	0	0	2	|	0	8	0	||	75	147	61	|	78	49	25	||	0	2.42631	0.259171	8.43139	0.0464691	||	0	-0.922275	0.911982	8.43139	0.174839
Spred2	11:19998120-20008477	10357	6	1	0	|	5	11	2	||	11	7	3	|	14	23	20	||	0	1.7124	0.267576	7.09614	0.0481274	||	0	1.36031	0.814996	7.09614	0.0501798
Fam126a	5:23980487-23983266	2779	3	1	3	|	0	0	1	||	19	28	22	|	20	21	32	||	0	-2.51784	0.275759	7.13788	0.0497551	||	0	0.0605132	0.998613	7.13788	0.865172
Alb	5:90469561-90472621	3060	0	1	13	|	0	0	4	||	7948	7960	8005	|	7904	7946	7990	||	0	-1.53707	0.279327	14.3494	0.0505568	||	0	-0.027606	0.998613	14.3494	0.901882
Uqcc1	2:155887109-155911836	24727	0	4	3	|	0	1	0	||	99	116	124	|	95	67	95	||	0	-2.50542	0.280144	8.74265	0.0508632	||	0	-0.418189	0.911982	8.74265	0.146657
Kansl1l	1:66801049-66807604	6555	1	1	5	|	0	0	1	||	21	33	34	|	15	13	24	||	0	-2.50755	0.282967	7.11692	0.0516839	||	0	-0.76327	0.78182	7.11692	0.0415674
Mllt10	2:18092784-18126229	33445	2	1	4	|	0	0	1	||	33	26	28	|	23	12	26	||	0	-2.51312	0.282967	7.18477	0.0516959	||	0	-0.541996	0.911982	7.18477	0.150324
Gm9762	3:78966402-78966775	373	2	1	4	|	1	0	0	||	10	20	16	|	14	18	22	||	0	-2.50023	0.284926	6.7769	0.0522149	||	0	0.217188	0.998613	6.7769	0.583706
Cers6	2:68934515-68947357	12842	1	0	2	|	1	3	5	||	43	38	55	|	58	53	112	||	0	1.82022	0.292518	8.22264	0.0538408	||	0	0.688345	0.814996	8.22264	0.0534914
Golim4	3:75894835-75898132	3297	0	0	2	|	3	0	4	||	56	59	79	|	60	52	52	||	0	2.03769	0.292518	8.17373	0.054927	||	0	-0.25084	0.998613	8.17373	0.355505
Cpq	15:33249926-33302547	52621	0	3	0	|	2	1	6	||	213	269	324	|	230	180	184	||	0	1.79109	0.292518	9.77047	0.0567233	||	0	-0.445949	0.911982	9.77047	0.16119
Fto	8:91468317-91485278	16961	3	0	0	|	0	0	0	||	42	57	55	|	49	60	49	||	0	-6.25426	0.292518	7.91968	0.0573611	||	0	0.0278479	0.998613	7.91968	0.920748
Ptbp3	4:59514274-59524476	10202	2	1	2	|	2	1	10	||	84	171	186	|	115	115	207	||	0	1.55408	0.292518	9.2817	0.0573974	||	0	-0.0127643	0.999964	9.2817	0.974468
Vps54	11:21263199-21264871	1672	0	3	0	|	0	0	0	||	45	61	47	|	40	35	40	||	0	-6.25464	0.292518	7.74422	0.0574363	||	0	-0.431422	0.911982	7.74422	0.141799
Cpsf6	10:117355935-117367988	12053	1	2	0	|	0	0	0	||	61	64	92	|	60	65	77	||	0	-6.25478	0.292518	8.26052	0.0574919	||	0	-0.109812	0.998613	8.26052	0.692231
Zmynd11	13:9710146-9735466	25320	2	0	1	|	0	0	0	||	41	44	49	|	38	53	54	||	0	-6.25034	0.292518	7.78856	0.0576789	||	0	0.100231	0.998613	7.78856	0.728617
Pias2	18:77133091-77150098	17007	0	3	0	|	0	0	0	||	51	74	54	|	60	70	57	||	0	-6.25573	0.292518	8.11022	0.0577673	||	0	0.0467018	0.998613	8.11022	0.876669
Map4k2	19:6341903-6343386	1483	0	3	0	|	0	0	0	||	16	19	16	|	18	22	15	||	0	-6.2559	0.292518	6.7047	0.0578225	||	0	0.092347	0.998613	6.7047	0.808669
Gtf2h1	7:46808537-46808879	342	1	2	0	|	0	0	0	||	54	98	84	|	68	59	57	||	0	-6.25588	0.292518	8.26484	0.0578302	||	0	-0.365427	0.923944	8.26484	0.224281
Fbxo42	4:141167713-141170940	3227	0	3	0	|	0	0	0	||	24	18	18	|	22	16	18	||	0	-6.25633	0.292518	6.8024	0.0579527	||	0	-0.127701	0.998613	6.8024	0.736767
Utp20	10:88809082-88810085	1003	3	0	0	|	0	0	0	||	29	32	37	|	35	33	19	||	0	-6.25675	0.292518	7.31639	0.0581434	||	0	-0.17869	0.998613	7.31639	0.614807
Vps13a	19:16759587-16766540	6953	0	3	0	|	0	0	0	||	28	37	60	|	28	20	18	||	0	-6.25779	0.292518	7.34064	0.0584112	||	0	-0.908416	0.443331	7.34064	0.0149953
Usp7	16:8701962-8703546	1584	0	0	3	|	0	0	0	||	91	105	113	|	97	78	101	||	0	-6.24108	0.292518	8.65547	0.0585329	||	0	-0.180593	0.998613	8.65547	0.513726
Lsm14a	7:34351286-34353847	2561	1	0	2	|	0	0	0	||	67	100	91	|	71	83	99	||	0	-6.24521	0.292518	8.49617	0.0585379	||	0	-0.0402245	0.998613	8.49617	0.891637
Fgb	3:83043777-83044305	528	1	0	0	|	0	3	2	||	7857	7829	7906	|	7847	7888	8086	||	0	2.5316	0.292518	14.3347	0.0585799	||	0	-0.0095983	0.999964	14.3347	0.960471
Fam3c	6:22339273-22343319	4046	1	2	0	|	0	0	0	||	40	63	84	|	62	50	98	||	0	-6.25836	0.292518	8.18852	0.058619	||	0	0.163394	0.998613	8.18852	0.639855
Vps13b	15:35533296-35534360	1064	0	3	0	|	0	0	0	||	37	81	86	|	63	42	40	||	0	-6.25906	0.292518	8.03948	0.05882	||	0	-0.485251	0.911982	8.03948	0.184108
Stat6	10:127646891-127648189	1298	3	0	0	|	0	0	0	||	79	56	50	|	60	72	100	||	0	-6.25892	0.292518	8.26794	0.0588534	||	0	0.280636	0.998613	8.26794	0.436364
Smchd1	17:71436706-71448846	12140	0	1	2	|	0	0	0	||	36	33	63	|	27	41	34	||	0	-6.24452	0.292518	7.57764	0.0589688	||	0	-0.363727	0.96301	7.57764	0.29084
Uvrag	7:99004580-99016674	12094	2	0	1	|	0	0	0	||	83	59	66	|	72	35	59	||	0	-6.25077	0.292518	8.13558	0.0589787	||	0	-0.366671	0.959488	8.13558	0.288172
Fbxo18	2:11760481-11763021	2540	0	0	3	|	0	0	0	||	49	60	83	|	45	25	47	||	0	-6.23949	0.292518	7.8956	0.0590142	||	0	-0.721591	0.562831	7.8956	0.0241941
Ccm2	11:6584520-6585217	697	1	0	0	|	2	1	2	||	27	35	38	|	31	26	34	||	0	2.53049	0.292518	7.41431	0.0590608	||	0	-0.148901	0.998613	7.41431	0.607553
Acer3	7:98251890-98266247	14357	1	2	0	|	0	0	0	||	53	66	69	|	52	37	102	||	0	-6.25989	0.292518	8.13975	0.0591223	||	0	-0.00416936	0.999964	8.13975	0.991197
Txndc11	16:11122670-11128703	6033	1	0	0	|	2	3	0	||	62	39	49	|	41	41	48	||	0	2.55566	0.292518	7.85982	0.059146	||	0	-0.237608	0.998613	7.85982	0.460956
Ubap2	4:41216566-41229848	13282	0	2	1	|	0	0	0	||	13	14	7	|	13	14	13	||	0	-6.25096	0.292518	6.33737	0.0591717	||	0	0.199971	0.998613	6.33737	0.661681
Dnajb6	5:29764399-29766395	1996	1	1	1	|	0	0	0	||	240	187	264	|	215	122	198	||	0	-6.25095	0.292518	9.54143	0.0593303	||	0	-0.397764	0.954941	9.54143	0.243056
Amfr	8:93999098-94000469	1371	2	1	0	|	0	0	0	||	307	203	245	|	236	121	202	||	0	-6.26104	0.292518	9.63358	0.0595441	||	0	-0.480147	0.911982	9.63358	0.206415
Vps13b	15:35417511-35423297	5786	0	0	3	|	0	0	0	||	57	91	128	|	70	81	79	||	0	-6.23737	0.292518	8.47529	0.059669	||	0	-0.250001	0.998613	8.47529	0.445474
Pum1	4:130727998-130730548	2550	0	1	2	|	0	0	0	||	44	24	38	|	40	22	40	||	0	-6.2433	0.292518	7.44898	0.0596994	||	0	-0.0916015	0.998613	7.44898	0.808733
Chmp3	6:71574115-71579836	5721	2	1	0	|	0	0	0	||	171	93	170	|	157	74	152	||	0	-6.26162	0.292518	9.05629	0.0597453	||	0	-0.217968	0.998613	9.05629	0.580263
Nvl	1:181120355-181123984	3629	1	0	2	|	0	0	0	||	35	38	67	|	29	30	58	||	0	-6.24302	0.292518	7.67965	0.0598353	||	0	-0.260413	0.998613	7.67965	0.486269
Eef2k	7:120891596-120892053	457	0	3	0	|	0	0	0	||	11	6	12	|	5	6	9	||	0	-6.2626	0.292518	5.9439	0.0600136	||	0	-0.539028	0.998613	5.9439	0.334687
Chsy1	7:66125242-66125737	495	3	0	0	|	0	0	0	||	22	19	9	|	17	14	18	||	0	-6.26229	0.292518	6.63874	0.0600191	||	0	-0.0779201	0.998613	6.63874	0.872174
Arhgef7	8:11785713-11800868	15155	0	0	3	|	0	0	0	||	26	60	38	|	42	55	61	||	0	-6.2355	0.292518	7.7969	0.0602531	||	0	0.337418	0.998613	7.7969	0.358326
Met	6:17487797-17492437	4640	0	0	2	|	1	5	1	||	63	172	96	|	105	123	77	||	0	2.11113	0.292518	8.83967	0.0603846	||	0	-0.118899	0.998613	8.83967	0.784128
Adnp2	18:80137484-80142769	5285	0	3	0	|	0	0	0	||	14	25	12	|	12	22	27	||	0	-6.26375	0.292518	6.76294	0.0604161	||	0	0.230596	0.998613	6.76294	0.638601
Spata1	3:146463185-146493843	30658	1	2	0	|	0	0	0	||	1	2	2	|	7	7	4	||	0	-6.26411	0.292518	5.36583	0.0605878	||	0	1.70512	0.52185	5.36583	0.0212518
Vprbp	9:106844136-106854294	10158	1	0	2	|	0	0	0	||	32	45	43	|	35	9	27	||	0	-6.24116	0.292518	7.34433	0.0609862	||	0	-0.778051	0.832304	7.34433	0.0715564
Srp68	11:116262860-116263297	437	1	0	0	|	2	0	3	||	41	46	62	|	43	59	51	||	0	2.52123	0.292518	7.93169	0.0611617	||	0	0.0349914	0.998613	7.93169	0.902286
Tmem50a	4:134909613-134913195	3582	2	0	0	|	1	3	3	||	351	347	389	|	386	289	375	||	0	2.03856	0.292518	10.2576	0.0611757	||	0	-0.0743908	0.998613	10.2576	0.81966
Mapkap1	2:34432003-34435222	3219	1	0	0	|	2	2	1	||	61	77	116	|	58	78	87	||	0	2.54467	0.292518	8.45671	0.0612701	||	0	-0.181525	0.998613	8.45671	0.571709
Akt2	7:27608623-27618319	9696	0	0	3	|	0	0	0	||	130	96	65	|	87	107	95	||	0	-6.23218	0.292518	8.66466	0.0613214	||	0	-0.058872	0.998613	8.66466	0.878107
Rangap1	15:81716567-81722026	5459	0	0	3	|	0	0	0	||	91	92	45	|	42	57	56	||	0	-6.23185	0.292518	8.17521	0.0614309	||	0	-0.601107	0.903042	8.17521	0.131098
Dennd5b	6:149080806-149084936	4130	2	0	0	|	2	2	3	||	74	125	90	|	108	82	61	||	0	2.03712	0.292518	8.64942	0.0614488	||	0	-0.217452	0.998613	8.64942	0.527328
Kdm3b	18:34793004-34799359	6355	1	2	0	|	0	0	0	||	32	13	13	|	25	11	22	||	0	-6.26687	0.292518	6.80788	0.0616147	||	0	-0.06903	0.998613	6.80788	0.897146
Rere	4:150431523-150439468	7945	1	1	0	|	3	1	3	||	20	35	45	|	33	22	16	||	0	2.03562	0.292518	7.35568	0.0616606	||	0	-0.484794	0.911982	7.35568	0.212269
Auh	13:52887241-52898736	11495	3	0	0	|	0	0	0	||	191	93	80	|	154	74	86	||	0	-6.26683	0.292518	8.85472	0.0617134	||	0	-0.286978	0.998613	8.85472	0.552797
Rb1	14:73262529-73269198	6669	0	0	1	|	0	3	2	||	10	19	15	|	11	17	16	||	0	2.53973	0.292549	6.59589	0.0620014	||	0	-0.0088639	0.999964	6.59589	0.983098
Gsap	5:21222390-21226833	4443	0	0	3	|	0	0	0	||	68	152	185	|	51	55	97	||	0	-6.22965	0.292549	8.68614	0.06216	||	0	-0.984265	0.474618	8.68614	0.0177177
Tbc1d5	17:50782261-50800195	17934	0	0	3	|	0	0	0	||	8	23	19	|	13	25	20	||	0	-6.22907	0.292549	6.71551	0.0623544	||	0	0.218777	0.998613	6.71551	0.649746
Stk39	2:68358814-68410141	51327	1	0	2	|	0	0	0	||	7	6	3	|	5	5	10	||	0	-6.23884	0.292549	5.68874	0.0624875	||	0	0.270707	0.998613	5.68874	0.663383
Tdp2	13:24838147-24840558	2411	1	0	0	|	2	1	2	||	36	48	71	|	42	27	53	||	0	2.53045	0.292549	7.82451	0.0625473	||	0	-0.349048	0.970337	7.82451	0.296714
Prkag2	5:24866079-24871659	5580	0	0	3	|	0	0	0	||	30	63	38	|	64	31	22	||	0	-6.22558	0.293877	7.64844	0.0635503	||	0	-0.180636	0.998613	7.64844	0.702029
Vwa8	14:78982236-78984302	2066	5	2	1	|	4	6	7	||	213	227	141	|	284	224	141	||	0	1.33053	0.293877	9.75407	0.0635829	||	0	0.12197	0.998613	9.75407	0.761101
Ccne2	4:11193926-11199431	5505	0	0	3	|	0	0	0	||	17	57	56	|	21	10	18	||	0	-6.22535	0.293877	7.25965	0.0636289	||	0	-1.38847	0.240302	7.25965	0.00552339
Arid1a	4:133719537-133723051	3514	2	10	5	|	1	4	0	||	15	21	11	|	16	26	25	||	0	-1.46305	0.293877	7.29998	0.0636755	||	0	0.480172	0.979392	7.29998	0.303067
Reps1	10:18092845-18094908	2063	0	0	3	|	0	0	0	||	13	19	29	|	28	46	15	||	0	-6.22456	0.293877	7.07677	0.0639075	||	0	0.565616	0.958124	7.07677	0.262076
Tm9sf3	19:41214041-41214105	64	0	1	0	|	0	3	2	||	222	230	324	|	221	209	317	||	0	2.53328	0.293877	9.82398	0.0641048	||	0	-0.0661356	0.998613	9.82398	0.841771
Anp32b	4:46460090-46463929	3839	0	0	3	|	0	0	0	||	23	48	12	|	44	57	59	||	0	-6.22393	0.293877	7.63177	0.0641266	||	0	0.904507	0.832304	7.63177	0.0670981
Fndc3a	14:72563484-72584844	21360	0	1	0	|	0	2	3	||	55	73	99	|	54	62	93	||	0	2.51874	0.293877	8.34828	0.064161	||	0	-0.121642	0.998613	8.34828	0.706439
Hecw2	1:53904249-53914632	10383	2	0	0	|	1	2	4	||	11	9	5	|	18	11	19	||	0	2.02151	0.294604	6.5136	0.0645075	||	0	0.882987	0.824381	6.5136	0.0625134
Rftn1	17:50047297-50055627	8330	0	0	3	|	0	0	0	||	15	8	6	|	6	9	8	||	0	-6.22246	0.294604	6.00686	0.064653	||	0	-0.369694	0.998613	6.00686	0.539688
Ccdc141	2:77089070-77108479	19409	0	1	0	|	2	0	3	||	23	42	31	|	28	25	17	||	0	2.51565	0.294895	7.26219	0.0648835	||	0	-0.46207	0.911982	7.26219	0.215304
Kansl2	15:98528863-98529453	590	2	3	4	|	0	0	2	||	31	29	39	|	48	24	27	||	0	-1.90887	0.298014	7.55651	0.0657383	||	0	-0.017915	0.999964	7.55651	0.95876
H6pd	4:149994469-149996381	1912	6	0	1	|	5	0	14	||	459	374	241	|	383	573	429	||	0	1.53814	0.29838	10.534	0.0660831	||	0	0.322384	0.998613	10.534	0.571559
Gatad2b	3:90341656-90341994	338	1	0	0	|	3	0	2	||	29	37	20	|	42	34	21	||	0	2.52855	0.29838	7.3784	0.0664587	||	0	0.142658	0.998613	7.3784	0.728488
Ilkap	1:91384565-91385346	781	4	3	7	|	2	0	2	||	87	39	82	|	88	50	76	||	0	-1.53886	0.29838	8.49634	0.0666391	||	0	0.00640887	0.999964	8.49634	0.986563
Ccdc171	4:83535790-83558030	22240	0	0	3	|	0	0	0	||	3	3	2	|	2	1	2	||	0	-6.216	0.29838	5.05515	0.0670478	||	0	-0.635812	0.998613	5.05515	0.467712
Socs7	11:97377936-97378711	775	0	0	1	|	3	0	2	||	13	8	7	|	14	6	12	||	0	2.53996	0.29838	6.23693	0.0679989	||	0	0.144282	0.998613	6.23693	0.786642
Traf3	12:111219811-111222397	2586	3	0	0	|	0	0	0	||	3	6	7	|	2	4	0	||	0	-6.28086	0.29838	5.3366	0.068081	||	0	-1.29674	0.911982	5.3366	0.146479
Ranbp9	13:43434814-43436142	1328	1	0	0	|	1	0	4	||	30	48	34	|	49	55	28	||	0	2.49748	0.29838	7.69419	0.0685792	||	0	0.226453	0.998613	7.69419	0.546241
Aagab	9:63616686-63619231	2545	4	1	2	|	8	0	6	||	43	47	54	|	32	30	35	||	0	1.24713	0.29838	7.97434	0.0685984	||	0	-0.58151	0.814996	7.97434	0.048759
Chuk	19:44084417-44088777	4360	2	3	4	|	0	0	2	||	107	154	245	|	163	120	128	||	0	-1.91276	0.29838	9.25889	0.0691062	||	0	-0.287866	0.998613	9.25889	0.396368
Tlk1	2:70738421-70786995	48574	1	0	8	|	0	2	0	||	47	59	66	|	48	56	57	||	0	-1.8676	0.29838	8.1246	0.069383	||	0	-0.103504	0.998613	8.1246	0.723476
Fgb	3:83042584-83042634	50	4	1	0	|	1	8	2	||	7157	7126	7373	|	7077	7291	7619	||	0	1.40187	0.29838	14.2246	0.0696118	||	0	-0.000559769	0.999964	14.2246	0.997884
Med12l	3:59031546-59042413	10867	3	0	0	|	0	0	0	||	5	4	3	|	0	4	4	||	0	-6.2838	0.29838	5.28482	0.0696911	||	0	-0.572062	0.998613	5.28482	0.532309
Nr1h4	10:89473752-89483524	9772	24	9	6	|	8	1	5	||	398	289	386	|	258	90	139	||	0	-1.25121	0.29838	10.2084	0.0699504	||	0	-1.17782	0.617651	10.2084	0.0293454
Zfp827	8:79118175-79136663	18488	1	2	1	|	0	3	10	||	0	4	3	|	2	7	7	||	0	1.81396	0.29838	6.00909	0.0706973	||	0	1.12778	0.911982	6.00909	0.18145
Kif23	9:61935380-61937535	2155	0	3	0	|	0	0	0	||	2	2	4	|	1	10	5	||	0	-6.28705	0.29838	5.39541	0.0710297	||	0	0.961359	0.976596	5.39541	0.300432
Stk3	15:35039664-35039741	77	0	0	3	|	2	1	6	||	3	1	4	|	3	3	4	||	0	1.80385	0.29838	5.66528	0.0710479	||	0	0.28608	0.998613	5.66528	0.70537
Evi5	5:107764676-107790508	25832	1	3	1	|	1	1	11	||	158	155	354	|	260	163	169	||	0	1.5134	0.29838	9.6824	0.0718369	||	0	-0.157144	0.998613	9.6824	0.719322
Taf4	2:179921152-179921967	815	0	4	5	|	0	2	0	||	22	26	16	|	24	21	20	||	0	-1.87403	0.29838	7.12252	0.0722693	||	0	-0.00621588	0.999964	7.12252	0.987227
Ahsg	16:22892233-22892315	82	3	2	0	|	7	0	4	||	7400	7661	7625	|	7311	7593	7748	||	0	1.38374	0.29838	14.2775	0.0723636	||	0	-0.0241602	0.998613	14.2775	0.904599
Hnrnpll	17:80044494-80053641	9147	8	7	2	|	2	0	4	||	52	60	66	|	66	31	55	||	0	-1.28681	0.29838	8.31898	0.0740066	||	0	-0.250105	0.998613	8.31898	0.469067
Adk	14:21234833-21240571	5738	43	14	27	|	11	3	25	||	2071	2055	2550	|	2288	1085	1410	||	0	-0.960336	0.29838	12.5759	0.0741815	||	0	-0.504245	0.958124	12.5759	0.271883
Zfp638	6:83954711-83957592	2881	1	0	2	|	0	7	1	||	61	59	85	|	57	54	60	||	0	1.69253	0.29838	8.26851	0.074282	||	0	-0.27022	0.998613	8.26851	0.369541
Ehbp1	11:22053432-22068506	15074	11	4	9	|	2	1	6	||	33	24	60	|	51	20	24	||	0	-1.19741	0.29838	8.07643	0.0744782	||	0	-0.300798	0.998613	8.07643	0.490557
Tmbim6	15:99401629-99402091	462	0	1	0	|	0	2	3	||	2322	1864	1110	|	1444	1375	1712	||	0	2.50653	0.29838	12.1913	0.0751355	||	0	-0.286054	0.998613	12.1913	0.51885
Satb1	17:51803431-51809287	5856	1	0	3	|	0	0	0	||	0	4	8	|	0	0	8	||	0	-6.58771	0.29838	5.31603	0.075205	||	0	-0.51938	0.998613	5.31603	0.703884
Setbp1	18:79086551-79087180	629	0	0	3	|	0	0	0	||	1	1	2	|	3	2	0	||	0	-6.19269	0.29838	4.90547	0.0771638	||	0	0.279527	0.998613	4.90547	0.792382
Epb41l2	10:25441573-25443954	2381	0	0	0	|	2	0	0	||	43	60	56	|	42	60	58	||	0	5.93309	0.29838	7.92966	0.0773247	||	0	-0.000994365	0.999964	7.92966	0.997244
Dock8	19:25051487-25065459	13972	0	0	0	|	0	2	0	||	14	16	14	|	9	13	10	||	0	5.93663	0.29838	6.33077	0.0773719	||	0	-0.466809	0.958124	6.33077	0.263782
Eif3l	15:79084112-79085711	1599	0	0	0	|	0	2	0	||	130	122	143	|	127	95	137	||	0	5.9368	0.29838	8.952	0.0773882	||	0	-0.162647	0.998613	8.952	0.568888
Nck1	9:100497258-100497970	712	0	0	0	|	2	0	0	||	55	81	102	|	72	51	75	||	0	5.93476	0.29838	8.28894	0.0775505	||	0	-0.269471	0.998613	8.28894	0.369452
Ccnt2	1:127791605-127799553	7948	0	0	0	|	1	1	0	||	46	63	42	|	35	29	23	||	0	5.9365	0.29838	7.59289	0.0775508	||	0	-0.814314	0.443331	7.59289	0.0150452
Crk	11:75692197-75692732	535	0	0	0	|	2	0	0	||	62	53	90	|	91	53	70	||	0	5.93605	0.29838	8.2448	0.0777261	||	0	0.0494203	0.998613	8.2448	0.876116
Senp1	15:98084970-98087133	2163	4	2	3	|	5	0	15	||	12	12	9	|	10	6	20	||	0	1.28702	0.29838	7.10264	0.0777755	||	0	0.0806811	0.998613	7.10264	0.886617
Stag1	9:100834418-100848738	14320	0	0	0	|	0	1	1	||	52	45	72	|	70	64	61	||	0	5.92445	0.29838	8.08066	0.0777929	||	0	0.197071	0.998613	8.08066	0.474279
Elf1	14:79536123-79536422	299	0	0	0	|	0	0	2	||	35	36	45	|	44	41	46	||	0	5.91779	0.29838	7.62404	0.0778474	||	0	0.160475	0.998613	7.62404	0.547367
Hspa4	11:53265924-53267118	1194	0	0	0	|	0	2	0	||	260	205	312	|	232	188	266	||	0	5.94162	0.29838	9.74856	0.0778679	||	0	-0.199869	0.998613	9.74856	0.540463
Ints8	4:11245724-11246146	422	0	0	0	|	1	0	1	||	25	25	33	|	21	21	31	||	0	5.92361	0.29838	7.09611	0.0778944	||	0	-0.198507	0.998613	7.09611	0.543203
Ecd	14:20329954-20338496	8542	0	0	0	|	0	0	2	||	32	43	41	|	46	41	44	||	0	5.91731	0.29838	7.62459	0.0779527	||	0	0.159748	0.998613	7.62459	0.5562
Kmt2a	9:44809715-44816659	6944	0	0	0	|	0	2	0	||	12	13	11	|	17	29	17	||	0	5.94292	0.29838	6.60702	0.0780001	||	0	0.783302	0.832304	6.60702	0.0746993
Trpm7	2:126797467-126799234	1767	0	0	0	|	0	2	0	||	40	74	107	|	75	65	47	||	0	5.94408	0.29838	8.20824	0.0781193	||	0	-0.220774	0.998613	8.20824	0.55013
Hp1bp3	4:138234243-138237307	3064	0	0	0	|	1	0	1	||	101	94	114	|	102	104	118	||	0	5.92341	0.29838	8.74194	0.078124	||	0	0.0499176	0.998613	8.74194	0.856008
Cdc73	1:143667625-143677855	10230	0	0	0	|	2	0	0	||	34	63	34	|	50	50	33	||	0	5.9402	0.29838	7.71208	0.078307	||	0	0.00439284	0.999964	7.71208	0.990752
Hltf	3:20072369-20076584	4215	0	0	0	|	0	2	0	||	13	19	40	|	19	20	23	||	0	5.94603	0.29838	6.91632	0.078322	||	0	-0.196531	0.998613	6.91632	0.650225
Rp2	X:20376881-20381819	4938	0	0	0	|	2	0	0	||	30	37	79	|	48	57	78	||	0	5.94062	0.29838	7.9512	0.0783671	||	0	0.340089	0.998613	7.9512	0.366109
Zfp280d	9:72307951-72312760	4809	0	0	0	|	0	2	0	||	13	33	29	|	22	41	31	||	0	5.94713	0.29838	7.18881	0.0784381	||	0	0.332445	0.998613	7.18881	0.438011
Birc2	9:7825615-7827009	1394	0	0	0	|	2	0	0	||	59	38	111	|	70	61	82	||	0	5.94169	0.29838	8.24549	0.0785209	||	0	0.039453	0.998613	8.24549	0.917318
Phf3	1:30852896-30863255	10359	0	0	0	|	0	0	2	||	12	16	20	|	12	15	13	||	0	5.91445	0.29838	6.47176	0.0785857	||	0	-0.265829	0.998613	6.47176	0.487532
Mbd1	18:74273735-74274773	1038	0	0	0	|	2	0	0	||	65	29	45	|	50	35	32	||	0	5.94231	0.29838	7.68134	0.0786119	||	0	-0.288102	0.998613	7.68134	0.473769
Wasf2	4:133184969-133185752	783	0	0	0	|	0	0	2	||	26	33	35	|	35	34	53	||	0	5.91387	0.29838	7.46582	0.0787141	||	0	0.357249	0.958124	7.46582	0.252186
Kansl1l	1:66772906-66778108	5202	0	0	0	|	0	0	2	||	27	34	50	|	31	32	27	||	0	5.91381	0.29838	7.38095	0.0787277	||	0	-0.299988	0.998613	7.38095	0.343297
Hbs1l	10:21299178-21307779	8601	0	0	0	|	1	0	1	||	118	88	81	|	114	100	109	||	0	5.92282	0.29838	8.70615	0.0788199	||	0	0.129247	0.998613	8.70615	0.682852
Helz	11:107632172-107635098	2926	0	0	0	|	0	0	2	||	14	19	20	|	16	18	26	||	0	5.91317	0.29838	6.73709	0.0788703	||	0	0.162978	0.998613	6.73709	0.656085
Bcl2l13	6:120870766-120876338	5572	0	0	0	|	0	0	2	||	60	45	55	|	66	42	54	||	0	5.91312	0.29838	7.93933	0.0788831	||	0	-0.011797	0.999964	7.93933	0.968467
Tmem164	X:142832501-142834393	1892	0	0	0	|	0	2	0	||	12	16	31	|	13	15	30	||	0	5.95157	0.29838	6.76784	0.0789162	||	0	-0.0190312	0.999964	6.76784	0.968363
Ube2i	17:25264766-25269479	4713	0	0	0	|	0	0	2	||	115	109	133	|	139	124	171	||	0	5.91221	0.29838	9.00405	0.079087	||	0	0.260169	0.998613	9.00405	0.354991
Asph	4:9508627-9532065	23438	0	0	0	|	0	0	2	||	64	84	62	|	34	32	50	||	0	5.91219	0.29838	7.95604	0.0790912	||	0	-0.88052	0.219487	7.95604	0.00447141
Ndufv2	17:66089232-66089493	261	0	0	0	|	2	0	0	||	646	825	981	|	726	464	885	||	0	5.94593	0.29838	11.1429	0.0791494	||	0	-0.25699	0.998613	11.1429	0.523388
Mau2	8:70023588-70033244	9656	0	0	0	|	2	0	0	||	16	13	11	|	27	11	13	||	0	5.94594	0.29838	6.51442	0.079151	||	0	0.306933	0.998613	6.51442	0.535389
Atf6	1:170787346-170794770	7424	0	0	0	|	0	0	2	||	98	113	90	|	92	82	100	||	0	5.91192	0.29838	8.62925	0.0791511	||	0	-0.164198	0.998613	8.62925	0.572019
Arhgap21	2:20855354-20860036	4682	0	0	0	|	2	0	0	||	22	32	12	|	24	30	19	||	0	5.94631	0.29838	6.98211	0.0792069	||	0	0.113212	0.998613	6.98211	0.808822
Rell1	5:63924735-63930535	5800	0	0	0	|	2	0	0	||	25	54	76	|	52	99	53	||	0	5.94665	0.29838	8.063	0.0792585	||	0	0.430216	0.998613	8.063	0.322214
Spopl	2:23506909-23545579	38670	0	0	0	|	0	2	0	||	15	13	35	|	19	8	21	||	0	5.9549	0.29838	6.70864	0.079285	||	0	-0.386102	0.998613	6.70864	0.447959
Eefsec	6:88355483-88358642	3159	4	8	5	|	2	1	3	||	34	30	20	|	33	26	21	||	0	-1.25518	0.29838	7.65159	0.0793919	||	0	-0.105836	0.998613	7.65159	0.774592
Chd2	7:73490479-73491424	945	0	0	0	|	0	0	2	||	45	46	53	|	36	62	42	||	0	5.91069	0.29838	7.79387	0.0794289	||	0	-0.0469688	0.998613	7.79387	0.885007
Atxn10	15:85386991-85393506	6515	0	0	0	|	0	0	2	||	87	118	81	|	131	107	118	||	0	5.91006	0.29838	8.7591	0.0795716	||	0	0.287214	0.998613	8.7591	0.347735
Cep350	1:155940717-155962560	21843	0	0	0	|	0	0	2	||	32	22	43	|	30	40	30	||	0	5.90974	0.29838	7.36388	0.079646	||	0	0.0395446	0.998613	7.36388	0.910351
Rhbdd1	1:82368292-82377704	9412	0	0	0	|	0	0	2	||	19	21	42	|	30	31	34	||	0	5.90944	0.29838	7.23153	0.0797135	||	0	0.21602	0.998613	7.23153	0.548513
Ick	9:78131295-78141273	9978	0	0	0	|	0	0	2	||	16	17	24	|	15	23	30	||	0	5.90899	0.29838	6.84725	0.0798162	||	0	0.24283	0.998613	6.84725	0.531469
Canx	11:50299129-50301054	1925	0	0	0	|	0	1	1	||	762	746	793	|	506	464	666	||	0	5.92369	0.29838	10.9766	0.0799611	||	0	-0.519778	0.911982	10.9766	0.155373
Kif2a	13:106982524-106988075	5551	0	0	0	|	1	1	0	||	11	27	8	|	13	21	15	||	0	5.95588	0.29838	6.56433	0.079984	||	0	0.068752	0.998613	6.56433	0.899618
Top2a	11:99009590-99010599	1009	0	0	0	|	2	0	0	||	22	66	92	|	35	57	31	||	0	5.95135	0.29838	7.85399	0.0799903	||	0	-0.503865	0.970337	7.85399	0.296919
Nvl	1:181109160-181123984	14824	0	0	0	|	0	1	1	||	19	50	53	|	28	42	55	||	0	5.92365	0.29838	7.61691	0.0800727	||	0	0.0448718	0.998613	7.61691	0.912614
Cdk19	10:40466638-40469955	3317	0	0	0	|	0	0	2	||	5	13	12	|	16	21	19	||	0	5.90772	0.29838	6.44715	0.0801056	||	0	0.882772	0.798052	6.44715	0.0435987
P2rx4	5:122714399-122719226	4827	0	0	0	|	0	0	2	||	51	49	87	|	81	122	108	||	0	5.90771	0.29838	8.45013	0.0801085	||	0	0.738556	0.596113	8.45013	0.0273106
Mtmr3	11:4546189-4549356	3167	0	0	0	|	0	0	2	||	6	9	9	|	15	9	9	||	0	5.90751	0.29838	6.0409	0.080154	||	0	0.434669	0.998613	6.0409	0.367005
P2rx4	5:122718313-122719226	913	0	0	0	|	0	0	2	||	63	71	113	|	93	142	114	||	0	5.90748	0.29838	8.66413	0.0801625	||	0	0.508122	0.903042	8.66413	0.12506
Lmbr1	5:29287391-29292949	5558	0	0	0	|	0	0	2	||	10	16	19	|	21	11	24	||	0	5.90672	0.29838	6.6106	0.0803366	||	0	0.298165	0.998613	6.6106	0.479931
Fcho2	13:98784776-98789873	5097	0	0	0	|	0	0	2	||	35	62	42	|	28	48	48	||	0	5.90661	0.29838	7.70195	0.0803612	||	0	-0.176546	0.998613	7.70195	0.625573
Ptbp3	4:59493186-59494610	1424	0	0	0	|	0	0	2	||	72	116	110	|	76	107	143	||	0	5.90636	0.29838	8.71827	0.08042	||	0	0.121287	0.998613	8.71827	0.720428
Cxcl1	5:90892824-90892912	88	3	0	0	|	0	3	17	||	14	4	32	|	8	53	843	||	0	2.66697	0.29838	9.40018	0.0808003	||	0	4.14555	0.205828	9.40018	0.00344185
Vps13b	15:35770456-35770863	407	0	0	0	|	0	0	2	||	16	37	39	|	20	31	26	||	0	5.90448	0.29838	7.18189	0.0808565	||	0	-0.244518	0.998613	7.18189	0.540834
Plbd1	6:136634431-136641214	6783	0	0	0	|	0	0	2	||	119	90	77	|	185	156	248	||	0	5.90413	0.29838	9.12905	0.0809368	||	0	0.99041	0.240302	9.12905	0.00547737
Dleu2	14:61632437-61644059	11622	0	0	0	|	0	2	0	||	13	14	44	|	5	10	17	||	0	5.96939	0.29838	6.62395	0.0810118	||	0	-1.10356	0.832304	6.62395	0.0729847
Arpc3	5:122404151-122405145	994	0	0	0	|	0	0	2	||	301	294	385	|	264	212	402	||	0	5.90288	0.29838	10.033	0.0812298	||	0	-0.180733	0.998613	10.033	0.611639
Dennd1a	2:38126529-38136975	10446	0	0	0	|	0	0	2	||	27	60	25	|	53	45	58	||	0	5.90197	0.29838	7.72235	0.0814435	||	0	0.446963	0.958124	7.72235	0.261177
Dock2	11:34501170-34503414	2244	0	0	0	|	0	1	1	||	9	10	14	|	8	19	30	||	0	5.92316	0.29838	6.49512	0.0815945	||	0	0.766953	0.911982	6.49512	0.147393
Rbm39	2:156177633-156178952	1319	0	0	0	|	0	0	2	||	41	78	133	|	95	89	121	||	0	5.9011	0.29838	8.56954	0.0816495	||	0	0.296204	0.998613	8.56954	0.440543
Sgms1	19:32159524-32160363	839	0	0	0	|	0	0	2	||	45	54	28	|	58	77	120	||	0	5.90097	0.29838	8.14188	0.0816802	||	0	0.958666	0.443823	8.14188	0.016066
Chchd6	6:89567587-89569412	1825	0	0	0	|	0	1	1	||	21	8	11	|	21	9	18	||	0	5.92311	0.29838	6.48119	0.0817696	||	0	0.203962	0.998613	6.48119	0.701091
Rfx7	9:72577039-72593360	16321	2	3	1	|	0	0	1	||	15	19	17	|	15	12	21	||	0	-2.30324	0.29838	6.74027	0.0818656	||	0	-0.106759	0.998613	6.74027	0.776418
Cdc42	4:137328713-137336129	7416	0	0	0	|	0	0	2	||	309	405	430	|	286	303	532	||	0	5.90001	0.29838	10.2757	0.0819072	||	0	-0.0461124	0.998613	10.2757	0.902939
Bmp2k	5:97027831-97045167	17336	0	0	0	|	0	0	2	||	14	14	9	|	13	17	29	||	0	5.89998	0.29838	6.56845	0.0819139	||	0	0.62738	0.911982	6.56845	0.184701
Baz2b	2:59932105-59936751	4646	0	0	0	|	0	0	2	||	8	15	12	|	18	32	16	||	0	5.89985	0.29838	6.62317	0.0819461	||	0	0.90304	0.814996	6.62317	0.0562805
Fip1l1	5:74540932-74557149	16217	1	5	0	|	0	0	1	||	54	54	41	|	59	56	48	||	0	-2.31047	0.29838	7.99591	0.0820387	||	0	0.0997128	0.998613	7.99591	0.750288
Zfp346	13:55113036-55122515	9479	0	0	0	|	0	0	2	||	2	5	4	|	5	4	6	||	0	5.89927	0.29838	5.39624	0.0820836	||	0	0.411593	0.998613	5.39624	0.526048
Cep83	10:94748941-94750659	1718	0	0	0	|	2	0	0	||	20	4	23	|	11	7	15	||	0	5.96375	0.29838	6.37577	0.0821007	||	0	-0.525021	0.998613	6.37577	0.414327
Susd1	4:59423995-59428064	4069	0	0	3	|	0	0	0	||	10	0	8	|	8	3	8	||	0	-6.18289	0.29838	5.7064	0.0822726	||	0	0.028261	0.999964	5.7064	0.975664
Slc43a1	2:84859689-84861499	1810	0	0	0	|	0	0	2	||	41	31	16	|	33	25	26	||	0	5.89812	0.29838	7.22344	0.0823581	||	0	-0.12243	0.998613	7.22344	0.78242
Ngly1	14:16290771-16294673	3902	1	5	0	|	0	0	1	||	61	77	121	|	66	53	67	||	0	-2.31283	0.298443	8.38392	0.0827617	||	0	-0.4735	0.903042	8.38392	0.136032
Pphln1	15:93452117-93465245	13128	0	0	0	|	1	0	1	||	15	20	12	|	9	22	39	||	0	5.91964	0.298443	6.78112	0.0828084	||	0	0.534929	0.998613	6.78112	0.323163
Kif15	9:122959117-122965986	6869	0	0	0	|	0	0	2	||	4	7	11	|	7	15	12	||	0	5.89595	0.298443	6.0236	0.0828821	||	0	0.621486	0.958124	6.0236	0.258842
Ubap2	4:41226280-41229848	3568	0	0	0	|	0	0	2	||	12	11	5	|	11	18	12	||	0	5.89483	0.298819	6.23802	0.0831555	||	0	0.506934	0.998613	6.23802	0.341235
Fbxo34	14:47500794-47509229	8435	0	0	0	|	0	0	2	||	3	3	2	|	9	10	5	||	0	5.89366	0.299232	5.55379	0.0834397	||	0	1.4887	0.578431	5.55379	0.0256272
Chd2	7:73501909-73503514	1605	1	1	1	|	1	2	5	||	30	43	64	|	54	65	51	||	0	1.64149	0.301506	8.03337	0.0842758	||	0	0.319401	0.986098	8.03337	0.308992
Bbx	16:50274547-50280539	5992	0	0	0	|	0	0	2	||	11	30	15	|	13	22	35	||	0	5.88972	0.301506	6.85768	0.084415	||	0	0.300539	0.998613	6.85768	0.559235
Cstf3	2:104608871-104609186	315	4	7	2	|	0	0	4	||	17	32	37	|	16	15	41	||	0	-1.52272	0.302325	7.45336	0.0848473	||	0	-0.261479	0.998613	7.45336	0.586506
Tom1l2	11:60270318-60275002	4684	1	0	0	|	0	2	3	||	36	13	11	|	14	31	16	||	0	2.49749	0.302325	6.94493	0.0849861	||	0	-0.031651	0.999964	6.94493	0.957808
Akr1c20	13:4507681-4514428	6747	10	11	15	|	6	1	6	||	852	1480	2147	|	886	245	1158	||	0	-1.21646	0.302825	11.7742	0.0856953	||	0	-0.975018	0.832304	11.7742	0.0725585
Aff3	1:38534906-38536946	2040	0	0	0	|	1	0	1	||	1	2	1	|	2	0	1	||	0	5.91726	0.302825	4.76313	0.0860836	||	0	-0.365576	0.998613	4.76313	0.72375
Smad4	18:73675161-73678039	2878	3	1	2	|	0	0	1	||	42	47	27	|	57	32	50	||	0	-2.30307	0.302825	7.76251	0.086125	||	0	0.215405	0.998613	7.76251	0.552011
Tfrc	16:32620366-32623435	3069	0	0	0	|	0	0	2	||	365	564	656	|	510	134	272	||	0	5.88281	0.302825	10.3907	0.0861658	||	0	-0.805381	0.898324	10.3907	0.111304
Arl13b	16:62827164-62830813	3649	1	1	10	|	2	0	1	||	20	13	41	|	55	39	27	||	0	-1.67063	0.302825	7.61961	0.0862294	||	0	0.717292	0.911982	7.61961	0.15779
Fanci	7:79433183-79438400	5217	0	0	0	|	0	2	0	||	1	1	4	|	7	1	2	||	0	6.00521	0.302825	5.09704	0.0863179	||	0	0.678289	0.998613	5.09704	0.490044
Fndc3b	3:27620605-27643089	22484	2	2	2	|	1	2	10	||	23	50	39	|	36	59	58	||	0	1.30566	0.302825	8.02263	0.0863256	||	0	0.445588	0.93462	8.02263	0.233969
Klf7	1:64078707-64079334	627	0	0	3	|	2	4	2	||	12	16	28	|	11	27	29	||	0	1.71411	0.303211	7.06568	0.0866072	||	0	0.268371	0.998613	7.06568	0.573041
Bbs9	9:22670785-22679064	8279	0	0	0	|	0	0	2	||	10	4	18	|	8	7	17	||	0	5.87959	0.303985	6.14533	0.0870002	||	0	-0.00509042	0.999964	6.14533	0.993372
Prim2	1:33512016-33533363	21347	0	0	0	|	0	0	2	||	3	20	24	|	22	13	16	||	0	5.8788	0.304113	6.57229	0.0872087	||	0	0.13918	0.998613	6.57229	0.814659
Prex1	2:166638315-166647045	8730	0	0	0	|	0	0	2	||	5	7	3	|	12	4	18	||	0	5.87636	0.305749	5.90129	0.0878511	||	0	1.09635	0.889603	5.90129	0.105761
Specc1	11:62146306-62161910	15604	0	0	0	|	0	0	2	||	4	3	1	|	4	4	10	||	0	5.87388	0.30745	5.40067	0.0885137	||	0	1.05655	0.911982	5.40067	0.171347
Erbin	13:103884143-103897928	13785	3	3	0	|	0	1	0	||	42	39	88	|	45	30	61	||	0	-2.30015	0.308103	7.94913	0.0888758	||	0	-0.310914	0.998613	7.94913	0.417933
Phkb	8:85875634-85879810	4176	3	3	0	|	0	0	1	||	17	48	40	|	11	19	27	||	0	-2.33297	0.310288	7.25015	0.0896818	||	0	-0.870665	0.832304	7.25015	0.0682325
Zfp609	9:65794622-65795495	873	0	1	2	|	1	6	1	||	14	5	11	|	10	14	9	||	0	1.74392	0.310402	6.45711	0.0898902	||	0	0.112774	0.998613	6.45711	0.845389
Serpina1b	12:103728208-103728258	50	0	3	3	|	0	1	0	||	3775	5674	6717	|	3525	5883	6311	||	0	-2.27814	0.311471	13.7677	0.090376	||	0	-0.0336299	0.998613	13.7677	0.916913
Trmt2b	X:134261577-134267561	5984	0	2	1	|	3	2	3	||	28	52	108	|	49	39	47	||	0	1.66566	0.31534	8.07792	0.0917801	||	0	-0.446514	0.958124	8.07792	0.270934
Mier1	4:103139358-103150628	11270	0	1	5	|	1	0	0	||	47	46	61	|	76	47	35	||	0	-2.26637	0.31534	7.98369	0.0918553	||	0	0.0246001	0.999964	7.98369	0.944757
Ercc6	14:32526149-32526878	729	0	0	0	|	0	0	2	||	7	4	23	|	4	9	18	||	0	5.85617	0.320301	6.15461	0.0934816	||	0	-0.10308	0.998613	6.15461	0.889323
Gtf2h1	7:46801672-46808879	7207	1	1	0	|	2	3	1	||	62	81	76	|	60	60	52	||	0	1.83189	0.330342	8.26836	0.0967225	||	0	-0.360201	0.911982	8.26836	0.19067
Tasp1	2:139977607-140057499	79892	2	3	0	|	6	2	3	||	22	11	30	|	24	25	48	||	0	1.39805	0.330342	7.45655	0.0967857	||	0	0.601566	0.911982	7.45655	0.18
Mtus1	8:41076232-41084840	8608	2	5	3	|	4	11	2	||	98	142	100	|	96	92	86	||	0	1.09089	0.330939	9.03745	0.0971479	||	0	-0.33216	0.998613	9.03745	0.350684
Fam208a	14:27438599-27442620	4021	2	2	0	|	3	2	4	||	46	42	66	|	41	36	42	||	0	1.41059	0.334913	7.94744	0.098504	||	0	-0.380012	0.911982	7.94744	0.173715
Hnrnpu	1:178331398-178331470	72	0	3	3	|	0	1	0	||	295	645	650	|	398	534	581	||	0	-2.27	0.337167	10.6886	0.0993575	||	0	-0.0607655	0.998613	10.6886	0.884734
Tmem56	3:121228310-121235764	7454	23	20	50	|	12	7	26	||	358	530	611	|	640	284	411	||	0	-0.814718	0.339873	11.1724	0.100347	||	0	-0.177488	0.998613	10.5735	0.687912
Fars2	13:36232122-36246494	14372	2	0	0	|	1	3	2	||	97	91	132	|	108	87	85	||	0	1.82436	0.3399	8.75429	0.100618	||	0	-0.201999	0.998613	8.75429	0.487043
Eif3a	19:60764032-60764233	201	3	3	3	|	0	4	14	||	106	70	162	|	91	112	156	||	0	1.15522	0.3399	9.13514	0.10074	||	0	0.0833232	0.998613	9.13514	0.842331
Fam160b1	19:57378549-57379175	626	8	2	12	|	2	2	5	||	44	31	44	|	36	43	26	||	0	-1.02728	0.340358	8.09794	0.101068	||	0	-0.193815	0.998613	8.09794	0.580737
Pzp	6:128494729-128494824	95	2	0	0	|	0	6	0	||	6174	7758	5137	|	4413	7774	4581	||	0	1.87341	0.34275	13.9563	0.101972	||	0	-0.202509	0.998613	13.9563	0.593902
Trpc6	9:8634047-8658377	24330	0	0	0	|	0	0	2	||	0	0	2	|	0	0	0	||	0	5.82776	0.34317	4.5283	0.102403	||	0	-1.90015	0.90296	4.5283	0.116956
Ankrd17	5:90298540-90304065	5525	2	0	0	|	0	4	2	||	62	103	91	|	94	88	68	||	0	1.82636	0.34317	8.55953	0.102485	||	0	-0.0396474	0.998613	8.55953	0.901037
Insr	8:3258383-3258934	551	4	2	5	|	5	2	13	||	116	157	77	|	159	150	110	||	0	1.06161	0.343709	9.29917	0.103669	||	0	0.224491	0.998613	9.29917	0.565562
Susd1	4:59420843-59428064	7221	0	0	0	|	0	0	2	||	4	0	4	|	2	0	3	||	0	5.82211	0.343709	4.99618	0.104337	||	0	-0.643878	0.998613	4.99618	0.549292
Dennd5b	6:149005166-149009900	4734	2	0	0	|	3	0	3	||	102	121	130	|	127	106	84	||	0	1.80989	0.343709	8.8824	0.104393	||	0	-0.16586	0.998613	8.8824	0.578671
Parpbp	10:88110299-88114701	4402	0	0	0	|	0	0	2	||	0	8	7	|	3	10	2	||	0	5.81921	0.343709	5.49935	0.10535	||	0	0.0564561	0.999964	5.49935	0.95507
Gm10925	1:24614436-24614605	169	0	6	4	|	2	0	1	||	5277	7085	7039	|	5345	6381	6834	||	0	-1.4685	0.343709	14.0207	0.105888	||	0	-0.0734411	0.998613	14.0207	0.754191
Esco1	18:10574875-10586041	11166	1	1	0	|	0	2	4	||	32	33	58	|	34	42	29	||	0	1.80035	0.343709	7.64958	0.10648	||	0	-0.220318	0.998613	7.64958	0.513231
Atxn10	15:85391638-85393506	1868	2	0	2	|	6	0	3	||	110	135	88	|	150	108	120	||	0	1.43026	0.343709	9.01572	0.106538	||	0	0.146858	0.998613	9.01572	0.661716
Dusp16	6:134758619-134761434	2815	5	1	2	|	0	0	2	||	39	89	56	|	45	51	26	||	0	-1.76174	0.343709	8.01898	0.107538	||	0	-0.592062	0.911982	8.01898	0.146326
Lima1	15:99819494-99826837	7343	1	2	1	|	3	0	6	||	40	39	38	|	33	51	53	||	0	1.39159	0.343709	7.87338	0.108599	||	0	0.206262	0.998613	7.87338	0.516775
Taok2	7:126878723-126879452	729	2	5	3	|	1	2	0	||	45	63	50	|	74	70	64	||	0	-1.46077	0.343709	8.27069	0.109208	||	0	0.37793	0.911982	8.27069	0.190041
Fh1	1:175614836-175614903	67	0	2	0	|	3	3	0	||	959	733	679	|	1338	934	606	||	0	1.88786	0.343709	11.3772	0.111684	||	0	0.239964	0.998613	11.3772	0.6207
Sugct	13:17644781-17672602	27821	2	1	0	|	0	4	5	||	11	49	49	|	19	95	120	||	0	1.76891	0.343709	8.1731	0.113631	||	0	1.12666	0.877121	8.1731	0.0987257
Etfa	9:55495562-55500164	4602	2	2	4	|	0	0	2	||	658	1011	1009	|	947	595	553	||	0	-1.74735	0.343709	11.24	0.114115	||	0	-0.36195	0.998613	11.24	0.367696
Mapkap1	2:34435133-34444406	9273	2	2	0	|	2	1	6	||	84	90	116	|	46	44	77	||	0	1.38261	0.343709	8.50845	0.114351	||	0	-0.809282	0.367758	8.50845	0.0114404
Spen	4:141516836-141522392	5556	1	0	5	|	0	1	0	||	19	6	8	|	13	9	10	||	0	-2.23198	0.343709	6.34773	0.114981	||	0	-0.0994361	0.998613	6.34773	0.870283
Mylk3	8:85352837-85355567	2730	0	0	0	|	0	0	2	||	2	1	6	|	0	0	5	||	0	5.79364	0.343709	5.02577	0.114986	||	0	-0.764552	0.998613	5.02577	0.519436
Zmym4	4:126923064-126926023	2959	1	1	6	|	2	0	0	||	17	24	40	|	28	19	29	||	0	-1.69557	0.343709	7.28105	0.115091	||	0	-0.0897244	0.998613	7.28105	0.816471
Slco1b2	6:141648489-141663820	15331	0	3	5	|	2	0	0	||	2682	3533	4009	|	2614	2036	2986	||	0	-1.70042	0.343709	12.9717	0.11531	||	0	-0.433152	0.911982	12.9717	0.186129
Bcl2l13	6:120870766-120876346	5580	6	7	4	|	0	0	7	||	58	43	56	|	65	41	52	||	0	-1.08177	0.343709	8.28828	0.115682	||	0	-0.019344	0.999964	8.28828	0.953247
Abraxas1	5:100805898-100812202	6304	0	6	0	|	0	0	1	||	3	18	22	|	7	21	21	||	0	-2.39225	0.343709	6.65893	0.117347	||	0	0.226511	0.998613	6.65893	0.774018
Ahsg	16:22899327-22899415	88	0	1	0	|	2	2	0	||	3762	4539	4619	|	3834	5061	4803	||	0	2.23102	0.343709	13.5249	0.118589	||	0	0.0741703	0.998613	13.5249	0.789632
Pkn2	3:142839208-142853714	14506	0	2	0	|	0	0	0	||	47	64	69	|	58	49	52	||	0	-5.67692	0.343709	7.99564	0.119855	||	0	-0.188512	0.998613	7.99564	0.473086
Uty	Y:1102765-1158634	55869	0	0	3	|	0	0	0	||	51	0	71	|	44	0	38	||	0	-6.13463	0.343709	7.40994	0.119864	||	0	-0.604551	0.998613	7.40994	0.671391
Srbd1	17:86098512-86109334	10822	1	1	0	|	0	0	0	||	37	51	57	|	18	20	18	||	0	-5.67709	0.343709	7.3856	0.119944	||	0	-1.36824	0.00343945	7.3856	9.72696e-06
Rps6kc1	1:190885334-190899571	14237	2	1	1	|	3	1	5	||	36	17	29	|	31	15	30	||	0	1.3945	0.343709	7.37543	0.120026	||	0	-0.148388	0.998613	7.37543	0.717929
Smg5	3:88346445-88349444	2999	0	0	1	|	2	0	2	||	30	29	27	|	33	44	39	||	0	2.21076	0.343709	7.46221	0.120054	||	0	0.409239	0.911982	7.46221	0.190083
Pum1	4:130718154-130728164	10010	2	0	0	|	0	0	0	||	70	57	65	|	63	53	55	||	0	-5.67736	0.343709	8.08461	0.120081	||	0	-0.191744	0.998613	8.08461	0.486935
S100pbp	4:129178241-129183717	5476	0	2	0	|	0	0	0	||	23	28	39	|	30	27	25	||	0	-5.67744	0.343709	7.20469	0.120082	||	0	-0.138394	0.998613	7.20469	0.662784
Bcl2l13	6:120862855-120865724	2869	2	0	0	|	0	0	0	||	36	33	36	|	42	33	29	||	0	-5.67744	0.343709	7.43624	0.120118	||	0	-0.033959	0.998613	7.43624	0.911687
Mlec	5:115150069-115150994	925	2	0	0	|	0	0	0	||	76	53	79	|	40	36	37	||	0	-5.67765	0.343709	7.93905	0.12021	||	0	-0.896756	0.179453	7.93905	0.00226384
Zfp871	17:32773505-32777527	4022	2	0	0	|	0	0	0	||	97	107	106	|	90	69	75	||	0	-5.67781	0.343709	8.56233	0.120286	||	0	-0.426168	0.903042	8.56233	0.124486
Rprd1a	18:24506834-24509922	3088	2	0	0	|	0	0	0	||	31	25	46	|	24	24	25	||	0	-5.67807	0.343709	7.22549	0.120402	||	0	-0.485462	0.911982	7.22549	0.148812
Map4k2	19:6341903-6342786	883	2	0	0	|	0	0	0	||	22	19	15	|	19	19	23	||	0	-5.67824	0.343709	6.78553	0.120482	||	0	0.0923666	0.998613	6.78553	0.802998
Atxn1	13:45697821-45956575	258754	2	0	0	|	0	0	0	||	37	64	48	|	26	20	31	||	0	-5.67846	0.343709	7.52289	0.120578	||	0	-0.964812	0.206983	7.52289	0.00398724
Pum2	12:8698091-8706041	7950	0	2	0	|	0	0	0	||	73	96	101	|	85	63	106	||	0	-5.67859	0.343709	8.5103	0.120588	||	0	-0.105712	0.998613	8.5103	0.723537
Mtm1	X:71231391-71234946	3555	0	2	0	|	0	0	0	||	16	20	23	|	15	21	28	||	0	-5.67864	0.343709	6.83132	0.12061	||	0	0.104487	0.998613	6.83132	0.779628
Cdk12	11:98219074-98231085	12011	0	2	0	|	0	0	0	||	18	23	40	|	28	28	29	||	0	-5.67879	0.343709	7.16021	0.120677	||	0	0.0730858	0.998613	7.16021	0.83669
Txlng	X:162790612-162811595	20983	1	0	1	|	0	0	0	||	48	55	59	|	61	35	62	||	0	-5.67315	0.343709	7.92607	0.120679	||	0	-0.0586035	0.998613	7.92607	0.840911
2700097O09Rik	12:55057242-55063109	5867	0	0	2	|	0	0	0	||	29	32	36	|	24	26	34	||	0	-5.66949	0.343709	7.26538	0.120728	||	0	-0.221695	0.998613	7.26538	0.471652
Ppm1d	11:85326864-85339796	12932	0	2	0	|	0	0	0	||	11	9	13	|	16	19	12	||	0	-5.67908	0.343709	6.37916	0.120805	||	0	0.491008	0.958124	6.37916	0.250239
Rnf138	18:21010677-21020999	10322	2	0	0	|	0	0	0	||	29	61	41	|	39	40	43	||	0	-5.67896	0.343709	7.65412	0.120807	||	0	-0.114482	0.998613	7.65412	0.734365
Usp32	11:85017630-85022905	5275	2	0	0	|	0	0	0	||	31	41	48	|	42	19	31	||	0	-5.67903	0.343709	7.44274	0.120843	||	0	-0.395442	0.958124	7.44274	0.257377
Csad	15:102185998-102188962	2964	2	0	0	|	0	0	0	||	52	41	56	|	44	79	64	||	0	-5.67917	0.343709	7.99344	0.120903	||	0	0.315369	0.998613	7.99344	0.342124
Map3k3	11:106096991-106123906	26915	0	0	2	|	0	0	0	||	21	19	20	|	32	24	36	||	0	-5.66898	0.343709	7.06743	0.120949	||	0	0.586476	0.832304	7.06743	0.0773948
Vps50	6:3516622-3524175	7553	0	0	2	|	0	0	0	||	38	36	48	|	46	29	48	||	0	-5.66896	0.343709	7.61193	0.120962	||	0	-0.007762	0.999964	7.61193	0.979268
Lmo4	3:144193896-144194503	607	0	0	2	|	0	0	0	||	14	11	13	|	26	22	32	||	0	-5.66891	0.343709	6.78603	0.12098	||	0	1.03758	0.206983	6.78603	0.00409752
Zcchc7	4:44893533-44895989	2456	0	2	0	|	0	0	0	||	28	41	51	|	20	33	39	||	0	-5.67949	0.343709	7.44394	0.120989	||	0	-0.380709	0.958124	7.44394	0.28722
Pum1	4:130768816-130774604	5788	0	1	1	|	0	0	0	||	50	58	35	|	58	54	61	||	0	-5.673	0.343709	7.92212	0.121034	||	0	0.239348	0.998613	7.92212	0.441427
Fut8	12:77364969-77365359	390	1	0	1	|	0	0	0	||	22	35	30	|	27	23	39	||	0	-5.67294	0.343709	7.23119	0.121073	||	0	0.0145806	0.999964	7.23119	0.966051
Tm9sf3	19:41245444-41256340	10896	0	2	0	|	0	0	0	||	267	279	300	|	235	178	270	||	0	-5.67979	0.343709	9.80156	0.121125	||	0	-0.334288	0.964536	9.80156	0.29187
Ern1	11:106421706-106423488	1782	2	0	0	|	0	0	0	||	52	32	34	|	23	20	23	||	0	-5.67967	0.343709	7.29952	0.121139	||	0	-0.871213	0.516783	7.29952	0.0207531
Ascc3	10:50767091-50767507	416	2	0	0	|	0	0	0	||	25	57	51	|	38	49	59	||	0	-5.67984	0.343709	7.76332	0.121218	||	0	0.133507	0.998613	7.76332	0.707933
Fam126a	5:23979488-24000019	20531	0	2	0	|	0	0	0	||	13	29	26	|	23	29	20	||	0	-5.68011	0.343709	6.9748	0.121271	||	0	0.083984	0.998613	6.9748	0.832416
Zcchc11	4:108491348-108495327	3979	0	2	0	|	0	0	0	||	54	69	105	|	66	98	61	||	0	-5.68014	0.343709	8.33835	0.121283	||	0	-0.00286334	0.999964	8.33835	0.993343
Dctn2	10:127275824-127278408	2584	2	0	0	|	0	0	0	||	192	176	168	|	226	163	152	||	0	-5.68005	0.343709	9.38392	0.121317	||	0	-0.0179558	0.999964	9.38392	0.95676
Dtnb	12:3617606-3644022	26416	2	0	0	|	0	0	0	||	46	34	29	|	48	29	31	||	0	-5.68009	0.343709	7.48547	0.121334	||	0	-0.0554497	0.998613	7.48547	0.882073
Trim33	3:103310309-103311513	1204	0	0	2	|	0	0	0	||	15	25	22	|	31	21	24	||	0	-5.66802	0.343709	6.9564	0.121372	||	0	0.276678	0.998613	6.9564	0.433224
Zfp277	12:40363134-40378874	15740	2	0	0	|	0	0	0	||	34	71	45	|	41	23	38	||	0	-5.68037	0.343709	7.64816	0.121464	||	0	-0.575339	0.903042	7.64816	0.125343
Vps13b	15:35668701-35709813	41112	0	2	0	|	0	0	0	||	26	62	58	|	35	47	32	||	0	-5.68056	0.343709	7.6821	0.121479	||	0	-0.344194	0.998613	7.6821	0.357896
Arid1b	17:5097574-5127024	29450	1	0	1	|	0	0	0	||	8	8	15	|	22	16	14	||	0	-5.67268	0.343709	6.40922	0.121563	||	0	0.727842	0.861274	6.40922	0.0912981
Rabgap1	2:37469377-37475466	6089	0	0	2	|	0	0	0	||	31	49	51	|	30	21	39	||	0	-5.6675	0.343709	7.48923	0.121598	||	0	-0.550778	0.870401	7.48923	0.0961039
Tns3	11:8478225-8479665	1440	2	1	7	|	1	2	0	||	22	36	39	|	31	44	52	||	0	-1.4348	0.343709	7.72992	0.121748	||	0	0.382934	0.958124	7.72992	0.270361
Eif4e	3:138546321-138555491	9170	1	0	1	|	0	0	0	||	50	73	93	|	64	56	106	||	0	-5.67256	0.343709	8.30141	0.121799	||	0	0.0582531	0.998613	8.30141	0.86216
Heatr5a	12:51921338-51925173	3835	0	0	2	|	0	0	0	||	13	11	18	|	13	18	22	||	0	-5.66699	0.343709	6.55215	0.121825	||	0	0.319699	0.998613	6.55215	0.426371
Fkbp15	4:62329348-62336547	7199	0	0	2	|	0	0	0	||	28	31	40	|	24	43	39	||	0	-5.66694	0.343709	7.40911	0.121843	||	0	0.0937626	0.998613	7.40911	0.784378
Ube2v2	16:15577015-15581207	4192	2	0	0	|	0	0	0	||	28	49	76	|	41	34	66	||	0	-5.68121	0.343709	7.8147	0.121866	||	0	-0.110323	0.998613	7.8147	0.77628
Pias1	9:62902759-62920548	17789	0	2	0	|	0	0	0	||	19	43	51	|	26	37	49	||	0	-5.68142	0.343709	7.50781	0.121874	||	0	-0.00340058	0.999964	7.50781	0.993138
Ehmt1	2:24813527-24863908	50381	0	0	2	|	0	0	0	||	37	26	25	|	25	27	28	||	0	-5.66684	0.343709	7.19095	0.121891	||	0	-0.169181	0.998613	7.19095	0.635155
Tmem41b	7:109978710-109981117	2407	0	2	0	|	0	0	0	||	31	55	83	|	24	27	46	||	0	-5.68146	0.343709	7.69791	0.121895	||	0	-0.786241	0.814996	7.69791	0.0480775
Dnajc1	2:18284623-18294044	9421	0	0	2	|	0	0	0	||	38	56	76	|	43	37	64	||	0	-5.6668	0.343709	7.8958	0.121908	||	0	-0.241633	0.998613	7.8958	0.457282
Cnot4	6:35064898-35080226	15328	0	0	2	|	0	0	0	||	18	27	18	|	15	20	15	||	0	-5.66673	0.343709	6.74519	0.121938	||	0	-0.345639	0.998613	6.74519	0.374261
Lrba	3:86291427-86304733	13306	0	0	2	|	0	0	0	||	42	58	96	|	52	46	41	||	0	-5.66673	0.343709	7.97174	0.121939	||	0	-0.482337	0.907351	7.97174	0.13754
Nptn	9:58640669-58643802	3133	0	2	0	|	0	0	0	||	100	173	181	|	112	138	222	||	0	-5.68156	0.343709	9.18768	0.12194	||	0	0.05165	0.998613	9.18768	0.888581
Pcm1	8:41274995-41290892	15897	0	2	0	|	0	0	0	||	26	34	24	|	28	60	35	||	0	-5.68163	0.343709	7.43123	0.121972	||	0	0.535927	0.911982	7.43123	0.1914
Vps13c	9:67852491-67860885	8394	2	0	0	|	0	0	0	||	65	108	113	|	78	45	116	||	0	-5.68151	0.343709	8.50663	0.122006	||	0	-0.274239	0.998613	8.50663	0.47093
Snd1	6:28526053-28545598	19545	2	0	0	|	0	0	0	||	251	194	155	|	160	207	210	||	0	-5.68153	0.343709	9.49987	0.122019	||	0	-0.0999061	0.998613	9.49987	0.786948
Zranb1	7:132948044-132966694	18650	0	2	0	|	0	0	0	||	49	46	99	|	87	47	44	||	0	-5.68174	0.343709	8.0968	0.122024	||	0	-0.117367	0.998613	8.0968	0.763345
Mtdh	15:34114024-34118110	4086	0	0	2	|	0	0	0	||	123	104	108	|	136	87	109	||	0	-5.66649	0.343709	8.80557	0.122045	||	0	-0.0475067	0.998613	8.80557	0.877811
Usp32	11:85077265-85083894	6629	0	0	2	|	0	0	0	||	14	24	23	|	23	19	13	||	0	-5.66642	0.343709	6.76634	0.122074	||	0	-0.153735	0.998613	6.76634	0.693614
Mad1l1	5:140302915-140303697	782	1	1	0	|	0	0	0	||	8	7	15	|	10	19	20	||	0	-5.68178	0.343709	6.3607	0.122089	||	0	0.695889	0.911982	6.3607	0.151048
Kiz	2:146935803-146942979	7176	1	0	0	|	1	1	2	||	17	28	26	|	38	28	24	||	0	2.20642	0.343709	7.20226	0.122145	||	0	0.328975	0.998613	7.20226	0.341756
Dcaf6	1:165420111-165429315	9204	0	2	0	|	0	0	0	||	45	86	95	|	121	72	56	||	0	-5.68201	0.343709	8.38991	0.122154	||	0	0.143746	0.998613	8.38991	0.712849
Rabgap1l	1:160627215-160645401	18186	0	2	0	|	0	0	0	||	36	44	104	|	61	49	38	||	0	-5.68217	0.343709	7.95798	0.122225	||	0	-0.286091	0.998613	7.95798	0.478219
Smad4	18:73662658-73678039	15381	0	2	0	|	0	0	0	||	36	20	30	|	51	21	31	||	0	-5.6822	0.343709	7.31846	0.122242	||	0	0.219781	0.998613	7.31846	0.605508
Wdr1	5:38545674-38547091	1417	0	2	0	|	0	0	0	||	117	89	102	|	98	88	207	||	0	-5.68242	0.343709	8.86206	0.122345	||	0	0.307622	0.998613	8.86206	0.434688
Ulk2	11:61787429-61791583	4154	0	0	2	|	0	0	0	||	56	112	113	|	52	34	56	||	0	-5.66548	0.343709	8.24887	0.122491	||	0	-0.985767	0.206983	8.24887	0.00393787
Adam10	9:70740075-70746326	6251	2	0	0	|	0	0	0	||	34	81	91	|	57	75	118	||	0	-5.68253	0.343709	8.33752	0.122503	||	0	0.28707	0.998613	8.33752	0.481823
Dennd4a	9:64835954-64873139	37185	0	0	2	|	0	0	0	||	24	38	43	|	29	49	29	||	0	-5.66516	0.343709	7.44742	0.122636	||	0	0.0351888	0.998613	7.44742	0.924064
Slc30a7	3:115978644-115993039	14395	0	0	2	|	0	0	0	||	30	67	76	|	53	62	75	||	0	-5.66509	0.343709	8.06764	0.122667	||	0	0.143308	0.998613	8.06764	0.680783
DHRSX	GL456216.1:31059-34831	3772	2	0	0	|	0	0	0	||	52	24	26	|	42	24	32	||	0	-5.68297	0.343709	7.39486	0.122718	||	0	-0.115772	0.998613	7.39486	0.794039
Vps13b	15:35533296-35576526	43230	0	2	0	|	0	0	0	||	35	91	59	|	62	44	27	||	0	-5.68322	0.343709	7.92148	0.122725	||	0	-0.477982	0.958124	7.92148	0.265409
Trappc9	15:72999972-73031643	31671	1	0	0	|	0	2	2	||	14	22	18	|	17	21	13	||	0	2.20712	0.343709	6.74878	0.122726	||	0	-0.0907568	0.998613	6.74878	0.815557
Ahctf1	1:179784090-179786131	2041	1	1	0	|	0	0	0	||	52	90	85	|	82	37	27	||	0	-5.68314	0.343709	8.10665	0.122743	||	0	-0.642256	0.903042	8.10665	0.13193
Atp9a	2:168705123-168710976	5853	2	0	0	|	0	0	0	||	92	45	40	|	82	88	68	||	0	-5.68303	0.343709	8.25603	0.122746	||	0	0.370021	0.998613	8.25603	0.380744
Lamp2	X:38430918-38442140	11222	0	2	0	|	0	0	0	||	1446	1832	1721	|	1346	887	1763	||	0	-5.68337	0.343709	12.0404	0.122798	||	0	-0.351934	0.998613	12.0404	0.38279
Xpo1	11:23261835-23271205	9370	0	2	0	|	0	0	0	||	29	44	80	|	25	39	64	||	0	-5.68362	0.343709	7.76225	0.122921	||	0	-0.240275	0.998613	7.76225	0.585627
Arid4a	12:71019374-71023590	4216	0	0	2	|	0	0	0	||	23	18	41	|	46	28	30	||	0	-5.66445	0.343709	7.28904	0.122956	||	0	0.337993	0.998613	7.28904	0.382566
Nelfb	2:25203141-25206345	3204	0	2	0	|	0	0	0	||	39	16	20	|	22	32	34	||	0	-5.6837	0.343709	7.16169	0.122958	||	0	0.181271	0.998613	7.16169	0.696095
Fgfr2	7:130218998-130241277	22279	0	2	0	|	0	0	0	||	36	42	52	|	48	34	115	||	0	-5.68374	0.343709	7.94477	0.122975	||	0	0.57145	0.911982	7.94477	0.194523
Trim35	14:66303181-66304235	1054	0	2	0	|	0	0	0	||	24	9	21	|	16	24	33	||	0	-5.68376	0.343709	6.87204	0.122988	||	0	0.402369	0.998613	6.87204	0.402374
Adam10	9:70703287-70754325	51038	0	0	2	|	0	0	0	||	25	61	35	|	55	76	65	||	0	-5.66407	0.343709	7.91932	0.123126	||	0	0.684947	0.832304	7.91932	0.0652421
Ccnf	17:24224908-24226783	1875	0	0	2	|	0	0	0	||	7	9	8	|	4	8	8	||	0	-5.66391	0.343709	5.81153	0.1232	||	0	-0.268581	0.998613	5.81153	0.614564
Dennd1b	1:139053346-139062971	9625	2	0	3	|	3	0	7	||	31	38	44	|	40	34	52	||	0	1.23035	0.343709	7.83628	0.123232	||	0	0.141384	0.998613	7.83628	0.638213
Atp6v1c1	15:38679320-38681165	1845	0	0	2	|	0	0	0	||	135	117	98	|	154	90	85	||	0	-5.66343	0.343709	8.83166	0.123414	||	0	-0.130479	0.998613	8.83166	0.717592
Ywhae	11:75751881-75759428	7547	0	1	1	|	0	0	0	||	291	352	179	|	270	262	357	||	0	-5.67176	0.343709	9.94778	0.123522	||	0	0.0650179	0.998613	9.94778	0.867963
Hbs1l	10:21304530-21307779	3249	1	0	0	|	2	0	2	||	108	89	80	|	99	104	106	||	0	2.20463	0.343709	8.69687	0.123552	||	0	0.122705	0.998613	8.69687	0.688477
Arhgap10	8:77351614-77365160	13546	0	2	0	|	0	0	0	||	15	18	10	|	11	10	27	||	0	-5.68522	0.343709	6.51224	0.123705	||	0	0.112122	0.998613	6.51224	0.832131
Tnrc6b	15:80747406-80784806	37400	2	0	0	|	0	0	0	||	32	26	42	|	41	30	10	||	0	-5.68518	0.343709	7.26857	0.123827	||	0	-0.305046	0.998613	7.26857	0.537097
Rbms1	2:60779731-60797742	18011	0	1	4	|	1	4	5	||	46	63	70	|	79	107	129	||	0	1.25644	0.343709	8.62291	0.123836	||	0	0.806428	0.379215	8.62291	0.0120113
Nucks1	1:131928064-131929762	1698	0	0	2	|	0	0	0	||	223	143	165	|	231	124	152	||	0	-5.66186	0.343991	9.33957	0.124133	||	0	-0.113141	0.998613	9.33957	0.766041
Prim2	1:33628395-33630433	2038	1	0	0	|	1	0	3	||	10	18	18	|	21	13	21	||	0	2.19408	0.344324	6.69835	0.124632	||	0	0.241564	0.998613	6.69835	0.533851
Cep128	12:91347526-91348876	1350	0	2	0	|	0	0	0	||	0	1	2	|	4	5	6	||	0	-5.68734	0.344324	5.16386	0.124775	||	0	2.08086	0.443331	5.16386	0.0146312
Ndrg2	14:51905950-51906020	70	9	0	2	|	0	3	0	||	1629	1841	1629	|	1222	818	596	||	0	-1.57419	0.344324	11.8853	0.124988	||	0	-0.975657	0.832304	11.8853	0.0718586
Dbnl	11:5791792-5794311	2519	2	0	0	|	0	0	0	||	54	35	43	|	31	30	111	||	0	-5.68767	0.344324	7.86828	0.125129	||	0	0.326363	0.998613	7.86828	0.536449
Cnot6l	5:96106216-96134132	27916	1	0	0	|	1	0	3	||	42	65	51	|	40	54	35	||	0	2.19309	0.344324	7.86026	0.125289	||	0	-0.299435	0.998613	7.86026	0.355126
Specc1	11:62029253-62043075	13822	1	0	1	|	0	0	0	||	2	1	4	|	5	2	4	||	0	-5.67064	0.344324	5.16251	0.125633	||	0	0.592615	0.998613	5.16251	0.441325
Osbpl1a	18:12871078-12898301	27223	0	0	2	|	0	0	0	||	4	18	11	|	15	20	17	||	0	-5.65851	0.344324	6.4356	0.125691	||	0	0.646541	0.911982	6.4356	0.214166
Epn1	7:5089919-5090168	249	0	0	2	|	0	0	0	||	131	88	63	|	140	83	61	||	0	-5.6579	0.344324	8.62203	0.125978	||	0	-0.047569	0.998613	8.62203	0.915055
Casp8	1:58823915-58833774	9859	2	1	7	|	1	9	7	||	116	123	139	|	91	175	207	||	0	1.06318	0.344324	9.36122	0.12623	||	0	0.310294	0.998613	9.36122	0.4543
Pag1	3:9749456-9752486	3030	2	0	0	|	0	0	0	||	3	4	3	|	0	2	2	||	0	-5.69003	0.344324	5.03548	0.126416	||	0	-1.19918	0.911982	5.03548	0.176537
2700049A03Rik	12:71216042-71219299	3257	0	0	2	|	0	0	0	||	2	3	4	|	3	3	6	||	0	-5.65692	0.344324	5.25486	0.126447	||	0	0.377339	0.998613	5.25486	0.60264
Slc44a1	4:53481464-53491530	10066	1	0	0	|	0	1	3	||	37	61	47	|	37	40	22	||	0	2.19117	0.344324	7.67373	0.127241	||	0	-0.554913	0.903042	7.67373	0.117568
Pzp	6:128486118-128487490	1372	1	8	5	|	0	2	3	||	3472	5622	4695	|	2791	6213	4623	||	0	-1.24234	0.344324	13.5796	0.127327	||	0	-0.0147021	0.999964	13.5796	0.969718
Ascc2	11:4649740-4656336	6596	0	0	2	|	0	0	0	||	13	20	10	|	9	24	31	||	0	-5.65504	0.344324	6.68539	0.127352	||	0	0.538983	0.998613	6.68539	0.320751
Csnk1g1	9:65958329-65958721	392	0	0	2	|	0	0	0	||	3	12	21	|	16	21	27	||	0	-5.65499	0.344324	6.59594	0.127376	||	0	0.844749	0.903042	6.59594	0.125405
Zfyve9	4:108717789-108727545	9756	0	1	0	|	2	0	2	||	13	15	12	|	23	13	10	||	0	2.20213	0.344324	6.54483	0.127482	||	0	0.17534	0.998613	6.54483	0.697578
Atxn2	5:121802081-121803080	999	2	3	3	|	5	3	6	||	7	10	9	|	16	29	15	||	0	1.0604	0.344324	7.06164	0.127564	||	0	1.18057	0.276361	7.06164	0.00750302
Utp11	4:124682193-124683855	1662	1	0	0	|	0	0	4	||	52	50	78	|	54	32	62	||	0	2.18034	0.344324	8.00053	0.127937	||	0	-0.29607	0.998613	8.00053	0.359255
Pwwp2a	11:43704534-43705477	943	0	2	0	|	5	0	1	||	6	8	18	|	3	6	4	||	0	1.85505	0.344324	6.05667	0.127953	||	0	-1.22954	0.832304	6.05667	0.0775381
Rsrp1	4:134924427-134924482	55	2	4	2	|	0	2	0	||	263	379	270	|	372	210	129	||	0	-1.70917	0.344976	9.93948	0.128544	||	0	-0.382302	0.998613	9.93948	0.39132
Mcu	10:59599928-59600693	765	2	0	0	|	0	0	0	||	4	1	9	|	3	7	7	||	0	-5.69395	0.344976	5.52283	0.12869	||	0	0.283318	0.998613	5.52283	0.717088
Prdm2	4:143170036-143194734	24698	2	0	0	|	0	0	0	||	28	9	12	|	19	5	6	||	0	-5.69411	0.344976	6.37823	0.128781	||	0	-0.766561	0.958124	6.37823	0.275863
Kat6b	14:21516626-21517498	872	1	0	2	|	3	3	1	||	15	8	18	|	13	15	14	||	0	1.4996	0.345398	6.66374	0.129188	||	0	0.0221166	0.999964	6.66374	0.958756
Spen	4:141493396-141494398	1002	0	0	2	|	0	0	0	||	13	9	5	|	8	23	12	||	0	-5.65103	0.345398	6.2554	0.129329	||	0	0.625663	0.991275	6.2554	0.312565
Lrch3	16:32981828-32988481	6653	0	1	0	|	1	0	3	||	24	28	27	|	25	13	36	||	0	2.18645	0.346144	7.14386	0.129804	||	0	-0.122931	0.998613	7.14386	0.758267
Pgam5	5:110265512-110267265	1753	1	0	2	|	4	1	2	||	46	35	70	|	34	33	42	||	0	1.48142	0.348194	7.83531	0.13077	||	0	-0.474044	0.911982	7.83531	0.14342
Cmss1	16:57391609-57391666	57	2	0	0	|	4	1	1	||	452	469	243	|	949	439	243	||	0	1.86173	0.349174	10.5897	0.131743	||	0	0.433378	0.998613	10.5897	0.460339
Huwe1	X:151835224-151843155	7931	1	0	0	|	0	0	4	||	111	189	121	|	139	140	124	||	0	2.17253	0.349174	9.0897	0.131782	||	0	-0.0808907	0.998613	9.0897	0.808824
Rere	4:150468695-150477468	8773	1	0	0	|	0	0	4	||	13	32	33	|	25	24	25	||	0	2.17252	0.349174	7.13085	0.131788	||	0	-0.0716081	0.998613	7.13085	0.855122
Scaper	9:55807013-55859918	52905	2	6	4	|	1	0	3	||	6	32	34	|	19	16	20	||	0	-1.36426	0.349174	7.21411	0.132014	||	0	-0.364597	0.998613	7.21411	0.473691
Zgrf1	3:127567628-127573325	5697	1	1	0	|	0	0	0	||	1	1	3	|	1	8	2	||	0	-5.69971	0.349174	5.1038	0.132125	||	0	1.06639	0.958124	5.1038	0.269121
Sec63	10:42789300-42791291	1991	1	0	0	|	0	0	4	||	105	204	165	|	92	120	129	||	0	2.17094	0.349858	9.07063	0.132582	||	0	-0.478806	0.911982	9.07063	0.161999
Rn7sk	9:78175353-78175411	58	4	4	3	|	8	2	7	||	7015	6933	7273	|	6725	7017	7546	||	0	0.879407	0.350623	14.1939	0.13307	||	0	-0.0179167	0.998613	14.1939	0.928824
Tbc1d14	5:36571296-36572037	741	1	0	0	|	0	1	3	||	15	12	6	|	22	16	30	||	0	2.18211	0.352416	6.70826	0.13395	||	0	0.978584	0.756847	6.70826	0.0390845
Sec63	10:42789300-42797733	8433	2	0	0	|	0	0	6	||	84	192	202	|	97	159	128	||	0	1.73547	0.352793	9.16207	0.134293	||	0	-0.295356	0.998613	9.16207	0.480729
9930021J03Rik	19:29753600-29755017	1417	0	1	0	|	0	0	4	||	11	21	23	|	13	24	16	||	0	2.16564	0.354796	6.77076	0.135256	||	0	-0.0452091	0.998613	6.77076	0.918175
Apoa1	9:46229899-46229976	77	2	7	12	|	15	7	6	||	5557	6796	6752	|	5102	6843	7074	||	0	0.736762	0.359999	14.0557	0.137443	||	0	-0.0186462	0.999964	14.0557	0.945314
Gc	5:89457661-89457747	86	0	3	2	|	0	0	1	||	8121	8120	8125	|	7634	8074	8127	||	0	-2.03397	0.360267	14.358	0.137749	||	0	-0.0548428	0.998613	14.358	0.778452
Zfp148	16:33466855-33468183	1328	2	2	1	|	0	0	1	||	42	63	44	|	34	36	43	||	0	-2.04078	0.364315	7.77341	0.139503	||	0	-0.418246	0.911982	7.77341	0.173585
Etv6	6:134066307-134066465	158	3	3	2	|	0	2	0	||	48	18	17	|	28	11	30	||	0	-1.70296	0.365896	7.27728	0.140316	||	0	-0.347633	0.998613	7.27728	0.528709
Gpc3	X:52428440-52429134	694	2	0	0	|	3	0	3	||	38	115	68	|	213	633	618	||	0	1.78831	0.367249	9.96623	0.141042	||	0	2.72848	0.0012127	9.96623	2.74367e-06
CT010460.1	12:71431207-71436739	5532	4	0	12	|	4	0	1	||	26	25	29	|	35	13	10	||	0	-1.31503	0.368309	7.4306	0.141657	||	0	-0.48326	0.998613	7.4306	0.417902
Stk4	2:164096739-164100596	3857	0	1	4	|	0	0	1	||	50	43	37	|	52	43	50	||	0	-2.02705	0.368468	7.82918	0.142316	||	0	0.123568	0.998613	7.82918	0.683408
Itm2b	14:73364574-73364684	110	2	1	0	|	0	5	2	||	3324	2820	2915	|	2586	1804	2060	||	0	1.47964	0.368468	12.7983	0.142318	||	0	-0.525543	0.911982	12.7983	0.140101
Cwf19l2	9:3441055-3460131	19076	0	0	3	|	0	3	4	||	18	35	47	|	32	25	46	||	0	1.46863	0.368468	7.55397	0.142391	||	0	0.0443184	0.998613	7.55397	0.909103
Zfp983	17:21652267-21680124	27857	1	1	3	|	0	0	1	||	14	10	22	|	19	16	21	||	0	-2.03178	0.368468	6.73654	0.142552	||	0	0.270412	0.998613	6.73654	0.485626
Cnot4	6:35077981-35080226	2245	3	3	5	|	1	0	3	||	25	26	34	|	28	29	31	||	0	-1.20369	0.368986	7.50529	0.142961	||	0	0.0377371	0.998613	7.50529	0.898785
Cops2	2:125833724-125836239	2515	0	2	3	|	0	0	1	||	110	126	199	|	122	109	135	||	0	-2.03201	0.369911	9.0541	0.143544	||	0	-0.247665	0.998613	9.0541	0.411176
Dock1	7:134874058-134876315	2257	1	2	0	|	1	0	6	||	30	27	39	|	42	35	58	||	0	1.42924	0.369911	7.70138	0.143905	||	0	0.470988	0.911982	7.70138	0.142886
Zmynd11	13:9720773-9735466	14693	1	1	3	|	1	0	0	||	50	69	46	|	51	55	62	||	0	-2.02092	0.369911	8.04855	0.143947	||	0	0.000956071	0.999964	8.04855	0.997418
Prpf6	2:181631435-181632087	652	3	2	0	|	0	0	1	||	74	53	36	|	65	47	36	||	0	-2.06159	0.370968	7.9827	0.144569	||	0	-0.189947	0.998613	7.9827	0.640637
Dcaf8	1:172173943-172187460	13517	0	1	4	|	0	0	1	||	143	128	111	|	117	108	103	||	0	-2.0262	0.371186	8.93048	0.144974	||	0	-0.253054	0.998613	8.93048	0.408173
Rhot1	11:80223903-80227332	3429	1	1	3	|	1	0	0	||	107	98	106	|	86	64	101	||	0	-2.01991	0.371186	8.65219	0.145073	||	0	-0.338712	0.958124	8.65219	0.250352
Ttc39c	18:12684837-12698059	13222	3	3	2	|	2	0	0	||	253	192	212	|	249	74	51	||	0	-1.70749	0.371862	9.41107	0.145548	||	0	-0.854288	0.903042	9.41107	0.121743
Snx13	12:35078900-35086984	8084	2	1	0	|	1	0	6	||	41	77	76	|	50	50	59	||	0	1.42566	0.374097	8.1692	0.146634	||	0	-0.288705	0.998613	8.1692	0.357047
Snx13	12:35085939-35107556	21617	0	0	5	|	0	0	1	||	59	98	93	|	92	69	107	||	0	-2.01985	0.374384	8.54504	0.146958	||	0	0.0871163	0.998613	8.54504	0.785651
Dpyd	3:118797348-118811267	13919	3	14	4	|	4	1	3	||	316	806	586	|	511	490	210	||	0	-1.15734	0.376406	10.7343	0.147965	||	0	-0.485619	0.998613	10.7343	0.37622
Larp1	11:58040391-58044050	3659	2	0	3	|	0	0	1	||	57	87	43	|	95	96	64	||	0	-2.03294	0.377306	8.37767	0.148532	||	0	0.419458	0.958124	8.37767	0.264331
Lonp2	8:86631386-86652317	20931	2	1	2	|	1	0	0	||	286	310	533	|	236	177	215	||	0	-2.02226	0.378476	9.98764	0.149408	||	0	-0.842099	0.432933	9.98764	0.0139577
Cep192	18:67852904-67855375	2471	0	0	5	|	0	0	1	||	7	7	9	|	12	10	15	||	0	-2.01809	0.378476	6.22657	0.14956	||	0	0.652821	0.911982	6.22657	0.180386
Sntg2	12:30257966-30307383	49417	0	2	3	|	1	0	0	||	56	54	35	|	15	10	11	||	0	-2.01594	0.378476	7.37191	0.149635	||	0	-2.03017	0.000391998	7.37191	6.65156e-07
Nfix	8:84771784-84772315	531	17	6	15	|	10	1	7	||	56	61	36	|	61	48	34	||	0	-0.810523	0.381427	8.78961	0.151017	||	0	-0.134136	0.998613	8.78961	0.750435
Map2k5	9:63293524-63322267	28743	0	2	3	|	1	0	0	||	18	56	43	|	41	45	42	||	0	-2.01399	0.383116	7.68834	0.151903	||	0	0.133016	0.998613	7.68834	0.730396
Ube2k	5:65565989-65594548	28559	4	5	3	|	5	3	11	||	74	132	112	|	131	80	137	||	0	0.876129	0.385439	9.14163	0.153042	||	0	0.112303	0.998613	9.14163	0.736835
Pon1	6:5184746-5187004	2258	0	1	3	|	0	8	0	||	3846	3700	5555	|	2853	2121	4011	||	0	1.357	0.388199	13.2653	0.154457	||	0	-0.560273	0.911982	13.2653	0.190489
Oxr1	15:41797474-41826052	28578	5	4	2	|	1	0	3	||	84	107	62	|	87	51	58	||	0	-1.23427	0.388199	8.52812	0.154577	||	0	-0.406832	0.958124	8.52812	0.260448
Slc10a7	8:78515586-78531158	15572	1	0	3	|	1	4	3	||	28	40	37	|	27	27	43	||	0	1.26084	0.388565	7.60438	0.154942	||	0	-0.130685	0.998613	7.60438	0.683725
Ghr	15:3327974-3347601	19627	0	1	10	|	0	2	1	||	683	1218	1240	|	486	236	159	||	0	-1.50583	0.394168	11.0379	0.1574	||	0	-1.83414	0.199585	11.0379	0.00308225
Slco1b2	6:141648489-141657606	9117	4	7	6	|	2	4	1	||	2563	3309	3669	|	2402	1935	2910	||	0	-0.990919	0.395283	12.9094	0.158257	||	0	-0.411076	0.911982	12.9094	0.197251
Abcc6	7:45996655-46001070	4415	0	3	0	|	2	2	3	||	182	165	122	|	147	124	58	||	0	1.45467	0.395283	9.12447	0.158292	||	0	-0.544853	0.911982	9.12447	0.198585
Fxr2	11:69649728-69651723	1995	4	0	1	|	1	0	0	||	55	31	29	|	62	23	30	||	0	-2.02837	0.397113	7.63436	0.159349	||	0	-0.0610065	0.998613	7.63436	0.900453
Fgfr2	7:130218998-130242644	23646	0	0	3	|	0	2	5	||	22	28	31	|	35	29	85	||	0	1.44778	0.397113	7.69115	0.159474	||	0	0.848834	0.814996	7.69115	0.05936
Arid1b	17:5040580-5127024	86444	0	3	4	|	0	0	2	||	11	8	18	|	18	15	23	||	0	-1.54493	0.398452	6.72904	0.160418	||	0	0.578648	0.911982	6.72904	0.169359
Smyd4	11:75390072-75391227	1155	0	0	2	|	0	1	5	||	2	9	12	|	2	6	7	||	0	1.75776	0.398452	5.92217	0.160463	||	0	-0.568608	0.998613	5.92217	0.446507
Hipk3	2:104470749-104471847	1098	0	2	4	|	2	1	8	||	98	87	70	|	123	136	95	||	0	1.09279	0.404709	8.88795	0.163211	||	0	0.441506	0.911982	8.88795	0.200802
Plxnd1	6:115969876-115970248	372	1	3	0	|	1	0	8	||	26	53	30	|	33	48	83	||	0	1.30623	0.405801	7.94199	0.163881	||	0	0.561977	0.932985	7.94199	0.23008
Uqcrfs1	13:30540650-30540709	59	2	2	2	|	4	2	5	||	587	841	893	|	799	452	705	||	0	1.11866	0.408566	11.1318	0.165229	||	0	-0.261723	0.998613	11.1318	0.48731
Rere	4:150406196-150439468	33272	2	3	4	|	0	1	2	||	10	25	21	|	22	21	13	||	0	-1.3268	0.409835	6.99843	0.166294	||	0	0.000399548	0.999964	6.99843	0.999399
Stk35	2:129810488-129811237	749	3	1	5	|	2	1	0	||	15	13	12	|	14	11	10	||	0	-1.298	0.409835	6.63492	0.166298	||	0	-0.212076	0.998613	6.63492	0.61031
Rpl4	9:64178382-64178508	126	0	1	0	|	0	0	4	||	365	888	1205	|	466	861	1314	||	0	2.11133	0.409835	11.2929	0.166438	||	0	0.1279	0.998613	11.2929	0.820932
Tmbim6	15:99401580-99402169	589	3	10	3	|	5	0	1	||	1514	1546	899	|	1030	1295	1424	||	0	-1.14164	0.413633	11.9092	0.168214	||	0	-0.124585	0.998613	11.9092	0.800011
Xpnpep3	15:81430690-81438180	7490	5	0	2	|	2	0	0	||	32	32	20	|	24	20	18	||	0	-1.52654	0.415302	7.20584	0.169128	||	0	-0.469593	0.958124	7.20584	0.244979
Evi5	5:107788199-107790508	2309	6	1	0	|	1	4	8	||	195	181	427	|	281	207	218	||	0	1.07594	0.418769	9.91111	0.170776	||	0	-0.169998	0.998613	9.91111	0.692284
Abcc2	19:43798407-43799145	738	2	4	0	|	2	4	5	||	467	576	499	|	663	472	407	||	0	1.10366	0.419624	10.7463	0.171362	||	0	-0.021912	0.999964	10.7463	0.953875
Mdm4	1:133009137-133012714	3577	1	0	1	|	2	2	1	||	33	34	41	|	39	49	41	||	0	1.56869	0.42021	7.68146	0.171839	||	0	0.244313	0.998613	7.68146	0.389835
Evi5	5:107764676-107799260	34584	2	4	11	|	4	0	3	||	126	173	262	|	208	148	129	||	0	-0.992398	0.422984	9.53381	0.17324	||	0	-0.199794	0.998613	9.53381	0.59877
Ganc	2:120423699-120428897	5198	0	2	0	|	1	4	0	||	20	23	22	|	21	32	25	||	0	1.58419	0.422984	7.13213	0.173452	||	0	0.248192	0.998613	7.13213	0.502054
Itsn2	12:4630637-4633562	2925	0	2	0	|	1	4	0	||	24	39	57	|	46	39	45	||	0	1.58496	0.42299	7.73215	0.173694	||	0	0.120267	0.998613	7.73215	0.723495
Acat3	17:12925268-12928638	3370	1	1	5	|	0	0	2	||	481	639	1029	|	516	376	366	||	0	-1.54206	0.424595	10.8053	0.174593	||	0	-0.76037	0.814996	10.8053	0.0608481
Eri3	4:117582600-117593162	10562	3	3	2	|	2	1	11	||	69	45	35	|	67	53	51	||	0	0.977913	0.427279	8.28169	0.176001	||	0	0.14671	0.998613	8.28169	0.708056
Cep350	1:155958561-155962560	3999	0	0	7	|	2	0	0	||	38	26	42	|	37	30	26	||	0	-1.49538	0.427279	7.52413	0.17618	||	0	-0.204282	0.998613	7.52413	0.580848
Lsm14a	7:34351286-34351517	231	0	2	0	|	1	2	2	||	74	84	95	|	83	69	94	||	0	1.55756	0.429256	8.52646	0.177238	||	0	-0.0573113	0.998613	8.52646	0.834826
Ghr	15:3327974-3458008	130034	0	2	3	|	0	1	0	||	733	1044	1101	|	520	195	121	||	0	-1.98742	0.436519	10.9125	0.180685	||	0	-1.79398	0.166013	10.9125	0.00174359
Pcmt1	10:7640045-7649155	9110	2	0	0	|	2	1	2	||	143	102	154	|	111	95	119	||	0	1.55625	0.436519	8.96283	0.180731	||	0	-0.318345	0.958124	8.96283	0.285002
Luc7l	17:26266283-26267358	1075	8	7	9	|	2	0	10	||	49	30	65	|	54	34	65	||	0	-0.815442	0.437692	8.42952	0.181464	||	0	0.0681355	0.998613	8.42952	0.858862
Eya3	4:132656693-132673032	16339	1	0	1	|	1	3	1	||	28	42	19	|	26	49	42	||	0	1.58795	0.438047	7.53327	0.181859	||	0	0.365725	0.998613	7.53327	0.383582
Gfra1	19:58263912-58270163	6251	1	2	0	|	0	0	7	||	149	105	71	|	160	156	139	||	0	1.3683	0.442171	9.08892	0.183948	||	0	0.430267	0.979392	9.08892	0.303567
Zeb1	18:5633204-5641518	8314	2	0	0	|	1	0	4	||	19	16	21	|	13	16	20	||	0	1.53598	0.442171	6.80142	0.184312	||	0	-0.207224	0.998613	6.80142	0.579754
Deptor	15:55208731-55218273	9542	2	11	2	|	2	1	3	||	93	152	108	|	124	83	34	||	0	-1.11145	0.442171	8.91184	0.184321	||	0	-0.562135	0.958124	8.91184	0.269009
Hmgxb3	18:61140791-61141790	999	2	0	0	|	2	0	3	||	28	17	31	|	38	27	22	||	0	1.53972	0.453196	7.26522	0.189174	||	0	0.176538	0.998613	7.26522	0.645529
Gk	X:85730202-85761407	31205	0	1	1	|	0	2	3	||	425	513	717	|	567	412	637	||	0	1.54732	0.46132	10.7531	0.192826	||	0	-0.0408724	0.998613	10.7531	0.911566
Ubn2	6:38440455-38452971	12516	2	4	5	|	1	2	1	||	14	11	40	|	15	13	10	||	0	-1.16969	0.464081	6.99327	0.194242	||	0	-0.739588	0.903042	6.99327	0.135518
Gsap	5:21278045-21281602	3557	4	4	0	|	5	3	6	||	19	44	86	|	14	26	40	||	0	1.02432	0.464433	7.92568	0.194863	||	0	-0.856564	0.870401	7.92568	0.0973917
Strn3	12:51647994-51661713	13719	6	8	3	|	4	0	4	||	63	63	75	|	61	51	73	||	0	-0.850328	0.464433	8.51383	0.194915	||	0	-0.139232	0.998613	8.51383	0.639667
Zfp532	18:65638750-65656632	17882	0	0	2	|	4	1	0	||	4	8	3	|	3	11	5	||	0	1.69262	0.468077	5.81951	0.196709	||	0	0.318402	0.998613	5.81951	0.687186
Mad1l1	5:140105515-140132825	27310	2	1	4	|	1	0	1	||	80	47	46	|	113	23	44	||	0	-1.52386	0.468625	8.16559	0.198893	||	0	-0.0105203	0.999964	8.16559	0.984326
Fam169b	7:68300833-68304651	3818	5	3	6	|	6	5	8	||	38	40	43	|	22	20	24	||	0	0.698827	0.468625	7.99002	0.19899	||	0	-0.885447	0.197286	7.99002	0.00278968
Pdia5	16:35449403-35456545	7142	3	2	0	|	0	2	8	||	59	75	32	|	71	147	94	||	0	1.14268	0.468625	8.60196	0.201583	||	0	0.877289	0.832304	8.60196	0.0687166
Vapa	17:65592291-65595054	2763	4	3	5	|	2	0	3	||	199	248	201	|	212	145	196	||	0	-1.01298	0.468625	9.63937	0.205242	||	0	-0.258297	0.998613	9.63937	0.41378
Cers6	2:69068629-69071438	2809	0	0	2	|	0	0	5	||	28	46	30	|	36	36	81	||	0	1.51042	0.468625	7.76008	0.207885	||	0	0.522426	0.932583	7.76008	0.229137
Atxn7	14:14013073-14013655	582	6	1	3	|	0	1	3	||	23	19	22	|	25	15	22	||	0	-1.07786	0.468625	7.1703	0.209352	||	0	-0.0708417	0.998613	7.1703	0.847323
Fer	17:64029290-64037664	8374	2	0	5	|	2	0	0	||	23	38	50	|	12	36	54	||	0	-1.47573	0.468625	7.58975	0.209372	||	0	-0.113339	0.998613	7.58975	0.828775
Ctif	18:75519739-75521869	2130	1	0	1	|	1	2	2	||	36	16	7	|	60	43	25	||	0	1.57333	0.468625	7.43103	0.209781	||	0	1.03151	0.832304	7.43103	0.0753653
Atrx	X:105899881-105911654	11773	0	0	0	|	0	1	0	||	35	51	58	|	30	34	35	||	0	4.9527	0.468625	7.58524	0.210623	||	0	-0.542632	0.814996	7.58524	0.0593817
Dcaf17	2:71056495-71063495	7000	0	0	0	|	1	0	0	||	25	26	33	|	15	15	12	||	0	4.95178	0.468625	6.8353	0.210667	||	0	-0.999279	0.199585	6.8353	0.00316085
Foxn3	12:99388361-99388917	556	0	0	0	|	0	1	0	||	44	62	48	|	49	37	47	||	0	4.95329	0.468625	7.78656	0.210708	||	0	-0.232767	0.998613	7.78656	0.421856
Sos1	17:80445430-80460047	14617	0	0	0	|	1	0	0	||	20	22	23	|	23	16	25	||	0	4.95212	0.468625	6.85979	0.210734	||	0	-0.0420319	0.998613	6.85979	0.900532
Strn3	12:51621780-51661713	39933	0	0	0	|	1	0	0	||	70	53	75	|	60	56	73	||	0	4.95254	0.468625	8.14148	0.210818	||	0	-0.0886288	0.998613	8.14148	0.750815
Setd2	9:110590388-110604231	13843	0	0	0	|	1	0	0	||	41	43	51	|	52	46	33	||	0	4.95255	0.468625	7.69674	0.21082	||	0	-0.0543368	0.998613	7.69674	0.854245
Sp3	2:72970155-72971514	1359	0	0	0	|	1	0	0	||	70	90	92	|	98	85	88	||	0	4.95263	0.468625	8.49884	0.210835	||	0	0.0915543	0.998613	8.49884	0.73603
not_annotated	12:69361273-69361424	151	10	0	0	|	4	0	0	||	7629	7529	7536	|	7405	7456	7736	||	0	-1.06007	0.468625	14.2756	0.210845	||	0	-0.0308172	0.998613	14.2756	0.894186
Ckap5	2:91546322-91550758	4436	0	0	0	|	1	0	0	||	29	33	37	|	33	46	55	||	0	4.95284	0.468625	7.53894	0.210878	||	0	0.421009	0.911982	7.53894	0.175722
Rnf214	9:45890804-45900256	9452	0	0	0	|	0	1	0	||	42	26	35	|	38	27	27	||	0	4.95546	0.468625	7.33836	0.211022	||	0	-0.191114	0.998613	7.33836	0.585505
Tacc1	8:25159645-25177994	18349	0	0	0	|	1	0	0	||	46	28	32	|	55	49	56	||	0	4.95365	0.468625	7.70173	0.211039	||	0	0.555564	0.861274	7.70173	0.0858526
Birc6	17:74622909-74625239	2330	0	0	0	|	1	0	0	||	60	98	77	|	96	64	91	||	0	4.95408	0.468625	8.40932	0.211126	||	0	0.0742421	0.998613	8.40932	0.810688
Sox6	7:115801369-115801609	240	0	0	0	|	0	0	1	||	28	33	31	|	34	34	33	||	0	4.94466	0.468625	7.32076	0.211341	||	0	0.117098	0.998613	7.32076	0.684194
Fech	18:64470682-64483457	12775	0	0	0	|	1	0	0	||	144	199	139	|	156	196	177	||	0	4.95546	0.468625	9.29909	0.211407	||	0	0.113248	0.998613	9.29909	0.730318
Ckap5	2:91559049-91563113	4064	0	0	0	|	1	0	0	||	22	44	64	|	31	28	28	||	0	4.95569	0.468625	7.4429	0.211452	||	0	-0.560877	0.903042	7.4429	0.135837
Cse1l	2:166941218-166941492	274	0	0	0	|	1	0	0	||	45	88	106	|	56	48	85	||	0	4.95598	0.468625	8.24697	0.211513	||	0	-0.335568	0.998613	8.24697	0.345906
Prmt9	8:77563976-77565146	1170	0	0	0	|	1	0	0	||	31	26	64	|	30	25	38	||	0	4.95609	0.468625	7.42784	0.211534	||	0	-0.373004	0.998613	7.42784	0.330555
Rnf111	9:70469355-70476668	7313	0	0	0	|	0	1	0	||	28	28	14	|	39	25	26	||	0	4.95913	0.468625	7.11313	0.211562	||	0	0.314748	0.998613	7.11313	0.453195
Scaper	9:55858081-55859918	1837	0	0	0	|	0	1	0	||	14	21	39	|	28	15	27	||	0	4.95937	0.468625	6.96982	0.211599	||	0	-0.0739909	0.998613	6.96982	0.862817
Qser1	2:104776172-104780260	4088	0	0	0	|	1	0	0	||	10	28	19	|	29	34	25	||	0	4.95653	0.468625	6.99156	0.211625	||	0	0.618629	0.903042	6.99156	0.136376
Vezf1	11:88073057-88078555	5498	0	0	0	|	1	0	0	||	13	25	11	|	19	21	26	||	0	4.95673	0.468625	6.73676	0.211668	||	0	0.398682	0.998613	6.73676	0.358007
Ep300	15:81600908-81601545	637	0	0	0	|	0	1	0	||	44	35	21	|	45	26	29	||	0	4.9599	0.468625	7.37374	0.211678	||	0	-0.0527481	0.998613	7.37374	0.899808
Cdk13	13:17800794-17801457	663	0	0	0	|	1	0	0	||	2	4	4	|	5	6	7	||	0	4.9569	0.468625	5.40425	0.211702	||	0	0.79475	0.911982	5.40425	0.20434
Rfc1	5:65301933-65303208	1275	0	0	0	|	1	0	0	||	22	51	46	|	19	34	36	||	0	4.95696	0.468625	7.40199	0.211714	||	0	-0.412012	0.981135	7.40199	0.304662
[truncated: 993 more rows]
