# Supplementary material for: ADAR-deficiency perturbs the global splicing landscape in mouse tissues
Source: Genome Res. 2020 Aug;30(8):1107–18. doi: 10.1101/gr.256933.119 (PMC7462079; doi:10.1101/gr.256933.119)
Supplement: Supplemental Material [file supp_gr.256933.119_Supplemental_Table_S1.xlsx]

## Sheet: Legend
Supp. Table1: Overlay of differentially edited sites within the coordinates of DEXSeq predicted fragments to have differential exon/intron usage
Column Header	Column Description
Gene Name	Name of the Gene harboring differential exon/intron usage event and editing site
Gene Description	Description of the Gene harboring differential exon/intron usage event and editing site
Gene Fragment ID	ID of the gene fragment predicted to have differential exon/intron usage as predicted by DEXSeq; eg. ENSMUSG00000044339:E005:: ENSMUSG00000044339 is Ensembl Gene ID and E005 is the 5th fragment of the gene that has been predicted to have differential exon/intron usage
Number of Differential Editing Sites	Number of Differential Editing Sites within the coordintates of DEXSeq Fragment
Editing Levels in Adar WT Cortex	Editing Levels of sites within the coordniates of DEXSeq fragment in Adar WT Cortex
Editing Levels in Adar KO Cortex	Editing Levels of sites within the coordniates of DEXSeq fragment in Adar KO Cortex
DEXSeq adj. p-value	Adjusted p-value of DEXSeq event (≤ 0.1 is considered significant)
Log2FC	Log2 Fold Change::: Values greater (>) than zero means higher usage in WT and less (<0) than zero means higher usage in Mutant

## Sheet: Table
Gene Name	Gene Description	Gene Fragment ID	Number of Differential Editing Sites	Editing Levels in Adar WT Cortex	Editing Levels in Adar KO Cortex	DEXSeq adj. p-value	Log2FC:: >0-Higher in WT <0-Higher in KO
Alkbh2	alkB homolog 2, alpha-ketoglutarate-dependent dioxygenase	ENSMUSG00000044339:E005	1	0.33	0	0.001	0.55
Atp1a3	ATPase, Na+/K+ transporting, alpha 3 polypeptide	ENSMUSG00000040907:E015	2	0.27; 0.22	0	0.033	1.17
Dusp11	dual specificity phosphatase 11 (RNA/RNP complex 1-interacting	ENSMUSG00000030002:E019	1	0.25	0	0.004	0.8
Eif3c	eukaryotic translation initiation factor 3, subunit C	ENSMUSG00000030738:E012	1	0.7	0.14	0.006	-1.15
Eloc	elongin C	ENSMUSG00000079658:E010	1	0.14	0	0.012	0.67
Ezh1	enhancer of zeste 1 polycomb repressive complex 2 subunit	ENSMUSG00000006920:E018	4	0.07; 0.05; 0.05; 0.46	0	0.01	0.52
Gm1976	predicted gene 1976	ENSMUSG00000066057:E005	3	0.2; 0.07; 0.45	0	0.046	0.43
Gtf2a2	general transcription factor II A, 2	ENSMUSG00000033543:E022	3	0.4; 0.29; 0.29	0.04; 0.04; 0.05	0.008	0.95
Ino80dos	INO80 complex subunit D, opposite strand	ENSMUSG00000084799:E009	1	0.88	0.06	0.000151162	-0.66
Mcat	malonyl CoA:ACP acyltransferase (mitochondrial)	ENSMUSG00000048755:E006	1	0.54	0.04	1.43354e-07	1.25
Mrps17	mitochondrial ribosomal protein S17	ENSMUSG00000034211:E033	1	0.13	0	0.037	0.49
Pin1	protein (peptidyl-prolyl cis/trans isomerase) NIMA-interacting 1	ENSMUSG00000032171:E002	1	0.11	0	0.005	-1.21
Pnpla6	patatin-like phospholipase domain containing 6	ENSMUSG00000004565:E060	2	0.66; 0.01	0.02; 0.25	0.02	0.77
Ppm1b	protein phosphatase 1B, magnesium dependent, beta isoform	ENSMUSG00000061130:E013	1	0.33	0	0.039	0.69
Pptc7	PTC7 protein phosphatase homolog	ENSMUSG00000038582:E002	1	0.52	0.05	0.002	-0.81
Rbbp4	retinoblastoma binding protein 4, chromatin remodeling factor	ENSMUSG00000057236:E010	2	0.77; 0.07	0.52; 0.26	0.052	-0.77
Rbm8a	RNA binding motif protein 8a	ENSMUSG00000038374:E019	3	0.03; 0.68; 0.03	0	1.39978e-20	0.96
Rmnd1	required for meiotic nuclear division 1 homolog	ENSMUSG00000019763:E032	1	0.99	0.11	9.36089e-05	1.2
Rrp1b	ribosomal RNA processing 1 homolog B (S. cerevisiae)	ENSMUSG00000058392:E053	1	0.29	0	0.098	0.33
Rsrc2	arginine/serine-rich coiled-coil 2	ENSMUSG00000029422:E038	2	0.68; 0.23	0.3; 0	0.099	0.97
Smyd3	SET and MYND domain containing 3	ENSMUSG00000055067:E001	2	0.09; 0.23	0.03; 0.06	0.088	-0.46
Ubxn2a	UBX domain protein 2A	ENSMUSG00000020634:E004	1	0.33	0.05	0.009	-0.48
Zkscan3	zinc finger with KRAB and SCAN domains 3	ENSMUSG00000021327:E004	1	0.16	0	1.95983e-05	0.96
