# Supplementary material for: ADAR-deficiency perturbs the global splicing landscape in mouse tissues
Source: Genome Res. 2020 Aug;30(8):1107–18. doi: 10.1101/gr.256933.119 (PMC7462079; doi:10.1101/gr.256933.119)
Supplement: Supplemental Material [file supp_gr.256933.119_Supplemental_Table_S2.xlsx]

## Sheet: Legend
Supplemental Table S2: Gene Ontology analysis of alternatively spliced genes for DEXSeq
For genes differentially spliced in the DEXSeq datasets a Gene Ontology (GO) analysis was done. Significant hits on ontology terms linked with splicing and RNA processing are highlighted in green.
The analysis was done either for Adar (Adar1) alone or Adar and Adarb1 (Adar2) for different tissues (Bone Marrow, Liver, Cortex, Brain). Adar1--E861A is an editing-inactive variant of Adar1.

## Sheet: DEXSeq Bone Marrow (Adar1 KO)
Term	Overlap	P-value	Adjusted P-value	Z-score	Combined Score	Genes
filopodium assembly (GO:0046847)	6/16	3.24327e-06	0.00763465	-2.1205	26.8009	FGD3;FGD5;SPATA13;ARHGEF4;SRGAP2;FGD1
plasma membrane bounded cell projection assembly (GO:0120031)	19/242	6.84768e-05	0.0537315	-1.78501	17.1164	DNAAF1;FUZ;FGD1;MTSS1;MYLK;FGD3;AHI1;FGD5;TMEM67;SPATA13;ARHGEF4;FLNA;POC1B;TRIM59;WDPCP;SRGAP2;SNAP29;BBS4;ARHGEF6
mitotic G1 DNA damage checkpoint (GO:0031571)	3/11	0.00318661	0.559818	-2.8524	16.3979	CCND1;PRKDC;RPA2
regulation of morphogenesis of an epithelium (GO:1905330)	3/10	0.00236729	0.559818	-2.54488	15.3864	RNF207;FGFR2;FOXP1
carbohydrate phosphorylation (GO:0046835)	3/12	0.00415965	0.572793	-2.77952	15.2382	GNPTAB;RBKS;HK1
brain morphogenesis (GO:0048854)	3/12	0.00415965	0.572793	-2.6829	14.7085	CTNNA2;SHANK2;BBS4
regulation of leukocyte migration (GO:0002685)	3/14	0.00659714	0.589712	-2.75975	13.857	BST1;ANXA1;MIA3
chromatin-mediated maintenance of transcription (GO:0048096)	2/8	0.0201908	0.636112	-3.53972	13.8139	ARID1A;ARID1B
response to interleukin-6 (GO:0070741)	3/13	0.00529424	0.589712	-2.61997	13.7316	SELPLG;PID1;ST3GAL6
regulation of catenin import into nucleus (GO:0035412)	4/20	0.00218489	0.559818	-2.21161	13.5487	GNAQ;UBR5;DAB2IP;EGFR
regulation of intracellular signal transduction (GO:1902531)	24/423	0.0011291	0.53158	-1.97005	13.3694	SGMS1;ULK4;DAB2IP;PRKAG2;RPA2;AKAP7;ARHGAP17;VRK2;ARHGAP24;RHOA;FGD1;EGFR;ARHGAP23;FGD3;TIAM2;BST1;AKAP13;BOP1;RHOT2;ARHGEF3;ARHGEF4;FBXL2;SRGAP2;ARHGEF6
regulation of small GTPase mediated signal transduction (GO:0051056)	14/141	5.10494e-05	0.0537315	-1.31809	13.0263	RASGRF1;ARHGAP17;ARHGAP24;RHOA;FGD1;ARHGAP23;FGD3;TIAM2;AKAP13;RHOT2;ARHGEF3;ARHGEF4;SRGAP2;ARHGEF6
response to UV-A (GO:0070141)	2/7	0.0154313	0.636112	-3.02589	12.6221	CCND1;EGFR
V(D)J recombination (GO:0033151)	2/8	0.0201908	0.636112	-3.23085	12.6085	DCAF1;RAG2
cargo loading into COPII-coated vesicle (GO:0090110)	3/13	0.00529424	0.589712	-2.3601	12.3696	TBC1D20;MIA3;SEC24D
regulation of relaxation of cardiac muscle (GO:1901897)	2/7	0.0154313	0.636112	-2.96177	12.3546	PDE4D;PDE4B
positive regulation of interleukin-2 production (GO:0032743)	4/21	0.0026389	0.559818	-2.05077	12.1762	CD86;ANXA1;PDE4D;PDE4B
regulation of T cell tolerance induction (GO:0002664)	2/7	0.0154313	0.636112	-2.85606	11.9136	IL2RA;TGFBR2
positive regulation of response to wounding (GO:1903036)	3/16	0.00973012	0.636112	-2.5519	11.8217	ARFGEF1;ANXA1;MYLK
negative regulation of production of miRNAs involved in gene silencing by miRNA (GO:1903799)	2/8	0.0201908	0.636112	-2.79127	10.893	NCOR1;ESR1
cellular response to interleukin-6 (GO:0071354)	4/24	0.00437989	0.572793	-2.00213	10.873	SELPLG;PID1;ST3GAL6;IL6ST
DNA replication initiation (GO:0006270)	4/25	0.00509858	0.589712	-2.01546	10.6392	PRIM2;ORC3;ORC2;MCM10
regulation of production of miRNAs involved in gene silencing by miRNA (GO:1903798)	3/14	0.00659714	0.589712	-2.11885	10.639	NCOR1;ESR1;EGFR
left/right pattern formation (GO:0060972)	2/8	0.0201908	0.636112	-2.72592	10.638	AHI1;DNAAF1
morphogenesis of a polarized epithelium (GO:0001738)	2/8	0.0201908	0.636112	-2.70447	10.5543	AHI1;FUZ
epiboly involved in wound healing (GO:0090505)	3/15	0.00807415	0.605912	-2.15499	10.3851	FLNA;CD44;RHOA
positive regulation of wound healing (GO:0090303)	4/27	0.0067639	0.589712	-2.06352	10.3097	ARFGEF1;ANXA1;HPSE;MYLK
leukocyte aggregation (GO:0070486)	2/8	0.0201908	0.636112	-2.63304	10.2755	SEMA4D;CD44
positive regulation of catenin import into nucleus (GO:0035413)	2/9	0.025476	0.668305	-2.79048	10.2411	UBR5;EGFR
lipid phosphorylation (GO:0046834)	5/36	0.00332942	0.559818	-1.76856	10.0895	DGKD;PI4KA;TTC7B;PI4KB;IP6K1
regulation of vesicle fusion (GO:0031338)	7/62	0.00184593	0.559818	-1.55849	9.81032	TBC1D1;RABGAP1L;RABGAP1;ANXA1;TBC1D2B;TBC1D17;TBC1D22A
amino sugar metabolic process (GO:0006040)	2/11	0.0374902	0.677417	-2.98473	9.80088	FN3K;GNE
lamellipodium assembly (GO:0030032)	4/24	0.00437989	0.572793	-1.7907	9.72479	SPATA13;ARHGEF4;SRGAP2;ARHGEF6
maintenance of protein localization in organelle (GO:0072595)	3/19	0.0158079	0.636112	-2.34451	9.72326	TAPT1;BBS4;HK1
nucleobase-containing compound biosynthetic process (GO:0034654)	3/18	0.0135942	0.636112	-2.25096	9.67488	GMPR2;AMPD3;TYMS
cAMP catabolic process (GO:0006198)	2/8	0.0201908	0.636112	-2.46845	9.63318	PDE4D;PDE4B
negative regulation of insulin receptor signaling pathway (GO:0046627)	4/26	0.00589217	0.589712	-1.82552	9.37244	SOCS2;PTPRE;PID1;PRKCB
response to organophosphorus (GO:0046683)	3/19	0.0158079	0.636112	-2.25734	9.36173	DUOX1;P2RX4;TYMS
spindle assembly (GO:0051225)	7/81	0.00823669	0.605912	-1.94031	9.31186	NCOR1;KIF2A;STARD9;FLNA;TUBGCP4;RHOA;KPNB1
positive regulation of cilium assembly (GO:0045724)	3/17	0.0115691	0.636112	-2.06732	9.21906	FUZ;TAPT1;BBS4
lipoprotein localization (GO:0044872)	2/9	0.025476	0.668305	-2.47042	9.06647	PRKCB;MIA3
regulation of Ras protein signal transduction (GO:0046578)	7/91	0.0150754	0.636112	-2.14347	8.99117	SYNGAP1;APLP2;RASA1;RASGRF1;DAB2IP;ARHGAP17;RASGRP1
negative regulation of cellular response to insulin stimulus (GO:1900077)	4/27	0.0067639	0.589712	-1.78111	8.89872	SOCS2;PTPRE;PID1;PRKCB
regulation of osteoblast proliferation (GO:0033688)	3/17	0.0115691	0.636112	-1.96249	8.75156	HPSE;FGFR2;RHOA
maintenance of protein localization in endoplasmic reticulum (GO:0035437)	2/10	0.0312532	0.677417	-2.50454	8.67981	OS9;TAPT1
actin crosslink formation (GO:0051764)	2/10	0.0312532	0.677417	-2.48573	8.61464	BAIAP2L1;FLNA
negative regulation of vascular endothelial growth factor receptor signaling pathway (GO:0030948)	2/10	0.0312532	0.677417	-2.4805	8.59652	DAB2IP;FAM129B
regulation of myeloid leukocyte differentiation (GO:0002761)	2/11	0.0374902	0.677417	-2.61768	8.59561	UBASH3B;FOXP1
negative regulation of protein localization to plasma membrane (GO:1903077)	3/20	0.0182119	0.636112	-2.11185	8.45938	PID1;TMBIM1;PPP2R5A
negative regulation of gene silencing by miRNA (GO:0060965)	2/11	0.0374902	0.677417	-2.56317	8.41663	NCOR1;ESR1
regulation of GTPase activity (GO:0043087)	14/189	0.0010624	0.53158	-1.22855	8.41215	ARFGEF1;GPSM1;RABGAP1;SEMA4D;RASGRF1;DAB2IP;RASGRP1;FGD1;ARHGAP23;FGD3;FGD5;TBC1D20;SRGAP2;PRKG1
regulation of Rac protein signal transduction (GO:0035020)	2/10	0.0312532	0.677417	-2.4234	8.39863	RASGRF1;ARHGAP17
G1 DNA damage checkpoint (GO:0044783)	2/11	0.0374902	0.677417	-2.55636	8.39426	CCND1;RPA2
regulation of neuron migration (GO:2001222)	3/20	0.0182119	0.636112	-2.08219	8.34057	ULK4;DAB2IP;SRGAP2
lipoprotein transport (GO:0042953)	2/9	0.025476	0.668305	-2.26214	8.3021	PRKCB;MIA3
activation of GTPase activity (GO:0090630)	8/85	0.00288149	0.559818	-1.41781	8.29339	TBC1D1;RABGAP1L;RABGAP1;RASGRF1;TBC1D2B;TBC1D17;RASGRP1;TBC1D22A
regulation of actin filament-based movement (GO:1903115)	2/11	0.0374902	0.677417	-2.52145	8.27962	PDE4D;PDE4B
modulation by host of viral genome replication (GO:0044827)	2/12	0.0441563	0.677417	-2.63042	8.20698	TBC1D20;FBXL2
morphogenesis of an epithelium (GO:0002009)	3/20	0.0182119	0.636112	-2.03564	8.15411	AHI1;MPP5;FGFR2
gamma-aminobutyric acid signaling pathway (GO:0007214)	3/20	0.0182119	0.636112	-2.03066	8.13417	GABBR2;GABRR1;GNAI2
regulation of cardiac muscle contraction (GO:0055117)	4/36	0.0185831	0.636112	-2.00107	7.97527	P2RX4;RNF207;PDE4D;PDE4B
positive regulation of lipase activity (GO:0060193)	2/11	0.0374902	0.677417	-2.41787	7.9395	FGFR2;RHOA
negative regulation of protein localization to cell periphery (GO:1904376)	3/20	0.0182119	0.636112	-1.98026	7.93229	PID1;TMBIM1;PPP2R5A
fatty acid transmembrane transport (GO:1902001)	2/12	0.0441563	0.677417	-2.51903	7.85941	CPT1A;PRKAG2
positive regulation of mesenchymal cell proliferation (GO:0002053)	2/12	0.0441563	0.677417	-2.50992	7.831	FGFR2;TGFBR2
negative regulation of protein phosphorylation (GO:0001933)	13/179	0.00188696	0.559818	-1.23491	7.74632	PID1;SEMA4D;PRKDC;PDE4D;FAM129A;DAB2IP;PRKAG2;LDLRAD4;SOCS2;UBASH3B;GNAQ;CEP85;SOCS6
carnitine shuttle (GO:0006853)	2/12	0.0441563	0.677417	-2.47879	7.73389	CPT1A;PRKAG2
wound healing, spreading of cells (GO:0044319)	3/21	0.0208074	0.636112	-1.99297	7.71767	FLNA;CD44;RHOA
cyclic nucleotide catabolic process (GO:0009214)	2/10	0.0312532	0.677417	-2.2269	7.71764	PDE4D;PDE4B
establishment of synaptic vesicle localization (GO:0097480)	2/12	0.0441563	0.677417	-2.43242	7.58919	RAB27A;SPG11
regulation of vascular endothelial growth factor receptor signaling pathway (GO:0030947)	3/23	0.0265742	0.668305	-2.09063	7.58443	PRKCB;DAB2IP;FAM129B
apical junction assembly (GO:0043297)	4/36	0.0185831	0.636112	-1.90103	7.57657	CTNNA1;PKN2;MPP5;RHOA
regulation of stem cell population maintenance (GO:2000036)	2/12	0.0441563	0.677417	-2.41717	7.54162	CNOT2;ESRRB
phosphatidylinositol phosphorylation (GO:0046854)	4/28	0.00771685	0.605912	-1.54225	7.50204	PI4KA;TTC7B;PI4KB;IP6K1
regulation of calcium-mediated signaling (GO:0050848)	5/42	0.0065357	0.589712	-1.48535	7.47202	BST1;P2RX5;P2RX4;PDE4D;SLA2
viral process (GO:0016032)	13/221	0.0109384	0.636112	-1.6534	7.46587	NUP214;RPL3;NUP210;GFI1;RPL13A;AP2A2;TBC1D20;RPS18;MVB12B;PI4KA;RPS11;RPL18;DOCK2
regulation of calcium ion transport into cytosol (GO:0010522)	3/23	0.0265742	0.668305	-2.05411	7.45194	P2RX5;P2RX4;UBASH3B
non-motile cilium assembly (GO:1905515)	3/22	0.0235948	0.668305	-1.98583	7.44038	C2CD3;FUZ;BBS4
establishment of spindle localization (GO:0051293)	2/11	0.0374902	0.677417	-2.25857	7.41642	MAP4;KPNB1
response to estradiol (GO:0032355)	4/31	0.0110916	0.636112	-1.64602	7.40967	SOCS2;NRIP1;ESR1;EGFR
maturation of 5.8S rRNA from tricistronic rRNA transcript (SSU-rRNA, 5.8S rRNA, LSU-rRNA) (GO:0000466)	3/20	0.0182119	0.636112	-1.83877	7.36554	PDCD11;EXOSC8;KRI1
regulation of mesenchymal cell proliferation (GO:0010464)	2/13	0.0512221	0.700948	-2.4606	7.31188	FGFR2;TGFBR2
heart looping (GO:0001947)	4/37	0.0203797	0.636112	-1.87392	7.29559	AHI1;DNAAF1;BBS4;TGFBR2
positive regulation of protein serine/threonine kinase activity (GO:0071902)	8/119	0.0204667	0.636112	-1.87577	7.29477	RPTOR;CCND3;CCND1;FLT3;DAB2IP;RASGRP1;RHOA;EGFR
Golgi localization (GO:0051645)	2/13	0.0512221	0.700948	-2.43257	7.22859	RIPOR1;ARCN1
negative regulation of nuclear division (GO:0051784)	2/12	0.0441563	0.677417	-2.30048	7.17753	TOM1L2;DMRT1
determination of heart left/right asymmetry (GO:0061371)	4/41	0.0286098	0.677417	-2.00667	7.13173	AHI1;DNAAF1;BBS4;TGFBR2
protein insertion into membrane (GO:0051205)	2/13	0.0512221	0.700948	-2.37095	7.04549	TRAM2;EGFR
purine ribonucleotide catabolic process (GO:0009154)	3/20	0.0182119	0.636112	-1.75038	7.01147	PDE4D;PDE4B;AMPD3
glutathione biosynthetic process (GO:0006750)	2/12	0.0441563	0.677417	-2.23344	6.96839	GCLC;GSS
regulation of interleukin-2 production (GO:0032663)	3/22	0.0235948	0.668305	-1.8444	6.91046	ANXA1;PDE4D;PDE4B
phosphorylation (GO:0016310)	19/387	0.0154671	0.636112	-1.64936	6.87625	BRSK2;DGKD;MAP3K1;PRKCB;PRKDC;VRK2;STK4;CLK3;TGFBR2;HK1;STK3;GNPTAB;MKNK1;PI4KA;PKN2;IKBKE;RBKS;MAPK4;MAP3K12
regulation of integrin-mediated signaling pathway (GO:2001044)	2/12	0.0441563	0.677417	-2.18634	6.82142	BST1;FLNA
G1/S transition of mitotic cell cycle (GO:0000082)	9/106	0.0032648	0.559818	-1.18737	6.79714	PRIM2;CCND1;GFI1;ORC3;ORC2;RPA2;MCM10;TYMS;BCAT1
regulation of hydrolase activity (GO:0051336)	7/81	0.00823669	0.605912	-1.40015	6.71955	FGD3;FGD5;BRSK2;RABGAP1;DAB2IP;FGD1;PRKG1
mitotic spindle assembly (GO:0090307)	5/47	0.0104989	0.636112	-1.46662	6.68261	KIF2A;FLNA;TUBGCP4;RHOA;KPNB1
positive regulation of T-helper cell differentiation (GO:0045624)	2/12	0.0441563	0.677417	-2.13649	6.66588	CD86;ANXA1
regulation of T-helper 2 cell differentiation (GO:0045628)	2/9	0.025476	0.668305	-1.80736	6.63305	CD86;ANXA1
embryonic heart tube morphogenesis (GO:0003143)	4/41	0.0286098	0.677417	-1.84089	6.54253	AHI1;DNAAF1;BBS4;TGFBR2
cargo loading into vesicle (GO:0035459)	3/28	0.0443126	0.677417	-2.04594	6.37613	TBC1D20;MIA3;SEC24D
melanosome transport (GO:0032402)	2/18	0.0916086	0.713846	-2.63968	6.30943	RAB27A;BBS4
pentose-phosphate shunt (GO:0006098)	2/13	0.0512221	0.700948	-2.10503	6.25527	RPE;RBKS
regulation of insulin receptor signaling pathway (GO:0046626)	4/35	0.0168882	0.636112	-1.5325	6.25433	SOCS2;PTPRE;PID1;PRKCB
negative regulation of protein localization to membrane (GO:1905476)	3/25	0.0331056	0.677417	-1.83005	6.23692	PID1;TMBIM1;PPP2R5A
synaptic vesicle localization (GO:0097479)	2/14	0.0586596	0.713846	-2.19416	6.22264	RAB27A;SPG11
regulation of oligodendrocyte differentiation (GO:0048713)	2/13	0.0512221	0.700948	-2.09217	6.21706	TENM4;DAAM2
ncRNA processing (GO:0034470)	12/228	0.0305281	0.677417	-1.77769	6.20256	BOP1;ZCCHC11;RPL3;PDCD11;RPS18;TEX10;XRN2;EXOSC8;INTS2;RPL13A;RPS11;RPL18
neutrophil degranulation (GO:0043312)	21/480	0.0347497	0.677417	-1.83505	6.16499	PIGR;PYGB;HSP90AB1;UBR4;RAB27A;AMPD3;IQGAP2;AP2A2;ABCA13;RHOA;VAMP8;BST1;PSMD6;PSAP;TMBIM1;HPSE;PLEKHO2;DOCK2;SNAP29;CD44;KPNB1
nonribosomal peptide biosynthetic process (GO:0019184)	2/13	0.0512221	0.700948	-2.06941	6.14943	GCLC;GSS
positive regulation of peptidyl-threonine phosphorylation (GO:0010800)	3/26	0.0366552	0.677417	-1.85357	6.12827	RPTOR;SPHK1;PRKAG2
negative regulation of axon regeneration (GO:0048681)	1/8	0.206214	0.713846	-3.86748	6.10614	CERS2
regulation of lipid metabolic process (GO:0019216)	8/101	0.00817328	0.605912	-1.26956	6.10264	TIAM2;CPT1A;NCOR1;ABCB4;PSAP;PRKAG2;RGL1;BBS4
positive regulation of viral process (GO:0048524)	4/45	0.0385533	0.677417	-1.87365	6.10007	TBC1D20;MDFIC;MVB12B;POLR2I
fatty acid beta-oxidation using acyl-CoA oxidase (GO:0033540)	2/16	0.0745437	0.713846	-2.33554	6.06393	SCP2;ECI2
embryonic skeletal system morphogenesis (GO:0048704)	3/22	0.0235948	0.668305	-1.61487	6.05048	FUZ;FGFR2;TGFBR2
monosaccharide transport (GO:0015749)	2/15	0.066442	0.713846	-2.23086	6.04882	SLC2A9;SLC5A10
calcium-mediated signaling (GO:0019722)	5/71	0.0515217	0.700948	-2.00374	5.9426	SELP;SAMD14;SPHK1;MCTP2;EGFR
pigment granule transport (GO:0051904)	2/18	0.0916086	0.713846	-2.48178	5.93203	RAB27A;BBS4
purine-containing compound salvage (GO:0043101)	2/15	0.066442	0.713846	-2.1842	5.92231	GMPR2;AMPD3
equilibrioception (GO:0050957)	1/7	0.182961	0.713846	-3.48159	5.91341	CDH23
regulation of transcription involved in G1/S transition of mitotic cell cycle (GO:0000083)	3/27	0.0403916	0.677417	-1.83842	5.89974	GFI1;ESRRB;TYMS
negative regulation of ERBB signaling pathway (GO:1901185)	4/44	0.0359048	0.677417	-1.76479	5.87124	SH3KBP1;DAB2IP;EPS15L1;EGFR
negative regulation of transcription, DNA-templated (GO:0045892)	33/814	0.0266868	0.668305	-1.61059	5.83611	NFIX;ZC3H4;GFI1;IKZF1;SLA2;FAM129B;DCAF1;BCL7A;SUMO1;CUX1;CCND1;NRIP1;ORC2;FLNA;CIC;BTRC;POU2F1;SEMA4D;DMRT1;DAB2IP;ARID5B;FOXN3;ESR1;RUNX2;FOXP1;GCLC;NR6A1;NCOR1;MDFIC;CNOT2;DNAJA3;MXD1;FGFR2
positive regulation of NF-kappaB import into nucleus (GO:0042346)	2/16	0.0745437	0.713846	-2.23718	5.80856	SPHK1;RHOA
negative regulation of kinase activity (GO:0033673)	7/92	0.0159305	0.636112	-1.39706	5.78317	SOCS2;UBASH3B;GNAQ;PRKAG2;PPP2R5A;CEP85;SOCS6
regulation of retrograde protein transport, ER to cytosol (GO:1904152)	2/13	0.0512221	0.700948	-1.94222	5.77148	BRSK2;OS9
positive regulation of phosphorylation (GO:0042327)	11/209	0.0373037	0.677417	-1.74964	5.75396	CCND3;PFKFB3;SEMA4D;CCND1;FLT3;FAM129A;STK4;RASGRP1;ACVR2A;FGFR2;EGFR
purine-containing compound metabolic process (GO:0072521)	2/18	0.0916086	0.713846	-2.40588	5.7506	SLC2A9;FHIT
intracellular lipid transport (GO:0032365)	2/16	0.0745437	0.713846	-2.20407	5.72258	CPT1A;PRKAG2
hyaluronan catabolic process (GO:0030214)	2/17	0.0829403	0.713846	-2.29827	5.72185	HEXA;CD44
lamellipodium organization (GO:0097581)	3/26	0.0366552	0.677417	-1.72439	5.70116	SPATA13;ARHGEF4;ARHGEF6
receptor clustering (GO:0043113)	3/25	0.0331056	0.677417	-1.6725	5.69998	PIGR;DNAJA3;FLNA
monoamine transport (GO:0015844)	1/7	0.182961	0.713846	-3.32792	5.65241	SLC18A2
DNA-dependent DNA replication (GO:0006261)	5/57	0.0227764	0.668305	-1.49283	5.64594	RPAIN;PRIM2;ORC3;ORC2;MCM10
regulation of protein targeting (GO:1903533)	1/7	0.182961	0.713846	-3.3194	5.63794	SREBF1
regulation of delayed rectifier potassium channel activity (GO:1902259)	2/16	0.0745437	0.713846	-2.17053	5.63549	SUMO1;RNF207
neutrophil mediated immunity (GO:0002446)	21/488	0.040307	0.677417	-1.74229	5.59491	PIGR;PYGB;HSP90AB1;UBR4;RAB27A;AMPD3;IQGAP2;AP2A2;ABCA13;RHOA;VAMP8;BST1;PSMD6;PSAP;TMBIM1;HPSE;PLEKHO2;DOCK2;SNAP29;CD44;KPNB1
regulation of cilium assembly (GO:1902017)	3/28	0.0443126	0.677417	-1.79179	5.58409	FUZ;TAPT1;BBS4
regulation of epidermal growth factor receptor signaling pathway (GO:0042058)	5/59	0.0260164	0.668305	-1.53024	5.5839	SH3KBP1;MVB12B;DAB2IP;EPS15L1;EGFR
negative regulation of protein modification process (GO:0031400)	5/64	0.0353563	0.677417	-1.66871	5.5773	CRTAP;PID1;PRKDC;FAM129A;DAB2IP
cellular response to osmotic stress (GO:0071470)	2/15	0.066442	0.713846	-2.05141	5.56224	RCSD1;MYLK
cellular response to estradiol stimulus (GO:0071392)	3/21	0.0208074	0.636112	-1.42424	5.5153	NRIP1;ESR1;EGFR
positive regulation of GTPase activity (GO:0043547)	12/193	0.00942076	0.636112	-1.17609	5.48627	TBC1D1;RABGAP1L;RABGAP1;SEMA4D;TBC1D20;RASGRF1;TBC1D2B;SRGAP2;TBC1D17;RASGRP1;TBC1D22A;ARHGAP23
positive regulation of cyclin-dependent protein serine/threonine kinase activity (GO:0045737)	3/31	0.0571552	0.713846	-1.91351	5.47643	CCND3;CCND1;EGFR
regulation of response to interferon-gamma (GO:0060330)	2/15	0.066442	0.713846	-2.01039	5.45102	HSP90AB1;SUMO1
negative regulation of protein kinase activity (GO:0006469)	8/110	0.0133042	0.636112	-1.25906	5.43871	SOCS2;UBASH3B;GNAQ;SH3BP5;DAB2IP;PRKAG2;CEP85;SOCS6
mitotic G1/S transition checkpoint (GO:0044819)	2/11	0.0374902	0.677417	-1.64563	5.40373	CCND1;RPA2
actin cytoskeleton reorganization (GO:0031532)	5/62	0.0314041	0.677417	-1.56035	5.40007	BRSK2;ANXA1;FLNA;FRYL;RHOA
cotranslational protein targeting to membrane (GO:0006613)	7/94	0.0177427	0.636112	-1.33613	5.387	TRAM1;RPL3;RPS18;RPL13A;RPS11;RPL18;SEC63
negative regulation of GTPase activity (GO:0034260)	3/23	0.0265742	0.668305	-1.48379	5.38293	ARFGEF1;GPSM1;DAB2IP
mitotic nuclear division (GO:0140014)	5/75	0.0624103	0.713846	-1.93671	5.37249	KIF2A;FLNA;TUBGCP4;RHOA;KPNB1
negative regulation of epidermal growth factor receptor signaling pathway (GO:0042059)	4/41	0.0286098	0.677417	-1.5114	5.37153	SH3KBP1;DAB2IP;EPS15L1;EGFR
synaptic vesicle transport (GO:0048489)	2/18	0.0916086	0.713846	-2.24524	5.36663	RAB27A;SPG11
protein localization to microtubule organizing center (GO:1905508)	2/17	0.0829403	0.713846	-2.1481	5.34798	C2CD3;BBS4
leukocyte differentiation (GO:0002521)	2/14	0.0586596	0.713846	-1.87199	5.30897	FLT3;IKZF1
SRP-dependent cotranslational protein targeting to membrane (GO:0006614)	6/90	0.0433186	0.677417	-1.68837	5.30009	RPL3;RPS18;RPL13A;RPS11;RPL18;SEC63
regulation of reactive oxygen species biosynthetic process (GO:1903426)	2/17	0.0829403	0.713846	-2.11682	5.2701	RAB27A;SLC18A2
mitotic spindle organization (GO:0007052)	6/75	0.019886	0.636112	-1.34357	5.26376	KIF2A;FLNA;TUBGCP4;MAP4;RHOA;KPNB1
negative chemotaxis (GO:0050919)	3/27	0.0403916	0.677417	-1.63904	5.25991	SEMA4D;SLIT1;RHOA
transcription initiation from RNA polymerase II promoter (GO:0006367)	9/161	0.0410268	0.677417	-1.6376	5.22972	NR6A1;THRB;CCND1;ESRRB;MAML3;NR2C2;POLR2I;ESR1;RUNX2
negative regulation of small GTPase mediated signal transduction (GO:0051058)	3/28	0.0443126	0.677417	-1.67357	5.21567	SYNGAP1;RASA1;DAB2IP
establishment of melanosome localization (GO:0032401)	2/19	0.100526	0.713846	-2.26996	5.21487	RAB27A;BBS4
regulation of protein localization to plasma membrane (GO:1903076)	5/68	0.0441452	0.677417	-1.66152	5.1844	VAMP8;PID1;TMBIM1;PPP2R5A;EGFR
peptidyl-serine phosphorylation (GO:0018105)	9/146	0.0239473	0.668305	-1.38218	5.15817	PRKCB;PRKDC;MKNK1;PKN2;VRK2;STK4;IKBKE;TGFBR2;MAP3K12
positive regulation of reactive oxygen species biosynthetic process (GO:1903428)	3/31	0.0571552	0.713846	-1.79517	5.13775	P2RX4;HSP90AB1;RAB27A
peptidyl-serine modification (GO:0018209)	10/171	0.0247331	0.668305	-1.38401	5.12032	GALNT7;PRKCB;PRKDC;MKNK1;PKN2;VRK2;STK4;IKBKE;TGFBR2;MAP3K12
positive regulation of vesicle fusion (GO:0031340)	1/7	0.182961	0.713846	-3.00406	5.10234	ANXA1
regulation of glucose transport (GO:0010827)	2/17	0.0829403	0.713846	-2.04936	5.10216	PRKCB;PRKAG2
hexose transport (GO:0008645)	2/17	0.0829403	0.713846	-2.0428	5.08583	SLC2A9;SLC5A10
leukocyte tethering or rolling (GO:0050901)	2/17	0.0829403	0.713846	-2.04064	5.08045	SELP;SELPLG
ribose phosphate metabolic process (GO:0019693)	2/13	0.0512221	0.700948	-1.70939	5.07961	RPE;RBKS
embryonic cranial skeleton morphogenesis (GO:0048701)	2/16	0.0745437	0.713846	-1.95299	5.0707	FGFR2;TGFBR2
protein targeting to ER (GO:0045047)	6/98	0.0608545	0.713846	-1.80946	5.06517	RPL3;RPS18;RPL13A;RPS11;RPL18;SEC63
cytoskeleton-dependent cytokinesis (GO:0061640)	6/71	0.0155388	0.636112	-1.21362	5.054	SON;RASA1;KIF20A;MYH10;BBS4;RHOA
viral transcription (GO:0019083)	7/114	0.044317	0.677417	-1.62046	5.04999	NUP214;RPL3;NUP210;RPS18;RPL13A;RPS11;RPL18
regulation of cell cycle checkpoint (GO:1901976)	1/7	0.182961	0.713846	-2.96308	5.03274	RPA2
cilium organization (GO:0044782)	11/193	0.0225902	0.668305	-1.3244	5.01981	AHI1;TMEM67;DNAAF1;FLNA;POC1B;TRIM59;FUZ;WDPCP;MNS1;SNAP29;BBS4
regulation of lipase activity (GO:0060191)	2/15	0.066442	0.713846	-1.84598	5.00523	LIPC;RHOA
gland morphogenesis (GO:0022612)	1/7	0.182961	0.713846	-2.92912	4.97506	FGFR2
regulation of apoptotic process (GO:0042981)	32/816	0.0423086	0.677417	-1.57136	4.96985	FLT3;PRKDC;HTRA2;STK4;FGD1;EGFR;FAM129B;STK3;FGD3;SOCS2;AKAP13;TRIM2;FLNA;BID;MAP3K1;ANXA1;SEMA4D;SPHK1;DAB2IP;ATAD3A;TIAM2;AHI1;GCLC;SON;RASA1;DNAJA3;ARHGEF3;ARHGEF4;IL6ST;CD44;FGFR2;ARHGEF6
positive regulation of small GTPase mediated signal transduction (GO:0051057)	2/16	0.0745437	0.713846	-1.91198	4.9642	RASGRF1;RASGRP1
negative regulation of RNA metabolic process (GO:0051253)	2/16	0.0745437	0.713846	-1.90689	4.951	NCOR1;ESR1
regulation of embryonic development (GO:0045995)	3/30	0.0526974	0.708856	-1.67894	4.94145	RNF207;WDPCP;FAM129B
cellular response to lipid (GO:0071396)	11/179	0.0136706	0.636112	-1.14929	4.93332	CD86;PID1;GFI1;ABCB4;NRIP1;DAB2IP;PDE4B;HTRA2;ESR1;RHOA;EGFR
glucose transmembrane transport (GO:1904659)	2/17	0.0829403	0.713846	-1.97174	4.90891	SLC2A9;SLC5A10
positive regulation of dendrite development (GO:1900006)	3/33	0.0665842	0.713846	-1.80619	4.8935	CUX1;DAB2IP;SHANK2
establishment of protein localization to organelle (GO:0072594)	4/63	0.10436	0.713846	-2.1652	4.89315	NUP214;RPAIN;KPNB1;HK1
melanosome localization (GO:0032400)	2/21	0.119027	0.713846	-2.29729	4.88958	RAB27A;BBS4
negative regulation of epithelial to mesenchymal transition (GO:0010719)	3/26	0.0366552	0.677417	-1.46531	4.8446	DAB2IP;FUZ;LDLRAD4
nucleobase-containing small molecule interconversion (GO:0015949)	3/32	0.0617853	0.713846	-1.73885	4.84111	NME7;GSR;TYMS
hexose transmembrane transport (GO:0035428)	2/20	0.109672	0.713846	-2.19029	4.8411	SLC2A9;SLC5A10
regulation of RNA metabolic process (GO:0051252)	4/40	0.0263935	0.668305	-1.33074	4.83677	MBNL1;SON;RASA1;CLK3
Rho protein signal transduction (GO:0007266)	6/73	0.0176206	0.636112	-1.19438	4.82374	RHOT2;RIPOR1;CDC42EP4;RHOBTB3;ARHGEF3;RHOA
mitotic cytokinesis (GO:0000281)	5/60	0.0277411	0.677417	-1.34318	4.81508	SON;RASA1;KIF20A;MYH10;BBS4
cell cycle G1/S phase transition (GO:0044843)	7/93	0.0168194	0.636112	-1.17491	4.79977	PRIM2;CCND1;ORC3;ORC2;RPA2;MCM10;BCAT1
regulation of smooth muscle cell differentiation (GO:0051150)	1/8	0.206214	0.713846	-3.03819	4.79682	FGFR2
ceramide transport (GO:0035627)	1/7	0.182961	0.713846	-2.81424	4.77993	PSAP
viral gene expression (GO:0019080)	7/111	0.0392723	0.677417	-1.47285	4.76797	NUP214;RPL3;NUP210;RPS18;RPL13A;RPS11;RPL18
negative regulation of meiotic cell cycle (GO:0051447)	1/7	0.182961	0.713846	-2.8066	4.76696	DMRT1
snRNA metabolic process (GO:0016073)	2/19	0.100526	0.713846	-2.0639	4.74147	INTS2;RPAP2
regulation of fatty acid oxidation (GO:0046320)	2/14	0.0586596	0.713846	-1.66802	4.7305	PRKAG2;LONP2
leukocyte adhesion to vascular endothelial cell (GO:0061756)	2/17	0.0829403	0.713846	-1.89849	4.72653	SELP;SELPLG
positive regulation of cell cycle (GO:0045787)	6/83	0.0309096	0.677417	-1.35838	4.72267	CCND3;HSP90AB1;CCND1;SPHK1;PKN2;FGFR2
embryo development ending in birth or egg hatching (GO:0009792)	2/18	0.0916086	0.713846	-1.96795	4.70385	STOX2;CELF4
negative regulation of oligodendrocyte differentiation (GO:0048715)	1/7	0.182961	0.713846	-2.76682	4.69939	DAAM2
establishment of mitochondrion localization, microtubule-mediated (GO:0034643)	1/7	0.182961	0.713846	-2.76074	4.68907	RHOT2
regulation of non-motile cilium assembly (GO:1902855)	1/7	0.182961	0.713846	-2.76067	4.68895	MAP4
positive regulation of calcium ion transport (GO:0051928)	3/34	0.0715478	0.713846	-1.77158	4.67234	P2RX5;P2RX4;MYLK
positive regulation of cholesterol transport (GO:0032376)	2/18	0.0916086	0.713846	-1.94752	4.65503	SCP2;ABCB4
bile acid and bile salt transport (GO:0015721)	3/31	0.0571552	0.713846	-1.62412	4.64821	SLC10A1;ABCB4;SLCO2B1
viral life cycle (GO:0019058)	7/108	0.0346187	0.677417	-1.38105	4.64496	VAMP8;NUP214;HSP90AB1;TBC1D20;NUP210;MVB12B;KPNB1
interphase microtubule nucleation by interphase microtubule organizing center (GO:0051415)	1/7	0.182961	0.713846	-2.7243	4.62717	TUBGCP4
positive regulation of phospholipid transport (GO:2001140)	1/7	0.182961	0.713846	-2.72224	4.62368	ABCB4
rRNA metabolic process (GO:0016072)	10/201	0.0621418	0.713846	-1.65381	4.59485	BOP1;RPL3;PDCD11;RPS18;TEX10;XRN2;EXOSC8;RPL13A;RPS11;RPL18
aggrephagy (GO:0035973)	1/7	0.182961	0.713846	-2.69789	4.58232	WDFY3
regulation of meiotic nuclear division (GO:0040020)	1/8	0.206214	0.713846	-2.89959	4.57799	DMRT1
retina homeostasis (GO:0001895)	3/39	0.09869	0.713846	-1.96631	4.55353	PIGR;POC1B;BBS4
leptin-mediated signaling pathway (GO:0033210)	1/9	0.228806	0.713846	-3.08226	4.54596	BBS4
anterograde axonal transport (GO:0008089)	3/32	0.0617853	0.713846	-1.63047	4.53939	AP3M1;KIF1B;TRAK1
cellular response to chemokine (GO:1990869)	1/7	0.182961	0.713846	-2.66594	4.52805	RHOA
protein retention in ER lumen (GO:0006621)	1/7	0.182961	0.713846	-2.65934	4.51685	OS9
activation of signaling protein activity involved in unfolded protein response (GO:0006987)	1/8	0.206214	0.713846	-2.8398	4.48359	DAB2IP
regulation of protein phosphorylation (GO:0001932)	14/262	0.0183065	0.636112	-1.11924	4.47753	PID1;SEMA4D;PRKDC;ULK4;FAM129A;DAB2IP;VRK2;STK4;RASGRP1;ACVR2A;EGFR;BST1;CCND3;CCND1
vesicle fusion with Golgi apparatus (GO:0048280)	1/7	0.182961	0.713846	-2.63023	4.4674	VTI1A
positive regulation of extrinsic apoptotic signaling pathway (GO:2001238)	3/29	0.0484155	0.700948	-1.47509	4.46648	PPP2R1B;HTRA2;BID
alpha-beta T cell activation (GO:0046631)	1/7	0.182961	0.713846	-2.62714	4.46214	ANXA1
positive regulation of T-helper 2 cell differentiation (GO:0045630)	1/7	0.182961	0.713846	-2.62188	4.45322	CD86
purine ribonucleoside monophosphate catabolic process (GO:0009169)	1/7	0.182961	0.713846	-2.61761	4.44596	AMPD3
response to purine-containing compound (GO:0014074)	2/18	0.0916086	0.713846	-1.85833	4.44183	DUOX1;P2RX4
bile acid secretion (GO:0032782)	1/7	0.182961	0.713846	-2.61049	4.43387	ABCB4
regulation of phosphatidylinositol 3-kinase signaling (GO:0014066)	6/81	0.0278482	0.677417	-1.23713	4.43014	SELP;SEMA4D;FLT3;DAB2IP;FBXL2;EGFR
neurotransmitter loading into synaptic vesicle (GO:0098700)	1/7	0.182961	0.713846	-2.60578	4.42587	SLC18A2
kynurenine metabolic process (GO:0070189)	1/9	0.228806	0.713846	-2.99655	4.41955	KMO
regulation of fat cell proliferation (GO:0070344)	1/7	0.182961	0.713846	-2.59856	4.41361	PID1
negative regulation of neuron projection regeneration (GO:0070571)	1/9	0.228806	0.713846	-2.98263	4.39901	CERS2
myeloid dendritic cell activation (GO:0001773)	2/15	0.066442	0.713846	-1.61919	4.39032	DOCK2;TGFBR2
error-prone translesion synthesis (GO:0042276)	2/21	0.119027	0.713846	-2.05909	4.38259	POLI;RPA2
cellular response to hydroxyurea (GO:0072711)	1/8	0.206214	0.713846	-2.77208	4.37668	SPIDR
regulation of wound healing (GO:0061041)	3/35	0.0766721	0.713846	-1.70408	4.37645	ARFGEF1;ANXA1;MYLK
positive regulation of phospholipase C activity (GO:0010863)	3/31	0.0571552	0.713846	-1.5275	4.37169	GNAQ;ESR1;EGFR
negative regulation of mRNA catabolic process (GO:1902373)	1/7	0.182961	0.713846	-2.55688	4.34281	NBAS
positive regulation of protein import into nucleus, translocation (GO:0033160)	1/7	0.182961	0.713846	-2.55104	4.3329	UBR5
error-free translesion synthesis (GO:0070987)	2/20	0.109672	0.713846	-1.94905	4.3079	RPA2;RCHY1
regulation of epithelial to mesenchymal transition involved in endocardial cushion formation (GO:1905005)	1/7	0.182961	0.713846	-2.52173	4.28311	TGFBR2
positive regulation of osteoblast differentiation (GO:0045669)	3/36	0.0819529	0.713846	-1.71135	4.28112	IL6ST;ACVR2A;RUNX2
astral microtubule organization (GO:0030953)	1/7	0.182961	0.713846	-2.52021	4.28053	KPNB1
positive regulation of organelle assembly (GO:1902117)	4/48	0.0471518	0.698084	-1.39948	4.27454	CNOT2;FUZ;TAPT1;BBS4
protein autophosphorylation (GO:0046777)	9/176	0.0648817	0.713846	-1.5612	4.27019	EEF2K;FLT3;MKNK1;VRK2;STK4;SLA2;FGFR2;EGFR;MAP3K12
regulation of mitochondrion organization (GO:0010821)	4/49	0.0502352	0.700948	-1.4264	4.26641	SREBF1;RHOT2;PID1;HTRA2
corticosteroid receptor signaling pathway (GO:0031958)	1/7	0.182961	0.713846	-2.51179	4.26623	ARID1A
negative regulation of cell size (GO:0045792)	1/7	0.182961	0.713846	-2.509	4.26148	RHOA
pyrimidine deoxyribonucleotide biosynthetic process (GO:0009221)	1/7	0.182961	0.713846	-2.50759	4.25909	TYMS
bone development (GO:0060348)	3/35	0.0766721	0.713846	-1.65431	4.24862	AKAP13;DYM;FGFR2
positive regulation of interferon-gamma secretion (GO:1902715)	1/7	0.182961	0.713846	-2.487	4.22413	RASGRP1
negative regulation of cyclase activity (GO:0031280)	2/21	0.119027	0.713846	-1.98444	4.22369	GABBR2;GNAI2
G2 DNA damage checkpoint (GO:0031572)	3/33	0.0665842	0.713846	-1.55872	4.22301	FOXN3;STK4;STK3
purine ribonucleoside triphosphate biosynthetic process (GO:0009206)	2/28	0.188834	0.713846	-2.52205	4.20397	ATP5B;PRKAG2
negative regulation of muscle hypertrophy (GO:0014741)	1/8	0.206214	0.713846	-2.65999	4.1997	P2RX4
heparan sulfate proteoglycan biosynthetic process, enzymatic modification (GO:0015015)	1/7	0.182961	0.713846	-2.46675	4.18973	HS2ST1
positive regulation of activin receptor signaling pathway (GO:0032927)	1/7	0.182961	0.713846	-2.46117	4.18025	ACVR2A
regulation of muscle cell differentiation (GO:0051147)	3/37	0.0873859	0.713846	-1.70674	4.16005	CTNNA1;CTNNA2;FGFR2
glyceraldehyde-3-phosphate metabolic process (GO:0019682)	2/19	0.100526	0.713846	-1.81066	4.15969	RPE;RBKS
collagen biosynthetic process (GO:0032964)	1/7	0.182961	0.713846	-2.4392	4.14293	TRAM2
regulation of high voltage-gated calcium channel activity (GO:1901841)	1/8	0.206214	0.713846	-2.6225	4.1405	PDE4B
mitotic DNA damage checkpoint (GO:0044773)	3/40	0.104552	0.713846	-1.83157	4.13582	CCND1;RPA2;FOXN3
cell morphogenesis (GO:0000902)	4/60	0.0911141	0.713846	-1.72444	4.13114	TENM4;STK4;FRYL;CDH8
DNA packaging (GO:0006323)	2/18	0.0916086	0.713846	-1.72678	4.1274	CDAN1;HAT1
NADP metabolic process (GO:0006739)	2/20	0.109672	0.713846	-1.86617	4.12471	RPE;RBKS
choline catabolic process (GO:0042426)	1/7	0.182961	0.713846	-2.41949	4.10947	CHDH
regulation of double-strand break repair (GO:2000779)	3/35	0.0766721	0.713846	-1.59245	4.08975	UBR5;RPA2;SPIDR
positive regulation of phospholipase activity (GO:0010518)	2/20	0.109672	0.713846	-1.8495	4.08788	ESR1;FGFR2
mitochondrial transmembrane transport (GO:1990542)	3/33	0.0665842	0.713846	-1.5086	4.08724	CPT1A;UCP2;PRKAG2
regulation of osteoblast differentiation (GO:0045667)	5/70	0.0489877	0.700948	-1.35506	4.08711	SEMA4D;IL6ST;ACVR2A;FGFR2;RUNX2
adrenergic receptor signaling pathway (GO:0071875)	2/21	0.119027	0.713846	-1.91843	4.08321	AKAP13;PDE4D
molybdopterin cofactor metabolic process (GO:0043545)	1/8	0.206214	0.713846	-2.58219	4.07686	NFS1
ear development (GO:0043583)	1/7	0.182961	0.713846	-2.38837	4.05661	ECE1
regulation by virus of viral protein levels in host cell (GO:0046719)	1/8	0.206214	0.713846	-2.56871	4.05558	TBC1D20
regulation of collateral sprouting (GO:0048670)	1/8	0.206214	0.713846	-2.56779	4.05413	SEMA4D
positive regulation of osteoblast proliferation (GO:0033690)	1/7	0.182961	0.713846	-2.37645	4.03636	HPSE
granulocyte migration (GO:0097530)	1/8	0.206214	0.713846	-2.55517	4.03421	ANXA1
positive regulation of skeletal muscle fiber development (GO:0048743)	1/7	0.182961	0.713846	-2.36776	4.0216	FAM129B
endonucleolytic cleavage in ITS1 to separate SSU-rRNA from 5.8S rRNA and LSU-rRNA from tricistronic rRNA transcript (SSU-rRNA, 5.8S rRNA, LSU-rRNA) (GO:0000447)	1/8	0.206214	0.713846	-2.54485	4.01791	KRI1
regulation of protein localization (GO:0032880)	3/42	0.116671	0.713846	-1.86489	4.00651	RABGAP1L;SUMO1;WDPCP
regulation of organelle organization (GO:0033043)	7/114	0.044317	0.677417	-1.28555	4.00626	TBC1D1;RABGAP1L;RHOT2;RABGAP1;TBC1D2B;TBC1D17;TBC1D22A
positive regulation of transcription factor import into nucleus (GO:0042993)	3/33	0.0665842	0.713846	-1.47823	4.00495	SPHK1;FLNA;RHOA
mitochondrial DNA metabolic process (GO:0032042)	1/8	0.206214	0.713846	-2.53441	4.00143	LONP1
positive regulation of ATP biosynthetic process (GO:2001171)	1/7	0.182961	0.713846	-2.34439	3.9819	PID1
response to interferon-beta (GO:0035456)	2/20	0.109672	0.713846	-1.80112	3.98093	HTRA2;IKBKE
regulation of establishment of protein localization (GO:0070201)	1/8	0.206214	0.713846	-2.51842	3.97618	SPIDR
determination of digestive tract left/right asymmetry (GO:0071907)	1/8	0.206214	0.713846	-2.51551	3.97159	DNAAF1
protein localization to centrosome (GO:0071539)	2/19	0.100526	0.713846	-1.72369	3.95989	C2CD3;BBS4
organic substance transport (GO:0071702)	6/88	0.0394989	0.677417	-1.22418	3.95593	CUBN;SLC22A14;SCP2;PSAP;ABCA13;SLC18A2
response to chemokine (GO:1990868)	1/7	0.182961	0.713846	-2.32021	3.94083	RHOA
positive regulation of mitochondrial membrane permeability involved in apoptotic process (GO:1902110)	1/9	0.228806	0.713846	-2.66516	3.93079	RHOT2
regulation of glycolytic process (GO:0006110)	4/58	0.0827623	0.713846	-1.57403	3.92213	NUP214;PFKFB3;NUP210;PRKAG2
catecholamine transport (GO:0051937)	1/7	0.182961	0.713846	-2.3083	3.9206	SLC18A2
DNA-templated transcription, initiation (GO:0006352)	10/187	0.0417779	0.677417	-1.23418	3.919	NR6A1;THRB;DMTF1;CCND1;ESRRB;MAML3;NR2C2;POLR2I;ESR1;RUNX2
B cell activation (GO:0042113)	5/74	0.0595754	0.713846	-1.3879	3.91459	DCAF1;CR2;PRKCB;FLT3;RAG2
negative regulation of bone resorption (GO:0045779)	1/7	0.182961	0.713846	-2.30421	3.91365	UBASH3B
intracellular steroid hormone receptor signaling pathway (GO:0030518)	5/67	0.0418364	0.677417	-1.23206	3.91054	NR6A1;UBR5;NRIP1;ARID1A;ESR1
TORC1 signaling (GO:0038202)	1/9	0.228806	0.713846	-2.65042	3.90905	RPTOR
positive regulation of blood coagulation (GO:0030194)	2/20	0.109672	0.713846	-1.76807	3.9079	SELP;HPSE
negative regulation of lyase activity (GO:0051350)	2/23	0.138284	0.713846	-1.97234	3.90218	GABBR2;GNAI2
positive regulation of IRE1-mediated unfolded protein response (GO:1903896)	1/9	0.228806	0.713846	-2.64114	3.89536	DAB2IP
bleb assembly (GO:0032060)	1/8	0.206214	0.713846	-2.45431	3.87496	MYLK
regulation of mitochondrial fusion (GO:0010635)	1/8	0.206214	0.713846	-2.45141	3.87038	PID1
smooth muscle tissue development (GO:0048745)	1/7	0.182961	0.713846	-2.27711	3.86764	MYLK
regulation of coenzyme metabolic process (GO:0051196)	3/40	0.104552	0.713846	-1.71093	3.8634	NUP214;NUP210;PRKAG2
regulation of interleukin-12 secretion (GO:2001182)	1/7	0.182961	0.713846	-2.27026	3.85599	FOXP1
monocyte activation (GO:0042117)	1/9	0.228806	0.713846	-2.60809	3.84662	FOXP1
regulation of vitamin D biosynthetic process (GO:0060556)	1/8	0.206214	0.713846	-2.43446	3.84362	GFI1
positive regulation of adaptive immune response (GO:0002821)	1/7	0.182961	0.713846	-2.26163	3.84134	IL6ST
steroid hormone mediated signaling pathway (GO:0043401)	2/21	0.119027	0.713846	-1.79954	3.83015	NR6A1;ESR1
long term synaptic depression (GO:0060292)	1/7	0.182961	0.713846	-2.25163	3.82435	SHANK2
lymphoid progenitor cell differentiation (GO:0002320)	1/7	0.182961	0.713846	-2.24911	3.82008	FLT3
negative regulation of B cell apoptotic process (GO:0002903)	1/8	0.206214	0.713846	-2.40957	3.80432	FOXP1
rRNA processing (GO:0006364)	10/203	0.0654957	0.713846	-1.3953	3.80327	BOP1;RPL3;PDCD11;RPS18;TEX10;XRN2;EXOSC8;RPL13A;RPS11;RPL18
benzene-containing compound metabolic process (GO:0042537)	1/9	0.228806	0.713846	-2.57354	3.79566	KMO
nuclear import (GO:0051170)	5/72	0.054131	0.713846	-1.3006	3.793	NUP214;RPAIN;GEMIN5;BACH2;KPNB1
neutrophil activation involved in immune response (GO:0002283)	21/484	0.0374521	0.677417	-1.15234	3.78509	PIGR;PYGB;HSP90AB1;UBR4;RAB27A;AMPD3;IQGAP2;AP2A2;ABCA13;RHOA;VAMP8;BST1;PSMD6;PSAP;TMBIM1;HPSE;PLEKHO2;DOCK2;SNAP29;CD44;KPNB1
regulation of cytokine-mediated signaling pathway (GO:0001959)	6/91	0.0453123	0.68375	-1.22097	3.77791	HSP90AB1;SUMO1;SPHK1;RBCK1;VRK2;USP18
negative regulation of biosynthetic process (GO:0009890)	1/9	0.228806	0.713846	-2.55707	3.77137	SLC18A2
regulation of cell migration (GO:0030334)	15/317	0.0384869	0.677417	-1.15521	3.76303	RIPOR1;ANXA1;SEMA4D;SPHK1;ULK4;FUZ;MIA3;LDLRAD4;RHOA;EGFR;MYLK;KIF2A;SPATA13;FLNA;SRGAP2
hyaluronan metabolic process (GO:0030212)	2/22	0.12857	0.713846	-1.83375	3.76154	HEXA;CD44
regulation of cell division (GO:0051302)	4/66	0.118428	0.713846	-1.76008	3.75505	ESRRB;KIF20A;FGFR2;BBS4
glucose 6-phosphate metabolic process (GO:0051156)	2/17	0.0829403	0.713846	-1.50806	3.75451	RPE;RBKS
regulation of blood vessel remodeling (GO:0060312)	1/7	0.182961	0.713846	-2.20503	3.7452	TMBIM1
heparan sulfate proteoglycan metabolic process (GO:0030201)	2/21	0.119027	0.713846	-1.7592	3.7443	HPSE;HS2ST1
negative regulation of cAMP biosynthetic process (GO:0030818)	2/22	0.12857	0.713846	-1.81984	3.73301	GABBR2;GNAI2
tRNA catabolic process (GO:0016078)	1/7	0.182961	0.713846	-2.19558	3.72916	EXOSC8
negative regulation of transforming growth factor beta production (GO:0071635)	1/7	0.182961	0.713846	-2.19481	3.72784	HSP90AB1
regulation of response to biotic stimulus (GO:0002831)	1/8	0.206214	0.713846	-2.35888	3.72429	FOXP1
AMP metabolic process (GO:0046033)	1/8	0.206214	0.713846	-2.35747	3.72207	AMPD3
response to hydroxyurea (GO:0072710)	1/9	0.228806	0.713846	-2.5178	3.71345	SPIDR
establishment of protein localization to peroxisome (GO:0072663)	1/8	0.206214	0.713846	-2.35087	3.71164	LONP2
macropinocytosis (GO:0044351)	1/7	0.182961	0.713846	-2.18358	3.70876	DOCK2
regulation of metaphase/anaphase transition of cell cycle (GO:1902099)	1/9	0.228806	0.713846	-2.51367	3.70737	HECW2
regulation of peptidyl-serine phosphorylation (GO:0033135)	5/87	0.102169	0.713846	-1.62197	3.69992	RPTOR;PDE4D;STK4;CD44;EGFR
intracellular transport of virus (GO:0075733)	4/55	0.0709829	0.713846	-1.39842	3.69926	NUP214;NUP210;MVB12B;KPNB1
lymphocyte differentiation (GO:0030098)	5/74	0.0595754	0.713846	-1.31077	3.69706	DCAF1;CR2;FLT3;IKZF1;RAG2
negative regulation of cilium assembly (GO:1902018)	1/9	0.228806	0.713846	-2.49572	3.68089	MAP4
outflow tract septum morphogenesis (GO:0003148)	2/23	0.138284	0.713846	-1.85925	3.67843	FGFR2;TGFBR2
protein autoprocessing (GO:0016540)	1/10	0.250757	0.713846	-2.65848	3.67741	HTRA2
ncRNA catabolic process (GO:0034661)	2/23	0.138284	0.713846	-1.85859	3.67713	ZCCHC11;EXOSC8
bone cell development (GO:0098751)	1/8	0.206214	0.713846	-2.31987	3.66271	FOXP1
second-messenger-mediated signaling (GO:0019932)	4/63	0.10436	0.713846	-1.6199	3.66082	SAMD14;DGKD;SPHK1;MCTP2
cellular hyperosmotic response (GO:0071474)	1/7	0.182961	0.713846	-2.15506	3.66033	RCSD1
cleavage furrow formation (GO:0036089)	1/8	0.206214	0.713846	-2.31729	3.65863	RHOA
positive regulation of protein glycosylation (GO:0060050)	1/7	0.182961	0.713846	-2.15303	3.65689	ARFGEF1
nuclear polyadenylation-dependent rRNA catabolic process (GO:0071035)	1/7	0.182961	0.713846	-2.15083	3.65315	EXOSC8
positive regulation of cell division (GO:0051781)	3/42	0.116671	0.713846	-1.69742	3.64672	PKN2;FGFR2;RHOA
negative regulation of phospholipid metabolic process (GO:1903726)	1/7	0.182961	0.713846	-2.14512	3.64345	DAB2IP
B cell differentiation (GO:0030183)	4/53	0.0636438	0.713846	-1.31961	3.6348	DCAF1;CR2;FLT3;RAG2
regulation of cardiac muscle hypertrophy (GO:0010611)	2/22	0.12857	0.713846	-1.77162	3.63409	P2RX4;IL6ST
regulation of atrial cardiac muscle cell membrane repolarization (GO:0060372)	1/8	0.206214	0.713846	-2.30125	3.6333	FLNA
posttranslational protein targeting to endoplasmic reticulum membrane (GO:0006620)	1/8	0.206214	0.713846	-2.30112	3.6331	SEC63
chaperone-mediated protein complex assembly (GO:0051131)	2/18	0.0916086	0.713846	-1.51753	3.62726	HSP90AB1;LONP1
energy reserve metabolic process (GO:0006112)	2/22	0.12857	0.713846	-1.768	3.62668	PID1;PRKAG2
lipid biosynthetic process (GO:0008610)	5/73	0.0568156	0.713846	-1.26229	3.62019	SREBF1;LIPC;SCP2;PDSS1;AGPAT3
transport of virus (GO:0046794)	4/55	0.0709829	0.713846	-1.3683	3.61958	NUP214;NUP210;MVB12B;KPNB1
regulation of interferon-gamma-mediated signaling pathway (GO:0060334)	2/23	0.138284	0.713846	-1.82841	3.61741	HSP90AB1;SUMO1
negative regulation of cell cycle arrest (GO:0071157)	2/22	0.12857	0.713846	-1.76343	3.6173	HSP90AB1;CCND1
purine nucleotide metabolic process (GO:0006163)	2/21	0.119027	0.713846	-1.69877	3.61568	NT5C2;FHIT
regulation of ERBB signaling pathway (GO:1901184)	2/23	0.138284	0.713846	-1.82655	3.61373	MVB12B;EGFR
negative regulation of type 2 immune response (GO:0002829)	1/8	0.206214	0.713846	-2.28853	3.61322	ANXA1
negative regulation of appetite (GO:0032099)	1/9	0.228806	0.713846	-2.44301	3.60315	BBS4
peroxisomal transport (GO:0043574)	1/9	0.228806	0.713846	-2.42693	3.57943	LONP2
activation of phospholipase C activity (GO:0007202)	2/23	0.138284	0.713846	-1.80701	3.57508	GNAQ;EGFR
regulation of T-helper 1 cell differentiation (GO:0045625)	1/8	0.206214	0.713846	-2.26193	3.57123	ANXA1
epithelial cell migration (GO:0010631)	3/37	0.0873859	0.713846	-1.46427	3.56905	DPP4;PKN2;RHOA
intracellular estrogen receptor signaling pathway (GO:0030520)	2/20	0.109672	0.713846	-1.61315	3.56547	ARID1A;ESR1
diol biosynthetic process (GO:0034312)	1/9	0.228806	0.713846	-2.41711	3.56495	SPHK1
homotypic cell-cell adhesion (GO:0034109)	3/39	0.09869	0.713846	-1.53852	3.56286	UBASH3B;MEGF11;FLNA
leucine metabolic process (GO:0006551)	1/8	0.206214	0.713846	-2.25032	3.5529	BCAT1
protein deglutamylation (GO:0035608)	1/8	0.206214	0.713846	-2.23789	3.53327	AGBL4
cellular biogenic amine catabolic process (GO:0042402)	1/9	0.228806	0.713846	-2.39398	3.53083	CHDH
regulation of cell size (GO:0008361)	2/24	0.148151	0.713846	-1.8488	3.53033	RPTOR;RHOA
cellular response to oxidative stress (GO:0034599)	6/116	0.113576	0.713846	-1.62241	3.5292	PYROXD1;GSR;LONP1;HTRA2;VRK2;EGFR
protein targeting to lysosome (GO:0006622)	2/20	0.109672	0.713846	-1.59669	3.52909	AP3M1;GNPTAB
positive regulation of cyclin-dependent protein serine/threonine kinase activity involved in G1/S transition of mitotic cell cycle (GO:0031659)	1/8	0.206214	0.713846	-2.22997	3.52076	EGFR
axonal transport (GO:0098930)	3/37	0.0873859	0.713846	-1.44046	3.511	AP3M1;KIF1B;TRAK1
regulation of peptidyl-threonine phosphorylation (GO:0010799)	3/38	0.0929664	0.713846	-1.47591	3.50606	RPTOR;SPHK1;PRKAG2
modulation by symbiont of host cellular process (GO:0044068)	1/8	0.206214	0.713846	-2.21991	3.50488	KPNB1
negative regulation of programmed cell death (GO:0043069)	18/409	0.0457924	0.686594	-1.13508	3.50018	ANXA1;SEMA4D;FLT3;PRKDC;SPHK1;ATAD3A;EGFR;FAM129B;SOCS2;AHI1;GCLC;SON;RASA1;FLNA;BID;IL6ST;CD44;FGFR2
regulation of actin cytoskeleton organization (GO:0032956)	5/76	0.0653202	0.713846	-1.28237	3.49889	BST1;RHOBTB3;NEB;ARHGAP17;RHOA
positive regulation of embryonic development (GO:0040019)	2/26	0.16828	0.713846	-1.96226	3.497	TENM4;FAM129B
regulation of RNA splicing (GO:0043484)	4/56	0.0748077	0.713846	-1.34548	3.48859	MBNL1;SON;RBM20;CLK3
glucocorticoid receptor signaling pathway (GO:0042921)	1/7	0.182961	0.713846	-2.05317	3.48727	ARID1A
central nervous system myelination (GO:0022010)	1/9	0.228806	0.713846	-2.36252	3.48443	TENM4
glucose transport (GO:0015758)	2/23	0.138284	0.713846	-1.76008	3.48223	SLC2A9;SLC5A10
negative regulation of cardiocyte differentiation (GO:1905208)	1/8	0.206214	0.713846	-2.19821	3.47062	EGFR
hemopoiesis (GO:0030097)	5/77	0.0683049	0.713846	-1.29225	3.46812	KIRREL3;FLT3;FGFR2;RUNX2;TGFBR2
snRNA transcription (GO:0009301)	5/71	0.0515217	0.700948	-1.16922	3.46762	POU2F1;INTS2;PHAX;POLR2I;RPAP2
positive regulation of icosanoid secretion (GO:0032305)	1/7	0.182961	0.713846	-2.04032	3.46544	P2RX4
regulation of lipid transport (GO:0032368)	1/9	0.228806	0.713846	-2.34903	3.46454	NCOR1
regulation of skeletal muscle fiber development (GO:0048742)	1/8	0.206214	0.713846	-2.18933	3.45661	FAM129B
positive regulation of mast cell degranulation (GO:0043306)	1/8	0.206214	0.713846	-2.1884	3.45514	VAMP8
regulation of sarcomere organization (GO:0060297)	1/7	0.182961	0.713846	-2.03289	3.45282	AKAP13
negative regulation of voltage-gated potassium channel activity (GO:1903817)	1/9	0.228806	0.713846	-2.33672	3.44639	SUMO1
exonucleolytic trimming to generate mature 3'-end of 5.8S rRNA from tricistronic rRNA transcript (SSU-rRNA, 5.8S rRNA, LSU-rRNA) (GO:0000467)	1/8	0.206214	0.713846	-2.17652	3.43638	EXOSC8
regulation of superoxide metabolic process (GO:0090322)	1/7	0.182961	0.713846	-2.02313	3.43625	BST1
angiogenesis involved in wound healing (GO:0060055)	1/9	0.228806	0.713846	-2.32212	3.42485	HPSE
snRNA transcription from RNA polymerase II promoter (GO:0042795)	5/71	0.0515217	0.700948	-1.1547	3.42456	POU2F1;INTS2;PHAX;POLR2I;RPAP2
response to leucine (GO:0043201)	1/10	0.250757	0.713846	-2.46927	3.41568	RPTOR
regulation of dendrite development (GO:0050773)	3/38	0.0929664	0.713846	-1.43715	3.41397	SEMA4D;HECW2;DAB2IP
valine metabolic process (GO:0006573)	1/8	0.206214	0.713846	-2.16075	3.41149	BCAT1
indolalkylamine metabolic process (GO:0006586)	1/7	0.182961	0.713846	-2.00572	3.40668	DDC
positive regulation of ATP metabolic process (GO:1903580)	2/24	0.148151	0.713846	-1.78096	3.4008	PID1;PFKFB3
STAT cascade (GO:0097696)	2/23	0.138284	0.713846	-1.71794	3.39885	SOCS2;SOCS6
sulfur amino acid metabolic process (GO:0000096)	2/23	0.138284	0.713846	-1.71416	3.39138	NFS1;GCLC
regulation of stress-activated MAPK cascade (GO:0032872)	3/42	0.116671	0.713846	-1.5783	3.39082	ULK4;DAB2IP;EGFR
negative regulation of glucose import (GO:0046325)	1/9	0.228806	0.713846	-2.29108	3.37907	PID1
heparan sulfate proteoglycan biosynthetic process, polysaccharide chain biosynthetic process (GO:0015014)	1/7	0.182961	0.713846	-1.98802	3.37662	HS2ST1
sphingosine biosynthetic process (GO:0046512)	1/9	0.228806	0.713846	-2.28857	3.37537	SPHK1
membrane raft distribution (GO:0031580)	1/8	0.206214	0.713846	-2.13523	3.37119	PLLP
negative regulation of protein import into nucleus (GO:0042308)	2/23	0.138284	0.713846	-1.70037	3.3641	MDFIC;DAB2IP
negative regulation of bone remodeling (GO:0046851)	1/9	0.228806	0.713846	-2.27569	3.35637	UBASH3B
protein polyglutamylation (GO:0018095)	1/10	0.250757	0.713846	-2.42491	3.35431	TTLL5
membrane raft polarization (GO:0001766)	1/8	0.206214	0.713846	-2.12327	3.3523	PLLP
translesion synthesis (GO:0019985)	3/43	0.122919	0.713846	-1.59811	3.35	POLI;RPA2;RCHY1
regulation of smoothened signaling pathway (GO:0008589)	3/37	0.0873859	0.713846	-1.37011	3.33953	FUZ;BTRC;FGFR2
regulation of striated muscle cell differentiation (GO:0051153)	1/9	0.228806	0.713846	-2.26373	3.33874	AKAP13
regulation of primary metabolic process (GO:0080090)	8/140	0.046972	0.698084	-1.0905	3.33498	TIAM2;CPT1A;PSMD6;NCOR1;ABCB4;PSAP;RGL1;BBS4
positive regulation of RNA splicing (GO:0033120)	2/23	0.138284	0.713846	-1.68267	3.32907	CELF4;RBM20
prepulse inhibition (GO:0060134)	1/7	0.182961	0.713846	-1.95851	3.32649	CTNNA2
peripheral nervous system axon ensheathment (GO:0032292)	1/9	0.228806	0.713846	-2.25282	3.32263	ADGRG6
positive regulation of interleukin-2 biosynthetic process (GO:0045086)	1/9	0.228806	0.713846	-2.25033	3.31896	CD86
negative regulation of glial cell differentiation (GO:0045686)	1/9	0.228806	0.713846	-2.2497	3.31803	DAAM2
positive regulation of myelination (GO:0031643)	1/7	0.182961	0.713846	-1.95002	3.31207	TENM4
coenzyme A biosynthetic process (GO:0015937)	1/8	0.206214	0.713846	-2.09708	3.31095	ACOT7
positive regulation of protein localization to cell surface (GO:2000010)	1/9	0.228806	0.713846	-2.24409	3.30976	HSP90AB1
regulation of cellular catabolic process (GO:0031329)	4/56	0.0748077	0.713846	-1.27586	3.30808	RPTOR;PSAP;LONP2;FBXL2
purine-containing compound biosynthetic process (GO:0072522)	2/23	0.138284	0.713846	-1.6711	3.30618	GMPR2;AMPD3
myelin assembly (GO:0032288)	1/10	0.250757	0.713846	-2.38886	3.30445	TENM4
branched-chain amino acid catabolic process (GO:0009083)	2/22	0.12857	0.713846	-1.6096	3.30175	BCKDHB;BCAT1
regulation of ERAD pathway (GO:1904292)	1/9	0.228806	0.713846	-2.22887	3.28732	BRSK2
digestive system development (GO:0055123)	2/23	0.138284	0.713846	-1.65686	3.27801	CLMP;FGFR2
nuclear polyadenylation-dependent ncRNA catabolic process (GO:0071046)	1/7	0.182961	0.713846	-1.92584	3.27101	EXOSC8
negative regulation of exocytosis (GO:0045920)	1/9	0.228806	0.713846	-2.21766	3.27078	ANXA1
B cell mediated immunity (GO:0019724)	1/9	0.228806	0.713846	-2.21395	3.26531	SLA2
negative regulation of synapse organization (GO:1905809)	1/8	0.206214	0.713846	-2.06634	3.26242	SLIT1
exonucleolytic trimming involved in rRNA processing (GO:0000459)	1/8	0.206214	0.713846	-2.06534	3.26085	EXOSC8
GPI anchor metabolic process (GO:0006505)	2/27	0.178511	0.713846	-1.88527	3.24852	PIGL;MPPE1
regulation of store-operated calcium entry (GO:2001256)	1/9	0.228806	0.713846	-2.19979	3.24443	HOMER2
hyperosmotic response (GO:0006972)	1/8	0.206214	0.713846	-2.04998	3.2366	RCSD1
virion attachment to host cell (GO:0019062)	1/10	0.250757	0.713846	-2.33937	3.23599	HSP90AB1
alpha-amino acid biosynthetic process (GO:1901607)	1/9	0.228806	0.713846	-2.18908	3.22863	BCAT1
activation of MAPKKK activity (GO:0000185)	1/8	0.206214	0.713846	-2.04484	3.22848	DAB2IP
positive regulation of production of miRNAs involved in gene silencing by miRNA (GO:1903800)	1/9	0.228806	0.713846	-2.18118	3.21698	EGFR
peroxisome fission (GO:0016559)	1/10	0.250757	0.713846	-2.3255	3.2168	PEX11G
positive regulation of Ras protein signal transduction (GO:0046579)	3/41	0.110547	0.713846	-1.45461	3.20351	AKAP13;RASGRF1;RASGRP1
regulation of cytoplasmic mRNA processing body assembly (GO:0010603)	1/9	0.228806	0.713846	-2.16994	3.20041	CNOT2
exocrine system development (GO:0035272)	1/9	0.228806	0.713846	-2.16541	3.19372	FGFR2
regulation of cell motility (GO:2000145)	6/110	0.0939988	0.713846	-1.34928	3.19034	KIF2A;SPATA13;FLNA;PKN2;RHOA;EGFR
NLS-bearing protein import into nucleus (GO:0006607)	2/23	0.138284	0.713846	-1.61039	3.18607	RERE;KPNB1
regulation of protein heterodimerization activity (GO:0043497)	1/8	0.206214	0.713846	-2.01629	3.18341	DAB2IP
peroxisome organization (GO:0007031)	2/24	0.148151	0.713846	-1.66395	3.17735	LONP2;PEX11G
inositol lipid-mediated signaling (GO:0048017)	3/40	0.104552	0.713846	-1.40507	3.17275	PI4KA;PI4KB;RHOA
intrinsic apoptotic signaling pathway in response to endoplasmic reticulum stress (GO:0070059)	2/25	0.158155	0.713846	-1.71668	3.16587	BRSK2;DAB2IP
negative regulation of sequence-specific DNA binding transcription factor activity (GO:0043433)	7/141	0.108106	0.713846	-1.41442	3.14659	SUMO1;GFI1;DAB2IP;FLNA;RBCK1;BTRC;ESR1
determination of liver left/right asymmetry (GO:0071910)	1/7	0.182961	0.713846	-1.84855	3.13972	DNAAF1
regulation of ER to Golgi vesicle-mediated transport (GO:0060628)	1/8	0.206214	0.713846	-1.98391	3.13228	TBC1D20
negative regulation of alcohol biosynthetic process (GO:1902931)	1/10	0.250757	0.713846	-2.26179	3.12867	GFI1
ceramide metabolic process (GO:0006672)	3/43	0.122919	0.713846	-1.49247	3.12855	CERK;SGMS1;CERS2
positive regulation of lipid transport (GO:0032370)	1/8	0.206214	0.713846	-1.98154	3.12854	ABCB4
negative regulation of cell adhesion (GO:0007162)	4/66	0.118428	0.713846	-1.46207	3.11927	SEMA4D;RASA1;MIA3;RHOA
nuclear envelope disassembly (GO:0051081)	3/47	0.149051	0.713846	-1.63704	3.11605	NUP214;NUP210;PRKCB
Golgi vesicle transport (GO:0048193)	12/272	0.0894602	0.713846	-1.28953	3.11288	VAMP8;NBAS;TBC1D20;CUX1;KIF2A;VTI1A;MIA3;MPPE1;SEC24D;SNX8;ERGIC2;ARCN1
branched-chain amino acid metabolic process (GO:0009081)	2/23	0.138284	0.713846	-1.57018	3.10653	BCKDHB;BCAT1
regulation of establishment of protein localization to mitochondrion (GO:1903747)	1/9	0.228806	0.713846	-2.09738	3.09339	SREBF1
cellular response to oxygen-containing compound (GO:1901701)	13/275	0.0518118	0.700948	-1.04371	3.08954	CD86;PID1;GFI1;ABCB4;DAB2IP;HTRA2;ESR1;RHOA;EGFR;RPTOR;P2RX4;NRIP1;PDE4B
ribosomal protein import into nucleus (GO:0006610)	1/8	0.206214	0.713846	-1.95619	3.08851	KPNB1
regulation of cell cycle arrest (GO:0071156)	3/49	0.162732	0.713846	-1.6933	3.07445	HSP90AB1;CCND1;DAB2IP
cellular macromolecule catabolic process (GO:0044265)	3/49	0.162732	0.713846	-1.68923	3.06704	XRN2;DAB2IP;HTRA2
dendritic cell differentiation (GO:0097028)	2/22	0.12857	0.713846	-1.4941	3.06483	FLT3;TGFBR2
positive regulation of programmed cell death (GO:0043068)	12/258	0.0661092	0.713846	-1.12748	3.06274	FGD3;TIAM2;AKAP13;DAB2IP;ARHGEF3;ARHGEF4;HTRA2;STK4;BID;FGD1;ARHGEF6;STK3
regulation of ATP biosynthetic process (GO:2001169)	1/9	0.228806	0.713846	-2.07546	3.06105	PID1
nuclear-transcribed mRNA catabolic process (GO:0000956)	9/175	0.063067	0.713846	-1.10662	3.05821	ZCCHC11;NBAS;RPL3;RPS18;CNOT2;EXOSC8;RPL13A;RPS11;RPL18
postsynaptic density organization (GO:0097106)	1/10	0.250757	0.713846	-2.20989	3.05688	SHANK2
regulation of protein import into nucleus (GO:0042306)	2/26	0.16828	0.713846	-1.71434	3.05517	MDFIC;GNAQ
sphingoid biosynthetic process (GO:0046520)	1/10	0.250757	0.713846	-2.2049	3.04998	SPHK1
actin filament organization (GO:0007015)	7/121	0.0576522	0.713846	-1.06791	3.0471	SAMD14;BAIAP2L1;RHOBTB3;FLNA;ARHGAP17;FRYL;RHOA
NAD metabolic process (GO:0019674)	2/24	0.148151	0.713846	-1.59377	3.04335	BST1;KMO
cAMP metabolic process (GO:0046058)	2/25	0.158155	0.713846	-1.64672	3.03684	PDE4D;PDE4B
microtubule nucleation by microtubule organizing center (GO:0051418)	1/9	0.228806	0.713846	-2.05666	3.03333	TUBGCP4
positive regulation of reactive oxygen species metabolic process (GO:2000379)	3/40	0.104552	0.713846	-1.3404	3.02671	PID1;RAB27A;TGFBR2
negative regulation of platelet aggregation (GO:0090331)	1/9	0.228806	0.713846	-2.04926	3.02241	PRKG1
regulation of monooxygenase activity (GO:0032768)	2/24	0.148151	0.713846	-1.58174	3.02038	NOSTRIN;EGFR
positive regulation of interferon-gamma production (GO:0032729)	3/44	0.129286	0.713846	-1.47634	3.02019	PDE4D;PDE4B;RASGRP1
I-kappaB phosphorylation (GO:0007252)	1/11	0.272083	0.713846	-2.31911	3.01867	DAB2IP
isoprenoid biosynthetic process (GO:0008299)	1/9	0.228806	0.713846	-2.04303	3.01323	PDSS1
negative regulation of cell cycle process (GO:0010948)	5/82	0.0843364	0.713846	-1.2172	3.01006	TOM1L2;HSP90AB1;CCND1;DMRT1;DAB2IP
positive regulation of protein modification process (GO:0031401)	9/164	0.0452314	0.68375	-0.971304	3.00712	CCND3;SEMA4D;CCND1;FAM129A;PPP2R5A;STK4;RASGRP1;ACVR2A;EGFR
long-chain fatty acid biosynthetic process (GO:0042759)	1/10	0.250757	0.713846	-2.16792	2.99883	ACOT7
positive regulation of vascular endothelial growth factor production (GO:0010575)	2/25	0.158155	0.713846	-1.62567	2.99802	HPSE;IL6ST
regulation of carbohydrate catabolic process (GO:0043470)	3/38	0.0929664	0.713846	-1.25867	2.98998	NUP214;NUP210;PRKAG2
lipid transport (GO:0006869)	5/92	0.121714	0.713846	-1.41425	2.97854	SCP2;SLC10A1;SLCO2B1;PSAP;ABCA13
early endosome to Golgi transport (GO:0034498)	1/9	0.228806	0.713846	-2.01306	2.96902	SNX8
positive regulation of cell activation (GO:0050867)	1/10	0.250757	0.713846	-2.14568	2.96805	SELP
respiratory chain complex III assembly (GO:0017062)	1/10	0.250757	0.713846	-2.14454	2.96648	TTC19
regulation of sequestering of calcium ion (GO:0051282)	1/10	0.250757	0.713846	-2.14207	2.96307	UBASH3B
negative regulation of centrosome duplication (GO:0010826)	1/11	0.272083	0.713846	-2.27534	2.96169	TMEM67
regulation of epithelial cell proliferation (GO:0050678)	4/73	0.154152	0.713846	-1.58205	2.95813	DAB2IP;FGFR2;EGFR;MTSS1
cellular response to epinephrine stimulus (GO:0071872)	1/9	0.228806	0.713846	-2.00423	2.956	PDE4B
nuclear-transcribed mRNA catabolic process, exonucleolytic, 3'-5' (GO:0034427)	1/10	0.250757	0.713846	-2.13362	2.95138	EXOSC8
nucleocytoplasmic transport (GO:0006913)	3/47	0.149051	0.713846	-1.55014	2.95064	GEMIN5;PHAX;BACH2
regulation of cellular response to heat (GO:1900034)	5/79	0.074497	0.713846	-1.13553	2.94897	NUP214;RPTOR;HSP90AB1;NUP210;RPA2
excitatory synapse assembly (GO:1904861)	1/9	0.228806	0.713846	-1.99872	2.94787	SHANK2
epithelial cilium movement involved in determination of left/right asymmetry (GO:0060287)	1/10	0.250757	0.713846	-2.12812	2.94377	DNAAF1
negative regulation of protein catabolic process (GO:0042177)	3/40	0.104552	0.713846	-1.30293	2.94211	DAB2IP;FLNA;EGFR
progesterone receptor signaling pathway (GO:0050847)	1/8	0.206214	0.713846	-1.86127	2.93864	UBR5
negative regulation of Ras protein signal transduction (GO:0046580)	3/38	0.0929664	0.713846	-1.23474	2.93314	SYNGAP1;RASA1;DAB2IP
maturation of LSU-rRNA from tricistronic rRNA transcript (SSU-rRNA, 5.8S rRNA, LSU-rRNA) (GO:0000463)	1/10	0.250757	0.713846	-2.11476	2.92529	BOP1
positive regulation of nitric oxide biosynthetic process (GO:0045429)	2/26	0.16828	0.713846	-1.64104	2.92455	P2RX4;HSP90AB1
microtubule cytoskeleton organization involved in mitosis (GO:1902850)	3/45	0.135767	0.713846	-1.456	2.90736	KIF2A;MAP4;KPNB1
positive regulation of intracellular signal transduction (GO:1902533)	19/480	0.0934702	0.713846	-1.22391	2.90079	CD86;SEMA4D;PRKCB;FLT3;DAB2IP;ESR1;RHOA;EGFR;SELP;RPTOR;AKAP13;P2RX5;P2RX4;FLNA;RBCK1;HPSE;BID;IKBKE;FGFR2
negative regulation of phosphatidylinositol 3-kinase signaling (GO:0014067)	1/10	0.250757	0.713846	-2.09577	2.89902	DAB2IP
regulation of cell projection organization (GO:0031344)	1/8	0.206214	0.713846	-1.83273	2.89359	SEMA4D
positive regulation of hemostasis (GO:1900048)	1/10	0.250757	0.713846	-2.09167	2.89334	HPSE
cytoskeleton organization (GO:0007010)	7/127	0.0708631	0.713846	-1.0925	2.89186	FGD3;ZMYM1;FGD5;SH3KBP1;RHOBTB3;WDPCP;FGD1
ribonucleoside bisphosphate biosynthetic process (GO:0034030)	1/8	0.206214	0.713846	-1.83038	2.88988	ACOT7
ameboidal-type cell migration (GO:0001667)	3/41	0.110547	0.713846	-1.31212	2.8897	SEMA4D;PKN2;SRGAP2
cellular response to lipopolysaccharide (GO:0071222)	5/92	0.121714	0.713846	-1.37169	2.8889	CD86;GFI1;DAB2IP;PDE4B;RHOA
long-chain fatty acid transport (GO:0015909)	2/26	0.16828	0.713846	-1.62014	2.8873	CPT1A;PRKAG2
positive regulation of intracellular transport (GO:0032388)	3/45	0.135767	0.713846	-1.44158	2.87856	RIPOR1;TBC1D20;BID
cellular response to epidermal growth factor stimulus (GO:0071364)	2/26	0.16828	0.713846	-1.6146	2.87742	DAB2IP;EGFR
positive regulation of plasma membrane bounded cell projection assembly (GO:0120034)	4/70	0.138373	0.713846	-1.45466	2.87703	CDC42EP4;FUZ;TAPT1;BBS4
respiratory tube development (GO:0030323)	2/26	0.16828	0.713846	-1.613	2.87457	DNAAF1;FGFR2
negative regulation of adenylate cyclase activity (GO:0007194)	2/21	0.119027	0.713846	-1.34879	2.87077	GABBR2;GNAI2
carboxylic acid catabolic process (GO:0046395)	2/29	0.199235	0.713846	-1.77576	2.86477	HEXA;CD44
transcription from RNA polymerase II promoter (GO:0006366)	20/486	0.0643992	0.713846	-1.04169	2.85701	POU2F1;NFIX;THRB;INTS2;ESRRB;SSU72;PHAX;NR2C2;RPAP2;ESR1;BACH2;RUNX2;NR6A1;NCOR1;CCND1;DHX38;MAML3;HIVEP2;SRSF5;POLR2I
negative regulation of monooxygenase activity (GO:0032769)	1/9	0.228806	0.713846	-1.93626	2.85575	GFI1
regulation of NF-kappaB import into nucleus (GO:0042345)	2/27	0.178511	0.713846	-1.65699	2.85517	SPHK1;RHOA
positive regulation of triglyceride biosynthetic process (GO:0010867)	1/10	0.250757	0.713846	-2.06195	2.85224	SREBF1
positive regulation of nitric oxide metabolic process (GO:1904407)	2/26	0.16828	0.713846	-1.59859	2.84889	P2RX4;HSP90AB1
regulation of ATP metabolic process (GO:1903578)	3/44	0.129286	0.713846	-1.39137	2.84636	NUP214;NUP210;PRKAG2
Cdc42 protein signal transduction (GO:0032488)	1/10	0.250757	0.713846	-2.05696	2.84534	RHOBTB3
regulation of JNK cascade (GO:0046328)	5/91	0.117673	0.713846	-1.32892	2.84369	NCOR1;ULK4;DAB2IP;RASGRP1;EGFR
digestive tract development (GO:0048565)	3/44	0.129286	0.713846	-1.38802	2.83952	CLMP;DNAAF1;FGFR2
ATP biosynthetic process (GO:0006754)	2/33	0.241379	0.713846	-1.99308	2.83294	ATP5B;PRKAG2
negative regulation of embryonic development (GO:0045992)	1/11	0.272083	0.713846	-2.17361	2.82927	FUZ
snRNA 3'-end processing (GO:0034472)	2/27	0.178511	0.713846	-1.63907	2.8243	EXOSC8;INTS2
cellular response to vascular endothelial growth factor stimulus (GO:0035924)	2/26	0.16828	0.713846	-1.58456	2.82389	ANXA1;DAB2IP
calcium-dependent cell-cell adhesion via plasma membrane cell adhesion molecules (GO:0016339)	3/42	0.116671	0.713846	-1.31081	2.81613	SELP;CDH23;CDH8
positive regulation of neurological system process (GO:0031646)	1/8	0.206214	0.713846	-1.78264	2.8145	TENM4
positive regulation of cyclin-dependent protein kinase activity (GO:1904031)	2/27	0.178511	0.713846	-1.62822	2.80559	CCND3;CCND1
chylomicron remnant clearance (GO:0034382)	1/8	0.206214	0.713846	-1.77323	2.79966	LIPC
regulation of cardiac muscle cell contraction (GO:0086004)	2/27	0.178511	0.713846	-1.62378	2.79794	PDE4D;PDE4B
in utero embryonic development (GO:0001701)	2/26	0.16828	0.713846	-1.56689	2.7924	MBNL1;FGFR2
embryonic digestive tract morphogenesis (GO:0048557)	1/10	0.250757	0.713846	-2.01836	2.79194	FGFR2
cellular amino acid catabolic process (GO:0009063)	2/24	0.148151	0.713846	-1.46164	2.79105	BCKDHB;BCAT1
positive regulation of blood vessel endothelial cell migration (GO:0043536)	3/46	0.142357	0.713846	-1.43066	2.78895	ATP5B;P2RX4;ANXA1
tRNA methylation (GO:0030488)	2/27	0.178511	0.713846	-1.60727	2.76949	NSUN2;TRMT13
regulation of canonical Wnt signaling pathway (GO:0060828)	10/214	0.0859926	0.713846	-1.12794	2.76739	PSMD6;DAAM2;UBR5;DAB2IP;FUZ;STK4;BTRC;FGFR2;RNF220;STK3
negative regulation of delayed rectifier potassium channel activity (GO:1902260)	1/7	0.182961	0.713846	-1.62883	2.76654	SUMO1
enzyme linked receptor protein signaling pathway (GO:0007167)	6/121	0.131337	0.713846	-1.36248	2.76583	AHI1;FLT3;SLA2;IL6ST;ACVR2A;MTSS1
atrioventricular valve development (GO:0003171)	1/10	0.250757	0.713846	-1.99254	2.75623	TGFBR2
negative regulation of interleukin-8 secretion (GO:2000483)	1/8	0.206214	0.713846	-1.74561	2.75604	ANXA1
regulation of organ morphogenesis (GO:2000027)	1/10	0.250757	0.713846	-1.99196	2.75542	FGFR2
nicotinamide nucleotide metabolic process (GO:0046496)	3/46	0.142357	0.713846	-1.41151	2.75163	BST1;KMO;HK1
mitotic nuclear envelope disassembly (GO:0007077)	3/45	0.135767	0.713846	-1.37423	2.74408	NUP214;NUP210;PRKCB
isoprenoid metabolic process (GO:0006720)	1/9	0.228806	0.713846	-1.85897	2.74176	PDSS1
negative regulation of stem cell differentiation (GO:2000737)	1/11	0.272083	0.713846	-2.10442	2.73922	ESRRB
glycolipid metabolic process (GO:0006664)	4/66	0.118428	0.713846	-1.28044	2.73177	CERK;PSAP;HEXA;ST3GAL6
negative regulation of lymphocyte apoptotic process (GO:0070229)	1/10	0.250757	0.713846	-1.97458	2.73139	FOXP1
microtubule anchoring at centrosome (GO:0034454)	1/10	0.250757	0.713846	-1.97336	2.72969	BBS4
double-strand break repair via nonhomologous end joining (GO:0006303)	3/51	0.176771	0.713846	-1.57492	2.72918	SUMO1;PRKDC;NSD2
pinocytosis (GO:0006907)	1/10	0.250757	0.713846	-1.96774	2.72192	DOCK2
negative regulation of peptidyl-tyrosine phosphorylation (GO:0050732)	2/28	0.188834	0.713846	-1.63265	2.72144	SEMA4D;SH3BP5
regulation of protein complex assembly (GO:0043254)	4/74	0.159556	0.713846	-1.47971	2.71579	SELP;SUMO1;DAB2IP;SPIDR
cellular response to growth factor stimulus (GO:0071363)	7/140	0.105152	0.713846	-1.20519	2.7145	ANXA1;DAB2IP;HTRA2;CD44;ACVR2A;EGFR;RUNX2
indolalkylamine catabolic process (GO:0046218)	1/10	0.250757	0.713846	-1.95762	2.70793	KMO
cellular response to molecule of bacterial origin (GO:0071219)	5/85	0.0948247	0.713846	-1.14756	2.70334	CD86;GFI1;DAB2IP;PDE4B;RHOA
very-low-density lipoprotein particle remodeling (GO:0034372)	1/10	0.250757	0.713846	-1.95346	2.70216	LIPC
negative regulation of cardiac muscle hypertrophy (GO:0010614)	1/12	0.292804	0.713846	-2.19774	2.69938	P2RX4
regulation of adenylate cyclase activity (GO:0045761)	2/29	0.199235	0.713846	-1.66944	2.69326	GABBR2;GNAI2
cellular modified amino acid biosynthetic process (GO:0042398)	2/25	0.158155	0.713846	-1.46029	2.69304	GCLC;GSS
cell-cell junction assembly (GO:0007043)	5/80	0.0777038	0.713846	-1.05385	2.69243	CTNNA1;PKN2;MPP5;CDH8;RHOA
extrinsic apoptotic signaling pathway via death domain receptors (GO:0008625)	2/28	0.188834	0.713846	-1.61284	2.68842	DAB2IP;BID
negative regulation of T-helper cell differentiation (GO:0045623)	1/9	0.228806	0.713846	-1.82266	2.6882	ANXA1
adipose tissue development (GO:0060612)	1/10	0.250757	0.713846	-1.93903	2.68221	ARID5B
regulation of apoptotic signaling pathway (GO:2001233)	2/26	0.16828	0.713846	-1.50438	2.68099	SGMS1;DAB2IP
negative regulation of cellular protein catabolic process (GO:1903363)	1/11	0.272083	0.713846	-2.05922	2.68038	DAB2IP
non-recombinational repair (GO:0000726)	3/50	0.169709	0.713846	-1.50989	2.67805	SUMO1;PRKDC;NSD2
stress-activated protein kinase signaling cascade (GO:0031098)	4/71	0.143558	0.713846	-1.37398	2.66692	MAP3K1;STK4;BTRC;STK3
cellular response to growth hormone stimulus (GO:0071378)	1/11	0.272083	0.713846	-2.04723	2.66477	SOCS2
regulation of phospholipase activity (GO:0010517)	1/11	0.272083	0.713846	-2.04317	2.65948	FGFR2
mitochondrial respiratory chain complex III assembly (GO:0034551)	1/10	0.250757	0.713846	-1.92123	2.65758	TTC19
establishment of Golgi localization (GO:0051683)	1/9	0.228806	0.713846	-1.78861	2.63799	RIPOR1
regulation of vascular associated smooth muscle cell migration (GO:1904752)	1/9	0.228806	0.713846	-1.78665	2.63509	PRKG1
positive regulation of gastrulation (GO:2000543)	1/8	0.206214	0.713846	-1.66768	2.633	TENM4
neuron projection extension involved in neuron projection guidance (GO:1902284)	1/9	0.228806	0.713846	-1.77882	2.62355	SLIT1
response to epinephrine (GO:0071871)	1/9	0.228806	0.713846	-1.77173	2.61309	PDE4B
negative regulation of proteasomal ubiquitin-dependent protein catabolic process (GO:0032435)	2/25	0.158155	0.713846	-1.41621	2.61176	HSP90AB1;FHIT
motor neuron axon guidance (GO:0008045)	1/11	0.272083	0.713846	-2.00632	2.61152	SLIT1
postsynaptic density assembly (GO:0097107)	1/8	0.206214	0.713846	-1.65201	2.60826	SHANK2
regulation of integrin activation (GO:0033623)	1/10	0.250757	0.713846	-1.88318	2.60495	SELP
cellular response to organic cyclic compound (GO:0071407)	7/136	0.0937844	0.713846	-1.09605	2.59409	P2RX4;ABCB4;NRIP1;CTNNA1;ESR1;SPIDR;EGFR
positive regulation of tissue remodeling (GO:0034105)	1/9	0.228806	0.713846	-1.75868	2.59384	TMBIM1
regulation of fatty acid beta-oxidation (GO:0031998)	1/11	0.272083	0.713846	-1.99247	2.59349	LONP2
cell part morphogenesis (GO:0032990)	1/12	0.292804	0.713846	-2.10869	2.59001	PID1
negative regulation of cellular protein metabolic process (GO:0032269)	5/90	0.113697	0.713846	-1.19092	2.58932	CNOT2;TM4SF20;DAB2IP;RPL13A;TYMS
thyroid gland development (GO:0030878)	1/11	0.272083	0.713846	-1.98618	2.5853	THRB
coenzyme A metabolic process (GO:0015936)	1/11	0.272083	0.713846	-1.98548	2.58439	ACOT7
negative regulation of intracellular estrogen receptor signaling pathway (GO:0033147)	1/11	0.272083	0.713846	-1.98197	2.57982	CNOT2
peptidyl-glutamic acid modification (GO:0018200)	2/28	0.188834	0.713846	-1.5453	2.57585	AGBL4;TTLL5
negative regulation of meiotic nuclear division (GO:0045835)	1/7	0.182961	0.713846	-1.51637	2.57553	DMRT1
actin filament reorganization (GO:0090527)	1/10	0.250757	0.713846	-1.85904	2.57155	FRYL
epithelial tube formation (GO:0072175)	1/7	0.182961	0.713846	-1.5123	2.56861	FGFR2
positive regulation of CD4-positive, alpha-beta T cell activation (GO:2000516)	1/8	0.206214	0.713846	-1.61973	2.5573	TGFBR2
collagen metabolic process (GO:0032963)	1/13	0.312936	0.713846	-2.20065	2.55662	TRAM2
positive regulation of alpha-beta T cell differentiation (GO:0046638)	1/9	0.228806	0.713846	-1.7313	2.55346	TGFBR2
positive regulation of RNA polymerase II transcriptional preinitiation complex assembly (GO:0045899)	1/9	0.228806	0.713846	-1.73095	2.55295	ESR1
positive regulation of interleukin-5 production (GO:0032754)	1/8	0.206214	0.713846	-1.61553	2.55066	PDE4D
Schwann cell development (GO:0014044)	1/9	0.228806	0.713846	-1.7291	2.55022	ADGRG6
acid secretion (GO:0046717)	1/9	0.228806	0.713846	-1.72712	2.5473	ABCB4
negative regulation of nucleocytoplasmic transport (GO:0046823)	1/12	0.292804	0.713846	-2.07334	2.54658	MDFIC
regulation of dendrite morphogenesis (GO:0048814)	3/45	0.135767	0.713846	-1.27267	2.54128	SEMA4D;CUX1;HECW2
cellular response to ATP (GO:0071318)	1/11	0.272083	0.713846	-1.95229	2.54119	P2RX4
regulation of cytokinesis (GO:0032465)	4/78	0.181838	0.713846	-1.489	2.53821	PKN2;KIF20A;BBS4;RHOA
regulation of DNA damage checkpoint (GO:2000001)	1/11	0.272083	0.713846	-1.93747	2.5219	RPA2
mitochondrion morphogenesis (GO:0070584)	1/10	0.250757	0.713846	-1.82143	2.51954	PID1
regulation of extrinsic apoptotic signaling pathway in absence of ligand (GO:2001239)	2/28	0.188834	0.713846	-1.50873	2.51489	PPP2R1B;HTRA2
low-density lipoprotein particle receptor catabolic process (GO:0032802)	1/11	0.272083	0.713846	-1.92853	2.51026	AP2A2
positive regulation of circadian rhythm (GO:0042753)	1/11	0.272083	0.713846	-1.92484	2.50546	BTRC
regulation of p38MAPK cascade (GO:1900744)	2/27	0.178511	0.713846	-1.44754	2.49426	ULK4;DAB2IP
axon extension involved in axon guidance (GO:0048846)	1/9	0.228806	0.713846	-1.69101	2.49404	SLIT1
negative regulation of retrograde protein transport, ER to cytosol (GO:1904153)	1/9	0.228806	0.713846	-1.69001	2.49256	OS9
regulation of actin filament-based process (GO:0032970)	4/63	0.10436	0.713846	-1.10221	2.49089	BST1;RHOBTB3;ARHGAP17;RHOA
positive regulation of endoplasmic reticulum unfolded protein response (GO:1900103)	1/13	0.312936	0.713846	-2.13871	2.48467	DAB2IP
mitochondrial ATP synthesis coupled proton transport (GO:0042776)	1/22	0.470231	0.736476	-3.29087	2.48306	ATP5B
cellular protein catabolic process (GO:0044257)	4/63	0.10436	0.713846	-1.09741	2.48004	DAB2IP;LONP1;HTRA2;AP2A2
calcium ion regulated exocytosis (GO:0017156)	1/12	0.292804	0.713846	-2.01745	2.47794	ARHGAP17
RNA processing (GO:0006396)	9/194	0.103176	0.713846	-1.09057	2.47704	RBM3;MBNL1;ZCCHC11;SON;HNRNPUL1;SCAF11;XRN2;DHX38;SRSF5
leukocyte cell-cell adhesion (GO:0007159)	2/28	0.188834	0.713846	-1.4853	2.47583	SELP;SEMA4D
protein localization to mitochondrion (GO:0070585)	1/11	0.272083	0.713846	-1.89833	2.47095	HK1
mitochondrial respiratory chain complex III biogenesis (GO:0097033)	1/11	0.272083	0.713846	-1.88643	2.45546	TTC19
vesicle-mediated transport (GO:0016192)	16/411	0.128724	0.713846	-1.19583	2.45155	ARFGEF1;APLP2;RHOBTB3;RAB27A;MIA3;VRK2;TRAK1;VAMP8;AHI1;CUX1;VTI1A;KIF1B;KIF20A;TBC1D17;SNX8;SNAP29
progesterone metabolic process (GO:0042448)	1/12	0.292804	0.713846	-1.99459	2.44986	DHRS9
regulation of vascular endothelial growth factor production (GO:0010574)	2/28	0.188834	0.713846	-1.46608	2.44379	HPSE;IL6ST
negative regulation of DNA repair (GO:0045738)	1/7	0.182961	0.713846	-1.43426	2.43606	UBR5
sphingomyelin metabolic process (GO:0006684)	1/10	0.250757	0.713846	-1.75427	2.42664	SGMS1
negative regulation of sodium ion transmembrane transporter activity (GO:2000650)	1/11	0.272083	0.713846	-1.86334	2.42541	HECW2
postreplication repair (GO:0006301)	3/48	0.155845	0.713846	-1.29711	2.4112	NSMCE1;POLI;RPA2
regulation of generation of precursor metabolites and energy (GO:0043467)	3/47	0.149051	0.713846	-1.26672	2.41115	NUP214;NUP210;PRKAG2
polarized epithelial cell differentiation (GO:0030859)	1/11	0.272083	0.713846	-1.83997	2.39499	RHOA
tube closure (GO:0060606)	2/30	0.209702	0.713846	-1.53184	2.39284	FUZ;BBS4
manganese ion transport (GO:0006828)	1/10	0.250757	0.713846	-1.72729	2.38931	TRPC5
cellular response to interleukin-2 (GO:0071352)	1/12	0.292804	0.713846	-1.93684	2.37893	IL2RA
negative regulation of protein localization to nucleus (GO:1900181)	1/12	0.292804	0.713846	-1.93336	2.37465	MDFIC
regulation of autophagy of mitochondrion (GO:1903146)	2/28	0.188834	0.713846	-1.42383	2.37336	SREBF1;HTRA2
protein localization to chromosome (GO:0034502)	2/28	0.188834	0.713846	-1.42339	2.37263	RPA2;ESR1
negative regulation of catenin import into nucleus (GO:0035414)	1/10	0.250757	0.713846	-1.70513	2.35867	DAB2IP
protein targeting to vacuole (GO:0006623)	2/28	0.188834	0.713846	-1.41464	2.35805	AP3M1;VTI1A
autophagosome maturation (GO:0097352)	2/24	0.148151	0.713846	-1.23441	2.35714	VAMP8;SNAP29
carnitine metabolic process (GO:0009437)	1/12	0.292804	0.713846	-1.91792	2.35569	CPT1A
regulation of cysteine-type endopeptidase activity involved in apoptotic signaling pathway (GO:2001267)	1/10	0.250757	0.713846	-1.70253	2.35506	HTRA2
regulation of double-strand break repair via homologous recombination (GO:0010569)	2/28	0.188834	0.713846	-1.41181	2.35333	RPA2;SPIDR
positive regulation of synapse maturation (GO:0090129)	1/10	0.250757	0.713846	-1.69986	2.35138	DAB2IP
regulation of actin filament polymerization (GO:0030833)	4/69	0.133265	0.713846	-1.16211	2.34213	ARFGEF1;BAIAP2L1;CDC42EP4;RASA1
regulation of reactive oxygen species metabolic process (GO:2000377)	3/50	0.169709	0.713846	-1.31976	2.34083	BST1;PID1;TGFBR2
protein phosphorylation (GO:0006468)	19/471	0.0814144	0.713846	-0.933024	2.34022	BRSK2;MAP3K1;PRKCB;FLT3;PRKDC;DAB2IP;VRK2;STK4;CLK3;EGFR;TGFBR2;STK3;EEF2K;MKNK1;PKN2;IKBKE;FGFR2;MAPK4;MAP3K12
phosphatidylinositol biosynthetic process (GO:0006661)	5/99	0.151731	0.713846	-1.23626	2.33115	MTMR14;PI4KA;PI4KB;PIGL;MPPE1
negative regulation of toll-like receptor 4 signaling pathway (GO:0034144)	1/9	0.228806	0.713846	-1.57873	2.32843	DAB2IP
response to leptin (GO:0044321)	1/9	0.228806	0.713846	-1.57494	2.32284	CCND1
regulation of cellular component movement (GO:0051270)	3/47	0.149051	0.713846	-1.21888	2.32009	PKN2;RHOA;EGFR
negative regulation of intrinsic apoptotic signaling pathway in response to DNA damage by p53 class mediator (GO:1902166)	1/12	0.292804	0.713846	-1.88476	2.31496	CD44
cilium assembly (GO:0060271)	12/289	0.123882	0.713846	-1.1073	2.31251	AHI1;C2CD3;TMEM67;DNAAF1;FLNA;POC1B;TRIM59;FUZ;WDPCP;SNAP29;BBS4;SDCCAG8
positive regulation of protein homooligomerization (GO:0032464)	1/10	0.250757	0.713846	-1.67156	2.31222	BID
nucleotide metabolic process (GO:0009117)	1/14	0.332495	0.713846	-2.09861	2.31085	FHIT
positive regulation of ion transport (GO:0043270)	3/47	0.149051	0.713846	-1.21293	2.30877	VAMP8;P2RX4;MYLK
regulation of interferon-gamma secretion (GO:1902713)	1/10	0.250757	0.713846	-1.66686	2.30572	RASGRP1
nuclear mRNA surveillance (GO:0071028)	1/11	0.272083	0.713846	-1.7701	2.30405	EXOSC8
wound healing (GO:0042060)	3/51	0.176771	0.713846	-1.3248	2.29575	MYOF;MIA3;HPSE
tetrahydrofolate interconversion (GO:0035999)	1/8	0.206214	0.713846	-1.45234	2.29302	TYMS
semaphorin-plexin signaling pathway (GO:0071526)	2/30	0.209702	0.713846	-1.46711	2.29173	SEMA4D;FLNA
mitochondrion organization (GO:0007005)	8/168	0.107438	0.713846	-1.02687	2.29079	ATP5B;RHOT2;PID1;DNAJA3;LONP1;BID;TRAK1;ATAD3A
positive regulation of protein kinase activity (GO:0045860)	8/173	0.121367	0.713846	-1.08588	2.29006	RPTOR;MAP3K1;DAB2IP;PRKAG2;STK4;RHOA;TGFBR2;STK3
intrinsic apoptotic signaling pathway (GO:0097193)	5/102	0.165461	0.713846	-1.27118	2.28687	BRSK2;DAB2IP;HTRA2;IKBKE;FHIT
sphingolipid metabolic process (GO:0006665)	6/117	0.117025	0.713846	-1.06582	2.28657	CERK;SGMS1;SPHK1;PSAP;HEXA;CERS2
negative regulation of I-kappaB kinase/NF-kappaB signaling (GO:0043124)	3/48	0.155845	0.713846	-1.22852	2.28369	DAB2IP;TRIM59;ESR1
primary neural tube formation (GO:0014020)	2/29	0.199235	0.713846	-1.41413	2.28137	FUZ;BBS4
negative regulation of signal transduction (GO:0009968)	12/284	0.11307	0.713846	-1.04256	2.27252	SOCS2;PTPRE;PID1;UBASH3B;PRKCB;FLT3;TMBIM1;DAB2IP;BTRC;FGFR2;EGFR;FAM129B
N-acetylneuraminate metabolic process (GO:0006054)	1/11	0.272083	0.713846	-1.74517	2.27159	GNE
morphogenesis of an epithelial sheet (GO:0002011)	1/12	0.292804	0.713846	-1.84688	2.26843	MPP5
epithelial cell differentiation involved in kidney development (GO:0035850)	1/8	0.206214	0.713846	-1.43651	2.26803	MTSS1
sensory perception (GO:0007600)	3/55	0.205766	0.713846	-1.43209	2.26416	P2RX4;CDH23;BBS4
regulation of anion transport (GO:0044070)	1/8	0.206214	0.713846	-1.42972	2.2573	NCOR1
negative regulation of Notch signaling pathway (GO:0045746)	2/30	0.209702	0.713846	-1.44367	2.25511	EGFR;FAM129B
mitochondrion distribution (GO:0048311)	1/12	0.292804	0.713846	-1.83121	2.24919	TRAK1
eye photoreceptor cell development (GO:0042462)	1/13	0.312936	0.713846	-1.93167	2.24413	BBS4
response to lipopolysaccharide (GO:0032496)	7/156	0.15748	0.713846	-1.21197	2.24027	SELP;CD86;GFI1;DAB2IP;PDE4B;RHOA;FOXP1
negative regulation of mitotic nuclear division (GO:0045839)	1/10	0.250757	0.713846	-1.61909	2.23964	TOM1L2
glutathione metabolic process (GO:0006749)	3/50	0.169709	0.713846	-1.25955	2.23402	GCLC;GSS;GSR
positive regulation of calcium-mediated signaling (GO:0050850)	2/29	0.199235	0.713846	-1.3828	2.23083	P2RX5;P2RX4
relaxation of muscle (GO:0090075)	1/12	0.292804	0.713846	-1.81544	2.22982	P2RX4
regulation of axon regeneration (GO:0048679)	1/11	0.272083	0.713846	-1.71237	2.22891	CERS2
fatty acid beta-oxidation (GO:0006635)	3/51	0.176771	0.713846	-1.2841	2.22522	GCDH;SCP2;ECI2
adenylate cyclase-inhibiting dopamine receptor signaling pathway (GO:0007195)	1/11	0.272083	0.713846	-1.70805	2.22328	FLNA
peptidyl-tyrosine modification (GO:0018212)	3/52	0.183912	0.713846	-1.31192	2.22148	FLT3;FGFR2;EGFR
regulation of cilium movement (GO:0003352)	1/9	0.228806	0.713846	-1.49911	2.21101	DNAAF1
regulation of endothelial cell chemotaxis (GO:2001026)	1/14	0.332495	0.713846	-2.00674	2.20968	P2RX4
pentose metabolic process (GO:0019321)	1/8	0.206214	0.713846	-1.39905	2.20887	RPE
regulation of hemopoiesis (GO:1903706)	1/12	0.292804	0.713846	-1.79708	2.20727	PRKCB
mitotic cell cycle phase transition (GO:0044772)	10/222	0.103094	0.713846	-0.971389	2.20711	PRIM2;BRSK2;CCND1;ORC3;ORC2;RPA2;MCM10;BCAT1;BTRC;SDCCAG8
positive regulation of lymphocyte proliferation (GO:0050671)	4/72	0.148819	0.713846	-1.15769	2.20542	CD86;BST1;ANXA1;IL6ST
hydrogen ion transmembrane transport (GO:1902600)	2/29	0.199235	0.713846	-1.3669	2.20518	ATP5B;UCP2
sphingosine metabolic process (GO:0006670)	1/10	0.250757	0.713846	-1.59265	2.20307	SPHK1
glycosphingolipid metabolic process (GO:0006687)	3/55	0.205766	0.713846	-1.39281	2.20205	CERK;PSAP;HEXA
regulation of interleukin-1 secretion (GO:0050704)	1/10	0.250757	0.713846	-1.58865	2.19754	FOXP1
lymphocyte mediated immunity (GO:0002449)	1/12	0.292804	0.713846	-1.7876	2.19562	SLA2
JNK cascade (GO:0007254)	4/67	0.12329	0.713846	-1.04848	2.19469	MDFIC;DAB2IP;ARHGEF6;MAP3K12
molybdopterin cofactor biosynthetic process (GO:0032324)	1/8	0.206214	0.713846	-1.3877	2.19095	NFS1
ribosome biogenesis (GO:0042254)	10/227	0.114714	0.713846	-1.01118	2.18951	BOP1;RPL3;PDCD11;RPS18;TEX10;XRN2;EXOSC8;RPL13A;RPS11;RPL18
negative regulation of protein exit from endoplasmic reticulum (GO:0070862)	1/10	0.250757	0.713846	-1.57701	2.18143	OS9
regulation of synapse maturation (GO:0090128)	1/11	0.272083	0.713846	-1.67572	2.1812	DAB2IP
regulation of RNA polymerase II transcriptional preinitiation complex assembly (GO:0045898)	1/12	0.292804	0.713846	-1.77144	2.17578	ESR1
regulation of cell-cell adhesion mediated by integrin (GO:0033632)	1/8	0.206214	0.713846	-1.37643	2.17316	DPP4
cellular macromolecule biosynthetic process (GO:0034645)	14/368	0.167108	0.713846	-1.21255	2.16939	THRB;RPL3;RPA2;RPL13A;MCM10;TYMS;ESR1;EEF2K;RPS18;ORC3;ORC2;POLR2I;RPS11;RPL18
cellular response to interferon-beta (GO:0035458)	1/12	0.292804	0.713846	-1.76591	2.16899	HTRA2
negative regulation of secretion by cell (GO:1903531)	2/31	0.220222	0.713846	-1.42272	2.15274	VAMP8;ANXA1
axonal transport of mitochondrion (GO:0019896)	1/10	0.250757	0.713846	-1.55541	2.15155	TRAK1
negative regulation of intracellular steroid hormone receptor signaling pathway (GO:0033144)	2/29	0.199235	0.713846	-1.32613	2.1394	CNOT2;FOXP1
endonucleolytic cleavage of tricistronic rRNA transcript (SSU-rRNA, 5.8S rRNA, LSU-rRNA) (GO:0000479)	1/12	0.292804	0.713846	-1.73849	2.13531	KRI1
protein neddylation (GO:0045116)	1/14	0.332495	0.713846	-1.93716	2.13307	DCUN1D1
cellular response to fluid shear stress (GO:0071498)	1/13	0.312936	0.713846	-1.83525	2.13212	MTSS1
ribosomal large subunit assembly (GO:0000027)	2/31	0.220222	0.713846	-1.40825	2.13085	BOP1;RPL3
positive regulation of receptor recycling (GO:0001921)	1/11	0.272083	0.713846	-1.62958	2.12114	ECE1
myeloid dendritic cell differentiation (GO:0043011)	1/11	0.272083	0.713846	-1.62938	2.12088	TGFBR2
positive regulation of transcription from RNA polymerase III promoter (GO:0045945)	1/11	0.272083	0.713846	-1.62712	2.11794	RPTOR
sphingolipid catabolic process (GO:0030149)	1/12	0.292804	0.713846	-1.72375	2.1172	SPHK1
positive regulation of glial cell differentiation (GO:0045687)	1/11	0.272083	0.713846	-1.61682	2.10454	TENM4
response to sterol (GO:0036314)	1/12	0.292804	0.713846	-1.71142	2.10206	TGFBR2
negative regulation of proteasomal protein catabolic process (GO:1901799)	2/29	0.199235	0.713846	-1.30264	2.10151	HSP90AB1;FHIT
lung development (GO:0030324)	2/30	0.209702	0.713846	-1.34262	2.09726	DNAAF1;FGFR2
cellular response to cadmium ion (GO:0071276)	2/30	0.209702	0.713846	-1.34249	2.09706	SUMO1;EGFR
regulation of cell morphogenesis (GO:0022604)	2/29	0.199235	0.713846	-1.29703	2.09247	ZMYM1;CD44
negative regulation of ATP metabolic process (GO:1903579)	1/13	0.312936	0.713846	-1.80062	2.09188	PID1
regulation of signal transduction (GO:0009966)	10/234	0.132162	0.713846	-1.03161	2.0877	SOCS2;BST1;MDFIC;UBASH3B;FLT3;GFI1;FUZ;ESR1;FGFR2;EGFR
regulation of cell migration involved in sprouting angiogenesis (GO:0090049)	2/31	0.220222	0.713846	-1.3742	2.07933	ANXA1;RHOA
regulation of mitotic centrosome separation (GO:0046602)	1/12	0.292804	0.713846	-1.68974	2.07543	CEP85
cellular response to alcohol (GO:0097306)	2/29	0.199235	0.713846	-1.28411	2.07161	CTNNA1;SPIDR
nuclear-transcribed mRNA poly(A) tail shortening (GO:0000289)	2/30	0.209702	0.713846	-1.32507	2.06985	ZCCHC11;CNOT2
tetrahydrofolate metabolic process (GO:0046653)	1/14	0.332495	0.713846	-1.87817	2.06811	TYMS
regulation of calcium ion transport (GO:0051924)	3/53	0.191128	0.713846	-1.24918	2.06715	P2RX4;HOMER2;MYLK
regulation of phospholipase C activity (GO:1900274)	1/11	0.272083	0.713846	-1.58709	2.06583	ESR1
lysine metabolic process (GO:0006553)	1/13	0.312936	0.713846	-1.77714	2.0646	GCDH
hippo signaling (GO:0035329)	2/31	0.220222	0.713846	-1.3619	2.06072	STK4;STK3
regulation of I-kappaB kinase/NF-kappaB signaling (GO:0043122)	9/205	0.131773	0.713846	-1.01532	2.05772	AKAP13;PRKCB;DAB2IP;FLNA;TRIM59;RBCK1;IKBKE;ESR1;RHOA
DNA replication-dependent nucleosome assembly (GO:0006335)	1/11	0.272083	0.713846	-1.5765	2.05205	HAT1
positive regulation of apoptotic process (GO:0043065)	12/308	0.169985	0.713846	-1.15747	2.05109	FGD3;TIAM2;AKAP13;DAB2IP;ARHGEF3;ARHGEF4;HTRA2;STK4;BID;FGD1;ARHGEF6;STK3
regulation of actin filament length (GO:0030832)	1/11	0.272083	0.713846	-1.57576	2.05108	NEB
positive regulation of coagulation (GO:0050820)	1/10	0.250757	0.713846	-1.4786	2.04531	HPSE
negative regulation of homotypic cell-cell adhesion (GO:0034111)	1/11	0.272083	0.713846	-1.57046	2.04418	PRKG1
regulation of pseudopodium assembly (GO:0031272)	1/13	0.312936	0.713846	-1.75564	2.03963	CDC42EP4
relaxation of cardiac muscle (GO:0055119)	1/12	0.292804	0.713846	-1.65861	2.03719	P2RX4
positive regulation of cell growth (GO:0030307)	5/99	0.151731	0.713846	-1.08018	2.03684	RPTOR;SEMA4D;CPNE5;SPHK1;EGFR
purine nucleoside bisphosphate biosynthetic process (GO:0034033)	1/8	0.206214	0.713846	-1.28638	2.03099	ACOT7
negative regulation of sodium ion transmembrane transport (GO:1902306)	1/11	0.272083	0.713846	-1.55912	2.02942	HECW2
regulation of translation (GO:0006417)	9/214	0.157949	0.713846	-1.0994	2.02893	NUP214;RBM3;NUP210;CNOT2;FAM129A;RPL13A;GEMIN5;TYMS;POLR2I
positive regulation of muscle contraction (GO:0045933)	1/14	0.332495	0.713846	-1.83916	2.02515	SPHK1
GPI anchor biosynthetic process (GO:0006506)	2/33	0.241379	0.713846	-1.42282	2.02238	PIGL;MPPE1
regulation of protein import into nucleus, translocation (GO:0033158)	1/13	0.312936	0.713846	-1.7389	2.02018	UBR5
negative regulation of cellular macromolecule biosynthetic process (GO:2000113)	20/513	0.0974311	0.713846	-0.867056	2.01904	POU2F1;ZC3H4;GFI1;DAB2IP;RPL13A;ARID5B;IKZF1;FOXN3;TYMS;RUNX2;FAM129B;FOXP1;GCLC;CDAN1;BCL7A;SUMO1;MDFIC;CNOT2;CIC;BTRC
negative regulation of heart contraction (GO:0045822)	1/12	0.292804	0.713846	-1.64246	2.01735	PDE4D
activation of JUN kinase activity (GO:0007257)	2/31	0.220222	0.713846	-1.32908	2.01106	MDFIC;DAB2IP
contractile actin filament bundle assembly (GO:0030038)	1/11	0.272083	0.713846	-1.54424	2.01005	RHOA
regulation of B cell apoptotic process (GO:0002902)	1/11	0.272083	0.713846	-1.54411	2.00988	FOXP1
regulation of calcidiol 1-monooxygenase activity (GO:0060558)	1/8	0.206214	0.713846	-1.27111	2.00688	GFI1
negative regulation of homeostatic process (GO:0032845)	2/29	0.199235	0.713846	-1.23704	1.99568	UBASH3B;TSC22D3
positive regulation of T-helper 1 type immune response (GO:0002827)	1/13	0.312936	0.713846	-1.71361	1.9908	ANXA1
cellular glucan metabolic process (GO:0006073)	1/13	0.312936	0.713846	-1.70873	1.98513	PRKAG2
regulation of striated muscle contraction (GO:0006942)	2/30	0.209702	0.713846	-1.27071	1.98494	P2RX4;RNF207
medium-chain fatty acid metabolic process (GO:0051791)	1/11	0.272083	0.713846	-1.52234	1.98155	ACOT7
cyclic-nucleotide-mediated signaling (GO:0019935)	2/33	0.241379	0.713846	-1.39375	1.98107	PDE4D;ADGRG6
respiratory system development (GO:0060541)	2/30	0.209702	0.713846	-1.2657	1.97711	DNAAF1;FGFR2
protein dephosphorylation (GO:0006470)	6/126	0.150336	0.713846	-1.04028	1.97122	PTPRE;UBASH3B;SSU72;PPP2R5A;BTRC;RPAP2
establishment of epithelial cell apical/basal polarity (GO:0045198)	1/10	0.250757	0.713846	-1.4233	1.96881	RHOA
regulation of interleukin-2 biosynthetic process (GO:0045076)	1/13	0.312936	0.713846	-1.69356	1.96751	CD86
positive regulation of voltage-gated potassium channel activity (GO:1903818)	1/10	0.250757	0.713846	-1.42116	1.96585	RNF207
positive regulation of mitotic cell cycle (GO:0045931)	3/53	0.191128	0.713846	-1.18637	1.96321	DMRT1;SPHK1;PKN2
U4 snRNA 3'-end processing (GO:0034475)	1/9	0.228806	0.713846	-1.33058	1.96244	EXOSC8
negative regulation of phosphorylation (GO:0042326)	4/76	0.170569	0.713846	-1.10799	1.95961	PID1;PRKDC;FAM129A;DAB2IP
microtubule anchoring at microtubule organizing center (GO:0072393)	1/12	0.292804	0.713846	-1.5933	1.95697	BBS4
alternative mRNA splicing, via spliceosome (GO:0000380)	1/13	0.312936	0.713846	-1.67891	1.95048	CELF4
positive regulation of type 2 immune response (GO:0002830)	1/11	0.272083	0.713846	-1.49702	1.94859	CD86
positive regulation of heterotypic cell-cell adhesion (GO:0034116)	1/12	0.292804	0.713846	-1.5814	1.94235	CD44
negative regulation of T cell apoptotic process (GO:0070233)	1/10	0.250757	0.713846	-1.3991	1.93534	TSC22D3
superoxide anion generation (GO:0042554)	1/11	0.272083	0.713846	-1.48621	1.93452	DUOX1
proton transport (GO:0015992)	2/32	0.230785	0.713846	-1.316	1.92961	ATP5B;UCP2
epithelial cell apoptotic process (GO:1904019)	1/10	0.250757	0.713846	-1.38855	1.92074	DAB2IP
positive regulation of pseudopodium assembly (GO:0031274)	1/13	0.312936	0.713846	-1.65136	1.91848	CDC42EP4
chondroitin sulfate catabolic process (GO:0030207)	1/14	0.332495	0.713846	-1.73878	1.91463	HEXA
epidermal growth factor receptor signaling pathway (GO:0007173)	3/58	0.228169	0.713846	-1.29534	1.91408	PIGR;DGKD;EGFR
endothelial tube morphogenesis (GO:0061154)	1/11	0.272083	0.713846	-1.47037	1.91391	RHOA
alpha-linolenic acid metabolic process (GO:0036109)	1/14	0.332495	0.713846	-1.73042	1.90542	SCP2
positive regulation of peptidyl-serine phosphorylation (GO:0033138)	4/84	0.216998	0.713846	-1.24666	1.90473	RPTOR;STK4;CD44;EGFR
liver development (GO:0001889)	2/32	0.230785	0.713846	-1.29781	1.90294	DNAAF1;ARID5B
Golgi ribbon formation (GO:0090161)	1/12	0.292804	0.713846	-1.54556	1.89834	VTI1A
nuclear RNA surveillance (GO:0071027)	1/10	0.250757	0.713846	-1.37175	1.8975	EXOSC8
tryptophan metabolic process (GO:0006568)	1/11	0.272083	0.713846	-1.45765	1.89734	KMO
negative regulation of vascular smooth muscle cell proliferation (GO:1904706)	1/13	0.312936	0.713846	-1.63243	1.89649	PRKG1
regulation of protein exit from endoplasmic reticulum (GO:0070861)	1/11	0.272083	0.713846	-1.45496	1.89384	BRSK2
regulation of glucose import in response to insulin stimulus (GO:2001273)	1/14	0.332495	0.713846	-1.71948	1.89337	PID1
positive regulation of ossification (GO:0045778)	3/53	0.191128	0.713846	-1.14392	1.89298	IL6ST;ACVR2A;RUNX2
negative regulation of reactive oxygen species biosynthetic process (GO:1903427)	1/14	0.332495	0.713846	-1.71501	1.88845	SLC18A2
regulation of Wnt signaling pathway (GO:0030111)	5/110	0.204284	0.713846	-1.18567	1.88313	MDFIC;DAAM2;BTRC;ESR1;FGFR2
regulation of cell communication by electrical coupling (GO:0010649)	1/13	0.312936	0.713846	-1.61731	1.87892	PDE4D
negative regulation of glucose transport (GO:0010829)	1/11	0.272083	0.713846	-1.44336	1.87874	PRKCB
RNA transport (GO:0050658)	4/81	0.199181	0.713846	-1.16312	1.87674	NUP214;DHX38;SRSF5;TGFBR2
myeloid cell activation involved in immune response (GO:0002275)	1/12	0.292804	0.713846	-1.52766	1.87635	DOCK2
regulation of lipid kinase activity (GO:0043550)	1/12	0.292804	0.713846	-1.52698	1.87552	PPP2R5A
negative regulation of response to stimulus (GO:0048585)	6/128	0.158262	0.713846	-1.01585	1.87272	NCOR1;UBASH3B;FLT3;ESR1;FGFR2;EGFR
internal protein amino acid acetylation (GO:0006475)	1/12	0.292804	0.713846	-1.52145	1.86873	HAT1
regulation of intracellular estrogen receptor signaling pathway (GO:0033146)	2/31	0.220222	0.713846	-1.23434	1.86769	CNOT2;ESR1
T cell differentiation in thymus (GO:0033077)	1/12	0.292804	0.713846	-1.51492	1.8607	RAG2
connective tissue development (GO:0061448)	2/31	0.220222	0.713846	-1.22047	1.84672	ARID5B;CD44
histone phosphorylation (GO:0016572)	1/10	0.250757	0.713846	-1.33426	1.84565	MAP3K12
protein stabilization (GO:0050821)	7/153	0.146875	0.713846	-0.959887	1.84123	CRTAP;HSP90AB1;SUMO1;GNAQ;FLNA;STK4;STK3
regulation of alcohol biosynthetic process (GO:1902930)	2/35	0.262618	0.713846	-1.37626	1.84013	SREBF1;KPNB1
mitochondrion transport along microtubule (GO:0047497)	1/13	0.312936	0.713846	-1.57443	1.8291	RHOT2
positive regulation of phosphatidylinositol 3-kinase signaling (GO:0014068)	3/54	0.198414	0.713846	-1.13048	1.82844	SELP;SEMA4D;FLT3
organelle transport along microtubule (GO:0072384)	2/32	0.230785	0.713846	-1.24363	1.82349	RHOT2;TRAK1
regulation of protein localization to cell periphery (GO:1904375)	1/13	0.312936	0.713846	-1.56713	1.82062	VAMP8
neural tube closure (GO:0001843)	2/34	0.251993	0.713846	-1.31873	1.81768	FUZ;BBS4
protein localization to endoplasmic reticulum (GO:0070972)	1/14	0.332495	0.713846	-1.64652	1.81303	TAPT1
cellular response to nutrient levels (GO:0031669)	3/55	0.205766	0.713846	-1.14456	1.80956	RPTOR;SREBF1;RIPOR1
ribonucleoprotein complex assembly (GO:0022618)	7/157	0.161091	0.713846	-0.990523	1.80848	BOP1;RPL3;HSP90AB1;SCAF11;GEMIN5;ERAL1;SRSF5
regulation of protein kinase C signaling (GO:0090036)	1/12	0.292804	0.713846	-1.47027	1.80586	ULK4
regulation of cellular response to stress (GO:0080135)	5/105	0.179663	0.713846	-1.05085	1.80396	NUP214;RPTOR;HSP90AB1;NUP210;RPA2
retrograde vesicle-mediated transport, Golgi to ER (GO:0006890)	4/81	0.199181	0.713846	-1.11726	1.80274	NBAS;KIF2A;ERGIC2;ARCN1
nuclear-transcribed mRNA catabolic process, nonsense-mediated decay (GO:0000184)	5/113	0.219567	0.713846	-1.18399	1.79504	RPL3;RPS18;RPL13A;RPS11;RPL18
positive regulation of protein import into nucleus (GO:0042307)	3/54	0.198414	0.713846	-1.1088	1.79337	UBR5;FLNA;EGFR
response to cadmium ion (GO:0046686)	2/32	0.230785	0.713846	-1.21982	1.78859	SUMO1;EGFR
regulation of defense response (GO:0031347)	4/76	0.170569	0.713846	-1.00478	1.77707	BST1;ANXA1;USP18;FOXP1
T-helper cell differentiation (GO:0042093)	1/12	0.292804	0.713846	-1.44631	1.77644	FOXP1
regulation of hair cycle (GO:0042634)	1/10	0.250757	0.713846	-1.28376	1.77579	HPSE
positive regulation of cellular process (GO:0048522)	19/520	0.160246	0.713846	-0.967574	1.77167	CD86;SAP30BP;HSP90AB1;TENM4;FLT3;SPHK1;NSMCE1;HTRA2;EGFR;TGFBR2;DPP4;RPTOR;BST1;P2RX5;P2RX4;CCND1;FLNA;IL6ST;FGFR2
regulation of defense response to virus by virus (GO:0050690)	2/29	0.199235	0.713846	-1.09819	1.77167	DOCK2;AP2A2
positive regulation of G2/M transition of mitotic cell cycle (GO:0010971)	1/17	0.387902	0.718814	-1.87059	1.77145	CCND1
regulation of vascular endothelial growth factor signaling pathway (GO:1900746)	1/12	0.292804	0.713846	-1.4415	1.77053	DAB2IP
tryptophan catabolic process (GO:0006569)	1/11	0.272083	0.713846	-1.35221	1.7601	KMO
viral RNA genome replication (GO:0039694)	1/13	0.312936	0.713846	-1.51437	1.75933	PI4KA
diacylglycerol metabolic process (GO:0046339)	1/14	0.332495	0.713846	-1.59726	1.75879	DGKD
cellular response to leucine (GO:0071233)	1/10	0.250757	0.713846	-1.26475	1.7495	RPTOR
cellular protein localization (GO:0034613)	13/328	0.14475	0.713846	-0.903494	1.74622	RABGAP1L;RABGAP1;RAB27A;TBC1D2B;EGFR;ARCN1;TBC1D1;AHI1;FLNA;TBC1D17;SNX8;TBC1D22A;BBS4
positive regulation of endothelial cell chemotaxis (GO:2001028)	1/14	0.332495	0.713846	-1.58565	1.74601	P2RX4
regulation of intrinsic apoptotic signaling pathway in response to DNA damage by p53 class mediator (GO:1902165)	1/13	0.312936	0.713846	-1.50238	1.74541	CD44
positive regulation of viral genome replication (GO:0045070)	2/32	0.230785	0.713846	-1.18715	1.74067	TBC1D20;PKN2
cardiocyte differentiation (GO:0035051)	1/14	0.332495	0.713846	-1.57788	1.73745	AKAP13
dopamine receptor signaling pathway (GO:0007212)	2/29	0.199235	0.713846	-1.07569	1.73539	GNAQ;FLNA
interleukin-27-mediated signaling pathway (GO:0070106)	1/12	0.292804	0.713846	-1.41189	1.73415	IL6ST
low-density lipoprotein particle remodeling (GO:0034374)	1/12	0.292804	0.713846	-1.40977	1.73155	LIPC
ribosome assembly (GO:0042255)	3/57	0.220648	0.713846	-1.14519	1.7306	BOP1;RPL3;ERAL1
double-strand break repair (GO:0006302)	6/142	0.218361	0.713846	-1.1346	1.72641	SUMO1;PRKDC;NSD2;NSMCE1;RPA2;SPIDR
regulation of cell cycle (GO:0051726)	9/216	0.164087	0.713846	-0.955108	1.72623	BOP1;MAP3K1;SON;CCND1;HTRA2;STK4;FGFR2;TTC28;STK3
positive regulation by host of viral process (GO:0044794)	1/12	0.292804	0.713846	-1.40491	1.72559	TBC1D20
positive regulation of skeletal muscle tissue development (GO:0048643)	1/13	0.312936	0.713846	-1.48471	1.72487	FAM129B
regulation of triglyceride biosynthetic process (GO:0010866)	1/14	0.332495	0.713846	-1.5633	1.72139	SREBF1
regulation of cell-matrix adhesion (GO:0001952)	3/53	0.191128	0.713846	-1.038	1.7177	BST1;RASA1;RHOA
cell-substrate junction assembly (GO:0007044)	1/12	0.292804	0.713846	-1.39841	1.7176	LAMB3
positive regulation of alpha-beta T cell proliferation (GO:0046641)	1/14	0.332495	0.713846	-1.55791	1.71546	TGFBR2
positive regulation of nuclease activity (GO:0032075)	1/11	0.272083	0.713846	-1.31726	1.71461	DAB2IP
glycosaminoglycan catabolic process (GO:0006027)	3/57	0.220648	0.713846	-1.13408	1.71381	HEXA;HPSE;CD44
peptidyl-tyrosine phosphorylation (GO:0018108)	4/80	0.193345	0.713846	-1.04164	1.71171	FLT3;SLA2;FGFR2;EGFR
neuromuscular process controlling balance (GO:0050885)	1/15	0.351499	0.713846	-1.63325	1.70764	CDH23
cellular response to nitrogen compound (GO:1901699)	1/15	0.351499	0.713846	-1.62952	1.70374	SPIDR
regulation of gene silencing by RNA (GO:0060966)	3/56	0.213179	0.713846	-1.10229	1.70373	NUP214;NUP210;POLR2I
regulation of posttranscriptional gene silencing (GO:0060147)	3/56	0.213179	0.713846	-1.10114	1.70195	NUP214;NUP210;POLR2I
regulation of IRE1-mediated unfolded protein response (GO:1903894)	1/13	0.312936	0.713846	-1.46395	1.70076	DAB2IP
positive regulation of G1/S transition of mitotic cell cycle (GO:1900087)	1/17	0.387902	0.718814	-1.79541	1.70026	RPTOR
low-density lipoprotein receptor particle metabolic process (GO:0032799)	1/12	0.292804	0.713846	-1.38389	1.69976	AP2A2
skeletal system morphogenesis (GO:0048705)	2/32	0.230785	0.713846	-1.15887	1.69921	FUZ;FGFR2
triglyceride-rich lipoprotein particle remodeling (GO:0034370)	1/14	0.332495	0.713846	-1.54304	1.69909	LIPC
fatty acid metabolic process (GO:0006631)	5/107	0.189375	0.713846	-1.01855	1.69488	CPT1A;ACBD5;ACOT7;LIPC;GPX4
regulation of synapse organization (GO:0050807)	1/15	0.351499	0.713846	-1.62018	1.69397	CTNNA2
mitochondrial genome maintenance (GO:0000002)	1/14	0.332495	0.713846	-1.53818	1.69373	LONP1
dendrite morphogenesis (GO:0048813)	2/33	0.241379	0.713846	-1.18736	1.6877	CTNNA2;SHANK2
negative regulation of signal transduction by p53 class mediator (GO:1901797)	1/16	0.369963	0.713846	-1.69123	1.68168	CD44
adaptive immune response based on somatic recombination of immune receptors built from immunoglobulin superfamily domains (GO:0002460)	1/15	0.351499	0.713846	-1.60734	1.68055	SLA2
regulation of cell-substrate adhesion (GO:0010810)	2/34	0.251993	0.713846	-1.21882	1.67996	BST1;RHOA
protein import (GO:0017038)	3/57	0.220648	0.713846	-1.10898	1.67587	NUP214;RPAIN;KPNB1
protein prenylation (GO:0018342)	1/11	0.272083	0.713846	-1.28118	1.66764	FNTB
neuron projection morphogenesis (GO:0048812)	7/164	0.187376	0.713846	-0.995768	1.66755	BRSK2;DAB2IP;SLIT1;CTNNA2;SRGAP2;FGFR2;SHANK2
negative regulation of transcription from RNA polymerase II promoter (GO:0000122)	21/566	0.131186	0.713846	-0.819345	1.6642	NFIX;SEMA4D;DMRT1;GFI1;DAB2IP;ARID5B;SLA2;ESR1;DCAF1;NR6A1;NCOR1;SUMO1;CUX1;CCND1;CNOT2;DNAJA3;NRIP1;ORC2;MXD1;CIC;FGFR2
regulation of plasma membrane bounded cell projection organization (GO:0120035)	1/14	0.332495	0.713846	-1.51015	1.66287	ULK4
regulation of mitotic sister chromatid separation (GO:0010965)	1/16	0.369963	0.713846	-1.66978	1.66035	HECW2
platelet aggregation (GO:0070527)	2/34	0.251993	0.713846	-1.2041	1.65968	UBASH3B;FLNA
regulation of non-canonical Wnt signaling pathway (GO:2000050)	1/12	0.292804	0.713846	-1.35112	1.65952	DAAM2
regulation of granulocyte chemotaxis (GO:0071622)	1/14	0.332495	0.713846	-1.50588	1.65817	BST1
retinol metabolic process (GO:0042572)	1/13	0.312936	0.713846	-1.4266	1.65737	DHRS9
positive regulation of vascular endothelial growth factor receptor signaling pathway (GO:0030949)	1/13	0.312936	0.713846	-1.42445	1.65486	PRKCB
regulation of DNA recombination (GO:0000018)	2/34	0.251993	0.713846	-1.19925	1.65299	RPA2;SPIDR
purine ribonucleoside monophosphate biosynthetic process (GO:0009168)	2/40	0.315608	0.713846	-1.43099	1.65029	ATP5B;PRKAG2
negative regulation of cell communication (GO:0010648)	4/79	0.187562	0.713846	-0.985093	1.64869	UBASH3B;FLT3;FGFR2;EGFR
regulation of lamellipodium morphogenesis (GO:2000392)	1/12	0.292804	0.713846	-1.34184	1.64812	CD44
tRNA-containing ribonucleoprotein complex export from nucleus (GO:0071431)	2/34	0.251993	0.713846	-1.19299	1.64436	NUP214;NUP210
regulation of peptidyl-tyrosine phosphorylation (GO:0050730)	4/86	0.229108	0.713846	-1.11452	1.64232	BST1;SEMA4D;CD44;EGFR
positive regulation of mRNA splicing, via spliceosome (GO:0048026)	1/11	0.272083	0.713846	-1.26143	1.64194	CELF4
tRNA export from nucleus (GO:0006409)	2/34	0.251993	0.713846	-1.18818	1.63773	NUP214;NUP210
negative regulation of hydrolase activity (GO:0051346)	5/109	0.199271	0.713846	-1.01201	1.63247	ARFGEF1;GPSM1;PXK;CSRNP2;DAB2IP
immune response-regulating cell surface receptor signaling pathway (GO:0002768)	1/12	0.292804	0.713846	-1.32372	1.62586	PIGR
Golgi to vacuole transport (GO:0006896)	1/15	0.351499	0.713846	-1.55271	1.62343	VTI1A
smooth muscle contraction (GO:0006939)	1/15	0.351499	0.713846	-1.55154	1.62221	MYLK
regulation of fatty acid metabolic process (GO:0019217)	1/15	0.351499	0.713846	-1.54874	1.61929	PRKAG2
motile cilium assembly (GO:0044458)	1/14	0.332495	0.713846	-1.46908	1.61764	DNAAF1
cellular modified amino acid catabolic process (GO:0042219)	1/13	0.312936	0.713846	-1.39043	1.61534	GGACT
vasculogenesis (GO:0001570)	2/33	0.241379	0.713846	-1.13641	1.61528	RASA1;TGFBR2
phospholipase C-activating dopamine receptor signaling pathway (GO:0060158)	1/14	0.332495	0.713846	-1.46312	1.61108	GNAQ
maturation of SSU-rRNA from tricistronic rRNA transcript (SSU-rRNA, 5.8S rRNA, LSU-rRNA) (GO:0000462)	2/36	0.273246	0.713846	-1.23925	1.60778	PDCD11;KRI1
regulation of gastrulation (GO:0010470)	1/15	0.351499	0.713846	-1.53045	1.60016	TENM4
response to endoplasmic reticulum stress (GO:0034976)	5/107	0.189375	0.713846	-0.960283	1.59794	BRSK2;OS9;RASGRF1;FAM129A;DAB2IP
retrograde transport, endosome to Golgi (GO:0042147)	4/83	0.211011	0.713846	-1.02476	1.59436	RHOBTB3;VTI1A;TBC1D17;SNX8
intracellular protein transport (GO:0006886)	13/348	0.194534	0.713846	-0.972231	1.59169	NUP214;RPAIN;RABGAP1L;RABGAP1;RAB27A;TBC1D2B;TRAK1;ARCN1;TBC1D1;TBC1D17;SNX8;TBC1D22A;KPNB1
fatty acid beta-oxidation using acyl-CoA dehydrogenase (GO:0033539)	1/16	0.369963	0.713846	-1.59564	1.58663	GCDH
multivesicular body sorting pathway (GO:0071985)	1/14	0.332495	0.713846	-1.43656	1.58184	RAB27A
catecholamine biosynthetic process (GO:0042423)	1/14	0.332495	0.713846	-1.4353	1.58045	DDC
interleukin-2-mediated signaling pathway (GO:0038110)	1/12	0.292804	0.713846	-1.28556	1.57899	IL2RA
positive regulation of triglyceride metabolic process (GO:0090208)	1/17	0.387902	0.718814	-1.66471	1.57649	SREBF1
myelination in peripheral nervous system (GO:0022011)	1/14	0.332495	0.713846	-1.42992	1.57452	ADGRG6
negative regulation of fibroblast growth factor receptor signaling pathway (GO:0040037)	1/13	0.312936	0.713846	-1.35221	1.57094	FUZ
positive regulation of cytokinesis (GO:0032467)	2/35	0.262618	0.713846	-1.17274	1.56802	PKN2;RHOA
positive regulation of protein phosphorylation (GO:0001934)	15/413	0.20092	0.713846	-0.975818	1.56604	SEMA4D;FLT3;SPHK1;FAM129A;DAB2IP;PRKAG2;STK4;RASGRP1;ACVR2A;EGFR;RPTOR;CCND3;CCND1;CD44;FGFR2
positive regulation of cell migration involved in sprouting angiogenesis (GO:0090050)	1/17	0.387902	0.718814	-1.65275	1.56516	ANXA1
mitochondrion localization (GO:0051646)	1/16	0.369963	0.713846	-1.57177	1.5629	TRAK1
regulation of cell communication by electrical coupling involved in cardiac conduction (GO:1901844)	1/10	0.250757	0.713846	-1.12812	1.5605	PDE4D
positive regulation of protein dephosphorylation (GO:0035307)	2/32	0.230785	0.713846	-1.06192	1.55706	HSP90AB1;PPP2R5A
quinone biosynthetic process (GO:1901663)	1/15	0.351499	0.713846	-1.48634	1.55404	PDSS1
negative regulation of cell migration involved in sprouting angiogenesis (GO:0090051)	1/15	0.351499	0.713846	-1.48567	1.55333	RHOA
positive regulation of neuron migration (GO:2001224)	1/13	0.312936	0.713846	-1.32918	1.54418	DAB2IP
embryonic organ morphogenesis (GO:0048562)	2/34	0.251993	0.713846	-1.11972	1.54338	FUZ;FGFR2
phosphatidylinositol-mediated signaling (GO:0048015)	3/57	0.220648	0.713846	-1.02015	1.54163	PI4KA;PI4KB;RHOA
rRNA 3'-end processing (GO:0031125)	1/13	0.312936	0.713846	-1.32625	1.54078	EXOSC8
mitochondrial outer membrane permeabilization (GO:0097345)	1/13	0.312936	0.713846	-1.32517	1.53953	RHOT2
keratan sulfate metabolic process (GO:0042339)	2/35	0.262618	0.713846	-1.15026	1.53796	HEXA;ST3GAL6
dendritic spine morphogenesis (GO:0060997)	1/17	0.387902	0.718814	-1.61387	1.52834	SHANK2
positive regulation of calcium ion transport into cytosol (GO:0010524)	2/33	0.241379	0.713846	-1.07432	1.52703	P2RX5;P2RX4
positive regulation of canonical Wnt signaling pathway (GO:0090263)	5/114	0.224738	0.713846	-1.0208	1.52388	PSMD6;DAAM2;UBR5;FGFR2;RNF220
negative regulation of secretion (GO:0051048)	1/15	0.351499	0.713846	-1.45419	1.52043	VAMP8
regulation of actomyosin structure organization (GO:0110020)	1/13	0.312936	0.713846	-1.30846	1.52012	AKAP13
regulation of phosphatidylinositol 3-kinase activity (GO:0043551)	2/34	0.251993	0.713846	-1.10084	1.51735	FLT3;DAB2IP
regulation of defense response to virus (GO:0050688)	1/15	0.351499	0.713846	-1.45118	1.51728	RNF216
negative regulation of intrinsic apoptotic signaling pathway by p53 class mediator (GO:1902254)	1/15	0.351499	0.713846	-1.44985	1.51589	CD44
ceramide biosynthetic process (GO:0046513)	2/33	0.241379	0.713846	-1.06535	1.51428	SGMS1;CERS2
G-protein coupled acetylcholine receptor signaling pathway (GO:0007213)	1/17	0.387902	0.718814	-1.58995	1.50569	GNAQ
negative regulation of ATPase activity (GO:0032780)	1/13	0.312936	0.713846	-1.29187	1.50084	PXK
activation of MAPKK activity (GO:0000186)	2/34	0.251993	0.713846	-1.0863	1.49731	STK4;STK3
positive regulation of granulocyte macrophage colony-stimulating factor production (GO:0032725)	1/13	0.312936	0.713846	-1.28661	1.49473	RASGRP1
regulation of cell morphogenesis involved in differentiation (GO:0010769)	2/37	0.283866	0.713846	-1.17808	1.4835	SEMA4D;HECW2
pancreas development (GO:0031016)	1/15	0.351499	0.713846	-1.41822	1.48282	DNAAF1
modulation by virus of host process (GO:0019054)	1/14	0.332495	0.713846	-1.34477	1.48077	KPNB1
regulation of platelet aggregation (GO:0090330)	1/15	0.351499	0.713846	-1.41188	1.47619	PRKG1
positive regulation of I-kappaB kinase/NF-kappaB signaling (GO:0043123)	7/164	0.187376	0.713846	-0.88127	1.47581	AKAP13;PRKCB;SPHK1;FLNA;RBCK1;IKBKE;RHOA
thyroid hormone generation (GO:0006590)	1/11	0.272083	0.713846	-1.13315	1.47496	DUOX1
cellular response to cytokine stimulus (GO:0071345)	17/457	0.158973	0.713846	-0.800331	1.47183	CD86;SELPLG;PID1;POU2F1;ANXA1;FLT3;DAB2IP;HTRA2;RPL13A;RHOA;SOCS2;DUOX1;CCND1;IL2RA;ST3GAL6;IL6ST;SOCS6
positive regulation of muscle cell differentiation (GO:0051149)	2/35	0.262618	0.713846	-1.10027	1.47112	CTNNA1;CTNNA2
stress fiber assembly (GO:0043149)	1/11	0.272083	0.713846	-1.12994	1.47078	RHOA
glycogen metabolic process (GO:0005977)	2/34	0.251993	0.713846	-1.06676	1.47038	PYGB;PRKAG2
regulation of anatomical structure morphogenesis (GO:0022603)	4/83	0.211011	0.713846	-0.944465	1.46944	AKAP13;ZMYM1;PID1;FGFR2
pathway-restricted SMAD protein phosphorylation (GO:0060389)	1/14	0.332495	0.713846	-1.3289	1.46329	TGFBR2
regulation of establishment of cell polarity (GO:2000114)	1/16	0.369963	0.713846	-1.46708	1.4588	ARFGEF1
microtubule depolymerization (GO:0007019)	1/16	0.369963	0.713846	-1.46673	1.45845	KIF2A
negative regulation of platelet activation (GO:0010544)	1/16	0.369963	0.713846	-1.4667	1.45842	PRKG1
regulation of mitotic metaphase/anaphase transition (GO:0030071)	1/16	0.369963	0.713846	-1.46521	1.45693	HECW2
long-term memory (GO:0007616)	1/18	0.405331	0.720112	-1.61192	1.45565	RASGRF1
tRNA transport (GO:0051031)	2/36	0.273246	0.713846	-1.12128	1.45473	NUP214;NUP210
negative regulation of apoptotic process (GO:0043066)	18/486	0.154812	0.713846	-0.777554	1.45056	ANXA1;SEMA4D;FLT3;PRKDC;SPHK1;ATAD3A;EGFR;FAM129B;SOCS2;AHI1;GCLC;SON;RASA1;FLNA;BID;IL6ST;CD44;FGFR2
negative regulation of DNA-dependent DNA replication (GO:2000104)	1/16	0.369963	0.713846	-1.45853	1.45029	PID1
lysine catabolic process (GO:0006554)	1/13	0.312936	0.713846	-1.24821	1.45012	GCDH
phosphatidylinositol metabolic process (GO:0046488)	5/113	0.219567	0.713846	-0.956271	1.4498	MTMR14;PI4KA;TTC7B;PI4KB;IP6K1
regulation of receptor recycling (GO:0001919)	1/18	0.405331	0.720112	-1.60539	1.44975	ECE1
positive regulation of coenzyme metabolic process (GO:0051197)	1/16	0.369963	0.713846	-1.45678	1.44855	PFKFB3
protein modification by small protein conjugation (GO:0032446)	15/399	0.167522	0.713846	-0.81053	1.44813	NUP214;NUP210;CRBN;PRKDC;DCUN1D1;KLHL32;RCHY1;BACH2;SUMO1;OS9;HECW2;UBR5;FBXL2;BTRC;RNF220
MAPK cascade (GO:0000165)	11/279	0.173593	0.713846	-0.826872	1.44789	PSMD6;SYNGAP1;IL2RA;RASA1;RASGRF1;DAB2IP;BTRC;RASGRP1;FGFR2;EGFR;MAP3K12
epithelium development (GO:0060429)	5/116	0.235187	0.713846	-0.995936	1.44149	FN3K;AHI1;CPT1A;DHRS9;FGFR2
regulation of response to external stimulus (GO:0032101)	5/108	0.194301	0.713846	-0.87749	1.43763	BST1;ANXA1;FNTB;USP18;FOXP1
lipoxygenase pathway (GO:0019372)	1/16	0.369963	0.713846	-1.42799	1.41993	GPX4
neural crest cell differentiation (GO:0014033)	1/16	0.369963	0.713846	-1.42693	1.41887	TAPT1
tRNA modification (GO:0006400)	3/58	0.228169	0.713846	-0.959675	1.41808	NSUN2;TRMT13;CDKAL1
positive regulation of myotube differentiation (GO:0010831)	1/17	0.387902	0.718814	-1.49578	1.41651	FAM129B
positive regulation of lipid localization (GO:1905954)	1/11	0.272083	0.713846	-1.08637	1.41406	IKBKE
interleukin-35-mediated signaling pathway (GO:0070757)	1/12	0.292804	0.713846	-1.15017	1.41269	IL6ST
regulation of extracellular matrix disassembly (GO:0010715)	1/15	0.351499	0.713846	-1.3458	1.4071	DPP4
miRNA metabolic process (GO:0010586)	1/17	0.387902	0.718814	-1.47741	1.39911	ZCCHC11
G-protein coupled glutamate receptor signaling pathway (GO:0007216)	1/16	0.369963	0.713846	-1.4001	1.39219	HOMER2
positive regulation of cardiac muscle cell proliferation (GO:0060045)	1/14	0.332495	0.713846	-1.26371	1.39151	FGFR2
N-glycan processing (GO:0006491)	1/18	0.405331	0.720112	-1.53558	1.38671	GNPTAB
neuron apoptotic process (GO:0051402)	1/17	0.387902	0.718814	-1.46247	1.38496	BID
positive regulation of protein complex assembly (GO:0031334)	4/89	0.247575	0.713846	-0.989915	1.38196	SUMO1;RPA2;BID;SPIDR
negative regulation of DNA replication (GO:0008156)	1/17	0.387902	0.718814	-1.45895	1.38163	CDAN1
regulation of monocyte differentiation (GO:0045655)	1/15	0.351499	0.713846	-1.32086	1.38102	FOXP1
branching involved in blood vessel morphogenesis (GO:0001569)	1/15	0.351499	0.713846	-1.32037	1.38051	TGFBR2
cardiac left ventricle morphogenesis (GO:0003214)	1/15	0.351499	0.713846	-1.32013	1.38026	TGFBR2
C-terminal protein amino acid modification (GO:0018410)	4/83	0.211011	0.713846	-0.88605	1.37856	AGBL4;BST1;NTM;ATG4B
modification-dependent protein catabolic process (GO:0019941)	6/142	0.218361	0.713846	-0.905773	1.37823	OS9;UBR5;UBR4;LONP1;RCHY1;BTRC
positive regulation of natural killer cell mediated cytotoxicity (GO:0045954)	1/18	0.405331	0.720112	-1.52056	1.37314	RASGRP1
positive regulation of organelle organization (GO:0010638)	2/34	0.251993	0.713846	-0.994972	1.37142	ANXA1;HTRA2
regulation of cyclin-dependent protein serine/threonine kinase activity involved in G1/S transition of mitotic cell cycle (GO:0031657)	1/15	0.351499	0.713846	-1.30968	1.36933	EGFR
establishment of protein localization to membrane (GO:0090150)	4/84	0.216998	0.713846	-0.895286	1.36788	ATG4B;BID;EGFR;SEC63
embryonic limb morphogenesis (GO:0030326)	2/35	0.262618	0.713846	-1.02198	1.36644	MBNL1;ECE1
positive regulation of cell morphogenesis involved in differentiation (GO:0010770)	3/59	0.235737	0.713846	-0.944785	1.36525	CUX1;FLNA;RHOA
mesenchymal cell development (GO:0014031)	1/16	0.369963	0.713846	-1.36585	1.35814	TAPT1
regulation of cell-substrate junction assembly (GO:0090109)	1/16	0.369963	0.713846	-1.3658	1.35809	RHOA
regulation of MAP kinase activity (GO:0043405)	4/88	0.241382	0.713846	-0.946169	1.34486	FLT3;DAB2IP;RASGRP1;EGFR
urate metabolic process (GO:0046415)	1/12	0.292804	0.713846	-1.09481	1.3447	SLC2A9
regulation of type I interferon production (GO:0032479)	4/86	0.229108	0.713846	-0.9124	1.34448	RNF216;PRKDC;DTX4;IKBKE
negative regulation of reactive oxygen species metabolic process (GO:2000378)	1/18	0.405331	0.720112	-1.48873	1.3444	SLC18A2
negative regulation of signaling (GO:0023057)	4/84	0.216998	0.713846	-0.87945	1.34368	UBASH3B;FLT3;FGFR2;EGFR
regulation of nitric-oxide synthase activity (GO:0050999)	2/37	0.283866	0.713846	-1.06605	1.34243	NOSTRIN;EGFR
positive regulation of developmental process (GO:0051094)	5/114	0.224738	0.713846	-0.893495	1.33383	HSP90AB1;ESRRB;TAPT1;FGFR2;FAM129B
DNA replication-independent nucleosome organization (GO:0034724)	1/14	0.332495	0.713846	-1.20661	1.32864	HAT1
glycerophospholipid catabolic process (GO:0046475)	1/16	0.369963	0.713846	-1.33539	1.32785	LIPC
ncRNA transcription (GO:0098781)	1/15	0.351499	0.713846	-1.26902	1.32683	RPAP2
regulation of granulocyte macrophage colony-stimulating factor production (GO:0032645)	1/14	0.332495	0.713846	-1.20301	1.32467	RASGRP1
regulation of vesicle-mediated transport (GO:0060627)	6/139	0.204865	0.713846	-0.834433	1.32291	TBC1D1;RABGAP1L;RABGAP1;TBC1D2B;TBC1D17;TBC1D22A
negative regulation of translational initiation (GO:0045947)	1/17	0.387902	0.718814	-1.39634	1.32234	PAIP2B
establishment or maintenance of actin cytoskeleton polarity (GO:0030950)	1/15	0.351499	0.713846	-1.25741	1.31468	RHOA
positive regulation of acute inflammatory response (GO:0002675)	1/16	0.369963	0.713846	-1.32132	1.31386	IL6ST
regulation of interleukin-1 beta production (GO:0032651)	1/14	0.332495	0.713846	-1.18709	1.30714	FOXP1
regulation of angiotensin levels in blood (GO:0002002)	1/13	0.312936	0.713846	-1.12348	1.30521	ECE1
negative regulation of pathway-restricted SMAD protein phosphorylation (GO:0060394)	1/11	0.272083	0.713846	-1.00139	1.30346	LDLRAD4
positive regulation of hydrolase activity (GO:0051345)	7/173	0.223518	0.713846	-0.866403	1.2981	SEMA4D;TBC1D20;RASGRF1;SRGAP2;RASGRP1;RHOA;ARHGAP23
organophosphate biosynthetic process (GO:0090407)	2/37	0.283866	0.713846	-1.02877	1.29548	NFS1;AGPAT3
positive regulation of interleukin-4 production (GO:0032753)	1/16	0.369963	0.713846	-1.30274	1.29538	CD86
positive regulation of phosphoprotein phosphatase activity (GO:0032516)	1/16	0.369963	0.713846	-1.3013	1.29395	HSP90AB1
negative regulation of axon extension involved in axon guidance (GO:0048843)	1/16	0.369963	0.713846	-1.30087	1.29352	SEMA4D
lymphocyte proliferation (GO:0046651)	2/37	0.283866	0.713846	-1.02292	1.28811	CR2;FLT3
bone morphogenesis (GO:0060349)	1/17	0.387902	0.718814	-1.36008	1.288	FGFR2
negative regulation of DNA damage response, signal transduction by p53 class mediator (GO:0043518)	1/13	0.312936	0.713846	-1.10841	1.28771	CD44
regulation of cellular protein catabolic process (GO:1903362)	1/18	0.405331	0.720112	-1.42563	1.28742	DAB2IP
regulation of nitric oxide biosynthetic process (GO:0045428)	2/33	0.241379	0.713846	-0.903124	1.28369	P2RX4;HSP90AB1
cellular biogenic amine biosynthetic process (GO:0042401)	1/16	0.369963	0.713846	-1.28957	1.28229	DDC
amyloid precursor protein metabolic process (GO:0042982)	1/14	0.332495	0.713846	-1.16374	1.28143	TMCC2
myeloid cell development (GO:0061515)	1/16	0.369963	0.713846	-1.2882	1.28092	FOXP1
neuron projection development (GO:0031175)	7/168	0.203136	0.713846	-0.803531	1.28073	SAMD14;RASGRF1;DAB2IP;MAP4;SRGAP2;FRYL;SHANK2
virion assembly (GO:0019068)	1/18	0.405331	0.720112	-1.41622	1.27892	TBC1D20
positive regulation of mitotic cell cycle phase transition (GO:1901992)	2/41	0.326124	0.713846	-1.14066	1.27809	RPTOR;CCND1
response to cholesterol (GO:0070723)	1/16	0.369963	0.713846	-1.28121	1.27397	TGFBR2
establishment of apical/basal cell polarity (GO:0035089)	1/13	0.312936	0.713846	-1.0964	1.27375	RHOA
macroautophagy (GO:0016236)	5/111	0.209338	0.713846	-0.813987	1.27292	VAMP8;MTMR14;PRKAG2;ATG4B;SNAP29
stabilization of membrane potential (GO:0030322)	1/17	0.387902	0.718814	-1.34025	1.26922	KCNK7
cardiac muscle cell differentiation (GO:0055007)	1/16	0.369963	0.713846	-1.27162	1.26444	AKAP13
negative regulation of peptidyl-serine phosphorylation (GO:0033137)	1/19	0.422264	0.722391	-1.46653	1.26433	PDE4D
anterograde synaptic vesicle transport (GO:0048490)	1/16	0.369963	0.713846	-1.27086	1.26369	AP3M1
spermatid development (GO:0007286)	2/37	0.283866	0.713846	-1.00313	1.2632	KLHL32;BBS4
regulation of cholesterol biosynthetic process (GO:0045540)	2/41	0.326124	0.713846	-1.12719	1.263	SREBF1;KPNB1
guanosine-containing compound metabolic process (GO:1901068)	1/17	0.387902	0.718814	-1.33341	1.26275	GMPR2
positive regulation of axonogenesis (GO:0050772)	2/38	0.294472	0.713846	-1.02967	1.25885	SEMA4D;RHOA
regulation of transcription from RNA polymerase I promoter (GO:0006356)	1/18	0.405331	0.720112	-1.39069	1.25586	FLNA
gene expression (GO:0010467)	15/412	0.198436	0.713846	-0.774951	1.25332	NUP214;THRB;RPL3;NUP210;RPL13A;ESR1;RBM3;HNRNPUL1;RPS18;XRN2;DHX38;SRSF5;POLR2I;RPS11;RPL18
positive regulation of glycolytic process (GO:0045821)	1/16	0.369963	0.713846	-1.25343	1.24636	PFKFB3
positive regulation of antigen receptor-mediated signaling pathway (GO:0050857)	1/17	0.387902	0.718814	-1.31142	1.24192	PRKCB
regulation of DNA repair (GO:0006282)	2/38	0.294472	0.713846	-1.01558	1.24162	UBR5;EGFR
positive regulation of cell cycle G2/M phase transition (GO:1902751)	1/18	0.405331	0.720112	-1.37469	1.24141	CCND1
DNA damage checkpoint (GO:0000077)	2/39	0.305055	0.713846	-1.04353	1.23894	STK4;STK3
hemidesmosome assembly (GO:0031581)	1/12	0.292804	0.713846	-1.00832	1.23847	LAMB3
apoptotic DNA fragmentation (GO:0006309)	1/16	0.369963	0.713846	-1.24187	1.23486	KPNB1
positive regulation of RNA metabolic process (GO:0051254)	2/36	0.273246	0.713846	-0.949278	1.23158	RBM20;EGFR
retrograde protein transport, ER to cytosol (GO:0030970)	1/19	0.422264	0.722391	-1.42488	1.22842	OS9
macrophage activation (GO:0042116)	1/18	0.405331	0.720112	-1.35231	1.22121	FOXP1
maturation of 5.8S rRNA (GO:0000460)	1/18	0.405331	0.720112	-1.347	1.21641	PDCD11
DNA replication-dependent nucleosome organization (GO:0034723)	1/11	0.272083	0.713846	-0.933419	1.21498	HAT1
regulation of systemic arterial blood pressure by hormone (GO:0001990)	1/17	0.387902	0.718814	-1.27575	1.20814	ECE1
regulation of cellular amide metabolic process (GO:0034248)	2/39	0.305055	0.713846	-1.01579	1.20601	RBM3;GEMIN5
regulation of proteasomal ubiquitin-dependent protein catabolic process (GO:0032434)	4/89	0.247575	0.713846	-0.863184	1.20504	HSP90AB1;SUMO1;RCHY1;FHIT
regulation of cardiac muscle cell membrane repolarization (GO:0099623)	1/19	0.422264	0.722391	-1.39769	1.20498	FLNA
cell junction assembly (GO:0034329)	3/60	0.243349	0.713846	-0.85205	1.20417	FLNA;CDH8;RHOA
keratan sulfate catabolic process (GO:0042340)	1/13	0.312936	0.713846	-1.03482	1.20221	HEXA
organic hydroxy compound transport (GO:0015850)	2/37	0.283866	0.713846	-0.952786	1.1998	SLC10A1;SLCO2B1
regulation of mRNA splicing, via spliceosome (GO:0048024)	3/61	0.251	0.713846	-0.866609	1.19792	MBNL1;SON;CELF4
phospholipid biosynthetic process (GO:0008654)	2/38	0.294472	0.713846	-0.979779	1.19785	SGMS1;AGPAT3
negative regulation of response to wounding (GO:1903035)	1/17	0.387902	0.718814	-1.26443	1.19742	CERS2
negative regulation of cell-substrate adhesion (GO:0010812)	2/36	0.273246	0.713846	-0.915007	1.18711	RASA1;RHOA
stress-activated MAPK cascade (GO:0051403)	3/63	0.266402	0.713846	-0.896808	1.18625	BTRC;ARHGEF6;MAP3K12
modulation by virus of host morphology or physiology (GO:0019048)	1/19	0.422264	0.722391	-1.3758	1.18611	KPNB1
synaptic vesicle cycle (GO:0099504)	1/14	0.332495	0.713846	-1.07595	1.18476	SLC18A2
ubiquinone biosynthetic process (GO:0006744)	1/16	0.369963	0.713846	-1.18662	1.17992	PDSS1
ubiquinone metabolic process (GO:0006743)	1/15	0.351499	0.713846	-1.12805	1.17944	PDSS1
protein kinase C-activating G-protein coupled receptor signaling pathway (GO:0007205)	1/13	0.312936	0.713846	-1.01422	1.17828	DGKD
positive regulation of potassium ion transmembrane transport (GO:1901381)	1/16	0.369963	0.713846	-1.18156	1.17488	FLNA
positive regulation of immune system process (GO:0002684)	1/17	0.387902	0.718814	-1.23638	1.17085	MIA3
negative regulation of translation (GO:0017148)	4/89	0.247575	0.713846	-0.838449	1.17051	PAIP2B;CNOT2;RPL13A;TYMS
positive regulation of actin cytoskeleton reorganization (GO:2000251)	1/19	0.422264	0.722391	-1.35536	1.16849	BAIAP2L1
regulation of response to DNA damage stimulus (GO:2001020)	2/37	0.283866	0.713846	-0.927414	1.16785	NSMCE1;RPA2
sulfur compound catabolic process (GO:0044273)	2/36	0.273246	0.713846	-0.89899	1.16633	HEXA;HPSE
cell-cell adhesion via plasma-membrane adhesion molecules (GO:0098742)	6/143	0.222925	0.713846	-0.776764	1.16586	SELP;KIRREL3;TENM4;CDH23;CDH8;TGFBR2
embryonic appendage morphogenesis (GO:0035113)	1/14	0.332495	0.713846	-1.05756	1.16451	MBNL1
vesicle-mediated transport in synapse (GO:0099003)	2/37	0.283866	0.713846	-0.922953	1.16223	RAB27A;SPG11
negative regulation of androgen receptor signaling pathway (GO:0060766)	1/13	0.312936	0.713846	-0.999097	1.16071	FOXP1
regulation of blood vessel size (GO:0050880)	1/13	0.312936	0.713846	-0.998991	1.16059	GCLC
sensory organ development (GO:0007423)	2/41	0.326124	0.713846	-1.03424	1.15885	AHI1;ECE1
endothelial cell migration (GO:0043542)	2/36	0.273246	0.713846	-0.892937	1.15848	DPP4;RHOA
myelination (GO:0042552)	2/38	0.294472	0.713846	-0.945027	1.15536	PLLP;ADGRG6
negative regulation of nucleic acid-templated transcription (GO:1903507)	16/445	0.202066	0.713846	-0.720314	1.1519	POU2F1;ZC3H4;GFI1;DAB2IP;ARID5B;IKZF1;FOXN3;RUNX2;FAM129B;FOXP1;GCLC;BCL7A;SUMO1;MDFIC;CIC;BTRC
glycosaminoglycan metabolic process (GO:0030203)	3/62	0.258685	0.713846	-0.851702	1.15162	HEXA;HPSE;HS2ST1
negative regulation of ERAD pathway (GO:1904293)	1/13	0.312936	0.713846	-0.989257	1.14928	OS9
protein targeting to membrane (GO:0006612)	3/62	0.258685	0.713846	-0.839904	1.13567	TRAM1;ATG4B;SEC63
endocardial cushion morphogenesis (GO:0003203)	1/16	0.369963	0.713846	-1.14199	1.13554	TGFBR2
skeletal muscle contraction (GO:0003009)	1/19	0.422264	0.722391	-1.31676	1.13521	RCSD1
embryonic hemopoiesis (GO:0035162)	1/12	0.292804	0.713846	-0.91836	1.12798	TGFBR2
regulation of myelination (GO:0031641)	1/18	0.405331	0.720112	-1.24634	1.12551	TENM4
catecholamine metabolic process (GO:0006584)	1/16	0.369963	0.713846	-1.12998	1.1236	DDC
heme biosynthetic process (GO:0006783)	1/17	0.387902	0.718814	-1.18534	1.12252	FECH
adenylate cyclase-inhibiting G-protein coupled receptor signaling pathway (GO:0007193)	3/64	0.274145	0.713846	-0.867061	1.12206	PSAP;FLNA;GNAI2
rRNA catabolic process (GO:0016075)	1/18	0.405331	0.720112	-1.24224	1.12181	EXOSC8
positive regulation of hormone secretion (GO:0046887)	1/18	0.405331	0.720112	-1.24129	1.12095	VAMP8
regulation of activin receptor signaling pathway (GO:0032925)	1/15	0.351499	0.713846	-1.06622	1.11478	ACVR2A
positive regulation of smooth muscle contraction (GO:0045987)	1/15	0.351499	0.713846	-1.06196	1.11033	SPHK1
negative regulation of STAT cascade (GO:1904893)	2/42	0.336596	0.713846	-1.01917	1.10975	SOCS2;SOCS6
regulation of transcription factor import into nucleus (GO:0042990)	1/20	0.438717	0.723206	-1.34219	1.10583	FLNA
regulation of hormone secretion (GO:0046883)	1/13	0.312936	0.713846	-0.951653	1.10559	ANXA1
T cell differentiation (GO:0030217)	2/39	0.305055	0.713846	-0.930699	1.10498	ANXA1;RAG2
regulation of mitochondrial outer membrane permeabilization involved in apoptotic signaling pathway (GO:1901028)	1/18	0.405331	0.720112	-1.22172	1.10328	BID
RNA 3'-end processing (GO:0031123)	3/62	0.258685	0.713846	-0.814782	1.1017	ZCCHC11;DHX38;SRSF5
vesicle cytoskeletal trafficking (GO:0099518)	1/21	0.454701	0.731624	-1.39581	1.10006	TRAK1
regulation of alternative mRNA splicing, via spliceosome (GO:0000381)	2/40	0.315608	0.713846	-0.953771	1.09994	MBNL1;CELF4
positive regulation of cardiac muscle hypertrophy (GO:0010613)	1/17	0.387902	0.718814	-1.1592	1.09777	IL6ST
positive regulation of phagocytosis (GO:0050766)	2/40	0.315608	0.713846	-0.950181	1.0958	RAB27A;DOCK2
nuclear export (GO:0051168)	4/93	0.272665	0.713846	-0.840499	1.09224	NUP214;DHX38;PHAX;SRSF5
phosphatidic acid biosynthetic process (GO:0006654)	2/41	0.326124	0.713846	-0.971987	1.08909	LIPH;AGPAT3
androgen receptor signaling pathway (GO:0030521)	2/41	0.326124	0.713846	-0.971888	1.08898	NRIP1;ARID1A
negative regulation of interleukin-8 production (GO:0032717)	1/18	0.405331	0.720112	-1.20356	1.08688	ANXA1
regulation of cell development (GO:0060284)	1/21	0.454701	0.731624	-1.37059	1.08018	AKAP13
purine ribonucleoside bisphosphate metabolic process (GO:0034035)	1/20	0.438717	0.723206	-1.30985	1.07919	SULT6B1
regulation of protein localization to membrane (GO:1905475)	1/18	0.405331	0.720112	-1.19246	1.07685	VAMP8
pre-miRNA processing (GO:0031054)	1/14	0.332495	0.713846	-0.977391	1.07623	ZCCHC11
cellular response to acid chemical (GO:0071229)	4/92	0.266349	0.713846	-0.811279	1.07328	RPTOR;PID1;ABCB4;HTRA2
response to nutrient levels (GO:0031667)	1/19	0.422264	0.722391	-1.24348	1.07203	RPTOR
digestive tract morphogenesis (GO:0048546)	1/16	0.369963	0.713846	-1.06989	1.06385	FGFR2
positive regulation of lipid storage (GO:0010884)	1/20	0.438717	0.723206	-1.29115	1.06378	IKBKE
neural crest cell development (GO:0014032)	2/36	0.273246	0.713846	-0.818813	1.06231	SEMA4D;TAPT1
positive regulation of T cell proliferation (GO:0042102)	3/62	0.258685	0.713846	-0.785136	1.06162	CD86;ANXA1;IL6ST
membrane lipid biosynthetic process (GO:0046467)	3/61	0.251	0.713846	-0.766685	1.05979	SGMS1;SPHK1;CERS2
organic cyclic compound biosynthetic process (GO:1901362)	2/38	0.294472	0.713846	-0.865673	1.05835	NFS1;SCP2
glycolipid biosynthetic process (GO:0009247)	2/43	0.347019	0.713846	-0.99266	1.05061	PIGL;MPPE1
regulation of protein kinase activity (GO:0045859)	6/148	0.246196	0.713846	-0.746315	1.04605	SOCS2;UBASH3B;GNAQ;PRKAG2;CEP85;SOCS6
protein localization to nucleus (GO:0034504)	4/97	0.29816	0.713846	-0.862698	1.04397	NUP214;RPAIN;BBS4;KPNB1
regulation of T cell proliferation (GO:0042129)	3/63	0.266402	0.713846	-0.788957	1.04359	CD86;ANXA1;IL6ST
ureteric bud development (GO:0001657)	1/18	0.405331	0.720112	-1.15478	1.04282	FGFR2
establishment of mitotic spindle localization (GO:0040001)	1/19	0.422264	0.722391	-1.20291	1.03705	KPNB1
sodium-independent organic anion transport (GO:0043252)	2/38	0.294472	0.713846	-0.847605	1.03626	SLC22A14;SLCO2B1
regulation of protein catabolic process (GO:0042176)	4/92	0.266349	0.713846	-0.781382	1.03373	HECW2;DAB2IP;FLNA;EGFR
vitamin D metabolic process (GO:0042359)	1/16	0.369963	0.713846	-1.03957	1.0337	CUBN
regulation of cardiac muscle cell proliferation (GO:0060043)	1/19	0.422264	0.722391	-1.19222	1.02784	FGFR2
acetylcholine receptor signaling pathway (GO:0095500)	1/20	0.438717	0.723206	-1.24516	1.02589	GNAQ
cellular response to fatty acid (GO:0071398)	1/13	0.312936	0.713846	-0.880163	1.02254	PID1
regulation of protein homooligomerization (GO:0032462)	1/16	0.369963	0.713846	-1.0229	1.01712	BID
chromatin disassembly (GO:0031498)	1/20	0.438717	0.723206	-1.23222	1.01523	ARID1A
outer dynein arm assembly (GO:0036158)	1/19	0.422264	0.722391	-1.17603	1.01389	DNAAF1
atrioventricular valve morphogenesis (GO:0003181)	1/16	0.369963	0.713846	-1.01887	1.01312	TGFBR2
macromolecule biosynthetic process (GO:0009059)	1/20	0.438717	0.723206	-1.22799	1.01174	TRAM2
selective autophagy (GO:0061912)	1/16	0.369963	0.713846	-1.017	1.01126	WDFY3
RNA export from nucleus (GO:0006405)	5/120	0.256473	0.713846	-0.742255	1.01001	NUP214;NUP210;DHX38;PHAX;SRSF5
purine ribonucleoside monophosphate metabolic process (GO:0009167)	2/40	0.315608	0.713846	-0.874719	1.00878	GMPR2;NT5C2
negative regulation of fibroblast proliferation (GO:0048147)	1/19	0.422264	0.722391	-1.16257	1.00228	DAB2IP
positive regulation of cellular metabolic process (GO:0031325)	4/93	0.272665	0.713846	-0.769096	0.999449	AHI1;PID1;ECE1;TGFBR2
epithelial cilium movement (GO:0003351)	1/16	0.369963	0.713846	-1.00283	0.997166	DNAAF1
positive regulation of regulated secretory pathway (GO:1903307)	1/17	0.387902	0.718814	-1.04719	0.991696	RAB27A
stem cell development (GO:0048864)	1/15	0.351499	0.713846	-0.948212	0.991401	TAPT1
nucleosome disassembly (GO:0006337)	1/20	0.438717	0.723206	-1.2012	0.989667	ARID1A
response to fatty acid (GO:0070542)	1/14	0.332495	0.713846	-0.897906	0.98871	PID1
purine-containing compound catabolic process (GO:0072523)	1/15	0.351499	0.713846	-0.945054	0.988099	NT5C2
aspartate family amino acid catabolic process (GO:0009068)	1/20	0.438717	0.723206	-1.19714	0.986325	GCDH
negative regulation of catabolic process (GO:0009895)	2/41	0.326124	0.713846	-0.879824	0.985824	FLNA;EGFR
positive regulation of dendrite extension (GO:1903861)	1/18	0.405331	0.720112	-1.08924	0.983643	CPNE5
glutamate receptor signaling pathway (GO:0007215)	2/37	0.283866	0.713846	-0.775465	0.976505	HOMER2;GNAQ
positive regulation of cardiac muscle tissue growth (GO:0055023)	1/17	0.387902	0.718814	-1.0308	0.976172	FGFR2
vesicle transport along microtubule (GO:0047496)	1/20	0.438717	0.723206	-1.18433	0.975774	TRAK1
ribosomal small subunit assembly (GO:0000028)	1/20	0.438717	0.723206	-1.18278	0.974498	ERAL1
regulation of oxidative stress-induced intrinsic apoptotic signaling pathway (GO:1902175)	1/19	0.422264	0.722391	-1.12996	0.974163	HTRA2
chromatin assembly or disassembly (GO:0006333)	1/14	0.332495	0.713846	-0.88291	0.972199	CDAN1
growth hormone receptor signaling pathway (GO:0060396)	1/21	0.454701	0.731624	-1.2307	0.969933	SOCS2
actin filament bundle organization (GO:0061572)	2/36	0.273246	0.713846	-0.746053	0.967917	BAIAP2L1;RHOA
ubiquitin-dependent protein catabolic process via the multivesicular body sorting pathway (GO:0043162)	1/19	0.422264	0.722391	-1.12024	0.96579	MVB12B
purine nucleotide catabolic process (GO:0006195)	1/15	0.351499	0.713846	-0.923521	0.965585	NT5C2
heterocycle biosynthetic process (GO:0018130)	1/18	0.405331	0.720112	-1.06634	0.962961	NFS1
response to ATP (GO:0033198)	1/15	0.351499	0.713846	-0.920079	0.961986	P2RX4
regulation of platelet activation (GO:0010543)	1/20	0.438717	0.723206	-1.16626	0.96088	SELP
regulation of cellular pH (GO:0030641)	2/39	0.305055	0.713846	-0.807602	0.958837	ATP5B;SLC4A10
negative regulation of B cell activation (GO:0050869)	1/18	0.405331	0.720112	-1.05977	0.957024	SLA2
high-density lipoprotein particle remodeling (GO:0034375)	1/18	0.405331	0.720112	-1.0569	0.954438	LIPC
regulation of type I interferon-mediated signaling pathway (GO:0060338)	2/40	0.315608	0.713846	-0.826626	0.953311	HSP90AB1;USP18
cellular response to interleukin-7 (GO:0098761)	1/20	0.438717	0.723206	-1.15652	0.95286	SOCS2
regulation of cholesterol metabolic process (GO:0090181)	2/42	0.336596	0.713846	-0.874577	0.952303	SREBF1;KPNB1
positive regulation of excitatory postsynaptic potential (GO:2000463)	1/20	0.438717	0.723206	-1.15171	0.948894	SHANK2
positive regulation of DNA repair (GO:0045739)	2/39	0.305055	0.713846	-0.79802	0.94746	SPIDR;EGFR
regulation of nucleocytoplasmic transport (GO:0046822)	1/15	0.351499	0.713846	-0.905727	0.946981	NUP214
maintenance of protein location in nucleus (GO:0051457)	1/16	0.369963	0.713846	-0.949935	0.944571	BBS4
postsynaptic membrane organization (GO:0001941)	1/17	0.387902	0.718814	-0.996974	0.944137	DNAJA3
spliceosomal complex assembly (GO:0000245)	2/42	0.336596	0.713846	-0.866981	0.944031	SCAF11;SRSF5
regulation of toll-like receptor 4 signaling pathway (GO:0034143)	1/17	0.387902	0.718814	-0.990954	0.938436	DAB2IP
transport along microtubule (GO:0010970)	1/16	0.369963	0.713846	-0.939621	0.934314	SPG11
positive regulation of MAP kinase activity (GO:0043406)	7/178	0.244577	0.713846	-0.663018	0.933678	GNG3;FLT3;DAB2IP;STK4;RASGRP1;EGFR;STK3
recombinational repair (GO:0000725)	3/72	0.336603	0.713846	-0.854324	0.930231	NSMCE1;RPA2;SPIDR
regulation of smooth muscle cell proliferation (GO:0048660)	2/45	0.367696	0.713846	-0.929184	0.929649	PRKDC;FOXP1
regulation of multicellular organism growth (GO:0040014)	1/18	0.405331	0.720112	-1.02838	0.928679	FGFR2
negative regulation of smooth muscle cell migration (GO:0014912)	1/15	0.351499	0.713846	-0.887765	0.928201	PRKG1
striated muscle cell differentiation (GO:0051146)	1/20	0.438717	0.723206	-1.12484	0.926754	AKAP13
regulation of intracellular pH (GO:0051453)	2/45	0.367696	0.713846	-0.922652	0.923114	ATP5B;SLC4A10
phototransduction, visible light (GO:0007603)	1/16	0.369963	0.713846	-0.922949	0.917737	GNAQ
positive regulation of T cell migration (GO:2000406)	1/21	0.454701	0.731624	-1.15873	0.913215	RHOA
positive regulation of viral transcription (GO:0050434)	2/42	0.336596	0.713846	-0.838654	0.913186	MDFIC;POLR2I
endothelial cell development (GO:0001885)	1/20	0.438717	0.723206	-1.10732	0.912322	PDE4D
telomere maintenance via telomerase (GO:0007004)	1/21	0.454701	0.731624	-1.15755	0.912281	HSP90AB1
reverse cholesterol transport (GO:0043691)	1/18	0.405331	0.720112	-1.00673	0.909129	LIPC
aromatic amino acid family catabolic process (GO:0009074)	1/21	0.454701	0.731624	-1.14888	0.905451	KMO
heparan sulfate proteoglycan biosynthetic process (GO:0015012)	1/16	0.369963	0.713846	-0.906588	0.901468	HS2ST1
response to X-ray (GO:0010165)	1/16	0.369963	0.713846	-0.902182	0.897087	XRRA1
iron-sulfur cluster assembly (GO:0016226)	1/19	0.422264	0.722391	-1.04018	0.896767	NFS1
negative regulation of lymphocyte activation (GO:0051250)	1/20	0.438717	0.723206	-1.0883	0.896656	SLA2
positive regulation of transcription initiation from RNA polymerase II promoter (GO:0060261)	1/18	0.405331	0.720112	-0.990737	0.894687	ESR1
nuclear-transcribed mRNA catabolic process, deadenylation-dependent decay (GO:0000288)	3/64	0.274145	0.713846	-0.69029	0.893304	ZCCHC11;CNOT2;EXOSC8
regulation of protein modification by small protein conjugation or removal (GO:1903320)	1/15	0.351499	0.713846	-0.854153	0.893058	HSP90AB1
brain development (GO:0007420)	5/120	0.256473	0.713846	-0.656159	0.892858	CTNNA2;CIC;SHANK2;BBS4;TGFBR2
axon development (GO:0061564)	4/95	0.285371	0.713846	-0.709724	0.88997	BRSK2;SLIT1;CTNNA2;FGFR2
plasma membrane bounded cell projection organization (GO:0120036)	5/119	0.251106	0.713846	-0.643956	0.889869	SAMD14;RASGRF1;MNS1;MAP4;FRYL
regulation of smooth muscle contraction (GO:0006940)	1/24	0.499979	0.746796	-1.2765	0.884854	SPHK1
negative regulation of DNA metabolic process (GO:0051053)	2/44	0.357388	0.713846	-0.859072	0.883929	CDAN1;FAM129B
regulation of phagocytosis (GO:0050764)	2/42	0.336596	0.713846	-0.810727	0.882778	RAB27A;DOCK2
response to organic cyclic compound (GO:0014070)	3/70	0.320953	0.713846	-0.775895	0.881775	SOCS2;ABCB4;ESR1
preassembly of GPI anchor in ER membrane (GO:0016254)	1/18	0.405331	0.720112	-0.975152	0.880613	PIGL
establishment of endothelial barrier (GO:0061028)	1/22	0.470231	0.736476	-1.16696	0.880505	PDE4D
C21-steroid hormone metabolic process (GO:0008207)	1/23	0.48532	0.738489	-1.21476	0.878204	DHRS9
DNA replication (GO:0006260)	5/121	0.261866	0.713846	-0.651135	0.872469	RPAIN;ORC3;ORC2;RPA2;MCM10
protein-DNA complex disassembly (GO:0032986)	1/22	0.470231	0.736476	-1.15523	0.87166	ARID1A
epithelial cell differentiation (GO:0030855)	4/97	0.29816	0.713846	-0.714347	0.864449	FN3K;CPT1A;DHRS9;FGFR2
regulation of lipid catabolic process (GO:0050994)	1/18	0.405331	0.720112	-0.950813	0.858633	LONP2
termination of RNA polymerase II transcription (GO:0006369)	3/69	0.313128	0.713846	-0.738941	0.858017	SSU72;DHX38;SRSF5
cristae formation (GO:0042407)	1/28	0.554566	0.766544	-1.45409	0.857289	ATP5B
osteoclast differentiation (GO:0030316)	1/20	0.438717	0.723206	-1.04	0.856854	FOXP1
negative regulation of type I interferon production (GO:0032480)	2/45	0.367696	0.713846	-0.855064	0.855491	RNF216;IKBKE
regulation of fibroblast proliferation (GO:0048145)	2/47	0.388111	0.718814	-0.898522	0.850419	SPHK1;DAB2IP
regulation of gene silencing by miRNA (GO:0060964)	3/68	0.305308	0.713846	-0.713615	0.846659	NUP214;NUP210;POLR2I
nucleotide-excision repair, preincision complex stabilization (GO:0006293)	1/22	0.470231	0.736476	-1.12122	0.845997	RPA2
positive regulation of biosynthetic process (GO:0009891)	1/23	0.48532	0.738489	-1.16918	0.845254	RAB27A
interleukin-7-mediated signaling pathway (GO:0038111)	1/20	0.438717	0.723206	-1.02571	0.845081	SOCS2
positive regulation of gene silencing by miRNA (GO:2000637)	1/21	0.454701	0.731624	-1.06728	0.841138	EGFR
sphingolipid biosynthetic process (GO:0030148)	3/67	0.297496	0.713846	-0.691437	0.838267	SGMS1;SPHK1;CERS2
regulation of toll-like receptor signaling pathway (GO:0034121)	1/21	0.454701	0.731624	-1.06085	0.836069	GFI1
muscle tissue morphogenesis (GO:0060415)	1/20	0.438717	0.723206	-1.01324	0.834806	MYLK
actin filament bundle assembly (GO:0051017)	2/38	0.294472	0.713846	-0.682195	0.834032	BAIAP2L1;RHOA
cellular response to alkaloid (GO:0071312)	1/22	0.470231	0.736476	-1.09932	0.82947	SPIDR
negative regulation of protein tyrosine kinase activity (GO:0061099)	1/22	0.470231	0.736476	-1.09871	0.82901	SH3BP5
phosphatidic acid metabolic process (GO:0046473)	2/42	0.336596	0.713846	-0.757629	0.824961	LIPH;AGPAT3
negative regulation of transport (GO:0051051)	2/41	0.326124	0.713846	-0.731939	0.820123	PXK;PRKCB
cellular response to corticosteroid stimulus (GO:0071384)	1/16	0.369963	0.713846	-0.823393	0.818743	ANXA1
embryonic digit morphogenesis (GO:0042733)	1/17	0.387902	0.718814	-0.86234	0.816639	ECE1
negative regulation of smoothened signaling pathway (GO:0045879)	1/20	0.438717	0.723206	-0.986452	0.81274	BTRC
cellular polysaccharide biosynthetic process (GO:0033692)	1/20	0.438717	0.723206	-0.98493	0.811486	HS2ST1
ventricular septum morphogenesis (GO:0060412)	1/22	0.470231	0.736476	-1.07409	0.810435	TGFBR2
JAK-STAT cascade (GO:0007259)	2/41	0.326124	0.713846	-0.722272	0.80929	SOCS2;SOCS6
positive regulation of gene expression, epigenetic (GO:0045815)	2/48	0.398209	0.720112	-0.870129	0.801194	ARID1A;ARID1B
DNA catabolic process (GO:0006308)	1/18	0.405331	0.720112	-0.886575	0.800623	XRN2
regulation of adaptive immune response (GO:0002819)	1/15	0.351499	0.713846	-0.763299	0.798066	IL6ST
regulation of adherens junction organization (GO:1903391)	1/19	0.422264	0.722391	-0.925022	0.797483	RHOA
androgen metabolic process (GO:0008209)	1/21	0.454701	0.731624	-1.01176	0.797386	DHRS9
positive regulation of transforming growth factor beta receptor signaling pathway (GO:0030511)	1/20	0.438717	0.723206	-0.963235	0.793611	HSP90AB1
amide biosynthetic process (GO:0043604)	2/45	0.367696	0.713846	-0.791939	0.792335	SGMS1;CERS2
positive regulation of double-strand break repair (GO:2000781)	1/16	0.369963	0.713846	-0.793573	0.789092	SPIDR
neuromuscular synaptic transmission (GO:0007274)	1/25	0.514222	0.75185	-1.1853	0.788346	KIF1B
sialylation (GO:0097503)	1/17	0.387902	0.718814	-0.83199	0.787897	ST3GAL6
ciliary basal body-plasma membrane docking (GO:0097711)	4/97	0.29816	0.713846	-0.648678	0.784981	AHI1;C2CD3;TMEM67;SDCCAG8
negative regulation of lipid metabolic process (GO:0045833)	1/20	0.438717	0.723206	-0.952495	0.784763	PPP2R5A
positive regulation of muscle hypertrophy (GO:0014742)	1/15	0.351499	0.713846	-0.750352	0.784529	IL6ST
glucan catabolic process (GO:0009251)	1/19	0.422264	0.722391	-0.905297	0.780478	PYGB
ATP synthesis coupled proton transport (GO:0015986)	1/28	0.554566	0.766544	-1.32217	0.77951	ATP5B
negative regulation of gene expression (GO:0010629)	21/619	0.233332	0.713846	-0.535145	0.778792	POU2F1;ZC3H4;GFI1;DAB2IP;RPL13A;ARID5B;IKZF1;FOXN3;TYMS;ESR1;RUNX2;FAM129B;FOXP1;GCLC;NCOR1;BCL7A;SUMO1;MDFIC;CNOT2;CIC;BTRC
positive regulation of heart rate (GO:0010460)	1/15	0.351499	0.713846	-0.741895	0.775687	PDE4D
cilium-dependent cell motility (GO:0060285)	1/25	0.514222	0.75185	-1.16537	0.775087	DNAH17
interleukin-6-mediated signaling pathway (GO:0070102)	1/15	0.351499	0.713846	-0.733775	0.767197	IL6ST
microtubule nucleation (GO:0007020)	1/18	0.405331	0.720112	-0.846213	0.764174	TUBGCP4
positive regulation of endothelial cell migration (GO:0010595)	3/71	0.328779	0.713846	-0.683263	0.760041	ATP5B;P2RX4;FOXP1
positive regulation of growth (GO:0045927)	3/72	0.336603	0.713846	-0.697772	0.759769	RPTOR;SPHK1;EGFR
O-glycan processing (GO:0016266)	3/66	0.289695	0.713846	-0.612488	0.758827	GALNT7;MUC5B;XXYLT1
cardiac ventricle morphogenesis (GO:0003208)	2/44	0.357388	0.713846	-0.734713	0.755971	FGFR2;TGFBR2
membrane depolarization (GO:0051899)	2/44	0.357388	0.713846	-0.733586	0.754812	P2RX4;CACNA1E
limb morphogenesis (GO:0035108)	1/22	0.470231	0.736476	-0.999642	0.754261	MBNL1
positive regulation of dendrite morphogenesis (GO:0050775)	1/17	0.387902	0.718814	-0.796225	0.754027	CUX1
purine ribonucleotide metabolic process (GO:0009150)	3/67	0.297496	0.713846	-0.620274	0.751992	GMPR2;SULT6B1;NT5C2
negative regulation of JAK-STAT cascade (GO:0046426)	2/48	0.398209	0.720112	-0.81663	0.751934	SOCS2;SOCS6
positive regulation of cysteine-type endopeptidase activity involved in apoptotic signaling pathway (GO:2001269)	1/16	0.369963	0.713846	-0.753073	0.74882	HTRA2
SCF-dependent proteasomal ubiquitin-dependent protein catabolic process (GO:0031146)	3/73	0.344422	0.713846	-0.700505	0.746659	PSMD6;FBXL2;BTRC
mRNA 3'-end processing (GO:0031124)	3/75	0.360034	0.713846	-0.729963	0.745699	SSU72;DHX38;SRSF5
negative regulation of cell motility (GO:2000146)	4/98	0.304581	0.713846	-0.626286	0.74454	FUZ;MIA3;LDLRAD4;SRGAP2
aorta morphogenesis (GO:0035909)	1/17	0.387902	0.718814	-0.784009	0.742459	MYLK
regulation of viral process (GO:0050792)	1/19	0.422264	0.722391	-0.849444	0.732326	MVB12B
nucleotide catabolic process (GO:0009166)	1/18	0.405331	0.720112	-0.809689	0.731191	NT5C2
positive regulation of cytokine biosynthetic process (GO:0042108)	2/41	0.326124	0.713846	-0.650295	0.728642	CD86;LTB
DNA catabolic process, endonucleolytic (GO:0000737)	1/23	0.48532	0.738489	-1.00535	0.726816	KPNB1
negative regulation of cell migration (GO:0030336)	5/122	0.267286	0.713846	-0.547369	0.722218	DAB2IP;FUZ;MIA3;LDLRAD4;SRGAP2
protein lipidation (GO:0006497)	5/128	0.300276	0.713846	-0.600209	0.722083	BST1;NTM;ATG4B;PIGL;MPPE1
regulation of innate immune response (GO:0045088)	3/70	0.320953	0.713846	-0.632419	0.71872	HSP90AB1;GFI1;USP18
positive regulation of dendritic spine development (GO:0060999)	1/21	0.454701	0.731624	-0.911314	0.71822	SHANK2
ncRNA 3'-end processing (GO:0043628)	1/26	0.52806	0.754644	-1.12381	0.717603	INTS2
regulation of viral transcription (GO:0046782)	2/41	0.326124	0.713846	-0.640333	0.71748	MDFIC;POLR2I
protein ubiquitination involved in ubiquitin-dependent protein catabolic process (GO:0042787)	3/71	0.328779	0.713846	-0.644136	0.716518	HECW2;UBR5;UBR4
apoptotic nuclear changes (GO:0030262)	1/24	0.499979	0.746796	-1.02609	0.711274	KPNB1
COPII-coated vesicle budding (GO:0090114)	3/69	0.313128	0.713846	-0.612003	0.710623	TBC1D20;MIA3;SEC24D
positive regulation of erythrocyte differentiation (GO:0045648)	1/23	0.48532	0.738489	-0.979348	0.708017	ACVR2A
hydrogen peroxide metabolic process (GO:0042743)	1/21	0.454701	0.731624	-0.893908	0.704502	DUOX1
regulation of regulatory T cell differentiation (GO:0045589)	1/21	0.454701	0.731624	-0.892995	0.703783	IL2RA
intrinsic apoptotic signaling pathway in response to DNA damage (GO:0008630)	2/49	0.40823	0.721993	-0.784783	0.703106	HTRA2;IKBKE
primary alcohol metabolic process (GO:0034308)	1/20	0.438717	0.723206	-0.851822	0.701817	DHRS9
positive regulation of mRNA processing (GO:0050685)	1/17	0.387902	0.718814	-0.738222	0.699099	CELF4
cellular polysaccharide catabolic process (GO:0044247)	1/20	0.438717	0.723206	-0.84709	0.697919	PYGB
organic hydroxy compound biosynthetic process (GO:1901617)	2/50	0.418168	0.722391	-0.799227	0.696823	SCP2;PRKAG2
vitamin transport (GO:0051180)	1/24	0.499979	0.746796	-1.00383	0.695843	CUBN
regulation of cartilage development (GO:0061035)	1/16	0.369963	0.713846	-0.698486	0.694541	TAPT1
cytoplasmic sequestering of protein (GO:0051220)	1/16	0.369963	0.713846	-0.697818	0.693877	FLNA
membrane lipid metabolic process (GO:0006643)	1/19	0.422264	0.722391	-0.804674	0.693728	ST3GAL6
regulation of interleukin-8 secretion (GO:2000482)	1/24	0.499979	0.746796	-0.999933	0.693142	ANXA1
negative regulation of axon guidance (GO:1902668)	1/18	0.405331	0.720112	-0.764548	0.690427	SEMA4D
mesoderm development (GO:0007498)	1/22	0.470231	0.736476	-0.913883	0.689553	IKZF1
protein O-linked glycosylation via serine (GO:0018242)	1/23	0.48532	0.738489	-0.953012	0.688978	GALNT7
protein import into nucleus (GO:0006606)	4/104	0.343347	0.713846	-0.643768	0.688198	NUP214;RERE;RPAIN;KPNB1
neurotransmitter transport (GO:0006836)	1/17	0.387902	0.718814	-0.724405	0.686014	SLC18A2
negative regulation of steroid biosynthetic process (GO:0010894)	1/17	0.387902	0.718814	-0.722966	0.684651	GFI1
negative regulation of actin filament polymerization (GO:0030837)	1/23	0.48532	0.738489	-0.945315	0.683413	ARFGEF1
negative regulation of sprouting angiogenesis (GO:1903671)	1/23	0.48532	0.738489	-0.944642	0.682926	RHOA
positive regulation of cellular biosynthetic process (GO:0031328)	6/160	0.304511	0.713846	-0.574176	0.682722	RBM3;SREBF1;P2RX4;HSP90AB1;FAM129A;EGFR
protein localization to organelle (GO:0033365)	4/98	0.304581	0.713846	-0.573784	0.682124	RIPOR1;RPA2;TRAM2;BBS4
inner dynein arm assembly (GO:0036159)	1/17	0.387902	0.718814	-0.719665	0.681525	DNAAF1
phospholipid translocation (GO:0045332)	1/22	0.470231	0.736476	-0.902621	0.681055	ABCB4
endoplasmic reticulum mannose trimming (GO:1904380)	1/20	0.438717	0.723206	-0.819492	0.675181	OS9
peripheral nervous system development (GO:0007422)	1/23	0.48532	0.738489	-0.933902	0.675162	ADGRG6
protein sumoylation (GO:0016925)	3/69	0.313128	0.713846	-0.576665	0.669591	NUP214;SUMO1;NUP210
protein targeting to peroxisome (GO:0006625)	1/16	0.369963	0.713846	-0.671597	0.667804	LONP2
gland development (GO:0048732)	3/76	0.36782	0.713846	-0.666647	0.666755	THRB;ARID5B;FGFR2
triglyceride catabolic process (GO:0019433)	1/23	0.48532	0.738489	-0.920113	0.665194	LIPC
double-strand break repair via homologous recombination (GO:0000724)	3/77	0.37559	0.718814	-0.672977	0.659018	NSMCE1;RPA2;SPIDR
cell projection assembly (GO:0030031)	1/21	0.454701	0.731624	-0.83525	0.658273	RHOBTB3
synaptic vesicle transport along microtubule (GO:0099517)	1/16	0.369963	0.713846	-0.66081	0.657078	AP3M1
organelle assembly (GO:0070925)	13/377	0.278372	0.713846	-0.513708	0.656928	DNAAF1;STARD9;FUZ;AHI1;NCOR1;TMEM67;ATG4B;FLNA;POC1B;TRIM59;WDPCP;SNAP29;BBS4
protein localization to cell surface (GO:0034394)	1/23	0.48532	0.738489	-0.908162	0.656554	FLNA
regulation of Notch signaling pathway (GO:0008593)	3/71	0.328779	0.713846	-0.58992	0.656209	MAML3;EGFR;FAM129B
release of cytochrome c from mitochondria (GO:0001836)	1/19	0.422264	0.722391	-0.757291	0.652879	BID
proteoglycan metabolic process (GO:0006029)	1/21	0.454701	0.731624	-0.827114	0.651861	HPSE
regulation of epithelial to mesenchymal transition (GO:0010717)	3/69	0.313128	0.713846	-0.561156	0.651583	DAB2IP;LDLRAD4;TGFBR2
substantia nigra development (GO:0021762)	2/44	0.357388	0.713846	-0.630473	0.648715	CNP;RHOA
long-term synaptic potentiation (GO:0060291)	1/22	0.470231	0.736476	-0.856176	0.646011	SHANK2
protein O-linked glycosylation via threonine (GO:0018243)	1/22	0.470231	0.736476	-0.854174	0.644501	GALNT7
cell morphogenesis involved in neuron differentiation (GO:0048667)	4/98	0.304581	0.713846	-0.54124	0.643435	BRSK2;SLIT1;CTNNA2;FGFR2
DNA metabolic process (GO:0006259)	11/315	0.286679	0.713846	-0.513879	0.642037	RPAIN;PRIM2;SUMO1;PRKDC;ORC3;ORC2;LONP1;POLI;RPA2;MCM10;TYMS
cellular nitrogen compound biosynthetic process (GO:0044271)	1/24	0.499979	0.746796	-0.923478	0.640144	SPHK1
cellular response to inorganic substance (GO:0071241)	1/18	0.405331	0.720112	-0.706929	0.638394	SPIDR
positive regulation of morphogenesis of an epithelium (GO:1905332)	1/19	0.422264	0.722391	-0.740077	0.638038	AHI1
adherens junction organization (GO:0034332)	2/45	0.367696	0.713846	-0.635797	0.636114	CTNNA1;CDH8
calcium-mediated signaling using intracellular calcium source (GO:0035584)	1/19	0.422264	0.722391	-0.735791	0.634343	SELP
regulation of cytoskeleton organization (GO:0051493)	4/96	0.291756	0.713846	-0.508749	0.626696	BST1;RHOBTB3;ARHGAP17;RHOA
Ras protein signal transduction (GO:0007265)	8/224	0.306868	0.713846	-0.528159	0.623935	RHOT2;RIPOR1;CDC42EP4;RHOBTB3;ARHGEF3;RAB27A;RHOA;KPNB1
endoplasmic reticulum to cytosol transport (GO:1903513)	1/17	0.387902	0.718814	-0.658086	0.62321	OS9
porphyrin-containing compound biosynthetic process (GO:0006779)	1/19	0.422264	0.722391	-0.722429	0.622823	FECH
negative regulation of ion transport (GO:0043271)	1/21	0.454701	0.731624	-0.789613	0.622306	PXK
regulation of ATPase activity (GO:0043462)	2/41	0.326124	0.713846	-0.554477	0.62128	BRSK2;PXK
negative regulation of oxidative stress-induced cell death (GO:1903202)	1/25	0.514222	0.75185	-0.925195	0.615348	HTRA2
long-chain fatty-acyl-CoA metabolic process (GO:0035336)	1/26	0.52806	0.754644	-0.957743	0.611563	ACOT7
positive regulation of synaptic transmission, glutamatergic (GO:0051968)	1/19	0.422264	0.722391	-0.708882	0.611144	SHANK2
nucleotide-excision repair, DNA incision, 3'-to lesion (GO:0006295)	1/23	0.48532	0.738489	-0.84418	0.610298	RPA2
ventricular cardiac muscle tissue development (GO:0003229)	1/22	0.470231	0.736476	-0.80723	0.60908	FGFR2
axoneme assembly (GO:0035082)	1/25	0.514222	0.75185	-0.914654	0.608337	DNAAF1
positive regulation of lymphocyte migration (GO:2000403)	1/18	0.405331	0.720112	-0.669909	0.604963	RHOA
positive regulation of natural killer cell mediated immunity (GO:0002717)	1/18	0.405331	0.720112	-0.669749	0.604818	RASGRP1
negative regulation of cellular amide metabolic process (GO:0034249)	3/76	0.36782	0.713846	-0.603797	0.603895	CNOT2;RPL13A;TYMS
negative regulation of calcium-mediated signaling (GO:0050849)	1/19	0.422264	0.722391	-0.697883	0.601662	SLA2
regulation of fibroblast growth factor receptor signaling pathway (GO:0040036)	1/21	0.454701	0.731624	-0.757332	0.596865	FGFR2
cellular response to glucocorticoid stimulus (GO:0071385)	1/18	0.405331	0.720112	-0.657883	0.594103	ANXA1
negative regulation of intracellular protein transport (GO:0090317)	1/21	0.454701	0.731624	-0.750996	0.591871	MDFIC
receptor catabolic process (GO:0032801)	1/25	0.514222	0.75185	-0.888422	0.59089	AP2A2
positive regulation of cell differentiation (GO:0045597)	7/195	0.320055	0.713846	-0.516686	0.588641	HSP90AB1;CTNNA1;CTNNA2;IL6ST;ACVR2A;RUNX2;TGFBR2
positive regulation of protein kinase B signaling (GO:0051897)	5/128	0.300276	0.713846	-0.48833	0.587486	CD86;HPSE;ESR1;FGFR2;EGFR
regulation of transcription from RNA polymerase III promoter (GO:0006359)	1/23	0.48532	0.738489	-0.807901	0.58407	RPTOR
protein autoubiquitination (GO:0051865)	2/50	0.418168	0.722391	-0.669069	0.583342	RNF141;RNF220
negative regulation of protein metabolic process (GO:0051248)	2/44	0.357388	0.713846	-0.562287	0.578556	FLNA;EGFR
cartilage development (GO:0051216)	2/47	0.388111	0.718814	-0.610946	0.578238	CD44;RUNX2
regulation of DNA biosynthetic process (GO:2000278)	1/23	0.48532	0.738489	-0.796038	0.575494	FAM129B
microtubule polymerization (GO:0046785)	1/28	0.554566	0.766544	-0.975221	0.574961	TUBGCP4
regulation of protein kinase A signaling (GO:0010738)	1/20	0.438717	0.723206	-0.697078	0.574324	AKAP7
protein complex disassembly (GO:0043241)	2/47	0.388111	0.718814	-0.606061	0.573615	VAMP8;SNAP29
regulation of intrinsic apoptotic signaling pathway (GO:2001242)	2/48	0.398209	0.720112	-0.622936	0.573585	SGMS1;BID
detection of visible light (GO:0009584)	1/17	0.387902	0.718814	-0.605207	0.573133	GNAQ
positive regulation of transcription of Notch receptor target (GO:0007221)	1/18	0.405331	0.720112	-0.632657	0.571322	MAML3
glycogen catabolic process (GO:0005980)	1/19	0.422264	0.722391	-0.656028	0.565578	PYGB
mitotic G2 DNA damage checkpoint (GO:0007095)	1/18	0.405331	0.720112	-0.622551	0.562196	FOXN3
positive regulation of potassium ion transport (GO:0043268)	1/16	0.369963	0.713846	-0.559076	0.555919	FLNA
positive regulation of tyrosine phosphorylation of STAT protein (GO:0042531)	2/54	0.457037	0.732878	-0.70276	0.550255	FLT3;IL6ST
modulation of excitatory postsynaptic potential (GO:0098815)	1/26	0.52806	0.754644	-0.861416	0.550054	SHANK2
sensory perception of pain (GO:0019233)	1/25	0.514222	0.75185	-0.825007	0.548713	P2RX4
mRNA transport (GO:0051028)	4/105	0.349829	0.713846	-0.52234	0.548619	NUP214;NUP210;DHX38;SRSF5
myoblast differentiation (GO:0045445)	1/17	0.387902	0.718814	-0.577176	0.546587	MBNL1
protein transport (GO:0015031)	11/327	0.328515	0.713846	-0.490489	0.545999	TBC1D1;RABGAP1L;RABGAP1;PRKCB;RAB27A;TBC1D2B;MIA3;TBC1D17;SNX8;TBC1D22A;ARCN1
regulation of multicellular organismal development (GO:2000026)	2/44	0.357388	0.713846	-0.529906	0.545239	HPSE;FOXP1
cytoplasmic microtubule organization (GO:0031122)	2/49	0.40823	0.721993	-0.604991	0.542027	TUBGCP4;KPNB1
plasma membrane bounded cell projection morphogenesis (GO:0120039)	2/53	0.447458	0.731624	-0.671334	0.539868	DAB2IP;SRGAP2
telomere maintenance (GO:0000723)	2/52	0.437785	0.723206	-0.652022	0.538587	PRKDC;RPA2
regulation of blood vessel endothelial cell migration (GO:0043535)	2/51	0.428021	0.723206	-0.633733	0.537775	ATP5B;P2RX4
regulation of DNA damage response, signal transduction by p53 class mediator (GO:0043516)	1/26	0.52806	0.754644	-0.834389	0.532796	CD44
mRNA export from nucleus (GO:0006406)	4/106	0.356313	0.713846	-0.515309	0.531771	NUP214;NUP210;DHX38;SRSF5
fatty acid biosynthetic process (GO:0006633)	2/48	0.398209	0.720112	-0.574635	0.529111	ACOT7;LIPC
positive regulation of Rho protein signal transduction (GO:0035025)	1/26	0.52806	0.754644	-0.827701	0.528525	AKAP13
glial cell differentiation (GO:0010001)	1/26	0.52806	0.754644	-0.827645	0.528489	ADGRG6
negative regulation of G1/S transition of mitotic cell cycle (GO:2000134)	1/25	0.514222	0.75185	-0.793573	0.527806	PRKDC
regulation of AMPA receptor activity (GO:2000311)	1/25	0.514222	0.75185	-0.792867	0.527336	SHANK2
positive regulation of cell cycle process (GO:0090068)	4/108	0.369277	0.713846	-0.528517	0.526514	DMRT1;DAB2IP;PKN2;RHOA
C-terminal protein lipidation (GO:0006501)	3/76	0.36782	0.713846	-0.52366	0.523744	BST1;NTM;ATG4B
serine family amino acid metabolic process (GO:0009069)	1/18	0.405331	0.720112	-0.577976	0.521942	GCLC
acylglycerol homeostasis (GO:0055090)	1/23	0.48532	0.738489	-0.714363	0.516447	LIPC
RNA splicing, via transesterification reactions (GO:0000375)	1/26	0.52806	0.754644	-0.800466	0.511134	SCAF11
protein catabolic process (GO:0030163)	3/82	0.414095	0.722391	-0.575149	0.507086	DAB2IP;HTRA2;SOCS6
positive regulation of transferase activity (GO:0051347)	5/138	0.356434	0.713846	-0.49019	0.505683	HSP90AB1;FLT3;DCUN1D1;FGFR2;EGFR
positive regulation of purine nucleotide biosynthetic process (GO:1900373)	1/25	0.514222	0.75185	-0.757379	0.503733	PID1
regulation of interferon-gamma production (GO:0032649)	2/44	0.357388	0.713846	-0.486526	0.500603	PDE4D;PDE4B
cellular response to organic substance (GO:0071310)	5/134	0.333859	0.713846	-0.454523	0.498629	SOCS2;PID1;FLT3;HTRA2;MAPK4
macromolecule modification (GO:0043412)	1/25	0.514222	0.75185	-0.747689	0.497288	ST3GAL6
positive regulation of actin filament polymerization (GO:0030838)	2/52	0.437785	0.723206	-0.601373	0.49675	BAIAP2L1;CDC42EP4
RNA methylation (GO:0001510)	2/50	0.418168	0.722391	-0.569496	0.496527	NSUN2;TRMT13
mesenchyme development (GO:0060485)	1/17	0.387902	0.718814	-0.524279	0.496494	FGFR2
B cell proliferation (GO:0042100)	1/30	0.579585	0.774712	-0.909968	0.496335	CR2
monocarboxylic acid catabolic process (GO:0072329)	1/26	0.52806	0.754644	-0.776822	0.496037	ACBD5
negative regulation of cell-matrix adhesion (GO:0001953)	1/28	0.554566	0.766544	-0.831866	0.490444	RASA1
positive regulation of binding (GO:0051099)	3/82	0.414095	0.722391	-0.554024	0.488461	GPSM1;STK4;STK3
regulation of steroid biosynthetic process (GO:0050810)	2/45	0.367696	0.713846	-0.484024	0.484266	SREBF1;KPNB1
positive regulation of leukocyte mediated cytotoxicity (GO:0001912)	1/26	0.52806	0.754644	-0.757881	0.483942	RASGRP1
positive regulation of transcription from RNA polymerase II promoter involved in cellular response to chemical stimulus (GO:1901522)	1/22	0.470231	0.736476	-0.640818	0.483517	RUNX2
organelle fission (GO:0048285)	1/29	0.567256	0.766544	-0.852173	0.483135	PEX11G
regulation of supramolecular fiber organization (GO:1902903)	1/27	0.541504	0.761015	-0.787589	0.483112	AKAP13
viral entry into host cell (GO:0046718)	1/18	0.405331	0.720112	-0.533642	0.481907	VAMP8
regulation of lipid biosynthetic process (GO:0046890)	1/29	0.567256	0.766544	-0.848513	0.48106	PRKAG2
ephrin receptor signaling pathway (GO:0048013)	3/83	0.421711	0.722391	-0.551993	0.476611	RASA1;AP2A2;RHOA
regulation of lamellipodium organization (GO:1902743)	1/18	0.405331	0.720112	-0.525736	0.474767	CD44
positive regulation of cell cycle G1/S phase transition (GO:1902808)	1/24	0.499979	0.746796	-0.684719	0.47464	RPTOR
regulation of NIK/NF-kappaB signaling (GO:1901222)	1/29	0.567256	0.766544	-0.835356	0.4736	EGFR
positive regulation of cellular component organization (GO:0051130)	4/107	0.362796	0.713846	-0.466597	0.473089	SUMO1;ABCB4;DAB2IP;SPIDR
negative regulation of oxidative stress-induced intrinsic apoptotic signaling pathway (GO:1902176)	1/19	0.422264	0.722391	-0.547581	0.472083	HTRA2
dendritic spine organization (GO:0097061)	1/25	0.514222	0.75185	-0.709253	0.471725	SHANK2
protein exit from endoplasmic reticulum (GO:0032527)	1/20	0.438717	0.723206	-0.572309	0.471526	OS9
ERAD pathway (GO:0036503)	3/78	0.38334	0.718814	-0.491202	0.470981	BRSK2;OS9;TMEM67
protein targeting (GO:0006605)	5/134	0.333859	0.713846	-0.428015	0.469548	VTI1A;ATG4B;LONP2;TRAK1;SEC63
protein localization to Golgi apparatus (GO:0034067)	1/24	0.499979	0.746796	-0.676086	0.468655	RIPOR1
positive regulation of dephosphorylation (GO:0035306)	1/25	0.514222	0.75185	-0.700369	0.465816	PPP2R5A
negative regulation of cellular response to growth factor stimulus (GO:0090288)	2/56	0.475902	0.738489	-0.623706	0.463129	DAB2IP;FAM129B
regulation of centrosome duplication (GO:0010824)	1/26	0.52806	0.754644	-0.71965	0.45953	TMEM67
neural crest cell migration (GO:0001755)	1/29	0.567256	0.766544	-0.810444	0.459477	SEMA4D
regulation of T cell migration (GO:2000404)	1/18	0.405331	0.720112	-0.508386	0.459099	RHOA
glycolytic process (GO:0006096)	1/24	0.499979	0.746796	-0.6622	0.45903	HK1
regulation of developmental growth (GO:0048638)	1/31	0.591564	0.778391	-0.872482	0.45804	FGFR2
regulation of cell communication (GO:0010646)	3/72	0.336603	0.713846	-0.420037	0.457358	SOCS2;PXK;ANXA1
RNA-dependent DNA biosynthetic process (GO:0006278)	1/22	0.470231	0.736476	-0.605577	0.456927	HSP90AB1
ammonium transport (GO:0015696)	1/24	0.499979	0.746796	-0.656635	0.455172	SLC18A2
activin receptor signaling pathway (GO:0032924)	1/20	0.438717	0.723206	-0.551565	0.454436	ACVR2A
regulation of transcription regulatory region DNA binding (GO:2000677)	1/27	0.541504	0.761015	-0.739157	0.453403	FAM129B
establishment of spindle orientation (GO:0051294)	1/22	0.470231	0.736476	-0.597758	0.451027	MAP4
transition metal ion transport (GO:0000041)	1/28	0.554566	0.766544	-0.764177	0.450536	TRPC5
protein localization to chromatin (GO:0071168)	1/17	0.387902	0.718814	-0.475209	0.450025	ESR1
mRNA-containing ribonucleoprotein complex export from nucleus (GO:0071427)	4/101	0.323925	0.713846	-0.399029	0.449803	NUP214;NUP210;DHX38;SRSF5
production of miRNAs involved in gene silencing by miRNA (GO:0035196)	1/29	0.567256	0.766544	-0.793013	0.449595	ZCCHC11
DNA-templated transcription, termination (GO:0006353)	4/107	0.362796	0.713846	-0.438491	0.444593	DMTF1;SSU72;DHX38;SRSF5
response to alcohol (GO:0097305)	1/26	0.52806	0.754644	-0.695658	0.44421	TGFBR2
autophagy of nucleus (GO:0044804)	1/21	0.454701	0.731624	-0.563395	0.44402	ATG4B
regulation of G1/S transition of mitotic cell cycle (GO:2000045)	2/47	0.388111	0.718814	-0.468352	0.443278	RPTOR;PID1
triglyceride homeostasis (GO:0070328)	1/29	0.567256	0.766544	-0.781794	0.443234	LIPC
positive regulation of T cell activation (GO:0050870)	3/69	0.313128	0.713846	-0.380676	0.44202	CD86;ANXA1;IL6ST
substrate adhesion-dependent cell spreading (GO:0034446)	1/33	0.614509	0.784466	-0.905674	0.441001	SRGAP2
regulation of establishment or maintenance of cell polarity (GO:0032878)	1/18	0.405331	0.720112	-0.484262	0.437313	ARFGEF1
regulation of protein oligomerization (GO:0032459)	1/24	0.499979	0.746796	-0.630101	0.436779	BID
DNA conformation change (GO:0071103)	1/19	0.422264	0.722391	-0.506424	0.4366	HAT1
MyD88-independent toll-like receptor signaling pathway (GO:0002756)	1/31	0.591564	0.778391	-0.830731	0.436121	IKBKE
regulation of mitotic cell cycle (GO:0007346)	6/166	0.33457	0.713846	-0.397371	0.435086	MAP3K1;SPHK1;PKN2;STK4;TTC28;STK3
antigen processing and presentation of peptide antigen via MHC class I (GO:0002474)	1/29	0.567256	0.766544	-0.765299	0.433882	SEC24D
GTP metabolic process (GO:0046039)	1/22	0.470231	0.736476	-0.57489	0.433772	NFS1
negative regulation of osteoblast differentiation (GO:0045668)	1/28	0.554566	0.766544	-0.733837	0.432648	SEMA4D
positive regulation of nuclear division (GO:0051785)	1/26	0.52806	0.754644	-0.675717	0.431477	DMRT1
regulation of lipoprotein lipase activity (GO:0051004)	1/21	0.454701	0.731624	-0.545564	0.429967	LIPC
negative regulation of lymphocyte proliferation (GO:0050672)	1/30	0.579585	0.774712	-0.787054	0.429293	CD86
regulation of calcium ion transmembrane transport (GO:1903169)	1/21	0.454701	0.731624	-0.544436	0.429078	UBASH3B
response to ketone (GO:1901654)	1/27	0.541504	0.761015	-0.698713	0.428594	ABCB4
positive regulation of cellular response to transforming growth factor beta stimulus (GO:1903846)	1/20	0.438717	0.723206	-0.520137	0.428542	HSP90AB1
cellular response to DNA damage stimulus (GO:0006974)	11/330	0.339178	0.713846	-0.395891	0.42805	RPAIN;SUMO1;CCND1;PRKDC;UBR5;POLI;HTRA2;MCM10;BID;IKBKE;SPIDR
positive regulation of phospholipid metabolic process (GO:1903727)	1/29	0.567256	0.766544	-0.750816	0.425671	FLT3
myeloid leukocyte differentiation (GO:0002573)	2/51	0.428021	0.723206	-0.500913	0.425066	FOXP1;TGFBR2
bile acid biosynthetic process (GO:0006699)	1/27	0.541504	0.761015	-0.692501	0.424784	SCP2
purine ribonucleotide biosynthetic process (GO:0009152)	3/76	0.36782	0.713846	-0.42444	0.424508	ATP5B;ACOT7;PRKAG2
positive regulation of cation transmembrane transport (GO:1904064)	1/18	0.405331	0.720112	-0.469817	0.424269	FLNA
regulation of neutrophil chemotaxis (GO:0090022)	1/30	0.579585	0.774712	-0.775652	0.423074	BST1
positive regulation of cartilage development (GO:0061036)	1/18	0.405331	0.720112	-0.468325	0.422921	TAPT1
negative regulation of cytoskeleton organization (GO:0051494)	1/25	0.514222	0.75185	-0.634843	0.422234	ARFGEF1
organophosphate ester transport (GO:0015748)	1/26	0.52806	0.754644	-0.658955	0.420774	SCP2
nucleotide-excision repair, DNA gap filling (GO:0006297)	1/24	0.499979	0.746796	-0.603133	0.418085	RPA2
establishment of protein localization to vacuole (GO:0072666)	1/22	0.470231	0.736476	-0.553037	0.417284	VTI1A
positive regulation of response to stimulus (GO:0048584)	2/55	0.466519	0.736476	-0.546954	0.417029	NSMCE1;EGFR
inner ear morphogenesis (GO:0042472)	1/23	0.48532	0.738489	-0.575805	0.416277	FGFR2
ERBB signaling pathway (GO:0038127)	3/81	0.406448	0.721008	-0.46221	0.416127	PIGR;DGKD;EGFR
adenylate cyclase-activating adrenergic receptor signaling pathway (GO:0071880)	1/21	0.454701	0.731624	-0.525243	0.413952	PDE4D
lytic vacuole organization (GO:0080171)	1/29	0.567256	0.766544	-0.729089	0.413353	GNPTAB
protein import into nucleus, translocation (GO:0000060)	1/26	0.52806	0.754644	-0.646925	0.413091	KPNB1
protein localization to cilium (GO:0061512)	1/23	0.48532	0.738489	-0.57073	0.412608	BBS4
heterotypic cell-cell adhesion (GO:0034113)	1/26	0.52806	0.754644	-0.64573	0.412328	ITGAD
superoxide metabolic process (GO:0006801)	1/30	0.579585	0.774712	-0.755685	0.412182	DUOX1
negative regulation of protein polymerization (GO:0032272)	1/23	0.48532	0.738489	-0.56857	0.411046	ARFGEF1
cellular lipid catabolic process (GO:0044242)	1/25	0.514222	0.75185	-0.611681	0.40683	ACBD5
negative regulation of nervous system development (GO:0051961)	1/23	0.48532	0.738489	-0.561756	0.40612	SLIT1
protein depolymerization (GO:0051261)	1/26	0.52806	0.754644	-0.6329	0.404136	KIF2A
aminoglycan biosynthetic process (GO:0006023)	2/47	0.388111	0.718814	-0.426414	0.403585	HEXA;HS2ST1
post-Golgi vesicle-mediated transport (GO:0006892)	2/59	0.503437	0.749584	-0.58757	0.403247	VAMP8;VTI1A
cobalamin metabolic process (GO:0009235)	1/22	0.470231	0.736476	-0.533292	0.402385	CUBN
negative regulation of double-strand break repair (GO:2000780)	1/20	0.438717	0.723206	-0.48815	0.402187	UBR5
calcium ion transport (GO:0006816)	4/119	0.439931	0.724701	-0.483984	0.397417	TRPC5;P2RX4;CDH23;CACNA1E
regulation of MAPK cascade (GO:0043408)	7/204	0.36156	0.713846	-0.390359	0.397123	FLT3;ULK4;DAB2IP;VRK2;RASGRP1;FGFR2;EGFR
positive regulation of nervous system development (GO:0051962)	2/53	0.447458	0.731624	-0.492947	0.396414	TENM4;DAB2IP
regulation of cell adhesion mediated by integrin (GO:0033628)	1/31	0.591564	0.778391	-0.751032	0.394281	DPP4
embryonic digestive tract development (GO:0048566)	1/21	0.454701	0.731624	-0.50017	0.394192	FGFR2
viral genome replication (GO:0019079)	1/23	0.48532	0.738489	-0.542022	0.391853	PI4KA
negative regulation of catalytic activity (GO:0043086)	1/27	0.541504	0.761015	-0.633752	0.388747	TMBIM1
tetrapyrrole metabolic process (GO:0033013)	1/22	0.470231	0.736476	-0.514555	0.388248	CUBN
regulation of mRNA processing (GO:0050684)	1/29	0.567256	0.766544	-0.678394	0.384612	SON
peptidyl-tyrosine autophosphorylation (GO:0038083)	2/46	0.377938	0.718814	-0.395078	0.38442	SLA2;EGFR
positive regulation of protein transport (GO:0051222)	2/57	0.485184	0.738489	-0.528222	0.382025	RIPOR1;MYH10
regulation of B cell receptor signaling pathway (GO:0050855)	1/18	0.405331	0.720112	-0.422296	0.381355	PRKCB
regulation of dendrite extension (GO:1903859)	1/19	0.422264	0.722391	-0.441655	0.380761	CPNE5
establishment of epithelial cell polarity (GO:0090162)	1/19	0.422264	0.722391	-0.441243	0.380406	RHOA
regulation of axon extension involved in axon guidance (GO:0048841)	1/24	0.499979	0.746796	-0.547787	0.37972	SEMA4D
negative regulation of JNK cascade (GO:0046329)	1/29	0.567256	0.766544	-0.665909	0.377534	NCOR1
protein homotrimerization (GO:0070207)	1/23	0.48532	0.738489	-0.522037	0.377406	HTRA2
negative regulation of T cell activation (GO:0050868)	1/35	0.636167	0.789008	-0.833365	0.376925	CD86
regulation of protein serine/threonine kinase activity (GO:0071900)	3/81	0.406448	0.721008	-0.415235	0.373836	RPTOR;DAB2IP;RHOA
I-kappaB kinase/NF-kappaB signaling (GO:0007249)	2/58	0.494363	0.746796	-0.528261	0.372152	DAB2IP;RBCK1
positive regulation of sprouting angiogenesis (GO:1903672)	1/29	0.567256	0.766544	-0.651162	0.369173	ANXA1
positive regulation of proteasomal protein catabolic process (GO:1901800)	3/74	0.352234	0.713846	-0.351337	0.366606	SUMO1;DAB2IP;RCHY1
coenzyme biosynthetic process (GO:0009108)	1/30	0.579585	0.774712	-0.671965	0.366518	ACOT7
positive regulation of peptidyl-tyrosine phosphorylation (GO:0050731)	4/117	0.427217	0.723206	-0.430798	0.366377	SEMA4D;FLT3;IL6ST;CD44
positive regulation of carbohydrate metabolic process (GO:0045913)	1/19	0.422264	0.722391	-0.419549	0.361703	PFKFB3
axon extension (GO:0048675)	1/21	0.454701	0.731624	-0.456206	0.359543	SLIT1
telomere capping (GO:0016233)	1/20	0.438717	0.723206	-0.430669	0.354829	PRKDC
Arp2/3 complex-mediated actin nucleation (GO:0034314)	1/21	0.454701	0.731624	-0.450145	0.354766	IQGAP2
cellular response to catecholamine stimulus (GO:0071870)	1/24	0.499979	0.746796	-0.511084	0.354278	PDE4B
mesonephric tubule development (GO:0072164)	1/18	0.405331	0.720112	-0.391363	0.353421	FGFR2
protein localization to lysosome (GO:0061462)	1/31	0.591564	0.778391	-0.670783	0.352151	AP3M1
regulation of neuron differentiation (GO:0045664)	3/85	0.436839	0.723206	-0.42471	0.351741	CASZ1;ULK4;RHOA
monocarboxylic acid transport (GO:0015718)	2/54	0.457037	0.732878	-0.449063	0.351612	SLC10A1;SLCO2B1
regulation of transcription from RNA polymerase II promoter (GO:0006357)	46/1479	0.28393	0.713846	-0.279069	0.351356	CSRNP2;PID1;NFIX;THRB;PLAG1;ZC3H4;PRKDC;GFI1;IKZF1;SLA2;NR2C2;TRAK1;RPAP2;MED12L;EGFR;DCAF1;ZMYM1;SUMO1;CUX1;CCND1;NRIP1;ORC2;CIC;SREBF1;POU2F1;SEMA4D;DMRT1;PRKCB;ESRRB;DAB2IP;SSU72;ARID5B;ARID1A;ESR1;ACVR2A;RUNX2;FOXP1;AHI1;NR6A1;NCOR1;DMTF1;CNOT2;DNAJA3;MAML3;MXD1;FGFR2
negative regulation of response to DNA damage stimulus (GO:2001021)	1/29	0.567256	0.766544	-0.615655	0.349042	CD44
regulation of natural killer cell mediated cytotoxicity (GO:0042269)	1/23	0.48532	0.738489	-0.482651	0.348931	RASGRP1
regulation of cellular response to growth factor stimulus (GO:0090287)	1/19	0.422264	0.722391	-0.403879	0.348193	FGFR2
lysosome organization (GO:0007040)	1/32	0.603202	0.780518	-0.68842	0.347998	GNPTAB
embryonic organ development (GO:0048568)	2/54	0.457037	0.732878	-0.444271	0.34786	FGFR2;TGFBR2
regulation of heterotypic cell-cell adhesion (GO:0034114)	1/20	0.438717	0.723206	-0.417798	0.344225	CD44
negative regulation of neuron projection development (GO:0010977)	2/52	0.437785	0.723206	-0.416127	0.343732	GFI1;RHOA
endodermal cell differentiation (GO:0035987)	1/33	0.614509	0.784466	-0.697959	0.339858	LAMB3
positive regulation of leukocyte cell-cell adhesion (GO:1903039)	1/22	0.470231	0.736476	-0.450036	0.339566	CD44
long-chain fatty acid metabolic process (GO:0001676)	2/56	0.475902	0.738489	-0.455718	0.33839	CPT1A;SCP2
posttranscriptional regulation of gene expression (GO:0010608)	2/45	0.367696	0.713846	-0.334831	0.334998	RBM3;GEMIN5
microtubule polymerization or depolymerization (GO:0031109)	1/24	0.499979	0.746796	-0.483175	0.334931	KIF2A
regulation of cell-cell adhesion (GO:0022407)	1/33	0.614509	0.784466	-0.686361	0.334211	DPP4
positive regulation of protein ubiquitination (GO:0031398)	3/84	0.429293	0.723206	-0.394969	0.333992	SPHK1;DCUN1D1;RCHY1
negative regulation of synaptic transmission (GO:0050805)	1/28	0.554566	0.766544	-0.563516	0.332232	SHANK2
TOR signaling (GO:0031929)	1/24	0.499979	0.746796	-0.478102	0.331415	RPTOR
multivesicular body organization (GO:0036257)	1/32	0.603202	0.780518	-0.65179	0.329482	RAB27A
negative regulation of DNA biosynthetic process (GO:2000279)	1/31	0.591564	0.778391	-0.626966	0.329148	FAM129B
regulation of ARF protein signal transduction (GO:0032012)	1/31	0.591564	0.778391	-0.625644	0.328454	APLP2
regulation of cellular component organization (GO:0051128)	5/141	0.373406	0.718814	-0.333402	0.32843	SOCS2;RPTOR;ZMYM1;SEMA4D;DAB2IP
RNA modification (GO:0009451)	2/55	0.466519	0.736476	-0.425709	0.324585	NSUN2;CDKAL1
canonical glycolysis (GO:0061621)	1/26	0.52806	0.754644	-0.508183	0.324498	HK1
divalent metal ion transport (GO:0070838)	3/89	0.466626	0.736476	-0.423274	0.32263	TRPC5;CDH23;CACNA1E
cortical cytoskeleton organization (GO:0030865)	1/30	0.579585	0.774712	-0.590185	0.321912	RHOBTB3
regulation of neurogenesis (GO:0050767)	2/58	0.494363	0.746796	-0.456776	0.321792	CASZ1;ULK4
chondrocyte differentiation (GO:0002062)	1/29	0.567256	0.766544	-0.567453	0.321715	RUNX2
neuron development (GO:0048666)	5/145	0.396028	0.720112	-0.34637	0.320833	SAMD14;TENM4;RASGRF1;MAP4;FRYL
positive regulation of Notch signaling pathway (GO:0045747)	1/34	0.625495	0.785111	-0.681151	0.319605	MAML3
regulation of cholesterol transport (GO:0032374)	1/21	0.454701	0.731624	-0.404829	0.319052	ABCB4
maturation of LSU-rRNA (GO:0000470)	1/23	0.48532	0.738489	-0.440678	0.318587	BOP1
regulation of mitochondrial membrane potential (GO:0051881)	1/36	0.646537	0.79475	-0.723773	0.315656	PID1
cation transport (GO:0006812)	3/80	0.398771	0.720112	-0.343262	0.315584	SLC22A14;P2RX5;P2RX4
regulation of cellular ketone metabolic process (GO:0010565)	2/62	0.53002	0.754644	-0.495586	0.314618	PSMD6;PRKAG2
carboxylic acid metabolic process (GO:0019752)	1/34	0.625495	0.785111	-0.668745	0.313783	GNE
positive regulation of Wnt signaling pathway (GO:0030177)	5/141	0.373406	0.718814	-0.317472	0.312738	PSMD6;DAAM2;UBR5;FGFR2;RNF220
ear morphogenesis (GO:0042471)	1/25	0.514222	0.75185	-0.469542	0.312293	FGFR2
positive regulation of tumor necrosis factor superfamily cytokine production (GO:1903557)	1/33	0.614509	0.784466	-0.638687	0.310997	RASGRP1
negative regulation of extrinsic apoptotic signaling pathway via death domain receptors (GO:1902042)	1/32	0.603202	0.780518	-0.608658	0.307679	TMBIM1
regulation of establishment of planar polarity (GO:0090175)	3/90	0.473965	0.738489	-0.411024	0.306879	PSMD6;AP2A2;RHOA
mRNA polyadenylation (GO:0006378)	1/28	0.554566	0.766544	-0.519942	0.306542	SSU72
protein modification process (GO:0036211)	3/85	0.436839	0.723206	-0.367413	0.304288	PRKDC;ST3GAL6;FBXL2
cellular amino acid biosynthetic process (GO:0008652)	1/29	0.567256	0.766544	-0.536449	0.304137	BCAT1
regulation of vasoconstriction (GO:0019229)	1/30	0.579585	0.774712	-0.555627	0.303062	ECE1
neuromuscular junction development (GO:0007528)	1/21	0.454701	0.731624	-0.382763	0.301661	DNAJA3
cofactor biosynthetic process (GO:0051188)	1/32	0.603202	0.780518	-0.595561	0.301058	NFS1
hepaticobiliary system development (GO:0061008)	1/22	0.470231	0.736476	-0.398794	0.300902	ARID5B
regulation of cellular protein metabolic process (GO:0032268)	2/51	0.428021	0.723206	-0.353841	0.300264	RBM3;GEMIN5
negative regulation of endothelial cell migration (GO:0010596)	1/35	0.636167	0.789008	-0.663011	0.299876	DAB2IP
regulation of phosphorylation (GO:0042325)	4/120	0.446257	0.731624	-0.370626	0.299043	NUP214;NUP210;PRKAG2;EGFR
circulatory system development (GO:0072359)	4/110	0.382224	0.718814	-0.307668	0.2959	AKAP13;RBM20;ECE1;TGFBR2
positive regulation of TOR signaling (GO:0032008)	1/33	0.614509	0.784466	-0.60684	0.29549	RPTOR
positive regulation of apoptotic signaling pathway (GO:2001235)	3/77	0.37559	0.718814	-0.299926	0.293705	DAB2IP;HTRA2;BID
transcription initiation from RNA polymerase I promoter (GO:0006361)	1/34	0.625495	0.785111	-0.618463	0.290191	DMTF1
regulation of defense response to virus by host (GO:0050691)	1/31	0.591564	0.778391	-0.552695	0.290156	RNF216
transcription from RNA polymerase I promoter (GO:0006360)	1/34	0.625495	0.785111	-0.610877	0.286631	DMTF1
positive regulation of intrinsic apoptotic signaling pathway (GO:2001244)	1/34	0.625495	0.785111	-0.610431	0.286422	BID
fat-soluble vitamin metabolic process (GO:0006775)	1/27	0.541504	0.761015	-0.466628	0.286232	CUBN
cAMP-mediated signaling (GO:0019933)	3/76	0.36782	0.713846	-0.286017	0.286063	PDE4D;GNAQ;ADGRG6
glutamate metabolic process (GO:0006536)	1/22	0.470231	0.736476	-0.378727	0.285761	GCLC
positive regulation of lipid kinase activity (GO:0090218)	1/28	0.554566	0.766544	-0.47459	0.279804	FLT3
response to growth factor (GO:0070848)	1/27	0.541504	0.761015	-0.456127	0.279791	HTRA2
nucleotide-excision repair, preincision complex assembly (GO:0006294)	1/30	0.579585	0.774712	-0.511935	0.279231	RPA2
positive regulation of epithelial cell differentiation (GO:0030858)	1/20	0.438717	0.723206	-0.338501	0.278892	AHI1
nucleic acid-templated transcription (GO:0097659)	3/77	0.37559	0.718814	-0.283333	0.277456	THRB;POLR2I;ESR1
regulation of mitotic nuclear division (GO:0007088)	3/85	0.436839	0.723206	-0.334958	0.27741	TOM1L2;DMRT1;CEP85
regulation of cell death (GO:0010941)	3/97	0.523952	0.754644	-0.425228	0.274848	DUS2;SAP30BP;HTRA2
positive regulation of transcription regulatory region DNA binding (GO:2000679)	1/20	0.438717	0.723206	-0.333042	0.274394	FAM129B
7-methylguanosine RNA capping (GO:0009452)	1/33	0.614509	0.784466	-0.563473	0.274372	POLR2I
vacuolar transport (GO:0007034)	1/30	0.579585	0.774712	-0.500406	0.272943	VTI1A
positive regulation of myeloid cell differentiation (GO:0045639)	1/30	0.579585	0.774712	-0.497259	0.271226	ACVR2A
ribosomal large subunit biogenesis (GO:0042273)	2/64	0.547196	0.764451	-0.443064	0.267144	BOP1;RPL3
endoplasmic reticulum organization (GO:0007029)	1/35	0.636167	0.789008	-0.589919	0.266817	TRAM2
3'-phosphoadenosine 5'-phosphosulfate metabolic process (GO:0050427)	1/26	0.52806	0.754644	-0.41711	0.266344	SULT6B1
endosome organization (GO:0007032)	1/37	0.656611	0.797555	-0.632175	0.265933	RAB27A
negative regulation of axonogenesis (GO:0050771)	1/24	0.499979	0.746796	-0.383102	0.265562	RHOA
melanosome organization (GO:0032438)	1/24	0.499979	0.746796	-0.383005	0.265495	PMEL
chordate embryonic development (GO:0043009)	2/57	0.485184	0.738489	-0.364054	0.263294	MBNL1;FGFR2
exonucleolytic nuclear-transcribed mRNA catabolic process involved in deadenylation-dependent decay (GO:0043928)	1/34	0.625495	0.785111	-0.556989	0.261346	EXOSC8
regulation of potassium ion transmembrane transport (GO:1901379)	1/33	0.614509	0.784466	-0.533777	0.259913	FLNA
response to glucocorticoid (GO:0051384)	1/25	0.514222	0.75185	-0.388677	0.258509	ANXA1
lipid catabolic process (GO:0016042)	1/22	0.470231	0.736476	-0.341249	0.257483	LIPH
establishment or maintenance of epithelial cell apical/basal polarity (GO:0045197)	1/34	0.625495	0.785111	-0.546282	0.256322	RHOA
negative regulation of canonical Wnt signaling pathway (GO:0090090)	5/149	0.418574	0.722391	-0.293609	0.255704	PSMD6;DAB2IP;FUZ;STK4;STK3
regulation of voltage-gated calcium channel activity (GO:1901385)	1/26	0.52806	0.754644	-0.398223	0.254284	PDE4B
regulation of transforming growth factor beta receptor signaling pathway (GO:0017015)	3/80	0.398771	0.720112	-0.276214	0.253943	HSP90AB1;LDLRAD4;TGFBR2
positive regulation of DNA binding (GO:0043388)	1/35	0.636167	0.789008	-0.561355	0.253897	FAM129B
organonitrogen compound catabolic process (GO:1901565)	2/57	0.485184	0.738489	-0.349301	0.252624	LIPC;GGACT
alpha-amino acid metabolic process (GO:1901605)	1/32	0.603202	0.780518	-0.497422	0.251448	KMO
positive regulation of protein oligomerization (GO:0032461)	1/24	0.499979	0.746796	-0.361749	0.25076	BID
tRNA processing (GO:0008033)	2/63	0.538663	0.761015	-0.405088	0.250614	NSUN2;CDKAL1
microtubule bundle formation (GO:0001578)	1/33	0.614509	0.784466	-0.514575	0.250563	KIF20A
lipid translocation (GO:0034204)	1/23	0.48532	0.738489	-0.345515	0.249789	ABCB4
keratan sulfate biosynthetic process (GO:0018146)	1/30	0.579585	0.774712	-0.456709	0.249108	ST3GAL6
regulation of synapse assembly (GO:0051963)	1/36	0.646537	0.79475	-0.568686	0.248018	SLIT1
positive regulation of phosphatidylinositol 3-kinase activity (GO:0043552)	1/26	0.52806	0.754644	-0.388324	0.247963	FLT3
apoptotic process (GO:0006915)	8/232	0.340735	0.713846	-0.228481	0.245994	PLAG1;IL2RA;MAGI3;STK4;BID;TGFBR2;ARHGEF6;STK3
ubiquitin-dependent protein catabolic process (GO:0006511)	11/342	0.382381	0.718814	-0.255871	0.245978	PSMD6;RNF216;CRBN;OS9;HECW2;UBR5;MVB12B;UBR4;RBCK1;RCHY1;BTRC
protein O-linked glycosylation (GO:0006493)	4/116	0.420833	0.722391	-0.281892	0.243983	GALNT7;MUC5B;TRAK1;XXYLT1
immune response-activating cell surface receptor signaling pathway (GO:0002429)	1/21	0.454701	0.731624	-0.308715	0.243303	SLA2
negative regulation of ion transmembrane transporter activity (GO:0032413)	1/22	0.470231	0.736476	-0.320742	0.24201	HECW2
mitotic G2/M transition checkpoint (GO:0044818)	1/24	0.499979	0.746796	-0.348854	0.241822	FOXN3
regulation of tumor necrosis factor production (GO:0032680)	2/62	0.53002	0.754644	-0.380689	0.241677	RASGRP1;FOXP1
negative regulation of protein complex assembly (GO:0031333)	1/36	0.646537	0.79475	-0.552841	0.241108	LDLRAD4
proteasomal protein catabolic process (GO:0010498)	8/238	0.366484	0.713846	-0.238619	0.239526	BRSK2;PSMD6;RNF216;CRBN;HECW2;RBCK1;SOCS6;BTRC
ubiquitin-dependent ERAD pathway (GO:0030433)	2/59	0.503437	0.749584	-0.3434	0.235674	OS9;TMEM67
organic cation transport (GO:0015695)	1/25	0.514222	0.75185	-0.354257	0.235616	SLC22A14
acylglycerol metabolic process (GO:0006639)	1/37	0.656611	0.797555	-0.558803	0.235068	DGKD
regulation of pathway-restricted SMAD protein phosphorylation (GO:0060393)	2/60	0.512406	0.75185	-0.348795	0.233218	LDLRAD4;ACVR2A
positive regulation of biomineral tissue development (GO:0070169)	1/34	0.625495	0.785111	-0.491833	0.230774	ACVR2A
cellular response to heat (GO:0034605)	2/48	0.398209	0.720112	-0.249451	0.229689	SUMO1;HTRA2
negative regulation of NF-kappaB transcription factor activity (GO:0032088)	3/83	0.421711	0.722391	-0.265109	0.228904	GFI1;DAB2IP;RBCK1
glucose catabolic process to pyruvate (GO:0061718)	1/26	0.52806	0.754644	-0.355858	0.227232	HK1
cellular response to drug (GO:0035690)	1/31	0.591564	0.778391	-0.430989	0.226263	PDE4B
positive regulation of interleukin-12 production (GO:0032735)	1/26	0.52806	0.754644	-0.353493	0.225721	LTB
ventricular cardiac muscle tissue morphogenesis (GO:0055010)	1/35	0.636167	0.789008	-0.493699	0.223297	FGFR2
actin-myosin filament sliding (GO:0033275)	1/39	0.675907	0.807248	-0.568591	0.222717	NEB
plasma membrane organization (GO:0007009)	1/37	0.656611	0.797555	-0.520435	0.218928	MYOF
regulation of dendritic spine development (GO:0060998)	1/32	0.603202	0.780518	-0.431541	0.218145	SHANK2
regulation of exocytosis (GO:0017157)	2/52	0.437785	0.723206	-0.260048	0.214806	ANXA1;RAB27A
endoderm formation (GO:0001706)	1/37	0.656611	0.797555	-0.507222	0.21337	LAMB3
regulation of ubiquitin-protein transferase activity (GO:0051438)	1/32	0.603202	0.780518	-0.413735	0.209144	DCUN1D1
protein trimerization (GO:0070206)	1/33	0.614509	0.784466	-0.424551	0.206727	HTRA2
cellular response to glucagon stimulus (GO:0071377)	1/33	0.614509	0.784466	-0.412827	0.201018	GNG3
negative regulation of G0 to G1 transition (GO:0070317)	1/38	0.666398	0.801175	-0.491704	0.199567	DAB2IP
positive regulation of JAK-STAT cascade (GO:0046427)	2/65	0.555618	0.766544	-0.338721	0.199057	FLT3;IL6ST
cardiac muscle tissue morphogenesis (GO:0055008)	1/37	0.656611	0.797555	-0.472975	0.198963	FGFR2
peptide catabolic process (GO:0043171)	1/26	0.52806	0.754644	-0.311443	0.19887	ECE1
glutamine family amino acid metabolic process (GO:0009064)	1/24	0.499979	0.746796	-0.28658	0.198654	GCLC
regulation of insulin secretion involved in cellular response to glucose stimulus (GO:0061178)	1/23	0.48532	0.738489	-0.27357	0.197777	BRSK2
regulation of calcium ion transmembrane transporter activity (GO:1901019)	1/28	0.554566	0.766544	-0.335425	0.197757	PDE4D
glycosaminoglycan biosynthetic process (GO:0006024)	3/100	0.544564	0.764402	-0.320268	0.19465	HEXA;ST3GAL6;HS2ST1
regulation of osteoclast differentiation (GO:0045670)	1/38	0.666398	0.801175	-0.47926	0.194516	UBASH3B
hematopoietic progenitor cell differentiation (GO:0002244)	1/23	0.48532	0.738489	-0.266186	0.192438	FLT3
regulation of JAK-STAT cascade (GO:0046425)	2/66	0.563928	0.766544	-0.333958	0.191301	SOCS2;SOCS6
positive regulation of JUN kinase activity (GO:0043507)	2/51	0.428021	0.723206	-0.224006	0.190088	MDFIC;DAB2IP
positive regulation of proteolysis involved in cellular protein catabolic process (GO:1903052)	1/23	0.48532	0.738489	-0.261694	0.189191	DAB2IP
regulation of T cell differentiation (GO:0045580)	1/34	0.625495	0.785111	-0.402992	0.189089	IL2RA
telomere maintenance via telomere lengthening (GO:0010833)	1/28	0.554566	0.766544	-0.3204	0.188898	HSP90AB1
intra-Golgi vesicle-mediated transport (GO:0006891)	1/34	0.625495	0.785111	-0.398558	0.187008	VTI1A
sterol biosynthetic process (GO:0016126)	1/41	0.694121	0.811175	-0.511545	0.186769	PRKAG2
cellular response to amino acid stimulus (GO:0071230)	1/33	0.614509	0.784466	-0.379028	0.184561	RPTOR
regulation of release of cytochrome c from mitochondria (GO:0090199)	1/41	0.694121	0.811175	-0.505156	0.184437	BID
cytoskeleton-dependent intracellular transport (GO:0030705)	1/27	0.541504	0.761015	-0.3	0.184022	KIF1B
regulation of JUN kinase activity (GO:0043506)	1/35	0.636167	0.789008	-0.402815	0.182191	DAB2IP
regulation of proteolysis (GO:0030162)	2/64	0.547196	0.764451	-0.299663	0.180681	TM4SF20;BTRC
regulation of substrate adhesion-dependent cell spreading (GO:1900024)	1/42	0.702841	0.814618	-0.51125	0.180279	FLNA
membrane depolarization during action potential (GO:0086010)	1/39	0.675907	0.807248	-0.454871	0.178173	CACNA1E
regulation of sodium ion transport (GO:0002028)	1/36	0.646537	0.79475	-0.405346	0.176782	P2RX4
apoptotic mitochondrial changes (GO:0008637)	1/35	0.636167	0.789008	-0.3908	0.176756	BID
regulation of nervous system development (GO:0051960)	1/26	0.52806	0.754644	-0.276169	0.176347	TENM4
granulocyte chemotaxis (GO:0071621)	2/57	0.485184	0.738489	-0.241474	0.174641	ANXA1;PDE4B
protein K48-linked ubiquitination (GO:0070936)	2/49	0.40823	0.721993	-0.193467	0.173332	RNF216;UBR5
cell-cell adhesion mediated by cadherin (GO:0044331)	1/24	0.499979	0.746796	-0.249644	0.173051	CDH8
axonemal dynein complex assembly (GO:0070286)	1/34	0.625495	0.785111	-0.368398	0.172857	DNAAF1
ERBB2 signaling pathway (GO:0038128)	1/40	0.685146	0.810062	-0.454408	0.171823	EGFR
negative regulation of multicellular organismal process (GO:0051241)	4/126	0.483705	0.738489	-0.233884	0.169865	DAB2IP;FUZ;LDLRAD4;EGFR
negative regulation of epithelial cell migration (GO:0010633)	1/36	0.646537	0.79475	-0.388375	0.16938	DAB2IP
regulation of actin cytoskeleton reorganization (GO:2000249)	1/31	0.591564	0.778391	-0.32171	0.168893	BAIAP2L1
organic anion transport (GO:0015711)	4/125	0.47753	0.738489	-0.228152	0.168634	SLC22A14;SCP2;SLCO2B1;SLC4A10
negative regulation of transforming growth factor beta receptor signaling pathway (GO:0030512)	2/56	0.475902	0.738489	-0.224621	0.166791	LDLRAD4;TGFBR2
entry into host cell (GO:0030260)	1/34	0.625495	0.785111	-0.355389	0.166753	VAMP8
positive regulation of cell development (GO:0010720)	1/35	0.636167	0.789008	-0.366231	0.165644	FAM129B
negative regulation of cellular response to transforming growth factor beta stimulus (GO:1903845)	2/54	0.457037	0.732878	-0.20755	0.16251	LDLRAD4;TGFBR2
snRNA processing (GO:0016180)	1/27	0.541504	0.761015	-0.262492	0.161014	INTS2
positive regulation of endocytosis (GO:0045807)	2/65	0.555618	0.766544	-0.272978	0.160422	RAB27A;DOCK2
regulation of tumor necrosis factor-mediated signaling pathway (GO:0010803)	2/57	0.485184	0.738489	-0.218708	0.158176	SPHK1;RBCK1
regulation of cyclin-dependent protein serine/threonine kinase activity (GO:0000079)	2/68	0.580211	0.774712	-0.289882	0.157801	CCND3;CCND1
regulation of G0 to G1 transition (GO:0070316)	1/40	0.685146	0.810062	-0.411889	0.155745	DAB2IP
synaptic transmission, glutamatergic (GO:0035249)	1/22	0.470231	0.736476	-0.206142	0.155541	CDH8
positive regulation of stress fiber assembly (GO:0051496)	1/38	0.666398	0.801175	-0.379537	0.154042	RHOA
detection of chemical stimulus involved in sensory perception of bitter taste (GO:0001580)	1/41	0.694121	0.811175	-0.418751	0.15289	PIGR
positive regulation of smooth muscle cell proliferation (GO:0048661)	1/38	0.666398	0.801175	-0.375694	0.152482	FOXP1
RNA polyadenylation (GO:0043631)	1/29	0.567256	0.766544	-0.267811	0.151834	SSU72
negative regulation of neurogenesis (GO:0050768)	1/34	0.625495	0.785111	-0.322449	0.151297	SRGAP2
positive regulation of receptor internalization (GO:0002092)	1/22	0.470231	0.736476	-0.199725	0.150699	AHI1
oligosaccharide biosynthetic process (GO:0009312)	1/34	0.625495	0.785111	-0.321	0.150617	GALNT7
extrinsic apoptotic signaling pathway (GO:0097191)	2/68	0.580211	0.774712	-0.275373	0.149903	DAB2IP;BID
misfolded or incompletely synthesized protein catabolic process (GO:0006515)	1/26	0.52806	0.754644	-0.232766	0.148632	LONP1
termination of RNA polymerase I transcription (GO:0006363)	1/32	0.603202	0.780518	-0.293898	0.148566	DMTF1
positive regulation of protein binding (GO:0032092)	2/61	0.521267	0.754644	-0.225307	0.146786	STK4;STK3
translational elongation (GO:0006414)	3/106	0.584181	0.778391	-0.272734	0.146607	EEF2K;MRPS25;ERAL1
platelet degranulation (GO:0002576)	4/125	0.47753	0.738489	-0.198319	0.146583	SELP;APLP2;PSAP;FLNA
regulation of sodium ion transmembrane transporter activity (GO:2000649)	1/38	0.666398	0.801175	-0.360796	0.146435	HECW2
ATP generation from ADP (GO:0006757)	1/25	0.514222	0.75185	-0.219286	0.145847	HK1
muscle filament sliding (GO:0030049)	1/39	0.675907	0.807248	-0.371171	0.145388	NEB
cellular protein modification process (GO:0006464)	31/1002	0.340222	0.713846	-0.134253	0.144746	BRSK2;PRKDC;DCUN1D1;MIA3;STK4;STK3;SOCS2;PSMD6;MKNK1;FNTB;ST3GAL6;SOCS6;BTRC;IKBKE;MAPK4;FN3K;MAP3K1;ANXA1;PRKCB;APLP2;PPP2R5A;VRK2;CLK3;TGFBR2;PTPRE;ASB6;ATG4B;PKN2;FBXL2;ASB3;MAP3K12
regulation of kinase activity (GO:0043549)	3/102	0.558012	0.766544	-0.247576	0.14443	FLT3;FGFR2;EGFR
negative regulation of cytokine secretion (GO:0050710)	1/41	0.694121	0.811175	-0.394321	0.14397	ANXA1
blood circulation (GO:0008015)	2/51	0.428021	0.723206	-0.168653	0.143116	GCLC;MYOF
positive regulation of kinase activity (GO:0033674)	4/114	0.408014	0.721993	-0.158968	0.142508	FLT3;PRKAG2;FGFR2;EGFR
tRNA aminoacylation (GO:0043039)	1/41	0.694121	0.811175	-0.388226	0.141744	QRSL1
regulation of protein insertion into mitochondrial membrane involved in apoptotic signaling pathway (GO:1900739)	1/31	0.591564	0.778391	-0.269825	0.141654	BID
regulation of release of sequestered calcium ion into cytosol (GO:0051279)	2/50	0.418168	0.722391	-0.15956	0.139116	UBASH3B;PDE4D
positive regulation of ubiquitin-protein transferase activity (GO:0051443)	1/32	0.603202	0.780518	-0.272347	0.137672	DCUN1D1
Golgi organization (GO:0007030)	4/122	0.458842	0.734771	-0.176208	0.137275	ARFGEF1;TBC1D20;VTI1A;DYM
negative regulation of ERK1 and ERK2 cascade (GO:0070373)	1/41	0.694121	0.811175	-0.375506	0.1371	DAB2IP
negative regulation of blood vessel morphogenesis (GO:2000181)	2/66	0.563928	0.766544	-0.238809	0.136797	DAB2IP;FAM129B
cognition (GO:0050890)	1/41	0.694121	0.811175	-0.374673	0.136796	BBS4
regulation of protein ubiquitination (GO:0031396)	3/102	0.558012	0.766544	-0.233911	0.136458	HSP90AB1;SPHK1;RCHY1
cilium movement (GO:0003341)	2/50	0.418168	0.722391	-0.156343	0.136311	DNAH17;DNAAF1
negative regulation of cell projection organization (GO:0031345)	1/42	0.702841	0.814618	-0.385039	0.135774	GFI1
regulation of cell cycle G1/S phase transition (GO:1902806)	1/25	0.514222	0.75185	-0.200422	0.133301	PID1
positive regulation of protein localization to plasma membrane (GO:1903078)	1/44	0.719544	0.823035	-0.403475	0.132799	EGFR
epithelial tube morphogenesis (GO:0060562)	1/35	0.636167	0.789008	-0.292831	0.132446	MTSS1
ATP metabolic process (GO:0046034)	2/57	0.485184	0.738489	-0.182669	0.132111	ATP5B;PRKAG2
phospholipid transport (GO:0015914)	2/59	0.503437	0.749584	-0.190951	0.131049	SCP2;ABCB4
phospholipid metabolic process (GO:0006644)	2/71	0.60379	0.780518	-0.258297	0.130318	GPX4;AGPAT3
regulation of fatty acid biosynthetic process (GO:0042304)	1/29	0.567256	0.766544	-0.227358	0.128899	PRKAG2
regulation of erythrocyte differentiation (GO:0045646)	1/33	0.614509	0.784466	-0.263694	0.128401	ACVR2A
fibroblast growth factor receptor signaling pathway (GO:0008543)	2/79	0.661723	0.801175	-0.307415	0.126934	POLR2I;FGFR2
positive regulation of lipid biosynthetic process (GO:0046889)	1/29	0.567256	0.766544	-0.223663	0.126805	SREBF1
nucleic acid phosphodiester bond hydrolysis (GO:0090305)	2/74	0.626354	0.785111	-0.265234	0.124087	XRN2;RPA2
protein acetylation (GO:0006473)	1/34	0.625495	0.785111	-0.262916	0.123364	HAT1
negative regulation of smooth muscle cell proliferation (GO:0048662)	1/28	0.554566	0.766544	-0.209092	0.123274	PRKG1
positive regulation of protein modification by small protein conjugation or removal (GO:1903322)	2/66	0.563928	0.766544	-0.214992	0.123154	SPHK1;RCHY1
positive regulation of transport (GO:0051050)	1/45	0.727541	0.82457	-0.385801	0.122718	ANXA1
maturation of SSU-rRNA (GO:0030490)	1/47	0.742857	0.834297	-0.410952	0.122156	PDCD11
T cell receptor signaling pathway (GO:0050852)	5/164	0.501332	0.747867	-0.174302	0.120353	PSMD6;PDE4D;PDE4B;RBCK1;BTRC
DNA synthesis involved in DNA repair (GO:0000731)	2/66	0.563928	0.766544	-0.207884	0.119082	POLI;RPA2
negative regulation of T cell proliferation (GO:0042130)	1/25	0.514222	0.75185	-0.178472	0.118702	CD86
mitochondrion disassembly (GO:0061726)	1/39	0.675907	0.807248	-0.299889	0.117466	ATG4B
regulation of rhodopsin mediated signaling pathway (GO:0022400)	1/27	0.541504	0.761015	-0.191482	0.117456	FNTB
positive regulation of leukocyte migration (GO:0002687)	1/35	0.636167	0.789008	-0.257955	0.116672	MIA3
mitochondrial translation (GO:0032543)	3/108	0.596889	0.780518	-0.225743	0.116489	MRPS25;ERAL1;QRSL1
interstrand cross-link repair (GO:0036297)	1/49	0.757315	0.840509	-0.415794	0.115581	RPA2
oligosaccharide metabolic process (GO:0009311)	2/64	0.547196	0.764451	-0.190108	0.114625	GALNT7;ST3GAL6
translation (GO:0006412)	7/233	0.495629	0.746796	-0.161787	0.113563	EEF2K;RPL3;RPS18;RPL13A;RPS11;RPL18;QRSL1
glycolytic process through glucose-6-phosphate (GO:0061620)	1/26	0.52806	0.754644	-0.177763	0.11351	HK1
regulation of glutamate receptor signaling pathway (GO:1900449)	1/33	0.614509	0.784466	-0.23088	0.112423	SHANK2
peptidyl-threonine phosphorylation (GO:0018107)	2/69	0.588184	0.778391	-0.211271	0.112125	TGFBR2;MAP3K12
positive regulation of phosphatase activity (GO:0010922)	1/23	0.48532	0.738489	-0.154342	0.111581	HSP90AB1
negative regulation of intrinsic apoptotic signaling pathway in response to DNA damage (GO:1902230)	1/25	0.514222	0.75185	-0.165591	0.110134	CD44
regulation of proteasomal protein catabolic process (GO:0061136)	1/40	0.685146	0.810062	-0.288873	0.10923	DAB2IP
regulation of centrosome cycle (GO:0046605)	1/27	0.541504	0.761015	-0.172665	0.105914	CEP85
response to unfolded protein (GO:0006986)	1/44	0.719544	0.823035	-0.317956	0.104651	HSP90AB1
regulation of blood circulation (GO:1903522)	1/37	0.656611	0.797555	-0.24563	0.103328	ECE1
positive regulation of cellular protein metabolic process (GO:0032270)	3/92	0.488502	0.742851	-0.142004	0.101733	RBM3;FAM129A;BTRC
mRNA catabolic process (GO:0006402)	1/37	0.656611	0.797555	-0.241591	0.101629	NBAS
vesicle fusion (GO:0006906)	3/95	0.509931	0.75185	-0.149594	0.100748	VAMP8;VTI1A;SNAP29
cellular response to radiation (GO:0071478)	1/43	0.711313	0.8208	-0.295689	0.100724	SPIDR
vesicle targeting, rough ER to cis-Golgi (GO:0048207)	2/64	0.547196	0.764451	-0.164662	0.0992829	TBC1D20;SEC24D
negative regulation of axon extension (GO:0030517)	1/24	0.499979	0.746796	-0.141673	0.0982063	SEMA4D
negative regulation of epithelial cell proliferation (GO:0050680)	2/67	0.572126	0.771145	-0.168243	0.0939462	DAB2IP;MTSS1
neurogenesis (GO:0022008)	1/51	0.77096	0.850369	-0.358015	0.0931263	TRAK1
positive regulation of secretion by cell (GO:1903532)	2/53	0.447458	0.731624	-0.114534	0.0921049	RAB27A;MYH10
organelle membrane fusion (GO:0090174)	2/72	0.611424	0.784466	-0.185215	0.0911192	VAMP8;SNAP29
anatomical structure homeostasis (GO:0060249)	1/36	0.646537	0.79475	-0.207916	0.0906775	RPA2
COPII vesicle coating (GO:0048208)	2/64	0.547196	0.764451	-0.150221	0.0905757	TBC1D20;SEC24D
protein N-linked glycosylation via asparagine (GO:0018279)	1/45	0.727541	0.82457	-0.283422	0.0901524	ST3GAL6
regulation of secretion by cell (GO:1903530)	2/57	0.485184	0.738489	-0.121386	0.0877899	VAMP8;ANXA1
cytosolic transport (GO:0016482)	3/119	0.66214	0.801175	-0.211992	0.0873996	RHOBTB3;VTI1A;TBC1D17
endocrine system development (GO:0035270)	1/27	0.541504	0.761015	-0.141196	0.0866104	THRB
regulation of cellular amine metabolic process (GO:0033238)	1/52	0.777493	0.851661	-0.343701	0.0865029	PSMD6
regulation of ryanodine-sensitive calcium-release channel activity (GO:0060314)	1/26	0.52806	0.754644	-0.134373	0.0858033	PDE4D
steroid biosynthetic process (GO:0006694)	2/80	0.668465	0.80284	-0.207378	0.083526	SCP2;PRKAG2
negative regulation of DNA binding (GO:0043392)	1/35	0.636167	0.789008	-0.183362	0.0829336	SUMO1
mitochondrial gene expression (GO:0140053)	1/46	0.73531	0.82973	-0.268646	0.082599	QRSL1
regulation of cardiac muscle cell action potential (GO:0098901)	1/25	0.514222	0.75185	-0.12383	0.0823593	FLNA
regulation of intracellular steroid hormone receptor signaling pathway (GO:0033143)	1/28	0.554566	0.766544	-0.139469	0.0822267	ESR1
membrane fusion (GO:0061025)	1/55	0.795997	0.864848	-0.354513	0.0808858	SNAP29
lipid modification (GO:0030258)	1/27	0.541504	0.761015	-0.131861	0.0808842	DGKD
determination of left/right symmetry (GO:0007368)	1/43	0.711313	0.8208	-0.237	0.0807324	DNAAF1
homophilic cell adhesion via plasma membrane adhesion molecules (GO:0007156)	2/65	0.555618	0.766544	-0.133345	0.0783633	KIRREL3;CDH8
regulation of synaptic transmission, glutamatergic (GO:0051966)	1/46	0.73531	0.82973	-0.254623	0.0782873	SHANK2
positive regulation of response to DNA damage stimulus (GO:2001022)	2/50	0.418168	0.722391	-0.088486	0.0771484	NSMCE1;EGFR
peptide cross-linking (GO:0018149)	1/48	0.75019	0.837736	-0.265306	0.0762565	ANXA1
positive regulation of cytokine-mediated signaling pathway (GO:0001961)	1/34	0.625495	0.785111	-0.162438	0.0762179	GFI1
response to cAMP (GO:0051591)	1/41	0.694121	0.811175	-0.207925	0.0759151	DUOX1
regulation of B cell proliferation (GO:0030888)	1/44	0.719544	0.823035	-0.229631	0.07558	BST1
unsaturated fatty acid metabolic process (GO:0033559)	1/45	0.727541	0.82457	-0.234537	0.0746028	SCP2
nuclear-transcribed mRNA catabolic process, exonucleolytic (GO:0000291)	1/36	0.646537	0.79475	-0.170666	0.0744318	EXOSC8
muscle cell differentiation (GO:0042692)	1/37	0.656611	0.797555	-0.176936	0.0744304	MBNL1
positive regulation of peptide secretion (GO:0002793)	1/36	0.646537	0.79475	-0.168666	0.0735596	MYH10
regulation of androgen receptor signaling pathway (GO:0060765)	1/24	0.499979	0.746796	-0.104277	0.0722839	FOXP1
positive regulation of mitotic nuclear division (GO:0045840)	1/41	0.694121	0.811175	-0.196783	0.0718472	DMRT1
TRIF-dependent toll-like receptor signaling pathway (GO:0035666)	1/30	0.579585	0.774712	-0.123717	0.0674806	IKBKE
positive regulation of cell-substrate adhesion (GO:0010811)	1/53	0.78384	0.85662	-0.274733	0.0669113	FLNA
negative regulation of neuron death (GO:1901215)	2/84	0.694352	0.811175	-0.182416	0.0665409	RASA1;HTRA2
positive regulation of cell-cell adhesion (GO:0022409)	1/34	0.625495	0.785111	-0.137918	0.064713	CD44
positive regulation of cellular component biogenesis (GO:0044089)	2/88	0.718547	0.823035	-0.195577	0.0646429	SUMO1;SPIDR
sensory perception of sound (GO:0007605)	2/82	0.681624	0.810062	-0.168014	0.064396	HOMER2;CDH23
NIK/NF-kappaB signaling (GO:0038061)	2/81	0.675099	0.807248	-0.160162	0.0629271	PSMD6;BTRC
regulation of cellular localization (GO:0060341)	1/41	0.694121	0.811175	-0.170666	0.0623117	BRSK2
negative regulation of angiogenesis (GO:0016525)	2/70	0.596044	0.780518	-0.117003	0.0605421	DAB2IP;FAM129B
development of primary male sexual characteristics (GO:0046546)	1/44	0.719544	0.823035	-0.178812	0.0588538	KLHL32
regulation of receptor internalization (GO:0002090)	1/29	0.567256	0.766544	-0.102911	0.0583449	AHI1
positive regulation of protein catabolic process (GO:0045732)	2/82	0.681624	0.810062	-0.149957	0.0574752	HECW2;DAB2IP
nucleotide-excision repair, DNA incision (GO:0033683)	1/41	0.694121	0.811175	-0.15105	0.0551496	RPA2
glycoprotein metabolic process (GO:0009100)	1/49	0.757315	0.840509	-0.188187	0.0523116	HPSE
cellular response to starvation (GO:0009267)	3/108	0.596889	0.780518	-0.099241	0.0512107	RPTOR;SREBF1;RIPOR1
cellular response to organonitrogen compound (GO:0071417)	3/98	0.53088	0.754644	-0.0796706	0.050449	RPTOR;P2RX4;CTNNA1
regulation of cation channel activity (GO:2001257)	2/72	0.611424	0.784466	-0.101823	0.0500932	PDE4D;SHANK2
positive regulation of tumor necrosis factor production (GO:0032760)	1/48	0.75019	0.837736	-0.173748	0.0499401	RASGRP1
regulation of organelle assembly (GO:1902115)	1/48	0.75019	0.837736	-0.172389	0.0495495	AKAP13
hexose biosynthetic process (GO:0019319)	1/45	0.727541	0.82457	-0.153524	0.0488336	SLC25A11
inner mitochondrial membrane organization (GO:0007007)	1/37	0.656611	0.797555	-0.115924	0.0487652	ATP5B
action potential (GO:0001508)	2/55	0.466519	0.736476	-0.0636836	0.048556	GNAQ;CACNA1E
nucleic acid metabolic process (GO:0090304)	2/81	0.675099	0.807248	-0.11859	0.0465937	XRN2;POLR2I
positive regulation of macroautophagy (GO:0016239)	1/45	0.727541	0.82457	-0.144621	0.0460017	GPSM1
polyol metabolic process (GO:0019751)	1/48	0.75019	0.837736	-0.159425	0.0458231	IP6K1
keratinocyte differentiation (GO:0030216)	1/60	0.823485	0.87953	-0.23272	0.0451965	ANXA1
antigen processing and presentation of exogenous peptide antigen via MHC class I, TAP-dependent (GO:0002479)	2/76	0.640835	0.794193	-0.1014	0.0451214	VAMP8;PSMD6
respiratory electron transport chain (GO:0022904)	2/95	0.757003	0.840509	-0.161126	0.0448557	NDUFB2;ETFRF1
7-methylguanosine mRNA capping (GO:0006370)	1/33	0.614509	0.784466	-0.0918936	0.0447459	POLR2I
regulation of DNA replication (GO:0006275)	2/62	0.53002	0.754644	-0.069642	0.0442115	CDAN1;EGFR
carboxylic acid transport (GO:0046942)	1/52	0.777493	0.851661	-0.175535	0.0441788	PSAP
vascular endothelial growth factor receptor signaling pathway (GO:0048010)	2/71	0.60379	0.780518	-0.0873086	0.0440497	DAB2IP;RHOA
carbohydrate biosynthetic process (GO:0016051)	1/37	0.656611	0.797555	-0.104301	0.0438755	GALNT7
negative regulation of stress-activated MAPK cascade (GO:0032873)	1/31	0.591564	0.778391	-0.0824922	0.0433072	NCOR1
protein processing (GO:0016485)	3/102	0.558012	0.766544	-0.0733648	0.0427991	HTRA2;LONP2;ECE1
extracellular matrix disassembly (GO:0022617)	2/79	0.661723	0.801175	-0.102069	0.042145	LAMB3;CD44
antigen processing and presentation of exogenous peptide antigen via MHC class I (GO:0042590)	2/79	0.661723	0.801175	-0.101328	0.0418393	VAMP8;PSMD6
ncRNA metabolic process (GO:0034660)	1/35	0.636167	0.789008	-0.0923071	0.0417499	ZCCHC11
positive regulation of protein insertion into mitochondrial membrane involved in apoptotic signaling pathway (GO:1900740)	1/31	0.591564	0.778391	-0.0770214	0.0404351	BID
autophagosome assembly (GO:0000045)	1/59	0.8183	0.876378	-0.199397	0.0399842	ATG4B
regulation of neuron death (GO:1901214)	2/73	0.618946	0.785111	-0.0812746	0.0389905	TRIM2;HTRA2
regulation of interleukin-1 beta secretion (GO:0050706)	1/35	0.636167	0.789008	-0.0835417	0.0377854	FOXP1
positive regulation of protein localization to cell periphery (GO:1904377)	1/47	0.742857	0.834297	-0.123688	0.0367662	EGFR
regulation of protein localization to cell surface (GO:2000008)	1/28	0.554566	0.766544	-0.0622772	0.0367168	HSP90AB1
sodium ion transport (GO:0006814)	1/59	0.8183	0.876378	-0.183063	0.0367088	SLC5A10
regulation of intracellular transport (GO:0032386)	1/41	0.694121	0.811175	-0.0977891	0.0357036	NUP214
positive regulation of cellular protein localization (GO:1903829)	2/67	0.572126	0.771145	-0.0631934	0.035287	RIPOR1;HSP90AB1
transcription-coupled nucleotide-excision repair (GO:0006283)	2/74	0.626354	0.785111	-0.0709107	0.0331748	RPA2;POLR2I
spliceosomal snRNP assembly (GO:0000387)	1/38	0.666398	0.801175	-0.0811455	0.0329344	GEMIN5
positive regulation of chemotaxis (GO:0050921)	1/49	0.757315	0.840509	-0.114391	0.0317979	P2RX4
macromolecular complex assembly (GO:0065003)	3/121	0.673145	0.807248	-0.078216	0.0309575	NFS1;GEMIN5;TUBGCP4
positive regulation of stress-activated MAPK cascade (GO:0032874)	2/81	0.675099	0.807248	-0.0761423	0.029916	DAB2IP;RASGRP1
signal transduction by p53 class mediator (GO:0072331)	1/40	0.685146	0.810062	-0.0776314	0.0293543	FHIT
response to ionizing radiation (GO:0010212)	2/78	0.654871	0.797555	-0.0654239	0.0276951	XRRA1;SPIDR
intrinsic apoptotic signaling pathway by p53 class mediator (GO:0072332)	1/44	0.719544	0.823035	-0.0825799	0.0271801	FHIT
calcium ion transmembrane transport (GO:0070588)	2/87	0.712654	0.821541	-0.0762063	0.0258156	TRPC5;P2RX4
tumor necrosis factor-mediated signaling pathway (GO:0033209)	3/124	0.689153	0.811175	-0.0681854	0.0253849	EDARADD;PSMD6;LTB
signal transduction in response to DNA damage (GO:0042770)	1/26	0.52806	0.754644	-0.0379439	0.0242289	BID
positive regulation of protein polymerization (GO:0032273)	2/65	0.555618	0.766544	-0.0404791	0.0237885	BAIAP2L1;CDC42EP4
regulation of cellular metabolic process (GO:0031323)	1/42	0.702841	0.814618	-0.0664643	0.0234369	PID1
positive regulation of proteasomal ubiquitin-dependent protein catabolic process (GO:0032436)	2/71	0.60379	0.780518	-0.0440886	0.0222439	SUMO1;RCHY1
regulation of insulin secretion (GO:0050796)	3/99	0.537751	0.761015	-0.0349758	0.0216976	DPP4;BRSK2;CACNA1E
positive regulation of protein localization to membrane (GO:1905477)	2/96	0.76211	0.844636	-0.0764523	0.0207694	BID;EGFR
protein export from nucleus (GO:0006611)	1/29	0.567256	0.766544	-0.0363499	0.0206084	NUP214
embryonic skeletal system development (GO:0048706)	1/22	0.470231	0.736476	-0.0269755	0.0203539	FUZ
negative regulation of blood vessel endothelial cell migration (GO:0043537)	1/32	0.603202	0.780518	-0.0387352	0.0195808	RHOA
negative regulation of toll-like receptor signaling pathway (GO:0034122)	1/32	0.603202	0.780518	-0.0358072	0.0181007	DAB2IP
odontogenesis (GO:0042476)	1/42	0.702841	0.814618	-0.0503549	0.0177564	FGFR2
icosanoid metabolic process (GO:0006690)	1/47	0.742857	0.834297	-0.0596363	0.0177269	GPX4
regulation of ossification (GO:0030278)	1/39	0.675907	0.807248	-0.0439936	0.0172323	FGFR2
positive regulation of DNA biosynthetic process (GO:2000573)	1/56	0.801816	0.868204	-0.0771601	0.0170428	HSP90AB1
mesenchymal cell differentiation (GO:0048762)	1/42	0.702841	0.814618	-0.0407867	0.0143824	FGFR2
mitochondrial respiratory chain complex I assembly (GO:0032981)	1/65	0.847275	0.89159	-0.0818396	0.0135633	NDUFB2
sterol homeostasis (GO:0055092)	1/59	0.8183	0.876378	-0.0675278	0.0135411	LIPC
metal ion transport (GO:0030001)	2/102	0.790835	0.861864	-0.0569861	0.0133727	KCNK7;SLC5A10
negative regulation of phosphatase activity (GO:0010923)	2/69	0.588184	0.778391	-0.0244546	0.0129784	CSRNP2;SEMA4D
positive regulation of DNA metabolic process (GO:0051054)	1/83	0.909335	0.927861	-0.133962	0.0127319	EGFR
positive regulation of transmembrane receptor protein serine/threonine kinase signaling pathway (GO:0090100)	2/83	0.688041	0.811175	-0.0311362	0.011642	HSP90AB1;ACVR2A
regulation of axonogenesis (GO:0050770)	1/56	0.801816	0.868204	-0.0517101	0.0114215	RHOA
regulation of blood vessel diameter (GO:0097746)	1/28	0.554566	0.766544	-0.0192474	0.0113477	ECE1
cellular amide metabolic process (GO:0043603)	1/63	0.83817	0.885968	-0.0615294	0.0108621	CERK
cytoplasmic translation (GO:0002181)	1/55	0.795997	0.864848	-0.0475975	0.0108599	RPL18
bicellular tight junction assembly (GO:0070830)	1/29	0.567256	0.766544	-0.0179478	0.0101754	MPP5
monovalent inorganic cation transport (GO:0015672)	2/105	0.804018	0.868591	-0.0435784	0.0095059	KCNK7;SLC5A10
positive regulation of fibroblast proliferation (GO:0048146)	1/29	0.567256	0.766544	-0.014927	0.00846277	SPHK1
positive regulation of NF-kappaB transcription factor activity (GO:0051092)	3/129	0.714515	0.82288	-0.0250489	0.00842022	PRKCB;SPHK1;RBCK1
regulation of stress fiber assembly (GO:0051492)	1/61	0.828522	0.881311	-0.0443175	0.00833665	RHOA
positive regulation of ubiquitin-protein ligase activity involved in regulation of mitotic cell cycle transition (GO:0051437)	2/77	0.647908	0.795191	-0.0183397	0.00795955	PSMD6;BTRC
regulation of TOR signaling (GO:0032006)	1/68	0.859984	0.899734	-0.0526494	0.00794174	RPTOR
negative regulation of peptidase activity (GO:0010466)	1/63	0.83817	0.885968	-0.0415087	0.00732774	SERPINE3
response to reactive oxygen species (GO:0000302)	1/61	0.828522	0.881311	-0.0387656	0.00729228	EGFR
protein-DNA complex assembly (GO:0065004)	1/92	0.930157	0.946236	-0.0881457	0.00638194	RPA2
lysosomal transport (GO:0007041)	2/73	0.618946	0.785111	-0.0127207	0.00610259	AP3M1;TRAK1
positive regulation of NIK/NF-kappaB signaling (GO:1901224)	1/36	0.646537	0.79475	-0.0122923	0.005361	EGFR
negative regulation of intrinsic apoptotic signaling pathway (GO:2001243)	1/63	0.83817	0.885968	-0.0288944	0.00510087	HTRA2
detection of chemical stimulus involved in sensory perception of taste (GO:0050912)	1/45	0.727541	0.82457	-0.0134659	0.00428329	PIGR
sterol metabolic process (GO:0016125)	1/60	0.823485	0.87953	-0.0219244	0.00425794	PRKAG2
DNA damage response, signal transduction by p53 class mediator resulting in cell cycle arrest (GO:0006977)	1/63	0.83817	0.885968	-0.0228013	0.00402523	CNOT2
interferon-gamma-mediated signaling pathway (GO:0060333)	1/71	0.871636	0.907489	-0.026727	0.00367184	CD44
regulation of metal ion transport (GO:0010959)	1/38	0.666398	0.801175	-0.00844164	0.00342619	P2RX4
glycerophospholipid metabolic process (GO:0006650)	1/65	0.847275	0.89159	-0.0117504	0.00194739	PIGL
positive regulation of epithelial cell proliferation (GO:0050679)	2/108	0.816458	0.876378	-0.00931493	0.00188888	FGFR2;EGFR
glucose homeostasis (GO:0042593)	1/75	0.885681	0.91523	-0.0110363	0.00133979	HK1
regulation of cell cycle G2/M phase transition (GO:1902749)	1/85	0.914442	0.93186	-0.0116343	0.00104059	SDCCAG8
regulation of transcription from RNA polymerase II promoter in response to hypoxia (GO:0061418)	1/79	0.898192	0.922125	-0.00812341	0.000872224	PSMD6
negative regulation of cell cycle G2/M phase transition (GO:1902750)	1/70	0.867864	0.905965	-0.00476759	0.000675665	PSMD6
positive regulation of cell projection organization (GO:0031346)	1/64	0.842788	0.889253	-0.00166686	0.000285099	DAB2IP
peptidyl-asparagine modification (GO:0018196)	1/46	0.73531	0.82973	-0.000890096	0.000273672	ST3GAL6
negative regulation of cellular component organization (GO:0051129)	1/55	0.795997	0.864848	-0.000673708	0.000153713	RPL13A
response to organonitrogen compound (GO:0010243)	1/52	0.777493	0.851661	-0.000111257	2.80013e-05	BRSK2
sensory perception of chemical stimulus (GO:0007606)	1/328	0.999929	0.999929	1.7064	-0.000121952	BBS4
negative regulation of neuron apoptotic process (GO:0043524)	1/64	0.842788	0.889253	0.00230098	-0.000393559	RASA1
regulation of immune response (GO:0050776)	1/252	0.999338	0.999763	0.847879	-0.000561584	SLA2
defense response to bacterium (GO:0042742)	1/242	0.999113	0.999763	1.33359	-0.00118328	SELP
sensory perception of smell (GO:0007608)	1/242	0.999113	0.999763	1.60456	-0.00142371	BBS4
positive regulation of developmental growth (GO:0048639)	2/52	0.437785	0.723206	0.00257102	-0.00212373	SEMA4D;CPNE5
skin development (GO:0043588)	1/95	0.935976	0.950923	0.0341601	-0.00226021	ANXA1
positive regulation of immune response (GO:0050778)	1/55	0.795997	0.864848	0.0116694	-0.00266249	IL6ST
Fc-gamma receptor signaling pathway involved in phagocytosis (GO:0038096)	1/134	0.979363	0.983453	0.128787	-0.00268554	HSP90AB1
regulation of bone resorption (GO:0045124)	1/23	0.48532	0.738489	0.00588814	-0.00425682	UBASH3B
regulation of complement activation (GO:0030449)	1/110	0.958568	0.967196	0.104362	-0.00441612	CR2
potassium ion transport (GO:0006813)	1/62	0.833415	0.885316	0.0246258	-0.00448739	KCNK7
oxoacid metabolic process (GO:0043436)	1/33	0.614509	0.784466	0.0097294	-0.00473755	SULT6B1
regulation of viral genome replication (GO:0045069)	1/64	0.842788	0.889253	0.0281835	-0.0048205	PKN2
positive regulation of neurogenesis (GO:0050769)	2/70	0.596044	0.780518	0.00948248	-0.00490663	DAB2IP;RHOA
Rab protein signal transduction (GO:0032482)	1/71	0.871636	0.907489	0.0361188	-0.00496211	RAB27A
negative regulation of cell growth (GO:0030308)	1/116	0.96519	0.972628	0.142832	-0.00506053	ST7L
regulation of transcription from RNA polymerase II promoter in response to stress (GO:0043618)	1/94	0.934092	0.949819	0.081432	-0.00555204	PSMD6
positive regulation of protein secretion (GO:0050714)	1/83	0.909335	0.927861	0.0602544	-0.00572666	MYH10
neutrophil migration (GO:1990266)	1/59	0.8183	0.876378	0.0298713	-0.00598997	PDE4B
neuropeptide signaling pathway (GO:0007218)	1/71	0.871636	0.907489	0.0450772	-0.00619284	SORCS2
regulation of neuron apoptotic process (GO:0043523)	2/90	0.730029	0.826196	0.0223217	-0.007024	TRIM2;RASA1
response to amino acid (GO:0043200)	1/35	0.636167	0.789008	0.0158507	-0.00716919	RPTOR
regulation of phosphatase activity (GO:0010921)	1/73	0.878862	0.910982	0.057072	-0.00736958	CSRNP2
striated muscle contraction (GO:0006941)	1/62	0.833415	0.885316	0.0410763	-0.00748504	RCSD1
regulation of gene expression (GO:0010468)	17/1038	0.996314	0.99801	2.03906	-0.00753034	MBNL1;PID1;TSC22D3;ESRRB;RAB27A;NR2C2;ESR1;BACH2;CLK3;NR6A1;SON;DMTF1;RNF207;UBR5;HIVEP2;RAG2;MAPK4
negative regulation of ubiquitin protein ligase activity (GO:1904667)	1/78	0.895198	0.921022	0.0720551	-0.00797721	PSMD6
cellular calcium ion homeostasis (GO:0006874)	2/124	0.871572	0.907489	0.0587523	-0.00807588	TRPC5;CDH23
pyruvate metabolic process (GO:0006090)	1/47	0.742857	0.834297	0.029277	-0.00870261	HK1
response to interleukin-1 (GO:0070555)	1/77	0.892117	0.919057	0.076454	-0.00872781	DAB2IP
positive regulation of translation (GO:0045727)	2/79	0.661723	0.801175	0.0215718	-0.00890719	RBM3;FAM129A
regulation of nucleic acid-templated transcription (GO:1903506)	8/608	0.996293	0.99801	2.4919	-0.009255	NR6A1;DMTF1;TSC22D3;ESRRB;HIVEP2;NR2C2;ESR1;BACH2
cellular response to hypoxia (GO:0071456)	1/133	0.978755	0.98335	0.472275	-0.0101417	PSMD6
monocyte chemotaxis (GO:0002548)	1/42	0.702841	0.814618	0.0287689	-0.0101446	ANXA1
muscle organ development (GO:0007517)	1/61	0.828522	0.881311	0.055751	-0.0104874	NEB
negative regulation of dephosphorylation (GO:0035305)	1/64	0.842788	0.889253	0.0620254	-0.0106088	CSRNP2
Fc receptor mediated stimulatory signaling pathway (GO:0002431)	1/136	0.980529	0.983453	0.54094	-0.0106368	HSP90AB1
Wnt signaling pathway (GO:0016055)	2/110	0.824355	0.880059	0.0565262	-0.0109183	VRK2;BTRC
negative regulation of cellular biosynthetic process (GO:0031327)	1/48	0.75019	0.837736	0.0398686	-0.0114594	GFI1
regulation of protein targeting to mitochondrion (GO:1903214)	2/89	0.724338	0.82457	0.0361254	-0.0116503	SREBF1;HTRA2
regulation of cytokine production (GO:0001817)	3/109	0.603148	0.780518	0.0237523	-0.012009	ANXA1;DTX4;FOXP1
peptide metabolic process (GO:0006518)	1/105	0.952098	0.963145	0.253684	-0.0124528	GSR
positive regulation of cellular catabolic process (GO:0031331)	1/107	0.954799	0.965462	0.280532	-0.012976	PFKFB3
regulation of actin polymerization or depolymerization (GO:0008064)	1/29	0.567256	0.766544	0.0235999	-0.0133799	RASA1
positive regulation of B cell activation (GO:0050871)	1/120	0.969007	0.975639	0.429266	-0.0135147	BST1
retinoid metabolic process (GO:0001523)	1/76	0.888946	0.917798	0.116659	-0.0137329	DHRS9
cell morphogenesis involved in differentiation (GO:0000904)	1/55	0.795997	0.864848	0.0603507	-0.0137696	SRGAP2
regulation of G-protein coupled receptor protein signaling pathway (GO:0008277)	1/75	0.885681	0.91523	0.120123	-0.0145827	FNTB
regulation of macromolecule metabolic process (GO:0060255)	2/130	0.887988	0.917211	0.127116	-0.015101	RASA1;MAPK4
ion transport (GO:0006811)	4/290	0.966972	0.974006	0.461609	-0.0155033	GABRR1;P2RX5;P2RX4;TSC22D3
negative regulation of extrinsic apoptotic signaling pathway (GO:2001237)	1/77	0.892117	0.919057	0.139125	-0.0158822	TMBIM1
histone acetylation (GO:0016573)	1/72	0.875301	0.909094	0.120785	-0.016087	HAT1
regulation of cellular biosynthetic process (GO:0031326)	1/30	0.579585	0.774712	0.0304176	-0.0165911	PRKAG2
response to UV (GO:0009411)	2/99	0.776876	0.851661	0.0690009	-0.0174209	CCND1;EGFR
regulation of extrinsic apoptotic signaling pathway (GO:2001236)	1/60	0.823485	0.87953	0.0901451	-0.0175071	BID
regulation of cellular macromolecule biosynthetic process (GO:2000112)	10/632	0.986638	0.989159	1.35933	-0.0182862	RBM3;NR6A1;DMTF1;TSC22D3;ESRRB;GEMIN5;HIVEP2;NR2C2;ESR1;BACH2
mitochondrial respiratory chain complex I biogenesis (GO:0097031)	1/65	0.847275	0.89159	0.110599	-0.0183295	NDUFB2
histone modification (GO:0016570)	1/99	0.942989	0.955985	0.328612	-0.0192896	MAP3K12
positive regulation of supramolecular fiber organization (GO:1902905)	2/85	0.700557	0.814618	0.0551474	-0.0196258	BAIAP2L1;CDC42EP4
positive regulation of homeostatic process (GO:0032846)	3/84	0.429293	0.723206	0.0262116	-0.0221649	P2RX5;P2RX4;ACVR2A
positive regulation of cysteine-type endopeptidase activity involved in apoptotic process (GO:0043280)	1/110	0.958568	0.967196	0.52653	-0.0222803	HTRA2
negative regulation of cell morphogenesis involved in differentiation (GO:0010771)	1/31	0.591564	0.778391	0.0424861	-0.0223046	RHOA
positive regulation of cytokine secretion (GO:0050715)	1/74	0.882321	0.913763	0.178758	-0.0223804	RASGRP1
nucleotide-excision repair (GO:0006289)	3/109	0.603148	0.780518	0.0458065	-0.0231594	SUMO1;RPA2;POLR2I
bile acid metabolic process (GO:0008206)	1/31	0.591564	0.778391	0.0445801	-0.0234039	SCP2
protein localization to plasma membrane (GO:0072659)	2/131	0.890527	0.918625	0.209871	-0.0243328	TTC7B;FLNA
NADH dehydrogenase complex assembly (GO:0010257)	1/65	0.847275	0.89159	0.146876	-0.0243417	NDUFB2
negative regulation of cysteine-type endopeptidase activity (GO:2000117)	1/73	0.878862	0.910982	0.191894	-0.0247788	CD44
DNA replication-independent nucleosome assembly (GO:0006336)	1/40	0.685146	0.810062	0.0658932	-0.0249158	HAT1
defense response to Gram-negative bacterium (GO:0050829)	1/72	0.875301	0.909094	0.187598	-0.0249856	SELP
Fc-epsilon receptor signaling pathway (GO:0038095)	3/183	0.896168	0.921214	0.236398	-0.0259155	PSMD6;MAP3K1;BTRC
regulation of B cell activation (GO:0050864)	1/96	0.937806	0.951895	0.412413	-0.0264818	SLA2
water-soluble vitamin metabolic process (GO:0006767)	1/78	0.895198	0.921022	0.240963	-0.026677	CUBN
activation of MAPK activity (GO:0000187)	3/118	0.656538	0.797555	0.0646794	-0.0272154	GNG3;MDFIC;DAB2IP
anaphase-promoting complex-dependent catabolic process (GO:0031145)	1/80	0.9011	0.92346	0.263989	-0.0274916	PSMD6
[truncated: 355 more rows]

## Sheet: DEXSeq Liver (Adar1 KO)
Term	Overlap	P-value	Adjusted P-value	Z-score	Combined Score	Genes
negative regulation of mRNA polyadenylation (GO:1900364)	2/9	0.00260264	0.39681	-2.51476	14.9659	CTR9;NELFE
negative regulation of mRNA 3'-end processing (GO:0031441)	2/10	0.00323473	0.39681	-2.60872	14.9579	CTR9;NELFE
aspartate family amino acid catabolic process (GO:0009068)	3/20	0.000661684	0.39681	-2.03264	14.8804	PHYKPL;SLC25A21;MAT1A
lysine catabolic process (GO:0006554)	2/13	0.00551157	0.39681	-2.53809	13.2004	PHYKPL;SLC25A21
histone H2B ubiquitination (GO:0033523)	2/11	0.00393102	0.39681	-2.27612	12.6071	CTR9;WAC
lysine metabolic process (GO:0006553)	2/13	0.00551157	0.39681	-2.41912	12.5816	PHYKPL;SLC25A21
regulation of B cell receptor signaling pathway (GO:0050855)	2/18	0.0105074	0.443262	-2.73445	12.4573	BLK;ELF1
regulation of mRNA polyadenylation (GO:1900363)	2/12	0.00469034	0.39681	-2.30955	12.3844	CTR9;NELFE
chondroitin sulfate catabolic process (GO:0030207)	2/14	0.00639357	0.408762	-2.40227	12.1374	IDUA;HEXB
positive regulation of stress-activated protein kinase signaling cascade (GO:0070304)	2/16	0.0083355	0.443262	-2.36574	11.3253	TAOK3;EIF2AK2
transport along microtubule (GO:0010970)	2/16	0.0083355	0.443262	-2.35796	11.2881	HSPA8;COPG2
monoamine transport (GO:0015844)	1/7	0.059342	0.443262	-3.74809	10.5862	SLC18A2
regulation of stress-activated MAPK cascade (GO:0032872)	3/42	0.00579285	0.39681	-1.88669	9.71857	TAOK3;EIF2AK2;EGFR
regulation of antigen receptor-mediated signaling pathway (GO:0050854)	2/13	0.00551157	0.39681	-1.79883	9.35557	BLK;ELF1
mitotic G2 DNA damage checkpoint (GO:0007095)	2/18	0.0105074	0.443262	-2.01633	9.18572	FANCI;TAOK3
kynurenine metabolic process (GO:0070189)	1/9	0.0756444	0.443262	-3.4787	8.98101	KMO
oligosaccharide biosynthetic process (GO:0009312)	3/34	0.00317676	0.39681	-1.55071	8.91951	B3GALNT1;B3GALT1;ST3GAL4
positive regulation of extrinsic apoptotic signaling pathway via death domain receptors (GO:1902043)	1/7	0.059342	0.443262	-3.11638	8.80202	TIMP3
regulation of fat cell proliferation (GO:0070344)	1/7	0.059342	0.443262	-3.11366	8.79434	PER2
regulation of t-circle formation (GO:1904429)	1/7	0.059342	0.443262	-3.09723	8.74793	XRCC5
hyaluronan metabolic process (GO:0030212)	2/22	0.0155078	0.443262	-2.08534	8.68837	HEXB;HAS3
oligosaccharide metabolic process (GO:0009311)	4/64	0.00234239	0.39681	-1.41678	8.58083	B3GALNT1;IDUA;B3GALT1;ST3GAL4
histone ubiquitination (GO:0016574)	2/22	0.0155078	0.443262	-2.03232	8.46748	CTR9;WAC
response to UV-A (GO:0070141)	1/7	0.059342	0.443262	-2.98297	8.42523	EGFR
TORC1 signaling (GO:0038202)	1/9	0.0756444	0.443262	-3.24424	8.37569	LARP1
central nervous system neuron axonogenesis (GO:0021955)	1/8	0.0675286	0.443262	-3.10287	8.36287	ARHGAP35
negative regulation of coenzyme metabolic process (GO:0051198)	1/7	0.059342	0.443262	-2.95563	8.34799	ACTN3
aromatic amino acid family catabolic process (GO:0009074)	2/21	0.0141782	0.443262	-1.95374	8.3152	PAH;KMO
positive regulation of autophagy (GO:0010508)	3/68	0.0214688	0.443262	-2.16066	8.29945	TBK1;LARP1;WAC
white fat cell differentiation (GO:0050872)	1/7	0.059342	0.443262	-2.92906	8.27294	PER2
citrulline metabolic process (GO:0000052)	1/7	0.059342	0.443262	-2.92343	8.25705	CPS1
mitotic G2/M transition checkpoint (GO:0044818)	2/24	0.0183199	0.443262	-2.04728	8.18865	FANCI;TAOK3
neurotransmitter loading into synaptic vesicle (GO:0098700)	1/7	0.059342	0.443262	-2.88725	8.15485	SLC18A2
positive regulation of macroautophagy (GO:0016239)	3/45	0.00702563	0.421099	-1.63912	8.12706	TBK1;LARP1;WAC
cellular response to lipoteichoic acid (GO:0071223)	1/7	0.059342	0.443262	-2.84156	8.02582	MAPK14
sulfur amino acid catabolic process (GO:0000098)	1/9	0.0756444	0.443262	-3.10833	8.02482	MAT1A
carbohydrate biosynthetic process (GO:0016051)	3/37	0.00404706	0.39681	-1.4542	8.01228	B3GALNT1;B3GALT1;ST3GAL4
histone monoubiquitination (GO:0010390)	2/25	0.0198005	0.443262	-2.04076	8.00397	CTR9;WAC
response to lipoteichoic acid (GO:0070391)	1/7	0.059342	0.443262	-2.81019	7.93722	MAPK14
sulfur amino acid metabolic process (GO:0000096)	2/23	0.0168887	0.443262	-1.94162	7.92398	CPS1;MAT1A
nucleic acid transport (GO:0050657)	1/8	0.0675286	0.443262	-2.93055	7.89842	CKAP5
benzene-containing compound metabolic process (GO:0042537)	1/9	0.0756444	0.443262	-3.05868	7.89664	KMO
DNA replication initiation (GO:0006270)	2/25	0.0198005	0.443262	-2.00666	7.8702	ORC4;ORC3
negative regulation of glycolytic process (GO:0045820)	1/7	0.059342	0.443262	-2.78133	7.85569	ACTN3
positive regulation of vascular endothelial cell proliferation (GO:1905564)	1/10	0.0836899	0.443262	-3.16258	7.84522	AKT3
negative regulation of biosynthetic process (GO:0009890)	1/9	0.0756444	0.443262	-2.99638	7.73578	SLC18A2
negative regulation of osteoblast proliferation (GO:0033689)	1/8	0.0675286	0.443262	-2.79401	7.53042	EIF2AK2
L-cysteine metabolic process (GO:0046439)	1/8	0.0675286	0.443262	-2.79317	7.52818	AGXT
positive regulation of telomerase activity (GO:0051973)	2/36	0.0390806	0.443262	-2.30272	7.46573	XRCC5;TCP1
protein lipoylation (GO:0009249)	1/9	0.0756444	0.443262	-2.87304	7.41736	POP5
regulation of protein localization to Cajal body (GO:1904869)	1/9	0.0756444	0.443262	-2.85051	7.35919	TCP1
catecholamine transport (GO:0051937)	1/7	0.059342	0.443262	-2.60548	7.35901	SLC18A2
cellular protein modification process (GO:0006464)	16/1002	0.0141764	0.443262	-1.71629	7.30485	CDK18;B3GALNT1;UBE2I;SERPINC1;FN1;EIF2AK2;CSNK1D;AFP;MTMR7;TBK1;PPP3CC;TAOK3;AKT3;B3GALT1;ST3GAL4;SIK3
asymmetric protein localization (GO:0008105)	1/9	0.0756444	0.443262	-2.79945	7.22737	PARD3B
regulation of interleukin-12 secretion (GO:2001182)	1/7	0.059342	0.443262	-2.53644	7.16403	MAPK14
positive regulation of cyclin-dependent protein serine/threonine kinase activity involved in G1/S transition of mitotic cell cycle (GO:0031659)	1/8	0.0675286	0.443262	-2.63847	7.11121	EGFR
positive regulation of catenin import into nucleus (GO:0035413)	1/9	0.0756444	0.443262	-2.74514	7.08716	EGFR
microtubule polymerization (GO:0046785)	2/28	0.024529	0.443262	-1.91084	7.08522	CSNK1D;CKAP5
positive regulation of protein localization to Cajal body (GO:1904871)	1/9	0.0756444	0.443262	-2.74356	7.08307	TCP1
establishment of integrated proviral latency (GO:0075713)	1/9	0.0756444	0.443262	-2.73952	7.07265	XRCC5
arginine biosynthetic process (GO:0006526)	1/7	0.059342	0.443262	-2.50239	7.06785	CPS1
aldehyde catabolic process (GO:0046185)	1/7	0.059342	0.443262	-2.49664	7.0516	AGXT
regulation of actin polymerization or depolymerization (GO:0008064)	2/29	0.0261976	0.443262	-1.91708	6.98218	FCHSD2;ARHGAP35
negative regulation of membrane protein ectodomain proteolysis (GO:0051045)	1/8	0.0675286	0.443262	-2.5809	6.95605	TIMP3
establishment of viral latency (GO:0019043)	1/10	0.0836899	0.443262	-2.76934	6.86972	XRCC5
peptidyl-serine phosphorylation (GO:0018105)	5/146	0.00907141	0.443262	-1.44966	6.81723	TBK1;AKT3;CSNK1D;MASTL;MAPK14
global genome nucleotide-excision repair (GO:0070911)	2/33	0.0333103	0.443262	-1.9991	6.8007	UBE2I;XPA
negative regulation of cardiocyte differentiation (GO:1905208)	1/8	0.0675286	0.443262	-2.51579	6.78058	EGFR
protein desumoylation (GO:0016926)	1/9	0.0756444	0.443262	-2.59363	6.696	SENP5
plasma membrane to endosome transport (GO:0048227)	1/9	0.0756444	0.443262	-2.58725	6.67955	USP6NL
pyrimidine nucleobase metabolic process (GO:0006206)	1/9	0.0756444	0.443262	-2.58533	6.67458	DPYD
positive regulation of production of miRNAs involved in gene silencing by miRNA (GO:1903800)	1/9	0.0756444	0.443262	-2.57779	6.65511	EGFR
nitrogen compound transport (GO:0071705)	3/75	0.0276878	0.443262	-1.85306	6.64648	SLC16A10;SLC17A1;SLC18A2
regulation of transcription involved in cell fate commitment (GO:0060850)	1/8	0.0675286	0.443262	-2.46413	6.64132	NR2F2
positive regulation of protein sumoylation (GO:0033235)	1/10	0.0836899	0.443262	-2.65345	6.58224	UBE2I
alpha-amino acid biosynthetic process (GO:1901607)	1/9	0.0756444	0.443262	-2.54038	6.55853	CPS1
glyoxylate metabolic process (GO:0046487)	1/8	0.0675286	0.443262	-2.43195	6.55461	AGXT
mitotic DNA damage checkpoint (GO:0044773)	2/40	0.0473124	0.443262	-2.1472	6.55106	FANCI;TAOK3
regulation of NIK/NF-kappaB signaling (GO:1901222)	2/29	0.0261976	0.443262	-1.79363	6.53257	EIF2AK2;EGFR
regulation of supramolecular fiber organization (GO:1902903)	2/27	0.022906	0.443262	-1.72824	6.52645	HSPA8;ARHGAP35
phosphorylation (GO:0016310)	8/387	0.020252	0.443262	-1.66595	6.4964	CDK18;TBK1;TAOK3;AKT3;ADK;SIK3;EIF2AK2;CSNK1D
galactosylceramide metabolic process (GO:0006681)	1/7	0.059342	0.443262	-2.29943	6.49461	B3GALT1
cell cycle G2/M phase transition (GO:0044839)	4/128	0.0256845	0.443262	-1.7644	6.46101	BORA;CSNK1D;MASTL;CKAP5
protein-cofactor linkage (GO:0018065)	1/11	0.0916658	0.443262	-2.69783	6.44675	POP5
keratan sulfate metabolic process (GO:0042339)	2/35	0.0371174	0.443262	-1.95401	6.43585	HEXB;ST3GAL4
chondroitin sulfate metabolic process (GO:0030204)	2/31	0.0296681	0.443262	-1.82847	6.43198	IDUA;HEXB
positive regulation of establishment of protein localization to telomere (GO:1904851)	1/10	0.0836899	0.443262	-2.58982	6.42441	TCP1
protein phosphorylation (GO:0006468)	11/471	0.0028439	0.39681	-1.09533	6.42145	CDK18;TBK1;ABI2;TAOK3;AKT3;SIK3;EIF2AK2;CSNK1D;MASTL;MAPK14;EGFR
respiratory chain complex III assembly (GO:0017062)	1/10	0.0836899	0.443262	-2.58765	6.41902	TTC19
negative regulation of stress-activated MAPK cascade (GO:0032873)	2/31	0.0296681	0.443262	-1.82018	6.40281	TAOK3;AIDA
multi-ciliated epithelial cell differentiation (GO:1903251)	1/9	0.0756444	0.443262	-2.47284	6.38416	CCDC78
glycoprotein biosynthetic process (GO:0009101)	3/73	0.0258232	0.443262	-1.73436	6.34166	B3GALNT1;B3GALT1;ST3GAL4
monocarboxylic acid catabolic process (GO:0072329)	2/26	0.0213295	0.443262	-1.6458	6.33248	IDUA;AGXT
stress-induced premature senescence (GO:0090400)	1/9	0.0756444	0.443262	-2.41387	6.23192	MAPK14
regulation of cellular respiration (GO:0043457)	1/11	0.0916658	0.443262	-2.59657	6.20478	ACTN3
positive regulation of synapse maturation (GO:0090129)	1/10	0.0836899	0.443262	-2.47296	6.13451	ADGRL1
activation of MAPKK activity (GO:0000186)	2/34	0.0351937	0.443262	-1.82987	6.12436	TAOK3;EIF2AK2
carbohydrate phosphorylation (GO:0046835)	1/12	0.0995726	0.443262	-2.65209	6.11802	ADK
intraciliary retrograde transport (GO:0035721)	1/11	0.0916658	0.443262	-2.55998	6.11735	WDR19
positive regulation of NIK/NF-kappaB signaling (GO:1901224)	2/36	0.0390806	0.443262	-1.87821	6.0894	EIF2AK2;EGFR
positive regulation of myoblast fusion (GO:1901741)	1/12	0.0995726	0.443262	-2.62796	6.06237	MAPK14
urate transport (GO:0015747)	1/11	0.0916658	0.443262	-2.53602	6.06008	SLC17A1
indolalkylamine catabolic process (GO:0046218)	1/10	0.0836899	0.443262	-2.43729	6.04604	KMO
sulfur compound catabolic process (GO:0044273)	2/36	0.0390806	0.443262	-1.86054	6.03211	IDUA;HEXB
G1 DNA damage checkpoint (GO:0044783)	1/11	0.0916658	0.443262	-2.51821	6.01752	WAC
UV-damage excision repair (GO:0070914)	1/12	0.0995726	0.443262	-2.58953	5.97371	XPA
methionine metabolic process (GO:0006555)	1/12	0.0995726	0.443262	-2.58762	5.96931	MAT1A
nuclear migration (GO:0007097)	1/10	0.0836899	0.443262	-2.38771	5.92304	TMEM201
glycolipid metabolic process (GO:0006664)	3/66	0.0198499	0.443262	-1.50559	5.90125	B3GALNT1;HEXB;ST3GAL4
peptidyl-serine modification (GO:0018209)	5/171	0.017013	0.443262	-1.44646	5.89256	TBK1;AKT3;CSNK1D;MASTL;MAPK14
mitochondrial respiratory chain complex III assembly (GO:0034551)	1/10	0.0836899	0.443262	-2.37294	5.88641	TTC19
integrin activation (GO:0033622)	1/9	0.0756444	0.443262	-2.27577	5.87538	FN1
regulation of synapse maturation (GO:0090128)	1/11	0.0916658	0.443262	-2.45493	5.86632	ADGRL1
regulation of establishment of protein localization to telomere (GO:0070203)	1/11	0.0916658	0.443262	-2.4487	5.85142	TCP1
regulation of NLRP3 inflammasome complex assembly (GO:1900225)	1/11	0.0916658	0.443262	-2.44788	5.84948	EIF2AK2
erythrose 4-phosphate/phosphoenolpyruvate family amino acid catabolic process (GO:1902222)	1/12	0.0995726	0.443262	-2.51062	5.79166	PAH
central nervous system neuron development (GO:0021954)	1/10	0.0836899	0.443262	-2.33055	5.78125	ARHGAP35
organelle transport along microtubule (GO:0072384)	2/32	0.0314682	0.443262	-1.67095	5.77945	TMEM201;COPG2
negative regulation of cellular senescence (GO:2000773)	1/12	0.0995726	0.443262	-2.50503	5.77878	AKT3
neuron projection fasciculation (GO:0106030)	1/11	0.0916658	0.443262	-2.41392	5.76833	ARHGAP35
negative regulation of JNK cascade (GO:0046329)	2/29	0.0261976	0.443262	-1.58367	5.76785	TAOK3;AIDA
homocysteine metabolic process (GO:0050667)	1/10	0.0836899	0.443262	-2.31629	5.74587	CPS1
endodermal cell differentiation (GO:0035987)	2/33	0.0333103	0.443262	-1.68152	5.72034	CTR9;FN1
positive regulation of telomere maintenance via telomerase (GO:0032212)	2/33	0.0333103	0.443262	-1.68092	5.7183	XRCC5;TCP1
tryptophan metabolic process (GO:0006568)	1/11	0.0916658	0.443262	-2.38359	5.69585	KMO
positive regulation of skeletal muscle tissue development (GO:0048643)	1/13	0.107411	0.443262	-2.54513	5.67843	ACTN3
positive regulation of catalytic activity (GO:0043085)	2/34	0.0351937	0.443262	-1.68763	5.6483	XRCC5;MAPK14
negative regulation of circadian rhythm (GO:0042754)	1/10	0.0836899	0.443262	-2.2726	5.6375	PER2
regulation of JUN kinase activity (GO:0043506)	2/35	0.0371174	0.443262	-1.70681	5.62168	TAOK3;AIDA
L-phenylalanine catabolic process (GO:0006559)	1/12	0.0995726	0.443262	-2.43259	5.61167	PAH
mRNA stabilization (GO:0048255)	2/34	0.0351937	0.443262	-1.66959	5.58795	LARP1;MAPK14
regulation of hemopoiesis (GO:1903706)	1/12	0.0995726	0.443262	-2.42126	5.58552	EIF2AK2
G2 DNA damage checkpoint (GO:0031572)	2/33	0.0333103	0.443262	-1.64086	5.58203	FANCI;TAOK3
alpha-amino acid metabolic process (GO:1901605)	2/32	0.0314682	0.443262	-1.61009	5.56894	CPS1;KMO
regulation of proteasomal ubiquitin-dependent protein catabolic process (GO:0032434)	3/89	0.0426806	0.443262	-1.76543	5.56819	RNF144B;WAC;CSNK1D
L-phenylalanine metabolic process (GO:0006558)	1/12	0.0995726	0.443262	-2.41201	5.56419	PAH
mitochondrial respiratory chain complex III biogenesis (GO:0097033)	1/11	0.0916658	0.443262	-2.32822	5.56352	TTC19
positive regulation of non-canonical Wnt signaling pathway (GO:2000052)	1/9	0.0756444	0.443262	-2.15361	5.56	CSNK1D
negative regulation of cellular macromolecule biosynthetic process (GO:2000113)	11/513	0.00538261	0.39681	-1.06198	5.54839	PER2;HSPA8;LARP1;UBE2I;XRCC5;WWP1;UBP1;EIF2AK2;NR2F2;CNOT8;ARHGAP35
peptidyl-lysine modification (GO:0018205)	4/116	0.0186612	0.443262	-1.37868	5.48897	POP5;SENP5;UBE2I;ESCO1
regulation of actin filament length (GO:0030832)	1/11	0.0916658	0.443262	-2.2966	5.48796	ARHGAP35
protein N-linked glycosylation (GO:0006487)	3/74	0.0267468	0.443262	-1.51417	5.48332	B3GALNT1;B3GALT1;ST3GAL4
tRNA 5'-leader removal (GO:0001682)	1/13	0.107411	0.443262	-2.44472	5.4544	POP5
tryptophan catabolic process (GO:0006569)	1/11	0.0916658	0.443262	-2.28182	5.45266	KMO
regulation of myoblast fusion (GO:1901739)	1/13	0.107411	0.443262	-2.44188	5.44807	MAPK14
pyrimidine nucleoside catabolic process (GO:0046135)	1/12	0.0995726	0.443262	-2.36063	5.44566	DPYD
positive regulation of protein localization to chromosome, telomeric region (GO:1904816)	1/12	0.0995726	0.443262	-2.3373	5.39184	TCP1
regulation of endopeptidase activity (GO:0052548)	3/69	0.0223046	0.443262	-1.40832	5.35579	SERPINC1;SERPINE3;TIMP3
regulation of histone methylation (GO:0031060)	1/13	0.107411	0.443262	-2.38758	5.32692	CTR9
vasodilation (GO:0042311)	1/10	0.0836899	0.443262	-2.14641	5.32448	CPS1
positive regulation of telomere maintenance via telomere lengthening (GO:1904358)	2/35	0.0371174	0.443262	-1.61207	5.30963	XRCC5;TCP1
glycosphingolipid metabolic process (GO:0006687)	2/55	0.0828583	0.443262	-2.1104	5.2562	B3GALNT1;HEXB
regulation of cytokine production (GO:0001817)	4/109	0.0151873	0.443262	-1.2505	5.23622	TBK1;EIF2AK2;MAPK14;DTX4
regulation of telomerase activity (GO:0051972)	2/43	0.0538618	0.443262	-1.78467	5.2136	XRCC5;TCP1
regulation of non-canonical Wnt signaling pathway (GO:2000050)	1/12	0.0995726	0.443262	-2.24559	5.18028	CSNK1D
negative regulation of ATP metabolic process (GO:1903579)	1/13	0.107411	0.443262	-2.31933	5.17464	ACTN3
histone H3-K4 trimethylation (GO:0080182)	1/10	0.0836899	0.443262	-2.08246	5.16583	CTR9
urea cycle (GO:0000050)	1/12	0.0995726	0.443262	-2.23849	5.1639	CPS1
negative regulation of peptidase activity (GO:0010466)	3/63	0.0175532	0.443262	-1.26769	5.12468	SERPINC1;SERPINE3;TIMP3
protein insertion into membrane (GO:0051205)	1/13	0.107411	0.443262	-2.28855	5.10598	EGFR
phosphate ion transport (GO:0006817)	1/14	0.115182	0.443262	-2.35851	5.09732	SLC17A1
protein localization to organelle (GO:0033365)	3/98	0.0540651	0.443262	-1.74539	5.09229	CEP68;XPA;CSNK1D
peptidyl-tyrosine autophosphorylation (GO:0038083)	2/46	0.0607104	0.443262	-1.8067	5.06172	BLK;EGFR
hyaluronan biosynthetic process (GO:0030213)	1/8	0.0675286	0.443262	-1.87667	5.058	HAS3
cellular response to ionizing radiation (GO:0071479)	2/47	0.0630564	0.443262	-1.82228	5.03627	XRCC5;MAPK14
negative regulation of cellular amide metabolic process (GO:0034249)	3/76	0.0286463	0.443262	-1.41565	5.02944	LARP1;EIF2AK2;CNOT8
cellular response to radiation (GO:0071478)	2/43	0.0538618	0.443262	-1.71519	5.01064	OPN3;MAPK14
arginine metabolic process (GO:0006525)	1/12	0.0995726	0.443262	-2.1698	5.00543	CPS1
mitotic cell cycle phase transition (GO:0044772)	6/222	0.0132409	0.443262	-1.15561	4.99737	ORC4;BORA;ORC3;CSNK1D;MASTL;CKAP5
regulation of JNK cascade (GO:0046328)	3/91	0.045095	0.443262	-1.61013	4.98977	TAOK3;AIDA;EGFR
calcineurin-NFAT signaling cascade (GO:0033173)	1/12	0.0995726	0.443262	-2.16294	4.98962	PPP3CC
regulation of DNA metabolic process (GO:0051052)	2/47	0.0630564	0.443262	-1.79862	4.97089	ESCO1;XRCC5
positive regulation of actin nucleation (GO:0051127)	1/14	0.115182	0.443262	-2.29834	4.96728	ABI2
purine nucleobase metabolic process (GO:0006144)	1/12	0.0995726	0.443262	-2.14006	4.93684	DPYD
histone H3 deacetylation (GO:0070932)	1/13	0.107411	0.443262	-2.19226	4.89113	PER2
mitochondrial genome maintenance (GO:0000002)	1/14	0.115182	0.443262	-2.25486	4.87331	AKT3
negative regulation of reactive oxygen species biosynthetic process (GO:1903427)	1/14	0.115182	0.443262	-2.24754	4.85748	SLC18A2
protein monoubiquitination (GO:0006513)	2/38	0.0431223	0.443262	-1.53808	4.83527	CTR9;WAC
negative regulation of gene expression (GO:0010629)	11/619	0.0197949	0.443262	-1.22803	4.81675	PER2;HSPA8;LARP1;UBE2I;XRCC5;WWP1;UBP1;EIF2AK2;NR2F2;CNOT8;ARHGAP35
positive regulation of mRNA metabolic process (GO:1903313)	1/13	0.107411	0.443262	-2.14402	4.7835	CNOT8
G2/M transition of mitotic cell cycle (GO:0000086)	4/127	0.0250465	0.443262	-1.2955	4.77653	BORA;CSNK1D;MASTL;CKAP5
DNA damage checkpoint (GO:0000077)	2/39	0.0451992	0.443262	-1.53474	4.75259	TAOK3;WAC
glutamine family amino acid biosynthetic process (GO:0009084)	1/14	0.115182	0.443262	-2.19674	4.7477	CPS1
synaptic vesicle cycle (GO:0099504)	1/14	0.115182	0.443262	-2.19128	4.7359	SLC18A2
peptidyl-tyrosine phosphorylation (GO:0018108)	3/80	0.0326546	0.443262	-1.38394	4.73553	BLK;ABI2;EGFR
pyrimidine-containing compound catabolic process (GO:0072529)	1/15	0.122885	0.443262	-2.24979	4.71669	DPYD
calcineurin-mediated signaling (GO:0097720)	1/13	0.107411	0.443262	-2.11095	4.70973	PPP3CC
axonal fasciculation (GO:0007413)	1/13	0.107411	0.443262	-2.07267	4.62433	ARHGAP35
cellular response to nitrogen compound (GO:1901699)	1/15	0.122885	0.443262	-2.18747	4.58605	CPS1
negative regulation of hemopoiesis (GO:1903707)	1/15	0.122885	0.443262	-2.18611	4.5832	CTR9
endodermal cell fate commitment (GO:0001711)	1/9	0.0756444	0.443262	-1.77364	4.57904	CTR9
neurotransmitter biosynthetic process (GO:0042136)	1/15	0.122885	0.443262	-2.18385	4.57847	PAH
nucleoside catabolic process (GO:0009164)	1/13	0.107411	0.443262	-2.0475	4.56817	DPYD
urate metabolic process (GO:0046415)	1/12	0.0995726	0.443262	-1.9797	4.5669	SLC17A1
positive regulation of myoblast differentiation (GO:0045663)	1/15	0.122885	0.443262	-2.16234	4.53336	MAPK14
purine-containing compound salvage (GO:0043101)	1/15	0.122885	0.443262	-2.14922	4.50584	ADK
negative regulation of cell aging (GO:0090344)	1/16	0.130522	0.443262	-2.21009	4.50022	AKT3
protein autophosphorylation (GO:0046777)	4/176	0.0679462	0.443262	-1.67015	4.4911	BLK;TAOK3;EIF2AK2;EGFR
positive regulation of cell migration involved in sprouting angiogenesis (GO:0090050)	1/17	0.138092	0.443262	-2.26331	4.48097	AKT3
peptidyl-lysine acetylation (GO:0018394)	1/9	0.0756444	0.443262	-1.73267	4.47324	ESCO1
catecholamine biosynthetic process (GO:0042423)	1/14	0.115182	0.443262	-2.0649	4.46275	PAH
positive regulation of histone H3-K4 methylation (GO:0051571)	1/14	0.115182	0.443262	-2.06285	4.45832	CTR9
regulation of intracellular signal transduction (GO:1902531)	7/423	0.0770274	0.443262	-1.73265	4.4418	TIAM2;GDF11;MAPK14;ARHGAP26;FGD1;EGFR;ARHGAP35
purine-containing compound metabolic process (GO:0072521)	1/18	0.145597	0.443262	-2.30412	4.43984	SLC17A1
peptidyl-tyrosine modification (GO:0018212)	2/52	0.0752272	0.443262	-1.71502	4.43718	ABI2;EGFR
hyaluronan catabolic process (GO:0030214)	1/17	0.138092	0.443262	-2.23418	4.42331	HEXB
negative regulation of protein catabolic process (GO:0042177)	2/40	0.0473124	0.443262	-1.44786	4.41739	TIMP3;EGFR
regulation of mRNA catabolic process (GO:0061013)	1/15	0.122885	0.443262	-2.0887	4.37897	CNOT8
cAMP biosynthetic process (GO:0006171)	1/15	0.122885	0.443262	-2.08836	4.37826	ADCY10
keratan sulfate catabolic process (GO:0042340)	1/13	0.107411	0.443262	-1.95783	4.36809	HEXB
regulation of Arp2/3 complex-mediated actin nucleation (GO:0034315)	1/11	0.0916658	0.443262	-1.81968	4.34832	ABI2
negative regulation of cellular protein metabolic process (GO:0032269)	3/90	0.0438795	0.443262	-1.3837	4.32587	LARP1;EIF2AK2;CNOT8
protein localization to chromosome, telomeric region (GO:0070198)	1/16	0.130522	0.443262	-2.12145	4.31974	XRCC5
nitric oxide metabolic process (GO:0046209)	1/13	0.107411	0.443262	-1.93508	4.31733	CPS1
interstrand cross-link repair (GO:0036297)	2/49	0.0678385	0.443262	-1.60348	4.31436	FANCI;XPA
regulation of cellular carbohydrate metabolic process (GO:0010675)	1/14	0.115182	0.443262	-1.99237	4.306	SIK3
regulation of calcineurin-NFAT signaling cascade (GO:0070884)	1/15	0.122885	0.443262	-2.05271	4.30351	ACTN3
dermatan sulfate metabolic process (GO:0030205)	1/14	0.115182	0.443262	-1.99083	4.30266	IDUA
positive regulation of telomerase RNA localization to Cajal body (GO:1904874)	1/16	0.130522	0.443262	-2.10807	4.29248	TCP1
response to X-ray (GO:0010165)	1/16	0.130522	0.443262	-2.10174	4.2796	XRCC5
cellular response to virus (GO:0098586)	1/16	0.130522	0.443262	-2.09082	4.25736	MAPK14
regulation of small GTPase mediated signal transduction (GO:0051056)	4/141	0.0348717	0.443262	-1.26824	4.2563	TIAM2;ARHGAP26;FGD1;ARHGAP35
purine-containing compound catabolic process (GO:0072523)	1/15	0.122885	0.443262	-2.02979	4.25547	DPYD
carboxylic acid biosynthetic process (GO:0046394)	2/45	0.0583956	0.443262	-1.49801	4.25512	PAH;HAS3
regulation of production of miRNAs involved in gene silencing by miRNA (GO:1903798)	1/14	0.115182	0.443262	-1.96456	4.2459	EGFR
epiboly involved in wound healing (GO:0090505)	1/15	0.122885	0.443262	-2.02452	4.24441	ARHGAP35
positive regulation of myotube differentiation (GO:0010831)	1/17	0.138092	0.443262	-2.13722	4.23134	MAPK14
ribonucleoside monophosphate biosynthetic process (GO:0009156)	1/15	0.122885	0.443262	-2.01728	4.22924	ADK
glycosaminoglycan catabolic process (GO:0006027)	2/57	0.0880719	0.443262	-1.73089	4.20536	IDUA;HEXB
microtubule nucleation (GO:0007020)	1/18	0.145597	0.443262	-2.16676	4.17515	CSNK1D
negative regulation of transcription regulatory region DNA binding (GO:2000678)	1/17	0.138092	0.443262	-2.10585	4.16924	PER2
protein localization to microtubule organizing center (GO:1905508)	1/17	0.138092	0.443262	-2.10138	4.16038	CSNK1D
positive regulation of glucose metabolic process (GO:0010907)	1/12	0.0995726	0.443262	-1.80291	4.15907	ACTN3
pyrimidine nucleoside metabolic process (GO:0006213)	1/16	0.130522	0.443262	-2.04192	4.15778	DPYD
microtubule depolymerization (GO:0007019)	1/16	0.130522	0.443262	-2.0392	4.15226	CKAP5
negative regulation of translation (GO:0017148)	3/89	0.0426806	0.443262	-1.31594	4.15047	LARP1;EIF2AK2;CNOT8
regulation of type I interferon production (GO:0032479)	3/86	0.0391852	0.443262	-1.28026	4.14734	TBK1;XRCC5;DTX4
negative regulation of catabolic process (GO:0009895)	2/41	0.049461	0.443262	-1.37881	4.14549	ACTN3;EGFR
regulation of cell development (GO:0060284)	1/21	0.167724	0.451819	-2.30955	4.12356	PER2
neuron apoptotic process (GO:0051402)	1/17	0.138092	0.443262	-2.075	4.10816	CIT
negative regulation of reactive oxygen species metabolic process (GO:2000378)	1/18	0.145597	0.443262	-2.13055	4.10539	SLC18A2
regulation of stem cell proliferation (GO:0072091)	1/17	0.138092	0.443262	-2.06886	4.096	EIF2AK2
regulation of oxidative phosphorylation (GO:0002082)	1/10	0.0836899	0.443262	-1.63967	4.06743	ACTN3
regulation of reactive oxygen species biosynthetic process (GO:1903426)	1/17	0.138092	0.443262	-2.04949	4.05765	SLC18A2
chaperone-mediated protein transport (GO:0072321)	1/11	0.0916658	0.443262	-1.68579	4.02837	HSPA8
negative regulation of endopeptidase activity (GO:0010951)	3/84	0.0369398	0.443262	-1.22083	4.02687	SERPINC1;SERPINE3;TIMP3
positive regulation of transferase activity (GO:0051347)	4/138	0.0326034	0.443262	-1.17619	4.02648	UBE2I;XRCC5;TCP1;EGFR
RNA stabilization (GO:0043489)	1/18	0.145597	0.443262	-2.08462	4.01687	LARP1
extracellular matrix assembly (GO:0085029)	1/17	0.138092	0.443262	-2.02787	4.01485	HAS3
negative regulation of JUN kinase activity (GO:0043508)	1/12	0.0995726	0.443262	-1.73803	4.0094	AIDA
filopodium assembly (GO:0046847)	1/16	0.130522	0.443262	-1.9573	3.98548	FGD1
Golgi to endosome transport (GO:0006895)	1/21	0.167724	0.451819	-2.23147	3.98414	DOPEY1
virion assembly (GO:0019068)	1/18	0.145597	0.443262	-2.05741	3.96445	USP6NL
positive regulation of type I interferon production (GO:0032481)	2/63	0.104264	0.443262	-1.73843	3.93029	TBK1;XRCC5
positive regulation of transcription elongation from RNA polymerase II promoter (GO:0032968)	1/16	0.130522	0.443262	-1.92958	3.92905	CTR9
neurotransmitter transport (GO:0006836)	1/17	0.138092	0.443262	-1.98191	3.92385	SLC18A2
calcium-mediated signaling using intracellular calcium source (GO:0035584)	1/19	0.153037	0.443391	-2.09002	3.92313	ADGRL1
negative regulation of telomere maintenance (GO:0032205)	1/18	0.145597	0.443262	-2.03432	3.91996	XRCC5
regulation of histone H3-K4 methylation (GO:0051569)	1/17	0.138092	0.443262	-1.96637	3.89308	CTR9
regulation of macroautophagy (GO:0016241)	3/117	0.0822737	0.443262	-1.54766	3.86559	TBK1;LARP1;WAC
positive regulation of blood vessel diameter (GO:0097755)	1/15	0.122885	0.443262	-1.8436	3.86513	CPS1
cellular response to inorganic substance (GO:0071241)	1/18	0.145597	0.443262	-1.98902	3.83267	ADCY10
positive regulation of establishment of protein localization (GO:1904951)	1/13	0.107411	0.443262	-1.71402	3.82413	TCP1
regulation of vascular endothelial cell proliferation (GO:1905562)	1/13	0.107411	0.443262	-1.71356	3.82312	AKT3
UV protection (GO:0009650)	1/11	0.0916658	0.443262	-1.5951	3.81167	XPA
positive regulation of cilium assembly (GO:0045724)	1/17	0.138092	0.443262	-1.9213	3.80385	ARHGAP35
regulation of chemokine production (GO:0032642)	1/19	0.153037	0.443391	-2.02445	3.80005	EIF2AK2
negative regulation of tumor necrosis factor-mediated signaling pathway (GO:0010804)	1/18	0.145597	0.443262	-1.97053	3.79704	CCDC3
calcium-mediated signaling (GO:0019722)	2/71	0.12697	0.443262	-1.83438	3.78581	ADGRL1;EGFR
establishment or maintenance of actin cytoskeleton polarity (GO:0030950)	1/15	0.122885	0.443262	-1.80402	3.78214	ARHGAP35
regulation of interferon-alpha production (GO:0032647)	1/17	0.138092	0.443262	-1.90775	3.77703	TBK1
catecholamine metabolic process (GO:0006584)	1/16	0.130522	0.443262	-1.85325	3.77363	PAH
regulation of cyclin-dependent protein serine/threonine kinase activity involved in G1/S transition of mitotic cell cycle (GO:0031657)	1/15	0.122885	0.443262	-1.79591	3.76513	EGFR
regulation of protein homodimerization activity (GO:0043496)	1/17	0.138092	0.443262	-1.89783	3.7574	AIDA
negative regulation of nucleic acid-templated transcription (GO:1903507)	8/445	0.0412417	0.443262	-1.17682	3.75206	PER2;HSPA8;UBE2I;XRCC5;WWP1;UBP1;NR2F2;ARHGAP35
photoperiodism (GO:0009648)	1/22	0.174973	0.452565	-2.12326	3.70111	PER2
viral life cycle (GO:0019058)	3/108	0.0682345	0.443262	-1.37268	3.68538	USP6NL;WWP1;UBP1
nucleobase-containing compound biosynthetic process (GO:0034654)	1/18	0.145597	0.443262	-1.90458	3.66996	ADK
3'-UTR-mediated mRNA stabilization (GO:0070935)	1/18	0.145597	0.443262	-1.90044	3.66198	MAPK14
skeletal muscle contraction (GO:0003009)	1/19	0.153037	0.443391	-1.95004	3.66037	CCDC78
glucan biosynthetic process (GO:0009250)	1/19	0.153037	0.443391	-1.94707	3.65479	PER2
regulation of telomere maintenance via telomerase (GO:0032210)	2/52	0.0752272	0.443262	-1.40726	3.64091	XRCC5;TCP1
positive regulation of MAP kinase activity (GO:0043406)	4/178	0.0701987	0.443262	-1.37012	3.63962	TAOK3;EIF2AK2;MAPK14;EGFR
regulation of osteoblast proliferation (GO:0033688)	1/17	0.138092	0.443262	-1.81698	3.59731	EIF2AK2
positive regulation of striated muscle cell differentiation (GO:0051155)	1/18	0.145597	0.443262	-1.86161	3.58716	MAPK14
cellular response to gamma radiation (GO:0071480)	1/18	0.145597	0.443262	-1.85067	3.56608	XRCC5
negative regulation of calcium-mediated signaling (GO:0050849)	1/19	0.153037	0.443391	-1.89661	3.56008	ACTN3
vitamin D metabolic process (GO:0042359)	1/16	0.130522	0.443262	-1.74819	3.5597	UBE2I
positive regulation of catabolic process (GO:0009896)	2/63	0.104264	0.443262	-1.57369	3.55785	ACTN3;WWP1
neuromuscular synaptic transmission (GO:0007274)	1/25	0.196344	0.452629	-2.18229	3.55253	FCHSD2
establishment or maintenance of apical/basal cell polarity (GO:0035088)	1/19	0.153037	0.443391	-1.87551	3.52047	PARD3B
regulation of telomerase RNA localization to Cajal body (GO:1904872)	1/19	0.153037	0.443391	-1.86812	3.5066	TCP1
positive regulation of cell-substrate adhesion (GO:0010811)	2/53	0.0777448	0.443262	-1.36905	3.497	FN1;RSU1
focal adhesion assembly (GO:0048041)	1/19	0.153037	0.443391	-1.84429	3.46188	ACTN3
DNA-dependent DNA replication (GO:0006261)	2/57	0.0880719	0.443262	-1.41637	3.44121	ORC4;ORC3
response to light stimulus (GO:0009416)	2/59	0.0933806	0.443262	-1.45091	3.44021	PER2;OPN3
carboxylic acid transport (GO:0046942)	2/52	0.0752272	0.443262	-1.32485	3.42772	SLC16A10;SLC25A21
entrainment of circadian clock by photoperiod (GO:0043153)	1/21	0.167724	0.451819	-1.91866	3.42563	PER2
positive regulation of interferon-alpha production (GO:0032727)	1/20	0.160413	0.447197	-1.8673	3.41717	TBK1
cell-substrate adherens junction assembly (GO:0007045)	1/19	0.153037	0.443391	-1.81928	3.41493	ACTN3
regulation of Golgi organization (GO:1903358)	1/15	0.122885	0.443262	-1.62768	3.41244	USP6NL
Rac protein signal transduction (GO:0016601)	1/20	0.160413	0.447197	-1.85546	3.3955	ABI2
nucleotide-sugar biosynthetic process (GO:0009226)	1/20	0.160413	0.447197	-1.84927	3.38417	NANS
epithelial cilium movement (GO:0003351)	1/16	0.130522	0.443262	-1.63475	3.32871	ADCY10
osteoclast differentiation (GO:0030316)	1/20	0.160413	0.447197	-1.81211	3.31618	MAPK14
regulation of catenin import into nucleus (GO:0035412)	1/20	0.160413	0.447197	-1.80305	3.29959	EGFR
regulation of myotube differentiation (GO:0010830)	1/20	0.160413	0.447197	-1.8008	3.29548	MAPK14
mammary gland development (GO:0030879)	1/25	0.196344	0.452629	-2.02024	3.28873	ARHGAP35
peptidyl-lysine trimethylation (GO:0018023)	1/18	0.145597	0.443262	-1.70443	3.28429	CTR9
negative regulation of protein dephosphorylation (GO:0035308)	1/19	0.153037	0.443391	-1.74876	3.28256	MASTL
negative regulation of phosphoprotein phosphatase activity (GO:0032515)	1/18	0.145597	0.443262	-1.7016	3.27883	MASTL
regulation of response to cytokine stimulus (GO:0060759)	1/21	0.167724	0.451819	-1.82826	3.26424	ELF1
regulation of protein complex assembly (GO:0043254)	2/74	0.135764	0.443262	-1.63035	3.25554	HSPA8;EIF2AK2
vesicle-mediated transport between endosomal compartments (GO:0098927)	1/24	0.189282	0.452629	-1.94938	3.24478	AKTIP
viral entry into host cell (GO:0046718)	1/18	0.145597	0.443262	-1.67064	3.21918	WWP1
interleukin-6-mediated signaling pathway (GO:0070102)	1/15	0.122885	0.443262	-1.53409	3.21624	CTR9
positive regulation of peptidyl-serine phosphorylation (GO:0033138)	2/84	0.165954	0.451819	-1.77615	3.19004	TBK1;EGFR
protein glycosylation (GO:0006486)	3/131	0.106328	0.443262	-1.42241	3.18795	B3GALNT1;B3GALT1;ST3GAL4
positive regulation of cyclase activity (GO:0031281)	1/13	0.107411	0.443262	-1.42863	3.18741	MAPK14
TOR signaling (GO:0031929)	1/24	0.189282	0.452629	-1.91201	3.18258	LARP1
posttranscriptional gene silencing by RNA (GO:0035194)	1/19	0.153037	0.443391	-1.69286	3.17762	CNOT8
positive regulation of nervous system development (GO:0051962)	2/53	0.0777448	0.443262	-1.23945	3.16597	ADGRL1;IL1RAP
non-motile cilium assembly (GO:1905515)	1/22	0.174973	0.452565	-1.81503	3.16383	CSNK1D
protein localization to centrosome (GO:0071539)	1/19	0.153037	0.443391	-1.6835	3.16005	CSNK1D
dorsal/ventral pattern formation (GO:0009953)	1/21	0.167724	0.451819	-1.75575	3.13477	AIDA
response to interferon-alpha (GO:0035455)	1/18	0.145597	0.443262	-1.61925	3.12016	EIF2AK2
cellular response to unfolded protein (GO:0034620)	1/23	0.182158	0.452565	-1.82878	3.11419	HSPA8
positive regulation of DNA biosynthetic process (GO:2000573)	2/56	0.0854529	0.443262	-1.26342	3.10774	XRCC5;TCP1
nucleotide-excision repair, preincision complex stabilization (GO:0006293)	1/22	0.174973	0.452565	-1.78013	3.103	XPA
regulation of ERBB signaling pathway (GO:1901184)	1/23	0.182158	0.452565	-1.81236	3.08623	EGFR
early endosome to late endosome transport (GO:0045022)	1/23	0.182158	0.452565	-1.80348	3.0711	AKTIP
ammonium transport (GO:0015696)	1/24	0.189282	0.452629	-1.84271	3.06723	SLC18A2
wound healing, spreading of cells (GO:0044319)	1/21	0.167724	0.451819	-1.709	3.05131	ARHGAP35
regulation of spindle organization (GO:0090224)	1/19	0.153037	0.443391	-1.62322	3.04691	BORA
negative regulation of myeloid cell differentiation (GO:0045638)	1/23	0.182158	0.452565	-1.78673	3.04259	CTR9
positive regulation of gene silencing by miRNA (GO:2000637)	1/21	0.167724	0.451819	-1.70261	3.03989	EGFR
inositol phosphate-mediated signaling (GO:0048016)	1/21	0.167724	0.451819	-1.70107	3.03714	PPP3CC
regulation of nuclear division (GO:0051783)	1/22	0.174973	0.452565	-1.73468	3.02376	BORA
activation of phospholipase C activity (GO:0007202)	1/23	0.182158	0.452565	-1.77519	3.02294	EGFR
protein sumoylation (GO:0016925)	2/69	0.121187	0.443262	-1.42654	3.01061	SENP5;UBE2I
positive regulation of cellular component organization (GO:0051130)	3/107	0.0667481	0.443262	-1.10775	2.99849	HAS3;ADGRL1;IL1RAP
negative regulation of cellular carbohydrate metabolic process (GO:0010677)	1/18	0.145597	0.443262	-1.55361	2.99366	ACTN3
sialylation (GO:0097503)	1/17	0.138092	0.443262	-1.51196	2.99342	ST3GAL4
phospholipid translocation (GO:0045332)	1/22	0.174973	0.452565	-1.71536	2.99008	ATP9B
cellular response to interleukin-6 (GO:0071354)	1/24	0.189282	0.452629	-1.79013	2.97971	CTR9
protein O-linked glycosylation (GO:0006493)	3/116	0.0806563	0.443262	-1.18226	2.9764	B3GALNT1;B3GALT1;ST3GAL4
positive regulation of ATP metabolic process (GO:1903580)	1/24	0.189282	0.452629	-1.76695	2.94113	ACTN3
positive regulation of syncytium formation by plasma membrane fusion (GO:0060143)	1/16	0.130522	0.443262	-1.43912	2.93036	MAPK14
positive regulation of proteasomal protein catabolic process (GO:1901800)	2/74	0.135764	0.443262	-1.46632	2.92801	RNF144B;CSNK1D
STAT cascade (GO:0097696)	1/23	0.182158	0.452565	-1.70384	2.90144	CTR9
cortical actin cytoskeleton organization (GO:0030866)	1/22	0.174973	0.452565	-1.663	2.89882	FMNL2
nucleotide-excision repair, DNA duplex unwinding (GO:0000717)	1/23	0.182158	0.452565	-1.6889	2.87599	XPA
cellular polysaccharide biosynthetic process (GO:0033692)	1/20	0.160413	0.447197	-1.57013	2.87335	HAS3
mesoderm development (GO:0007498)	1/22	0.174973	0.452565	-1.64797	2.87261	GDF11
regulation of cytokine production involved in inflammatory response (GO:1900015)	1/23	0.182158	0.452565	-1.68334	2.86652	MAPK14
protein targeting to lysosome (GO:0006622)	1/20	0.160413	0.447197	-1.56453	2.86309	HSPA8
nucleotide-excision repair, DNA damage recognition (GO:0000715)	1/24	0.189282	0.452629	-1.717	2.85798	XPA
negative regulation of cyclin-dependent protein serine/threonine kinase activity (GO:0045736)	1/25	0.196344	0.452629	-1.74233	2.83632	NR2F2
purine-containing compound biosynthetic process (GO:0072522)	1/23	0.182158	0.452565	-1.6579	2.82321	ADK
negative regulation of cyclin-dependent protein kinase activity (GO:1904030)	1/22	0.174973	0.452565	-1.6181	2.82055	NR2F2
positive regulation of erythrocyte differentiation (GO:0045648)	1/23	0.182158	0.452565	-1.65586	2.81972	MAPK14
positive regulation of interleukin-12 production (GO:0032735)	1/26	0.203344	0.457032	-1.76735	2.81513	MAPK14
positive regulation of mRNA catabolic process (GO:0061014)	1/24	0.189282	0.452629	-1.68272	2.80092	CNOT8
carboxylic acid catabolic process (GO:0046395)	1/29	0.223984	0.46567	-1.8675	2.79412	HEXB
regulation of GTPase activity (GO:0043087)	4/189	0.0832618	0.443262	-1.12023	2.78464	USP6NL;RSU1;FGD1;ARHGAP35
lipid translocation (GO:0034204)	1/23	0.182158	0.452565	-1.6323	2.77961	ATP9B
regulation of translation (GO:0006417)	4/214	0.116972	0.443262	-1.28301	2.75311	EIF5B;LARP1;EIF2AK2;CNOT8
nucleotide-excision repair, DNA incision, 3'-to lesion (GO:0006295)	1/23	0.182158	0.452565	-1.60952	2.74082	XPA
microtubule polymerization or depolymerization (GO:0031109)	1/24	0.189282	0.452629	-1.64592	2.73966	CKAP5
regulation of viral genome replication (GO:0045069)	2/64	0.107037	0.443262	-1.22043	2.72714	LARP1;EIF2AK2
regulation of membrane protein ectodomain proteolysis (GO:0051043)	1/23	0.182158	0.452565	-1.60031	2.72514	TIMP3
RNA splicing, via transesterification reactions (GO:0000375)	1/26	0.203344	0.457032	-1.71085	2.72513	WDR83
regulation of transcription elongation from RNA polymerase II promoter (GO:0034243)	1/24	0.189282	0.452629	-1.63685	2.72457	CTR9
chaperone mediated protein folding requiring cofactor (GO:0051085)	1/25	0.196344	0.452629	-1.66844	2.71603	HSPA8
regulation of protein phosphorylation (GO:0001932)	5/262	0.0791854	0.443262	-1.05944	2.6867	GDF11;AKTIP;FN1;CSNK1D;EGFR
regulation of DNA replication (GO:0006275)	2/62	0.101512	0.443262	-1.17384	2.68525	ESCO1;EGFR
positive regulation of nucleic acid-templated transcription (GO:1903508)	7/503	0.149971	0.443391	-1.41427	2.68332	IVNS1ABP;ELF1;FHL2;HAS3;WAC;NR2F2;EGFR
regulation of cellular senescence (GO:2000772)	1/25	0.196344	0.452629	-1.6397	2.66925	AKT3
protein maturation (GO:0051604)	2/84	0.165954	0.451819	-1.48612	2.66913	POP5;PCSK4
positive regulation of proteasomal ubiquitin-dependent protein catabolic process (GO:0032436)	2/71	0.12697	0.443262	-1.29264	2.66776	RNF144B;CSNK1D
cAMP metabolic process (GO:0046058)	1/25	0.196344	0.452629	-1.62714	2.6488	ADCY10
positive regulation of histone methylation (GO:0031062)	1/25	0.196344	0.452629	-1.62241	2.6411	CTR9
cellular nitrogen compound biosynthetic process (GO:0044271)	1/24	0.189282	0.452629	-1.5852	2.63859	CPS1
triglyceride catabolic process (GO:0019433)	1/23	0.182158	0.452565	-1.54543	2.63168	CPS1
positive regulation of interferon-beta production (GO:0032728)	1/27	0.210284	0.46466	-1.68379	2.62553	TBK1
NAD metabolic process (GO:0019674)	1/24	0.189282	0.452629	-1.56578	2.60626	KMO
negative regulation of endothelial cell proliferation (GO:0001937)	1/31	0.237448	0.46567	-1.81226	2.60568	NR2F2
macromolecule modification (GO:0043412)	1/25	0.196344	0.452629	-1.59493	2.59638	ST3GAL4
regulation of peptidyl-serine phosphorylation (GO:0033135)	2/87	0.175228	0.452565	-1.4865	2.58899	TBK1;EGFR
regulation of monooxygenase activity (GO:0032768)	1/24	0.189282	0.452629	-1.55054	2.58091	EGFR
positive regulation of protein phosphorylation (GO:0001934)	6/413	0.152045	0.443391	-1.36671	2.5743	GDF11;TBK1;XRCC5;AKTIP;CSNK1D;EGFR
cellular response to epidermal growth factor stimulus (GO:0071364)	1/26	0.203344	0.457032	-1.6078	2.56099	EGFR
cytoskeleton organization (GO:0007010)	3/127	0.0991962	0.443262	-1.1053	2.55397	FMNL2;ABI2;FGD1
regulation of glucose metabolic process (GO:0010906)	1/26	0.203344	0.457032	-1.5968	2.54347	SIK3
retrograde vesicle-mediated transport, Golgi to ER (GO:0006890)	2/81	0.156771	0.447197	-1.37154	2.54142	COPG2;ATP9B
cellular response to vascular endothelial growth factor stimulus (GO:0035924)	1/26	0.203344	0.457032	-1.57785	2.51329	MAPK14
regulation of protein polymerization (GO:0032271)	1/31	0.237448	0.46567	-1.74612	2.51058	FCHSD2
divalent inorganic cation homeostasis (GO:0072507)	1/24	0.189282	0.452629	-1.49791	2.49329	CNNM2
glycogen biosynthetic process (GO:0005978)	1/19	0.153037	0.443391	-1.32816	2.49305	PER2
cellular senescence (GO:0090398)	1/25	0.196344	0.452629	-1.52858	2.48836	MAPK14
lymphocyte differentiation (GO:0030098)	2/74	0.135764	0.443262	-1.24213	2.48034	BLK;CR2
B cell proliferation (GO:0042100)	1/30	0.230745	0.46567	-1.66813	2.44622	CR2
signal transduction in response to DNA damage (GO:0042770)	1/26	0.203344	0.457032	-1.53558	2.44596	MAPK14
positive regulation of DNA-templated transcription, elongation (GO:0032786)	1/25	0.196344	0.452629	-1.49451	2.4329	CTR9
cellular response to topologically incorrect protein (GO:0035967)	1/28	0.217164	0.46567	-1.58579	2.42167	HSPA8
TRIF-dependent toll-like receptor signaling pathway (GO:0035666)	1/30	0.230745	0.46567	-1.63704	2.40062	TBK1
regulation of transcription regulatory region DNA binding (GO:2000677)	1/27	0.210284	0.46466	-1.53858	2.3991	PER2
regulation of chromosome organization (GO:0033044)	1/25	0.196344	0.452629	-1.47005	2.39307	XRCC5
response to lipopolysaccharide (GO:0032496)	3/156	0.154979	0.446322	-1.28234	2.39087	CPS1;CTR9;MAPK14
dicarboxylic acid transport (GO:0006835)	1/30	0.230745	0.46567	-1.61838	2.37326	SLC25A21
response to gamma radiation (GO:0010332)	1/27	0.210284	0.46466	-1.51968	2.36963	XRCC5
protein alkylation (GO:0008213)	1/30	0.230745	0.46567	-1.60845	2.3587	HSPA8
transcription from RNA polymerase III promoter (GO:0006383)	1/28	0.217164	0.46567	-1.54163	2.35422	IVNS1ABP
cyclic purine nucleotide metabolic process (GO:0052652)	1/31	0.237448	0.46567	-1.62986	2.34343	ADCY10
regulation of protein insertion into mitochondrial membrane involved in apoptotic signaling pathway (GO:1900739)	1/31	0.237448	0.46567	-1.62701	2.33933	PPP3CC
positive regulation of sprouting angiogenesis (GO:1903672)	1/29	0.223984	0.46567	-1.5615	2.33629	AKT3
protein localization to cilium (GO:0061512)	1/23	0.182158	0.452565	-1.36612	2.32633	CSNK1D
regulation of immune effector process (GO:0002697)	2/115	0.264414	0.482996	-1.74595	2.32253	CR2;C8B
regulation of blood vessel diameter (GO:0097746)	1/28	0.217164	0.46567	-1.51939	2.32026	PER2
substrate adhesion-dependent cell spreading (GO:0034446)	1/33	0.250679	0.474164	-1.67467	2.31705	FN1
protein localization to chromosome (GO:0034502)	1/28	0.217164	0.46567	-1.50904	2.30445	XRCC5
regulation of myoblast differentiation (GO:0045661)	1/30	0.230745	0.46567	-1.5709	2.30364	MAPK14
protein ubiquitination involved in ubiquitin-dependent protein catabolic process (GO:0042787)	2/71	0.12697	0.443262	-1.11501	2.30116	RNF144B;WWP1
chromatin remodeling at centromere (GO:0031055)	1/33	0.250679	0.474164	-1.66308	2.301	CENPO
protein localization to Golgi apparatus (GO:0034067)	1/24	0.189282	0.452629	-1.37405	2.28712	CSNK1D
negative regulation of Notch signaling pathway (GO:0045746)	1/30	0.230745	0.46567	-1.55905	2.28626	EGFR
carbohydrate derivative biosynthetic process (GO:1901137)	1/30	0.230745	0.46567	-1.55819	2.285	ST3GAL4
regulation of cilium assembly (GO:1902017)	1/28	0.217164	0.46567	-1.49304	2.28002	ARHGAP35
regulation of hydrolase activity (GO:0051336)	2/81	0.156771	0.447197	-1.22828	2.27597	FGD1;ARHGAP35
cellular response to ketone (GO:1901655)	1/29	0.223984	0.46567	-1.52012	2.27437	LARP1
negative regulation of proteasomal ubiquitin-dependent protein catabolic process (GO:0032435)	1/25	0.196344	0.452629	-1.39489	2.27072	WAC
positive regulation of fibroblast proliferation (GO:0048146)	1/29	0.223984	0.46567	-1.51115	2.26095	FN1
response to cytokine (GO:0034097)	3/139	0.121169	0.443262	-1.06991	2.25813	TBK1;TIMP3;EIF2AK2
nucleotide-excision repair, preincision complex assembly (GO:0006294)	1/30	0.230745	0.46567	-1.53645	2.25311	XPA
regulation of telomere maintenance (GO:0032204)	1/26	0.203344	0.457032	-1.41028	2.24637	XRCC5
positive regulation of cyclin-dependent protein serine/threonine kinase activity (GO:0045737)	1/31	0.237448	0.46567	-1.55861	2.24098	EGFR
regulation of protein transport (GO:0051223)	1/28	0.217164	0.46567	-1.45982	2.2293	HSPA8
CENP-A containing nucleosome assembly (GO:0034080)	1/31	0.237448	0.46567	-1.54305	2.21861	CENPO
MyD88-independent toll-like receptor signaling pathway (GO:0002756)	1/31	0.237448	0.46567	-1.54212	2.21728	TBK1
regulation of cell migration involved in sprouting angiogenesis (GO:0090049)	1/31	0.237448	0.46567	-1.53624	2.20882	AKT3
cellular response to cadmium ion (GO:0071276)	1/30	0.230745	0.46567	-1.50281	2.20378	EGFR
CENP-A containing chromatin organization (GO:0061641)	1/31	0.237448	0.46567	-1.52799	2.19695	CENPO
lytic vacuole organization (GO:0080171)	1/29	0.223984	0.46567	-1.46594	2.19331	AKTIP
positive regulation of phosphate metabolic process (GO:0045937)	1/29	0.223984	0.46567	-1.46593	2.19329	EGFR
viral genome replication (GO:0019079)	1/23	0.182158	0.452565	-1.27299	2.16775	UBP1
cortical cytoskeleton organization (GO:0030865)	1/30	0.230745	0.46567	-1.47003	2.15572	FMNL2
regulation of endothelial cell proliferation (GO:0001936)	2/80	0.153732	0.444063	-1.14495	2.14398	AKT3;NR2F2
cellular response to estradiol stimulus (GO:0071392)	1/21	0.167724	0.451819	-1.19702	2.1372	EGFR
positive regulation of myeloid cell differentiation (GO:0045639)	1/30	0.230745	0.46567	-1.4293	2.09599	MAPK14
protein depolymerization (GO:0051261)	1/26	0.203344	0.457032	-1.31569	2.0957	CKAP5
cellular amino acid biosynthetic process (GO:0008652)	1/29	0.223984	0.46567	-1.40018	2.09493	PAH
regulation of cell morphogenesis (GO:0022604)	1/29	0.223984	0.46567	-1.39563	2.08811	FMNL2
cellular response to lipopolysaccharide (GO:0071222)	2/92	0.19086	0.452629	-1.26054	2.08771	CTR9;MAPK14
negative regulation of proteasomal protein catabolic process (GO:1901799)	1/29	0.223984	0.46567	-1.38889	2.07802	WAC
nuclear-transcribed mRNA poly(A) tail shortening (GO:0000289)	1/30	0.230745	0.46567	-1.41435	2.07406	CNOT8
regulation of protein catabolic process (GO:0042176)	2/92	0.19086	0.452629	-1.24454	2.06123	WWP1;EGFR
aminoglycan catabolic process (GO:0006026)	1/33	0.250679	0.474164	-1.48527	2.05499	IDUA
histone H3-K4 methylation (GO:0051568)	1/24	0.189282	0.452629	-1.23111	2.04921	CTR9
negative regulation of transcription, DNA-templated (GO:0045892)	10/814	0.172824	0.452565	-1.16522	2.04552	PER2;HSPA8;UBE2I;XRCC5;CTR9;FHL2;WWP1;UBP1;NR2F2;ARHGAP35
regulation of vasoconstriction (GO:0019229)	1/30	0.230745	0.46567	-1.38545	2.03167	PER2
positive regulation of synapse assembly (GO:0051965)	1/27	0.210284	0.46466	-1.30134	2.02918	IL1RAP
positive regulation of insulin secretion (GO:0032024)	1/32	0.244092	0.469131	-1.43757	2.02727	BLK
acylglycerol catabolic process (GO:0046464)	1/31	0.237448	0.46567	-1.40439	2.01924	CPS1
lysosome organization (GO:0007040)	1/32	0.244092	0.469131	-1.43107	2.01811	AKTIP
positive regulation of cellular component biogenesis (GO:0044089)	2/88	0.178338	0.452565	-1.16841	2.01443	HAS3;IL1RAP
cellular response to alcohol (GO:0097306)	1/29	0.223984	0.46567	-1.34579	2.01355	LARP1
regulation of nervous system development (GO:0051960)	1/26	0.203344	0.457032	-1.25711	2.0024	PER2
keratan sulfate biosynthetic process (GO:0018146)	1/30	0.230745	0.46567	-1.34857	1.9776	ST3GAL4
positive regulation of DNA replication (GO:0045740)	1/36	0.2701	0.483807	-1.50983	1.97631	EGFR
coenzyme biosynthetic process (GO:0009108)	1/30	0.230745	0.46567	-1.34614	1.97403	MAT1A
'de novo' posttranslational protein folding (GO:0051084)	1/31	0.237448	0.46567	-1.36786	1.96672	HSPA8
positive regulation of phospholipase C activity (GO:0010863)	1/31	0.237448	0.46567	-1.36783	1.96668	EGFR
gene silencing by miRNA (GO:0035195)	1/32	0.244092	0.469131	-1.39418	1.96609	CNOT8
regulation of cell cycle G2/M phase transition (GO:1902749)	2/85	0.169036	0.452565	-1.10399	1.9625	CSNK1D;CKAP5
nucleotide-excision repair, DNA incision, 5'-to lesion (GO:0006296)	1/38	0.282768	0.488602	-1.55113	1.95928	XPA
histone exchange (GO:0043486)	1/37	0.276461	0.483807	-1.51816	1.95188	CENPO
regulation of humoral immune response (GO:0002920)	2/114	0.26119	0.482579	-1.45349	1.95132	CR2;C8B
positive regulation of stress-activated MAPK cascade (GO:0032874)	2/81	0.156771	0.447197	-1.04987	1.94539	TAOK3;EIF2AK2
regulation of protein activation cascade (GO:2000257)	2/109	0.245083	0.469131	-1.37161	1.92871	CR2;C8B
negative regulation of endothelial cell migration (GO:0010596)	1/35	0.263682	0.482579	-1.44669	1.92845	NR2F2
cellular response to DNA damage stimulus (GO:0006974)	5/330	0.161225	0.448159	-1.05089	1.91782	TAOK3;XPA;WAC;MASTL;MAPK14
positive regulation of mitochondrial outer membrane permeabilization involved in apoptotic signaling pathway (GO:1901030)	1/38	0.282768	0.488602	-1.51706	1.91625	PPP3CC
regulation of cell-substrate adhesion (GO:0010810)	1/34	0.257209	0.478958	-1.40805	1.91195	RSU1
regulation of interferon-beta production (GO:0032648)	1/35	0.263682	0.482579	-1.42585	1.90067	TBK1
fat-soluble vitamin metabolic process (GO:0006775)	1/27	0.210284	0.46466	-1.21871	1.90033	UBE2I
response to cadmium ion (GO:0046686)	1/32	0.244092	0.469131	-1.3441	1.89546	EGFR
regulation of phosphoprotein phosphatase activity (GO:0043666)	1/36	0.2701	0.483807	-1.44443	1.8907	MASTL
cellular response to molecule of bacterial origin (GO:0071219)	2/85	0.169036	0.452565	-1.05688	1.87876	CTR9;MAPK14
intra-Golgi vesicle-mediated transport (GO:0006891)	1/34	0.257209	0.478958	-1.36121	1.84835	COPG2
positive regulation of viral genome replication (GO:0045070)	1/32	0.244092	0.469131	-1.30884	1.84574	LARP1
regulation of nitric-oxide synthase activity (GO:0050999)	1/37	0.276461	0.483807	-1.43485	1.84477	EGFR
purine ribonucleoside triphosphate metabolic process (GO:0009205)	1/33	0.250679	0.474164	-1.32569	1.8342	HSPA8
protein modification by small protein conjugation (GO:0032446)	6/399	0.135711	0.443262	-0.913169	1.82381	KLHL29;SENP5;UBE2I;CTR9;WAC;WWP1
endosome organization (GO:0007032)	1/37	0.276461	0.483807	-1.41799	1.82308	AKTIP
centromere complex assembly (GO:0034508)	1/37	0.276461	0.483807	-1.41092	1.814	CENPO
actin polymerization or depolymerization (GO:0008154)	1/37	0.276461	0.483807	-1.40779	1.80997	ABI2
regulation of muscle cell differentiation (GO:0051147)	1/37	0.276461	0.483807	-1.39751	1.79676	MAPK14
endoderm formation (GO:0001706)	1/37	0.276461	0.483807	-1.392	1.78968	FN1
regulation of cell morphogenesis involved in differentiation (GO:0010769)	1/37	0.276461	0.483807	-1.38449	1.78002	ARHGAP35
positive regulation of cytokinesis (GO:0032467)	1/35	0.263682	0.482579	-1.3332	1.77716	CIT
glycogen metabolic process (GO:0005977)	1/34	0.257209	0.478958	-1.28585	1.74602	PER2
histone deacetylation (GO:0016575)	1/37	0.276461	0.483807	-1.35234	1.73868	PER2
regulation of defense response to virus by virus (GO:0050690)	1/29	0.223984	0.46567	-1.15825	1.73295	EIF2AK2
positive regulation of muscle cell differentiation (GO:0051149)	1/35	0.263682	0.482579	-1.29946	1.73219	MAPK14
muscle filament sliding (GO:0030049)	1/39	0.289019	0.492308	-1.39151	1.72723	ACTN3
exonucleolytic nuclear-transcribed mRNA catabolic process involved in deadenylation-dependent decay (GO:0043928)	1/34	0.257209	0.478958	-1.26738	1.72094	CNOT8
regulation of synapse assembly (GO:0051963)	1/36	0.2701	0.483807	-1.31421	1.72025	IL1RAP
RNA splicing (GO:0008380)	2/107	0.23865	0.467072	-1.19997	1.71927	IVNS1ABP;WDR83
entry into host cell (GO:0030260)	1/34	0.257209	0.478958	-1.26422	1.71664	WWP1
establishment or maintenance of epithelial cell apical/basal polarity (GO:0045197)	1/34	0.257209	0.478958	-1.2611	1.71241	PARD3B
positive regulation of protein insertion into mitochondrial membrane involved in apoptotic signaling pathway (GO:1900740)	1/31	0.237448	0.46567	-1.18135	1.69855	PPP3CC
T cell differentiation (GO:0030217)	1/39	0.289019	0.492308	-1.35858	1.68636	BLK
actin-myosin filament sliding (GO:0033275)	1/39	0.289019	0.492308	-1.35223	1.67847	ACTN3
DNA-templated transcription, elongation (GO:0006354)	2/109	0.245083	0.469131	-1.19313	1.67773	CTR9;NELFE
transcription elongation from RNA polymerase II promoter (GO:0006368)	2/96	0.203496	0.457032	-1.0516	1.67426	CTR9;NELFE
positive regulation of DNA repair (GO:0045739)	1/39	0.289019	0.492308	-1.34264	1.66657	EGFR
positive regulation of kinase activity (GO:0033674)	2/114	0.26119	0.482579	-1.23879	1.66309	XRCC5;EGFR
organophosphate biosynthetic process (GO:0090407)	1/37	0.276461	0.483807	-1.29331	1.66279	CPS1
regulation of mitotic spindle organization (GO:0060236)	1/36	0.2701	0.483807	-1.26556	1.65657	BORA
alpha-amino acid catabolic process (GO:1901606)	1/40	0.295217	0.492343	-1.35019	1.64729	KMO
negative regulation of epithelial cell migration (GO:0010633)	1/36	0.2701	0.483807	-1.25727	1.64572	NR2F2
positive regulation of protein localization to membrane (GO:1905477)	2/96	0.203496	0.457032	-1.02934	1.63882	PPP3CC;EGFR
base-excision repair (GO:0006284)	1/38	0.282768	0.488602	-1.2972	1.63854	XPA
lymphocyte proliferation (GO:0046651)	1/37	0.276461	0.483807	-1.27252	1.63606	CR2
positive regulation of RNA metabolic process (GO:0051254)	1/36	0.2701	0.483807	-1.24345	1.62763	EGFR
negative regulation of DNA binding (GO:0043392)	1/35	0.263682	0.482579	-1.21068	1.61385	PER2
regulation of DNA repair (GO:0006282)	1/38	0.282768	0.488602	-1.2752	1.61074	EGFR
regulation of blood circulation (GO:1903522)	1/37	0.276461	0.483807	-1.25191	1.60957	PER2
gluconeogenesis (GO:0006094)	1/42	0.307452	0.494708	-1.36416	1.60894	PER2
response to estradiol (GO:0032355)	1/31	0.237448	0.46567	-1.11746	1.60669	EGFR
regulation of protein localization (GO:0032880)	1/42	0.307452	0.494708	-1.36148	1.60578	BORA
sodium ion transmembrane transport (GO:0035725)	1/37	0.276461	0.483807	-1.24862	1.60534	SLC17A1
protein acetylation (GO:0006473)	1/34	0.257209	0.478958	-1.18068	1.6032	ESCO1
cellular response to amino acid starvation (GO:0034198)	1/40	0.295217	0.492343	-1.30834	1.59624	EIF2AK2
regulation of protein modification process (GO:0031399)	1/43	0.313489	0.500227	-1.37168	1.59113	FN1
cell cycle G1/S phase transition (GO:0044843)	2/93	0.19401	0.452629	-0.96492	1.58232	ORC4;ORC3
intraciliary transport involved in cilium assembly (GO:0035735)	1/41	0.301361	0.492343	-1.31846	1.58142	WDR19
monocarboxylic acid metabolic process (GO:0032787)	2/109	0.245083	0.469131	-1.12028	1.57529	PER2;AGXT
glycosaminoglycan biosynthetic process (GO:0006024)	2/100	0.216222	0.46567	-1.02514	1.56995	HAS3;ST3GAL4
JAK-STAT cascade (GO:0007259)	1/41	0.301361	0.492343	-1.30446	1.56463	CTR9
positive regulation of cell division (GO:0051781)	1/42	0.307452	0.494708	-1.3195	1.55627	CIT
regulation of lipid metabolic process (GO:0019216)	2/101	0.219416	0.46567	-1.02115	1.54887	TIAM2;FHL2
positive regulation of protein localization to nucleus (GO:1900182)	1/43	0.313489	0.500227	-1.33524	1.54886	TCP1
negative regulation of cytokine-mediated signaling pathway (GO:0001960)	1/41	0.301361	0.492343	-1.29005	1.54735	CCDC3
cognition (GO:0050890)	1/41	0.301361	0.492343	-1.28799	1.54488	ST3GAL4
ciliary basal body-plasma membrane docking (GO:0097711)	2/97	0.20667	0.461996	-0.977289	1.54083	CSNK1D;CKAP5
DNA duplex unwinding (GO:0032508)	1/42	0.307452	0.494708	-1.29999	1.53325	XPA
ERBB2 signaling pathway (GO:0038128)	1/40	0.295217	0.492343	-1.25018	1.52527	EGFR
positive regulation of peptide hormone secretion (GO:0090277)	1/40	0.295217	0.492343	-1.24916	1.52403	BLK
nuclear-transcribed mRNA catabolic process, exonucleolytic (GO:0000291)	1/36	0.2701	0.483807	-1.16238	1.52151	CNOT8
response to UV (GO:0009411)	2/99	0.213033	0.46567	-0.981187	1.51722	XPA;EGFR
anatomical structure homeostasis (GO:0060249)	1/36	0.2701	0.483807	-1.15706	1.51456	XRCC5
regulation of erythrocyte differentiation (GO:0045646)	1/33	0.250679	0.474164	-1.09033	1.50856	MAPK14
regulation of transcription, DNA-templated (GO:0006355)	17/1599	0.228019	0.46567	-1.01964	1.50736	IVNS1ABP;HSPA8;UBE2I;XRCC5;CTR9;FHL2;WWP1;UBP1;NR2F2;MAPK14;EGFR;ARHGAP35;PER2;ELF1;HAS3;WAC;CNOT8
nucleotide-excision repair (GO:0006289)	2/109	0.245083	0.469131	-1.06652	1.4997	UBE2I;XPA
regulation of insulin secretion (GO:0050796)	2/99	0.213033	0.46567	-0.967359	1.49583	BLK;PER2
positive regulation of viral life cycle (GO:1903902)	1/45	0.325409	0.506638	-1.32898	1.49201	LARP1
protein polymerization (GO:0051258)	1/46	0.331291	0.511565	-1.34622	1.48725	CKAP5
regulation of protein ubiquitination (GO:0031396)	2/102	0.222613	0.46567	-0.989554	1.48663	PER2;FANCI
androgen receptor signaling pathway (GO:0030521)	1/41	0.301361	0.492343	-1.22882	1.4739	FHL2
positive regulation of protein modification process (GO:0031401)	3/164	0.171811	0.452565	-0.835248	1.47117	AKTIP;CSNK1D;EGFR
glycolipid biosynthetic process (GO:0009247)	1/43	0.313489	0.500227	-1.26417	1.46642	ST3GAL4
telomere organization (GO:0032200)	1/42	0.307452	0.494708	-1.24251	1.46546	XRCC5
positive regulation of gene expression (GO:0010628)	9/772	0.230838	0.46567	-0.998504	1.46385	IVNS1ABP;ELF1;FN1;FHL2;HAS3;WAC;NR2F2;MAPK14;EGFR
regulation of complement activation (GO:0030449)	2/110	0.248302	0.474164	-1.037	1.44466	CR2;C8B
negative regulation of epidermal growth factor receptor signaling pathway (GO:0042059)	1/41	0.301361	0.492343	-1.20273	1.44262	EGFR
positive regulation of reactive oxygen species metabolic process (GO:2000379)	1/40	0.295217	0.492343	-1.18216	1.44229	MAPK14
positive regulation of epithelial cell proliferation (GO:0050679)	2/108	0.241866	0.469131	-1.01574	1.44172	AKT3;EGFR
negative regulation of ERBB signaling pathway (GO:1901185)	1/44	0.319475	0.504739	-1.26272	1.44086	EGFR
signal transduction by p53 class mediator (GO:0072331)	1/40	0.295217	0.492343	-1.17916	1.43862	ZMAT1
negative regulation of protein modification by small protein conjugation or removal (GO:1903321)	1/47	0.337122	0.512361	-1.31853	1.43365	PER2
hexose biosynthetic process (GO:0019319)	1/45	0.325409	0.506638	-1.26864	1.42427	PER2
organonitrogen compound biosynthetic process (GO:1901566)	3/182	0.211384	0.46567	-0.905638	1.40743	CPS1;PAH;ST3GAL4
regulation of smooth muscle cell proliferation (GO:0048660)	1/45	0.325409	0.506638	-1.2479	1.40098	XRCC5
negative regulation of protein metabolic process (GO:0051248)	1/44	0.319475	0.504739	-1.22557	1.39847	EGFR
positive regulation of blood vessel endothelial cell migration (GO:0043536)	1/46	0.331291	0.511565	-1.26007	1.39208	AKT3
positive regulation of chemokine production (GO:0032722)	1/35	0.263682	0.482579	-1.04419	1.39191	EIF2AK2
cellular response to heat (GO:0034605)	1/48	0.342903	0.51705	-1.29965	1.39103	HSPA8
negative regulation of cytokine secretion (GO:0050710)	1/41	0.301361	0.492343	-1.15793	1.38888	FN1
purine ribonucleoside monophosphate metabolic process (GO:0009167)	1/40	0.295217	0.492343	-1.13455	1.3842	HSPA8
glycoprotein metabolic process (GO:0009100)	1/49	0.348633	0.520777	-1.30681	1.37704	ST3GAL4
negative regulation of ERK1 and ERK2 cascade (GO:0070373)	1/41	0.301361	0.492343	-1.14683	1.37556	TIMP3
response to unfolded protein (GO:0006986)	1/44	0.319475	0.504739	-1.20196	1.37153	HSPA8
regulation of acute inflammatory response (GO:0002673)	2/122	0.28697	0.492308	-1.09545	1.36754	CR2;C8B
organic hydroxy compound biosynthetic process (GO:1901617)	1/50	0.354314	0.523555	-1.31777	1.36728	PER2
positive regulation of protein localization to plasma membrane (GO:1903078)	1/44	0.319475	0.504739	-1.19726	1.36617	EGFR
negative regulation of proteolysis (GO:0045861)	1/42	0.307452	0.494708	-1.15509	1.36236	TIMP3
positive regulation of viral process (GO:0048524)	1/45	0.325409	0.506638	-1.21326	1.3621	NELFE
cellular response to lipid (GO:0071396)	3/179	0.204648	0.458545	-0.856031	1.35806	CTR9;MAPK14;EGFR
nucleotide-excision repair, DNA incision (GO:0033683)	1/41	0.301361	0.492343	-1.12534	1.34979	XPA
cytosolic transport (GO:0016482)	2/119	0.277307	0.484404	-1.05191	1.34921	DOPEY1;AKTIP
positive regulation of response to DNA damage stimulus (GO:2001022)	1/50	0.354314	0.523555	-1.30031	1.34917	EGFR
regulation of fibroblast proliferation (GO:0048145)	1/47	0.337122	0.512361	-1.23665	1.34463	FN1
regulation of protein binding (GO:0043393)	2/112	0.254744	0.478958	-0.982457	1.34351	AKTIP;AIDA
interleukin-12-mediated signaling pathway (GO:0035722)	1/47	0.337122	0.512361	-1.23076	1.33822	TCP1
positive regulation of phosphorylation (GO:0042327)	3/209	0.273796	0.483807	-1.02939	1.33344	AKTIP;CSNK1D;EGFR
protein methylation (GO:0006479)	1/47	0.337122	0.512361	-1.21179	1.3176	HSPA8
G1/S transition of mitotic cell cycle (GO:0000082)	2/106	0.235437	0.46567	-0.910161	1.31638	ORC4;ORC3
cellular response to starvation (GO:0009267)	2/108	0.241866	0.469131	-0.926197	1.31462	HSPA8;EIF2AK2
endosome to lysosome transport (GO:0008333)	1/49	0.348633	0.520777	-1.23978	1.3064	AKTIP
positive regulation of cytokine production (GO:0001819)	3/221	0.302185	0.49285	-1.08597	1.2996	TBK1;XRCC5;EIF2AK2
non-recombinational repair (GO:0000726)	1/50	0.354314	0.523555	-1.25254	1.2996	XRCC5
positive regulation of viral transcription (GO:0050434)	1/42	0.307452	0.494708	-1.10111	1.29869	NELFE
negative regulation of type I interferon production (GO:0032480)	1/45	0.325409	0.506638	-1.15126	1.29249	TBK1
double-strand break repair via nonhomologous end joining (GO:0006303)	1/51	0.359945	0.524601	-1.2603	1.28778	XRCC5
peptide cross-linking (GO:0018149)	1/48	0.342903	0.51705	-1.19243	1.27627	FN1
intrinsic apoptotic signaling pathway by p53 class mediator (GO:0072332)	1/44	0.319475	0.504739	-1.11501	1.27231	ZMAT1
intraciliary transport (GO:0042073)	1/47	0.337122	0.512361	-1.16448	1.26615	WDR19
amide biosynthetic process (GO:0043604)	1/45	0.325409	0.506638	-1.11998	1.25737	CPS1
DNA replication-independent nucleosome assembly (GO:0006336)	1/40	0.295217	0.492343	-1.02904	1.25548	CENPO
regulation of MAPK cascade (GO:0043408)	3/204	0.262051	0.482579	-0.934712	1.25178	GDF11;FN1;EGFR
regulation of metal ion transport (GO:0010959)	1/38	0.282768	0.488602	-0.983656	1.24249	IL16
nicotinamide nucleotide metabolic process (GO:0046496)	1/46	0.331291	0.511565	-1.11681	1.2338	KMO
ATP metabolic process (GO:0046034)	1/57	0.392724	0.549813	-1.31986	1.2336	HSPA8
cellular response to interleukin-12 (GO:0071349)	1/47	0.337122	0.512361	-1.12987	1.22852	TCP1
sphingolipid metabolic process (GO:0006665)	2/117	0.270861	0.483807	-0.933822	1.21971	B3GALNT1;HEXB
positive regulation of organelle assembly (GO:1902117)	1/48	0.342903	0.51705	-1.12897	1.20835	ARHGAP35
heterophilic cell-cell adhesion via plasma membrane cell adhesion molecules (GO:0007157)	1/48	0.342903	0.51705	-1.12316	1.20213	ADGRL1
regulation of mRNA stability (GO:0043488)	2/129	0.309455	0.496266	-1.02418	1.20131	HSPA8;LARP1
regulation of protein processing (GO:0070613)	2/129	0.309455	0.496266	-1.02213	1.19891	CR2;C8B
fatty acid oxidation (GO:0019395)	1/51	0.359945	0.524601	-1.17252	1.19809	ECHDC1
regulation of reactive oxygen species metabolic process (GO:2000377)	1/50	0.354314	0.523555	-1.14739	1.1905	MAPK14
DNA replication (GO:0006260)	2/121	0.28375	0.489419	-0.943931	1.18903	ORC4;ORC3
fatty acid beta-oxidation (GO:0006635)	1/51	0.359945	0.524601	-1.15301	1.17815	ECHDC1
neurogenesis (GO:0022008)	1/51	0.359945	0.524601	-1.15232	1.17744	CIT
regulation of blood vessel endothelial cell migration (GO:0043535)	1/51	0.359945	0.524601	-1.14759	1.17261	AKT3
platelet degranulation (GO:0002576)	2/125	0.29662	0.492343	-0.96455	1.17222	FN1;TIMP3
protein N-linked glycosylation via asparagine (GO:0018279)	1/45	0.325409	0.506638	-1.04326	1.17124	ST3GAL4
positive regulation of JUN kinase activity (GO:0043507)	1/51	0.359945	0.524601	-1.14539	1.17036	TAOK3
regulation of cellular component movement (GO:0051270)	1/47	0.337122	0.512361	-1.07524	1.16912	EGFR
positive regulation of protein localization to cell periphery (GO:1904377)	1/47	0.337122	0.512361	-1.06465	1.1576	EGFR
epidermal growth factor receptor signaling pathway (GO:0007173)	1/58	0.398022	0.553193	-1.25398	1.15523	EGFR
positive regulation of pathway-restricted SMAD protein phosphorylation (GO:0010862)	1/48	0.342903	0.51705	-1.07563	1.15126	GDF11
negative regulation of viral genome replication (GO:0045071)	1/51	0.359945	0.524601	-1.12016	1.14459	EIF2AK2
regulation of viral transcription (GO:0046782)	1/41	0.301361	0.492343	-0.953432	1.14359	NELFE
peptidyl-asparagine modification (GO:0018196)	1/46	0.331291	0.511565	-1.03101	1.13902	ST3GAL4
regulation of calcium ion transport (GO:0051924)	1/53	0.371062	0.533507	-1.14484	1.13498	IL16
regulation of phosphorylation (GO:0042325)	2/120	0.280529	0.488602	-0.891789	1.13353	FN1;EGFR
protein dephosphorylation (GO:0006470)	2/126	0.299832	0.492343	-0.922352	1.111	PPP3CC;MTMR7
positive regulation of developmental growth (GO:0048639)	1/52	0.365528	0.529908	-1.09973	1.10678	ACTN3
inorganic anion transport (GO:0015698)	1/45	0.325409	0.506638	-0.979232	1.09936	SLC17A1
dephosphorylation (GO:0016311)	2/125	0.29662	0.492343	-0.902968	1.09738	PPP3CC;MTMR7
sulfur compound biosynthetic process (GO:0044272)	2/123	0.290188	0.492343	-0.886102	1.09631	ST3GAL4;MAT1A
regulated exocytosis (GO:0045055)	2/149	0.372706	0.535068	-1.1094	1.09494	FN1;TIMP3
amino acid transport (GO:0006865)	1/49	0.348633	0.520777	-1.03749	1.09324	SLC16A10
vesicle-mediated transport (GO:0016192)	5/411	0.287693	0.492308	-0.874125	1.08904	USP6NL;HSPA8;AKTIP;CSNK1D;ATP9B
cell morphogenesis involved in differentiation (GO:0000904)	1/55	0.381987	0.541102	-1.12924	1.08674	FN1
negative regulation of protein ubiquitination (GO:0031397)	1/51	0.359945	0.524601	-1.05748	1.08054	PER2
Golgi organization (GO:0007030)	2/122	0.28697	0.492308	-0.855851	1.06842	USP6NL;CSNK1D
telomere maintenance (GO:0000723)	1/52	0.365528	0.529908	-1.06153	1.06834	XRCC5
cilium movement (GO:0003341)	1/50	0.354314	0.523555	-1.02164	1.06003	ADCY10
B cell differentiation (GO:0030183)	1/53	0.371062	0.533507	-1.044	1.035	CR2
regulation of axonogenesis (GO:0050770)	1/56	0.387379	0.547123	-1.07754	1.02189	ARHGAP35
regulation of glycolytic process (GO:0006110)	1/58	0.398022	0.553193	-1.10881	1.02149	ACTN3
DNA metabolic process (GO:0006259)	4/315	0.294123	0.492343	-0.834299	1.02098	ORC4;XRCC5;ORC3;XPA
regulation of tumor necrosis factor-mediated signaling pathway (GO:0010803)	1/57	0.392724	0.549813	-1.08947	1.01827	CCDC3
generation of neurons (GO:0048699)	2/131	0.315856	0.503165	-0.881839	1.01629	PER2;CIT
negative regulation of response to stimulus (GO:0048585)	2/128	0.30625	0.494708	-0.85435	1.011	AKT3;EGFR
negative regulation of cellular component organization (GO:0051129)	1/55	0.381987	0.541102	-1.04562	1.00627	HSPA8
metal ion homeostasis (GO:0055065)	1/46	0.331291	0.511565	-0.909445	1.00472	CNNM2
myeloid leukocyte differentiation (GO:0002573)	1/51	0.359945	0.524601	-0.982553	1.00398	MAPK14
regulation of cell cycle (GO:0051726)	3/216	0.290329	0.492343	-0.806951	0.997988	PER2;TAOK3;MASTL
regulation of epidermal growth factor receptor signaling pathway (GO:0042058)	1/59	0.403275	0.557263	-1.09474	0.994173	EGFR
cellular response to growth factor stimulus (GO:0071363)	2/140	0.344476	0.517794	-0.931163	0.992369	MAPK14;EGFR
positive regulation of protein import into nucleus (GO:0042307)	1/54	0.376549	0.53897	-1.00356	0.980181	EGFR
post-Golgi vesicle-mediated transport (GO:0006892)	1/59	0.403275	0.557263	-1.07542	0.976628	DOPEY1
anion transport (GO:0006820)	1/57	0.392724	0.549813	-1.03325	0.965728	SLC17A1
positive regulation of response to stimulus (GO:0048584)	1/55	0.381987	0.541102	-0.998988	0.961394	EGFR
chromosome organization (GO:0051276)	1/57	0.392724	0.549813	-1.02723	0.960102	XPA
cellular response to nutrient levels (GO:0031669)	1/55	0.381987	0.541102	-0.990382	0.953112	HSPA8
modification-dependent protein catabolic process (GO:0019941)	2/142	0.350787	0.52318	-0.901605	0.9445	RNF144B;UBE2I
I-kappaB kinase/NF-kappaB signaling (GO:0007249)	1/58	0.398022	0.553193	-1.01664	0.936579	TBK1
sodium ion transport (GO:0006814)	1/59	0.403275	0.557263	-1.01138	0.918476	SLC17A1
regulation of vesicle fusion (GO:0031338)	1/62	0.41876	0.568021	-1.03562	0.901467	USP6NL
regulation of translational initiation (GO:0006446)	1/63	0.423833	0.570864	-1.04831	0.899884	EIF5B
cellular response to organic cyclic compound (GO:0071407)	2/136	0.331797	0.511565	-0.810758	0.894454	LARP1;EGFR
negative regulation of cell differentiation (GO:0045596)	2/151	0.378916	0.540744	-0.901158	0.874521	CTR9;EGFR
kidney development (GO:0001822)	1/64	0.428861	0.571219	-1.03284	0.874423	GREB1L
negative regulation of viral life cycle (GO:1903901)	1/62	0.41876	0.568021	-1.00178	0.872005	EIF2AK2
triglyceride metabolic process (GO:0006641)	1/53	0.371062	0.533507	-0.862018	0.854592	CPS1
regulation of neurogenesis (GO:0050767)	1/58	0.398022	0.553193	-0.925138	0.852281	PER2
regulation of G2/M transition of mitotic cell cycle (GO:0010389)	2/150	0.375814	0.538723	-0.869734	0.851174	CSNK1D;CKAP5
mitotic cytokinesis (GO:0000281)	1/60	0.408481	0.562028	-0.949732	0.850303	CIT
cellular response to organic substance (GO:0071310)	2/134	0.325432	0.506638	-0.749788	0.841713	TBK1;MAPK14
protein homotetramerization (GO:0051289)	1/58	0.398022	0.553193	-0.909187	0.837586	MAT1A
cellular response to UV (GO:0034644)	1/68	0.448542	0.580502	-1.04451	0.837437	XPA
activation of protein kinase activity (GO:0032147)	3/234	0.333094	0.512361	-0.759675	0.835134	TAOK3;EIF2AK2;MAPK14
positive regulation of protein binding (GO:0032092)	1/61	0.413643	0.566691	-0.945747	0.83486	AKTIP
phospholipid transport (GO:0015914)	1/59	0.403275	0.557263	-0.917681	0.83338	ATP9B
monocarboxylic acid biosynthetic process (GO:0072330)	1/69	0.453356	0.58202	-1.04674	0.828055	PER2
stress-activated MAPK cascade (GO:0051403)	1/63	0.423833	0.570864	-0.96408	0.827582	MAPK14
membrane lipid biosynthetic process (GO:0046467)	1/61	0.413643	0.566691	-0.936227	0.826456	ST3GAL4
tRNA processing (GO:0008033)	1/63	0.423833	0.570864	-0.962671	0.826373	POP5
regulation of primary metabolic process (GO:0080090)	2/140	0.344476	0.517794	-0.766462	0.816842	TIAM2;FHL2
cell-cell adhesion via plasma-membrane adhesion molecules (GO:0098742)	2/143	0.353935	0.523555	-0.781078	0.811261	TRO;ADGRL1
negative regulation of supramolecular fiber organization (GO:1902904)	1/55	0.381987	0.541102	-0.842633	0.810923	HSPA8
fat cell differentiation (GO:0045444)	1/56	0.387379	0.547123	-0.849634	0.805752	PER2
cellular response to light stimulus (GO:0071482)	1/67	0.443686	0.579694	-0.983808	0.79948	OPN3
glycosaminoglycan metabolic process (GO:0030203)	1/62	0.41876	0.568021	-0.916311	0.797609	IDUA
positive regulation of cell adhesion (GO:0045785)	1/65	0.433846	0.574666	-0.948261	0.791861	RSU1
response to reactive oxygen species (GO:0000302)	1/61	0.413643	0.566691	-0.891457	0.786935	EGFR
vesicle coating (GO:0006901)	1/64	0.428861	0.571219	-0.923989	0.78227	CSNK1D
nuclear-transcribed mRNA catabolic process, deadenylation-dependent decay (GO:0000288)	1/64	0.428861	0.571219	-0.9181	0.777284	CNOT8
renal system development (GO:0072001)	1/60	0.408481	0.562028	-0.867033	0.776262	GREB1L
purine ribonucleotide metabolic process (GO:0009150)	1/67	0.443686	0.579694	-0.953351	0.774729	HSPA8
regulation of pathway-restricted SMAD protein phosphorylation (GO:0060393)	1/60	0.408481	0.562028	-0.862316	0.772039	GDF11
vesicle targeting, rough ER to cis-Golgi (GO:0048207)	1/64	0.428861	0.571219	-0.904314	0.765612	CSNK1D
negative regulation of epithelial cell proliferation (GO:0050680)	1/67	0.443686	0.579694	-0.928454	0.754497	NR2F2
DNA damage response, signal transduction by p53 class mediator resulting in cell cycle arrest (GO:0006977)	1/63	0.423833	0.570864	-0.874545	0.750724	CNOT8
negative regulation of cell proliferation (GO:0008285)	4/364	0.390565	0.549813	-0.796945	0.749257	PER2;TES;EIF2AK2;CNOT8
regulation of protein localization to plasma membrane (GO:1903076)	1/68	0.448542	0.580502	-0.933045	0.74807	EGFR
positive regulation of protein modification by small protein conjugation or removal (GO:1903322)	1/66	0.438788	0.576435	-0.906253	0.746517	FANCI
stress-activated protein kinase signaling cascade (GO:0031098)	1/71	0.46286	0.586558	-0.952683	0.733882	TAOK3
regulation of cellular component organization (GO:0051128)	2/141	0.347634	0.520777	-0.69407	0.733358	HSPA8;FMNL2
negative regulation of cellular catabolic process (GO:0031330)	1/57	0.392724	0.549813	-0.782541	0.731401	TIMP3
negative regulation of MAP kinase activity (GO:0043407)	1/62	0.41876	0.568021	-0.835618	0.72737	AIDA
positive regulation of endothelial cell migration (GO:0010595)	1/71	0.46286	0.586558	-0.943535	0.726835	AKT3
fatty acid catabolic process (GO:0009062)	1/66	0.438788	0.576435	-0.878419	0.723589	ECHDC1
homophilic cell adhesion via plasma membrane adhesion molecules (GO:0007156)	1/65	0.433846	0.574666	-0.864921	0.722266	TRO
COPII vesicle coating (GO:0048208)	1/64	0.428861	0.571219	-0.852398	0.72166	CSNK1D
regulation of cyclin-dependent protein serine/threonine kinase activity (GO:0000079)	1/68	0.448542	0.580502	-0.896026	0.718391	NR2F2
striated muscle contraction (GO:0006941)	1/62	0.41876	0.568021	-0.824381	0.717589	CCDC78
cellular response to reactive oxygen species (GO:0034614)	1/66	0.438788	0.576435	-0.868567	0.715474	EGFR
positive regulation of plasma membrane bounded cell projection assembly (GO:0120034)	1/70	0.458129	0.586558	-0.90599	0.70722	ARHGAP35
transcription-coupled nucleotide-excision repair (GO:0006283)	1/74	0.476807	0.593842	-0.952471	0.705441	XPA
positive regulation of endothelial cell proliferation (GO:0001938)	1/68	0.448542	0.580502	-0.873775	0.700551	AKT3
regulation of actin filament-based process (GO:0032970)	1/63	0.423833	0.570864	-0.815774	0.700274	ARHGAP35
regulation of neuron death (GO:1901214)	1/73	0.472198	0.59272	-0.932169	0.699459	TBK1
positive regulation of cell projection organization (GO:0031346)	1/64	0.428861	0.571219	-0.824492	0.698033	ARHGAP35
regulation of epithelial cell proliferation (GO:0050678)	1/73	0.472198	0.59272	-0.929694	0.697602	EGFR
nervous system development (GO:0007399)	5/456	0.364623	0.529908	-0.688082	0.6942	GDF11;TAOK3;WWP1;ARHGAP26;APBA2
regulation of myeloid cell differentiation (GO:0045637)	1/66	0.438788	0.576435	-0.83829	0.690533	CTR9
O-glycan processing (GO:0016266)	1/66	0.438788	0.576435	-0.836492	0.689052	ST3GAL4
positive regulation of growth (GO:0045927)	1/72	0.467549	0.589973	-0.904092	0.687336	EGFR
negative regulation of protein serine/threonine kinase activity (GO:0071901)	1/68	0.448542	0.580502	-0.854285	0.684925	NR2F2
vascular endothelial growth factor receptor signaling pathway (GO:0048010)	1/71	0.46286	0.586558	-0.883607	0.68067	MAPK14
regulation of peptide hormone secretion (GO:0090276)	1/74	0.476807	0.593842	-0.915307	0.677916	PER2
nucleic acid phosphodiester bond hydrolysis (GO:0090305)	1/74	0.476807	0.593842	-0.913854	0.67684	XPA
B cell activation (GO:0042113)	1/74	0.476807	0.593842	-0.901533	0.667715	CR2
regulation of actin filament polymerization (GO:0030833)	1/69	0.453356	0.58202	-0.837553	0.662568	FCHSD2
spindle assembly (GO:0051225)	1/81	0.507967	0.616633	-0.976526	0.66144	CSNK1D
regulation of hematopoietic progenitor cell differentiation (GO:1901532)	1/78	0.494845	0.607627	-0.933213	0.656525	EIF2AK2
COPII-coated vesicle budding (GO:0090114)	1/69	0.453356	0.58202	-0.824926	0.65258	CSNK1D
regulation of programmed cell death (GO:0043067)	3/269	0.415604	0.568021	-0.74014	0.64986	GDF11;TAOK3;ACTN3
regulation of peptidyl-tyrosine phosphorylation (GO:0050730)	1/86	0.529087	0.628742	-1.01764	0.647831	EGFR
regulation of Notch signaling pathway (GO:0008593)	1/71	0.46286	0.586558	-0.834883	0.643137	EGFR
gland development (GO:0048732)	1/76	0.485905	0.601268	-0.888711	0.641421	ARHGAP35
positive regulation of DNA metabolic process (GO:0051054)	1/83	0.516526	0.61996	-0.969166	0.640261	EGFR
post-translational protein modification (GO:0043687)	4/358	0.378746	0.540744	-0.659399	0.640205	ESCO1;SERPINC1;FN1;AFP
negative regulation of phosphatase activity (GO:0010923)	1/69	0.453356	0.58202	-0.808963	0.639952	MASTL
peptidyl-threonine phosphorylation (GO:0018107)	1/69	0.453356	0.58202	-0.808075	0.639249	TBK1
regulation of actin cytoskeleton organization (GO:0032956)	1/76	0.485905	0.601268	-0.872078	0.629415	ARHGAP35
glucose metabolic process (GO:0006006)	1/65	0.433846	0.574666	-0.747211	0.62397	PER2
intracellular steroid hormone receptor signaling pathway (GO:0030518)	1/67	0.443686	0.579694	-0.765504	0.622077	FHL2
regulation of cytokinesis (GO:0032465)	1/78	0.494845	0.607627	-0.883523	0.621568	CIT
lysosomal transport (GO:0007041)	1/73	0.472198	0.59272	-0.8145	0.611165	AKTIP
positive regulation of hydrolase activity (GO:0051345)	2/173	0.445341	0.580275	-0.754719	0.610503	USP6NL;RSU1
signal transduction involved in mitotic G1 DNA damage checkpoint (GO:0072431)	1/64	0.428861	0.571219	-0.713439	0.604013	CNOT8
RNA transport (GO:0050658)	1/81	0.507967	0.616633	-0.89024	0.602995	CKAP5
ERBB signaling pathway (GO:0038127)	1/81	0.507967	0.616633	-0.882907	0.598027	EGFR
regulation of mitotic cell cycle (GO:0007346)	2/166	0.42461	0.57111	-0.697764	0.597693	BORA;TAOK3
positive regulation of protein kinase activity (GO:0045860)	2/173	0.445341	0.580275	-0.737947	0.596936	TAOK3;XRCC5
negative regulation of phosphorylation (GO:0042326)	1/76	0.485905	0.601268	-0.825933	0.596111	ACTN3
regulation of mitotic cell cycle phase transition (GO:1901990)	2/185	0.479892	0.596909	-0.811064	0.595478	CSNK1D;CKAP5
regulation of ERK1 and ERK2 cascade (GO:0070372)	3/248	0.366329	0.529908	-0.586184	0.58866	FN1;TIMP3;EGFR
regulation of endothelial cell migration (GO:0010594)	1/70	0.458129	0.586558	-0.75401	0.588584	NR2F2
protein catabolic process (GO:0030163)	1/82	0.512265	0.619498	-0.870765	0.582466	HSPA8
positive regulation of JNK cascade (GO:0046330)	1/77	0.490394	0.605262	-0.8162	0.581579	TAOK3
purine ribonucleotide biosynthetic process (GO:0009152)	1/76	0.485905	0.601268	-0.803237	0.57973	ADCY10
positive regulation of binding (GO:0051099)	1/82	0.512265	0.619498	-0.860917	0.575879	AKTIP
regulation of apoptotic process (GO:0042981)	8/816	0.416391	0.568021	-0.656768	0.575414	TIAM2;GDF11;RNF144B;TAOK3;ACTN3;FHL2;FGD1;EGFR
activation of GTPase activity (GO:0090630)	1/85	0.524936	0.624583	-0.892155	0.574974	USP6NL
cytoskeleton-dependent cytokinesis (GO:0061640)	1/71	0.46286	0.586558	-0.739249	0.569467	CIT
regulation of cellular response to heat (GO:1900034)	1/79	0.499257	0.610699	-0.811483	0.563683	HSPA8
DNA repair (GO:0006281)	3/289	0.461369	0.586558	-0.72849	0.563528	FANCI;XRCC5;XPA
protein-DNA complex assembly (GO:0065004)	1/92	0.553245	0.647817	-0.950199	0.562475	XPA
cellular response to oxygen-containing compound (GO:1901701)	3/275	0.429476	0.571244	-0.66435	0.561502	CTR9;MAPK14;EGFR
negative regulation of cell cycle (GO:0045786)	1/73	0.472198	0.59272	-0.747694	0.561037	NR2F2
extracellular matrix disassembly (GO:0022617)	1/79	0.499257	0.610699	-0.806723	0.560377	FN1
positive regulation of cytokine secretion (GO:0050715)	1/74	0.476807	0.593842	-0.753159	0.557822	MAPK14
negative regulation of transcription from RNA polymerase II promoter (GO:0000122)	6/566	0.370455	0.533507	-0.558197	0.554303	PER2;UBE2I;CTR9;FHL2;NR2F2;ARHGAP35
positive regulation of protein complex assembly (GO:0031334)	1/89	0.541324	0.639322	-0.902177	0.553699	XPA
cellular response to cytokine stimulus (GO:0071345)	5/457	0.36635	0.529908	-0.548982	0.55127	HSPA8;TBK1;FN1;IL16;IL1RAP
regulation of hematopoietic stem cell differentiation (GO:1902036)	1/77	0.490394	0.605262	-0.767523	0.546895	EIF2AK2
negative regulation of cell communication (GO:0010648)	1/79	0.499257	0.610699	-0.784893	0.545213	EGFR
positive regulation of protein catabolic process (GO:0045732)	1/82	0.512265	0.619498	-0.813571	0.544209	WWP1
regulation of stem cell differentiation (GO:2000736)	1/89	0.541324	0.639322	-0.885391	0.543397	EIF2AK2
protein localization to nucleus (GO:0034504)	1/97	0.572432	0.664603	-0.972091	0.542292	XPA
positive regulation of protein secretion (GO:0050714)	1/83	0.516526	0.61996	-0.813501	0.537423	BLK
positive regulation of homeostatic process (GO:0032846)	1/84	0.520749	0.621916	-0.821016	0.535702	MAPK14
negative regulation of MAPK cascade (GO:0043409)	1/81	0.507967	0.616633	-0.783069	0.530403	TIMP3
regulation of phosphatidylinositol 3-kinase signaling (GO:0014066)	1/81	0.507967	0.616633	-0.780697	0.528797	EGFR
positive regulation of protein ubiquitination (GO:0031398)	1/84	0.520749	0.621916	-0.81012	0.528592	FANCI
regulation of anatomical structure morphogenesis (GO:0022603)	1/83	0.516526	0.61996	-0.787051	0.51995	FMNL2
regulation of MAP kinase activity (GO:0043405)	1/88	0.537281	0.6369	-0.833645	0.517889	EGFR
response to ionizing radiation (GO:0010212)	1/78	0.494845	0.607627	-0.735477	0.517416	MAPK14
MAPK cascade (GO:0000165)	3/279	0.43866	0.576435	-0.625696	0.515593	TAOK3;WDR83;EGFR
organic substance transport (GO:0071702)	1/88	0.537281	0.6369	-0.825227	0.51266	SLC18A2
protein modification process (GO:0036211)	1/85	0.524936	0.624583	-0.795126	0.512441	UBE2I
regulation of cell cycle process (GO:0010564)	1/91	0.549306	0.643991	-0.854519	0.511942	BORA
establishment of protein localization to membrane (GO:0090150)	1/84	0.520749	0.621916	-0.776877	0.506902	EGFR
positive regulation of cell cycle arrest (GO:0071158)	1/83	0.516526	0.61996	-0.762175	0.503516	CNOT8
DNA damage response, signal transduction by p53 class mediator (GO:0030330)	1/83	0.516526	0.61996	-0.759187	0.501542	CNOT8
regulation of mitotic nuclear division (GO:0007088)	1/85	0.524936	0.624583	-0.776694	0.500562	BORA
cilium assembly (GO:0060271)	3/289	0.461369	0.586558	-0.643152	0.497515	WDR19;CSNK1D;CKAP5
regulation of cell death (GO:0010941)	1/97	0.572432	0.664603	-0.878139	0.48988	TBK1
chemical synaptic transmission (GO:0007268)	3/290	0.463619	0.586558	-0.633645	0.487078	FCHSD2;APBA2;SLC18A2
cell-matrix adhesion (GO:0007160)	1/91	0.549306	0.643991	-0.812463	0.486746	ACTN3
negative regulation of signaling (GO:0023057)	1/84	0.520749	0.621916	-0.742923	0.484747	EGFR
protein tetramerization (GO:0051262)	1/91	0.549306	0.643991	-0.808228	0.484209	MAT1A
positive regulation of cellular metabolic process (GO:0031325)	1/93	0.55715	0.651593	-0.826565	0.483475	MAPK14
cytokine-mediated signaling pathway (GO:0019221)	6/634	0.475575	0.593842	-0.643327	0.478141	HSPA8;CTR9;TCP1;FN1;IL16;IL1RAP
positive regulation of transmembrane receptor protein serine/threonine kinase signaling pathway (GO:0090100)	1/83	0.516526	0.61996	-0.723372	0.477882	GDF11
regulation of cytokine-mediated signaling pathway (GO:0001959)	1/91	0.549306	0.643991	-0.793984	0.475676	ELF1
positive regulation of GTPase activity (GO:0043547)	2/193	0.502188	0.613501	-0.666618	0.459153	USP6NL;RSU1
steroid metabolic process (GO:0008202)	1/100	0.583549	0.667012	-0.84344	0.4543	UBE2I
positive regulation of cell growth (GO:0030307)	1/99	0.579876	0.665192	-0.815754	0.444538	EGFR
B cell receptor signaling pathway (GO:0050853)	1/105	0.601442	0.680168	-0.859052	0.436764	BLK
axon development (GO:0061564)	1/95	0.564858	0.659803	-0.760726	0.434513	ARHGAP35
protein ubiquitination (GO:0016567)	5/507	0.452239	0.58202	-0.534509	0.424157	KLHL29;RNF144B;CTR9;WAC;WWP1
positive regulation of MAPK cascade (GO:0043410)	3/290	0.463619	0.586558	-0.542124	0.416727	TAOK3;EIF2AK2;EGFR
regulation of kinase activity (GO:0043549)	1/102	0.5908	0.672096	-0.786579	0.413959	EGFR
interleukin-1-mediated signaling pathway (GO:0070498)	1/96	0.568661	0.662632	-0.731222	0.412753	IL1RAP
protein processing (GO:0016485)	1/102	0.5908	0.672096	-0.781709	0.411396	PCSK4
protein complex assembly (GO:0006461)	2/190	0.493899	0.607627	-0.579984	0.409135	FN1;CSNK1D
cellular response to organonitrogen compound (GO:0071417)	1/98	0.57617	0.664918	-0.740788	0.408435	LARP1
fatty acid metabolic process (GO:0006631)	1/107	0.608383	0.683985	-0.820888	0.407941	PER2
T cell activation (GO:0042110)	1/89	0.541324	0.639322	-0.661535	0.406009	BLK
phosphatidylinositol biosynthetic process (GO:0006661)	1/99	0.579876	0.665192	-0.741667	0.404165	MTMR7
mitochondrial respiratory chain complex assembly (GO:0033108)	1/98	0.57617	0.664918	-0.728732	0.401788	TTC19
positive regulation of protein metabolic process (GO:0051247)	1/97	0.572432	0.664603	-0.717471	0.400249	WWP1
positive regulation of establishment of protein localization to mitochondrion (GO:1903749)	1/111	0.621907	0.69172	-0.831361	0.394867	PPP3CC
regulation of cell proliferation (GO:0042127)	7/741	0.466682	0.589655	-0.517473	0.39437	BLK;TES;XRCC5;FN1;EIF2AK2;CNOT8;EGFR
viral process (GO:0016032)	2/221	0.575235	0.664918	-0.703958	0.389273	USP6NL;UBP1
peptidyl-threonine modification (GO:0018210)	1/90	0.545332	0.642963	-0.640944	0.388642	TBK1
small GTPase mediated signal transduction (GO:0007264)	1/100	0.583549	0.667012	-0.704861	0.379657	MAPK14
cellular response to metal ion (GO:0071248)	1/101	0.58719	0.670375	-0.710484	0.378266	EGFR
intrinsic apoptotic signaling pathway (GO:0097193)	1/102	0.5908	0.672096	-0.718175	0.37796	ZMAT1
cellular response to oxidative stress (GO:0034599)	1/116	0.63816	0.704253	-0.831892	0.373657	EGFR
peptide metabolic process (GO:0006518)	1/105	0.601442	0.680168	-0.720923	0.366536	HSPA8
positive regulation of cell migration (GO:0030335)	2/222	0.577695	0.665192	-0.665282	0.365046	FN1;EGFR
phosphatidylinositol metabolic process (GO:0046488)	1/113	0.628493	0.695988	-0.779068	0.361822	MTMR7
positive regulation of cell cycle process (GO:0090068)	1/108	0.611808	0.684761	-0.724318	0.355884	CIT
positive regulation of neuron differentiation (GO:0045666)	1/99	0.579876	0.665192	-0.64623	0.352158	ARHGAP35
regulation of cytoskeleton organization (GO:0051493)	1/96	0.568661	0.662632	-0.62166	0.350908	ARHGAP35
Ras protein signal transduction (GO:0007265)	2/224	0.582586	0.667012	-0.645241	0.34861	ABI2;MAPK14
cellular protein localization (GO:0034613)	3/328	0.545747	0.642963	-0.571487	0.346092	CEP68;USP6NL;EGFR
regulation of cellular response to stress (GO:0080135)	1/105	0.601442	0.680168	-0.679409	0.345429	HSPA8
negative regulation of cytokine production (GO:0001818)	1/111	0.621907	0.69172	-0.724561	0.344141	TBK1
regulation of organelle organization (GO:0033043)	1/114	0.631744	0.697975	-0.731724	0.33606	USP6NL
regulation of cell motility (GO:2000145)	1/110	0.61857	0.689777	-0.698117	0.335337	EGFR
response to molecule of bacterial origin (GO:0002237)	1/99	0.579876	0.665192	-0.613137	0.334124	CPS1
plasma membrane bounded cell projection assembly (GO:0120031)	2/242	0.624729	0.692618	-0.705771	0.332021	WDR19;FGD1
positive regulation of cellular catabolic process (GO:0031331)	1/107	0.608383	0.683985	-0.665423	0.330683	CNOT8
macromolecular complex assembly (GO:0065003)	1/121	0.653719	0.714842	-0.749125	0.318436	IL1RAP
endosomal transport (GO:0016197)	2/230	0.597007	0.67755	-0.612932	0.316166	DOPEY1;AKTIP
enzyme linked receptor protein signaling pathway (GO:0007167)	1/121	0.653719	0.714842	-0.725161	0.30825	BLK
neutrophil degranulation (GO:0043312)	4/480	0.603753	0.681175	-0.60754	0.306559	HSPA8;XRCC5;HEXB;MAPK14
positive regulation of neuron projection development (GO:0010976)	1/98	0.57617	0.664918	-0.555248	0.306137	ARHGAP35
ubiquitin-dependent protein catabolic process (GO:0006511)	3/342	0.574131	0.664918	-0.52438	0.290977	RNF144B;UBE2I;WWP1
positive regulation of canonical Wnt signaling pathway (GO:0090263)	1/114	0.631744	0.697975	-0.632899	0.290672	CSNK1D
neutrophil mediated immunity (GO:0002446)	4/488	0.616786	0.688588	-0.598549	0.289239	HSPA8;XRCC5;HEXB;MAPK14
actin filament organization (GO:0007015)	1/121	0.653719	0.714842	-0.667647	0.283802	ABI2
regulation of signal transduction (GO:0009966)	2/234	0.606414	0.683374	-0.56514	0.282679	ELF1;EGFR
positive regulation of NF-kappaB transcription factor activity (GO:0051092)	1/129	0.677241	0.733041	-0.721051	0.281014	EIF2AK2
regulation of macromolecule metabolic process (GO:0060255)	1/130	0.680067	0.73527	-0.725595	0.279763	MAPK14
vesicle organization (GO:0016050)	1/128	0.67439	0.73078	-0.700299	0.275881	AKTIP
cellular macromolecule biosynthetic process (GO:0034645)	3/368	0.623846	0.69244	-0.581548	0.274404	ORC4;ORC3;ST3GAL4
RNA splicing, via transesterification reactions with bulged adenosine as nucleophile (GO:0000377)	2/237	0.61336	0.685562	-0.556471	0.272005	HSPA8;WDR83
double-strand break repair (GO:0006302)	1/142	0.712122	0.758806	-0.795674	0.270136	XRCC5
regulation of protein secretion (GO:0050708)	1/108	0.611808	0.684761	-0.549528	0.270003	PER2
anterograde trans-synaptic signaling (GO:0098916)	2/241	0.622476	0.69172	-0.560283	0.265602	APBA2;SLC18A2
regulation of cell differentiation (GO:0045595)	1/122	0.65675	0.717339	-0.623333	0.262082	EIF2AK2
extracellular matrix organization (GO:0030198)	2/230	0.597007	0.67755	-0.507799	0.261936	FN1;HAS3
neutrophil activation involved in immune response (GO:0002283)	4/484	0.610302	0.684761	-0.53039	0.261907	HSPA8;XRCC5;HEXB;MAPK14
endocytosis (GO:0006897)	2/264	0.671699	0.729512	-0.643589	0.256113	CSNK1D;ATP9B
regulation of neuron projection development (GO:0010975)	1/120	0.650661	0.713941	-0.595054	0.255734	ARHGAP35
transcription, DNA-templated (GO:0006351)	3/357	0.603301	0.681175	-0.502922	0.254146	IVNS1ABP;CTR9;NELFE
activation of MAPK activity (GO:0000187)	1/118	0.644465	0.709578	-0.573913	0.252139	MAPK14
organic anion transport (GO:0015711)	1/125	0.665686	0.725446	-0.618479	0.251683	SLC17A1
regulation of signal transduction by p53 class mediator (GO:1901796)	1/139	0.704421	0.755637	-0.715165	0.250579	MAPK14
positive regulation of protein serine/threonine kinase activity (GO:0071902)	1/119	0.647577	0.71137	-0.571266	0.248225	EGFR
mRNA splicing, via spliceosome (GO:0000398)	2/262	0.667632	0.726742	-0.611985	0.247253	HSPA8;WDR83
negative regulation of multicellular organismal process (GO:0051241)	1/126	0.668612	0.726983	-0.605607	0.243788	EGFR
cellular protein metabolic process (GO:0044267)	4/485	0.611929	0.684761	-0.467326	0.229522	UBE2I;SERPINC1;FN1;AFP
positive regulation of programmed cell death (GO:0043068)	2/258	0.659378	0.71939	-0.545679	0.227253	TIAM2;FGD1
positive regulation of macromolecule biosynthetic process (GO:0010557)	1/143	0.714645	0.760648	-0.65452	0.219899	EGFR
regulation of vesicle-mediated transport (GO:0060627)	1/139	0.704421	0.755637	-0.623477	0.218453	USP6NL
positive regulation of protein kinase B signaling (GO:0051897)	1/128	0.67439	0.73078	-0.551578	0.217292	EGFR
response to lipid (GO:0033993)	1/141	0.709578	0.757585	-0.618216	0.212101	CPS1
skeletal system development (GO:0001501)	1/147	0.724517	0.767747	-0.656166	0.21145	GDF11
positive regulation of Wnt signaling pathway (GO:0030177)	1/141	0.709578	0.757585	-0.586341	0.201165	CSNK1D
muscle contraction (GO:0006936)	1/138	0.701809	0.754523	-0.561793	0.198928	ACTN3
mitochondrial transport (GO:0006839)	1/136	0.696515	0.750368	-0.541762	0.195937	SLC25A21
regulation of protein kinase activity (GO:0045859)	1/148	0.726931	0.769456	-0.610722	0.194774	XRCC5
mRNA processing (GO:0006397)	2/284	0.710187	0.757585	-0.545974	0.186847	HSPA8;WDR83
cellular protein complex assembly (GO:0043623)	1/145	0.719624	0.764252	-0.567489	0.186719	TCP1
positive regulation of cellular biosynthetic process (GO:0031328)	1/160	0.754314	0.794059	-0.654923	0.184653	EGFR
glycerophospholipid biosynthetic process (GO:0046474)	1/165	0.764902	0.802561	-0.65858	0.176505	MTMR7
ion transport (GO:0006811)	2/290	0.720978	0.764843	-0.528179	0.172792	WWP1;SLC17A1
mitochondrion organization (GO:0007005)	1/168	0.771035	0.80723	-0.660514	0.171748	AKT3
inorganic cation transmembrane transport (GO:0098662)	1/141	0.709578	0.757585	-0.494541	0.16967	SLC17A1
cellular response to interleukin-1 (GO:0071347)	1/151	0.734049	0.776133	-0.54641	0.168939	IL1RAP
negative regulation of programmed cell death (GO:0043069)	3/409	0.693925	0.748564	-0.453795	0.165813	RNF144B;FHL2;EGFR
protein stabilization (GO:0050821)	1/153	0.738691	0.780182	-0.544185	0.16482	TCP1
positive regulation of macromolecule metabolic process (GO:0010604)	2/277	0.697162	0.750368	-0.455603	0.164353	FN1;MAPK14
axon guidance (GO:0007411)	1/159	0.752141	0.792641	-0.555324	0.158174	ARHGAP35
protein polyubiquitination (GO:0000209)	2/284	0.710187	0.757585	-0.450322	0.154112	RNF144B;WWP1
nuclear-transcribed mRNA catabolic process (GO:0000956)	1/175	0.784734	0.820676	-0.628017	0.152238	CNOT8
positive regulation of apoptotic process (GO:0043065)	2/308	0.751347	0.792641	-0.530087	0.151546	TIAM2;FGD1
Golgi vesicle transport (GO:0048193)	2/272	0.687566	0.74254	-0.394441	0.147757	COPG2;ATP9B
regulation of transcription from RNA polymerase II promoter (GO:0006357)	12/1479	0.641551	0.707181	-0.322786	0.143274	PER2;IVNS1ABP;ELF1;TBK1;UBE2I;CTR9;FHL2;UBP1;NR2F2;MAPK14;EGFR;ARHGAP35
positive regulation of cell proliferation (GO:0008284)	3/425	0.718479	0.763882	-0.401993	0.132906	FN1;CNOT8;EGFR
positive regulation of transcription, DNA-templated (GO:0045893)	9/1121	0.645548	0.709955	-0.303076	0.132643	IVNS1ABP;ELF1;TBK1;CTR9;FHL2;HAS3;WAC;NR2F2;EGFR
regulation of protein kinase B signaling (GO:0051896)	1/164	0.762821	0.801255	-0.489707	0.132579	EGFR
protein homooligomerization (GO:0051260)	1/191	0.813063	0.845691	-0.633087	0.131015	MAT1A
positive regulation of I-kappaB kinase/NF-kappaB signaling (GO:0043123)	1/164	0.762821	0.801255	-0.461038	0.124818	TBK1
positive regulation of cell motility (GO:2000147)	1/180	0.794017	0.828578	-0.50958	0.117534	EGFR
positive regulation of cell differentiation (GO:0045597)	1/195	0.819546	0.84967	-0.589786	0.11737	MAPK14
RNA processing (GO:0006396)	1/194	0.817946	0.848929	-0.549583	0.110443	IVNS1ABP
regulation of inflammatory response (GO:0050727)	1/167	0.769008	0.805988	-0.413131	0.10851	MAPK14
central nervous system development (GO:0007417)	1/218	0.85271	0.872731	-0.662763	0.105602	WWP1
cilium organization (GO:0044782)	1/193	0.816333	0.848172	-0.520353	0.105597	WDR19
rRNA processing (GO:0006364)	1/203	0.831848	0.857787	-0.553143	0.101837	CSNK1D
rRNA metabolic process (GO:0016072)	1/201	0.828853	0.857787	-0.517767	0.0971914	CSNK1D
regulation of I-kappaB kinase/NF-kappaB signaling (GO:0043122)	1/205	0.834791	0.858975	-0.525381	0.0948702	TBK1
ER to Golgi vesicle-mediated transport (GO:0006888)	1/181	0.795826	0.829562	-0.414757	0.0947201	COPG2
positive regulation of sequence-specific DNA binding transcription factor activity (GO:0051091)	1/216	0.850085	0.870974	-0.572608	0.0930025	EIF2AK2
regulation of cell growth (GO:0001558)	1/202	0.830357	0.857787	-0.46424	0.0863021	EGFR
ion transmembrane transport (GO:0034220)	1/220	0.85529	0.874438	-0.550718	0.0860852	WWP1
negative regulation of apoptotic process (GO:0043066)	3/486	0.798284	0.831221	-0.378334	0.0852352	RNF144B;FHL2;EGFR
ribosome biogenesis (GO:0042254)	1/227	0.86397	0.880497	-0.582429	0.0851608	CSNK1D
regulation of canonical Wnt signaling pathway (GO:0060828)	1/214	0.847413	0.869706	-0.503472	0.0833585	CSNK1D
organelle assembly (GO:0070925)	2/377	0.842823	0.86631	-0.485703	0.0830546	WDR19;CSNK1D
positive regulation of cellular process (GO:0048522)	3/520	0.833988	0.858975	-0.441328	0.0801172	FN1;CNOT8;EGFR
positive regulation of multicellular organismal process (GO:0051240)	1/203	0.831848	0.857787	-0.409141	0.0753253	EIF2AK2
negative regulation of cellular process (GO:0048523)	3/535	0.847941	0.869706	-0.451019	0.0743929	TES;EIF2AK2;CNOT8
apoptotic process (GO:0006915)	1/232	0.869852	0.884611	-0.490374	0.068374	CIT
ncRNA processing (GO:0034470)	1/228	0.865167	0.880781	-0.465535	0.0674245	CSNK1D
proteasomal protein catabolic process (GO:0010498)	1/238	0.876577	0.890505	-0.486223	0.0640507	WWP1
positive regulation of intracellular signal transduction (GO:1902533)	3/480	0.791362	0.826706	-0.264948	0.061998	TBK1;EIF2AK2;EGFR
protein modification by small protein removal (GO:0070646)	1/262	0.900192	0.911599	-0.528079	0.0555259	SENP5
axonogenesis (GO:0007409)	1/224	0.860316	0.87864	-0.333676	0.0502036	ARHGAP35
transmembrane receptor protein tyrosine kinase signaling pathway (GO:0007169)	2/397	0.862989	0.880433	-0.335794	0.0494802	BLK;MAPK14
antigen receptor-mediated signaling pathway (GO:0050851)	1/258	0.896594	0.908915	-0.443506	0.0484094	BLK
inflammatory response (GO:0006954)	1/253	0.891915	0.905129	-0.422915	0.0483748	TBK1
positive regulation of ERK1 and ERK2 cascade (GO:0070374)	1/202	0.830357	0.857787	-0.239448	0.0445133	EGFR
negative regulation of signal transduction (GO:0009968)	1/284	0.917867	0.927539	-0.450118	0.0385764	EGFR
protein transport (GO:0015031)	1/327	0.943921	0.947875	-0.605262	0.0349313	USP6NL
proteasome-mediated ubiquitin-dependent protein catabolic process (GO:0043161)	1/292	0.923491	0.931259	-0.406223	0.0323332	WWP1
transcription from RNA polymerase II promoter (GO:0006366)	2/486	0.927053	0.93387	-0.41236	0.031234	CTR9;NELFE
proteolysis (GO:0006508)	1/292	0.923491	0.931259	-0.35115	0.0279496	PCSK4
regulation of cell migration (GO:0030334)	1/317	0.938713	0.944623	-0.381395	0.0241217	EGFR
regulation of cellular macromolecule biosynthetic process (GO:2000112)	3/632	0.915883	0.92651	-0.273428	0.0240253	ESCO1;CTR9;CNOT8
intracellular protein transport (GO:0006886)	1/348	0.95347	0.956462	-0.413276	0.0196916	USP6NL
positive regulation of transcription from RNA polymerase II promoter (GO:0045944)	4/849	0.940928	0.945859	-0.320696	0.0195269	ELF1;TBK1;CTR9;EGFR
transmembrane transport (GO:0055085)	1/379	0.964689	0.966705	-0.477824	0.0171775	WWP1
regulation of nucleic acid-templated transcription (GO:1903506)	2/608	0.970486	0.971499	-0.243426	0.00729255	CTR9;CNOT8
regulation of gene expression (GO:0010468)	4/1038	0.981844	0.981844	-0.279844	0.00512752	CTR9;FN1;CNOT8;MAPK14

## Sheet: DEXSeq Cortex (Adar1 KO)
Term	Overlap	P-value	Adjusted P-value	Z-score	Combined Score	Genes
RNA metabolic process (GO:0016070)	65/192	6.36628e-11	9.37116e-08	-2.00331	47.0325	DDX49;FASTKD1;DDX47;CELF2;HNRNPR;CASC3;DDX41;DUSP11;RBM3;PTBP1;ALKBH1;DHX57;DHX15;DHX16;RBM5;DIS3L2;RBM6;DDX17;RBFOX2;LIG1;PARP1;PARP2;PABPC4;DDX55;DDX56;THOC1;DICER1;GTF2F2;SND1;SUPV3L1;DHX40;HNRNPUL1;DDX39B;HNRNPH1;XRN2;DDX5;DDX27;DHX9;DDX25;DDX21;TBRG4;ATXN2;DHX32;RNASEH1;ATXN1;PCBP3;DHX35;POLR2C;PPP1R8;PCBP2;DHX37;POLR2H;RBM39;RNGTT;HELQ;PNPT1;DDX31;LSM1;SETX;HNRNPL;SNRNP40;AGO3;DHX29;HNRNPC;…
mRNA processing (GO:0006397)	89/284	2.86592e-12	6.32796e-09	-1.47723	39.2619	CCNH;AKAP8L;GPATCH1;PPWD1;HNRNPR;CASC3;DDX41;PRPF19;CCAR1;PTBP1;UBL5;SART3;RSRC1;SNRNP70;PCF11;DHX15;DHX16;RBM5;RBM17;AQR;SCAF11;THOC1;PRPF40B;THOC3;PLRG1;THOC5;GTF2F2;WDR33;ERN1;DHX40;GCFC2;PRPF18;HNRNPUL1;DDX39B;SYF2;HNRNPH1;SARNP;CD2BP2;PPIH;NAA38;SNRPA1;SRSF4;DNAJC8;SRSF5;SRSF6;SRSF7;PRMT9;SNRPA;SNRPB;RBM22;DDX5;SF3B2;SF3B3;RBM8A;DHX9;RNMT;SRRT;CSTF2;SRSF1;TBRG4;DHX32;PUF60;U2AF2;DHX35;POLR2C…
mRNA splicing, via spliceosome (GO:0000398)	78/262	9.34103e-10	8.25e-07	-1.74661	36.3145	GPATCH1;PPWD1;HNRNPR;CASC3;DDX41;PRPF19;CCAR1;PTBP1;UBL5;SART3;RSRC1;SNRNP70;PCF11;DHX15;DHX16;RBM5;DDX17;RBM17;AQR;SCAF11;PRPF40B;PLRG1;GTF2F2;WDR33;DHX40;GCFC2;HNRNPUL1;DDX39B;SYF2;HNRNPH1;CLNS1A;CD2BP2;PPIH;NAA38;SNRPA1;SRSF4;DNAJC8;SRSF5;GEMIN8;SRSF6;SRSF7;SNRPA;SNRPB;RBM22;DDX5;SF3B2;SF3B3;RBM8A;DHX9;SRRT;CSTF2;SRSF1;DHX32;PUF60;U2AF2;DHX35;POLR2C;TRA2B;PCBP2;SYMPK;POLR2H;DCPS;SRSF10;SPEN;HS…
gene expression (GO:0010467)	117/412	2.10197e-12	6.32796e-09	-1.25846	33.8376	RPL4;RPL5;NUP107;CASC3;RPL6;DHX57;EPC1;RPS10;RPS13;DDX17;RPL21;RPL22;THOC1;THOC3;THOC5;ILF2;EEF1A1;DHX40;HNRNPUL1;DDX39B;SARNP;XRN2;SRSF4;NUP98;RPL26;SRSF5;SRSF6;SRSF7;POM121;RBM8A;DHX9;TARS;BAZ2B;MRPL13;DHX32;ATXN1;NUP85;DHX35;DHX37;TSPAN5;SYMPK;NUP88;NUP153;MAGOHB;HARS2;SETX;HNRNPL;PPP5C;COPS5;FUBP3;RPL27A;TCF3;DHX29;RPS21;RPS24;FARSB;MRPS17;HBS1L;LDB1;MRPS14;CELF2;ASH2L;MRPL32;DUSP11;RBM3;MRPL…
protein deacetylation (GO:0006476)	17/33	1.06022e-06	0.000468193	-1.99044	27.3826	HDAC4;HDAC5;HDAC2;HDAC3;HDAC10;HDAC1;HDAC11;SIRT5;SIRT1;SIRT2;MORF4L1;BRMS1;SIN3B;SIN3A;MIER2;MIER1;SUDS3
RNA splicing, via transesterification reactions with bulged adenosine as nucleophile (GO:0000377)	73/237	6.06877e-10	6.69992e-07	-1.2661	26.87	GPATCH1;PPWD1;HNRNPR;CASC3;DDX41;PRPF19;CCAR1;PTBP1;UBL5;SART3;RSRC1;SNRNP70;PCF11;DHX15;DHX16;RBM5;RBM17;AQR;PRPF40B;PLRG1;GTF2F2;WDR33;DHX40;GCFC2;HNRNPUL1;DDX39B;SYF2;HNRNPH1;CD2BP2;PPIH;NAA38;SNRPA1;SRSF4;DNAJC8;SRSF5;SRSF6;SRSF7;SNRPA;SNRPB;RBM22;DDX5;SF3B2;SF3B3;RBM8A;DHX9;SRRT;CSTF2;SRSF1;DHX32;PUF60;U2AF2;DHX35;POLR2C;TRA2B;PCBP2;SYMPK;POLR2H;SRSF10;SPEN;HSPA8;PRPF38A;FUS;CWC15;MAGOHB;LSM…
cellular macromolecule biosynthetic process (GO:0034645)	90/368	1.37612e-06	0.000485166	-1.74774	23.5879	MRPS17;RPL4;RPL5;ACHE;HBS1L;LDB1;MRPS14;ASH2L;RPL6;MRPL32;ING4;ING5;MRPL3;MRPL42;EEF2K;EPC1;MRPL9;TOPBP1;RPS10;RPS13;RFC5;NCOA1;TIPIN;WARS;RPL21;MRPS24;NCOA6;PABPC4;RPL22;TOP3A;ARNT;MRPS21;BAZ1B;MRPS7;GTPBP2;ILF2;SIRT1;EEF1A1;EEF1G;MRPS9;DBF4;EEF1D;GRWD1;NUP98;RPL26;GTF3C1;BLM;SMARCD3;RPL10;ATF6B;RPL12;MRPS33;RPL11;TARS;RRBP1;BAZ2B;TYMS;MRPL13;TBRG1;RECQL4;ORC4;RECQL5;ORC6;POLR2C;IGF2BP3;NT5M;POL…
RNA processing (GO:0006396)	60/194	1.68153e-08	1.23761e-05	-1.3148	23.5363	MAPKBP1;DDX47;CELF2;CELF3;AKAP8L;HNRNPR;DUSP11;RBM3;PTBP1;RSRC1;SNRNP70;KHSRP;DHX57;DHX15;DHX16;RBM5;RBM6;DDX17;SCAF11;PABPC4;THOC1;DICER1;DHX40;PRPF18;HNRNPUL1;DDX39B;HNRNPH1;TEP1;XRN2;SNRPA1;RP9;SRSF4;SRSF5;SRSF7;PRMT9;SNRPB;SF3B2;SF3B3;DHX9;DDX25;SRSF1;DHX32;ATXN1;U2AF2;DHX35;DHX37;RBM39;RNGTT;PNPT1;MTERF3;LSM1;USB1;MAGOHB;SETX;SMU1;HNRNPL;SNRNP40;SNRNP48;DHX29;HNRNPC
positive regulation of RNA metabolic process (GO:0051254)	18/36	9.05359e-07	0.000444229	-1.66799	23.21	UTP15;DDX5;MAP2K2;PNPT1;DIMT1;HEATR1;WDR75;PIK3R1;NFKB1;EGFR;SETX;SUPV3L1;ERN1;BMP4;U2AF2;BUD23;HRAS;RBM22
regulation of mRNA splicing, via spliceosome (GO:0048024)	24/61	3.46919e-06	0.000909339	-1.83676	23.0909	DDX17;DDX5;RBM25;RBFOX1;RBFOX2;RBM8A;RBFOX3;SFSWAP;CELF3;SMU1;HNRNPL;PTBP1;SNW1;THRAP3;U2AF2;TRA2B;SRSF4;NUP98;RBM7;SRSF6;RBMX;SRSF7;SRSF10;RBM5
regulation of intracellular signal transduction (GO:1902531)	97/423	1.05287e-05	0.00211339	-1.94183	22.2561	RPL5;TRIO;FAM13B;WWC1;ULK4;EHMT1;ARHGAP39;NOC2L;PREX1;STK11;AKT1;CSNK2A1;WNT5A;OCRL;BCR;DEPDC1B;KAT6A;L3MBTL1;BLM;MEAF6;NOP2;ARHGAP18;PIK3R2;KALRN;RHOBTB1;INPP5B;ARHGAP21;ABR;PIP5K1A;PIP5K1C;SRGAP1;TGFB2;ARHGAP26;BMP7;ARHGAP25;NET1;BMP4;TBCK;BMP3;PEX5L;JMY;PIN1;NF2;ATR;PPP1R13B;PHF20;LRRK2;CHD4;ARHGAP4;ING5;TOPBP1;RFC5;ARHGEF12;TBP;PLEKHG5;ARHGEF17;TOP3A;ARAP3;PPP2R5C;GMIP;VAV1;PJA2;ARHGAP10;ARHG…
protein deubiquitination (GO:0016579)	67/258	3.50063e-06	0.000909339	-1.76974	22.2325	USP35;USP38;KDM1B;TRRAP;ARRB2;MYSM1;ACTB;PSMD8;YY1;PSMD6;NFRKB;USP5;RIPK2;ACTR5;USP3;ACTL6A;RAD23A;JOSD2;AXIN2;ACTR8;UCHL5;DDB2;HCFC1;KAT2B;PSMA3;PSMA1;DMWD;PSME4;STAMBP;STAM2;BIRC2;ENY2;VCP;USP15;USP27X;PSMD11;USP16;PSMD14;MINDY1;PSMD13;USP11;FOXK2;FOXK1;BRCC3;TANK;USP18;USP19;TFPT;ATXN3;PSMB4;PSMB5;STAMBPL1;PSMB3;SUDS3;RCE1;USP25;MBD5;MBD6;TAF10;USP22;ADRM1;USP28;PSMC6;COPS5;PSMC4;TADA3;TAB1
establishment of protein localization to organelle (GO:0072594)	21/63	0.000233542	0.0177814	-2.59617	21.7096	RPAIN;RANBP1;POM121;IPO11;NUP107;RANBP3;RANBP17;NUP153;SCRIB;PTTG1IP;RAB11A;HK1;MCM3AP;IPO9;NUP85;AKT1;HEATR3;NUP88;NUP98;RAE1;TNPO3
plasma membrane bounded cell projection assembly (GO:0120031)	63/242	6.1947e-06	0.00151977	-1.76623	21.1802	TTC26;CYFIP1;NRP1;CEP126;TRAF3IP1;IFT172;FNBP1L;CDC14A;CDC14B;IFT52;DZIP1L;ARFIP2;BBS9;TEKT3;BBS7;SNAP29;BBS4;DYNC2H1;MKKS;RFX3;IFT80;OCRL;ANO6;EMP3;DYNLL1;KIF27;SHTN1;IFT88;SPATA13;CDH13;TNIK;ARHGEF7;IFT46;RAPGEF6;VCL;INTU;ASAP1;FGD1;SLC9A3R1;IFT74;FGD4;FGD5;ABLIM3;STK36;TMEM67;TCTEX1D2;PIP5K1A;NPHP3;FLNA;INPP5K;WHAMM;CFAP20;BBS2;GSN;FOXJ1;FUZ;ICK;AHI1;TMEM237;MKS1;B9D1;FXYD5;CLUAP1
intracellular protein transport (GO:0006886)	85/348	2.82131e-06	0.000830593	-1.63648	20.9114	RAB3B;RPAIN;IPO11;C2CD5;NUP107;ZFYVE9;CLTC;IPO5;HID1;IPO9;XPO4;XPO6;AKT2;LAMP2;TBC1D30;XPO5;AKT1;ARFIP2;EIF2D;TMED7;VPS36;TNPO3;NSF;TMED9;TBC1D8;TBC1D2B;STX1B;TBC1D2;RAB31;CTTN;TBC1D5;RAB34;RAB35;ADPRH;ERP29;TBC1D25;PICK1;KDELR2;PREB;NUP98;ARHGEF2;RBM22;NAPA;COPB2;POM121;TBC1D9B;RAB1B;RPL11;KATNB1;VPS26A;PTTG1IP;TRAK1;GGA2;RAB21;GGA1;DSCR3;GGA3;NUP85;STX6;HEATR3;NUP88;STX3;RAE1;SNX8;AP1M2;SEC31A;…
response to UV-A (GO:0070141)	5/7	0.00124964	0.050814	-2.97921	19.9157	MME;AKT1;PPID;EGFR;CERS1
histone modification (GO:0016570)	36/99	1.47374e-07	9.29721e-05	-1.25827	19.793	HDAC4;HDAC5;ENY2;HDAC2;USP16;HDAC10;HDAC1;TRRAP;HDAC11;EHMT1;SGF29;NSD3;SIN3B;SIN3A;RUVBL2;MIER2;MIER1;SUDS3;PRMT6;KDM4A;CREBBP;PRMT2;EYA3;TAF10;USP3;USP22;BAZ1B;SIRT1;SIRT2;MORF4L1;BRMS1;KAT6B;CARM1;KAT6A;KANSL3;EZH2
ncRNA processing (GO:0034470)	58/228	2.94415e-05	0.00464334	-1.8899	19.7175	RPL4;RPL5;DDX49;DDX47;POP1;WDR3;POP4;INTS10;ADAR;RPL6;FARS2;RPS10;RPS13;DIS3L2;UTP15;RPL21;TEX10;PIH1D1;RPL22;DDX56;WDR75;DICER1;CSNK1E;EBNA1BP2;KARS;XRN2;MRTO4;RPP21;PIH1D2;RPL26;DDX27;RPL10;RPL12;RPL11;SRRT;HEATR1;RPF1;EMG1;EXOSC5;DHX37;RPL19;UTP6;INTS1;UTP4;KRR1;RRP1B;WDR12;TARBP2;BYSL;RCL1;LAS1L;AGO3;RPL27A;INTS6;RPS21;INTS8;RPS24;AARS
regulation of protein complex assembly (GO:0043254)	25/74	4.80696e-05	0.00556733	-1.95409	19.4292	NAPA;VCP;TRAF3IP1;RNF4;SENP6;NCLN;VPS11;TRAPPC12;LCMT1;VPS18;HSPA8;SLF1;GSN;WARS;PIH1D1;DAB2IP;EIF2AK2;HCFC1;STX1B;KIF9;VPS41;ULK1;PREB;ANKRA2;NOP53
cellular response to peptide hormone stimulus (GO:0071375)	34/111	2.49599e-05	0.00423935	-1.82276	19.318	HDAC5;C2CD5;PIK3R2;ADCY2;ADCY1;PIK3R1;ADCY8;ADCY7;CRHR1;ADCY6;ADCY5;GNG2;AKT2;AKT1;INPP5K;PRKACB;XBP1;PARP1;MYO5A;SORBS1;GNG11;NFKB1;RAB10;KAT2B;CPEB1;ADCY9;RAB31;RPS6KB1;PRKAR1B;PRKAR1A;MARS;GNB4;VAMP2;RHOQ
protein localization to membrane (GO:0072657)	48/161	1.42825e-06	0.000485166	-1.40027	18.8463	RAMP2;NLGN2;NRXN1;LIN7B;IKBKB;SLC9A3R1;DPP6;EFR3A;PDZD11;DVL1;MAP7;TSPAN5;PIP5K1A;FLNA;INPP5K;ARL5A;S100A10;CLASP2;BBS2;TMEM150A;SMURF1;MAGI2;RDX;AP3D1;MYO5A;ANK2;BRAF;ATP1B3;SCRIB;ATP1B1;ANK1;RAB11A;RAB10;TSPAN15;CACNB3;DLG1;DLG4;RAB34;SLMAP;PKP2;PICK1;NUP54;TNIK;AGRN;GAS6;FGF13;RAPGEF6;FERMT2
protein localization to nucleus (GO:0034504)	32/97	7.90331e-06	0.0018369	-1.59301	18.7151	RPAIN;POM121;IPO11;NUP107;RPL11;PTTG1IP;TOR1AIP1;TBRG1;IPO9;NUP85;DVL1;LMNA;HEATR3;NUP88;RAE1;TNPO3;BBS4;RANBP1;RANBP3;RANBP17;ABCA7;NUP153;BMP7;SUPT7L;COL1A1;BMP4;MCM3AP;CNEP1R1;PAF1;NUP98;TAF3;NOP53
regulation of transcription from RNA polymerase II promoter (GO:0006357)	288/1479	1.1928e-06	0.000478856	-1.36591	18.6299	ATF1;TCERG1;PID1;HDAC10;MYT1L;CCNH;CCNC;GABPB1;RBPJ;NOC2L;ELK3;DCAF6;TIAL1;TBK1;ZMIZ2;RPS6KA1;SAP130;EPC1;EPC2;TRIM27;CCNL1;ACVR1;DDX17;SMARCC1;SMARCC2;PRKCB;MED8;RFX3;EBF4;RFX1;DICER1;HCFC1;RUNX1;SFRP2;RFX7;PRKAR1A;TBPL1;ANKRA2;SRCAP;DHX9;NEDD4L;PIK3R2;PIK3R1;ZBTB2;HIVEP1;ABCA2;CREBBP;EGR2;XBP1;BCL11A;SS18L1;NR2F1;EAF2;THAP12;PBX2;NR2F2;MED13L;SMARCA4;SETX;MLLT10;TADA2A;SNW1;FUBP3;PAF1;GTF2IRD1;…
response to glucagon (GO:0033762)	14/35	0.000306106	0.0214566	-2.2875	18.5095	ADCY2;ADCY1;ADCY8;ADCY7;GNG11;ADCY6;ADCY5;GNG2;ADCY9;PRKAR1B;PRKAR1A;GNB4;CRY1;PRKACB
protein modification by small protein removal (GO:0070646)	71/262	3.26803e-07	0.000180395	-1.22156	18.2427	USP35;USP38;KDM1B;TRRAP;ARRB2;MYSM1;ACTB;PSMD8;SENP6;YY1;PSMD6;NFRKB;USP5;RIPK2;ACTR5;USP3;ACTL6A;RAD23A;JOSD2;AXIN2;ACTR8;SENP2;UCHL5;DDB2;HCFC1;KAT2B;PSMA3;PSMA1;DMWD;PSME4;STAMBP;STAM2;BIRC2;VCP;USP15;USP27X;PSMD11;USP16;PSMD14;PSMD13;USP11;GPS1;COPS7B;FOXK2;FOXK1;COPS7A;BRCC3;TANK;USP18;USP19;TFPT;ATXN3;PSMB4;PSMB5;STAMBPL1;PSMB3;SUDS3;RCE1;USP25;MBD5;MBD6;TAF10;USP22;ADRM1;USP28;COPS4;PSMC6;…
negative regulation of mRNA splicing, via spliceosome (GO:0048025)	8/14	0.000338206	0.0222913	-2.26837	18.1285	PTBP1;U2AF2;SFSWAP;SRSF4;SRSF6;RBMX;SRSF7;SRSF10
positive regulation of RNA splicing (GO:0033120)	11/23	0.000208559	0.0161579	-2.13744	18.1155	SETX;ERN1;SNW1;THRAP3;U2AF2;TRA2B;CELF3;NUP98;PIK3R1;RBMX;RBM22
tRNA aminoacylation for protein translation (GO:0006418)	18/47	8.61984e-05	0.00865119	-1.91005	17.8758	YARS;LRRC47;WARS;VARS;PARS2;TARS;MRPL39;HARS2;FARS2;WARS2;AIMP1;LARS2;KARS;MARS;TARS2;IARS;FARSB;AARS
histone deacetylation (GO:0016575)	16/37	3.70781e-05	0.00496172	-1.72436	17.5928	HDAC4;HDAC5;HDAC2;HDAC10;HDAC1;HDAC11;SIRT1;SIRT2;MORF4L1;PER1;BRMS1;SIN3B;SIN3A;MIER2;MIER1;SUDS3
negative regulation of RNA splicing (GO:0033119)	10/19	0.000148879	0.0128911	-1.98916	17.5293	PTBP1;U2AF2;SFSWAP;TMBIM6;SRSF4;SRSF6;RBMX;SRSF7;SRSF10;RPS13
RNA transport (GO:0050658)	27/81	3.19666e-05	0.00470548	-1.69301	17.524	POM121;RBM8A;SRSF1;CASC3;NXF1;ATXN2;U2AF2;XPO5;RAE1;RANBP1;RBFOX1;PNPT1;RANBP3;THOC1;NUP153;THOC3;MAGOHB;THOC5;TGFBR2;TST;DDX39B;SARNP;SRSF4;NUP98;SRSF5;SRSF6;SRSF7
histone acetylation (GO:0016573)	26/72	8.85169e-06	0.00186646	-1.50256	17.4822	MEAF6;TRRAP;CHD5;SGF29;JADE2;ING4;ING5;RUVBL2;EP400;EPC1;CREBBP;BRD1;BRPF3;TAF10;ACTL6A;SUPT7L;MORF4L1;PER1;KAT2B;TAF6L;TADA2A;YEATS2;KAT6B;KAT6A;KANSL3;TADA3
UDP-N-acetylglucosamine biosynthetic process (GO:0006048)	7/12	0.000691729	0.0359374	-2.3738	17.2725	NAGK;GNPDA2;GFPT2;AMDHD2;PGM3;GNPNAT1;UAP1
phosphorylation (GO:0016310)	88/387	3.68504e-05	0.00496172	-1.67425	17.0918	PANK2;LRRK2;MAST1;HK1;IKBKB;DSTYK;STK11;TBK1;RPS6KA1;TLK2;AKT1;PRKACB;MAP3K5;JAK1;ACVR1;CDKL2;MAP4K2;EPHA7;CDKL4;CSNK2A1;PRKCB;MINK1;ADAM10;CSNK1E;DGKZ;PHKA2;CDC25B;TGFBR2;BCR;ERN1;ILF3;PRKAR1B;RARA;SIK3;PICK1;ULK1;SGK3;BIRC6;TNIK;SIK2;FAM20A;GAS6;CAMK2B;CAMK2D;BRSK2;PIK3R4;AURKA;MAPK9;TKFC;STK36;MKNK1;PHKG2;STK38;PTK2B;FYN;MARK4;MAP4K3;MAP4K4;TEFM;CDK17;TGFB2;SURF1;GK;CSNK1A1;NEK6;LIMK2;TNK2;EIF…
cellular protein modification process (GO:0006464)	196/1002	4.9168e-05	0.00556733	-1.69281	16.7932	PGAP1;DCAF6;GOLGA2;PSMD8;PSMD6;TBK1;AKT2;RPS6KA1;AKT1;PRKACB;ACVR1;ATG3;CSNK2A1;PRKCB;P3H1;CSNK1E;PHKA2;BCR;PRKAR1B;PSME4;ADPRH;MXRA8;SIK3;SPARCL1;ULK1;SIK2;OBSL1;MTMR2;MTMR3;RPN2;DCUN1D1;PIK3R4;COPS7B;COPS7A;MTMR6;CDK17;B3GALNT1;FN1;EIF2AK3;EIF2AK2;ABCA7;BRAF;EIF2AK4;ICK;PPP5C;WNK2;FBXL3;FBXL5;FBXL4;PTPRT;PTPRS;PTPRK;DDA1;IKBKB;UBL5;DSTYK;ELOC;JAK1;MAP4K2;MINK1;ANO8;SUMF2;DDB2;DUSP7;DDB1;PSMA3;P…
regulation of alternative mRNA splicing, via spliceosome (GO:0000381)	17/40	2.79914e-05	0.00457814	-1.58589	16.6258	DDX17;DDX5;RBM25;RBFOX1;RBFOX2;RBM8A;RBFOX3;CELF3;SMU1;HNRNPL;PTBP1;THRAP3;TRA2B;RBM7;SRSF6;RBMX;RBM5
nuclear envelope disassembly (GO:0051081)	17/47	0.000301876	0.0214566	-2.04066	16.5405	NDC1;POM121;NUP107;PRKCB;DCTN1;NEK6;AKAP8L;NUP153;CCNB2;NUP85;CNEP1R1;LMNA;NUP35;NUP54;NUP88;NUP98;RAE1
translation (GO:0006412)	63/233	1.59581e-06	0.000503364	-1.21809	16.2593	MRPS17;RPL4;RPL5;HBS1L;VARS;MRPS14;GFM2;APEH;RPL6;MRPL32;FARS2;MRPL3;MRPL42;EEF2K;MRPL9;RPS10;RPS13;WARS;RPL21;MRPS24;PABPC4;RPL22;MRPS21;QRSL1;MRPS7;GTPBP2;EEF1A1;EEF1G;LARS2;MRPS9;KARS;EEF1D;MRTO4;TARS2;RPL26;RPL10;RPL12;MRPS33;RPL11;MRPL16;TARS;RRBP1;MRPL13;IGF2BP3;RPL19;YARS;RWDD1;NDUFA7;MTERF3;HARS2;WARS2;AIMP1;RSL1D1;COPS5;RPL27A;MARS;RPS6KB2;RPL22L1;IARS;RPS21;RPS24;FARSB;AARS
activation of protein kinase A activity (GO:0034199)	10/17	4.19185e-05	0.005142	-1.60577	16.1858	ADCY9;PRKAR1B;PRKAR1A;ADCY2;ADCY1;ADCY8;ADCY7;PRKACB;ADCY6;ADCY5
transcription, DNA-templated (GO:0006351)	80/357	0.000135448	0.012246	-1.80609	16.0867	TCERG1;LDB1;CCNH;ASH2L;ARRB2;AFF4;SALL2;EPC1;ELOC;PKNOX1;NFRKB;GABPA;GTF2I;NCOA1;TBP;PARP1;TSC22D1;NCOA6;LMO4;ARNT;TFB2M;ASH1L;POLRMT;BAZ1B;ILF2;GTF2F2;HCFC1;TAF6L;NCOR1;IRF3;NFX1;ELF5;TBPL1;IRF9;GTF3C1;GTF2A2;DDX5;SMARCD3;ATF6B;RNMT;DDX21;BAZ2B;MLLT3;POLR2C;DVL1;HSF1;HIVEP1;POLR2H;TEFM;EGR2;XBP1;RNGTT;MTERF3;POLR3GL;TAF10;SWT1;ECD;EAF2;SSRP1;GTF2H2;MEIS2;NFKB1;GTF2H5;SETX;XAB2;PPP5C;CDK7;COPS5;T…
RNA splicing (GO:0008380)	31/107	0.00017541	0.0140838	-1.81443	15.6919	MAPKBP1;SF3B2;SF3B3;DDX47;DDX25;CELF3;PTBP1;RSRC1;SNRNP70;TRA2B;KHSRP;DHX15;DHX16;SRSF10;MTERF3;SCAF11;LSM1;USB1;MAGOHB;SMU1;SNRNP40;PRPF18;DDX39B;TEP1;SNRPA1;RP9;SNRNP48;SRSF4;HNRNPC;SRSF7;SNRPB
protein complex assembly (GO:0006461)	48/190	0.000163827	0.0135625	-1.79079	15.6098	NAPA;CAMK2D;BLM;COL16A1;HDAC1;TRRAP;TRADD;GOSR2;LRRK2;RAB1B;ASH2L;BCL10;TANK;GOLGA2;PPP6C;WDCP;SNX2;TRIM28;OPA1;RBBP5;PPP6R1;TRA2B;PPP6R3;TRAPPC12;TRAPPC11;HACL1;CAMK2G;SEC31A;NSF;TLE4;CREBBP;SEC24B;CSNK1A1;SEC16A;FN1;ANO6;AXIN2;SMARCA4;PYGO2;BCL9;CXCL12;COL7A1;PREB;TEK;RBMX;CRK;FERMT2;BET1
protein deacylation (GO:0035601)	9/17	0.000305264	0.0214566	-1.91798	15.5248	HDAC4;HDAC5;HDAC3;HDAC10;HDAC1;SIN3A;SIRT5;SIRT1;SIRT2
amino sugar biosynthetic process (GO:0046349)	7/13	0.00130383	0.0509534	-2.31612	15.3847	NAGK;GNPDA2;GFPT2;AMDHD2;PGM3;GNPNAT1;UAP1
UDP-N-acetylglucosamine metabolic process (GO:0006047)	7/13	0.00130383	0.0509534	-2.30899	15.3374	NAGK;GNPDA2;GFPT2;AMDHD2;PGM3;GNPNAT1;UAP1
vesicle-mediated transport (GO:0016192)	91/411	7.77476e-05	0.0079845	-1.60863	15.2209	ZFYVE9;LRRK2;WIPF3;CLTC;FNBP1L;RPH3A;GOLGA4;RINL;TOM1;KIF1B;DENND5A;TRIM27;BVES;SNAP29;SCYL2;GIT1;APPL1;NSF;VPS18;AKTIP;ARAP3;SCRIB;CSNK1E;VRK3;TC2N;ATG14;OTOR;ARFGAP1;BET1L;ARFGAP2;MAPK8IP1;SYTL2;DNM2;STX1B;TBC1D5;RAB35;KXD1;AMPH;VAMP4;SFT2D1;VAMP2;RHOQ;NAPA;TMEM87A;LRP1;DCTN1;GOSR2;TGFBRAP1;GOSR1;PIK3R4;AGAP2;CLEC16A;VPS26A;ASAP1;C2CD4C;AGAP3;TRAK1;KALRN;NCALD;HMGXB4;SNX2;CUX1;VPS52;STX6;VPS11;…
mRNA-containing ribonucleoprotein complex export from nucleus (GO:0071427)	30/101	0.000135882	0.012246	-1.68727	15.023	FYTTD1;POM121;NUP107;RBM8A;DDX25;SRSF1;CASC3;NXF1;U2AF2;NUP85;SYMPK;NUP88;RAE1;SRSF10;NDC1;THOC1;NUP153;THOC3;MAGOHB;THOC5;WDR33;DDX39B;SARNP;NUP35;NUP54;SRSF4;NUP98;SRSF5;SRSF6;SRSF7
viral translation (GO:0019081)	7/14	0.00226946	0.0721003	-2.46747	15.0225	PTBP1;EIF3L;PCBP2;EIF2D;EIF2AK4;EIF3D;EIF3B
focal adhesion assembly (GO:0048041)	9/19	0.000871075	0.0405326	-2.10822	14.8541	CTTN;TRIP6;TAOK2;PIP5K1A;WHAMM;PTPRK;SORBS1;ARHGEF7;FERMT2
histone H3 acetylation (GO:0043966)	18/44	3.05542e-05	0.00465267	-1.42247	14.788	BRD1;MEAF6;LDB1;BRPF3;TAF10;SGF29;JADE2;SUPT7L;ING4;ING5;PER1;KAT2B;TAF6L;TADA2A;YEATS2;KAT6B;KAT6A;TADA3
cell-substrate adherens junction assembly (GO:0007045)	9/19	0.000871075	0.0405326	-2.08987	14.7248	CTTN;TRIP6;TAOK2;PIP5K1A;WHAMM;PTPRK;SORBS1;ARHGEF7;FERMT2
protein localization to cell periphery (GO:1990778)	35/118	4.06254e-05	0.00512577	-1.40469	14.2029	RAMP2;LIN7B;IKBKB;SLC9A3R1;DPP6;EFR3A;PDZD11;MAP7;TSPAN5;PIP5K1A;FLNA;INPP5K;S100A10;CLASP2;BBS2;TMEM150A;SMURF1;RDX;MYO5A;ANK2;ATP1B3;ATP1B1;ANK1;RAB11A;RAB10;TSPAN15;CACNB3;DLG1;RAB34;SLMAP;PKP2;TNIK;GAS6;FGF13;RAPGEF6
nuclear export (GO:0051168)	30/93	2.45105e-05	0.00423935	-1.31941	14.0074	POM121;RBM8A;SRSF1;CASC3;NXF1;ATXN1;XPO4;U2AF2;XPO6;XPO5;NUP88;RAE1;RANBP1;EGR2;RANBP3;SMURF1;RANBP17;THOC1;RITA1;NUP153;THOC3;MAGOHB;THOC5;DDX39B;SARNP;SRSF4;NUP98;SRSF5;SRSF6;SRSF7
renal water homeostasis (GO:0003091)	13/32	0.000418015	0.0263708	-1.79672	13.9784	ADCY2;ADCY1;ADCY8;ADCY7;RAB11A;ADCY6;ADCY5;ADCY9;PRKAR1B;PRKAR1A;MYO5B;RAB11FIP2;PRKACB
regulation of signal transduction by p53 class mediator (GO:1901796)	39/139	6.03936e-05	0.00634996	-1.42624	13.8554	L3MBTL1;RPL5;BLM;HDAC2;PPP1R13B;MEAF6;PHF20;HDAC1;RPL11;NOP2;EHMT1;CHD5;CHD4;NOC2L;AURKA;ING5;STK11;RBBP4;AKT1;TOPBP1;RBBP7;BRD7;RFC5;MBD3;TBP;CSNK2A1;TAF10;TOP3A;SSRP1;ERCC4;RPA3;KAT6A;JMY;PIN1;TAF5;TAF3;NOP53;TAF2;ATR
chromosome organization (GO:0051276)	20/57	0.000148228	0.0128911	-1.56971	13.8398	CENPT;TOP2B;HDAC2;CENPV;PARP1;LDB1;CETN2;GPS1;COPS7B;COPS7A;AXIN2;SIRT1;DDB2;COPS4;CUL4A;DDB1;COPS5;CENPH;MSH2;RAE1
negative regulation of mRNA processing (GO:0050686)	9/16	0.000165846	0.0135625	-1.58984	13.8387	PTBP1;U2AF2;SFSWAP;TMBIM6;SRSF4;SRSF6;RBMX;SRSF7;SRSF10
histone H4-K5 acetylation (GO:0043981)	8/16	0.00109209	0.0468219	-2.0169	13.7546	ING4;MEAF6;KANSL1;PHF20;KANSL2;KANSL3;JADE2;HCFC1
cellular response to UV (GO:0034644)	21/68	0.000744918	0.0382507	-1.9073	13.7368	CREBBP;MME;KDM1A;PARP1;ACTR5;EIF2AK4;PTPRK;USP28;NOC2L;SIRT1;DDB2;YY1;DDB1;STK11;PAPD7;ERCC4;RUVBL2;RPL26;PPID;CERS1;ATR
brain morphogenesis (GO:0048854)	6/12	0.00475643	0.123783	-2.56049	13.6941	BBS2;MKKS;CTNNA2;SHANK2;BBS4;SHANK1
cyclic nucleotide biosynthetic process (GO:0009190)	9/20	0.00137304	0.0527247	-2.07621	13.6837	GUCY1A2;ADCY9;AMPD2;ADCY2;ADCY1;ADCY8;ADCY7;ADCY6;ADCY5
regulation of translation (GO:0006417)	53/214	0.000134081	0.012246	-1.5312	13.6538	CYFIP2;RPL5;CYFIP1;NUP107;RBM3;MTG1;ALKBH1;RPS6KA1;NDC1;NSUN3;CIRBP;ILF3;NUP54;NUP98;RPL26;EIF4E2;POM121;RPL10;DHX9;DDX25;MALSU1;TYMS;GIGYF2;CTIF;ATXN2;LARP1;FXR2;NUP85;POLR2C;IGF2BP3;NUP88;POLR2H;RAE1;EIF2B4;EIF2B2;EIF2AK3;EIF2AK2;NUP153;EIF2AK4;MEX3C;MTOR;PUM3;RPS6KB1;EIF6;CNOT1;CAPRIN1;CNOT2;CNOT3;NUP35;EIF3C;EIF3D;METAP1;EIF3B
protein localization to organelle (GO:0033365)	28/98	0.000453189	0.0274148	-1.76256	13.5703	MTCH2;DHX9;LRRK2;RPL11;TULP3;TOR1AIP1;BICD2;TTC21B;DVL1;LMNA;BBS9;BBS4;CEP68;BBS2;GBF1;ABCA7;ANK2;BMP7;SORL1;RAB11A;DNAJA1;COL1A1;BMP4;CROCC;CNEP1R1;RAB35;PAF1;OBSL1
regulation of ERAD pathway (GO:1904292)	5/9	0.0057512	0.137283	-2.60265	13.4254	BAG6;ATXN3;USP25;BRSK2;USP19
rRNA metabolic process (GO:0016072)	48/201	0.000652555	0.0351425	-1.82229	13.3658	GTF3C1;RPL4;RPL5;DDX27;DDX49;RPL10;DDX47;RPL12;WDR3;POP4;RPL11;HEATR1;RPL6;RPF1;EMG1;EXOSC5;DHX37;RPS10;RPS13;RPL19;DIS3L2;UTP15;UTP6;RPL21;UTP4;KRR1;TEX10;PIH1D1;RPL22;DDX56;WDR75;CSNK1E;RRP1B;WDR12;BYSL;RCL1;EBNA1BP2;XRN1;LAS1L;RPL27A;MARS;XRN2;MRTO4;RPP21;PIH1D2;RPL26;RPS21;RPS24
nucleotide-excision repair (GO:0006289)	32/109	0.000105686	0.0101459	-1.45498	13.3204	CCNH;CETN2;GPS1;COPS7B;COPS7A;PRPF19;ATXN3;POLR2C;SUMO3;SUMO2;POLR2H;RFC5;AQR;SLC30A9;LIG1;PARP1;RAD23A;CHD1L;GTF2H2;SIRT1;GTF2H5;DDB2;COPS4;CUL4A;DDB1;XAB2;CDK7;COPS5;PAPD7;ERCC4;RPA3;TCEA1
positive regulation of protein deubiquitination (GO:1903003)	4/8	0.0217253	0.273617	-3.45585	13.2334	VCP;SART3;TANK;NOP53
tRNA aminoacylation (GO:0043039)	16/41	0.000162935	0.0135625	-1.51048	13.1746	YARS;WARS;VARS;TARS;QRSL1;HARS2;FARS2;WARS2;AIMP1;LARS2;KARS;MARS;TARS2;IARS;FARSB;AARS
nucleotide-sugar biosynthetic process (GO:0009226)	9/20	0.00137304	0.0527247	-1.9802	13.051	NAGK;UGP2;GNPDA2;GFPT2;AMDHD2;MPI;PGM3;GNPNAT1;UAP1
viral process (GO:0016032)	53/221	0.00031671	0.0215168	-1.61863	13.0422	RPL4;RPL5;LRSAM1;NUP107;AP2A2;RPL6;PTBP1;AP1G1;DAG1;EIF2D;RPS10;RPS13;NDC1;PDCD6IP;RPL21;IST1;RPL22;HCFC1;NUP54;NUP98;RPL26;GAS6;PPID;VCP;POM121;TSG101;RPL10;RPL12;RAB1B;RPL11;NEDD4L;NUP85;PCBP2;MVB12B;ATP6V1H;FYN;NUP88;RAE1;AP1M2;RPL19;RANBP1;VTA1;NUP153;EIF2AK4;EIF3L;RPL27A;CHMP2A;NUP35;UBAP1;RPS21;EIF3D;RPS24;EIF3B
regulation of cytoplasmic mRNA processing body assembly (GO:0010603)	5/9	0.0057512	0.137283	-2.52485	13.0241	ATXN2;CNOT6;CNOT6L;CNOT1;CNOT2
proteasome-mediated ubiquitin-dependent protein catabolic process (GO:0043161)	70/292	3.91255e-05	0.00508172	-1.27943	12.9846	UBXN2B;UBXN2A;FAF2;UBE3A;AUP1;ARRB2;PSMD8;PSMD6;MAEA;UBXN4;FBXW5;KCTD2;PPP2R5C;KCTD5;SIRT1;SIRT2;KLHL42;DDB1;PSMA3;PSMA1;HECW2;PSME4;PLAA;ANAPC4;ANAPC1;BIRC2;RNF165;VCP;PSMD11;PSMD14;PSMD13;KLHL15;DERL2;NEDD4L;FBXO45;AGAP3;RNF4;USP19;AURKA;BAG6;ATXN3;PSMB4;PSMB5;SHARPIN;RNF216;PSMB3;BTBD3;TMEM67;PCBP2;SMURF1;CSNK1A1;FBXL19;SGTA;BTBD11;KLHL20;CUL4A;UBE2W;NSFL1C;RNF145;PSMC6;RNF103;NPLOC4;UBE2S;PSM…
positive regulation of mRNA splicing, via spliceosome (GO:0048026)	6/11	0.00272408	0.0835384	-2.1786	12.866	SNW1;THRAP3;TRA2B;CELF3;NUP98;RBMX
activation of MAPKK activity (GO:0000186)	13/34	0.000831819	0.0405326	-1.80378	12.7922	KIDINS220;LRRK2;EIF2AK2;CRKL;BMP4;MAP3K15;RAP1A;TAOK2;TNIK;MAP3K13;CRK;MAP3K4;MAP3K5
lytic vacuole organization (GO:0080171)	12/29	0.000568713	0.0321979	-1.68218	12.5695	VPS18;MBTPS1;AKTIP;GAA;LRRK2;TFEB;HPS4;VPS11;ZKSCAN3;HOOK3;ZKSCAN4;NAGPA
transcription from RNA polymerase II promoter (GO:0006366)	107/486	2.46133e-05	0.00423935	-1.18302	12.5545	TCERG1;CCNH;ICE2;CCNC;RORA;CASC3;RBPJ;NR3C2;TRIM28;SALL2;PKNOX1;NFRKB;GTF2I;LMO4;MED8;THOC1;THOC3;THOC5;GTF2F2;HCFC1;DDX39B;SARNP;TBPL1;PGR;SRSF4;SRSF5;SRSF6;SRSF7;SNRPB;NOTCH3;DDX5;RBM8A;CSTF2;DVL1;HIVEP1;SYMPK;RPRD1A;CREBBP;EGR2;XBP1;POU2F1;INTS1;ECD;NR2F1;EAF2;MAGOHB;ELL2;NFKB1;CDK8;CDK7;COPS5;TADA2A;SNW1;TFCP2;SP1;PAF1;INTS6;INTS8;NFE2L1;NFE2L2;INTS10;ARRB2;AFF4;MED18;PCF11;ELOC;GABPA;TBP;PAR…
protein localization to plasma membrane (GO:0072659)	38/131	3.36516e-05	0.00479373	-1.2149	12.5129	MACF1;RAMP2;IKBKB;SLC9A3R1;DPP6;GOLGA4;EFR3A;MAP7;TSPAN5;PIP5K1A;FLNA;INPP5K;S100A10;CLASP2;BBS2;NSF;TMEM150A;SMURF1;RDX;MYO5A;ANK2;ATP1B3;ATP1B1;ANK1;RAB11A;RAB10;TSPAN15;CACNB3;DLG1;RAB31;RAB34;SLMAP;PKP2;TNIK;GAS6;FGF13;RAPGEF6;VAMP2
mitochondrial RNA metabolic process (GO:0000959)	9/21	0.00208373	0.0686699	-2.02256	12.4865	SUPV3L1;PNPT1;FASTKD1;MTERF3;ELAC2;TFB2M;POLRMT;TBRG4;TEFM
positive regulation of chromatin silencing (GO:0031937)	6/9	0.00065079	0.0351425	-1.6977	12.4566	DNMT1;SETDB1;TRIM28;SIN3A;MIER1;SIRT1
protein targeting to vacuole (GO:0006623)	11/28	0.00160026	0.0567072	-1.92975	12.423	AP3M1;TMEM50A;SMURF1;GOSR2;TMEM50B;VPS41;PIK3R4;AP3D1;VPS13A;NAGPA;SORL1
ubiquitin-dependent protein catabolic process (GO:0006511)	82/342	8.87581e-06	0.00186646	-1.06408	12.3775	UBXN2B;UBXN2A;UBE3A;UBE3B;ARRB2;PSMD8;PSMD6;MAEA;ARIH2;ELOC;FBXO8;RNF43;MYLIP;FBXW5;KCTD2;PPP2R5C;FBXO10;KCTD5;SIRT1;SIRT2;KLHL42;DDB1;PSMA3;WDR81;PSMA1;HECW2;PSME4;PLAA;ANAPC4;ANAPC1;BIRC2;RNF165;VCP;TSG101;PSMD11;PSMD14;PSMD13;KLHL15;UBR4;NEDD4L;FBXO45;AGAP3;RNF4;CBL;BAG6;ATXN3;PSMB4;PSMB5;SHARPIN;RNF213;RNF216;PSMB3;BTBD3;PCBP2;MVB12B;RBBP6;RNF20;RANBP1;XBP1;RANBP3;SMURF1;CSNK1A1;FBXL19;ADRM1;…
phosphatidylinositol dephosphorylation (GO:0046856)	6/12	0.00475643	0.123783	-2.31366	12.3741	INPP5B;MTMR2;MTMR3;INPP5F;INPP5K;MTMR6
mRNA metabolic process (GO:0016071)	28/98	0.000453189	0.0274148	-1.60654	12.3691	DDX5;SF3B2;SF3B3;AKAP8L;SRSF1;HNRNPR;TBRG4;PTBP1;PCBP3;U2AF2;SNRNP70;PCF11;HSF1;PCBP2;DHX15;DIS3L2;PNPT1;SCAF11;WDR33;ERN1;PRPF18;AGO3;SRSF4;DXO;SRSF5;SRSF7;PRMT9;SNRPB
nucleotide-excision repair, DNA damage recognition (GO:0000715)	10/24	0.00153465	0.0567072	-1.88655	12.2238	COPS4;CUL4A;DDB1;COPS5;PARP1;CETN2;GPS1;COPS7B;COPS7A;DDB2
positive regulation of rRNA processing (GO:2000234)	5/10	0.0100834	0.181965	-2.63773	12.1253	UTP15;DIMT1;HEATR1;WDR75;BUD23
ribonucleoprotein complex assembly (GO:0022618)	43/157	4.87964e-05	0.00556733	-1.22001	12.112	RPL5;RPL10;DHX9;CELF2;RPL12;RPL11;NOP2;SRSF1;PRPF19;RPL6;RPF1;ATXN2;SART3;EIF2D;RPS10;SRSF10;RBM5;MTERF3;SCAF11;PTGES3;CIRBP;ERAL1;DICER1;MRPS7;TARBP2;PATL1;SETX;XAB2;GCFC2;PRPF18;SHQ1;SNW1;EIF6;DDX39B;CLNS1A;MRTO4;SRSF5;GEMIN8;SRSF6;LSM14A;NOP53;SNRPB;RBM22
nucleotide biosynthetic process (GO:0009165)	11/27	0.00112324	0.0476943	-1.77818	12.0766	GUCY1A2;PRPS1;ADCY9;MTHFD1;PPAT;ADCY2;ADCY1;ADCY8;ADCY7;ADCY6;ADCY5
cellular response to glucagon stimulus (GO:0071377)	13/33	0.000595226	0.0332724	-1.61965	12.0284	ADCY2;ADCY1;ADCY8;ADCY7;GNG11;ADCY6;ADCY5;GNG2;ADCY9;PRKAR1B;PRKAR1A;GNB4;PRKACB
cAMP biosynthetic process (GO:0006171)	7/15	0.0037049	0.103138	-2.14265	11.9948	ADCY9;ADCY2;ADCY1;ADCY8;ADCY7;ADCY6;ADCY5
proteasomal protein catabolic process (GO:0010498)	56/238	0.000365113	0.0237109	-1.50454	11.9089	UBXN2B;UBXN2A;UBE3A;ARRB2;PRPF19;PSMD8;PSMD6;MAEA;FBXW5;KCTD2;PPP2R5C;KCTD5;SIRT1;SIRT2;KLHL42;DDB1;PSMA3;PSMA1;HECW2;PSME4;PLAA;ANAPC4;ANAPC1;BIRC2;RNF165;VCP;BRSK2;PSMD11;PSMD14;PSMD13;NEDD4L;FBXO45;AGAP3;RNF4;BAG6;ATXN3;PSMB4;PSMB5;SHARPIN;RNF216;PSMB3;BTBD3;PCBP2;SMURF1;CSNK1A1;FBXL19;BTBD11;KLHL20;CUL4A;UBE2W;NSFL1C;RNF145;PSMC6;PSMC4;CDC16;NFE2L2
rRNA processing (GO:0006364)	49/203	0.000445373	0.0274148	-1.54141	11.8945	RPL4;RPL5;DDX49;DDX47;WDR3;POP4;RPL6;RPS10;RPS13;DIS3L2;UTP15;WDR37;RPL21;TEX10;PIH1D1;RPL22;DDX56;WDR75;CSNK1E;EBNA1BP2;XRN2;MRTO4;RPP21;PIH1D2;RPL26;DDX27;RPL10;RPL12;RPL11;NOP2;HEATR1;RPF1;EMG1;EXOSC5;DHX37;RPL19;UTP6;UTP4;KRR1;RRP1B;WDR12;BYSL;RCL1;RSL1D1;EIF6;LAS1L;RPL27A;RPS21;RPS24
protein phosphorylation (GO:0006468)	105/471	1.68681e-05	0.00323868	-1.08162	11.8871	STK11;TBK1;AKT2;RPS6KA1;AKT1;PRKACB;STK32C;MAP3K5;ACVR1;CDKL2;CDKL4;CSNK2A1;PRKCB;ADAM10;CSNK1E;VRK3;PHKA2;CDC25B;BCR;ERN1;ILF3;PRKAR1B;TYRO3;SIK3;ULK1;TNIK;SIK2;BRSK2;PKDCC;PIK3R4;STK36;STK38;MARK4;MAP2K6;CDK17;TGFB2;NEK6;EIF2AK1;EIF2AK3;EIF2AK2;CDC7;BRAF;PHKB;EIF2AK4;CLK3;CLK2;ICK;BMP4;CDK8;CDK7;WNK2;MAP3K10;MAP3K13;FGFR3;FGFR2;ATR;FLT1;MAST3;LRRK2;MAST1;IKBKB;DSTYK;EEF2K;TLK2;JAK1;MAP4K2;MINK1…
histone H4-K8 acetylation (GO:0043982)	8/16	0.00109209	0.0468219	-1.74042	11.8691	ING4;MEAF6;KANSL1;PHF20;KANSL2;KANSL3;JADE2;HCFC1
positive regulation of ribosome biogenesis (GO:0090070)	5/10	0.0100834	0.181965	-2.57883	11.8545	UTP15;DIMT1;HEATR1;WDR75;BUD23
regulation of cilium assembly (GO:1902017)	11/28	0.00160026	0.0567072	-1.82063	11.7205	TCHP;ATG3;IFT88;CROCC;TBC1D30;TCTEX1D2;HTT;FUZ;CEP97;TAPT1;BBS4
regulation of mesenchymal cell proliferation (GO:0010464)	6/13	0.0077158	0.158479	-2.40813	11.7143	WNT5A;CHRD;LRP5;PDGFA;FGFR2;TGFBR2
positive regulation of transcription, DNA-templated (GO:0045893)	208/1121	0.000632536	0.034916	-1.5879	11.6961	ATF1;PID1;CCNH;CCNC;GABPB1;RBPJ;ELK3;DCAF6;TBK1;TRIM28;ZMIZ2;RPS6KA1;ZXDC;AKT1;EPC1;CCNL1;ACVR1;DDX17;SMARCC1;SMARCC2;WDR75;RFX3;EBF4;HCFC1;RUNX1;SFRP2;KARS;DDX39B;TBPL1;DHX9;PIK3R2;BCL10;PIK3R1;NUP85;WBP2NL;INPP5K;CREBBP;EGR2;XBP1;SS18L1;EIF2AK3;EAF2;PBX2;NR2F2;SMARCA4;SETX;COL1A1;MLLT10;SNW1;FUBP3;PAF1;CSRNP2;SETD3;PTPRN;CTCF;LITAF;IKBKB;ING5;EDRF1;HRAS;GABPA;NCOA1;PARP1;PRMT2;NCOA6;RIPK2;TCF12…
astral microtubule organization (GO:0030953)	4/7	0.0123214	0.206104	-2.65876	11.689	DLG1;NUMA1;CLASP1;RAB11A
chromatin remodeling (GO:0006338)	30/117	0.00199005	0.0676003	-1.87395	11.6552	HDAC4;SUV39H2;HDAC5;HDAC2;SMARCD3;HDAC1;KMT2B;CHD4;HMGB1;MYSM1;ACTB;HMGXB4;RBBP4;RUVBL2;MBD3;SMARCC1;DAXX;SMARCC2;PIH1D1;ACTL6A;ATRX;SSRP1;CHD1L;SMARCA4;TOX4;MORF4L1;KAT2B;TAF6L;TADA2A;HNRNPC
positive regulation of dendrite development (GO:1900006)	12/33	0.00216781	0.0709115	-1.89469	11.6221	CUX1;CAPRIN1;SS18L1;DLG5;DAB2IP;VLDLR;CAMK1;PSEN1;OBSL1;BMP7;SHANK2;SHANK1
regulation of phosphorylation (GO:0042325)	35/120	5.96332e-05	0.00634996	-1.19255	11.6003	NRP1;POM121;NUP107;LDB1;PRKRIP1;BCL10;PSEN1;EGFR;IKBKB;NUP85;SESN2;NUP88;RAE1;NDC1;PTGES3;STAT2;ECD;FN1;NUP153;DYNLL1;ATG14;BMP7;BTBD10;SIRT1;SIRT2;BMP4;EIF6;CCDC88C;NDUFS4;NUP35;NUP54;PHIP;NUP98;INHA;NOP53
mRNA export from nucleus (GO:0006406)	32/106	5.84802e-05	0.00634996	-1.19	11.5987	FYTTD1;ENY2;POM121;NUP107;RBM8A;DDX25;ZC3H3;SRSF1;CASC3;NXF1;U2AF2;NUP85;SYMPK;NUP88;RAE1;SRSF10;NDC1;THOC1;NUP153;THOC3;MAGOHB;THOC5;WDR33;DDX39B;SARNP;NUP35;NUP54;SRSF4;NUP98;SRSF5;SRSF6;SRSF7
regulation of cardiac muscle cell action potential (GO:0098901)	10/25	0.00221534	0.0719333	-1.89661	11.5928	DSP;CAMK2D;DLG1;CXADR;SLMAP;PKP2;FLNA;ANK2;CACNA1C;FGF13
response to insulin (GO:0032868)	21/72	0.00167763	0.0587968	-1.80818	11.555	HDAC5;XBP1;C2CD5;PARP1;MYO5A;PIK3R2;PIK3R1;SORBS1;SIRT1;RAB10;KAT2B;CPEB1;RAB31;RPS6KB1;EIF6;AKT2;MARS;AKT1;INPP5K;VAMP2;RHOQ
positive regulation of neuron migration (GO:2001224)	6/13	0.0077158	0.158479	-2.37004	11.529	SHTN1;NIPBL;DAB2IP;PLAA;NSMF;ARHGEF2
establishment of protein localization to vacuole (GO:0072666)	10/22	0.00067503	0.0354873	-1.5671	11.441	CACNG7;CACNG8;TMEM50A;GOSR2;TMEM50B;VPS41;PIK3R4;AP3D1;VPS13A;VPS36
positive regulation of transcription of nuclear large rRNA transcript from RNA polymerase I promoter (GO:1901838)	5/10	0.0100834	0.181965	-2.48873	11.4404	IPPK;PIH1D1;MARS;MTOR;SMARCA4
telomere maintenance via recombination (GO:0000722)	5/11	0.0162162	0.239105	-2.76892	11.4128	SNRNP40;TEP1;ERCC4;XRCC3;SMC6
cilium assembly (GO:0060271)	66/289	0.000286833	0.0212778	-1.3978	11.4013	TTC26;CEP126;C2CD3;TRAF3IP1;IFT172;CETN2;FNBP1L;KIF17;CDC14A;CDC14B;IFT52;CNTRL;DZIP1L;BBS9;TEKT3;BBS7;KIFAP3;CEP97;SNAP29;YWHAG;BBS4;DYNC2H1;CCDC39;MKKS;RFX3;IFT80;OCRL;CSNK1E;DYNLL1;TUBA4A;KIF27;IFT88;CEP63;IFT46;SFI1;SDCCAG8;CCDC40;INTU;DCTN1;ASAP1;IFT74;ABLIM3;STK36;TTC21B;TMEM67;TCTEX1D2;NPHP3;FLNA;MARK4;CEP76;CFAP20;CLASP1;CEP78;BBS2;CFAP74;GSN;ODF2;FOXJ1;FUZ;RAB11A;ICK;AHI1;TMEM237;MKS1;B9…
regulation of phospholipid metabolic process (GO:1903725)	6/11	0.00272408	0.0835384	-1.92973	11.3963	MTMR2;MTMR3;WDR81;MTMR9;PIK3R2;PIK3R1
endosome to lysosome transport (GO:0008333)	16/49	0.00160516	0.0567072	-1.76055	11.3283	VPS18;VCP;AKTIP;TGFBRAP1;AP3D1;CLEC16A;HOOK3;TRAK1;ATG14;CACNG7;CACNG8;HMGXB4;VPS41;VPS11;VIPAS39;SCYL2
negative regulation of gene expression (GO:0010629)	128/619	9.00282e-05	0.00883476	-1.21607	11.3282	KDM1A;HDAC10;EHMT1;RBPJ;ELK3;YY1;TRIM28;EPC1;DIP2A;TRIM27;RPS13;DAXX;NKX6-2;ZGPAT;SMARCC2;MAP2K2;RBFOX2;SFMBT1;WNT5A;RFX3;ERN1;ILF3;SFRP2;SHQ1;BRMS1;KAT6B;KAT6A;ERP29;PGR;DXO;L3MBTL1;DNMT1;GIGYF2;HMBOX1;LARP1;FXR2;ATXN1;DDRGK1;ZKSCAN3;INPP5K;SUDS3;SNX6;HSPA8;TGFB2;POU2F1;PNPT1;MTERF3;PHF12;EIF2AK3;EIF2AK2;NR2F2;BMP7;MEX3C;NFKB1;SMARCA4;BMP4;DAP;SNW1;YEATS2;AGO3;CNOT1;CAPRIN1;CNOT2;CNOT3;MAP3K10;R…
regulation of transcription of nuclear large rRNA transcript from RNA polymerase I promoter (GO:1901836)	6/13	0.0077158	0.158479	-2.32197	11.2952	IPPK;PIH1D1;MARS;NOP53;MTOR;SMARCA4
regulation of mRNA metabolic process (GO:1903311)	7/16	0.00573708	0.137283	-2.18494	11.276	RBM27;RBM26;SLTM;DHX9;SAFB2;SAFB;CDK11B
alternative mRNA splicing, via spliceosome (GO:0000380)	6/13	0.0077158	0.158479	-2.31179	11.2457	DDX17;RBM17;DDX5;DHX9;SRSF1;SRSF6
positive regulation of hydrolase activity (GO:0051345)	42/173	0.000968261	0.0431903	-1.61051	11.177	ITGB1;VCP;MTCL1;MTMR9;RASGRP2;TOR1AIP1;RAP1GAP;DOCK10;DNAJB2;ARHGAP21;ABR;RAP1A;TBC1D30;CCL17;HRAS;S100A10;SEMA4D;ARHGEF37;TPM1;ATP1B3;ATP1B1;RGP1;BCR;NET1;TBC1D2;MSH2;DNAJC10;DNAJB11;RGS10;PIN1;PKP4;PRTN3;SSBP1;GNB5;AGRN;ARHGEF7;CALM1;RAPGEF6;RAB3GAP1;RAPGEF3;EZH2;PICALM
intraciliary transport involved in cilium assembly (GO:0035735)	14/41	0.00191588	0.0655856	-1.77082	11.0811	DYNC2H1;TTC26;TRAF3IP1;IFT172;IFT80;DYNLL1;KIF17;IFT52;IFT74;IFT88;TTC21B;KIFAP3;IFT46;CLUAP1
leptin-mediated signaling pathway (GO:0033210)	4/9	0.0345045	0.32971	-3.2876	11.0682	BBS2;MKKS;SIRT1;BBS4
ATP-dependent chromatin remodeling (GO:0043044)	11/31	0.00408964	0.111481	-2.00728	11.0386	MBD3;SMARCC1;HDAC2;SMARCC2;RBBP4;HDAC1;ACTL6A;CHD4;HNRNPC;ACTB;SMARCA4
nucleotide-excision repair, preincision complex stabilization (GO:0006293)	9/22	0.00305899	0.0882909	-1.90467	11.0274	CUL4A;DDB1;PARP1;ERCC4;RPA3;CHD1L;GTF2H2;GTF2H5;DDB2
protein transport (GO:0015031)	70/327	0.00128752	0.0509534	-1.64809	10.9681	RAB3B;LRSAM1;ZFYVE9;CLTC;VLDLR;TCIRG1;HID1;GOLGA4;LAMP2;TBC1D30;TOM1;ARFIP2;EIF2D;TMED7;ARRDC4;NSF;NDC1;TMED9;PRKCB;TBC1D8;TBC1D2B;DNM2;CLIP3;STX1B;TBC1D2;RAB31;CTTN;TBC1D5;RAB34;RAB35;ADPRH;ERP29;TBC1D25;PICK1;KDELR2;ARHGEF2;VAMP2;NAPA;ATP6V1A;MACF1;COPB2;RAMP2;TBC1D9B;LRP1;RAB1B;VPS26A;GGA2;RAB21;GGA1;DSCR3;RAP1A;GGA3;STX6;ATP6V1H;STX3;SNX8;ATP6V1C1;SEC31A;SNX6;BBS2;GRTP1;SYNRG;AP3D1;MCOLN1;RAB…
positive regulation of transcription from RNA polymerase I promoter (GO:0045943)	9/22	0.00305899	0.0882909	-1.88388	10.907	IPPK;UTP15;PIH1D1;MARS;HEATR1;EIF2AK3;WDR75;MTOR;SMARCA4
negative regulation of small GTPase mediated signal transduction (GO:0051058)	11/28	0.00160026	0.0567072	-1.69232	10.8944	TGFB2;SYNGAP1;RASA3;DAB2IP;SPRY2;MFN2;RASAL1;STAMBP;RASAL3;ARHGAP25;FBP1
neuronal ion channel clustering (GO:0045161)	5/10	0.0100834	0.181965	-2.3258	10.6914	MTCH1;KCNIP2;CNTN2;PICK1;AGRN
histone H3 deacetylation (GO:0070932)	6/13	0.0077158	0.158479	-2.19671	10.6858	HDAC4;PER1;HDAC2;HDAC1;SIRT1;SIRT2
lysosome organization (GO:0007040)	12/32	0.00159596	0.0567072	-1.64253	10.5783	VPS18;MBTPS1;AKTIP;GAA;LRRK2;TFEB;HPS4;VPS11;ZKSCAN3;HOOK3;ZKSCAN4;NAGPA
cellular response to ionizing radiation (GO:0071479)	15/47	0.00285824	0.0847115	-1.7802	10.4276	BLM;KDM1A;TANK;SIRT1;RAD51AP1;NET1;NIPBL;EEF1D;ERCC4;HSF1;TLK2;TMEM109;RPL26;HRAS;ATR
adult heart development (GO:0007512)	5/10	0.0100834	0.181965	-2.26416	10.408	APELA;SCUBE1;MEF2D;MYH6;MYH7
regulation of rRNA processing (GO:2000232)	6/13	0.0077158	0.158479	-2.13906	10.4054	UTP15;SHQ1;DIMT1;HEATR1;WDR75;BUD23
nuclear pore complex assembly (GO:0051292)	5/11	0.0162162	0.239105	-2.52099	10.3909	NDC1;AHCTF1;NUP107;NUP153;NUP98
nucleotide-excision repair, preincision complex assembly (GO:0006294)	11/30	0.00304805	0.0882909	-1.78899	10.3641	CUL4A;DDB1;CDK7;PARP1;CCNH;RPA3;CETN2;CHD1L;GTF2H2;GTF2H5;DDB2
regulation of glucose import in response to insulin stimulus (GO:2001273)	6/14	0.0118005	0.201981	-2.32892	10.3395	OSBPL8;PID1;RARRES2;PIK3R2;PIK3R1;SORBS1
regulation of organelle assembly (GO:1902115)	16/48	0.00125424	0.050814	-1.54663	10.3334	ATG3;GSN;TSG101;PDCD6IP;MTMR3;RAB1B;RDX;RNF4;SENP6;ATXN2;KIF9;IFT88;TCTEX1D2;VPS11;TRAPPC12;CEP76
small RNA loading onto RISC (GO:0070922)	5/10	0.0100834	0.181965	-2.24602	10.3246	AGO3;DHX9;ADAR;DICER1;TARBP2
transcription-coupled nucleotide-excision repair (GO:0006283)	22/74	0.000996982	0.0440267	-1.48554	10.2663	RFC5;AQR;LIG1;CCNH;GPS1;COPS7B;COPS7A;GTF2H2;PRPF19;GTF2H5;COPS4;CUL4A;DDB1;XAB2;CDK7;COPS5;PAPD7;ERCC4;RPA3;POLR2C;TCEA1;POLR2H
protein methylation (GO:0006479)	15/47	0.00285824	0.0847115	-1.75248	10.2653	PRMT6;HSPA8;VCP;PRMT2;EHMT1;CAMKMT;EEF1A1;NSD3;PCMT1;CARM1;EEF2KMT;CALM1;LCMT1;SNRPB;EZH2
regulation of neuron migration (GO:2001222)	8/20	0.00609369	0.140155	-2.00326	10.2177	SHTN1;NIPBL;ADGRG1;ULK4;DAB2IP;PLAA;NSMF;ARHGEF2
protein polyubiquitination (GO:0000209)	63/284	0.000865925	0.0405326	-1.4481	10.2116	LRSAM1;FBXO27;UBE3A;UBE3B;PRPF19;PSMD8;PSMD6;ARIH2;TRIM27;HERC6;MYLIP;FBXW5;FBXW9;FBXO10;FBXW2;DDB2;KLHL42;RNF167;PSMA3;PSMA1;HECW2;PSME4;ANAPC4;ANAPC1;BIRC2;RNF165;RNF31;PSMD11;PSMD14;PSMD13;PELI3;NEDD4L;RNF4;TANK;FBXO41;PSMB4;HECTD1;PSMB5;SHARPIN;RNF213;RNF216;PSMB3;RBBP6;LONRF2;RNF20;SMURF1;FBXL19;FBXO32;CHFR;KLHL20;UBE2W;RNF145;PSMC6;UBE2S;PSMC4;MKRN1;CDC16;FBXL3;TRIP12;BLMH;FBXL5;FBXL4;DZIP3
positive regulation of synaptic transmission, glutamatergic (GO:0051968)	8/19	0.00420543	0.113239	-1.86621	10.2107	CACNG7;CACNG8;RELN;NLGN2;NRXN1;PTK2B;SHANK2;SHANK1
inositol phosphate metabolic process (GO:0043647)	14/48	0.00939939	0.176629	-2.18613	10.2029	IPPK;ISYNA1;ITPK1;PLD4;OCRL;INPP4A;INPP5B;PLCB4;PPIP5K2;INPP5J;PLCH2;CALM1;PLCD1;IP6K2
nuclear pore organization (GO:0006999)	7/16	0.00573708	0.137283	-1.96429	10.1373	NDC1;AHCTF1;NUP107;NUP35;NUP54;NUP153;NUP98
regulation of myeloid cell differentiation (GO:0045637)	21/66	0.000478238	0.0285392	-1.32537	10.133	PRMT6;HSPA9;L3MBTL1;CREBBP;PRKCB;HDAC1;KMT2C;KMT2B;ASH2L;MEIS2;RUNX1;TNRC6C;MOV10;LGALS3;KAT2B;EIF6;AGO3;RBBP5;SIN3A;PAF1;PTK2B
ribosome biogenesis (GO:0042254)	55/227	0.000186881	0.0147369	-1.1753	10.09	RPL4;RPL5;DDX49;NVL;DDX47;WDR3;POP4;NOC2L;RPL6;MTG1;RPS10;RPS13;DIS3L2;UTP15;RPL21;TEX10;PIH1D1;RPL22;DDX56;WDR74;WDR75;CSNK1E;GNL2;EBNA1BP2;XRN2;MRTO4;RPP21;PIH1D2;RPL26;DDX27;RPL10;RPL12;RPL11;HEATR1;MALSU1;RPF1;EMG1;EXOSC5;DHX37;HEATR3;RPL19;UTP6;UTP4;MTERF3;KRR1;DDX31;RRP1B;WDR12;BYSL;RCL1;EIF6;LAS1L;RPL27A;RPS21;RPS24
negative regulation of phosphate metabolic process (GO:0045936)	8/20	0.00609369	0.140155	-1.9615	10.0046	BMP4;PRKRIP1;PLEK;INPP5K;INHA;DYNLL1;BMP7;SIRT1
protein localization to synapse (GO:0035418)	5/11	0.0162162	0.239105	-2.42035	9.97607	NLGN2;DLG4;NRXN1;SCRIB;SHANK1
positive regulation of extracellular matrix disassembly (GO:0090091)	4/8	0.0217253	0.273617	-2.5983	9.94962	MELTF;CLASP1;DDR2;CLASP2
IRES-dependent viral translational initiation (GO:0075522)	5/11	0.0162162	0.239105	-2.41314	9.94634	PTBP1;PCBP2;EIF2D;EIF3D;EIF3B
DNA-templated transcription, termination (GO:0006353)	29/107	0.000927918	0.0422442	-1.41704	9.89456	RBM8A;CCNH;CSTF2;SRSF1;CASC3;MED18;U2AF2;PCF11;SYMPK;POLR2H;TBP;THOC1;THOC3;GTF2H2;MAGOHB;THOC5;GTF2H5;WDR33;SETX;CDK7;DDX39B;POLR1A;POLR1B;SARNP;SRSF4;SRSF5;SRSF6;SRSF7;SNRPB
organophosphate biosynthetic process (GO:0090407)	13/37	0.0020559	0.0685981	-1.5986	9.89062	IPPK;PDXK;GK;TPK1;MOCOS;LPCAT1;GPHN;GPAM;PPIP5K2;PIP5K1A;MOCS1;FADS1;DDR2
lamellipodium organization (GO:0097581)	10/26	0.00311886	0.0888574	-1.69967	9.80757	CYFIP1;SNX2;CTTN;ABLIM3;SPATA13;ARFIP2;CDH13;WHAMM;ARHGEF7;VCL
peptidyl-serine phosphorylation (GO:0018105)	37/146	0.000814936	0.0405326	-1.37796	9.80064	CAMK2B;CAMK2D;MAST3;LRRK2;MAST1;CAMKK1;IKBKB;MAPK9;STK11;TBK1;MKNK1;AKT2;PHKG2;STK38;TLK2;AKT1;CAMK2G;STK32C;MAP2K2;PRKCB;CSNK1A1;NEK6;EIF2AK3;CDC7;CSNK1E;VRK3;MTOR;TGFBR2;ERN1;MAP3K10;ULK1;SGK3;CAMK1;PKN1;GAS6;CAMK1G;ATR
protein deneddylation (GO:0000338)	5/11	0.0162162	0.239105	-2.37294	9.78065	COPS4;COPS5;GPS1;COPS7B;COPS7A
regulation of apoptotic process (GO:0042981)	153/816	0.00206602	0.0685981	-1.57784	9.7544	ANKRD13C;MTCH1;MTCH2;TRIO;PREX1;MAEA;AKT2;RPS6KA1;AKT1;DIP2A;MAP3K4;MAP3K5;MAP2K4;EPHA7;MAP2K2;WNT5A;SCRIB;ACTN4;FBXO10;ATAD3A;CLIP3;SFRP2;SHQ1;BRMS1;MADD;TYRO3;PHIP;NSMF;TNIK;PPID;VCP;BCL10;PSEN1;PIK3R1;KALRN;SOCS2;PRDX2;ABR;DDRGK1;SUDS3;NTSR1;IP6K2;MAP2K6;HSPA9;CREBBP;TGFB2;XBP1;PLK5;BRAF;BMP7;NFKB1;KLHL20;SETX;NET1;BMP4;BMP3;AHI1;COPS5;JMY;MAP3K10;NF2;FGFR3;FGFR2;ITGB1;RBM25;FLT1;PPP1R13B;TRAD…
morphogenesis of a polarized epithelium (GO:0001738)	4/8	0.0217253	0.273617	-2.51461	9.62914	RAB10;AHI1;TRAF3IP1;FUZ
RNA export from nucleus (GO:0006405)	33/120	0.000322118	0.0215526	-1.19653	9.62078	FYTTD1;POM121;NUP107;RBM8A;DDX25;SRSF1;CASC3;NXF1;U2AF2;NUP85;XPO5;SYMPK;NUP88;RAE1;SRSF10;NDC1;RANBP1;RANBP3;THOC1;NUP153;THOC3;MAGOHB;THOC5;WDR33;DDX39B;SARNP;NUP35;NUP54;SRSF4;NUP98;SRSF5;SRSF6;SRSF7
positive regulation of excitatory postsynaptic potential (GO:2000463)	8/20	0.00609369	0.140155	-1.88439	9.61132	STX1B;RELN;NLGN2;DLG4;NRXN1;PTK2B;SHANK2;SHANK1
regulation of DNA damage checkpoint (GO:2000001)	5/11	0.0162162	0.239105	-2.32817	9.59614	ETAA1;DDX39B;CRY1;THOC1;THOC5
regulation of synapse maturation (GO:0090128)	5/11	0.0162162	0.239105	-2.32769	9.59416	CAMK2B;RELN;ARHGEF15;NRXN1;DAB2IP
ribosomal large subunit biogenesis (GO:0042273)	20/64	0.000834972	0.0405326	-1.35181	9.58178	RPL5;WDR37;RPL10;RPL12;RPL11;NOP2;WDR74;MALSU1;WDR12;NOC2L;RPL6;RPF1;RSL1D1;EBNA1BP2;EIF6;LAS1L;MRTO4;HEATR3;RPL26;NOP53
modulation of excitatory postsynaptic potential (GO:0098815)	10/26	0.00311886	0.0888574	-1.65758	9.56472	STX1B;MTMR2;RELN;NLGN2;DLG4;LRRK2;NRXN1;PTK2B;SHANK2;SHANK1
RNA 3'-end processing (GO:0031123)	20/62	0.000529667	0.0309781	-1.26781	9.56346	PNPT1;RBM8A;CSTF2;SRSF1;THOC1;THOC3;CASC3;MAGOHB;THOC5;WDR33;SUPV3L1;DDX39B;U2AF2;PCF11;SARNP;SYMPK;SRSF4;SRSF5;SRSF6;SRSF7
internal peptidyl-lysine acetylation (GO:0018393)	10/27	0.00429276	0.11489	-1.75354	9.55822	BAG6;MORF4L1;KAT2B;CREBBP;TRRAP;KAT6B;RUVBL2;KAT6A;KANSL3;SGF29
mRNA transport (GO:0051028)	30/105	0.000289101	0.0212778	-1.17219	9.55186	FYTTD1;POM121;NUP107;RBM8A;DDX25;SRSF1;CASC3;NXF1;U2AF2;NUP85;SYMPK;NUP88;RAE1;SRSF10;NDC1;THOC1;NUP153;THOC3;MAGOHB;THOC5;WDR33;DDX39B;SARNP;NUP35;NUP54;SRSF4;NUP98;SRSF5;SRSF6;SRSF7
positive regulation of mRNA processing (GO:0050685)	7/17	0.00849899	0.166932	-2.00122	9.54141	SNW1;THRAP3;TRA2B;CELF3;PAF1;NUP98;RBMX
nucleotide-excision repair, DNA incision, 3'-to lesion (GO:0006295)	9/23	0.00436087	0.11601	-1.74946	9.50847	CUL4A;DDB1;PARP1;ERCC4;RPA3;CHD1L;GTF2H2;GTF2H5;DDB2
mitotic nuclear envelope disassembly (GO:0007077)	15/45	0.00176235	0.060801	-1.49901	9.50541	NDC1;POM121;NUP107;PRKCB;NEK6;NUP153;CCNB2;NUP85;CNEP1R1;LMNA;NUP35;NUP54;NUP88;NUP98;RAE1
regulation of spindle organization (GO:0090224)	8/19	0.00420543	0.113239	-1.73604	9.49856	SENP6;BORA;NUMA1;DCTN1;CLTC;FSD1;RNF4;RAE1
histone H4 acetylation (GO:0043967)	17/48	0.000402373	0.0257519	-1.21208	9.47619	MEAF6;PHF20;TRRAP;ACTL6A;CHD5;JADE2;HCFC1;ING4;MORF4L1;PER1;KANSL1;KANSL2;RUVBL2;KANSL3;TADA3;EP400;EPC1
protein import (GO:0017038)	18/57	0.00130334	0.0509534	-1.42451	9.46275	RPAIN;RANBP1;POM121;IPO11;NUP107;RANBP3;RANBP17;NUP153;PTTG1IP;MCM3AP;IPO9;NUP85;LAMP2;HEATR3;NUP88;NUP98;RAE1;TNPO3
regulation of phosphorylation of RNA polymerase II C-terminal domain (GO:1901407)	5/12	0.0244017	0.285513	-2.54515	9.4504	CCNH;CCNC;CCNL1;PPIL4;BRD4
positive regulation of glucose import in response to insulin stimulus (GO:2001275)	5/11	0.0162162	0.239105	-2.278	9.38935	OSBPL8;RARRES2;PIK3R2;PIK3R1;SORBS1
carbohydrate phosphorylation (GO:0046835)	5/12	0.0244017	0.285513	-2.52537	9.37697	IPPK;TKFC;ITPK1;POMK;HK1
protein localization to mitochondrion (GO:0070585)	5/11	0.0162162	0.239105	-2.27033	9.35774	DNAJA1;MTCH2;LRRK2;AKT1;HK1
regulation of axon guidance (GO:1902667)	6/14	0.0118005	0.201981	-2.10557	9.34791	NRP1;PLXNA2;ZSWIM8;ZSWIM6;ZSWIM4;PLXNA3
histone deubiquitination (GO:0016578)	8/20	0.00609369	0.140155	-1.82808	9.32412	ENY2;USP15;USP16;TRRAP;TAF10;USP3;USP22;BRCC3
gene silencing by miRNA (GO:0035195)	11/32	0.00539586	0.135387	-1.78461	9.31947	TNRC6C;MOV10;CNOT6;EIF6;ZC3H7A;AGO3;CNOT1;XPO5;ADAR;DICER1;TARBP2
endosomal transport (GO:0016197)	53/230	0.000865742	0.0405326	-1.32109	9.31625	ZFYVE9;CLTC;TOM1;DENND5A;TRIM27;VPS36;SCYL2;VPS18;AKTIP;VPS13A;SCRIB;ATG14;BET1L;DOPEY1;DOPEY2;WDR81;TBC1D5;RAB35;STAM2;TMEM87A;TSG101;DCTN1;GOSR2;TGFBRAP1;GOSR1;PIK3R4;CLEC16A;VPS26A;TRAK1;HMGXB4;SNX2;VPS52;MVB12B;STX6;VPS11;VPS54;SNX5;SNX6;ANKRD27;VTA1;GBF1;HOOK3;KLHL20;RGP1;RAB10;NSG2;MYO5B;VPS41;CHMP2A;UBAP1;VIPAS39;CORO7;PICALM
regulation of mitochondrial translation (GO:0070129)	6/16	0.024074	0.285513	-2.48273	9.25219	MTG1;ALKBH1;FASTKD3;NSUN3;RMND1;MALSU1
organelle assembly (GO:0070925)	82/377	0.000312398	0.0215168	-1.14344	9.22897	TTC26;CEP126;UBXN2B;TRAF3IP1;UBXN2A;IFT172;FNBP1L;CDC14A;CDC14B;GOLGA2;IFT52;POGZ;DZIP1L;BBS9;TEKT3;BBS7;SYNPO;VPS36;SNAP29;BBS4;DYNC2H1;ATG3;MKKS;PDCD6IP;IST1;TMOD2;CIRBP;RFX3;IFT80;OCRL;DYNLL1;ATG14;KIF27;PATL1;IFT88;NCOR1;RAB35;ATG4C;ATG4B;ULK1;ATG4A;CEP63;IFT46;STAM2;MYH6;TSG101;HDAC3;INTU;WDR45B;RAB1B;ASAP1;IFT74;ATXN2;ABLIM3;STK36;TMEM67;TCTEX1D2;NPHP3;FLNA;CFAP20;BBS2;CENPT;GSN;MTERF3;NEK6…
cyclic nucleotide metabolic process (GO:0009187)	9/26	0.0109165	0.190542	-2.04124	9.22125	GUCY1A2;ADCY9;ADCY2;ADCY1;ADCY8;ADCY7;ADCY6;PDE9A;ADCY5
establishment of protein localization to mitochondrion (GO:0072655)	15/50	0.00550195	0.137269	-1.77172	9.21766	DNAJC19;TOMM20L;AIP;TIMM44;TIMM22;MFF;TOMM40L;HSPD1;TIMM50;HK1;CHCHD4;PITRM1;TIMM17A;MFN2;AKT1
transcription-dependent tethering of RNA polymerase II gene DNA at nuclear periphery (GO:0000972)	4/8	0.0217253	0.273617	-2.39775	9.18165	NUP107;LDB1;NUP98;RAE1
establishment of melanosome localization (GO:0032401)	7/19	0.0167442	0.240073	-2.23927	9.15794	BBS2;MKKS;SHROOM2;MYO5A;BBS7;BBS4;RAB11A
methionine metabolic process (GO:0006555)	5/12	0.0244017	0.285513	-2.46562	9.1551	AHCYL1;MTRR;MTHFD1;MTHFR;MTR
intraciliary transport (GO:0042073)	15/47	0.00285824	0.0847115	-1.55313	9.09754	DYNC2H1;TTC26;TRAF3IP1;IFT172;IFT80;DYNLL1;KIF17;ICK;IFT52;IFT74;IFT88;TTC21B;KIFAP3;IFT46;CLUAP1
global genome nucleotide-excision repair (GO:0070911)	11/33	0.00700988	0.155556	-1.83183	9.08666	CUL4A;DDB1;PARP1;ERCC4;CETN2;SUMO3;SUMO2;CHD1L;GTF2H2;GTF2H5;DDB2
regulation of Ras protein signal transduction (GO:0046578)	23/91	0.0075415	0.158479	-1.85406	9.06141	GIT2;TGFB2;RDX;DAB2IP;AGAP2;ARAP3;RASAL1;MYO9B;ASAP1;AGAP3;RASAL3;ARFGAP1;ARFGAP2;SYNGAP1;RASA3;MADD;SPRY2;MFN2;ARHGEF2;STAMBP;FBP1;GIT1;APPL1
regulation of protein dephosphorylation (GO:0035304)	13/41	0.00566911	0.137283	-1.75001	9.05229	YWHAB;GBA;HTT;SPPL3;PPP6R1;SMPD1;CNEP1R1;PPP1R8;PPP6R3;SYMPK;PIN1;NSMF;CALM1
RNA secondary structure unwinding (GO:0010501)	15/47	0.00285824	0.0847115	-1.5415	9.02943	DDX17;DDX5;DDX27;HELQ;DDX49;DHX9;DDX47;DDX25;DDX55;DDX56;DDX31;DDX21;DDX41;DDX39B;AGO3
coenzyme A biosynthetic process (GO:0015937)	4/8	0.0217253	0.273617	-2.3553	9.0191	PANK2;ACOT7;PPCS;ACAT1
negative regulation of cilium assembly (GO:1902018)	4/9	0.0345045	0.32971	-2.67585	9.0087	TCHP;TBC1D30;MAP4;CEP97
positive regulation of extracellular matrix assembly (GO:1901203)	4/9	0.0345045	0.32971	-2.67549	9.00747	PHLDB1;DAG1;CLASP1;CLASP2
miRNA loading onto RISC involved in gene silencing by miRNA (GO:0035280)	4/8	0.0217253	0.273617	-2.35059	9.00106	AGO3;ADAR;DICER1;TARBP2
positive regulation of dendritic spine development (GO:0060999)	8/21	0.00856135	0.167287	-1.88925	8.99378	CAMK2B;RELN;CAPRIN1;DLG5;CAMK1;PSEN1;SHANK2;SHANK1
mRNA 3'-end processing (GO:0031124)	22/75	0.00121294	0.0500591	-1.33748	8.98079	AHCYL1;RBM8A;ZC3H3;CSTF2;SRSF1;THOC1;THOC3;CASC3;MAGOHB;THOC5;WDR33;DDX39B;U2AF2;PCF11;SARNP;SYMPK;PAF1;SRSF4;SRSF5;MTPAP;SRSF6;SRSF7
regulation of smoothened signaling pathway (GO:0008589)	13/37	0.0020559	0.0685981	-1.44955	8.96843	CREBBP;INTU;PTCH2;TULP3;TUBD1;FUZ;RORA;ANKMY2;STK36;RAB34;DLG5;SUFU;FGFR2
cAMP metabolic process (GO:0046058)	9/25	0.00821731	0.163458	-1.85471	8.90542	ADCY9;PDE4D;PDE4A;ADCY2;ADCY1;ADCY8;ADCY7;ADCY6;ADCY5
regulation of small GTPase mediated signal transduction (GO:0051056)	36/141	0.00082183	0.0405326	-1.24663	8.85604	TRIO;FAM13B;ARHGAP18;PIK3R2;ARHGAP39;KALRN;FGD1;RHOBTB1;ARHGAP4;INPP5B;GNA13;ARHGAP21;PREX1;ABR;FGD4;RELN;SRGAP1;ARHGEF12;PLEKHG5;ARHGEF17;ARAP3;MYO9B;OCRL;GMIP;ARHGAP26;ARHGAP25;VAV1;BCR;NET1;ARHGAP10;DEPDC1B;ARHGEF1;ARHGEF2;ARHGEF7;SOS2;RHOQ
regulation of GTPase activity (GO:0043087)	46/189	0.000540152	0.0309781	-1.17618	8.84921	GPSM1;ITGB1;LRRK2;RASGRP2;RAP1GAP;RASIP1;FGD1;DOCK10;ARHGAP21;ABR;FGD4;FGD5;SIPA1L1;RAP1A;TBC1D30;PLXNA2;CCL17;BVES;HRAS;S100A10;PLXNA3;SEMA4D;ARHGEF37;RDX;DAB2IP;OCRL;RRP1B;GMIP;VAV1;RGP1;BCR;NET1;TBC1D2;RGS10;PIN1;PKP4;PRTN3;GNB5;AGRN;ARHGEF7;CRK;RAPGEF6;RAB3GAP1;RAPGEF3;EZH2;PICALM
ventricular trabecula myocardium morphogenesis (GO:0003222)	4/9	0.0345045	0.32971	-2.60387	8.76637	DLL4;TGFB2;NRG1;RBPJ
coenzyme biosynthetic process (GO:0009108)	11/30	0.00304805	0.0882909	-1.50957	8.74535	PANK2;PDXK;ACOT7;PPCS;TPK1;MAT2B;LIAS;MOCS1;GPHN;MMADHC;ACAT1
positive regulation of protein dephosphorylation (GO:0035307)	11/32	0.00539586	0.135387	-1.67	8.72096	SMPD1;CNEP1R1;GBA;MAGI2;SYMPK;PIN1;NSMF;DUSP26;CALM1;SPPL3;MTOR
regulation of cellular response to stress (GO:0080135)	28/105	0.00147286	0.0551198	-1.33121	8.68022	CAMK2B;CAMK2D;POM121;NUP107;USP19;BAG2;NUP85;HSF1;NUP88;RAE1;CAMK2G;NDC1;HSPA8;CREBBP;PNPT1;NEK6;PTGES3;NUP153;EIF2AK4;SIRT1;MTOR;RSL1D1;DNAJC7;RPA3;NUP35;NUP54;NUP98;ATR
regulation of production of miRNAs involved in gene silencing by miRNA (GO:1903798)	6/14	0.0118005	0.201981	-1.95242	8.66797	NCOR2;BMP4;DDX5;MAP2K2;NCOR1;EGFR
collagen metabolic process (GO:0032963)	5/13	0.0348304	0.32971	-2.57577	8.64754	COL1A1;TNXB;P3H1;VIPAS39;P3H4
positive regulation of mesenchymal cell proliferation (GO:0002053)	5/12	0.0244017	0.285513	-2.3125	8.58655	CHRD;LRP5;PDGFA;FGFR2;TGFBR2
positive regulation of transcription of Notch receptor target (GO:0007221)	7/18	0.0121247	0.204361	-1.94462	8.58065	KAT2B;NOTCH3;CREBBP;SNW1;WWC1;RBPJ;DLGAP5
histone H2A acetylation (GO:0043968)	7/17	0.00849899	0.166932	-1.79174	8.54267	MORF4L1;MEAF6;TRRAP;RUVBL2;ACTL6A;EP400;EPC1
regulation of lipid transport (GO:0032368)	4/9	0.0345045	0.32971	-2.53518	8.5351	DISP3;NCOR1;LRP1;NR1H2
DNA metabolic process (GO:0006259)	68/315	0.00119141	0.0500591	-1.26621	8.52491	RPAIN;MUS81;ACHE;TOP2B;TRRAP;HMGB1;RBPJ;ING4;ING5;ENDOV;TATDN2;TRIM28;ALKBH1;TOPBP1;RFC5;TOP3B;TIPIN;LIG1;PARP1;NCOA6;PARP2;USP3;ATRX;TOP3A;GLRX2;CHD1L;AXIN2;CSNK1E;TERF2;SIRT1;TSN;DDB2;SUPV3L1;DDB1;DBF4;PAPD7;MSH2;GRWD1;PSME4;NUP98;EXD2;VCP;BLM;DNMT1;HDAC1;TYMS;RAD51AP1;TBRG1;RECQL4;ORC4;RECQL5;RNASEH1;ORC6;CBS;ERI3;NT5M;MBD3;DUT;PTGES3;XRCC3;CDC7;MTOR;RAD52;ERCC4;RPA3;TDP1;NOP53;ATR
sulfur amino acid biosynthetic process (GO:0000097)	4/8	0.0217253	0.273617	-2.21939	8.49866	MTRR;MTHFD1;CBS;MTR
positive regulation of microtubule motor activity (GO:2000576)	3/7	0.0747211	0.480304	-3.26561	8.47097	MTCL1;DYNLL1;DNAL4
regulation of hemopoiesis (GO:1903706)	5/12	0.0244017	0.285513	-2.27689	8.45433	LGALS3;CREBBP;PRKCB;EIF2AK2;RUNX1
DNA duplex unwinding (GO:0032508)	13/42	0.00709845	0.155954	-1.70463	8.43432	BLM;PARP1;DHX9;CETN2;CHD1L;GTF2H2;GTF2H5;DDB2;CUL4A;SUPV3L1;RECQL4;DDB1;RECQL5
cellular protein localization (GO:0034613)	72/328	0.000533836	0.0309781	-1.11719	8.4185	RAB3B;ZFYVE9;LRRK2;CLTC;PTPRK;PRPF19;HID1;NIPBL;TBC1D30;ARFIP2;EIF2D;TMED7;BBS4;CEP68;NSF;TMED9;MIOS;WNT5A;TBC1D8;ANK2;TBC1D2B;AXIN2;STX1B;TBC1D2;RAB31;CTTN;TBC1D5;RAB34;RAB35;ADPRH;ERP29;TBC1D25;PICK1;KDELR2;ARHGEF2;VCL;NAPA;COPB2;TBC1D9B;WDR45B;RAB1B;VPS26A;EGFR;GGA2;RAB21;GGA1;DSCR3;GGA3;STX6;MFN2;FLNA;STX3;SNX8;SEC31A;SNX6;BBS2;SMURF1;GRTP1;SYNRG;AP3D1;TRAPPC8;RAB11A;ARCN1;SGSM1;RAB10;TBCK;AH…
tRNA metabolic process (GO:0006399)	7/19	0.0167442	0.240073	-2.05774	8.41555	GTF3C1;KARS;POP1;POP4;RPP21;FARS2;AARS
deadenylation-dependent decapping of nuclear-transcribed mRNA (GO:0000290)	4/9	0.0345045	0.32971	-2.49105	8.38652	LSM1;DCPS;PATL1;DCP1B
negative regulation of autophagy (GO:0010507)	14/47	0.00770421	0.158479	-1.71953	8.36722	KDM4A;LRRK2;MTMR9;MTOR;SIRT2;RASIP1;GOLGA2;DAP;SNRNP70;TLK2;ZKSCAN3;AKT1;TAB2;ZKSCAN4
positive regulation of transcription from RNA polymerase II promoter (GO:0045944)	155/849	0.00554344	0.137283	-1.6054	8.34028	ATF1;CRTC2;PID1;KDM1A;CCNH;WWC1;PRDM2;CCNC;RORA;GABPB1;RBPJ;ELK3;DCAF6;TBK1;SALL2;RUVBL2;ZMIZ2;RPS6KA1;EPC1;CCNL1;ACVR1;DDX17;MLIP;WNT5A;RFX3;EBF4;GTF2F2;RUNX1;NPAS4;SFRP2;TBPL1;PHIP;PGR;NOTCH3;DHX9;PIK3R2;PIK3R1;DDRGK1;CAMTA1;SCAP;OTX1;ZBTB17;CREBBP;TGFB2;EGR2;XBP1;POU2F1;AUTS2;SS18L1;ECD;EAF2;MICAL2;PBX2;GLMP;NFKB1;SMARCA4;SETX;BMP4;MLLT10;CDK8;AHI1;CDK7;COPS5;SNW1;FUBP3;SP1;PAF1;PIN1;TCF3;FGFR…
cellular response to gamma radiation (GO:0071480)	7/18	0.0121247	0.204361	-1.87582	8.27707	KDM1A;HSF1;TLK2;TMEM109;RPL26;HRAS;ATR
double-strand break repair via homologous recombination (GO:0000724)	20/77	0.00893448	0.170813	-1.75127	8.2622	MUS81;EXD2;BLM;HELQ;PARP1;FBXO18;PSMD14;POLN;XRCC3;CDC7;RAD51AP1;RAD52;YY1;RECQL4;MORF4L1;MMS22L;NIPBL;RECQL5;ERCC4;RPA3
microtubule anchoring at microtubule organizing center (GO:0072393)	5/12	0.0244017	0.285513	-2.21914	8.23989	NIN;DCTN1;HOOK3;BBS4;BICD2
purine nucleotide biosynthetic process (GO:0006164)	4/8	0.0217253	0.273617	-2.14913	8.22963	PRPS1;MTHFD1;PPAT;AMPD2
protein alkylation (GO:0008213)	10/30	0.00996778	0.181965	-1.78358	8.21946	EEF1A1;HSPA8;PCMT1;VCP;PRMT2;EEF2KMT;CALM1;LCMT1;SNRPB;CAMKMT
regulation of cellular response to heat (GO:1900034)	23/79	0.00106336	0.0464932	-1.20046	8.21871	CAMK2B;NDC1;HSPA8;CREBBP;CAMK2D;POM121;NUP107;PTGES3;NUP153;SIRT1;MTOR;BAG2;DNAJC7;NUP85;RPA3;HSF1;NUP35;NUP54;NUP88;NUP98;RAE1;CAMK2G;ATR
regulation of cation channel activity (GO:2001257)	22/72	0.000662382	0.0352419	-1.11926	8.19264	CAMK2D;NLGN2;HOMER1;KCNIP2;PDE4D;MINK1;ANK2;SHISA9;SHISA7;CACNB1;CACNG7;CACNG8;CACNB3;DLG1;RELN;DLG4;SLMAP;PTK2B;CALM1;SHANK2;VAMP2;SHANK1
pore complex assembly (GO:0046931)	6/15	0.0171976	0.244196	-2.0142	8.18364	NDC1;AHCTF1;NUP107;NUP153;ANO6;NUP98
mitochondrial gene expression (GO:0140053)	15/46	0.0022557	0.0721003	-1.34194	8.17817	MRPS17;NDUFA7;PNPT1;MRPS24;MTERF3;GFM2;MRPL16;MRPS21;TFB2M;POLRMT;QRSL1;MRPS7;HARS2;LARS2;TEFM
peptide biosynthetic process (GO:0043043)	39/175	0.00698872	0.155556	-1.63588	8.11962	MRPS17;RPL4;RPL5;HBS1L;RPL10;MRPS14;RPL12;MRPS33;RPL11;TARS;RRBP1;MRPL13;RPL6;MRPL32;MRPL3;MRPL42;IGF2BP3;MRPL9;RPS10;RPS13;RPL19;WARS;RPL21;MRPS24;PABPC4;RPL22;MRPS21;MRPS7;HARS2;EEF1A1;RSL1D1;MRPS9;COPS5;RPL27A;RPS6KB2;RPL26;RPS21;RPS24;FARSB
cytoskeleton organization (GO:0007010)	33/127	0.000958928	0.0431903	-1.1648	8.09501	MAST3;MAST1;FGD1;ARHGAP4;SYNE1;FGD4;ZMYM1;FGD5;STRIP2;ZMYM3;PPP2R3C;DAG1;PACSIN3;PTK2B;PDZD8;SH3D19;PAK4;SUN1;TPM1;MICAL2;ARAP3;CDC42BPB;ANK1;KLHL20;ARHGAP10;PHIP;TNIK;TLN1;BRWD1;OBSL1;RHOQ;SIPA1;SHANK1
regulation of mRNA stability (GO:0043488)	31/129	0.00490303	0.126619	-1.52093	8.08814	PSMD11;PSMD14;FASTKD1;YWHAB;PSMD13;FASTKD3;GIGYF2;TBRG4;PSMD8;PSMB4;EXOSC5;PSMD6;LARP1;FXR2;PSMB5;PCBP4;PSMB3;KHSRP;AKT1;IGF2BP3;ZC3H14;HSPA8;CIRBP;AXIN2;PSMA3;PSMC6;PSMA1;XRN1;THRAP3;PSMC4;PSME4
negative regulation of axon regeneration (GO:0048681)	3/8	0.106519	0.549517	-3.60342	8.06964	PTPRS;INPP5F;CERS2
telencephalon cell migration (GO:0022029)	3/7	0.0747211	0.480304	-3.10836	8.06306	LRRK2;FGF13;PEX13
establishment of protein localization to chromatin (GO:0071169)	4/9	0.0345045	0.32971	-2.38844	8.04108	NIPBL;PIH1D1;RUVBL2;SGF29
regulation of intracellular steroid hormone receptor signaling pathway (GO:0033143)	10/28	0.0057886	0.137432	-1.55374	8.00467	DDX5;PRMT2;GPAM;DDRGK1;CARM1;UBA5;TRIM68;SAFB2;ARRB2;RUNX1
positive regulation of GTPase activity (GO:0043547)	46/193	0.000871966	0.0405326	-1.13409	7.98936	ITGB1;TBC1D9B;DOCK7;RASGRP2;RAP1GAP;DOCK10;ARHGAP21;ABR;ARHGAP42;SIPA1L1;RAP1A;TBC1D30;PIP5K1A;CCL17;HRAS;S100A10;SEMA4D;ARHGEF37;GRTP1;TBC1D8;MTSS1L;FOXJ1;TBC1D2B;SCRIB;RANGAP1;SGSM1;RGP1;BCR;NET1;TBCK;TBC1D2;TBC1D5;ADPRH;RGS10;PIN1;TBC1D25;PKP4;PRTN3;GNB5;AGRN;ARHGEF7;RAPGEF6;RAB3GAP1;RAPGEF3;EZH2;PICALM
viral mRNA export from host cell nucleus (GO:0046784)	4/9	0.0345045	0.32971	-2.36062	7.94743	DDX39B;THOC1;THOC3;THOC5
positive regulation of production of miRNAs involved in gene silencing by miRNA (GO:1903800)	4/9	0.0345045	0.32971	-2.35501	7.92853	BMP4;DDX5;MAP2K2;EGFR
melanosome localization (GO:0032400)	7/21	0.0294381	0.320193	-2.23717	7.88707	BBS2;MKKS;SHROOM2;MYO5A;BBS7;BBS4;RAB11A
ribosomal large subunit assembly (GO:0000027)	10/31	0.0127669	0.211156	-1.80316	7.8634	RPL5;RPL10;FASTKD2;RPL12;RPL11;MRTO4;NOP2;NOP53;RPL6;RPF1
regulation of cellular protein catabolic process (GO:1903362)	6/18	0.0427918	0.37444	-2.48797	7.84062	RGP1;RDX;DAB2IP;VPS11;PTTG1IP;DACT1
histone H4 deacetylation (GO:0070933)	4/9	0.0345045	0.32971	-2.32013	7.81109	HDAC4;HDAC2;HDAC1;SIRT2
ribonucleoside bisphosphate biosynthetic process (GO:0034030)	4/8	0.0217253	0.273617	-2.02971	7.77234	PANK2;ACOT7;PPCS;ACAT1
protein targeting (GO:0006605)	32/134	0.00476521	0.123783	-1.44838	7.74364	GOSR2;RPL11;PIK3R4;KATNB1;MFF;TRAK1;ZDHHC4;PITRM1;LAMP2;TIMM17A;MFN2;LONP2;AP1M2;DNAJC19;PEX16;ATG3;TMEM50A;TMEM50B;HPS4;AP3D1;VPS13A;AIP;TIMM44;TIMM22;SRP68;PEX12;SORL1;TAOK2;VPS41;ATG4C;ATG4B;ATG4A
positive regulation of cellular response to insulin stimulus (GO:1900078)	6/16	0.024074	0.285513	-2.06842	7.70824	OSBPL8;RARRES2;PIK3R2;PIK3R1;SORBS1;SIRT1
receptor clustering (GO:0043113)	9/25	0.00821731	0.163458	-1.60398	7.70153	DLG1;DLG4;NRXN1;DVL1;MAGI2;FLNA;PICK1;SCRIB;AGRN
regulation of mitotic cell cycle (GO:0007346)	40/166	0.00146535	0.0551198	-1.17266	7.65236	L3MBTL1;BTG3;NUMA1;DCTN1;CLTC;SLC9A3R1;BRINP2;MAEA;BRINP1;HSF1;FSD1;RAE1;MAP3K4;MAP4K3;MAP4K4;PAK4;MAP2K6;MAP2K4;MAP4K2;MAP2K2;BORA;NEK6;USP22;MINK1;GBF1;SCRIB;MEIS2;CDK11B;SIRT1;CDC25B;DDB1;CDK8;DLG1;RBL1;RPS6KB1;TAOK2;CDC16;PIN1;TNIK;OBSL1
termination of RNA polymerase II transcription (GO:0006369)	20/69	0.00232061	0.0726794	-1.25861	7.63464	RBM8A;CSTF2;SRSF1;THOC1;THOC3;CASC3;MAGOHB;THOC5;MED18;WDR33;DDX39B;U2AF2;PCF11;SARNP;SYMPK;SRSF4;SRSF5;SRSF6;SRSF7;SNRPB
protein complex localization (GO:0031503)	8/23	0.0156227	0.239105	-1.83345	7.62537	ICK;IFT52;IFT74;TTC26;DLG1;MIOS;TRAF3IP1;IFT46
regulation of coenzyme metabolic process (GO:0051196)	12/40	0.0123863	0.206407	-1.73448	7.61638	NDC1;POM121;NUP107;EIF6;NUP85;ECD;NUP35;NUP54;NUP88;NUP153;NUP98;RAE1
JNK cascade (GO:0007254)	20/67	0.00157076	0.0567072	-1.17129	7.56205	MAP2K4;MAP4K2;DAXX;RIPK2;GPS1;MINK1;WNT5A;DAB2IP;GPS2;CRKL;ERN1;MAPK9;MAP3K10;TAB2;TNIK;PKN1;TAB1;MAP3K13;MAP4K3;MAP3K5
regulation of endoplasmic reticulum unfolded protein response (GO:1900101)	4/10	0.0507852	0.401635	-2.53592	7.55743	ERN1;XBP1;COPS5;PIK3R1
microvillus assembly (GO:0030033)	4/9	0.0345045	0.32971	-2.24207	7.5483	SLC9A3R1;TNIK;FXYD5;RAPGEF6
regulation of protein binding (GO:0043393)	28/112	0.0040608	0.111382	-1.36397	7.51052	HDAC4;HDAC5;KDM1A;LRP1;LRRK2;RPL11;PSEN1;SPPL3;ADD1;ACTB;AURKA;DNAJB2;GOLGA2;DVL1;HSF1;AKT1;DACT1;RIPK2;AKTIP;DAB2IP;NRG1;CSNK1E;SORL1;BMP4;PIN1;TMBIM6;CAMK1;CRK
regulation of neurotransmitter receptor activity (GO:0099601)	11/34	0.00897713	0.170875	-1.59119	7.49938	CACNG7;CACNG8;RELN;NLGN2;DLG4;MINK1;PTK2B;SHISA9;SHANK2;SHISA7;SHANK1
retrograde vesicle-mediated transport, Golgi to ER (GO:0006890)	21/81	0.00767159	0.158479	-1.53931	7.4968	NAPA;NSF;COPB2;TMED9;COPB1;RAB1B;GBF1;HTT;KIF22;KLC1;ARFGAP1;BICD2;ARFGAP2;ARCN1;TAPBP;KIF2A;BNIP1;PICK1;KDELR2;KIFAP3;TMED7
cellular response to misfolded protein (GO:0071218)	8/22	0.0117056	0.201981	-1.68448	7.49204	POMT2;BAG6;UBE2W;ATXN3;VCP;KLHL15;POMT1;UGGT1
regulation of wound healing, spreading of epidermal cells (GO:1903689)	3/7	0.0747211	0.480304	-2.88454	7.48248	CLASP1;MTOR;CLASP2
negative regulation of transcription, DNA-templated (GO:0045892)	149/814	0.00586353	0.137805	-1.45488	7.47662	TCERG1;KDM1A;HDAC10;MYT1L;WWC1;NAB2;ATN1;EHMT1;RBPJ;NOC2L;ELK3;YY1;CHCHD3;TRIM28;SALL2;SAP130;EPC1;TRIM27;DAXX;MLIP;NKX6-2;ZGPAT;SMARCC2;RBFOX2;SFMBT1;WNT5A;RFX3;DICER1;HCFC1;ILF3;SFRP2;BRMS1;KAT6B;KAT6A;PPID;L3MBTL1;DDX5;NEDD4L;PSEN1;ZBTB2;HMBOX1;ATXN1;HIVEP1;ZKSCAN3;INPP5K;SUDS3;SNX6;HSPA8;CREBBP;POU2F1;MTERF3;BCL11A;PHF12;NR2F1;RITA1;NR2F2;BMP7;NFKB1;SMARCA4;BMP4;DRAP1;DAP;DLG1;SNW1;YEATS2;CNO…
microvillus organization (GO:0032528)	4/9	0.0345045	0.32971	-2.21551	7.45887	SLC9A3R1;TNIK;FXYD5;RAPGEF6
nucleotide-excision repair, DNA incision, 5'-to lesion (GO:0006296)	11/38	0.0213271	0.273617	-1.93017	7.42687	RFC5;CUL4A;DDB1;PARP1;PAPD7;ERCC4;RPA3;CHD1L;GTF2H2;GTF2H5;DDB2
cilium organization (GO:0044782)	44/193	0.0028057	0.0847115	-1.26065	7.40771	TTC26;CEP126;INTU;TRAF3IP1;IFT172;ASAP1;FNBP1L;CDC14A;CDC14B;IFT52;IFT74;ABLIM3;STK36;TMEM67;TCTEX1D2;DZIP1L;BBS9;NPHP3;FLNA;TEKT3;BBS7;SNAP29;CFAP20;BBS4;CEP78;BBS2;DYNC2H1;MKKS;GSN;FOXJ1;RFX3;IFT80;FUZ;OCRL;DYNLL1;KIF27;ICK;AHI1;IFT88;TMEM237;MKS1;B9D1;IFT46;CLUAP1
N-acetylneuraminate catabolic process (GO:0019262)	3/7	0.0747211	0.480304	-2.85319	7.40115	NAGK;GNPDA2;AMDHD2
response to forskolin (GO:1904321)	4/9	0.0345045	0.32971	-2.19659	7.39519	ADCY2;ADCY1;ADCY6;ADCY5
peptidyl-arginine methylation, to asymmetrical-dimethyl arginine (GO:0019919)	4/9	0.0345045	0.32971	-2.19565	7.39202	PRMT6;PRMT2;CARM1;PRMT9
autophagosome assembly (GO:0000045)	17/59	0.00510747	0.131131	-1.39474	7.36013	ATG3;UBXN2B;SMURF1;UBXN2A;WDR45B;RAB1B;TRAPPC8;ATG14;NSFL1C;ATG16L2;ATG16L1;RAB35;ATG4C;MFN2;ATG4B;ULK1;ATG4A
neurotransmitter receptor diffusion trapping (GO:0099628)	4/9	0.0345045	0.32971	-2.18076	7.3419	CACNG7;CACNG8;DLG4;GPHN
receptor localization to synapse (GO:0097120)	7/19	0.0167442	0.240073	-1.79395	7.33673	CACNG7;CACNG8;DLG1;DLG4;SCRIB;KIF17;GPHN
regulation of primary metabolic process (GO:0080090)	35/140	0.00143308	0.054556	-1.11886	7.32619	SLC27A1;SMARCD3;PSMD11;HDAC3;PSMD14;LRP1;PSMD13;CHD9;ODC1;PSMD8;LACTB;PSMB4;PSMD6;PSMB5;SIN3B;SIN3A;PSMB3;OPA3;ACADM;BBS4;FADS1;NCOA1;CREBBP;NCOA6;ACSL1;GRHL1;NCOR2;PSMA3;PSMC6;NCOR1;PSMA1;PSMC4;CARM1;PSME4;PLIN2
histone H3-K9 demethylation (GO:0033169)	5/13	0.0348304	0.32971	-2.18016	7.31939	KDM4A;KDM3A;KDM3B;KDM1A;JMJD1C
regulation of AMPA receptor activity (GO:2000311)	9/25	0.00821731	0.163458	-1.52331	7.31417	CACNG7;CACNG8;RELN;NLGN2;MINK1;SHISA9;SHANK2;SHISA7;SHANK1
MAPK cascade (GO:0000165)	62/279	0.000903644	0.0415676	-1.04194	7.30307	PLVAP;YWHAB;LRRK2;PSMD8;IKBKB;PSMD6;SYNGAP1;SPTAN1;HRAS;MAP3K5;JAK1;MAP4K2;MAP2K2;RIPK2;MINK1;IL18;NRG1;SPTB;GFRA4;DUSP7;PSMA3;PSMA1;RASA3;KARS;PSME4;TNIK;CAMK2B;CAMK2D;PSMD11;PSMD14;PSMD13;PDGFA;RASAL1;RASAL3;EGFR;PSMB4;GRIN2A;PSMB5;PSMB3;HSF1;MBP;NCAM1;FYN;MARK3;CAMK2G;MAP4K3;MAP4K4;BRAP;DAB2IP;BRAF;NFKB1;SETX;PPP5C;PSMC6;PSMC4;DLG4;TAOK2;TEK;FGF13;CALM1;FGFR3;FGFR2
positive regulation of early endosome to late endosome transport (GO:2000643)	4/9	0.0345045	0.32971	-2.16355	7.28393	RAB21;MTMR2;RDX;VPS11
nucleotide-excision repair, DNA duplex unwinding (GO:0000717)	8/23	0.0156227	0.239105	-1.74126	7.24195	CUL4A;DDB1;PARP1;CETN2;CHD1L;GTF2H2;GTF2H5;DDB2
regulation of cellular localization (GO:0060341)	13/41	0.00566911	0.137283	-1.39551	7.2186	CAMK2D;BRSK2;GSN;KDM1A;PARP1;NUMA1;WWC1;GOSR1;LRP5;CSNK1E;CPLX3;ADCY5;DVL1
response to DNA damage checkpoint signaling (GO:0072423)	3/7	0.0747211	0.480304	-2.77033	7.18621	MUS81;FBXO18;APAF1
peptidyl-lysine modification (GO:0018205)	29/116	0.0034956	0.0983222	-1.26936	7.1798	HDAC4;POP5;TOP2B;POM121;NUP107;PLOD3;LIAS;SENP6;TRIM28;NUP85;SUMO3;SUMO2;NUP88;RAE1;NDC1;BCL11A;SIRT5;NUP153;P3H4;RANGAP1;SENP2;SIRT1;SIRT2;KAT2B;NDUFAB1;NUP35;NUP54;VIPAS39;NUP98
posttranscriptional regulation of gene expression (GO:0010608)	13/45	0.0131416	0.2135	-1.65712	7.17858	CYFIP2;EIF2B4;CYFIP1;RPL10;DDX25;TDRD7;ATG14;PUM3;RBM3;PER1;ATXN2;ZC3H7A;METAP1
regulation of glycolytic process (GO:0006110)	16/58	0.0101366	0.181965	-1.55879	7.15734	HDAC4;NDC1;POM121;PFKFB4;NUP107;ECD;ARNT;NUP153;EIF6;NUP85;NUP35;NUP54;NUP88;NUP98;RAE1;FBP1
gland morphogenesis (GO:0022612)	3/7	0.0747211	0.480304	-2.75386	7.1435	SLC9A3R1;TGFB2;FGFR2
regulation of ion homeostasis (GO:2000021)	8/24	0.0204058	0.271421	-1.83527	7.14274	SLC30A7;CAMK2D;SLC30A3;WNK2;SLC30A5;FHL1;AP3D1;NEDD4L
pigment granule transport (GO:0051904)	6/18	0.0427918	0.37444	-2.26549	7.13949	BBS2;MKKS;MYO5A;BBS7;BBS4;RAB11A
negative regulation of cellular component organization (GO:0051129)	16/55	0.00586672	0.137805	-1.38739	7.12904	HSPA8;LRSAM1;MTMR2;TRAF3IP1;RDX;DNM2;DNAJB2;LGALS3;TMEFF2;DNAJA4;SPRY2;PACSIN3;ULK1;LCMT1;NOP53;RAPGEF3
regulation of cellular amino acid metabolic process (GO:0006521)	14/52	0.0192691	0.263	-1.79977	7.10776	PSMD11;PSMD14;PSMD13;ODC1;PSMD8;PSMB4;PSMA3;PSMD6;PSMC6;PSMB5;PSMA1;PSMC4;PSMB3;PSME4
glucan catabolic process (GO:0009251)	7/19	0.0167442	0.240073	-1.73699	7.10375	PYGB;GAA;PHKG2;PHKB;CALM1;PHKA2;PGM1
rRNA methylation (GO:0031167)	8/24	0.0204058	0.271421	-1.8251	7.10319	EMG1;NSUN4;NSUN5;DIMT1;NSUN3;NOP2;TFB2M;BUD23
protein modification by small protein conjugation (GO:0032446)	83/399	0.00120295	0.0500591	-1.05522	7.09423	TOP2B;NUP107;UBE3A;UBE3B;ARRB2;HERC4;HERC3;TRIM28;SUMO3;SUMO2;ARIH2;ELOC;HERC6;ARRDC4;NDC1;RNF43;MYLIP;ATG3;FBXW5;FBXO18;USP5;NOSIP;FBXO10;RANGAP1;SENP2;SIRT1;PJA2;KLHL42;DDB1;HECW2;NUP54;BIRC6;NUP98;BIRC2;VCP;POM121;DCUN1D5;KLHL15;UBA5;DCUN1D1;DCUN1D2;NEDD4L;FBXO45;BCL10;RNF4;CBL;DCAF15;HECTD1;RNF213;NUP85;NUP88;RAE1;UBE2F;RNF20;BRAP;RNF25;SMURF1;BCL11A;KLHL2;KLHL22;ISG15;KLHDC8B;NUP153;PEX12;FB…
regulation of mitotic cell cycle phase transition (GO:1901990)	40/185	0.0106722	0.187763	-1.5601	7.08301	PID1;PSMD11;PSMD14;DCTN1;PSMD13;CETN2;CDC14A;AURKA;CDC14B;PSMD8;PSMB4;PSMD6;PSMB5;PSMB3;CNTRL;CEP76;CLASP1;YWHAG;CEP78;PLK5;KCNH5;ODF2;NEK6;CSNK1E;DYNLL1;TUBA4A;SIRT2;DDB1;PSMA3;PSMC6;PSMA1;PSMC4;HECW2;CDC16;PSME4;ANAPC4;CEP63;SFI1;ANAPC1;SDCCAG8
regulation of dendrite development (GO:0050773)	12/38	0.00800932	0.162992	-1.46699	7.08138	CAMK2B;FXR2;SEMA4D;HECW2;DAB2IP;NEDD4L;KNDC1;NSMF;VLDLR;TNIK;CSMD3;BMP7
exit from mitosis (GO:0010458)	5/13	0.0348304	0.32971	-2.10666	7.07262	UBE2S;PPP2R2D;CHMP2A;CLASP1;CLASP2
postsynaptic density organization (GO:0097106)	4/10	0.0507852	0.401635	-2.3705	7.06445	NLGN2;NRXN1;SHANK2;SHANK1
protein neddylation (GO:0045116)	5/14	0.0476247	0.401356	-2.31627	7.05166	UBE2F;DCUN1D5;DCUN1D1;DCUN1D2;UBE2M
negative regulation of T cell differentiation in thymus (GO:0033085)	3/7	0.0747211	0.480304	-2.71471	7.04193	BMP4;FOXJ1;TMEM131L
positive regulation of cytoplasmic transport (GO:1903651)	5/11	0.0162162	0.239105	-1.70566	7.03028	RAB21;MTMR2;RDX;VPS11;SORL1
postsynaptic density assembly (GO:0097107)	4/8	0.0217253	0.273617	-1.83328	7.02013	NLGN2;NRXN1;SHANK2;SHANK1
negative regulation of cell motility (GO:2000146)	26/98	0.0023052	0.0726794	-1.15216	6.99662	ZMYND8;CHRD;SPINT2;PTPRK;ADARB1;LDLRAD4;ARHGAP4;ROBO1;DAG1;DRD2;SRGAP1;RNF20;TCAF1;MAGI2;TPM1;ARAP3;FUZ;GTPBP4;TMEFF2;SFRP2;DLG5;PIN1;NF2;RECK;CRK;VCL
polyol biosynthetic process (GO:0046173)	4/9	0.0345045	0.32971	-2.07787	6.99549	IPPK;ISYNA1;PPIP5K2;ACER3
peptidyl-lysine dimethylation (GO:0018027)	5/11	0.0162162	0.239105	-1.69652	6.99264	SUV39H2;SETD3;SETD7;EHMT1;ASH1L
posttranscriptional gene silencing by RNA (GO:0035194)	7/19	0.0167442	0.240073	-1.70545	6.97478	TNRC6C;MOV10;CNOT6;EIF6;AGO3;CNOT1;NRDE2
epithelial cilium movement involved in determination of left/right asymmetry (GO:0060287)	4/10	0.0507852	0.401635	-2.32275	6.92214	CCDC39;NPHP3;RFX3;CCDC40
autophagosome organization (GO:1905037)	15/57	0.0193558	0.263	-1.75417	6.91978	ATG3;UBXN2B;UBXN2A;WDR45B;RAB1B;TRAPPC8;ATG14;NSFL1C;ATG16L2;ATG16L1;RAB35;ATG4C;ATG4B;ULK1;ATG4A
positive regulation of Wnt signaling pathway (GO:0030177)	34/141	0.00314025	0.0888932	-1.19853	6.9077	MACF1;VCP;PSMD11;PSMD14;PSMD13;LRRK2;LRRK1;DIXDC1;GSKIP;PSMD8;PSMB4;PSMD6;PSMB5;PSMB3;DVL1;DACT1;CSNK2A1;AXIN2;CSNK1E;NFKB1;SMARCA4;COL1A1;PPM1A;GPRC5B;PSMA3;DEPDC1B;PSMC6;SFRP2;PSMA1;PSMC4;WNK2;PSME4;PIN1;FGFR2
positive regulation of dephosphorylation (GO:0035306)	9/25	0.00821731	0.163458	-1.42708	6.85216	SMPD1;CNEP1R1;GBA;SYMPK;PIN1;MTMR9;NSMF;CALM1;SPPL3
melanosome transport (GO:0032402)	6/18	0.0427918	0.37444	-2.16921	6.83606	BBS2;MKKS;MYO5A;BBS7;BBS4;RAB11A
regulation of protein catabolic process (GO:0042176)	23/92	0.00865392	0.168351	-1.43635	6.82228	NSF;VCP;EGLN2;SF3B3;CSNK2A1;LRP1;SMURF1;ODC1;WNT5A;DAB2IP;SNX12;AGAP2;NEDD4L;SORL1;SIRT2;EGFR;EEF1A1;DDB1;HECW2;ADGRB1;PIN1;FLNA;DACT1
nucleic acid metabolic process (GO:0090304)	21/81	0.00767159	0.158479	-1.40063	6.82138	EXD2;RBFOX2;LSM1;HNRNPR;CASC3;GTF2F2;DUSP11;HNRNPL;PTBP1;ATXN2;RECQL5;HNRNPH1;POLR2C;XRN2;ERI3;PCBP2;DXO;TOPBP1;HNRNPC;POLR2H;RBMX
positive regulation of signal transduction (GO:0009967)	47/207	0.00225048	0.0721003	-1.11625	6.80535	MACF1;FLT1;NLGN2;NRXN1;TUBD1;PIK3R1;RBPJ;ROBO1;DLL4;DSTYK;RELN;STK36;DVL1;TSPAN5;FLNA;PTK2B;DACT1;JAG2;CREBBP;TGFB2;MBD5;XBP1;CSNK2A1;HOMER1;PRKCB;PIH1D1;DAB2IP;ARNT;SIRT1;SMARCA4;ERN1;STX1B;PPM1A;KAT2B;DEPDC1B;SNW1;DLG4;RAB34;DLG5;LANCL2;PHIP;TEK;ITGA5;GAS6;FGFR2;SHANK2;SHANK1
postsynaptic neurotransmitter receptor diffusion trapping (GO:0098970)	4/9	0.0345045	0.32971	-2.01708	6.79085	CACNG7;CACNG8;DLG4;GPHN
miRNA metabolic process (GO:0010586)	6/17	0.0325694	0.32971	-1.98115	6.78422	DDX17;KHSRP;XPO5;DICER1;TARBP2;DIS3L2
positive regulation of RNA export from nucleus (GO:0046833)	3/7	0.0747211	0.480304	-2.61504	6.7834	RBM27;RBM26;DHX9
integrin activation (GO:0033622)	4/9	0.0345045	0.32971	-2.01394	6.78027	COL16A1;CXCL12;FN1;FERMT2
mRNA splice site selection (GO:0006376)	8/25	0.0261415	0.294097	-1.85207	6.74936	SETX;PRPF39;SFSWAP;CELF2;SRSF1;SRSF5;SRSF6;SRSF10
regulation of RNA splicing (GO:0043484)	16/56	0.00708728	0.155954	-1.36311	6.74666	PIK3R1;RRP1B;CLK4;CLK3;CLK2;CLK1;SETX;ERN1;PTBP1;U2AF2;SNRNP70;HNRNPH1;TRA2B;SRSF10;RPS13;RBM22
microtubule anchoring (GO:0034453)	5/13	0.0348304	0.32971	-2.00662	6.73677	BCCIP;DAG1;CLASP1;BICD2;CLASP2
histone methylation (GO:0016571)	7/20	0.0224792	0.27688	-1.77108	6.72155	PRMT6;NSD3;PRMT2;CARM1;EHMT1;PRMT9;EZH2
negative regulation of phosphatidylinositol 3-kinase signaling (GO:0014067)	4/10	0.0507852	0.401635	-2.25185	6.71084	SLC9A3R1;DAB2IP;STAMBP;NOP53
regulation of dendritic spine development (GO:0060998)	10/32	0.0161174	0.239105	-1.62344	6.70132	CAMK2B;SIPA1L1;PTPRS;FXR2;DLG5;LRRK2;CAMK1;PSEN1;SHANK2;SHANK1
positive regulation of potassium ion transmembrane transport (GO:1901381)	6/16	0.024074	0.285513	-1.79455	6.68763	KCNH2;FLNA;ANK2;ATP1B3;ANO6;ATP1B1
amino sugar catabolic process (GO:0046348)	3/7	0.0747211	0.480304	-2.57752	6.68607	NAGK;GNPDA2;AMDHD2
succinyl-CoA metabolic process (GO:0006104)	3/7	0.0747211	0.480304	-2.57684	6.68431	SUCLA2;OGDH;SUCLG1
microtubule anchoring at centrosome (GO:0034454)	4/10	0.0507852	0.401635	-2.23431	6.65858	NIN;DCTN1;HOOK3;BBS4
regulation of glutamate receptor signaling pathway (GO:1900449)	11/33	0.00700988	0.155556	-1.33987	6.64633	CACNG7;CACNG8;RELN;NLGN2;DLG4;MINK1;PTK2B;SHISA9;SHANK2;SHISA7;SHANK1
cerebral cortex cell migration (GO:0021795)	3/7	0.0747211	0.480304	-2.5571	6.63311	RELN;FGF13;PEX13
Notch receptor processing, ligand-dependent (GO:0035333)	5/14	0.0476247	0.401356	-2.16778	6.5996	JAG2;DLL4;NOTCH3;ADAM10;PSEN1
Golgi to plasma membrane protein transport (GO:0043001)	8/25	0.0261415	0.294097	-1.80853	6.59071	BBS2;NSF;RAB10;MACF1;GOLGA4;RAB31;RAB34;VAMP2
receptor catabolic process (GO:0032801)	8/25	0.0261415	0.294097	-1.80797	6.58864	RNF43;MYLIP;SMURF1;SNX25;CLTC;PIK3R4;VLDLR;AP2A2
mitochondrial translation (GO:0032543)	27/108	0.00471942	0.123783	-1.22689	6.5713	MRPS17;GFM1;MRPS35;MRPS14;GFM2;MRPS33;MRPL16;MRPL39;MRPS10;MRPL15;MRPL13;MRPL32;MRPL3;MRPL42;MRPL9;NDUFA7;MRPS24;MTERF3;MRPL49;MRPS21;ERAL1;QRSL1;MRPS7;HARS2;MRPL21;LARS2;MRPS9
excitatory postsynaptic potential (GO:0060079)	7/20	0.0224792	0.27688	-1.72988	6.56516	NPAS4;GRIN2A;LRRK2;AKT1;ARRB2;DRD2;RAB3GAP1
regulation of RNA export from nucleus (GO:0046831)	6/16	0.024074	0.285513	-1.76083	6.56196	RBM27;RBM26;DHX9;ZC3H3;AKAP8L;NUP153
regulation of receptor internalization (GO:0002090)	9/29	0.0229803	0.278794	-1.73793	6.55742	AHI1;ATXN2;MTMR2;DLG4;TBC1D5;MAGI2;PICK1;ARRB2;SCYL2
positive regulation of canonical Wnt signaling pathway (GO:0090263)	26/114	0.0183365	0.256748	-1.63891	6.55378	VCP;PSMD11;PSMD14;PSMD13;LRRK2;LRRK1;DIXDC1;GSKIP;PSMD8;PSMB4;PSMD6;PSMB5;PSMB3;AXIN2;NFKB1;COL1A1;GPRC5B;PSMA3;PSMC6;SFRP2;PSMA1;PSMC4;WNK2;PSME4;PIN1;FGFR2
cellular response to forskolin (GO:1904322)	4/9	0.0345045	0.32971	-1.94639	6.55284	ADCY2;ADCY1;ADCY6;ADCY5
mRNA 5'-splice site recognition (GO:0000395)	3/7	0.0747211	0.480304	-2.52567	6.55158	PRPF39;SFSWAP;SRSF1
iron ion import (GO:0097286)	3/7	0.0747211	0.480304	-2.50879	6.50779	SLC11A2;MELTF;PICALM
cGMP metabolic process (GO:0046068)	9/29	0.0229803	0.278794	-1.71191	6.45925	GUCY1A2;ADCY9;ADCY2;ADCY1;ADCY8;ADCY7;ADCY6;PDE9A;ADCY5
polyol metabolic process (GO:0019751)	14/48	0.00939939	0.176629	-1.37902	6.43605	IPPK;ISYNA1;ITPK1;PLD4;OCRL;INPP4A;INPP5B;PLCB4;PPIP5K2;INPP5J;PLCH2;CALM1;PLCD1;IP6K2
peptidyl-arginine methylation (GO:0018216)	4/10	0.0507852	0.401635	-2.15931	6.43506	PRMT6;PRMT2;CARM1;PRMT9
negative regulation of translation (GO:0017148)	23/89	0.00566602	0.137283	-1.2416	6.42311	EIF2AK3;EIF2AK2;EIF2AK4;MALSU1;TYMS;MEX3C;GIGYF2;TNRC6C;MOV10;CPEB1;ILF3;CNOT6;LARP1;FXR2;UNK;EIF6;CNOT1;CAPRIN1;CNOT2;CNOT3;IGF2BP3;EIF4E2;PAIP2
protein destabilization (GO:0031648)	10/32	0.0161174	0.239105	-1.54972	6.39702	CREBBP;GSN;TMEM147;NCLN;CCDC88C;HTT;FBXL3;RAD23A;SENP2;SIRT1
histone arginine methylation (GO:0034969)	5/13	0.0348304	0.32971	-1.90343	6.39034	PRMT6;PRMT2;PRDM4;CARM1;PRMT9
COPI-coated vesicle budding (GO:0035964)	3/7	0.0747211	0.480304	-2.46061	6.3828	TMED9;GBF1;ARFGAP2
mitochondrion morphogenesis (GO:0070584)	4/10	0.0507852	0.401635	-2.14029	6.37838	SUPV3L1;PID1;PNPT1;MFF
protein ubiquitination (GO:0016567)	101/507	0.00172743	0.0600655	-1.00164	6.37156	FBXO27;UBE3A;UBE3B;PSMD8;HERC4;HERC3;PSMD6;MAEA;HERC6;ARRDC4;RNF43;MYLIP;ATG3;FBXW5;FBXO18;USP5;FBXW9;NOSIP;FBXO10;FBXW2;KLHL42;HECW2;PSME4;VCP;PSMD11;PSMD14;PSMD13;KLHL15;UBR4;NEDD4L;FBXO45;BCL10;FBXO41;RNF213;BTBD3;LONRF2;BRAP;SMURF1;KLHL22;ISG15;KLHDC8B;BTBD11;FBXO32;KLHL20;UBE2W;RNF103;UBE2S;MKRN1;PAF1;FBXL3;UBA1;BLMH;FBXL5;FBXL4;DZIP3;NFE2L2;LRSAM1;RNF13;ARRB2;PRPF19;TRIM68;ARIH2;ELOC;SIRT1;…
activation of protein kinase activity (GO:0032147)	51/234	0.00371351	0.103138	-1.13627	6.35831	LRRK2;CRKL;GRM4;AKT1;PRKACB;MAP3K4;MAP3K5;MAP2K4;MAP4K2;MAP2K2;RIPK2;MINK1;WNT5A;IL18;NRG1;TGFBR2;DUSP7;ADCY9;PRKAR1B;KARS;PRKAR1A;MADD;ERP29;TNIK;GAS6;CRK;ADCY2;ADCY1;ADCY8;ADCY7;TANK;ADCY6;ADCY5;RAP1A;PTK2B;MAP4K3;MAP4K4;PAK4;MAP2K6;OSBPL8;TGFB2;KIDINS220;DAB2IP;EIF2AK2;MTOR;BMP4;MAP3K15;TAOK2;TAB2;TAB1;MAP3K13
nucleobase-containing compound catabolic process (GO:0034655)	13/44	0.0108016	0.189286	-1.40372	6.35614	ENTPD1;PNPT1;PABPC4;ENTPD6;SND1;NUDT9;SUPV3L1;TATDN2;RNASEH1;XRN2;PPP1R8;ADPRM;DIS3L2
regulation of hydrolase activity (GO:0051336)	21/81	0.00767159	0.158479	-1.30065	6.33446	CAMK2D;BRSK2;RDX;DAB2IP;OCRL;RAP1GAP;RASIP1;FGD1;VAV1;FGD4;FGD5;SIPA1L1;SNRNP70;VMA21;PLXNA2;BVES;CRK;RAPGEF6;RAB3GAP1;MYH6;PLXNA3
positive regulation of organelle assembly (GO:1902117)	14/48	0.00939939	0.176629	-1.35629	6.32994	LRSAM1;CNOT6L;PDCD6IP;NUMA1;HTT;FUZ;ASAP1;CNOT6;CNOT1;CROCC;CNOT2;RAB3GAP1;TAPT1;BBS4
regulation of SNARE complex assembly (GO:0035542)	4/10	0.0507852	0.401635	-2.11766	6.31095	VPS18;ANKRD27;VPS41;VPS11
beta-catenin-TCF complex assembly (GO:1904837)	10/31	0.0127669	0.211156	-1.4471	6.31065	TLE4;PYGO2;BCL9;CREBBP;RBBP5;HDAC1;TRRAP;ASH2L;AXIN2;SMARCA4
negative regulation of dephosphorylation (GO:0035305)	18/64	0.00532582	0.135387	-1.20518	6.30936	PPP1R37;PPP1R26;CSRNP2;PPP1R12A;RBM26;FKBP15;YWHAB;LMTK3;RRP1B;KNL1;ZFYVE1;SYTL2;WDR81;PPP1R8;CD2BP2;INPP5K;PPP1R12C;SFI1
regulation of nuclear cell cycle DNA replication (GO:0033262)	3/7	0.0747211	0.480304	-2.43137	6.30694	TIPIN;ATRX;CDC7
protein-cofactor linkage (GO:0018065)	4/11	0.070539	0.480304	-2.37651	6.30153	POP5;GAD1;NDUFAB1;LIAS
regulation of cellular ketone metabolic process (GO:0010565)	17/62	0.00873347	0.169154	-1.32904	6.30044	PANK2;PSMD11;PSMD14;PSMD13;ODC1;SIRT5;SIRT1;PSMD8;PSMB4;PSMA3;PSMD6;PSMC6;PSMB5;PSMA1;PSMC4;PSMB3;PSME4
Golgi vesicle transport (GO:0048193)	56/272	0.00850538	0.166932	-1.32025	6.29372	PGAP1;BICD2;GOLGA2;TRAPPC12;TRAPPC11;KIFAP3;TMED7;SPTAN1;NSF;TMED9;COG2;COG1;ANK2;KIF22;DYNLL1;OTOR;ANK1;SPTB;ARFGAP1;SCAMP3;BET1L;ARFGAP2;TAPBP;DYNC1LI1;KIF2A;RAB35;PICK1;KDELR2;PREB;GAS6;VAMP2;ERGIC1;NAPA;DCTN6;COPB2;DCTN1;COPB1;GOSR2;RAB1B;GOSR1;HTT;KLC1;SNX2;CUX1;BNIP1;WHAMM;SNX8;SEC31A;SEC24B;GBF1;MYO5A;TRAPPC8;SORL1;ARCN1;COL7A1;BET1
peptidyl-arginine omega-N-methylation (GO:0035247)	4/10	0.0507852	0.401635	-2.11136	6.29218	PRMT6;PRMT2;CARM1;PRMT9
translocation of molecules into host (GO:0044417)	4/9	0.0345045	0.32971	-1.86631	6.28323	DDX39B;THOC1;THOC3;THOC5
tRNA transport (GO:0051031)	11/36	0.0141602	0.224128	-1.47346	6.27298	NDC1;POM121;NUP107;NUP85;TOMM20L;NUP35;NUP54;NUP88;NUP153;NUP98;RAE1
regulation of stress-activated MAPK cascade (GO:0032872)	12/42	0.0183928	0.256748	-1.56771	6.26424	PER1;TGFB2;PHLPP1;COPS5;MAP2K2;TAOK2;ULK4;DAB2IP;EIF2AK2;EGFR;MAP4K4;MAPK8IP1
actin filament reorganization (GO:0090527)	4/10	0.0507852	0.401635	-2.09803	6.25243	GSN;EFS;WHAMM;FRYL
nuclear migration (GO:0007097)	4/10	0.0507852	0.401635	-2.09797	6.25225	SLC9A3R1;TMEM201;DOCK7;HOOK3
cGMP biosynthetic process (GO:0006182)	8/25	0.0261415	0.294097	-1.71228	6.23996	GUCY1A2;ADCY9;ADCY2;ADCY1;ADCY8;ADCY7;ADCY6;ADCY5
mitotic chromosome condensation (GO:0007076)	6/16	0.024074	0.285513	-1.67116	6.2278	NIPBL;PAPD7;AKAP8L;NCAPG;NCAPD2;NCAPD3
regulation of carbohydrate catabolic process (GO:0043470)	12/38	0.00800932	0.162992	-1.28722	6.21359	NDC1;POM121;NUP107;EIF6;NUP85;ECD;NUP35;NUP54;NUP88;NUP153;NUP98;RAE1
maintenance of apical/basal cell polarity (GO:0035090)	4/11	0.070539	0.480304	-2.3415	6.20869	PDCD6IP;PDZD11;LIN7B;ANK1
regulation of gene expression, epigenetic (GO:0040029)	20/75	0.00656683	0.150255	-1.23391	6.20128	HDAC4;HDAC5;DNMT1;TBP;KDM1B;DDX21;CTCF;BAZ1B;ACTB;KAT2B;RBBP4;POLR1A;POLR1B;MTF2;EPC1;RBBP7;TRIM27;POLR2H;JARID2;EZH2
regulation of glucose transport (GO:0010827)	6/17	0.0325694	0.32971	-1.80817	6.19186	CLIP3;C2CD5;PRKCB;INPP5K;BRAF;APPL1
negative regulation of embryonic development (GO:0045992)	4/11	0.070539	0.480304	-2.33153	6.18227	LFNG;FZD3;SFRP2;FUZ
lamellipodium assembly (GO:0030032)	8/24	0.0204058	0.271421	-1.58656	6.17479	CYFIP1;ABLIM3;SPATA13;ARFIP2;CDH13;WHAMM;ARHGEF7;VCL
positive regulation of myeloid leukocyte cytokine production involved in immune response (GO:0061081)	3/7	0.0747211	0.480304	-2.37799	6.1685	GPRC5B;WNT5A;BCL10
insulin-like growth factor receptor signaling pathway (GO:0048009)	4/11	0.070539	0.480304	-2.31562	6.14009	EIF2AK3;AKT1;PIK3R1;GIGYF2
iron-sulfur cluster assembly (GO:0016226)	6/19	0.0548138	0.423919	-2.11284	6.13528	HSPA9;GLRX3;IBA57;CIAPIN1;NARFL;FXN
ruffle organization (GO:0031529)	6/17	0.0325694	0.32971	-1.78359	6.10771	CYFIP1;TPM1;PLEK;PIP5K1A;ARFIP2;INPP5K
negative regulation of protein kinase B signaling (GO:0051898)	11/36	0.0141602	0.224128	-1.43165	6.09499	SLC9A3R1;PHLPP1;MAGI2;DAG1;AKT1;INPP5K;ARRB2;PPP2R5C;DRD2;SIRT1;NOP53
regulation of epithelial to mesenchymal transition involved in endocardial cushion formation (GO:1905005)	3/7	0.0747211	0.480304	-2.34621	6.08605	ACVR1;TGFB2;TGFBR2
positive regulation of gene expression (GO:0010628)	140/772	0.0101326	0.181965	-1.32421	6.08076	RPL5;PID1;RORA;ACTB;TRIM28;ZXDC;AKT1;EPC1;UBAP2L;MAP3K5;ACVR1;DDX17;SMARCC1;SMARCC2;MAP2K2;DIMT1;WNT5A;CIRBP;WDR75;RFX3;ANK2;ILF2;HCFC1;RUNX1;ERN1;ILF3;KARS;KAT6B;KAT6A;ERP29;PHIP;RPL26;ENY2;BLM;DNMT1;DDX5;BCL10;PSEN1;PIK3R1;NPAT;FXR2;DDRGK1;NUP85;DVL1;WBP2NL;ZKSCAN3;INPP5K;CREBBP;EGR2;SS18L1;RDX;FN1;EIF2AK3;BRAF;NR2F2;BMP7;NFKB1;SMARCA4;SETX;COL1A1;BMP4;CDK7;FUBP3;EIF6;LHX2;SP1;TADA3;TCF3;NFE2L1…
regulation of cellular senescence (GO:2000772)	8/25	0.0261415	0.294097	-1.66848	6.08033	RSL1D1;RBL1;PNPT1;NEK6;ZKSCAN3;TERF2;SIRT1;YPEL3
homocysteine metabolic process (GO:0050667)	4/10	0.0507852	0.401635	-2.03778	6.07288	MTRR;CBS;MTHFR;BLMH
phosphatidylinositol metabolic process (GO:0046488)	27/113	0.0089266	0.170813	-1.27633	6.02264	SLC27A1;MTMR2;PGAP1;MTMR3;MTMR12;MTMR14;PLEK;PIK3R4;MTMR9;PIK3R2;PIK3R1;MTMR6;INPP5B;EFR3A;INPP5F;INPP5J;PIP5K1A;INPP5K;PIP5K1C;IP6K2;PLA2G12A;TMEM150A;PLA2G4E;MBOAT7;OCRL;SYNJ2;INPP4A
regulation of androgen receptor signaling pathway (GO:0060765)	8/24	0.0204058	0.271421	-1.54423	6.01004	DDX5;PRMT2;HDAC1;TRIM68;SAFB2;ARRB2;SIRT1;SMARCA4
regulation of mRNA processing (GO:0050684)	9/29	0.0229803	0.278794	-1.59111	6.00345	RBM27;AHCYL1;RBM26;SLTM;DHX9;SAFB2;SAFB;CDK11B;SRSF10
nuclear import (GO:0051170)	19/72	0.00893521	0.170813	-1.26715	5.97811	RPAIN;RANBP1;POM121;IPO11;NUP107;RANBP3;RANBP17;NUP153;PTTG1IP;MCM3AP;IPO9;NUP85;HEATR3;NUP88;NUP98;GEMIN8;RAE1;TNPO3;SNRPB
intracellular estrogen receptor signaling pathway (GO:0030520)	7/20	0.0224792	0.27688	-1.57453	5.97562	DDX17;DDX5;EGLN2;RBFOX2;NCOA6;TADA3;SAFB
Wnt signaling pathway, planar cell polarity pathway (GO:0060071)	21/89	0.0222647	0.27688	-1.56487	5.95395	FZD3;PSMD11;PSMD14;SMURF1;PSMD13;MAGI2;CLTC;WNT5A;ARRB2;AP2A2;PSMD8;PSMB4;PSMA3;PSMD6;PSMC6;PSMB5;PSMA1;PSMC4;PSMB3;DVL1;PSME4
positive regulation of mitochondrial membrane potential (GO:0010918)	3/7	0.0747211	0.480304	-2.29434	5.9515	VCP;AKT2;AKT1
positive regulation of synapse maturation (GO:0090129)	4/10	0.0507852	0.401635	-1.99449	5.94389	CAMK2B;RELN;NRXN1;DAB2IP
peptidyl-serine modification (GO:0018209)	38/171	0.00805188	0.163106	-1.23187	5.93989	CAMK2B;CAMK2D;MAST3;LRRK2;GALNT18;MAST1;CAMKK1;IKBKB;MAPK9;STK11;TBK1;MKNK1;AKT2;PHKG2;STK38;TLK2;AKT1;CAMK2G;STK32C;PARP1;PRKCB;PARP2;CSNK1A1;NEK6;EIF2AK3;CDC7;CSNK1E;VRK3;MTOR;TGFBR2;MAP3K10;ULK1;SGK3;CAMK1;PKN1;GAS6;CAMK1G;ATR
membrane fusion (GO:0061025)	15/55	0.0139787	0.223659	-1.38771	5.92584	NAPA;NSF;MIGA2;GCA;UBXN2B;UBXN2A;MFF;DNM2;NSFL1C;CHCHD3;OPA1;VPS41;MFN2;SNAP29;VAMP2
[truncated: 4,029 more rows]

## Sheet: DEXSeq Combined (Adar1 & 2 KO)
Term	Overlap	P-value	Adjusted P-value	Z-score	Combined Score	Genes
[truncated: 4,559 more rows]

[truncated: 1 more sheets: DEXSeq Brain (Adar1--E861A)]
