# Supplementary material for: ADAR-deficiency perturbs the global splicing landscape in mouse tissues
Source: Genome Res. 2020 Aug;30(8):1107–18. doi: 10.1101/gr.256933.119 (PMC7462079; doi:10.1101/gr.256933.119)
Supplement: Supplemental Material [file supp_gr.256933.119_Supplemental_Table_S3.xlsx]

## Sheet: Legend
Supplemental Table S3: Gene Ontology analysis of alternatively spliced genes for MAJIQ
For genes differentially spliced in the MAJIQ datasets a Gene Ontology (GO) analysis was done. Significant hits on ontology terms linked with splicing and RNA processing are highlighted in green.
The analysis was done either for Adar (Adar1) alone or Adar and Adarb1 (Adar2) for different tissues (Bone Marrow, Liver, Cortex, Brain).

## Sheet: MAJIQ Bone Marrow (Adar1 KO)
Term	Overlap	P-value	Adjusted P-value	Z-score	Combined Score	Genes
cellular response to hydroxyurea (GO:0072711)	2/8	0.000600805	0.119058	-3.20701	23.7872	TIMELESS;SPIDR
response to hydroxyurea (GO:0072710)	2/9	0.000770099	0.119058	-3.07456	22.0415	TIMELESS;SPIDR
negative regulation of NIK/NF-kappaB signaling (GO:1901223)	2/10	0.000959679	0.119058	-2.9534	20.5229	ADGRG3;CPNE1
myeloid cell activation involved in immune response (GO:0002275)	2/12	0.00139893	0.119058	-2.81173	18.4788	SBNO2;DOCK2
regulation of mRNA splicing, via spliceosome (GO:0048024)	4/61	0.000194529	0.119058	-1.85527	15.8532	RBM25;SON;YTHDC1;RBM7
cellular response to nitrogen compound (GO:1901699)	2/15	0.00220524	0.119058	-2.3407	14.3179	TIMELESS;SPIDR
diacylglycerol metabolic process (GO:0046339)	2/14	0.00191706	0.119058	-2.22113	13.8975	DGKD;DGKA
cellular response to inorganic substance (GO:0071241)	2/18	0.00318402	0.130757	-2.36449	13.5949	TIMELESS;SPIDR
mRNA splice site selection (GO:0006376)	2/25	0.00611124	0.154388	-2.46327	12.5568	PRPF39;YTHDC1
DNA replication checkpoint (GO:0000076)	2/18	0.00318402	0.130757	-2.1673	12.4611	CDT1;TIMELESS
mRNA-containing ribonucleoprotein complex export from nucleus (GO:0071427)	4/101	0.00131914	0.119058	-1.7447	11.5687	NUP214;UPF3B;SMG6;WDR33
nucleobase metabolic process (GO:0009112)	1/7	0.0324445	0.268248	-3.28829	11.273	UCKL1
positive regulation of T cell differentiation in thymus (GO:0033089)	1/7	0.0324445	0.268248	-3.22885	11.0692	TESPA1
positive regulation of tumor necrosis factor-mediated signaling pathway (GO:1903265)	1/8	0.0369936	0.268248	-3.34192	11.0183	CPNE1
regulation of meiotic nuclear division (GO:0040020)	1/8	0.0369936	0.268248	-3.33892	11.0084	FBXO5
negative regulation of T cell differentiation in thymus (GO:0033085)	1/7	0.0324445	0.268248	-3.18459	10.9175	TMEM131L
cellular response to chemokine (GO:1990869)	1/7	0.0324445	0.268248	-3.16541	10.8517	DOCK8
negative regulation of meiotic cell cycle (GO:0051447)	1/7	0.0324445	0.268248	-3.16519	10.851	FBXO5
lipid modification (GO:0030258)	2/27	0.00710672	0.154388	-2.1712	10.7403	DGKD;DGKA
regulation of protein complex assembly (GO:0043254)	3/74	0.00512158	0.154388	-1.97655	10.4249	CDT1;ULK1;SPIDR
mRNA 5'-splice site recognition (GO:0000395)	1/7	0.0324445	0.268248	-2.98461	10.2319	PRPF39
double-strand break repair via homologous recombination (GO:0000724)	3/77	0.00572126	0.154388	-1.97713	10.2091	SFR1;SMC5;SPIDR
neuron projection extension (GO:1990138)	2/29	0.00817041	0.154388	-2.11978	10.1903	CPNE1;ULK1
response to muramyl dipeptide (GO:0032495)	1/10	0.0460284	0.268248	-3.30194	10.165	ARHGEF2
negative regulation of telomere capping (GO:1904354)	1/8	0.0369936	0.268248	-3.05127	10.0601	SMG6
RNA polyadenylation (GO:0043631)	2/29	0.00817041	0.154388	-2.04922	9.85108	MTPAP;WDR33
carbohydrate transport (GO:0008643)	1/7	0.0324445	0.268248	-2.81935	9.66538	SLC50A1
regulation of establishment of protein localization (GO:0070201)	1/8	0.0369936	0.268248	-2.90558	9.57973	SPIDR
negative regulation of necroptotic process (GO:0060546)	1/7	0.0324445	0.268248	-2.77496	9.51318	ARHGEF2
regulation of transcription involved in G1/S transition of mitotic cell cycle (GO:0000083)	2/27	0.00710672	0.154388	-1.89941	9.39586	CDT1;FBXO5
response to chemokine (GO:1990868)	1/7	0.0324445	0.268248	-2.73554	9.37803	DOCK8
positive regulation of double-strand break repair (GO:2000781)	2/16	0.00251258	0.119058	-1.54511	9.24973	TIMELESS;SPIDR
regulation of RNA splicing (GO:0043484)	3/56	0.00232738	0.119058	-1.502	9.10663	CLK1;SON;YTHDC1
hyperosmotic response (GO:0006972)	1/8	0.0369936	0.268248	-2.73161	9.00614	ARHGEF2
regulation of chromosome organization (GO:0033044)	2/25	0.00611124	0.154388	-1.7656	9.00039	CDT1;SMG6
replication fork protection (GO:0048478)	1/8	0.0369936	0.268248	-2.7197	8.96688	TIMELESS
positive regulation of chromatin binding (GO:0035563)	1/9	0.0415216	0.268248	-2.81812	8.96596	CDT1
membrane invagination (GO:0010324)	1/8	0.0369936	0.268248	-2.69387	8.88173	HGS
cellular response to calcium ion (GO:0071277)	2/43	0.0174161	0.243825	-2.18556	8.85231	CPNE1;BRAF
macropinocytosis (GO:0044351)	1/7	0.0324445	0.268248	-2.55757	8.76791	DOCK2
regulation of mRNA processing (GO:0050684)	2/29	0.00817041	0.154388	-1.81232	8.71224	SON;YTHDC1
telomere maintenance via recombination (GO:0000722)	1/11	0.0505144	0.268248	-2.90969	8.68688	SMC5
regulation of NIK/NF-kappaB signaling (GO:1901222)	2/29	0.00817041	0.154388	-1.80327	8.66876	ADGRG3;CPNE1
establishment of protein localization to organelle (GO:0072594)	2/63	0.035462	0.268248	-2.57846	8.61023	NUP214;TSC2
positive regulation of DNA repair (GO:0045739)	2/39	0.0144659	0.222656	-2.031	8.60323	TIMELESS;SPIDR
positive regulation of chromosome segregation (GO:0051984)	1/12	0.0549794	0.268248	-2.96457	8.59961	SMC5
mRNA polyadenylation (GO:0006378)	2/28	0.00763013	0.154388	-1.75842	8.57345	MTPAP;WDR33
protein desumoylation (GO:0016926)	1/9	0.0415216	0.268248	-2.66846	8.48982	SENP2
cellular hyperosmotic response (GO:0071474)	1/7	0.0324445	0.268248	-2.45969	8.43237	ARHGEF2
regulation of cellular response to insulin stimulus (GO:1900076)	1/8	0.0369936	0.268248	-2.53808	8.36806	TSC2
pyrimidine nucleobase metabolic process (GO:0006206)	1/9	0.0415216	0.268248	-2.62337	8.34636	UCKL1
recombinational repair (GO:0000725)	3/72	0.0047439	0.153802	-1.553	8.30993	SFR1;SMC5;SPIDR
regulation of cytoplasmic mRNA processing body assembly (GO:0010603)	1/9	0.0415216	0.268248	-2.58969	8.23921	CNOT6
positive regulation of autophagosome assembly (GO:2000786)	1/10	0.0460284	0.268248	-2.66975	8.2188	RAB3GAP2
purine nucleotide biosynthetic process (GO:0006164)	1/8	0.0369936	0.268248	-2.44365	8.05673	AMPD2
negative regulation of necrotic cell death (GO:0060547)	1/8	0.0369936	0.268248	-2.42764	8.00395	ARHGEF2
insulin-like growth factor receptor signaling pathway (GO:0048009)	1/11	0.0505144	0.268248	-2.67559	7.98798	TSC2
regulation of peroxisome proliferator activated receptor signaling pathway (GO:0035358)	1/9	0.0415216	0.268248	-2.49737	7.94548	ASXL1
regulation of double-strand break repair (GO:2000779)	2/35	0.0117575	0.201183	-1.78457	7.92931	TIMELESS;SPIDR
negative regulation of phosphatidylinositol 3-kinase signaling (GO:0014067)	1/10	0.0460284	0.268248	-2.55574	7.86784	TSC2
activation of JUN kinase activity (GO:0007257)	2/31	0.00930098	0.165083	-1.67406	7.83066	MAP4K2;MAPK8IP3
mRNA transport (GO:0051028)	4/105	0.00152256	0.119058	-1.20512	7.81803	NUP214;UPF3B;SMG6;WDR33
mRNA export from nucleus (GO:0006406)	4/106	0.00157664	0.119058	-1.20956	7.80463	NUP214;UPF3B;SMG6;WDR33
positive regulation of vacuole organization (GO:0044090)	1/11	0.0505144	0.268248	-2.61191	7.79785	RAB3GAP2
regulation of myosin-light-chain-phosphatase activity (GO:0035507)	1/8	0.0369936	0.268248	-2.35932	7.77869	PPP1R12A
regulation of T cell differentiation in thymus (GO:0033081)	1/13	0.0594237	0.268248	-2.71748	7.67162	TESPA1
lipid phosphorylation (GO:0046834)	2/36	0.0124114	0.206632	-1.7447	7.65774	DGKD;DGKA
negative regulation of vascular endothelial growth factor receptor signaling pathway (GO:0030948)	1/10	0.0460284	0.268248	-2.48315	7.64438	HGS
mRNA cleavage (GO:0006379)	1/9	0.0415216	0.268248	-2.39082	7.6065	WDR33
positive regulation of mitotic metaphase/anaphase transition (GO:0045842)	1/9	0.0415216	0.268248	-2.38456	7.58657	CDT1
glycerolipid biosynthetic process (GO:0045017)	1/9	0.0415216	0.268248	-2.34897	7.47336	CPNE1
attachment of mitotic spindle microtubules to kinetochore (GO:0051315)	1/12	0.0549794	0.268248	-2.57058	7.45672	CDT1
protein deneddylation (GO:0000338)	1/11	0.0505144	0.268248	-2.49565	7.45076	GPS1
pinocytosis (GO:0006907)	1/10	0.0460284	0.268248	-2.41858	7.44558	DOCK2
negative regulation of cellular senescence (GO:2000773)	1/12	0.0549794	0.268248	-2.56278	7.43409	RBL1
RNA export from nucleus (GO:0006405)	4/120	0.00248033	0.119058	-1.22923	7.37462	NUP214;UPF3B;SMG6;WDR33
regulation of cell cycle (GO:0051726)	5/216	0.00353664	0.136161	-1.30292	7.35441	MAP4K2;RBL1;SON;TSC2;FBXO5
positive regulation of DNA-dependent DNA replication (GO:2000105)	1/13	0.0594237	0.268248	-2.59076	7.31388	CDT1
histone mRNA catabolic process (GO:0071044)	1/12	0.0549794	0.268248	-2.51533	7.29646	MTPAP
mRNA 3'-end processing (GO:0031124)	3/75	0.00531703	0.154388	-1.38743	7.26574	UPF3B;MTPAP;WDR33
response to interleukin-6 (GO:0070741)	1/13	0.0594237	0.268248	-2.54312	7.1794	SBNO2
positive regulation of JUN kinase activity (GO:0043507)	2/51	0.0240032	0.268248	-1.92149	7.16634	MAP4K2;MAPK8IP3
regulation of small GTPase mediated signal transduction (GO:0051056)	4/141	0.00442127	0.151306	-1.3048	7.07373	FAM13B;ARHGEF1;ARHGEF2;GMIP
regulation of lipid kinase activity (GO:0043550)	1/12	0.0549794	0.268248	-2.43732	7.07018	RBL1
regulation of chromatin binding (GO:0035561)	1/12	0.0549794	0.268248	-2.42884	7.04557	CDT1
acylglycerol metabolic process (GO:0006639)	2/37	0.0130808	0.207301	-1.62242	7.03579	DGKD;DGKA
positive regulation of T cell receptor signaling pathway (GO:0050862)	1/11	0.0505144	0.268248	-2.35276	7.02416	TESPA1
kinetochore organization (GO:0051383)	1/13	0.0594237	0.268248	-2.48466	7.01435	CDT1
positive regulation of neuron migration (GO:2001224)	1/13	0.0594237	0.268248	-2.48057	7.00281	ARHGEF2
regulation of mitotic cell cycle spindle assembly checkpoint (GO:0090266)	1/15	0.0682502	0.274489	-2.60474	6.99263	CDT1
T cell proliferation (GO:0042098)	1/12	0.0549794	0.268248	-2.39505	6.94755	DOCK8
JNK cascade (GO:0007254)	3/67	0.00387531	0.140423	-1.23329	6.84863	MAP4K2;GPS1;MAPK8IP3
negative regulation of nuclear division (GO:0051784)	1/12	0.0549794	0.268248	-2.33032	6.75977	FBXO5
double-strand break repair (GO:0006302)	3/142	0.0293969	0.268248	-1.88562	6.65033	SFR1;SMC5;SPIDR
regulation of alternative mRNA splicing, via spliceosome (GO:0000381)	2/40	0.0151811	0.222656	-1.57707	6.60431	RBM25;RBM7
regulation of chromatin silencing (GO:0031935)	1/12	0.0549794	0.268248	-2.26561	6.57207	ATAD2B
positive regulation of cellular component biogenesis (GO:0044089)	3/88	0.00827081	0.154388	-1.36391	6.53998	CDT1;HGS;SPIDR
regulation of catabolic process (GO:0009894)	1/13	0.0594237	0.268248	-2.29128	6.46843	HGS
positive regulation of macroautophagy (GO:0016239)	2/45	0.0189788	0.259799	-1.61803	6.41456	RAB3GAP2;TSC2
negative regulation of meiotic nuclear division (GO:0045835)	1/7	0.0324445	0.268248	-1.86604	6.3972	FBXO5
glycerolipid metabolic process (GO:0046486)	1/11	0.0505144	0.268248	-2.13654	6.37862	DGKA
cellular response to peptide (GO:1901653)	2/42	0.0166564	0.238612	-1.53863	6.30063	TIMELESS;ARHGEF2
pyrimidine nucleoside salvage (GO:0043097)	1/13	0.0594237	0.268248	-2.1932	6.19153	UCKL1
pyrimidine-containing compound metabolic process (GO:0072527)	1/16	0.0726328	0.274489	-2.34263	6.14317	UCKL1
monosaccharide transport (GO:0015749)	1/15	0.0682502	0.274489	-2.26678	6.08535	SLC50A1
positive regulation of gene expression, epigenetic (GO:0045815)	2/48	0.0214291	0.268248	-1.57743	6.06209	SLC50A1;ATAD2B
negative regulation of cell aging (GO:0090344)	1/16	0.0726328	0.274489	-2.30507	6.04467	RBL1
glycerophospholipid biosynthetic process (GO:0046474)	3/165	0.0428629	0.268248	-1.91753	6.03974	ETNK1;DGKA;CPNE1
regulation of transferase activity (GO:0051338)	1/15	0.0682502	0.274489	-2.2474	6.0333	SMG6
purine-containing compound salvage (GO:0043101)	1/15	0.0682502	0.274489	-2.22183	5.96468	AMPD2
intracellular protein transport (GO:0006886)	5/348	0.0241845	0.268248	-1.59228	5.92654	NUP214;TBC1D10C;RAB3GAP2;TSC2;ARHGEF2
DNA replication-independent nucleosome organization (GO:0034724)	1/14	0.0638472	0.274489	-2.15187	5.92036	CABIN1
regulation of retinoic acid receptor signaling pathway (GO:0048385)	1/14	0.0638472	0.274489	-2.14033	5.88862	ASXL1
protein kinase C-activating G-protein coupled receptor signaling pathway (GO:0007205)	1/13	0.0594237	0.268248	-2.07932	5.87004	DGKD
regulation of platelet-derived growth factor receptor signaling pathway (GO:0010640)	1/11	0.0505144	0.268248	-1.96408	5.86375	HGS
protein modification by small protein removal (GO:0070646)	5/262	0.00791558	0.154388	-1.20679	5.83956	ASXL1;RNF123;HGS;GPS1;SENP2
anoikis (GO:0043276)	1/10	0.0460284	0.268248	-1.88421	5.80052	TSC2
nucleoside salvage (GO:0043174)	1/15	0.0682502	0.274489	-2.14666	5.76286	UCKL1
regulation of nucleocytoplasmic transport (GO:0046822)	1/15	0.0682502	0.274489	-2.14636	5.76207	NUP214
pyrimidine-containing compound salvage (GO:0008655)	1/13	0.0594237	0.268248	-2.03226	5.73718	UCKL1
regulation of RNA metabolic process (GO:0051252)	2/40	0.0151811	0.222656	-1.3653	5.71748	CLK1;SON
inactivation of MAPK activity (GO:0000188)	1/21	0.0942413	0.284364	-2.4081	5.68769	GPS1
regulation of exosomal secretion (GO:1903541)	1/17	0.0769949	0.278619	-2.21173	5.6709	HGS
nuclear-transcribed mRNA catabolic process (GO:0000956)	4/175	0.00937973	0.165083	-1.21107	5.65472	CNOT6;UPF3B;MTPAP;SMG6
positive regulation of organelle assembly (GO:1902117)	2/48	0.0214291	0.268248	-1.46313	5.62281	CNOT6;RAB3GAP2
cellular response to osmotic stress (GO:0071470)	1/15	0.0682502	0.274489	-2.08513	5.59767	ARHGEF2
positive regulation of antigen receptor-mediated signaling pathway (GO:0050857)	1/17	0.0769949	0.278619	-2.16902	5.56139	TESPA1
chromosome organization (GO:0051276)	2/57	0.0295076	0.268248	-1.568	5.52422	CDT1;GPS1
pyrimidine nucleoside biosynthetic process (GO:0046134)	1/16	0.0726328	0.274489	-2.09979	5.50637	UCKL1
regulation of glucose transport (GO:0010827)	1/17	0.0769949	0.278619	-2.14143	5.49066	BRAF
regulation of intracellular signal transduction (GO:1902531)	5/423	0.0492519	0.268248	-1.80403	5.4316	FAM13B;CPNE1;ARHGEF1;ARHGEF2;GMIP
negative regulation of DNA-dependent DNA replication (GO:2000104)	1/16	0.0726328	0.274489	-2.06795	5.42286	TIMELESS
phosphorylation (GO:0016310)	5/387	0.0358446	0.268248	-1.61286	5.3685	MAP4K2;DGKD;DGKA;ULK1;BRAF
hexose transport (GO:0008645)	1/17	0.0769949	0.278619	-2.08519	5.34647	SLC50A1
negative regulation of telomere maintenance (GO:0032205)	1/18	0.0813367	0.278619	-2.1288	5.34149	SMG6
regulation of phosphate metabolic process (GO:0019220)	1/15	0.0682502	0.274489	-1.98643	5.33273	SMG6
gene expression (GO:0010467)	6/412	0.0131246	0.207301	-1.22366	5.30244	NUP214;UPF3B;RRBP1;PTMA;SMG6;WDR33
positive chemotaxis (GO:0050918)	1/18	0.0813367	0.278619	-2.10893	5.29163	TSC2
regulation of telomere maintenance via telomere lengthening (GO:1904356)	1/18	0.0813367	0.278619	-2.08032	5.21985	SMG6
nucleobase-containing compound biosynthetic process (GO:0034654)	1/18	0.0813367	0.278619	-2.07712	5.21183	AMPD2
positive regulation of lymphocyte migration (GO:2000403)	1/18	0.0813367	0.278619	-2.05575	5.1582	DOCK8
response to nutrient levels (GO:0031667)	1/19	0.0856583	0.282411	-2.0937	5.14504	ULK1
establishment of protein localization to endoplasmic reticulum (GO:0072599)	1/16	0.0726328	0.274489	-1.96182	5.14457	RAB3GAP2
protein import (GO:0017038)	2/57	0.0295076	0.268248	-1.45852	5.13854	NUP214;TSC2
regulation of DNA-dependent DNA replication (GO:0090329)	1/13	0.0594237	0.268248	-1.81668	5.12861	CDT1
macrophage activation (GO:0042116)	1/18	0.0813367	0.278619	-2.04109	5.12143	SBNO2
protein sumoylation (GO:0016925)	2/69	0.0418375	0.268248	-1.59434	5.06038	NUP214;SENP2
positive regulation of phosphoprotein phosphatase activity (GO:0032516)	1/16	0.0726328	0.274489	-1.89668	4.97375	PPP1R12A
negative regulation of chromatin silencing (GO:0031936)	1/10	0.0460284	0.268248	-1.61012	4.95674	ATAD2B
negative regulation of microtubule depolymerization (GO:0007026)	1/19	0.0856583	0.282411	-2.01638	4.95503	ARHGEF2
positive regulation of protein complex assembly (GO:0031334)	2/89	0.0657859	0.274489	-1.79152	4.87537	CDT1;SPIDR
cyclic nucleotide biosynthetic process (GO:0009190)	1/20	0.0899598	0.282411	-2.01827	4.86079	AMPD2
regulation of gene expression (GO:0010468)	9/1038	0.0550211	0.268248	-1.67352	4.85328	CLK1;SBNO2;RBL1;SON;YTHDC1;DENND4A;HGS;CPNE1;BRAF
regulation of neuron migration (GO:2001222)	1/20	0.0899598	0.282411	-2.00205	4.82172	ARHGEF2
axon extension (GO:0048675)	1/21	0.0942413	0.284364	-2.02905	4.7924	ULK1
regulation of DNA binding (GO:0051101)	2/53	0.0257862	0.268248	-1.29828	4.74901	CDT1;CPNE1
regulation of cellular protein localization (GO:1903827)	1/26	0.115351	0.297308	-2.17122	4.68935	SPIDR
morphogenesis of an epithelium (GO:0002009)	1/20	0.0899598	0.282411	-1.94166	4.67628	TIMELESS
osteoclast differentiation (GO:0030316)	1/20	0.0899598	0.282411	-1.91799	4.61927	SBNO2
negative regulation of macroautophagy (GO:0016242)	1/22	0.0985028	0.286216	-1.98994	4.61203	TSC2
RNA transport (GO:0050658)	2/81	0.055743	0.268248	-1.59359	4.6007	NUP214;UPF3B
negative regulation of platelet-derived growth factor receptor signaling pathway (GO:0010642)	1/16	0.0726328	0.274489	-1.75235	4.59526	HGS
histone mRNA metabolic process (GO:0008334)	1/25	0.111169	0.292649	-2.06262	4.53098	MTPAP
regulation of vascular endothelial growth factor receptor signaling pathway (GO:0030947)	1/23	0.102744	0.287685	-1.98515	4.51723	HGS
negative regulation of protein depolymerization (GO:1901880)	1/21	0.0942413	0.284364	-1.91217	4.51634	ARHGEF2
positive regulation of T cell migration (GO:2000406)	1/21	0.0942413	0.284364	-1.89179	4.46822	DOCK8
sulfur compound transport (GO:0072348)	1/20	0.0899598	0.282411	-1.84947	4.45425	SLC6A6
myeloid dendritic cell activation (GO:0001773)	1/15	0.0682502	0.274489	-1.65861	4.45267	DOCK2
telomere maintenance via telomerase (GO:0007004)	1/21	0.0942413	0.284364	-1.87801	4.43568	SMG6
stress-activated MAPK cascade (GO:0051403)	2/63	0.035462	0.268248	-1.32757	4.43316	MAP4K2;GPS1
non-motile cilium assembly (GO:1905515)	1/22	0.0985028	0.286216	-1.90798	4.42206	TOGARAM1
phosphatidylethanolamine biosynthetic process (GO:0006646)	1/16	0.0726328	0.274489	-1.6826	4.41236	ETNK1
mRNA cis splicing, via spliceosome (GO:0045292)	1/18	0.0813367	0.278619	-1.75464	4.40267	PRPF39
posttranscriptional gene silencing by RNA (GO:0035194)	1/19	0.0856583	0.282411	-1.78229	4.37977	CNOT6
regulation of dephosphorylation (GO:0035303)	1/19	0.0856583	0.282411	-1.77439	4.36036	SMG6
RNA-dependent DNA biosynthetic process (GO:0006278)	1/22	0.0985028	0.286216	-1.86316	4.31818	SMG6
cellular response to alkaloid (GO:0071312)	1/22	0.0985028	0.286216	-1.85137	4.29087	SPIDR
RNA 3'-end processing (GO:0031123)	2/62	0.0344396	0.268248	-1.27329	4.28913	UPF3B;WDR33
phosphatidylethanolamine metabolic process (GO:0046337)	1/21	0.0942413	0.284364	-1.80799	4.27029	ETNK1
regulation of microtubule depolymerization (GO:0031114)	1/23	0.102744	0.287685	-1.87444	4.26532	ARHGEF2
mitotic recombination (GO:0006312)	1/19	0.0856583	0.282411	-1.73022	4.25183	SMC5
regulation of nuclear division (GO:0051783)	1/22	0.0985028	0.286216	-1.82754	4.23563	FBXO5
cellular response to interleukin-6 (GO:0071354)	1/24	0.106966	0.291555	-1.88416	4.21156	SBNO2
nuclear import (GO:0051170)	2/72	0.0451746	0.268248	-1.34864	4.17704	NUP214;TSC2
positive regulation of neurogenesis (GO:0050769)	2/70	0.0429391	0.268248	-1.323	4.16477	CPNE1;ARHGEF2
positive regulation of exosomal secretion (GO:1903543)	1/16	0.0726328	0.274489	-1.58715	4.16204	HGS
amino acid transmembrane transport (GO:0003333)	1/30	0.131889	0.310089	-2.03873	4.13006	SLC6A6
termination of RNA polymerase II transcription (GO:0006369)	2/69	0.0418375	0.268248	-1.28735	4.086	UPF3B;WDR33
regulation of JNK cascade (GO:0046328)	2/91	0.0683849	0.274489	-1.52133	4.08112	MAP4K2;MAPK8IP3
regulation of cellular senescence (GO:2000772)	1/25	0.111169	0.292649	-1.85677	4.07878	RBL1
negative regulation of intracellular signal transduction (GO:1902532)	3/162	0.0409576	0.268248	-1.27479	4.07323	ADGRG3;CPNE1;TSC2
nucleotide-excision repair, DNA damage recognition (GO:0000715)	1/24	0.106966	0.291555	-1.8212	4.07082	GPS1
tube closure (GO:0060606)	1/30	0.131889	0.310089	-1.99298	4.03738	TSC2
positive regulation of cellular protein localization (GO:1903829)	2/67	0.0396673	0.268248	-1.24357	4.01328	CDT1;PCNT
protein targeting to lysosome (GO:0006622)	1/20	0.0899598	0.282411	-1.66579	4.01188	HGS
nuclear-transcribed mRNA catabolic process, nonsense-mediated decay (GO:0000184)	2/113	0.0990106	0.286341	-1.73083	4.0026	UPF3B;SMG6
negative regulation of microtubule polymerization or depolymerization (GO:0031111)	1/28	0.123659	0.303481	-1.91119	3.99482	ARHGEF2
negative regulation of cell cycle G1/S phase transition (GO:1902807)	1/23	0.102744	0.287685	-1.74966	3.98138	RBL1
purine-containing compound biosynthetic process (GO:0072522)	1/23	0.102744	0.287685	-1.74751	3.97647	AMPD2
regulation of DNA biosynthetic process (GO:2000278)	1/23	0.102744	0.287685	-1.74022	3.95989	SMG6
regulation of T cell migration (GO:2000404)	1/18	0.0813367	0.278619	-1.56632	3.93013	DOCK8
positive regulation of microtubule polymerization (GO:0031116)	1/25	0.111169	0.292649	-1.7832	3.91716	TOGARAM1
regulation of necroptotic process (GO:0060544)	1/17	0.0769949	0.278619	-1.52129	3.90062	ARHGEF2
regulation of Wnt signaling pathway (GO:0030111)	2/110	0.0946342	0.284364	-1.64903	3.88798	TSC2;SENP2
mRNA metabolic process (GO:0016071)	2/98	0.0777403	0.278619	-1.50214	3.83703	SON;WDR33
protein localization to nucleus (GO:0034504)	2/97	0.07638	0.278619	-1.48131	3.80997	NUP214;TSC2
negative regulation of signal transduction (GO:0009968)	4/284	0.0449981	0.268248	-1.2264	3.80322	ASXL1;HGS;TSC2;BRAF
regulation of telomere capping (GO:1904353)	1/24	0.106966	0.291555	-1.69099	3.77977	SMG6
positive regulation of glucose transport (GO:0010828)	1/26	0.115351	0.297308	-1.74177	3.76182	BRAF
telomere maintenance via telomere lengthening (GO:0010833)	1/28	0.123659	0.303481	-1.79269	3.74713	SMG6
negative regulation of cell cycle process (GO:0010948)	2/82	0.0569663	0.268248	-1.30694	3.74477	CDT1;FBXO5
regulation of mitotic cell cycle (GO:0007346)	3/166	0.0435078	0.268248	-1.19019	3.73101	MAP4K2;RBL1;FBXO5
axoneme assembly (GO:0035082)	1/25	0.111169	0.292649	-1.69085	3.71429	TOGARAM1
regulation of T cell receptor signaling pathway (GO:0050856)	1/27	0.119515	0.302967	-1.73921	3.69463	TESPA1
negative regulation of insulin receptor signaling pathway (GO:0046627)	1/26	0.115351	0.297308	-1.70841	3.68977	TSC2
protein targeting to vacuole (GO:0006623)	1/28	0.123659	0.303481	-1.76291	3.68488	HGS
RNA phosphodiester bond hydrolysis (GO:0090501)	1/29	0.127783	0.306282	-1.76128	3.6237	WDR33
protein export from nucleus (GO:0006611)	1/29	0.127783	0.306282	-1.76052	3.62213	NUP214
primary neural tube formation (GO:0014020)	1/29	0.127783	0.306282	-1.75567	3.61216	TSC2
cellular senescence (GO:0090398)	1/25	0.111169	0.292649	-1.63226	3.5856	SMC5
negative regulation of G1/S transition of mitotic cell cycle (GO:2000134)	1/25	0.111169	0.292649	-1.63149	3.58389	RBL1
positive regulation of microtubule polymerization or depolymerization (GO:0031112)	1/25	0.111169	0.292649	-1.6278	3.5758	TOGARAM1
cyclic purine nucleotide metabolic process (GO:0052652)	1/31	0.135975	0.314889	-1.79205	3.57566	AMPD2
purine ribonucleoside monophosphate biosynthetic process (GO:0009168)	1/40	0.171905	0.33617	-2.01867	3.55449	AMPD2
regulation of intracellular protein transport (GO:0033157)	1/34	0.14812	0.315715	-1.85956	3.55127	PCNT
negative regulation of cellular response to insulin stimulus (GO:1900077)	1/27	0.119515	0.302967	-1.66148	3.5295	TSC2
response to calcium ion (GO:0051592)	2/80	0.0545292	0.268248	-1.21289	3.52831	CPNE1;BRAF
establishment of protein localization to membrane (GO:0090150)	2/84	0.059441	0.268248	-1.24768	3.52191	RAB3GAP2;BRAF
positive regulation of exocytosis (GO:0045921)	1/35	0.15213	0.316353	-1.84655	3.47709	HGS
negative regulation of hydrolase activity (GO:0051346)	2/109	0.0931883	0.284364	-1.46237	3.47041	PPP1R12A;GMIP
negative regulation of cellular protein localization (GO:1903828)	1/26	0.115351	0.297308	-1.59465	3.44408	CDT1
cellular response to ketone (GO:1901655)	1/29	0.127783	0.306282	-1.67168	3.43935	NDOR1
regulation of phosphoprotein phosphatase activity (GO:0043666)	1/36	0.156122	0.316353	-1.82109	3.38197	PPP1R12A
positive regulation of DNA replication (GO:0045740)	1/36	0.156122	0.316353	-1.80163	3.34583	CDT1
nucleobase-containing small molecule interconversion (GO:0015949)	1/32	0.140042	0.315715	-1.69166	3.32549	TXNRD1
regulation of macroautophagy (GO:0016241)	2/117	0.104933	0.291165	-1.4731	3.321	TSC2;ULK1
regulation of telomere maintenance (GO:0032204)	1/26	0.115351	0.297308	-1.53751	3.32067	SMG6
positive regulation of cytokine-mediated signaling pathway (GO:0001961)	1/34	0.14812	0.315715	-1.73858	3.32023	CPNE1
regulation of sodium ion transmembrane transport (GO:1902305)	1/31	0.135975	0.314889	-1.66233	3.31682	UTRN
regulation of double-strand break repair via homologous recombination (GO:0010569)	1/28	0.123659	0.303481	-1.58219	3.30714	SPIDR
nuclear export (GO:0051168)	2/93	0.0710174	0.274489	-1.24702	3.29815	NUP214;UPF3B
gene silencing by miRNA (GO:0035195)	1/32	0.140042	0.315715	-1.67043	3.28375	CNOT6
carboxylic acid transmembrane transport (GO:1905039)	1/36	0.156122	0.316353	-1.75663	3.26226	SLC6A6
regulation of neuron differentiation (GO:0045664)	2/85	0.0606921	0.270915	-1.15582	3.23855	CPNE1;ARHGEF2
cellular response to DNA damage stimulus (GO:0006974)	4/330	0.0701603	0.274489	-1.21746	3.23475	FANCA;TIMELESS;SMC5;SPIDR
regulation of GTPase activity (GO:0043087)	3/189	0.059659	0.268248	-1.13315	3.19446	DOCK8;RAB3GAP2;GMIP
microtubule bundle formation (GO:0001578)	1/33	0.14409	0.315715	-1.64789	3.19248	TOGARAM1
regulation of chromosome segregation (GO:0051983)	1/30	0.131889	0.310089	-1.5753	3.19123	SMC5
DNA-templated transcription, termination (GO:0006353)	2/107	0.0903164	0.282411	-1.32547	3.18701	UPF3B;WDR33
negative regulation of GTPase activity (GO:0034260)	1/23	0.102744	0.287685	-1.39918	3.18385	GMIP
positive regulation of organelle organization (GO:0010638)	1/34	0.14812	0.315715	-1.65705	3.16452	RAB3GAP2
neural tube closure (GO:0001843)	1/34	0.14812	0.315715	-1.6548	3.16023	TSC2
cell cycle G2/M phase transition (GO:0044839)	2/128	0.121689	0.303481	-1.49466	3.14818	PPP1R12A;PCNT
negative regulation of macromolecule metabolic process (GO:0010605)	2/125	0.117055	0.30044	-1.45448	3.12003	RBL1;CPNE1
nuclear-transcribed mRNA poly(A) tail shortening (GO:0000289)	1/30	0.131889	0.310089	-1.53281	3.10517	CNOT6
protein destabilization (GO:0031648)	1/32	0.140042	0.315715	-1.56554	3.07755	SENP2
cellular response to alcohol (GO:0097306)	1/29	0.127783	0.306282	-1.49046	3.0665	SPIDR
protein deubiquitination (GO:0016579)	3/258	0.121719	0.303481	-1.4514	3.05671	ASXL1;RNF123;HGS
positive regulation of T cell differentiation (GO:0045582)	1/33	0.14409	0.315715	-1.56794	3.03759	TESPA1
protein localization to lysosome (GO:0061462)	1/31	0.135975	0.314889	-1.51759	3.02802	HGS
DNA-dependent DNA replication maintenance of fidelity (GO:0045005)	1/36	0.156122	0.316353	-1.62868	3.02464	TIMELESS
protein kinase B signaling (GO:0043491)	1/36	0.156122	0.316353	-1.62349	3.015	TSC2
positive regulation of tumor necrosis factor superfamily cytokine production (GO:1903557)	1/33	0.14409	0.315715	-1.55363	3.00987	ARHGEF2
multivesicular body assembly (GO:0036258)	1/31	0.135975	0.314889	-1.50098	2.99488	HGS
regulation of autophagosome assembly (GO:2000785)	1/34	0.14812	0.315715	-1.56615	2.99093	RAB3GAP2
tRNA export from nucleus (GO:0006409)	1/34	0.14812	0.315715	-1.56248	2.98392	NUP214
negative regulation of catalytic activity (GO:0043086)	1/27	0.119515	0.302967	-1.40039	2.97488	PPP1R12A
protein import into nucleus (GO:0006606)	2/104	0.0860597	0.282411	-1.20949	2.96653	NUP214;TSC2
negative regulation of fat cell differentiation (GO:0045599)	1/33	0.14409	0.315715	-1.52615	2.95664	ASXL1
regulation of lipid metabolic process (GO:0019216)	2/101	0.0818668	0.278619	-1.17918	2.95108	RBL1;TXNRD1
regulation of coenzyme metabolic process (GO:0051196)	1/40	0.171905	0.33617	-1.67374	2.94714	NUP214
tRNA-containing ribonucleoprotein complex export from nucleus (GO:0071431)	1/34	0.14812	0.315715	-1.53901	2.9391	NUP214
cellular response to metal ion (GO:0071248)	2/101	0.0818668	0.278619	-1.17383	2.93769	CPNE1;BRAF
negative regulation of protein complex assembly (GO:0031333)	1/36	0.156122	0.316353	-1.57606	2.92692	ULK1
negative regulation of extrinsic apoptotic signaling pathway via death domain receptors (GO:1902042)	1/32	0.140042	0.315715	-1.4681	2.88601	ARHGEF2
multivesicular body organization (GO:0036257)	1/32	0.140042	0.315715	-1.46531	2.88053	HGS
regulation of extrinsic apoptotic signaling pathway via death domain receptors (GO:1902041)	1/40	0.171905	0.33617	-1.62324	2.85823	ARHGEF2
regulation of organelle organization (GO:0033043)	2/114	0.100482	0.287685	-1.2383	2.84533	CDT1;TBC1D10C
positive regulation of cell-matrix adhesion (GO:0001954)	1/34	0.14812	0.315715	-1.48903	2.84365	UTRN
regulation of DNA recombination (GO:0000018)	1/34	0.14812	0.315715	-1.48753	2.84079	SPIDR
cellular protein localization (GO:0034613)	4/328	0.0689412	0.274489	-1.06099	2.83763	HGS;TBC1D10C;RAB3GAP2;ARHGEF2
regulation of ubiquitin protein ligase activity (GO:1904666)	1/37	0.160096	0.323341	-1.51861	2.78207	FBXO5
regulation of sodium ion transmembrane transporter activity (GO:2000649)	1/38	0.164051	0.327039	-1.53229	2.76973	UTRN
positive regulation of ubiquitin-protein transferase activity (GO:0051443)	1/32	0.140042	0.315715	-1.40811	2.76808	FBXO5
peptidyl-lysine modification (GO:0018205)	2/116	0.103443	0.288331	-1.21338	2.75284	NUP214;SENP2
regulation of interleukin-6 production (GO:0032675)	1/43	0.18355	0.341592	-1.61682	2.74094	ARHGEF2
negative regulation of protein modification by small protein conjugation or removal (GO:1903321)	1/47	0.198825	0.346633	-1.68858	2.72762	SENP2
tRNA transport (GO:0051031)	1/36	0.156122	0.316353	-1.45912	2.70975	NUP214
nuclear envelope disassembly (GO:0051081)	1/47	0.198825	0.346633	-1.67046	2.69834	NUP214
positive regulation of neuron differentiation (GO:0045666)	2/99	0.0791082	0.278619	-1.06298	2.69672	CPNE1;ARHGEF2
regulation of signal transduction (GO:0009966)	3/234	0.098039	0.286216	-1.15302	2.67777	TSC2;BRAF;SENP2
vesicle-mediated transport (GO:0016192)	4/411	0.128374	0.306506	-1.30259	2.67396	TBC1D10C;CPNE1;TSC2;MAPK8IP3
regulation of stress-activated MAPK cascade (GO:0032872)	1/42	0.179687	0.339481	-1.55711	2.67284	MAPK8IP3
regulation of defense response to virus by virus (GO:0050690)	1/29	0.127783	0.306282	-1.29864	2.67185	DOCK2
exonucleolytic nuclear-transcribed mRNA catabolic process involved in deadenylation-dependent decay (GO:0043928)	1/34	0.14812	0.315715	-1.3893	2.65319	CNOT6
macroautophagy (GO:0016236)	2/111	0.0960866	0.286216	-1.13161	2.6508	HGS;ULK1
regulation of insulin receptor signaling pathway (GO:0046626)	1/35	0.15213	0.316353	-1.406	2.64752	TSC2
negative regulation of protein kinase B signaling (GO:0051898)	1/36	0.156122	0.316353	-1.41781	2.63304	TSC2
phosphatidic acid metabolic process (GO:0046473)	1/42	0.179687	0.339481	-1.53007	2.62644	DGKA
positive regulation of phagocytosis (GO:0050766)	1/40	0.171905	0.33617	-1.48904	2.62191	DOCK2
G1/S transition of mitotic cell cycle (GO:0000082)	2/106	0.0888906	0.282411	-1.08176	2.61825	CDT1;FBXO5
cellular response to radiation (GO:0071478)	1/43	0.18355	0.341592	-1.53784	2.60706	SPIDR
negative regulation of DNA binding (GO:0043392)	1/35	0.15213	0.316353	-1.38203	2.60239	CPNE1
regulation of G1/S transition of mitotic cell cycle (GO:2000045)	1/47	0.198825	0.346633	-1.59949	2.5837	RBL1
negative regulation of ERBB signaling pathway (GO:1901185)	1/44	0.187396	0.343559	-1.53881	2.57678	HGS
posttranscriptional regulation of gene expression (GO:0010608)	1/45	0.191224	0.344155	-1.55026	2.56462	YTHDC1
cellular response to ionizing radiation (GO:0071479)	1/47	0.198825	0.346633	-1.56878	2.53409	SPIDR
positive regulation of cellular component organization (GO:0051130)	2/107	0.0903164	0.282411	-1.0533	2.5326	CDT1;SPIDR
mitotic cell cycle phase transition (GO:0044772)	3/222	0.0869904	0.282411	-1.03426	2.52561	CDT1;PPP1R12A;PCNT
positive regulation of mitotic nuclear division (GO:0045840)	1/41	0.175805	0.33737	-1.44615	2.51396	SMC5
mitotic metaphase plate congression (GO:0007080)	1/44	0.187396	0.343559	-1.50076	2.51307	CDT1
regulation of telomerase activity (GO:0051972)	1/43	0.18355	0.341592	-1.4693	2.49086	SMG6
DNA repair (GO:0006281)	3/289	0.155032	0.316353	-1.32784	2.47527	FANCA;TIMELESS;WDR33
nuclear-transcribed mRNA catabolic process, exonucleolytic (GO:0000291)	1/36	0.156122	0.316353	-1.32707	2.46451	CNOT6
negative regulation of STAT cascade (GO:1904893)	1/42	0.179687	0.339481	-1.4341	2.46169	HGS
regulation of phagocytosis (GO:0050764)	1/42	0.179687	0.339481	-1.42123	2.43961	DOCK2
regulation of DNA metabolic process (GO:0051052)	1/47	0.198825	0.346633	-1.50601	2.4327	SMG6
neutrophil degranulation (GO:0043312)	4/480	0.189569	0.344155	-1.45965	2.42741	ADGRG3;TBC1D10C;CPNE1;DOCK2
phospholipid biosynthetic process (GO:0008654)	1/38	0.164051	0.327039	-1.34053	2.42311	CPNE1
microtubule cytoskeleton organization involved in mitosis (GO:1902850)	1/45	0.191224	0.344155	-1.45824	2.41239	PCNT
autophagosome organization (GO:1905037)	1/57	0.235787	0.378242	-1.66885	2.4112	ULK1
G2/M transition of mitotic cell cycle (GO:0000086)	2/127	0.120139	0.303302	-1.13446	2.40405	PPP1R12A;PCNT
negative regulation of response to stimulus (GO:0048585)	2/128	0.121689	0.303481	-1.13842	2.39785	RBL1;BRAF
positive regulation of intracellular transport (GO:0032388)	1/45	0.191224	0.344155	-1.44391	2.38867	PCNT
negative regulation of epidermal growth factor receptor signaling pathway (GO:0042059)	1/41	0.175805	0.33737	-1.37266	2.38621	HGS
epidermal growth factor receptor signaling pathway (GO:0007173)	1/58	0.239389	0.380061	-1.65551	2.36682	DGKD
phosphatidic acid biosynthetic process (GO:0006654)	1/41	0.175805	0.33737	-1.36144	2.3667	DGKA
positive regulation of macromolecule biosynthetic process (GO:0010557)	2/143	0.145488	0.315715	-1.2209	2.35348	RAB3GAP2;UPF3B
positive regulation of tumor necrosis factor production (GO:0032760)	1/48	0.2026	0.349584	-1.46973	2.34647	ARHGEF2
regulation of ion transmembrane transporter activity (GO:0032412)	1/43	0.18355	0.341592	-1.37948	2.33859	UTRN
regulation of ATP metabolic process (GO:1903578)	1/44	0.187396	0.343559	-1.39137	2.32989	NUP214
regulation of microtubule polymerization (GO:0031113)	1/36	0.156122	0.316353	-1.24779	2.31729	TOGARAM1
negative regulation of TOR signaling (GO:0032007)	1/41	0.175805	0.33737	-1.33038	2.31271	TSC2
interstrand cross-link repair (GO:0036297)	1/49	0.206357	0.353099	-1.46089	2.3055	FANCA
actin filament organization (GO:0007015)	2/121	0.110949	0.292649	-1.04192	2.29085	SPTA1;ARHGEF2
neutrophil mediated immunity (GO:0002446)	4/488	0.197207	0.346633	-1.40451	2.28022	ADGRG3;TBC1D10C;CPNE1;DOCK2
mitotic nuclear envelope disassembly (GO:0007077)	1/45	0.191224	0.344155	-1.37655	2.27725	NUP214
negative regulation of mitotic cell cycle (GO:0045930)	1/49	0.206357	0.353099	-1.4339	2.2629	CDT1
positive regulation of interleukin-6 production (GO:0032755)	1/44	0.187396	0.343559	-1.34038	2.24451	ARHGEF2
regulation of Rho protein signal transduction (GO:0035023)	1/58	0.239389	0.380061	-1.56673	2.2399	ARHGEF2
mRNA processing (GO:0006397)	3/284	0.149474	0.316353	-1.1779	2.23875	SON;UPF3B;WDR33
spliceosomal complex assembly (GO:0000245)	1/42	0.179687	0.339481	-1.29318	2.2198	YTHDC1
regulation of carbohydrate catabolic process (GO:0043470)	1/38	0.164051	0.327039	-1.22613	2.21633	NUP214
response to retinoic acid (GO:0032526)	1/58	0.239389	0.380061	-1.53708	2.1975	ASXL1
protein transport (GO:0015031)	3/327	0.199201	0.346633	-1.34697	2.17325	TBC1D10C;RAB3GAP2;ARHGEF2
positive regulation of cellular amide metabolic process (GO:0034250)	1/62	0.25363	0.389617	-1.58136	2.16943	UPF3B
positive regulation of transport (GO:0051050)	1/45	0.191224	0.344155	-1.31047	2.16792	BRAF
activation of MAPK activity (GO:0000187)	2/118	0.106428	0.291555	-0.966147	2.16444	MAP4K2;MAPK8IP3
DNA replication-independent nucleosome assembly (GO:0006336)	1/40	0.171905	0.33617	-1.2284	2.16299	CABIN1
amino acid transport (GO:0006865)	1/49	0.206357	0.353099	-1.36967	2.16155	SLC6A6
nucleosome assembly (GO:0006334)	1/61	0.250095	0.388057	-1.55516	2.15532	CABIN1
regulation of mitotic cell cycle phase transition (GO:1901990)	2/185	0.216032	0.365105	-1.39733	2.14116	FBXO5;PCNT
negative regulation of JAK-STAT cascade (GO:0046426)	1/48	0.2026	0.349584	-1.33959	2.13868	HGS
cell morphogenesis (GO:0000902)	1/60	0.246543	0.386439	-1.51695	2.12406	ARHGEF2
regulation of protein metabolic process (GO:0051246)	1/60	0.246543	0.386439	-1.51391	2.11981	HGS
regulation of apoptotic process (GO:0042981)	6/816	0.185565	0.343559	-1.25571	2.11505	MAP4K2;RBM25;SON;BRAF;ARHGEF1;ARHGEF2
postreplication repair (GO:0006301)	1/48	0.2026	0.349584	-1.31382	2.09754	WDR33
negative regulation of Wnt signaling pathway (GO:0030178)	2/175	0.198872	0.346633	-1.29347	2.08908	TSC2;TMEM131L
type I interferon signaling pathway (GO:0060337)	1/66	0.267608	0.394369	-1.58455	2.08881	IRF9
regulation of intracellular transport (GO:0032386)	1/41	0.175805	0.33737	-1.19417	2.07592	NUP214
regulation of generation of precursor metabolites and energy (GO:0043467)	1/47	0.198825	0.346633	-1.28135	2.06979	NUP214
cellular protein modification process (GO:0006464)	7/1002	0.191632	0.344155	-1.24667	2.05973	MAP4K2;PPP1R12A;GPS1;UBXN7;ULK1;BRAF;WDYHV1
protein complex subunit organization (GO:0071822)	1/46	0.195033	0.346633	-1.2533	2.04863	CDT1
positive regulation of transcription from RNA polymerase II promoter (GO:0045944)	6/849	0.209489	0.357465	-1.30244	2.03582	ASXL1;SBNO2;RBL1;PPP1R12A;ARHGEF2;ATAD2B
regulation of tumor necrosis factor-mediated signaling pathway (GO:0010803)	1/57	0.235787	0.378242	-1.40374	2.02815	CPNE1
regulation of glycolytic process (GO:0006110)	1/58	0.239389	0.380061	-1.41658	2.02524	NUP214
cellular response to nutrient levels (GO:0031669)	1/55	0.228532	0.375369	-1.36712	2.01797	ULK1
protein localization to membrane (GO:0072657)	2/161	0.175171	0.33737	-1.15517	2.0123	HGS;BRAF
regulation of vesicle-mediated transport (GO:0060627)	2/139	0.139047	0.315715	-1.00687	1.98649	TBC1D10C;TSC2
spermatogenesis (GO:0007283)	2/154	0.163505	0.327039	-1.08663	1.96779	HERC4;WDR33
regulation of telomere maintenance via telomerase (GO:0032210)	1/52	0.217522	0.365105	-1.27895	1.95099	SMG6
second-messenger-mediated signaling (GO:0019932)	1/63	0.257149	0.391121	-1.42997	1.94204	DGKD
positive regulation of autophagy (GO:0010508)	1/68	0.274499	0.40069	-1.49708	1.93544	TSC2
intracellular transport of virus (GO:0075733)	1/55	0.228532	0.375369	-1.28591	1.89811	NUP214
transport of virus (GO:0046794)	1/55	0.228532	0.375369	-1.28069	1.8904	NUP214
negative regulation of protein ubiquitination (GO:0031397)	1/51	0.213818	0.362842	-1.22303	1.88669	SENP2
positive regulation of cell-substrate adhesion (GO:0010811)	1/53	0.221209	0.368284	-1.2488	1.88399	UTRN
regulation of gene silencing by RNA (GO:0060966)	1/56	0.232168	0.375369	-1.28608	1.87806	NUP214
regulation of posttranscriptional gene silencing (GO:0060147)	1/56	0.232168	0.375369	-1.28252	1.87285	NUP214
telomere maintenance (GO:0000723)	1/52	0.217522	0.365105	-1.22601	1.87022	SMC5
regulation of epidermal growth factor receptor signaling pathway (GO:0042058)	1/59	0.242975	0.383775	-1.31321	1.85793	HGS
negative regulation of cellular component organization (GO:0051129)	1/55	0.228532	0.375369	-1.25756	1.85625	ULK1
B cell differentiation (GO:0030183)	1/53	0.221209	0.368284	-1.21779	1.83721	ADGRG3
negative regulation of cellular response to growth factor stimulus (GO:0090288)	1/56	0.232168	0.375369	-1.25695	1.83552	HGS
myeloid leukocyte differentiation (GO:0002573)	1/51	0.213818	0.362842	-1.17561	1.81353	SBNO2
carboxylic acid transport (GO:0046942)	1/52	0.217522	0.365105	-1.1873	1.81117	SLC6A6
autophagosome assembly (GO:0000045)	1/59	0.242975	0.383775	-1.2664	1.7917	ULK1
MAPK cascade (GO:0000165)	3/279	0.143983	0.315715	-0.924151	1.79106	SPTA1;MAP4K2;BRAF
positive regulation of protein transport (GO:0051222)	1/57	0.235787	0.378242	-1.23727	1.78764	PCNT
nuclear-transcribed mRNA catabolic process, deadenylation-dependent decay (GO:0000288)	1/64	0.260652	0.393273	-1.31136	1.76321	CNOT6
regulation of vesicle fusion (GO:0031338)	1/62	0.25363	0.389617	-1.26344	1.73329	TBC1D10C
regulation of JAK-STAT cascade (GO:0046425)	1/66	0.267608	0.394369	-1.30787	1.72408	HGS
positive regulation of peptidyl-serine phosphorylation (GO:0033138)	1/84	0.327367	0.423314	-1.54163	1.7215	BRAF
regulation of protein kinase B signaling (GO:0051896)	2/164	0.180211	0.339481	-0.99975	1.7132	CPNE1;TSC2
regulation of gene silencing by miRNA (GO:0060964)	1/68	0.274499	0.40069	-1.32485	1.71278	NUP214
cellular macromolecule biosynthetic process (GO:0034645)	3/368	0.24975	0.388057	-1.22487	1.69926	TIMELESS;RRBP1;PTMA
male gamete generation (GO:0048232)	2/155	0.165162	0.328194	-0.939962	1.69271	HERC4;WDR33
regulation of cell-matrix adhesion (GO:0001952)	1/53	0.221209	0.368284	-1.1196	1.68909	UTRN
regulation of cellular catabolic process (GO:0031329)	1/56	0.232168	0.375369	-1.14647	1.67419	ULK1
stress-activated protein kinase signaling cascade (GO:0031098)	1/71	0.284715	0.405983	-1.30071	1.63404	MAP4K2
nitrogen compound transport (GO:0071705)	1/75	0.298116	0.410827	-1.3424	1.62467	SLC6A6
mitotic cytokinesis (GO:0000281)	1/60	0.246543	0.386439	-1.14842	1.60804	SON
neutrophil activation involved in immune response (GO:0002283)	4/484	0.193376	0.346278	-0.961362	1.57963	ADGRG3;TBC1D10C;CPNE1;DOCK2
positive regulation of ubiquitin protein ligase activity (GO:1904668)	1/83	0.324178	0.42308	-1.39117	1.5671	FBXO5
regulation of tumor necrosis factor production (GO:0032680)	1/62	0.25363	0.389617	-1.13844	1.5618	ARHGEF2
negative regulation of supramolecular fiber organization (GO:1902904)	1/55	0.228532	0.375369	-1.04489	1.54234	ARHGEF2
fat cell differentiation (GO:0045444)	1/56	0.232168	0.375369	-1.04675	1.52856	SENP2
viral process (GO:0016032)	2/221	0.278574	0.40282	-1.18587	1.51563	NUP214;DOCK2
regulation of peptidyl-tyrosine phosphorylation (GO:0050730)	1/86	0.333702	0.425591	-1.37435	1.50835	ARHGEF2
nucleic acid-templated transcription (GO:0097659)	1/77	0.304724	0.413458	-1.25969	1.49695	PTMA
negative regulation of intrinsic apoptotic signaling pathway (GO:2001243)	1/63	0.257149	0.391121	-1.0983	1.49159	ARHGEF2
positive regulation of protein modification by small protein conjugation or removal (GO:1903322)	1/66	0.267608	0.394369	-1.12569	1.48392	SENP2
transcription-coupled nucleotide-excision repair (GO:0006283)	1/74	0.29479	0.409911	-1.21264	1.48123	GPS1
muscle organ development (GO:0007517)	1/61	0.250095	0.388057	-1.06582	1.47713	UTRN
negative regulation of ubiquitin-protein ligase activity involved in mitotic cell cycle (GO:0051436)	1/72	0.288089	0.408956	-1.18544	1.47526	FBXO5
response to reactive oxygen species (GO:0000302)	1/61	0.250095	0.388057	-1.06222	1.47215	TXNRD1
glycerophospholipid metabolic process (GO:0006650)	1/65	0.264138	0.394369	-1.10326	1.46876	CPNE1
regulation of MAP kinase activity (GO:0043405)	1/88	0.339978	0.430033	-1.35126	1.45784	HGS
regulation of endocytosis (GO:0030100)	1/70	0.281326	0.404899	-1.14873	1.45687	TSC2
positive regulation of JNK cascade (GO:0046330)	1/77	0.304724	0.413458	-1.2256	1.45644	MAP4K2
proteolysis involved in cellular protein catabolic process (GO:0051603)	1/94	0.358456	0.442502	-1.40987	1.44646	RNF123
regulation of peptidyl-serine phosphorylation (GO:0033135)	1/87	0.336847	0.428715	-1.32423	1.44093	BRAF
negative regulation of MAP kinase activity (GO:0043407)	1/62	0.25363	0.389617	-1.04628	1.43536	GPS1
B cell activation (GO:0042113)	1/74	0.29479	0.409911	-1.17407	1.43411	ADGRG3
positive regulation of protein polymerization (GO:0032273)	1/65	0.264138	0.394369	-1.07504	1.43119	TOGARAM1
negative regulation of dephosphorylation (GO:0035305)	1/64	0.260652	0.393273	-1.0615	1.42727	PPP1R12A
negative regulation of angiogenesis (GO:0016525)	1/70	0.281326	0.404899	-1.12363	1.42503	HGS
DNA damage response, signal transduction by p53 class mediator resulting in cell cycle arrest (GO:0006977)	1/63	0.257149	0.391121	-1.04613	1.42075	CNOT6
regulation of translation (GO:0006417)	2/214	0.266378	0.394369	-1.06774	1.41245	NUP214;UPF3B
regulation of Ras protein signal transduction (GO:0046578)	1/91	0.349281	0.436601	-1.34135	1.41093	ARHGEF2
positive regulation of protein ubiquitination involved in ubiquitin-dependent protein catabolic process (GO:2000060)	1/88	0.339978	0.430033	-1.29602	1.39825	FBXO5
cellular response to type I interferon (GO:0071357)	1/66	0.267608	0.394369	-1.05993	1.39723	IRF9
cellular protein catabolic process (GO:0044257)	1/63	0.257149	0.391121	-1.02505	1.39212	RNF123
regulation of TOR signaling (GO:0032006)	1/68	0.274499	0.40069	-1.07483	1.38955	TSC2
positive regulation of GTPase activity (GO:0043547)	2/193	0.229858	0.375369	-0.943711	1.38753	DOCK8;TBC1D10C
negative regulation of mitotic cell cycle phase transition (GO:1901991)	1/80	0.314519	0.420035	-1.19801	1.38575	RBL1
positive regulation of endocytosis (GO:0045807)	1/65	0.264138	0.394369	-1.03227	1.37425	DOCK2
lymphocyte differentiation (GO:0030098)	1/74	0.29479	0.409911	-1.12257	1.37121	ADGRG3
axonogenesis (GO:0007409)	2/224	0.283798	0.405983	-1.08444	1.36584	SPTA1;ULK1
negative regulation of phosphatase activity (GO:0010923)	1/69	0.27792	0.40282	-1.05565	1.35168	PPP1R12A
positive regulation of transcription, DNA-templated (GO:0045893)	7/1121	0.274456	0.40069	-1.03795	1.34204	ASXL1;SBNO2;RBL1;PPP1R12A;SFR1;ARHGEF2;ATAD2B
interferon-gamma-mediated signaling pathway (GO:0060333)	1/71	0.284715	0.405983	-1.06545	1.33848	IRF9
purine ribonucleotide biosynthetic process (GO:0009152)	1/76	0.301428	0.41342	-1.11586	1.33817	AMPD2
positive regulation of ubiquitin-protein ligase activity involved in regulation of mitotic cell cycle transition (GO:0051437)	1/77	0.304724	0.413458	-1.12272	1.33419	FBXO5
regulation of hydrolase activity (GO:0051336)	1/81	0.317754	0.420035	-1.15535	1.32459	RAB3GAP2
ERBB signaling pathway (GO:0038127)	1/81	0.317754	0.420035	-1.13532	1.30163	DGKD
negative regulation of blood vessel morphogenesis (GO:2000181)	1/66	0.267608	0.394369	-0.986994	1.30109	HGS
lysosomal transport (GO:0007041)	1/73	0.291447	0.408956	-1.05518	1.30093	HGS
positive regulation of cell cycle arrest (GO:0071158)	1/83	0.324178	0.42308	-1.15087	1.29641	CNOT6
signal transduction involved in mitotic G1 DNA damage checkpoint (GO:0072431)	1/64	0.260652	0.393273	-0.960946	1.29206	CNOT6
mitotic spindle organization (GO:0007052)	1/75	0.298116	0.410827	-1.06366	1.28731	PCNT
negative regulation of ubiquitin protein ligase activity (GO:1904667)	1/78	0.308004	0.415165	-1.08936	1.28287	FBXO5
peptidyl-threonine phosphorylation (GO:0018107)	1/69	0.27792	0.40282	-0.995742	1.27497	ULK1
regulation of phosphatase activity (GO:0010921)	1/73	0.291447	0.408956	-1.02683	1.26598	PPP1R12A
positive regulation of gene expression (GO:0010628)	5/772	0.297368	0.410827	-1.04117	1.26272	SFR1;HGS;UPF3B;BRAF;SLC50A1
regulation of gene expression, epigenetic (GO:0040029)	1/75	0.298116	0.410827	-1.03618	1.25406	SLC50A1
retrograde transport, endosome to Golgi (GO:0042147)	1/83	0.324178	0.42308	-1.11322	1.25401	TBC1D10C
regulation of ubiquitin-protein ligase activity involved in mitotic cell cycle (GO:0051439)	1/73	0.291447	0.408956	-1.01585	1.25244	FBXO5
activation of GTPase activity (GO:0090630)	1/85	0.330542	0.423314	-1.10958	1.22832	TBC1D10C
endosomal transport (GO:0016197)	2/230	0.294236	0.409911	-0.992875	1.21466	HGS;TBC1D10C
positive regulation of translation (GO:0045727)	1/79	0.311269	0.41683	-1.03845	1.21197	UPF3B
cytoskeleton-dependent cytokinesis (GO:0061640)	1/71	0.284715	0.405983	-0.956218	1.20126	SON
Rho protein signal transduction (GO:0007266)	1/73	0.291447	0.408956	-0.969273	1.19501	ARHGEF1
regulation of cell cycle process (GO:0010564)	1/91	0.349281	0.436601	-1.13407	1.1929	FBXO5
regulation of protein catabolic process (GO:0042176)	1/92	0.352354	0.43672	-1.1421	1.19135	HGS
negative regulation of cell communication (GO:0010648)	1/79	0.311269	0.41683	-1.01978	1.19019	BRAF
positive regulation of binding (GO:0051099)	1/82	0.320973	0.42308	-1.04437	1.18682	CDT1
cellular response to lipopolysaccharide (GO:0071222)	1/92	0.352354	0.43672	-1.13582	1.1848	SBNO2
organelle assembly (GO:0070925)	3/377	0.261118	0.393273	-0.882313	1.18475	HGS;ULK1;PCNT
regulation of defense response (GO:0031347)	1/76	0.301428	0.41342	-0.987842	1.18464	SBNO2
mRNA splicing, via spliceosome (GO:0000398)	2/262	0.349422	0.436601	-1.11454	1.1719	UPF3B;WDR33
regulation of fat cell differentiation (GO:0045598)	1/73	0.291447	0.408956	-0.946163	1.16652	ASXL1
positive regulation of protein ubiquitination (GO:0031398)	1/84	0.327367	0.423314	-1.04449	1.16635	SENP2
DNA damage response, signal transduction by p53 class mediator (GO:0030330)	1/83	0.324178	0.42308	-1.03296	1.16359	CNOT6
regulation of cellular response to heat (GO:1900034)	1/79	0.311269	0.41683	-0.996003	1.16243	NUP214
peptidyl-threonine modification (GO:0018210)	1/90	0.346195	0.435216	-1.08896	1.15512	ULK1
regulation of cell cycle G2/M phase transition (GO:1902749)	1/85	0.330542	0.423314	-1.03572	1.14656	PCNT
protein modification process (GO:0036211)	1/85	0.330542	0.423314	-1.03512	1.1459	WDYHV1
positive regulation of T cell activation (GO:0050870)	1/69	0.27792	0.40282	-0.892873	1.14325	DOCK8
regulation of phosphatidylinositol 3-kinase signaling (GO:0014066)	1/81	0.317754	0.420035	-0.993742	1.1393	TSC2
cellular response to oxidative stress (GO:0034599)	1/116	0.421933	0.498869	-1.31591	1.13551	TXNRD1
regulation of mitotic nuclear division (GO:0007088)	1/85	0.330542	0.423314	-1.02379	1.13336	FBXO5
negative regulation of signaling (GO:0023057)	1/84	0.327367	0.423314	-1.01107	1.12904	BRAF
negative regulation of extrinsic apoptotic signaling pathway (GO:2001237)	1/77	0.304724	0.413458	-0.94532	1.12337	ARHGEF2
positive regulation of stress-activated MAPK cascade (GO:0032874)	1/81	0.317754	0.420035	-0.972812	1.11531	MAP4K2
negative regulation of kinase activity (GO:0033673)	1/92	0.352354	0.43672	-1.06192	1.10771	TSC2
epithelium development (GO:0060429)	1/116	0.421933	0.498869	-1.27918	1.10381	TIMELESS
organic substance transport (GO:0071702)	1/88	0.339978	0.430033	-1.01529	1.09537	SLC50A1
negative regulation of translation (GO:0017148)	1/89	0.343093	0.432199	-1.02001	1.09116	CNOT6
regulation of protein serine/threonine kinase activity (GO:0071900)	1/81	0.317754	0.420035	-0.95134	1.09069	HGS
response to ionizing radiation (GO:0010212)	1/78	0.308004	0.415165	-0.925247	1.08961	SPIDR
positive regulation of cellular protein metabolic process (GO:0032270)	1/92	0.352354	0.43672	-1.0343	1.0789	UPF3B
negative regulation of binding (GO:0051100)	1/83	0.324178	0.42308	-0.945345	1.0649	CPNE1
viral transcription (GO:0019083)	1/114	0.416429	0.494259	-1.2122	1.06194	NUP214
positive regulation of supramolecular fiber organization (GO:1902905)	1/85	0.330542	0.423314	-0.956858	1.05926	TOGARAM1
RNA splicing, via transesterification reactions with bulged adenosine as nucleophile (GO:0000377)	2/237	0.30639	0.414805	-0.891342	1.05436	UPF3B;WDR33
positive regulation of macromolecule metabolic process (GO:0010604)	2/277	0.374835	0.458132	-1.06413	1.0442	HGS;BRAF
cellular response to molecule of bacterial origin (GO:0071219)	1/85	0.330542	0.423314	-0.938602	1.03905	SBNO2
negative regulation of programmed cell death (GO:0043069)	3/409	0.302012	0.41342	-0.86238	1.03252	SON;BRAF;ARHGEF2
viral gene expression (GO:0019080)	1/111	0.408076	0.485279	-1.13764	1.01967	NUP214
viral life cycle (GO:0019058)	1/108	0.399604	0.481068	-1.07602	0.987013	NUP214
protein modification by small protein conjugation (GO:0032446)	3/399	0.289173	0.408956	-0.785897	0.975087	NUP214;HERC4;SENP2
response to tumor necrosis factor (GO:0034612)	1/98	0.370489	0.45372	-0.981853	0.974913	ARHGEF2
regulation of cell motility (GO:2000145)	1/110	0.405265	0.482869	-1.07286	0.969026	ADGRG3
proteolysis (GO:0006508)	2/292	0.399848	0.481068	-1.05134	0.963736	RNF123;CPNE1
nucleotide-excision repair (GO:0006289)	1/109	0.402441	0.482303	-1.05454	0.959851	GPS1
circulatory system development (GO:0072359)	1/110	0.405265	0.482869	-1.06254	0.959701	TSC2
cellular response to interferon-gamma (GO:0071346)	1/117	0.424666	0.50018	-1.11967	0.958943	IRF9
regulation of kinase activity (GO:0043549)	1/102	0.382299	0.464489	-0.996571	0.958256	RBL1
positive regulation of programmed cell death (GO:0043068)	2/258	0.342588	0.432199	-0.880216	0.942912	ARHGEF1;ARHGEF2
cell cycle G1/S phase transition (GO:0044843)	1/93	0.355412	0.439626	-0.908843	0.940178	CDT1
ciliary basal body-plasma membrane docking (GO:0097711)	1/97	0.367502	0.450958	-0.932534	0.933492	PCNT
regulation of cellular response to stress (GO:0080135)	1/105	0.391012	0.474141	-0.982988	0.923042	NUP214
regulation of protein ubiquitination (GO:0031396)	1/102	0.382299	0.464489	-0.953058	0.916416	SENP2
cytosolic transport (GO:0016482)	1/119	0.430093	0.503684	-1.06635	0.899735	TBC1D10C
regulation of programmed cell death (GO:0043067)	2/269	0.361327	0.445155	-0.868532	0.884141	MAP4K2;RBM25
positive regulation of apoptotic process (GO:0043065)	2/308	0.426017	0.500814	-1.02203	0.872072	ARHGEF1;ARHGEF2
negative regulation of gene expression (GO:0010629)	4/619	0.332051	0.424364	-0.780397	0.860362	SBNO2;RBL1;CPNE1;TIMELESS
negative regulation of protein kinase activity (GO:0006469)	1/110	0.405265	0.482869	-0.951237	0.859171	TSC2
regulation of mRNA stability (GO:0043488)	1/129	0.456479	0.52461	-1.09531	0.858956	NUP214
cilium assembly (GO:0060271)	2/289	0.394881	0.477891	-0.90635	0.842154	TOGARAM1;PCNT
regulation of response to external stimulus (GO:0032101)	1/108	0.399604	0.481068	-0.8868	0.813445	SBNO2
DNA replication (GO:0006260)	1/121	0.43547	0.507088	-0.974868	0.810436	TIMELESS
positive regulation of peptidyl-tyrosine phosphorylation (GO:0050731)	1/117	0.424666	0.50018	-0.938711	0.803961	ARHGEF2
macromolecular complex assembly (GO:0065003)	1/121	0.43547	0.507088	-0.964509	0.801825	FANCA
negative regulation of sequence-specific DNA binding transcription factor activity (GO:0043433)	1/141	0.486551	0.550947	-1.07329	0.773213	ADGRG3
protein dephosphorylation (GO:0006470)	1/126	0.448693	0.518564	-0.948692	0.760297	PPP1R12A
regulation of phosphorylation (GO:0042325)	1/120	0.432788	0.505877	-0.90538	0.758262	NUP214
dephosphorylation (GO:0016311)	1/125	0.446073	0.516506	-0.933196	0.753344	PPP1R12A
positive regulation of NF-kappaB transcription factor activity (GO:0051092)	1/129	0.456479	0.52461	-0.932198	0.731041	ARHGEF2
positive regulation of cellular biosynthetic process (GO:0031328)	1/160	0.530831	0.583914	-1.1353	0.718996	UPF3B
negative regulation of cell differentiation (GO:0045596)	1/151	0.510348	0.567463	-1.06806	0.718445	ASXL1
DNA metabolic process (GO:0006259)	2/315	0.437283	0.508238	-0.868027	0.71801	FANCA;TIMELESS
transcription from RNA polymerase II promoter (GO:0006366)	3/486	0.400854	0.481337	-0.777324	0.710597	UPF3B;IRF9;WDR33
positive regulation of intracellular protein transport (GO:0090316)	1/153	0.514975	0.570548	-1.06879	0.709288	PCNT
cellular response to cytokine stimulus (GO:0071345)	3/457	0.363817	0.447328	-0.700917	0.7087	SBNO2;DOCK8;ARHGEF2
protein phosphorylation (GO:0006468)	3/471	0.381753	0.464489	-0.733931	0.706762	MAP4K2;ULK1;BRAF
regulation of G2/M transition of mitotic cell cycle (GO:0010389)	1/150	0.508018	0.565894	-1.02651	0.695188	PCNT
plasma membrane bounded cell projection organization (GO:0120036)	1/119	0.430093	0.503684	-0.815937	0.688449	ULK1
transcription, DNA-templated (GO:0006351)	2/357	0.502265	0.564205	-0.992626	0.683549	PTMA;IRF9
heart development (GO:0007507)	1/150	0.508018	0.565894	-1.00509	0.680682	TSC2
organic anion transport (GO:0015711)	1/125	0.446073	0.516506	-0.834088	0.673337	SLC6A6
response to lipid (GO:0033993)	1/141	0.486551	0.550947	-0.925966	0.66708	ASXL1
negative regulation of cell proliferation (GO:0008285)	2/364	0.512629	0.568972	-0.994197	0.664325	HGS;TSC2
cellular response to organic cyclic compound (GO:0071407)	1/136	0.474226	0.541973	-0.876717	0.654093	SPIDR
response to lipopolysaccharide (GO:0032496)	1/156	0.521834	0.577109	-0.990442	0.644189	SBNO2
positive regulation of protein kinase B signaling (GO:0051897)	1/128	0.453896	0.523595	-0.815113	0.643847	CPNE1
negative regulation of canonical Wnt signaling pathway (GO:0090090)	1/149	0.505678	0.565331	-0.941217	0.641775	TMEM131L
cellular protein complex assembly (GO:0043623)	1/145	0.496204	0.55982	-0.892537	0.625461	TESPA1
peptide biosynthetic process (GO:0043043)	1/175	0.563102	0.610688	-1.08597	0.62367	RRBP1
regulation of protein kinase activity (GO:0045859)	1/148	0.503326	0.564205	-0.905886	0.621907	TSC2
peptidyl-serine phosphorylation (GO:0018105)	1/146	0.498589	0.561482	-0.892946	0.621467	ULK1
axon guidance (GO:0007411)	1/159	0.528598	0.582498	-0.948785	0.604877	SPTA1
cellular response to organic substance (GO:0071310)	1/134	0.469215	0.537242	-0.798581	0.604282	NDOR1
regulation of primary metabolic process (GO:0080090)	1/140	0.484109	0.550947	-0.831945	0.603531	TXNRD1
muscle contraction (GO:0006936)	1/138	0.479191	0.546632	-0.80444	0.591792	UTRN
protein autophosphorylation (GO:0046777)	1/176	0.565173	0.611857	-1.02651	0.585748	ULK1
ribonucleoprotein complex assembly (GO:0022618)	1/157	0.524099	0.578576	-0.888531	0.574057	YTHDC1
neuron projection morphogenesis (GO:0048812)	1/164	0.53966	0.591514	-0.928873	0.572943	CPNE1
positive regulation of hydrolase activity (GO:0051345)	1/173	0.558929	0.607232	-0.982123	0.571333	DOCK8
regulation of angiogenesis (GO:0045765)	1/178	0.569287	0.61523	-1.01235	0.570326	HGS
neuron development (GO:0048666)	1/145	0.496204	0.55982	-0.809124	0.567008	ULK1
regulation of cellular component organization (GO:0051128)	1/141	0.486551	0.550947	-0.75346	0.542804	TSC2
regulation of cell proliferation (GO:0042127)	4/741	0.461827	0.529768	-0.697432	0.538812	CNOT6;HGS;TSC2;ARHGEF2
post-translational protein modification (GO:0043687)	2/358	0.503754	0.564205	-0.750136	0.514343	GPS1;UBXN7
positive regulation of protein kinase activity (GO:0045860)	1/173	0.558929	0.607232	-0.878956	0.511317	MAP4K2
positive regulation of protein phosphorylation (GO:0001934)	2/413	0.581164	0.623688	-0.926099	0.502615	BRAF;ARHGEF2
protein homooligomerization (GO:0051260)	1/191	0.595105	0.637539	-0.956345	0.49636	DGKD
peptidyl-serine modification (GO:0018209)	1/171	0.554717	0.604789	-0.837888	0.493764	ULK1
ER to Golgi vesicle-mediated transport (GO:0006888)	1/181	0.575386	0.618565	-0.878972	0.48582	SPTA1
negative regulation of protein phosphorylation (GO:0001933)	1/179	0.57133	0.615278	-0.859738	0.481272	TSC2
neuron projection development (GO:0031175)	1/168	0.548325	0.59888	-0.783522	0.470808	ULK1
positive regulation of cytokine production (GO:0001819)	1/221	0.648987	0.679891	-1.08597	0.469513	ARHGEF2
positive regulation of cell migration (GO:0030335)	1/222	0.650655	0.680481	-1.03217	0.443604	ARHGEF2
cilium organization (GO:0044782)	1/193	0.598939	0.640532	-0.850537	0.435982	PCNT
apoptotic process (GO:0006915)	1/232	0.666911	0.693721	-1.07016	0.43352	TSC2
positive regulation of protein modification process (GO:0031401)	1/164	0.53966	0.591514	-0.699858	0.431684	RAB3GAP2
RNA processing (GO:0006396)	1/194	0.600842	0.641454	-0.838833	0.427321	SON
regulation of MAPK cascade (GO:0043408)	1/204	0.619391	0.656704	-0.88079	0.421915	HGS
cellular response to lipid (GO:0071396)	1/179	0.57133	0.615278	-0.74739	0.41838	SBNO2
protein oligomerization (GO:0051259)	1/218	0.643935	0.675747	-0.941295	0.414319	DGKD
cellular response to tumor necrosis factor (GO:0071356)	1/195	0.602737	0.642363	-0.796205	0.403098	ARHGEF2
plasma membrane bounded cell projection assembly (GO:0120031)	1/242	0.682419	0.705319	-1.04256	0.398375	PCNT
regulation of inflammatory response (GO:0050727)	1/167	0.546174	0.59759	-0.650584	0.393485	SBNO2
regulation of I-kappaB kinase/NF-kappaB signaling (GO:0043122)	1/205	0.621198	0.657232	-0.814553	0.387813	CPNE1
positive regulation of ERK1 and ERK2 cascade (GO:0070374)	1/202	0.615751	0.655099	-0.796639	0.386301	BRAF
positive regulation of sequence-specific DNA binding transcription factor activity (GO:0051091)	1/216	0.640527	0.673318	-0.837973	0.373287	ARHGEF2
regulation of canonical Wnt signaling pathway (GO:0060828)	1/214	0.637087	0.670847	-0.818413	0.368981	TMEM131L
regulation of autophagy (GO:0010506)	1/204	0.619391	0.656704	-0.765109	0.366501	ULK1
Ras protein signal transduction (GO:0007265)	1/224	0.653968	0.682787	-0.847474	0.35992	ARHGEF1
positive regulation of signal transduction (GO:0009967)	1/207	0.624787	0.659022	-0.749122	0.352345	ASXL1
translation (GO:0006412)	1/233	0.668495	0.693721	-0.82112	0.330686	RRBP1
endocytosis (GO:0006897)	1/264	0.714066	0.731888	-0.98043	0.330189	TSC2
negative regulation of nucleic acid-templated transcription (GO:1903507)	2/445	0.622023	0.657232	-0.684528	0.324999	SBNO2;TIMELESS
activation of protein kinase activity (GO:0032147)	1/234	0.670072	0.693721	-0.7824	0.31325	MAP4K2
cellular protein metabolic process (GO:0044267)	2/485	0.668749	0.693721	-0.687007	0.276415	RRBP1;WDYHV1
positive regulation of cellular process (GO:0048522)	2/520	0.705761	0.724581	-0.767522	0.267465	CNOT6;SMC5
negative regulation of cellular process (GO:0048523)	2/535	0.720553	0.73731	-0.78491	0.257243	HGS;TSC2
Golgi vesicle transport (GO:0048193)	1/272	0.724783	0.740409	-0.792414	0.255065	SPTA1
negative regulation of apoptotic process (GO:0043066)	2/486	0.669856	0.693721	-0.621434	0.249005	SON;BRAF
cellular response to oxygen-containing compound (GO:1901701)	1/275	0.728699	0.743176	-0.745494	0.235945	SBNO2
regulation of ERK1 and ERK2 cascade (GO:0070372)	1/248	0.691379	0.713382	-0.633754	0.233898	BRAF
regulation of transcription from RNA polymerase II promoter (GO:0006357)	6/1479	0.703344	0.723305	-0.651874	0.229401	ASXL1;SBNO2;RBL1;PPP1R12A;ARHGEF2;ATAD2B
regulation of nucleic acid-templated transcription (GO:1903506)	2/608	0.783943	0.794258	-0.931682	0.226789	SBNO2;DENND4A
negative regulation of cellular macromolecule biosynthetic process (GO:2000113)	2/513	0.698641	0.71967	-0.614268	0.220288	SBNO2;TIMELESS
regulation of transcription, DNA-templated (GO:0006355)	6/1599	0.772239	0.784982	-0.754282	0.194953	CDT1;SBNO2;SFR1;DENND4A;TIMELESS;FBXO5
positive regulation of MAPK cascade (GO:0043410)	1/290	0.747465	0.761055	-0.658243	0.191594	BRAF
regulation of cell migration (GO:0030334)	1/317	0.778064	0.7896	-0.705536	0.177052	ADGRG3
regulation of cellular macromolecule biosynthetic process (GO:2000112)	2/632	0.80188	0.811097	-0.668788	0.147666	SBNO2;DENND4A
transmembrane receptor protein tyrosine kinase signaling pathway (GO:0007169)	1/397	0.848793	0.857142	-0.830181	0.136099	TSC2
positive regulation of cell proliferation (GO:0008284)	1/425	0.867846	0.874948	-0.777235	0.110166	CNOT6
positive regulation of nucleic acid-templated transcription (GO:1903508)	1/503	0.909281	0.912243	-0.852444	0.081068	SFR1
negative regulation of transcription, DNA-templated (GO:0045892)	2/814	0.90016	0.904566	-0.741616	0.0780049	SBNO2;TIMELESS
positive regulation of intracellular signal transduction (GO:1902533)	1/480	0.898623	0.904496	-0.712267	0.0761358	CPNE1
protein ubiquitination (GO:0016567)	1/507	0.911018	0.9125	-0.630974	0.0588018	HERC4
cytokine-mediated signaling pathway (GO:0019221)	1/634	0.951936	0.951936	-0.780288	0.0384347	IRF9

## Sheet: MAJIQ Cortex (Adar1 KO)
Term	Overlap	P-value	Adjusted P-value	Z-score	Combined Score	Genes
response to interleukin-6 (GO:0070741)	2/13	0.00365827	0.393648	-2.63143	14.7643	SELPLG;PTGIS
negative regulation of mRNA splicing, via spliceosome (GO:0048025)	2/14	0.00424833	0.393648	-2.34296	12.7955	SRSF6;SRSF7
polyamine metabolic process (GO:0006595)	2/13	0.00365827	0.393648	-2.22562	12.4875	SAT1;OAZ1
regulation of keratinocyte proliferation (GO:0010837)	2/19	0.00780126	0.393648	-2.39108	11.605	PTPRK;SRSF6
negative regulation of cell cycle (GO:0045786)	4/73	0.00176786	0.393648	-1.70667	10.8169	ZBTB17;HTRA2;PTPRK;INHA
negative regulation of keratinocyte differentiation (GO:0045617)	1/7	0.0483255	0.393648	-3.55406	10.7681	SRSF6
negative regulation of epidermal cell differentiation (GO:0045605)	1/8	0.0550372	0.393648	-3.70393	10.7405	SRSF6
mRNA splice site selection (GO:0006376)	2/25	0.0133143	0.393648	-2.46661	10.6531	PRPF39;SRSF6
negative regulation of lymphocyte differentiation (GO:0045620)	1/7	0.0483255	0.393648	-3.39934	10.2993	INHA
establishment of mitochondrion localization, microtubule-mediated (GO:0034643)	1/7	0.0483255	0.393648	-3.39818	10.2958	RHOT2
type I interferon signaling pathway (GO:0060337)	3/66	0.0113564	0.393648	-2.29693	10.2856	IRF3;IRAK1;IP6K2
regulation of thymocyte apoptotic process (GO:0070243)	1/7	0.0483255	0.393648	-3.35403	10.162	ZC3H8
retinal ganglion cell axon guidance (GO:0031290)	1/7	0.0483255	0.393648	-3.33924	10.1172	PTPRM
negative regulation of lymphocyte migration (GO:2000402)	1/7	0.0483255	0.393648	-3.3334	10.0995	LRCH1
mitochondrial RNA metabolic process (GO:0000959)	2/21	0.00949276	0.393648	-2.1607	10.0629	ELAC2;POLRMT
protein deacylation (GO:0035601)	2/17	0.00626192	0.393648	-1.95368	9.91154	HDAC5;HDAC10
negative regulation of RNA splicing (GO:0033119)	2/19	0.00780126	0.393648	-2.01327	9.77133	SRSF6;SRSF7
ion homeostasis (GO:0050801)	1/8	0.0550372	0.393648	-3.36695	9.7633	WNK4
establishment of endothelial intestinal barrier (GO:0090557)	1/7	0.0483255	0.393648	-3.19112	9.66843	TJP2
negative regulation of T cell differentiation in thymus (GO:0033085)	1/7	0.0483255	0.393648	-3.18459	9.64864	ZC3H8
positive regulation of transcription from RNA polymerase II promoter in response to heat stress (GO:0061408)	1/7	0.0483255	0.393648	-3.17191	9.61023	HSF1
cellular response to chemokine (GO:1990869)	1/7	0.0483255	0.393648	-3.16931	9.60235	LRCH1
regulation of response to wounding (GO:1903034)	1/7	0.0483255	0.393648	-3.14739	9.53596	SRSF6
negative regulation of keratinocyte proliferation (GO:0010839)	1/8	0.0550372	0.393648	-3.28567	9.5276	PTPRK
protein homotrimerization (GO:0070207)	2/23	0.0113319	0.393648	-2.10863	9.44695	HSF1;HTRA2
tRNA 3'-end processing (GO:0042780)	1/8	0.0550372	0.393648	-3.17746	9.21382	ELAC2
mRNA 5'-splice site recognition (GO:0000395)	1/7	0.0483255	0.393648	-2.98536	9.04504	PRPF39
intrinsic apoptotic signaling pathway in response to DNA damage by p53 class mediator (GO:0042771)	2/21	0.00949276	0.393648	-1.9363	9.01778	BAG6;USP28
negative regulation of nitric oxide metabolic process (GO:1904406)	1/8	0.0550372	0.393648	-3.09303	8.96901	PTGIS
cellular response to interleukin-6 (GO:0071354)	2/24	0.0123055	0.393648	-2.00042	8.79728	SELPLG;PTGIS
positive regulation of smooth muscle cell migration (GO:0014911)	1/11	0.0748914	0.393648	-3.38847	8.78196	DOCK4
transmembrane receptor protein tyrosine phosphatase signaling pathway (GO:0007185)	1/7	0.0483255	0.393648	-2.8947	8.77035	PTPRF
polyamine biosynthetic process (GO:0006596)	1/7	0.0483255	0.393648	-2.86783	8.68893	SAT1
positive regulation of mitochondrial membrane permeability involved in apoptotic process (GO:1902110)	1/9	0.0617018	0.393648	-3.11916	8.68825	RHOT2
protein autoprocessing (GO:0016540)	1/10	0.0683198	0.393648	-3.1987	8.5839	HTRA2
negative regulation of mRNA processing (GO:0050686)	2/16	0.00555074	0.393648	-1.62805	8.45583	SRSF6;SRSF7
spermine metabolic process (GO:0008215)	1/7	0.0483255	0.393648	-2.78414	8.43539	SAT1
regulation of autophagy of mitochondrion (GO:1903146)	2/28	0.0165469	0.393648	-2.03368	8.34126	ZBTB17;HTRA2
response to chemokine (GO:1990868)	1/7	0.0483255	0.393648	-2.73362	8.28232	LRCH1
muscle tissue development (GO:0060537)	1/7	0.0483255	0.393648	-2.68357	8.13066	SRPK3
snRNA transcription from RNA polymerase III promoter (GO:0042796)	1/7	0.0483255	0.393648	-2.6593	8.05712	ZC3H8
intrinsic apoptotic signaling pathway in response to DNA damage (GO:0008630)	3/49	0.0049864	0.393648	-1.51866	8.0505	BAG6;HTRA2;USP28
regulation of mitochondrion organization (GO:0010821)	3/49	0.0049864	0.393648	-1.51794	8.04664	ZBTB17;RHOT2;HTRA2
ribosomal large subunit assembly (GO:0000027)	2/31	0.0200779	0.393648	-2.05531	8.03245	RPL10;NLE1
regulation of protein heterodimerization activity (GO:0043497)	1/8	0.0550372	0.393648	-2.7597	8.00244	HSF1
positive regulation of execution phase of apoptosis (GO:1900119)	1/11	0.0748914	0.393648	-3.05528	7.91842	PTGIS
protein dephosphorylation (GO:0006470)	5/126	0.00200184	0.393648	-1.26657	7.87007	PPP1CC;PPM1A;PTPRM;PTPRK;PTPRF
inositol phosphate metabolic process (GO:0043647)	2/48	0.0450806	0.393648	-2.5344	7.85488	PLCB3;IP6K2
regulation of striated muscle cell differentiation (GO:0051153)	1/9	0.0617018	0.393648	-2.81226	7.83338	HDAC5
coenzyme A biosynthetic process (GO:0015937)	1/8	0.0550372	0.393648	-2.6661	7.73101	PPCDC
tRNA methylation (GO:0030488)	2/27	0.0154355	0.393648	-1.84581	7.69901	TRMT5;THUMPD3
cellular biogenic amine metabolic process (GO:0006576)	1/11	0.0748914	0.393648	-2.95609	7.66134	OAZ1
positive regulation of mRNA 3'-end processing (GO:0031442)	1/9	0.0617018	0.393648	-2.74183	7.6372	HSF1
positive regulation of DNA recombination (GO:0045911)	1/9	0.0617018	0.393648	-2.71005	7.5487	MMS19
protein deacetylation (GO:0006476)	2/33	0.0225907	0.393648	-1.97213	7.47479	HDAC5;HDAC10
protein maturation (GO:0051604)	3/84	0.0215848	0.393648	-1.94531	7.46176	TSPAN14;MMS19;RHBDL3
regulation of ERAD pathway (GO:1904292)	1/9	0.0617018	0.393648	-2.66087	7.41171	BAG6
dynamin family protein polymerization involved in membrane fission (GO:0003373)	1/10	0.0683198	0.393648	-2.73446	7.33807	DNM1
response to dopamine (GO:1903350)	1/10	0.0683198	0.393648	-2.68284	7.19956	GABPA
protein maturation by iron-sulfur cluster transfer (GO:0097428)	1/8	0.0550372	0.393648	-2.46181	7.13863	MMS19
tRNA aminoacylation for mitochondrial protein translation (GO:0070127)	1/9	0.0617018	0.393648	-2.55083	7.10518	TARS2
cellular macromolecule catabolic process (GO:0044265)	2/49	0.0467867	0.393648	-2.30638	7.06251	RNASEH2A;HTRA2
regulation of microtubule-based movement (GO:0060632)	1/10	0.0683198	0.393648	-2.62979	7.05718	CCDC65
regulation of vascular associated smooth muscle cell migration (GO:1904752)	1/9	0.0617018	0.393648	-2.52549	7.03461	DOCK4
cellular response to heat (GO:0034605)	2/48	0.0450806	0.393648	-2.26138	7.0087	HSF1;HTRA2
dynamin family protein polymerization involved in mitochondrial fission (GO:0003374)	1/10	0.0683198	0.393648	-2.61139	7.0078	DNM1
cellular response to dopamine (GO:1903351)	1/10	0.0683198	0.393648	-2.60304	6.9854	GABPA
spermidine metabolic process (GO:0008216)	1/8	0.0550372	0.393648	-2.40325	6.9688	SAT1
mitochondrial RNA processing (GO:0000963)	1/7	0.0483255	0.393648	-2.28712	6.92951	ELAC2
regulation of peroxisome proliferator activated receptor signaling pathway (GO:0035358)	1/9	0.0617018	0.393648	-2.47624	6.89741	PTGIS
detection of mechanical stimulus involved in sensory perception (GO:0050974)	1/10	0.0683198	0.393648	-2.55583	6.85871	KCNK4
negative regulation of T cell differentiation (GO:0045581)	1/12	0.081417	0.393648	-2.72605	6.8374	ZC3H8
regulation of cysteine-type endopeptidase activity involved in apoptotic signaling pathway (GO:2001267)	1/10	0.0683198	0.393648	-2.54551	6.83102	HTRA2
oogenesis (GO:0048477)	1/10	0.0683198	0.393648	-2.52326	6.7713	FMN2
translational readthrough (GO:0006451)	1/8	0.0550372	0.393648	-2.30211	6.67555	TRNAU1AP
internal protein amino acid acetylation (GO:0006475)	1/12	0.081417	0.393648	-2.61046	6.54747	BAG6
very-low-density lipoprotein particle assembly (GO:0034379)	1/11	0.0748914	0.393648	-2.50592	6.49464	DGAT1
selenocysteine incorporation (GO:0001514)	1/8	0.0550372	0.393648	-2.23926	6.4933	TRNAU1AP
protein trimerization (GO:0070206)	2/33	0.0225907	0.393648	-1.70767	6.47242	HSF1;HTRA2
ribonucleoside bisphosphate biosynthetic process (GO:0034030)	1/8	0.0550372	0.393648	-2.22755	6.45934	PPCDC
regulation of T cell differentiation in thymus (GO:0033081)	1/13	0.0878969	0.393648	-2.64874	6.44066	ZC3H8
positive regulation of T cell apoptotic process (GO:0070234)	1/11	0.0748914	0.393648	-2.48035	6.42837	ZC3H8
T cell homeostasis (GO:0043029)	1/11	0.0748914	0.393648	-2.47701	6.41971	ZC3H8
isoprenoid metabolic process (GO:0006720)	1/9	0.0617018	0.393648	-2.29678	6.39754	GGPS1
DNA damage induced protein phosphorylation (GO:0006975)	1/9	0.0617018	0.393648	-2.28327	6.35992	MAPK12
regulation of receptor binding (GO:1900120)	1/9	0.0617018	0.393648	-2.27675	6.34176	PTPRF
coenzyme A metabolic process (GO:0015936)	1/11	0.0748914	0.393648	-2.44491	6.33652	PPCDC
cellular response to DNA damage stimulus (GO:0006974)	7/330	0.00900928	0.393648	-1.33891	6.30561	IRF3;HTRA2;MMS19;FMN2;USP28;FANCG;MAPK12
positive regulation of mesenchymal cell proliferation (GO:0002053)	1/12	0.081417	0.393648	-2.50647	6.28666	CHRD
positive regulation of transcription from RNA polymerase III promoter (GO:0045945)	1/11	0.0748914	0.393648	-2.40916	6.24387	ZC3H8
metallo-sulfur cluster assembly (GO:0031163)	1/15	0.100721	0.393648	-2.71879	6.24071	MMS19
positive regulation of ion transmembrane transport (GO:0034767)	1/10	0.0683198	0.393648	-2.32192	6.23101	WNK4
negative regulation of autophagy (GO:0010507)	2/47	0.0433983	0.393648	-1.97566	6.19831	NRBP2;RASIP1
cellular response to type I interferon (GO:0071357)	3/66	0.0113564	0.393648	-1.38204	6.18876	IRF3;IRAK1;IP6K2
cellular response to arsenic-containing substance (GO:0071243)	1/13	0.0878969	0.393648	-2.54461	6.18745	HSF1
histone deacetylation (GO:0016575)	2/37	0.02798	0.393648	-1.7251	6.1694	HDAC5;HDAC10
nuclear-transcribed mRNA catabolic process, nonsense-mediated decay (GO:0000184)	3/113	0.0458448	0.393648	-1.94313	5.9897	RPL10;RPL22;PYM1
regulation of mesenchymal cell proliferation (GO:0010464)	1/13	0.0878969	0.393648	-2.45832	5.97763	CHRD
male meiosis I (GO:0007141)	1/11	0.0748914	0.393648	-2.29104	5.93771	SYCP3
mitochondrion organization (GO:0007005)	5/168	0.0068116	0.393648	-1.18737	5.92396	RHOT2;POLRMT;DNM1;FANCG;GABPA
cofactor biosynthetic process (GO:0051188)	2/32	0.0213187	0.393648	-1.53789	5.91807	MMS19;PPCDC
mitochondrial outer membrane permeabilization (GO:0097345)	1/13	0.0878969	0.393648	-2.39733	5.82933	RHOT2
endonucleolytic cleavage of tricistronic rRNA transcript (SSU-rRNA, 5.8S rRNA, LSU-rRNA) (GO:0000479)	1/12	0.081417	0.393648	-2.31378	5.80335	TSR1
mRNA-containing ribonucleoprotein complex export from nucleus (GO:0071427)	3/101	0.0346531	0.393648	-1.70424	5.73028	EIF5A;SRSF6;SRSF7
negative regulation of myotube differentiation (GO:0010832)	1/12	0.081417	0.393648	-2.28282	5.72571	HDAC5
alternative mRNA splicing, via spliceosome (GO:0000380)	1/13	0.0878969	0.393648	-2.35201	5.71913	SRSF6
dephosphorylation (GO:0016311)	4/125	0.0118934	0.393648	-1.28494	5.69457	PPP1CC;PPM1A;PTPRM;PTPRK
regulation of execution phase of apoptosis (GO:1900117)	1/14	0.0943315	0.393648	-2.40109	5.66884	PTGIS
intestinal absorption (GO:0050892)	1/14	0.0943315	0.393648	-2.39391	5.65189	TJP2
regulation of synaptic transmission, GABAergic (GO:0032228)	1/12	0.081417	0.393648	-2.25306	5.65105	NPAS4
cyclooxygenase pathway (GO:0019371)	1/12	0.081417	0.393648	-2.25239	5.64939	PTGIS
cellular response to interferon-beta (GO:0035458)	1/12	0.081417	0.393648	-2.24659	5.63484	HTRA2
synaptonemal complex assembly (GO:0007130)	1/12	0.081417	0.393648	-2.2177	5.56237	BAG6
positive regulation of peptidase activity (GO:0010952)	1/13	0.0878969	0.393648	-2.27234	5.52539	MAPK12
sensory perception (GO:0007600)	2/55	0.057501	0.393648	-1.93016	5.51246	NTSR2;KCNK4
hydrogen peroxide catabolic process (GO:0042744)	1/15	0.100721	0.393648	-2.39095	5.48819	PXDN
renal absorption (GO:0070293)	1/14	0.0943315	0.393648	-2.30733	5.44746	WNK4
negative regulation of reactive oxygen species biosynthetic process (GO:1903427)	1/14	0.0943315	0.393648	-2.28347	5.39113	PTGIS
regulation of mRNA polyadenylation (GO:1900363)	1/12	0.081417	0.393648	-2.14193	5.37232	HSF1
mitochondrion transport along microtubule (GO:0047497)	1/13	0.0878969	0.393648	-2.20566	5.36325	RHOT2
N-terminal protein amino acid acetylation (GO:0006474)	1/16	0.107066	0.393648	-2.38025	5.31823	NAA40
regulation of DNA-templated transcription in response to stress (GO:0043620)	1/14	0.0943315	0.393648	-2.23866	5.28533	HSF1
positive regulation of ERAD pathway (GO:1904294)	1/14	0.0943315	0.393648	-2.22964	5.26404	BAG6
regulation of cilium movement (GO:0003352)	1/9	0.0617018	0.393648	-1.88728	5.25691	CCDC65
iron-sulfur cluster assembly (GO:0016226)	1/19	0.125834	0.393648	-2.5356	5.25577	MMS19
negative regulation of epidermal growth factor-activated receptor activity (GO:0007175)	1/14	0.0943315	0.393648	-2.2254	5.25405	ZGPAT
synaptonemal complex organization (GO:0070193)	1/12	0.081417	0.393648	-2.08416	5.22742	BAG6
microtubule cytoskeleton organization involved in mitosis (GO:1902850)	2/45	0.0401068	0.393648	-1.62469	5.22535	CEP126;AURKA
cellular macromolecule biosynthetic process (GO:0034645)	6/368	0.0463813	0.393648	-1.69709	5.21153	RNASEH2A;RPL10;RPL22;NAP1L1;MMS19;INHA
establishment of chromosome localization (GO:0051303)	1/14	0.0943315	0.393648	-2.2064	5.20919	KIF22
neurotransmitter receptor internalization (GO:0099590)	1/11	0.0748914	0.393648	-1.99432	5.16872	DNM1
regulation of cell cycle (GO:0051726)	5/216	0.0185977	0.393648	-1.29569	5.16295	ZBTB17;MAP4K2;HTRA2;PTPRK;INHA
cellular response to nitrogen compound (GO:1901699)	1/15	0.100721	0.393648	-2.22238	5.10126	HSF1
prostanoid biosynthetic process (GO:0046457)	1/14	0.0943315	0.393648	-2.16011	5.0999	PTGIS
negative regulation of nitric oxide biosynthetic process (GO:0045019)	1/8	0.0550372	0.393648	-1.74225	5.05207	PTGIS
acylglycerol acyl-chain remodeling (GO:0036155)	1/9	0.0617018	0.393648	-1.80781	5.03555	DGAT1
interstrand cross-link repair (GO:0036297)	2/49	0.0467867	0.393648	-1.64388	5.03382	FANCI;FANCG
regulation of interferon-gamma biosynthetic process (GO:0045072)	1/15	0.100721	0.393648	-2.18905	5.02475	INHA
diacylglycerol metabolic process (GO:0046339)	1/14	0.0943315	0.393648	-2.1224	5.01087	DGAT1
N-terminal protein amino acid modification (GO:0031365)	1/18	0.119622	0.393648	-2.3555	5.00171	NAA40
intrinsic apoptotic signaling pathway by p53 class mediator (GO:0072332)	2/44	0.0384985	0.393648	-1.51714	4.94153	BAG6;USP28
keratan sulfate catabolic process (GO:0042340)	1/13	0.0878969	0.393648	-2.02376	4.92095	GALNS
long-term memory (GO:0007616)	1/18	0.119622	0.393648	-2.31652	4.91895	NPAS4
peptidyl-lysine acetylation (GO:0018394)	1/9	0.0617018	0.393648	-1.76317	4.91121	BAG6
regulation of double-strand break repair via nonhomologous end joining (GO:2001032)	1/13	0.0878969	0.393648	-2.01645	4.90318	HSF1
DNA methylation (GO:0006306)	1/19	0.125834	0.393648	-2.35529	4.88203	EHMT2
regulation of B cell differentiation (GO:0045577)	1/16	0.107066	0.393648	-2.18138	4.87389	INHA
mitochondrial tRNA modification (GO:0070900)	1/9	0.0617018	0.393648	-1.74529	4.86141	TRMT5
spliceosomal complex assembly (GO:0000245)	2/42	0.0353589	0.393648	-1.45315	4.85672	SRPK3;SRSF6
ER-associated misfolded protein catabolic process (GO:0071712)	1/14	0.0943315	0.393648	-2.05172	4.84399	BAG6
positive regulation of type I interferon production (GO:0032481)	2/63	0.0729504	0.393648	-1.84789	4.83773	IRF3;IRAK1
regulation of mRNA metabolic process (GO:1903311)	1/16	0.107066	0.393648	-2.16172	4.82996	SRPK3
DNA methylation or demethylation (GO:0044728)	1/17	0.113366	0.393648	-2.21751	4.82782	EHMT2
ribosome assembly (GO:0042255)	2/57	0.0612447	0.393648	-1.72539	4.81881	RPL10;NLE1
negative regulation of interleukin-2 production (GO:0032703)	1/16	0.107066	0.393648	-2.14653	4.79603	NAV3
purine nucleoside bisphosphate biosynthetic process (GO:0034033)	1/8	0.0550372	0.393648	-1.64591	4.77271	PPCDC
response to fatty acid (GO:0070542)	1/14	0.0943315	0.393648	-2.01504	4.75739	KCNK4
toll-like receptor 4 signaling pathway (GO:0034142)	1/16	0.107066	0.393648	-2.11887	4.73422	IRAK1
immune response-regulating cell surface receptor signaling pathway (GO:0002768)	1/12	0.081417	0.393648	-1.88479	4.72739	BAG6
transmembrane receptor protein serine/threonine kinase signaling pathway (GO:0007178)	3/145	0.0831137	0.393648	-1.8963	4.71713	IRAK1;PTPRK;INHA
negative regulation of receptor binding (GO:1900121)	1/12	0.081417	0.393648	-1.87599	4.70531	PTPRF
nuclear export (GO:0051168)	3/93	0.0280913	0.393648	-1.3144	4.69543	EIF5A;SRSF6;SRSF7
DNA alkylation (GO:0006305)	1/17	0.113366	0.393648	-2.15315	4.6877	EHMT2
peptidyl-lysine dimethylation (GO:0018027)	1/11	0.0748914	0.393648	-1.80865	4.6875	EHMT2
regulation of macrophage differentiation (GO:0045649)	1/14	0.0943315	0.393648	-1.98134	4.67782	INHA
negative regulation of cell migration involved in sprouting angiogenesis (GO:0090051)	1/15	0.100721	0.393648	-2.03666	4.67496	HDAC5
polyol metabolic process (GO:0019751)	2/48	0.0450806	0.393648	-1.50092	4.6518	PLCB3;IP6K2
regulation of protein binding (GO:0043393)	3/112	0.0448514	0.393648	-1.4926	4.63364	HDAC5;HSF1;AURKA
regulation of systemic arterial blood pressure (GO:0003073)	1/13	0.0878969	0.393648	-1.89946	4.6187	PLCB3
toll-like receptor 9 signaling pathway (GO:0034162)	1/14	0.0943315	0.393648	-1.95521	4.61613	IRAK1
cytoplasmic translation (GO:0002181)	2/55	0.057501	0.393648	-1.61215	4.60421	MRPL2;RPL22
actin filament polymerization (GO:0030041)	1/19	0.125834	0.393648	-2.20905	4.5789	WASF3
regulation of mRNA splicing, via spliceosome (GO:0048024)	2/61	0.0689724	0.393648	-1.70839	4.56832	SRSF6;SRSF7
stabilization of membrane potential (GO:0030322)	1/17	0.113366	0.393648	-2.08573	4.54092	KCNK4
positive regulation of cysteine-type endopeptidase activity involved in apoptotic signaling pathway (GO:2001269)	1/16	0.107066	0.393648	-2.02536	4.5253	HTRA2
lipopolysaccharide-mediated signaling pathway (GO:0031663)	1/17	0.113366	0.393648	-2.07572	4.51913	IRAK1
ribonucleoprotein complex assembly (GO:0022618)	4/157	0.0252002	0.393648	-1.22511	4.5095	SRPK3;RPL10;SRSF6;NLE1
cellular response to UV (GO:0034644)	2/68	0.0832056	0.393648	-1.8132	4.50842	PTPRK;USP28
negative regulation of NF-kappaB import into nucleus (GO:0042347)	1/17	0.113366	0.393648	-2.06437	4.49441	PPM1A
leukocyte tethering or rolling (GO:0050901)	1/17	0.113366	0.393648	-2.05733	4.47908	SELPLG
filopodium assembly (GO:0046847)	1/16	0.107066	0.393648	-1.99749	4.46302	FGD2
activation of NF-kappaB-inducing kinase activity (GO:0007250)	1/17	0.113366	0.393648	-2.04409	4.45025	IRAK1
cellular response to pH (GO:0071467)	1/17	0.113366	0.393648	-2.04272	4.44728	KCNK4
gene expression (GO:0010467)	7/412	0.0269821	0.393648	-1.23098	4.44703	EIF5A;TSPAN14;RPL10;RPL22;MMS19;SRSF6;SRSF7
peptidyl-threonine dephosphorylation (GO:0035970)	1/17	0.113366	0.393648	-2.03993	4.44121	PPM1A
regulation of intracellular signal transduction (GO:1902531)	6/423	0.0792652	0.393648	-1.74925	4.43426	RHOT2;EHMT2;PPP2R5C;INHA;AURKA;FGD2
mitochondrial gene expression (GO:0140053)	2/46	0.0417402	0.393648	-1.39497	4.43083	MRPL2;POLRMT
positive regulation of response to endoplasmic reticulum stress (GO:1905898)	1/17	0.113366	0.393648	-2.0335	4.42721	BAG6
immune response-activating cell surface receptor signaling pathway (GO:0002429)	1/21	0.138128	0.393648	-2.23051	4.41546	BAG6
positive regulation of transporter activity (GO:0032411)	1/15	0.100721	0.393648	-1.88868	4.33527	WNK4
photoperiodism (GO:0009648)	1/22	0.144211	0.393648	-2.23389	4.32588	PPP1CC
regulation of interferon-alpha production (GO:0032647)	1/17	0.113366	0.393648	-1.98391	4.31924	IRF3
fatty-acyl-CoA metabolic process (GO:0035337)	1/20	0.132003	0.393648	-2.12147	4.29582	DGAT1
NAD biosynthesis via nicotinamide riboside salvage pathway (GO:0034356)	1/16	0.107066	0.393648	-1.90342	4.25284	PTGIS
histone modification (GO:0016570)	3/99	0.0329444	0.393648	-1.23908	4.2289	HDAC5;HDAC10;EHMT2
positive regulation of mitotic cell cycle (GO:0045931)	2/53	0.0538413	0.393648	-1.44538	4.22299	HSF1;AURKA
negative regulation of cell motility (GO:2000146)	3/98	0.0321071	0.393648	-1.21916	4.19231	NAV3;CHRD;PTPRK
mRNA transcription (GO:0009299)	1/22	0.144211	0.393648	-2.15875	4.18038	HSF1
regulation of organelle organization (GO:0033043)	3/114	0.0468491	0.393648	-1.36378	4.17429	RHOT2;TBC1D10C;RUNDC1
leukocyte adhesion to vascular endothelial cell (GO:0061756)	1/17	0.113366	0.393648	-1.90897	4.15609	SELPLG
peptidyl-lysine methylation (GO:0018022)	1/17	0.113366	0.393648	-1.89844	4.13316	EHMT2
cellular biogenic amine biosynthetic process (GO:0042401)	1/16	0.107066	0.393648	-1.83529	4.10061	SAT1
cellular response to light stimulus (GO:0071482)	2/67	0.0811205	0.393648	-1.62659	4.0857	PTPRK;USP28
negative regulation of microtubule depolymerization (GO:0007026)	1/19	0.125834	0.393648	-1.97004	4.08348	NAV3
glial cell development (GO:0021782)	1/21	0.138128	0.393648	-2.05476	4.06755	MXRA8
transcription from mitochondrial promoter (GO:0006390)	1/13	0.0878969	0.393648	-1.66933	4.05912	POLRMT
regulation of peptidase activity (GO:0052547)	1/19	0.125834	0.393648	-1.94535	4.0323	MAPK12
cellular response to gamma radiation (GO:0071480)	1/18	0.119622	0.393648	-1.88871	4.01053	HSF1
entrainment of circadian clock by photoperiod (GO:0043153)	1/21	0.138128	0.393648	-2.01248	3.98384	PPP1CC
focal adhesion assembly (GO:0048041)	1/19	0.125834	0.393648	-1.9187	3.97707	PTPRK
positive regulation of dendrite extension (GO:1903861)	1/18	0.119622	0.393648	-1.87106	3.97304	ITSN2
myoblast differentiation (GO:0045445)	1/17	0.113366	0.393648	-1.81206	3.94509	MAPK12
negative regulation of double-strand break repair (GO:2000780)	1/20	0.132003	0.393648	-1.9456	3.93971	HSF1
cell-substrate adherens junction assembly (GO:0007045)	1/19	0.125834	0.393648	-1.89591	3.92982	PTPRK
histone H2A acetylation (GO:0043968)	1/17	0.113366	0.393648	-1.79411	3.90602	NAA40
regulation of vesicle fusion (GO:0031338)	2/62	0.0709522	0.393648	-1.47259	3.8961	TBC1D10C;RUNDC1
acylglycerol biosynthetic process (GO:0046463)	1/20	0.132003	0.393648	-1.92323	3.8944	DGAT1
cellular response to fatty acid (GO:0071398)	1/13	0.0878969	0.393648	-1.59307	3.8737	KCNK4
mRNA transport (GO:0051028)	3/105	0.0382056	0.393648	-1.18586	3.87155	EIF5A;SRSF6;SRSF7
positive regulation of interferon-alpha production (GO:0032727)	1/20	0.132003	0.393648	-1.90618	3.85988	IRF3
mRNA export from nucleus (GO:0006406)	3/106	0.0391218	0.393648	-1.19	3.85689	EIF5A;SRSF6;SRSF7
negative regulation of B cell activation (GO:0050869)	1/18	0.119622	0.393648	-1.81132	3.84619	INHA
negative regulation of striated muscle cell differentiation (GO:0051154)	1/17	0.113366	0.393648	-1.76546	3.84364	HDAC5
negative regulation of phosphate metabolic process (GO:0045936)	1/20	0.132003	0.393648	-1.89138	3.82992	INHA
regulation of myotube differentiation (GO:0010830)	1/20	0.132003	0.393648	-1.87761	3.80202	HDAC5
mitotic G2 DNA damage checkpoint (GO:0007095)	1/18	0.119622	0.393648	-1.77159	3.76183	FANCI
histone methylation (GO:0016571)	1/20	0.132003	0.393648	-1.85247	3.75113	EHMT2
positive regulation of intracellular protein transport (GO:0090316)	3/153	0.0939691	0.393648	-1.58004	3.73645	ZBTB17;HTRA2;OAZ1
regulation of oxidative stress-induced intrinsic apoptotic signaling pathway (GO:1902175)	1/19	0.125834	0.393648	-1.79532	3.72132	HTRA2
regulation of response to cytokine stimulus (GO:0060759)	1/21	0.138128	0.393648	-1.86587	3.69363	IRAK1
response to interferon-beta (GO:0035456)	1/20	0.132003	0.393648	-1.82019	3.68575	HTRA2
negative regulation of protein depolymerization (GO:1901880)	1/21	0.138128	0.393648	-1.8568	3.67566	NAV3
negative regulation of transcription factor import into nucleus (GO:0042992)	1/24	0.156249	0.395402	-1.97815	3.67205	PPM1A
hydrogen peroxide metabolic process (GO:0042743)	1/21	0.138128	0.393648	-1.83639	3.63527	PXDN
regulation of transcription from RNA polymerase II promoter (GO:0006357)	16/1479	0.0571829	0.393648	-1.26998	3.63404	ZBTB17;HDAC5;ZGPAT;RPL10;HDAC10;EHMT2;ZC3H8;RFX1;FOXP4;NPAS4;TIAL1;PPM1A;IRF3;HSF1;INHA;GABPA
regulation of dendrite extension (GO:1903859)	1/19	0.125834	0.393648	-1.75158	3.63065	ITSN2
positive regulation of ion transmembrane transporter activity (GO:0032414)	1/24	0.156249	0.395402	-1.95474	3.6286	WNK4
excitatory postsynaptic potential (GO:0060079)	1/20	0.132003	0.393648	-1.79141	3.62748	NPAS4
negative regulation of macroautophagy (GO:0016242)	1/22	0.144211	0.393648	-1.87176	3.62463	NRBP2
mRNA cis splicing, via spliceosome (GO:0045292)	1/18	0.119622	0.393648	-1.70633	3.62325	PRPF39
establishment of endothelial barrier (GO:0061028)	1/22	0.144211	0.393648	-1.86837	3.61805	TJP2
nuclear transport (GO:0051169)	1/23	0.150251	0.393648	-1.90685	3.61433	EIF5A
prostaglandin biosynthetic process (GO:0001516)	1/19	0.125834	0.393648	-1.72876	3.58335	PTGIS
mitochondrial fission (GO:0000266)	1/22	0.144211	0.393648	-1.83944	3.56204	DNM1
triglyceride biosynthetic process (GO:0019432)	1/20	0.132003	0.393648	-1.75828	3.56039	DGAT1
cellular response to unfolded protein (GO:0034620)	1/23	0.150251	0.393648	-1.86585	3.53662	HSF1
regulation of autophagy (GO:0010506)	4/204	0.0565347	0.393648	-1.22719	3.52559	ZBTB17;HTRA2;WDR24;RASIP1
negative regulation of supramolecular fiber organization (GO:1902904)	2/55	0.057501	0.393648	-1.23375	3.52354	NAV3;KANK3
RNA export from nucleus (GO:0006405)	3/120	0.0531008	0.393648	-1.19289	3.50181	EIF5A;SRSF6;SRSF7
negative regulation of cell migration (GO:0030336)	3/122	0.0552697	0.393648	-1.20787	3.49741	NAV3;CHRD;PTPRK
cilium-dependent cell motility (GO:0060285)	1/25	0.162204	0.395402	-1.92015	3.49256	CCDC65
meiosis I (GO:0007127)	1/22	0.144211	0.393648	-1.79113	3.46849	SYCP3
negative regulation of epithelial cell proliferation (GO:0050680)	2/67	0.0811205	0.393648	-1.3736	3.45024	PTPRM;PTPRK
synapsis (GO:0007129)	1/21	0.138128	0.393648	-1.74155	3.44752	BAG6
negative regulation of protein tyrosine kinase activity (GO:0061099)	1/22	0.144211	0.393648	-1.78006	3.44704	ZGPAT
regulation of microtubule depolymerization (GO:0031114)	1/23	0.150251	0.393648	-1.81543	3.44105	NAV3
ribosomal large subunit biogenesis (GO:0042273)	2/64	0.0749667	0.393648	-1.32554	3.43408	RPL10;NLE1
negative regulation of cytokine biosynthetic process (GO:0042036)	1/22	0.144211	0.393648	-1.77298	3.43334	INHA
transcription, DNA-templated (GO:0006351)	5/357	0.108559	0.393648	-1.53764	3.41428	IRF3;HSF1;MMS19;POLRMT;GABPA
regulation of ion homeostasis (GO:2000021)	1/24	0.156249	0.395402	-1.83653	3.40917	WNK4
cellular response to decreased oxygen levels (GO:0036294)	2/65	0.0770007	0.393648	-1.32447	3.39586	PTGIS;FMN2
stress-activated MAPK cascade (GO:0051403)	2/63	0.0729504	0.393648	-1.29592	3.39268	MAP4K2;IRAK1
ncRNA 3'-end processing (GO:0043628)	1/26	0.168118	0.397155	-1.89158	3.37286	ELAC2
cellular response to catecholamine stimulus (GO:0071870)	1/24	0.156249	0.395402	-1.80442	3.34956	GABPA
neutrophil degranulation (GO:0043312)	6/480	0.124241	0.393648	-1.59918	3.33514	GALNS;TSPAN14;DPP7;DGAT1;TBC1D10C;SPTAN1
peptidyl-tyrosine dephosphorylation (GO:0035335)	1/26	0.168118	0.397155	-1.86279	3.32152	PTPRF
regulation of interleukin-2 production (GO:0032663)	1/22	0.144211	0.393648	-1.71501	3.32108	NAV3
negative regulation of protein polymerization (GO:0032272)	1/23	0.150251	0.393648	-1.75141	3.31972	KANK3
RNA transport (GO:0050658)	2/81	0.111685	0.393648	-1.49628	3.27997	SRSF6;SRSF7
RNA 3'-end processing (GO:0031123)	2/62	0.0709522	0.393648	-1.23923	3.2787	SRSF6;SRSF7
positive regulation of protein targeting to mitochondrion (GO:1903955)	2/82	0.11397	0.393648	-1.50465	3.26782	ZBTB17;HTRA2
sensory perception of pain (GO:0019233)	1/25	0.162204	0.395402	-1.79439	3.26382	KCNK4
negative regulation of transmembrane receptor protein serine/threonine kinase signaling pathway (GO:0090101)	2/78	0.104903	0.393648	-1.44411	3.25606	PPM1A;CHRD
homologous chromosome segregation (GO:0045143)	1/19	0.125834	0.393648	-1.55181	3.21658	FMN2
cellular response to misfolded protein (GO:0071218)	1/22	0.144211	0.393648	-1.66077	3.21604	BAG6
regulation of transcription from RNA polymerase III promoter (GO:0006359)	1/23	0.150251	0.393648	-1.6964	3.21544	ZC3H8
prostaglandin metabolic process (GO:0006693)	1/26	0.168118	0.397155	-1.8026	3.2142	PTGIS
intrinsic apoptotic signaling pathway in response to endoplasmic reticulum stress (GO:0070059)	1/25	0.162204	0.395402	-1.75582	3.19366	BAG6
mitotic G2/M transition checkpoint (GO:0044818)	1/24	0.156249	0.395402	-1.71891	3.19083	FANCI
regulation of T cell migration (GO:2000404)	1/18	0.119622	0.393648	-1.50135	3.18801	LRCH1
regulation of centrosome cycle (GO:0046605)	1/27	0.17399	0.399052	-1.81883	3.1807	AURKA
positive regulation of double-strand break repair (GO:2000781)	1/16	0.107066	0.393648	-1.42175	3.17664	MMS19
regulation of Notch signaling pathway (GO:0008593)	2/71	0.0895578	0.393648	-1.31409	3.17072	TSPAN14;ARRDC1
negative regulation of actin filament polymerization (GO:0030837)	1/23	0.150251	0.393648	-1.65002	3.12752	KANK3
negative regulation of ion transport (GO:0043271)	1/21	0.138128	0.393648	-1.57875	3.12525	WNK4
negative regulation of sprouting angiogenesis (GO:1903671)	1/23	0.150251	0.393648	-1.64724	3.12225	HDAC5
misfolded or incompletely synthesized protein catabolic process (GO:0006515)	1/26	0.168118	0.397155	-1.74848	3.1177	BAG6
negative regulation of endothelial cell proliferation (GO:0001937)	1/31	0.197071	0.408453	-1.91527	3.11075	PTPRM
response to copper ion (GO:0046688)	1/26	0.168118	0.397155	-1.74006	3.10268	HSF1
regulation of microtubule cytoskeleton organization (GO:0070507)	1/24	0.156249	0.395402	-1.66994	3.09992	AURKA
histone lysine methylation (GO:0034968)	1/23	0.150251	0.393648	-1.63358	3.09637	EHMT2
neutrophil mediated immunity (GO:0002446)	6/488	0.131394	0.393648	-1.52391	3.09287	GALNS;TSPAN14;DPP7;DGAT1;TBC1D10C;SPTAN1
regulation of epidermal growth factor-activated receptor activity (GO:0007176)	1/25	0.162204	0.395402	-1.69762	3.0878	ZGPAT
SRP-dependent cotranslational protein targeting to membrane (GO:0006614)	2/90	0.132665	0.393648	-1.52851	3.08748	RPL10;RPL22
positive regulation of cell cycle arrest (GO:0071158)	2/83	0.116268	0.393648	-1.42834	3.07358	ZBTB17;AURKA
termination of RNA polymerase II transcription (GO:0006369)	2/69	0.0853071	0.393648	-1.24747	3.07064	SRSF6;SRSF7
negative regulation of oxidative stress-induced cell death (GO:1903202)	1/25	0.162204	0.395402	-1.67761	3.05141	HTRA2
protein localization to cell surface (GO:0034394)	1/23	0.150251	0.393648	-1.60389	3.0401	PTPRK
negative regulation of cellular process (GO:0048523)	7/535	0.0847601	0.393648	-1.2291	3.03332	ZBTB17;HTRA2;PTPRK;PPP2R5C;INHA;SRSF6;IP6K2
positive regulation of microtubule polymerization (GO:0031116)	1/25	0.162204	0.395402	-1.66761	3.03321	NAV3
protein targeting to ER (GO:0045047)	2/98	0.151996	0.395402	-1.60704	3.02751	RPL10;RPL22
positive regulation of interferon-beta production (GO:0032728)	1/27	0.17399	0.399052	-1.73051	3.02625	IRF3
negative regulation of microtubule polymerization or depolymerization (GO:0031111)	1/28	0.179822	0.399052	-1.75532	3.01177	NAV3
BMP signaling pathway (GO:0030509)	2/82	0.11397	0.393648	-1.37954	2.99611	CHRD;INHA
mRNA 3'-end processing (GO:0031124)	2/75	0.0982414	0.393648	-1.28927	2.99154	SRSF6;SRSF7
regulation of NF-kappaB import into nucleus (GO:0042345)	1/27	0.17399	0.399052	-1.70417	2.98017	PPM1A
long-chain fatty-acyl-CoA metabolic process (GO:0035336)	1/26	0.168118	0.397155	-1.66292	2.96514	DGAT1
axoneme assembly (GO:0035082)	1/25	0.162204	0.395402	-1.62978	2.9644	CCDC65
negative regulation of phosphorylation (GO:0042326)	2/76	0.100448	0.393648	-1.28886	2.96195	FKBP8;INHA
cellular response to ammonium ion (GO:0071242)	1/24	0.156249	0.395402	-1.59546	2.96166	GABPA
respiratory tube development (GO:0030323)	1/26	0.168118	0.397155	-1.64688	2.93653	BAG6
nucleotide-binding domain, leucine rich repeat containing receptor signaling pathway (GO:0035872)	1/26	0.168118	0.397155	-1.64522	2.93358	IRAK1
negative regulation of cytoskeleton organization (GO:0051494)	1/25	0.162204	0.395402	-1.60882	2.92629	KANK3
liver development (GO:0001889)	1/32	0.202741	0.414854	-1.8279	2.91701	AURKA
JNK cascade (GO:0007254)	2/67	0.0811205	0.393648	-1.15925	2.91182	MAP4K2;IRAK1
negative regulation of protein binding (GO:0032091)	2/68	0.0832056	0.393648	-1.16904	2.90676	PTPRF;AURKA
mitotic spindle organization (GO:0007052)	2/75	0.0982414	0.393648	-1.25273	2.90674	CEP126;AURKA
regulation of apoptotic process (GO:0042981)	9/816	0.123106	0.393648	-1.38683	2.90499	MAP4K2;PTGIS;IRAK1;RPL10;HTRA2;FMN2;INHA;IP6K2;FGD2
cytoplasmic pattern recognition receptor signaling pathway (GO:0002753)	1/25	0.162204	0.395402	-1.59681	2.90444	IRAK1
internal peptidyl-lysine acetylation (GO:0018393)	1/27	0.17399	0.399052	-1.64207	2.87158	BAG6
regulation of gene expression, epigenetic (GO:0040029)	2/75	0.0982414	0.393648	-1.23546	2.86668	HDAC5;AEBP2
cellular response to topologically incorrect protein (GO:0035967)	1/28	0.179822	0.399052	-1.66446	2.85586	HSF1
TRIF-dependent toll-like receptor signaling pathway (GO:0035666)	1/30	0.191362	0.403346	-1.72405	2.85087	IRF3
regulation of hydrolase activity (GO:0051336)	2/81	0.111685	0.393648	-1.29613	2.84121	RASIP1;FGD2
negative regulation of transcription, DNA-templated (GO:0045892)	9/814	0.121787	0.393648	-1.3494	2.84113	HDAC5;PPM1A;ZGPAT;RPL10;HDAC10;EHMT2;HSF1;ZC3H8;PTPRK
positive regulation of nuclear division (GO:0051785)	1/26	0.168118	0.397155	-1.59273	2.83998	AURKA
MyD88-dependent toll-like receptor signaling pathway (GO:0002755)	1/30	0.191362	0.403346	-1.70584	2.82076	IRAK1
positive regulation of microtubule polymerization or depolymerization (GO:0031112)	1/25	0.162204	0.395402	-1.55077	2.82069	NAV3
negative regulation of oxidative stress-induced intrinsic apoptotic signaling pathway (GO:1902176)	1/19	0.125834	0.393648	-1.35245	2.80335	HTRA2
translation (GO:0006412)	4/233	0.0829713	0.393648	-1.12125	2.79109	MRPL2;RPL10;RPL22;TARS2
nucleotide-binding oligomerization domain containing signaling pathway (GO:0070423)	1/29	0.185612	0.401285	-1.65469	2.78666	IRAK1
negative regulation of cell death (GO:0060548)	2/82	0.11397	0.393648	-1.2825	2.78537	HTRA2;SRSF6
regulation of extrinsic apoptotic signaling pathway in absence of ligand (GO:2001239)	1/28	0.179822	0.399052	-1.61026	2.76286	HTRA2
regulation of keratinocyte differentiation (GO:0045616)	1/30	0.191362	0.403346	-1.67073	2.7627	SRSF6
negative regulation of gene expression, epigenetic (GO:0045814)	1/26	0.168118	0.397155	-1.54519	2.75521	AEBP2
organelle fission (GO:0048285)	1/29	0.185612	0.401285	-1.62911	2.74357	DNM1
response to gamma radiation (GO:0010332)	1/27	0.17399	0.399052	-1.5622	2.73191	HSF1
regulation of protein catabolic process (GO:0042176)	2/92	0.137443	0.393648	-1.37423	2.72722	FMN2;OAZ1
NAD biosynthetic process (GO:0009435)	1/23	0.150251	0.393648	-1.43802	2.72569	PTGIS
positive regulation of translation (GO:0045727)	2/79	0.107151	0.393648	-1.21488	2.71345	EIF5A;PYM1
transcription from RNA polymerase III promoter (GO:0006383)	1/28	0.179822	0.399052	-1.57934	2.70982	ZC3H8
protein export from nucleus (GO:0006611)	1/29	0.185612	0.401285	-1.60537	2.70359	EIF5A
lung development (GO:0030324)	1/30	0.191362	0.403346	-1.6276	2.69139	BAG6
hippo signaling (GO:0035329)	1/31	0.197071	0.408453	-1.65518	2.68832	TJP2
negative regulation of proteasomal ubiquitin-dependent protein catabolic process (GO:0032435)	1/25	0.162204	0.395402	-1.47346	2.68008	BAG6
female gamete generation (GO:0007292)	1/26	0.168118	0.397155	-1.49889	2.67266	FMN2
cellular response to copper ion (GO:0071280)	1/22	0.144211	0.393648	-1.37703	2.66658	HSF1
negative regulation of Notch signaling pathway (GO:0045746)	1/30	0.191362	0.403346	-1.6123	2.66609	ARRDC1
activation of GTPase activity (GO:0090630)	2/85	0.120898	0.393648	-1.26005	2.66224	TBC1D10C;RUNDC1
regulation of mRNA processing (GO:0050684)	1/29	0.185612	0.401285	-1.57384	2.6505	SRPK3
positive regulation of transcription from RNA polymerase II promoter in response to stress (GO:0036003)	1/30	0.191362	0.403346	-1.60165	2.64848	HSF1
regulation of cell migration involved in sprouting angiogenesis (GO:0090049)	1/31	0.197071	0.408453	-1.61931	2.63007	HDAC5
erythrocyte differentiation (GO:0030218)	1/36	0.225024	0.416839	-1.7632	2.6299	INHA
regulation of protein targeting to mitochondrion (GO:1903214)	2/89	0.130291	0.393648	-1.28443	2.61765	ZBTB17;HTRA2
negative regulation of interferon-gamma production (GO:0032689)	1/21	0.138128	0.393648	-1.32205	2.61709	INHA
Golgi vesicle transport (GO:0048193)	4/272	0.126365	0.393648	-1.263	2.61262	NRBP2;COG1;KIF22;SPTAN1
positive regulation of I-kappaB kinase/NF-kappaB signaling (GO:0043123)	3/164	0.109787	0.393648	-1.18173	2.61069	PPM1A;IRAK1;MIB2
negative regulation of neuron death (GO:1901215)	2/84	0.118577	0.393648	-1.22134	2.60413	NRBP2;HTRA2
cellular response to cadmium ion (GO:0071276)	1/30	0.191362	0.403346	-1.5744	2.60341	HSF1
response to interleukin-1 (GO:0070555)	2/77	0.102669	0.393648	-1.13635	2.5866	PTGIS;IRAK1
respiratory system development (GO:0060541)	1/30	0.191362	0.403346	-1.56053	2.58047	BAG6
regulation of double-strand break repair via homologous recombination (GO:0010569)	1/28	0.179822	0.399052	-1.50118	2.57571	MMS19
MyD88-independent toll-like receptor signaling pathway (GO:0002756)	1/31	0.197071	0.408453	-1.58501	2.57435	IRF3
regulation of intracellular protein transport (GO:0033157)	1/34	0.213961	0.416839	-1.66473	2.56695	OAZ1
protein catabolic process (GO:0030163)	2/82	0.11397	0.393648	-1.17512	2.55215	BAG6;HTRA2
negative regulation of osteoblast differentiation (GO:0045668)	1/28	0.179822	0.399052	-1.48517	2.54824	CHRD
ER to Golgi vesicle-mediated transport (GO:0006888)	3/181	0.136065	0.393648	-1.26827	2.52972	NRBP2;COG1;SPTAN1
negative regulation of GTPase activity (GO:0034260)	1/23	0.150251	0.393648	-1.33216	2.52505	LRCH1
mRNA metabolic process (GO:0016071)	2/98	0.151996	0.395402	-1.34021	2.52482	HSF1;SRSF7
DNA repair (GO:0006281)	4/289	0.147764	0.393648	-1.30948	2.50391	FANCI;RNASEH2A;MMS19;FANCG
negative regulation of myeloid leukocyte differentiation (GO:0002762)	1/28	0.179822	0.399052	-1.45635	2.49879	INHA
mismatch repair (GO:0006298)	1/33	0.20837	0.416839	-1.5917	2.49649	RNASEH2A
small GTPase mediated signal transduction (GO:0007264)	2/100	0.156913	0.395402	-1.34107	2.48375	USP28;RUNDC3A
negative regulation of BMP signaling pathway (GO:0030514)	1/33	0.20837	0.416839	-1.58289	2.48267	CHRD
rRNA metabolic process (GO:0016072)	3/201	0.169403	0.399052	-1.39724	2.48076	RPL10;RPL22;TSR1
intrinsic apoptotic signaling pathway (GO:0097193)	2/102	0.16186	0.395402	-1.3581	2.47313	BAG6;HTRA2
regulation of type I interferon production (GO:0032479)	2/86	0.12323	0.393648	-1.17849	2.4674	IRF3;IRAK1
negative regulation of proteasomal protein catabolic process (GO:1901799)	1/29	0.185612	0.401285	-1.45708	2.45387	BAG6
negative regulation of NF-kappaB transcription factor activity (GO:0032088)	2/83	0.116268	0.393648	-1.13835	2.44957	PTGIS;IRAK1
phosphorylation (GO:0016310)	5/387	0.138764	0.393648	-1.23952	2.44803	NRBP2;MAP4K2;IRAK1;WNK4;AURKA
negative regulation of blood vessel endothelial cell migration (GO:0043537)	1/32	0.202741	0.414854	-1.5223	2.42933	HDAC5
regulation of alcohol biosynthetic process (GO:1902930)	1/35	0.219512	0.416839	-1.60045	2.42684	GGPS1
vasculogenesis (GO:0001570)	1/33	0.20837	0.416839	-1.53795	2.41218	RASIP1
cellular response to acid chemical (GO:0071229)	2/92	0.137443	0.393648	-1.21349	2.40823	HTRA2;KCNK4
cellular response to oxidative stress (GO:0034599)	2/116	0.197184	0.408453	-1.47401	2.39323	HTRA2;PTPRK
activation of JUN kinase activity (GO:0007257)	1/31	0.197071	0.408453	-1.46514	2.37967	MAP4K2
keratan sulfate metabolic process (GO:0042339)	1/35	0.219512	0.416839	-1.5617	2.36808	GALNS
regulation of wound healing (GO:0061041)	1/35	0.219512	0.416839	-1.54805	2.34739	SRSF6
response to growth factor (GO:0070848)	1/27	0.17399	0.399052	-1.33099	2.32757	HTRA2
positive regulation of Notch signaling pathway (GO:0045747)	1/34	0.213961	0.416839	-1.50509	2.32079	TSPAN14
regulation of interferon-beta production (GO:0032648)	1/35	0.219512	0.416839	-1.52997	2.31997	IRF3
cotranslational protein targeting to membrane (GO:0006613)	2/94	0.142259	0.393648	-1.18656	2.31392	RPL10;RPL22
cellular macromolecular complex assembly (GO:0034622)	1/35	0.219512	0.416839	-1.52426	2.31131	HSF1
axonemal dynein complex assembly (GO:0070286)	1/34	0.213961	0.416839	-1.4988	2.3111	CCDC65
organelle transport along microtubule (GO:0072384)	1/32	0.202741	0.414854	-1.44351	2.3036	RHOT2
coenzyme biosynthetic process (GO:0009108)	1/30	0.191362	0.403346	-1.38333	2.28746	PPCDC
negative regulation of receptor activity (GO:2000272)	1/33	0.20837	0.416839	-1.45471	2.28163	ZGPAT
positive regulation of organelle organization (GO:0010638)	1/34	0.213961	0.416839	-1.47545	2.27509	HTRA2
positive regulation of extrinsic apoptotic signaling pathway (GO:2001238)	1/29	0.185612	0.401285	-1.35085	2.27496	HTRA2
negative regulation of endothelial cell migration (GO:0010596)	1/35	0.219512	0.416839	-1.49427	2.26584	PTPRM
G2 DNA damage checkpoint (GO:0031572)	1/33	0.20837	0.416839	-1.44304	2.26332	FANCI
phosphatidylinositol phosphorylation (GO:0046854)	1/28	0.179822	0.399052	-1.30963	2.24704	IP6K2
maturation of SSU-rRNA from tricistronic rRNA transcript (SSU-rRNA, 5.8S rRNA, LSU-rRNA) (GO:0000462)	1/36	0.225024	0.416839	-1.4976	2.23374	TSR1
regulation of cell death (GO:0010941)	2/97	0.149549	0.393648	-1.17472	2.23211	HTRA2;SRSF6
positive regulation of NIK/NF-kappaB signaling (GO:1901224)	1/36	0.225024	0.416839	-1.49163	2.22484	IRAK1
viral transcription (GO:0019083)	2/114	0.192075	0.403838	-1.34531	2.21958	RPL10;RPL22
response to cadmium ion (GO:0046686)	1/32	0.202741	0.414854	-1.39077	2.21943	HSF1
cholesterol biosynthetic process (GO:0006695)	1/36	0.225024	0.416839	-1.48651	2.21721	GGPS1
carboxylic acid metabolic process (GO:0019752)	1/34	0.213961	0.416839	-1.43734	2.21632	PTGIS
negative regulation of protein complex assembly (GO:0031333)	1/36	0.225024	0.416839	-1.47939	2.20659	PPM1A
secondary alcohol biosynthetic process (GO:1902653)	1/37	0.230497	0.418217	-1.49918	2.20007	GGPS1
epithelial tube morphogenesis (GO:0060562)	1/35	0.219512	0.416839	-1.44793	2.19556	RASIP1
intra-Golgi vesicle-mediated transport (GO:0006891)	1/34	0.213961	0.416839	-1.42348	2.19496	COG1
nuclear-transcribed mRNA catabolic process (GO:0000956)	3/175	0.126554	0.393648	-1.0577	2.18636	RPL10;RPL22;PYM1
actin polymerization or depolymerization (GO:0008154)	1/37	0.230497	0.418217	-1.48919	2.18542	WASF3
protein processing (GO:0016485)	2/102	0.16186	0.395402	-1.19771	2.18105	HTRA2;RHBDL3
regulation of muscle cell differentiation (GO:0051147)	1/37	0.230497	0.418217	-1.48483	2.17902	MAPK12
phosphate-containing compound metabolic process (GO:0006796)	3/184	0.140911	0.393648	-1.11115	2.17743	PPM1A;PLCB3;IP6K2
cellular protein modification process (GO:0006464)	10/1002	0.170132	0.399052	-1.22466	2.16909	PPP1CC;PPM1A;NRBP2;MAP4K2;IRAK1;MXRA8;WNK4;PTPRM;PTPRK;AURKA
positive regulation of apoptotic process (GO:0043065)	4/308	0.173209	0.399052	-1.23158	2.15928	PTGIS;HTRA2;IP6K2;FGD2
protein peptidyl-prolyl isomerization (GO:0000413)	1/38	0.235932	0.423972	-1.48994	2.15179	FKBP8
endosome organization (GO:0007032)	1/37	0.230497	0.418217	-1.46368	2.14797	DNM1
positive regulation of TOR signaling (GO:0032008)	1/33	0.20837	0.416839	-1.36796	2.14556	WDR24
mitotic DNA damage checkpoint (GO:0044773)	1/40	0.246688	0.433121	-1.52384	2.13281	FANCI
rRNA processing (GO:0006364)	3/203	0.17286	0.399052	-1.21007	2.12401	RPL10;RPL22;TSR1
viral gene expression (GO:0019080)	2/111	0.184446	0.401285	-1.25398	2.11972	RPL10;RPL22
neutrophil activation involved in immune response (GO:0002283)	6/484	0.127793	0.393648	-1.02558	2.10998	GALNS;TSPAN14;DPP7;DGAT1;TBC1D10C;SPTAN1
sulfur compound catabolic process (GO:0044273)	1/36	0.225024	0.416839	-1.4126	2.10696	GALNS
negative regulation of transcription from RNA polymerase II promoter (GO:0000122)	7/566	0.105918	0.393648	-0.927957	2.08334	HDAC5;PPM1A;ZGPAT;RPL10;HDAC10;EHMT2;HSF1
positive regulation of muscle cell differentiation (GO:0051149)	1/35	0.219512	0.416839	-1.35552	2.05544	MAPK12
DNA-templated transcription, termination (GO:0006353)	2/107	0.174348	0.399052	-1.16731	2.03895	SRSF6;SRSF7
acylglycerol metabolic process (GO:0006639)	1/37	0.230497	0.418217	-1.3865	2.03471	DGAT1
positive regulation of establishment of protein localization to mitochondrion (GO:1903749)	2/111	0.184446	0.401285	-1.1949	2.01985	ZBTB17;HTRA2
regulation of cholesterol biosynthetic process (GO:0045540)	1/41	0.25201	0.436091	-1.46047	2.01294	GGPS1
myeloid cell differentiation (GO:0030099)	1/45	0.272925	0.448301	-1.54231	2.00278	INHA
cellular response to amino acid starvation (GO:0034198)	1/40	0.246688	0.433121	-1.42738	1.9978	WDR24
protein phosphorylation (GO:0006468)	6/471	0.116432	0.393648	-0.925811	1.99091	NRBP2;MAP4K2;IRAK1;WNK4;MAPK12;AURKA
enzyme linked receptor protein signaling pathway (GO:0007167)	2/121	0.210028	0.416839	-1.26416	1.97274	IRAK1;PTPRF
lipid phosphorylation (GO:0046834)	1/36	0.225024	0.416839	-1.32047	1.96955	IP6K2
cellular response to retinoic acid (GO:0071300)	1/43	0.262541	0.445155	-1.47141	1.96778	HTRA2
regulation of postsynaptic membrane potential (GO:0060078)	1/34	0.213961	0.416839	-1.2747	1.96555	NPAS4
response to UV (GO:0009411)	2/99	0.154451	0.395402	-1.05075	1.96267	PTPRK;USP28
apoptotic process (GO:0006915)	3/232	0.224972	0.416839	-1.31394	1.9601	EIF5A;BAG6;IRF3
negative regulation of protein kinase B signaling (GO:0051898)	1/36	0.225024	0.416839	-1.31265	1.95789	PPP2R5C
synaptic vesicle endocytosis (GO:0048488)	1/30	0.191362	0.403346	-1.18357	1.95715	DNM1
negative regulation of epithelial cell migration (GO:0010633)	1/36	0.225024	0.416839	-1.30708	1.94957	PTPRM
Wnt signaling pathway, calcium modulating pathway (GO:0007223)	1/37	0.230497	0.418217	-1.32569	1.94548	PLCB3
chemical homeostasis (GO:0048878)	1/39	0.241329	0.429995	-1.36807	1.94484	WNK4
sterol biosynthetic process (GO:0016126)	1/41	0.25201	0.436091	-1.41051	1.94409	GGPS1
natural killer cell activation (GO:0030101)	1/37	0.230497	0.418217	-1.31894	1.93556	BAG6
regulation of GTPase activity (GO:0043087)	3/189	0.149115	0.393648	-1.00977	1.92163	LRCH1;RASIP1;FGD2
ncRNA processing (GO:0034470)	3/228	0.217594	0.416839	-1.25875	1.91975	RPL10;RPL22;TSR1
protein acetylation (GO:0006473)	1/34	0.213961	0.416839	-1.23838	1.90953	NAA40
DNA damage checkpoint (GO:0000077)	1/39	0.241329	0.429995	-1.3199	1.87637	USP28
peptide transport (GO:0015833)	1/42	0.257294	0.440701	-1.38177	1.8758	ARRDC1
protein polymerization (GO:0051258)	1/46	0.278062	0.452739	-1.4597	1.86828	WASF3
regulation of cell cycle arrest (GO:0071156)	1/49	0.293259	0.460993	-1.52067	1.8654	ZBTB17
regulation of nitric oxide biosynthetic process (GO:0045428)	1/33	0.20837	0.416839	-1.18187	1.85369	PTGIS
positive regulation of mitochondrion organization (GO:0010822)	2/129	0.23074	0.418217	-1.26403	1.85365	ZBTB17;HTRA2
regulation of cellular amide metabolic process (GO:0034248)	1/39	0.241329	0.429995	-1.29803	1.84527	RPL10
RNA catabolic process (GO:0006401)	1/44	0.267751	0.446783	-1.39922	1.84374	RNASEH2A
negative regulation of G0 to G1 transition (GO:0070317)	1/38	0.235932	0.423972	-1.27503	1.84141	EHMT2
positive regulation of mitotic nuclear division (GO:0045840)	1/41	0.25201	0.436091	-1.32522	1.82654	AURKA
regulation of alternative mRNA splicing, via spliceosome (GO:0000381)	1/40	0.246688	0.433121	-1.30194	1.82223	SRSF6
muscle cell differentiation (GO:0042692)	1/37	0.230497	0.418217	-1.24084	1.82096	MAPK12
regulation of cholesterol metabolic process (GO:0090181)	1/42	0.257294	0.440701	-1.32974	1.80518	GGPS1
cellular response to mechanical stimulus (GO:0071260)	1/49	0.293259	0.460993	-1.4662	1.79858	KCNK4
chemical synaptic transmission, postsynaptic (GO:0099565)	1/34	0.213961	0.416839	-1.16463	1.79582	NPAS4
negative regulation of cytokine production (GO:0001818)	2/111	0.184446	0.401285	-1.05653	1.78596	IRF3;NAV3
negative regulation of protein metabolic process (GO:0051248)	1/44	0.267751	0.446783	-1.35238	1.78202	FMN2
positive regulation of cell cycle process (GO:0090068)	2/108	0.176864	0.399052	-1.02579	1.77705	ZBTB17;AURKA
peptidyl-proline modification (GO:0018208)	1/41	0.25201	0.436091	-1.28576	1.77215	FKBP8
coenzyme metabolic process (GO:0006732)	1/52	0.308139	0.473756	-1.50385	1.77034	PPCDC
regulation of sodium ion transport (GO:0002028)	1/36	0.225024	0.416839	-1.18083	1.76127	WNK4
nucleocytoplasmic transport (GO:0006913)	1/47	0.283164	0.452739	-1.39024	1.7541	EIF5A
mitotic metaphase plate congression (GO:0007080)	1/44	0.267751	0.446783	-1.32907	1.75131	KIF22
cellular response to ionizing radiation (GO:0071479)	1/47	0.283164	0.452739	-1.38786	1.7511	HSF1
negative regulation of epidermal growth factor receptor signaling pathway (GO:0042059)	1/41	0.25201	0.436091	-1.26829	1.74806	ZGPAT
positive regulation of intracellular transport (GO:0032388)	1/45	0.272925	0.448301	-1.34487	1.74639	OAZ1
tRNA aminoacylation (GO:0043039)	1/41	0.25201	0.436091	-1.26185	1.7392	TARS2
cellular response to starvation (GO:0009267)	2/108	0.176864	0.399052	-1.00345	1.73835	EHMT2;WDR24
negative regulation of proteolysis (GO:0045861)	1/42	0.257294	0.440701	-1.27856	1.73569	BAG6
regulation of ion transmembrane transporter activity (GO:0032412)	1/43	0.262541	0.445155	-1.29089	1.72636	WNK4
regulation of steroid biosynthetic process (GO:0050810)	1/45	0.272925	0.448301	-1.32655	1.7226	GGPS1
sodium-independent organic anion transport (GO:0043252)	1/38	0.235932	0.423972	-1.1927	1.72251	MFSD10
regulation of I-kappaB kinase/NF-kappaB signaling (GO:0043122)	3/205	0.176337	0.399052	-0.991361	1.72036	PPM1A;IRAK1;MIB2
DNA metabolic process (GO:0006259)	4/315	0.182947	0.401285	-1.00856	1.7131	RNASEH2A;NAP1L1;MMS19;FANCG
DNA replication (GO:0006260)	2/121	0.210028	0.416839	-1.0942	1.70751	RNASEH2A;NAP1L1
regulation of microtubule polymerization (GO:0031113)	1/36	0.225024	0.416839	-1.14343	1.70548	NAV3
regulation of cellular amino acid metabolic process (GO:0006521)	1/52	0.308139	0.473756	-1.44449	1.70046	OAZ1
branching morphogenesis of an epithelial tube (GO:0048754)	1/44	0.267751	0.446783	-1.28875	1.69819	RASIP1
regulation of G0 to G1 transition (GO:0070316)	1/40	0.246688	0.433121	-1.2117	1.69594	EHMT2
plasma membrane bounded cell projection assembly (GO:0120031)	3/242	0.243621	0.432486	-1.19656	1.68971	CEP126;CCDC65;FGD2
posttranscriptional regulation of gene expression (GO:0010608)	1/45	0.272925	0.448301	-1.29946	1.68743	RPL10
negative regulation of ossification (GO:0030279)	1/46	0.278062	0.452739	-1.31685	1.68544	CHRD
protein methylation (GO:0006479)	1/47	0.283164	0.452739	-1.32982	1.67788	EHMT2
response to unfolded protein (GO:0006986)	1/44	0.267751	0.446783	-1.26537	1.66737	HSF1
tRNA aminoacylation for protein translation (GO:0006418)	1/47	0.283164	0.452739	-1.32072	1.6664	TARS2
arachidonic acid metabolic process (GO:0019369)	1/52	0.308139	0.473756	-1.39881	1.64668	PTGIS
regulation of DNA metabolic process (GO:0051052)	1/47	0.283164	0.452739	-1.29528	1.6343	EHMT2
negative regulation of protein catabolic process (GO:0042177)	1/40	0.246688	0.433121	-1.16162	1.62584	FMN2
maturation of SSU-rRNA (GO:0030490)	1/47	0.283164	0.452739	-1.28731	1.62423	TSR1
negative regulation of catabolic process (GO:0009895)	1/41	0.25201	0.436091	-1.1716	1.6148	FMN2
macromolecular complex assembly (GO:0065003)	2/121	0.210028	0.416839	-1.03073	1.60848	HSF1;WASF3
positive regulation of signal transduction (GO:0009967)	3/207	0.179834	0.399052	-0.917492	1.57416	PPM1A;TSPAN14;PTGIS
negative regulation of type I interferon production (GO:0032480)	1/45	0.272925	0.448301	-1.20629	1.56643	IRF3
positive regulation of JUN kinase activity (GO:0043507)	1/51	0.303214	0.471355	-1.29577	1.54626	MAP4K2
nucleobase-containing compound catabolic process (GO:0034655)	1/44	0.267751	0.446783	-1.15908	1.52732	RNASEH2A
negative regulation of sequence-specific DNA binding transcription factor activity (GO:0043433)	2/141	0.262024	0.445155	-1.13884	1.52527	PTGIS;IRAK1
protein complex disassembly (GO:0043241)	1/47	0.283164	0.452739	-1.20687	1.52275	PYM1
positive regulation of pathway-restricted SMAD protein phosphorylation (GO:0010862)	1/48	0.288229	0.456499	-1.21057	1.50594	INHA
positive regulation of developmental growth (GO:0048639)	1/52	0.308139	0.473756	-1.27314	1.49874	ITSN2
regulation of cellular amine metabolic process (GO:0033238)	1/52	0.308139	0.473756	-1.26704	1.49157	OAZ1
regulation of cellular protein metabolic process (GO:0032268)	1/51	0.303214	0.471355	-1.2439	1.48436	RPL10
pattern recognition receptor signaling pathway (GO:0002221)	1/49	0.293259	0.460993	-1.17458	1.44086	IRAK1
regulation of signal transduction by p53 class mediator (GO:1901796)	2/139	0.256801	0.440701	-1.05441	1.43342	EHMT2;AURKA
regulation of macromolecule metabolic process (GO:0060255)	2/130	0.23334	0.422019	-0.984103	1.43212	SRPK3;MAPK12
positive regulation of proteolysis (GO:0045862)	1/53	0.313029	0.477781	-1.23269	1.43172	MAPK12
negative regulation of I-kappaB kinase/NF-kappaB signaling (GO:0043124)	1/48	0.288229	0.456499	-1.139	1.41691	PPM1A
ribosome biogenesis (GO:0042254)	3/227	0.215758	0.416839	-0.923416	1.41615	RPL10;RPL22;TSR1
cytoplasmic microtubule organization (GO:0031122)	1/49	0.293259	0.460993	-1.15333	1.41479	CEP126
response to retinoic acid (GO:0032526)	1/58	0.336971	0.495441	-1.29196	1.40535	HTRA2
cellular response to hypoxia (GO:0071456)	2/133	0.24115	0.429995	-0.985992	1.40241	PTGIS;FMN2
membrane fusion (GO:0061025)	1/55	0.322707	0.487247	-1.23386	1.3955	DNM1
cytoskeleton organization (GO:0007010)	2/127	0.225547	0.41689	-0.936394	1.3945	WASF3;FGD2
RNA methylation (GO:0001510)	1/50	0.298254	0.46623	-1.1369	1.37543	THUMPD3
mRNA splicing, via spliceosome (GO:0000398)	3/262	0.281585	0.452739	-1.08345	1.37308	SRPK3;SRSF6;SRSF7
positive regulation of cellular amide metabolic process (GO:0034250)	1/62	0.355526	0.506775	-1.32242	1.36759	PYM1
activation of MAPK activity (GO:0000187)	2/118	0.20231	0.414854	-0.854772	1.36588	MAP4K2;IRAK1
glycosaminoglycan catabolic process (GO:0006027)	1/57	0.33225	0.492808	-1.23859	1.36476	GALNS
positive regulation of cell death (GO:0010942)	1/58	0.336971	0.495441	-1.25292	1.36287	HTRA2
icosanoid metabolic process (GO:0006690)	1/47	0.283164	0.452739	-1.07648	1.35823	PTGIS
negative regulation of nucleic acid-templated transcription (GO:1903507)	5/445	0.206031	0.416839	-0.849916	1.34264	HDAC5;ZGPAT;HDAC10;ZC3H8;PTPRK
receptor internalization (GO:0031623)	1/51	0.303214	0.471355	-1.12403	1.34132	DNM1
negative regulation of cellular biosynthetic process (GO:0031327)	1/48	0.288229	0.456499	-1.07763	1.34057	PTGIS
Notch signaling pathway (GO:0007219)	1/56	0.327495	0.489207	-1.1987	1.33809	NLE1
negative regulation of cellular response to transforming growth factor beta stimulus (GO:1903845)	1/54	0.317885	0.481696	-1.16363	1.3336	PPM1A
modification-dependent protein catabolic process (GO:0019941)	2/142	0.264636	0.446783	-1.003	1.33339	BAG6;ARRDC1
embryonic organ development (GO:0048568)	1/54	0.317885	0.481696	-1.15064	1.31871	RPL10
regulation of BMP signaling pathway (GO:0030510)	1/57	0.33225	0.492808	-1.1922	1.31365	CHRD
skeletal system development (GO:0001501)	2/147	0.277695	0.452739	-1.01004	1.2941	CHRD;INHA
metaphase plate congression (GO:0051310)	1/45	0.272925	0.448301	-0.994544	1.29147	KIF22
B cell differentiation (GO:0030183)	1/53	0.313029	0.477781	-1.11188	1.2914	HDAC5
negative regulation of cellular response to growth factor stimulus (GO:0090288)	1/56	0.327495	0.489207	-1.15552	1.28989	CHRD
cellular response to nutrient levels (GO:0031669)	1/55	0.322707	0.487247	-1.1371	1.28607	EHMT2
negative regulation of G2/M transition of mitotic cell cycle (GO:0010972)	1/63	0.360084	0.506821	-1.23198	1.25837	AURKA
positive regulation of cysteine-type endopeptidase activity (GO:2001056)	1/56	0.327495	0.489207	-1.12103	1.25139	HTRA2
aminoglycan biosynthetic process (GO:0006023)	1/47	0.283164	0.452739	-0.990611	1.24988	NDST2
positive regulation of protein transport (GO:0051222)	1/57	0.33225	0.492808	-1.12285	1.23723	OAZ1
chloride transmembrane transport (GO:1902476)	1/58	0.336971	0.495441	-1.12432	1.22298	CLCN2
regulation of cell division (GO:0051302)	1/66	0.373566	0.51251	-1.23799	1.219	AURKA
regulation of small GTPase mediated signal transduction (GO:0051056)	2/141	0.262024	0.445155	-0.909282	1.21782	RHOT2;FGD2
positive regulation of transcription, DNA-templated (GO:0045893)	10/1121	0.266946	0.446783	-0.909797	1.20158	NPAS4;ZBTB17;HDAC5;PPM1A;IRF3;IRAK1;HSF1;ZC3H8;MMS19;GABPA
regulation of vesicle-mediated transport (GO:0060627)	2/139	0.256801	0.440701	-0.871733	1.18508	TBC1D10C;RUNDC1
cellular response to organic substance (GO:0071310)	2/134	0.243756	0.432486	-0.838617	1.18378	HTRA2;MAPK12
kidney development (GO:0001822)	1/64	0.364609	0.506837	-1.16517	1.17557	BAG6
receptor metabolic process (GO:0043112)	1/59	0.341659	0.497981	-1.07904	1.15883	DNM1
regulation of cellular ketone metabolic process (GO:0010565)	1/62	0.355526	0.506775	-1.11716	1.15531	OAZ1
cellular response to cytokine stimulus (GO:0071345)	5/457	0.221148	0.416839	-0.756251	1.14112	SELPLG;PTGIS;LRCH1;IRAK1;HTRA2
negative regulation of protein modification process (GO:0031400)	1/64	0.364609	0.506837	-1.12379	1.13383	FKBP8
axon guidance (GO:0007411)	2/159	0.308955	0.474144	-0.961116	1.12889	PTPRM;SPTAN1
IRE1-mediated unfolded protein response (GO:0036498)	1/58	0.336971	0.495441	-1.03566	1.12655	ZBTB17
peptide biosynthetic process (GO:0043043)	2/175	0.35019	0.506239	-1.06819	1.12083	RPL10;RPL22
triglyceride metabolic process (GO:0006641)	1/53	0.313029	0.477781	-0.964413	1.12013	DGAT1
cell chemotaxis (GO:0060326)	1/61	0.350936	0.506239	-1.06837	1.11875	DOCK4
histone H4 acetylation (GO:0043967)	1/48	0.288229	0.456499	-0.894295	1.1125	NAA40
positive regulation of programmed cell death (GO:0043068)	3/258	0.273938	0.449087	-0.858826	1.11205	HTRA2;IP6K2;FGD2
positive regulation of catabolic process (GO:0009896)	1/63	0.360084	0.506821	-1.08637	1.10964	OAZ1
regulation of cellular catabolic process (GO:0031329)	1/56	0.327495	0.489207	-0.993867	1.10944	WDR24
potassium ion transport (GO:0006813)	1/62	0.355526	0.506775	-1.06074	1.09697	KCNK4
positive regulation of cell adhesion (GO:0045785)	1/65	0.369103	0.509714	-1.09964	1.09599	CHRD
negative regulation of transforming growth factor beta receptor signaling pathway (GO:0030512)	1/56	0.327495	0.489207	-0.979282	1.09315	PPM1A
tRNA modification (GO:0006400)	1/58	0.336971	0.495441	-1.00067	1.08849	THUMPD3
synapse assembly (GO:0007416)	1/64	0.364609	0.506837	-1.0746	1.08419	NPAS4
transcription from RNA polymerase II promoter (GO:0006366)	5/486	0.258981	0.442689	-0.794782	1.07375	IRF3;ZC3H8;SRSF6;SRSF7;GABPA
ubiquitin-dependent ERAD pathway (GO:0030433)	1/59	0.341659	0.497981	-0.985417	1.05828	BAG6
tRNA processing (GO:0008033)	1/63	0.360084	0.506821	-1.03031	1.05238	ELAC2
protein autophosphorylation (GO:0046777)	2/176	0.352742	0.506775	-1.00357	1.04574	IRAK1;AURKA
regulation of epithelial cell proliferation (GO:0050678)	1/73	0.403936	0.534977	-1.15287	1.04507	SRSF6
regulation of programmed cell death (GO:0043067)	3/269	0.295013	0.462776	-0.845537	1.03218	MAP4K2;PTGIS;INHA
proteolysis (GO:0006508)	3/292	0.339334	0.496313	-0.950861	1.02766	DPP7;HTRA2;RHBDL3
renal system development (GO:0072001)	1/60	0.346314	0.503022	-0.958677	1.01659	BAG6
glycosaminoglycan metabolic process (GO:0030203)	1/62	0.355526	0.506775	-0.98262	1.01618	NDST2
stress-activated protein kinase signaling cascade (GO:0031098)	1/71	0.395411	0.528031	-1.0906	1.01189	MAP4K2
regulation of angiogenesis (GO:0045765)	2/178	0.357837	0.506821	-0.984056	1.01129	PTGIS;PTPRM
negative regulation of intrinsic apoptotic signaling pathway (GO:2001243)	1/63	0.360084	0.506821	-0.986068	1.00719	HTRA2
cellular response to interleukin-1 (GO:0071347)	2/151	0.288133	0.456499	-0.807646	1.00498	PTGIS;IRAK1
response to insulin (GO:0032868)	1/72	0.399689	0.531865	-1.09394	1.00322	HDAC5
response to reactive oxygen species (GO:0000302)	1/61	0.350936	0.506239	-0.957396	1.00254	PTPRK
muscle organ development (GO:0007517)	1/61	0.350936	0.506239	-0.950264	0.99507	MAPK12
regulation of pathway-restricted SMAD protein phosphorylation (GO:0060393)	1/60	0.346314	0.503022	-0.930477	0.986688	INHA
negative regulation of intracellular signal transduction (GO:1902532)	2/162	0.316735	0.481689	-0.857942	0.986369	PPM1A;PPP2R5C
negative regulation of gene expression (GO:0010629)	6/619	0.271912	0.448301	-0.75647	0.985134	HDAC5;ZGPAT;AEBP2;HDAC10;ZC3H8;PTPRK
positive regulation of protein modification by small protein conjugation or removal (GO:1903322)	1/66	0.373566	0.51251	-0.988279	0.973121	FANCI
histone acetylation (GO:0016573)	1/72	0.399689	0.531865	-1.06036	0.972422	NAA40
DNA damage response, signal transduction by p53 class mediator resulting in cell cycle arrest (GO:0006977)	1/63	0.360084	0.506821	-0.939242	0.959359	AURKA
regulation of proteolysis (GO:0030162)	1/64	0.364609	0.506837	-0.944584	0.953018	BAG6
chloride transport (GO:0006821)	1/74	0.408154	0.535573	-1.06206	0.951725	CLCN2
regulation of cytokinesis (GO:0032465)	1/78	0.42473	0.549536	-1.11101	0.951363	AURKA
regulation of cell proliferation (GO:0042127)	7/741	0.268544	0.447219	-0.723372	0.951046	EIF5A;ZBTB17;HSF1;NAP1L1;PTPRK;PPP2R5C;INHA
homophilic cell adhesion via plasma membrane adhesion molecules (GO:0007156)	1/65	0.369103	0.509714	-0.952263	0.9491	PTPRM
negative regulation of cellular catabolic process (GO:0031330)	1/57	0.33225	0.492808	-0.860633	0.948305	RASIP1
regulation of osteoblast differentiation (GO:0045667)	1/70	0.391104	0.527958	-1.00853	0.946794	CHRD
negative regulation of neuron apoptotic process (GO:0043524)	1/64	0.364609	0.506837	-0.9383	0.946678	NRBP2
cholesterol metabolic process (GO:0008203)	1/69	0.386765	0.527084	-0.995203	0.94538	GGPS1
cellular response to reactive oxygen species (GO:0034614)	1/66	0.373566	0.51251	-0.958679	0.943975	PTPRK
regulation of transforming growth factor beta receptor signaling pathway (GO:0017015)	1/80	0.432845	0.553311	-1.12005	0.937905	PPM1A
regulation of neuron death (GO:1901214)	1/73	0.403936	0.534977	-1.03421	0.937512	HTRA2
cellular protein catabolic process (GO:0044257)	1/63	0.360084	0.506821	-0.915949	0.935567	HTRA2
cellular response to oxygen-containing compound (GO:1901701)	3/275	0.306557	0.473756	-0.788493	0.932275	HTRA2;PTPRK;KCNK4
regulation of TOR signaling (GO:0032006)	1/68	0.382396	0.522919	-0.966906	0.929484	WDR24
negative regulation of cell cycle G2/M phase transition (GO:1902750)	1/70	0.391104	0.527958	-0.989006	0.928462	AURKA
negative regulation of angiogenesis (GO:0016525)	1/70	0.391104	0.527958	-0.981509	0.921423	PTPRM
regulation of mitotic cell cycle (GO:0007346)	2/166	0.327077	0.489207	-0.821268	0.917816	MAP4K2;HSF1
positive regulation of protein polymerization (GO:0032273)	1/65	0.369103	0.509714	-0.917539	0.914492	NAV3
regulation of DNA replication (GO:0006275)	1/62	0.355526	0.506775	-0.882816	0.912971	EHMT2
inorganic anion transmembrane transport (GO:0098661)	1/65	0.369103	0.509714	-0.912625	0.909594	CLCN2
vascular endothelial growth factor receptor signaling pathway (GO:0048010)	1/71	0.395411	0.528031	-0.979312	0.908633	MAPK12
B cell activation (GO:0042113)	1/74	0.408154	0.535573	-1.00971	0.90481	HDAC5
protein transport (GO:0015031)	3/327	0.406317	0.535573	-0.998946	0.899674	ARRDC1;TBC1D10C;RUNDC1
positive regulation of proteasomal protein catabolic process (GO:1901800)	1/74	0.408154	0.535573	-1.00196	0.897867	BAG6
positive regulation of cell projection organization (GO:0031346)	1/64	0.364609	0.506837	-0.887033	0.894953	NAV3
regulation of actin filament polymerization (GO:0030833)	1/69	0.386765	0.527084	-0.941474	0.894341	KANK3
positive regulation of apoptotic signaling pathway (GO:2001235)	1/77	0.42063	0.546754	-1.02799	0.890245	HTRA2
interferon-gamma-mediated signaling pathway (GO:0060333)	1/71	0.395411	0.528031	-0.95572	0.886744	IRF3
fibroblast growth factor receptor signaling pathway (GO:0008543)	1/79	0.428802	0.552255	-1.04681	0.886396	TIAL1
nucleic acid metabolic process (GO:0090304)	1/81	0.436859	0.553311	-1.06863	0.884977	MMS19
regulation of transcription, DNA-templated (GO:0006355)	13/1599	0.337653	0.495577	-0.81345	0.883193	HDAC5;ZGPAT;HDAC10;ZC3H8;RFX1;PTPRK;FOXP4;NPAS4;TIAL1;PPM1A;IRAK1;MMS19;GABPA
nucleic acid-templated transcription (GO:0097659)	1/77	0.42063	0.546754	-1.01687	0.880607	MMS19
lymphocyte differentiation (GO:0030098)	1/74	0.408154	0.535573	-0.977164	0.875647	HDAC5
negative regulation of inflammatory response (GO:0050728)	1/79	0.428802	0.552255	-1.02827	0.870695	PTGIS
negative regulation of mitotic cell cycle phase transition (GO:1901991)	1/80	0.432845	0.553311	-1.03622	0.867705	AURKA
negative regulation of blood vessel morphogenesis (GO:2000181)	1/66	0.373566	0.51251	-0.874104	0.860697	PTPRM
protein homooligomerization (GO:0051260)	2/191	0.390579	0.527958	-0.915356	0.86055	HSF1;HTRA2
MAPK cascade (GO:0000165)	3/279	0.314265	0.478798	-0.740181	0.856774	MAP4K2;HSF1;SPTAN1
positive regulation of JNK cascade (GO:0046330)	1/77	0.42063	0.546754	-0.980975	0.849526	MAP4K2
positive regulation of cell proliferation (GO:0008284)	4/425	0.351889	0.506745	-0.812052	0.848138	EIF5A;HSF1;CHRD;NAP1L1
positive regulation of cellular protein localization (GO:1903829)	1/67	0.377997	0.517744	-0.86548	0.842	OAZ1
snRNA transcription (GO:0009301)	1/71	0.395411	0.528031	-0.905898	0.840518	ZC3H8
proteasome-mediated ubiquitin-dependent protein catabolic process (GO:0043161)	3/292	0.339334	0.496313	-0.764659	0.82642	BAG6;PPP2R5C;AURKA
transforming growth factor beta receptor signaling pathway (GO:0007179)	1/77	0.42063	0.546754	-0.952553	0.824913	PTPRK
anaphase-promoting complex-dependent catabolic process (GO:0031145)	1/80	0.432845	0.553311	-0.980337	0.820911	AURKA
purine ribonucleotide biosynthetic process (GO:0009152)	1/76	0.416501	0.544754	-0.928864	0.813561	PPCDC
signal transduction involved in mitotic G1 DNA damage checkpoint (GO:0072431)	1/64	0.364609	0.506837	-0.804458	0.81164	AURKA
regulation of endothelial cell migration (GO:0010594)	1/70	0.391104	0.527958	-0.863471	0.810611	PTPRM
retrograde transport, endosome to Golgi (GO:0042147)	1/83	0.444804	0.554193	-0.999559	0.809765	TBC1D10C
negative regulation of cellular macromolecule biosynthetic process (GO:2000113)	5/513	0.295494	0.462776	-0.660714	0.80548	HDAC5;ZGPAT;HDAC10;ZC3H8;PTPRK
negative regulation of defense response (GO:0031348)	1/81	0.436859	0.553311	-0.970493	0.803708	PTGIS
NIK/NF-kappaB signaling (GO:0038061)	1/81	0.436859	0.553311	-0.966812	0.800659	IRAK1
regulation of G-protein coupled receptor protein signaling pathway (GO:0008277)	1/75	0.412342	0.540155	-0.902387	0.799426	RGS11
regulation of endothelial cell proliferation (GO:0001936)	1/80	0.432845	0.553311	-0.952335	0.797463	PTPRM
regulation of MAP kinase activity (GO:0043405)	1/88	0.464182	0.564945	-1.02333	0.785383	IRAK1
retrograde vesicle-mediated transport, Golgi to ER (GO:0006890)	1/81	0.436859	0.553311	-0.941622	0.779799	KIF22
Rho protein signal transduction (GO:0007266)	1/73	0.403936	0.534977	-0.854672	0.774759	RHOT2
positive regulation of cell cycle (GO:0045787)	1/83	0.444804	0.554193	-0.949958	0.769581	HSF1
ephrin receptor signaling pathway (GO:0048013)	1/83	0.444804	0.554193	-0.943574	0.76441	DNM1
regulation of cellular response to heat (GO:1900034)	1/79	0.428802	0.552255	-0.886088	0.750304	HSF1
proteolysis involved in cellular protein catabolic process (GO:0051603)	1/94	0.486551	0.579588	-1.03357	0.744602	BAG6
snRNA transcription from RNA polymerase II promoter (GO:0042795)	1/71	0.395411	0.528031	-0.801027	0.743216	ZC3H8
cilium organization (GO:0044782)	2/193	0.395552	0.528031	-0.800106	0.742076	CEP126;CCDC65
cellular response to lipid (GO:0071396)	2/179	0.360379	0.506821	-0.726877	0.74185	HTRA2;KCNK4
mitochondrial translational elongation (GO:0070125)	1/88	0.464182	0.564945	-0.955084	0.733007	MRPL2
mitochondrial translational termination (GO:0070126)	1/90	0.471743	0.570023	-0.97501	0.732544	MRPL2
regulation of cell cycle G2/M phase transition (GO:1902749)	1/85	0.452637	0.556532	-0.922118	0.73093	AURKA
negative regulation of cell cycle process (GO:0010948)	1/82	0.440846	0.554193	-0.888407	0.727659	EHMT2
cellular response to fibroblast growth factor stimulus (GO:0044344)	1/95	0.490187	0.583094	-1.01881	0.726378	TIAL1
positive regulation of protein catabolic process (GO:0045732)	1/82	0.440846	0.554193	-0.883573	0.7237	OAZ1
positive regulation of cytokine production (GO:0001819)	2/221	0.463068	0.564945	-0.93824	0.722334	IRF3;IRAK1
positive regulation of protein ubiquitination (GO:0031398)	1/84	0.448734	0.555105	-0.898723	0.720169	FANCI
positive regulation of GTPase activity (GO:0043547)	2/193	0.395552	0.528031	-0.771629	0.715665	TBC1D10C;RUNDC1
regulation of phosphatidylinositol 3-kinase signaling (GO:0014066)	1/81	0.436859	0.553311	-0.863145	0.714808	PPP2R5C
regulation of cell cycle process (GO:0010564)	1/91	0.475485	0.570446	-0.955706	0.710492	AURKA
regulation of proteasomal ubiquitin-dependent protein catabolic process (GO:0032434)	1/89	0.467976	0.56874	-0.934663	0.709725	BAG6
modulation of chemical synaptic transmission (GO:0050804)	1/83	0.444804	0.554193	-0.874954	0.70882	NPAS4
positive regulation of stress-activated MAPK cascade (GO:0032874)	1/81	0.436859	0.553311	-0.853933	0.70718	MAP4K2
ERAD pathway (GO:0036503)	1/78	0.42473	0.549536	-0.819584	0.70181	BAG6
DNA damage response, signal transduction by p53 class mediator (GO:0030330)	1/83	0.444804	0.554193	-0.865002	0.700757	AURKA
mitotic sister chromatid segregation (GO:0000070)	1/83	0.444804	0.554193	-0.86271	0.6989	KIF22
response to ionizing radiation (GO:0010212)	1/78	0.42473	0.549536	-0.812205	0.695492	USP28
regulation of mitotic nuclear division (GO:0007088)	1/85	0.452637	0.556532	-0.86945	0.689183	AURKA
cellular response to BMP stimulus (GO:0071773)	1/88	0.464182	0.564945	-0.884384	0.678747	INHA
cell-matrix adhesion (GO:0007160)	1/91	0.475485	0.570446	-0.909888	0.67643	PTPRK
antigen processing and presentation of exogenous peptide antigen via MHC class II (GO:0019886)	1/98	0.500945	0.587706	-0.976874	0.675272	KIF22
viral process (GO:0016032)	2/221	0.463068	0.564945	-0.871788	0.671173	RPL10;RPL22
regulation of cell migration (GO:0030334)	3/317	0.387322	0.527084	-0.695231	0.659426	NAV3;CHRD;PTPRK
positive regulation of vasculature development (GO:1904018)	1/105	0.525179	0.605035	-1.01846	0.655903	PTGIS
positive regulation of supramolecular fiber organization (GO:1902905)	1/85	0.452637	0.556532	-0.822713	0.652136	NAV3
antigen processing and presentation of peptide antigen via MHC class II (GO:0002495)	1/99	0.504481	0.588445	-0.952684	0.65185	KIF22
regulation of cytokine-mediated signaling pathway (GO:0001959)	1/91	0.475485	0.570446	-0.870094	0.646846	IRAK1
positive regulation of transmembrane receptor protein serine/threonine kinase signaling pathway (GO:0090100)	1/83	0.444804	0.554193	-0.795143	0.644163	INHA
cellular response to transforming growth factor beta stimulus (GO:0071560)	1/101	0.511478	0.594134	-0.960612	0.644043	PTPRK
antigen processing and presentation of exogenous peptide antigen (GO:0002478)	1/98	0.500945	0.587706	-0.92883	0.642061	KIF22
negative regulation of cellular protein metabolic process (GO:0032269)	1/90	0.471743	0.570023	-0.847917	0.637057	BAG6
protein oligomerization (GO:0051259)	2/218	0.456039	0.559896	-0.807917	0.634358	IRAK1;HSF1
regulation of transcription from RNA polymerase II promoter in response to stress (GO:0043618)	1/94	0.486551	0.579588	-0.877187	0.631938	HSF1
positive regulation of cellular protein metabolic process (GO:0032270)	1/92	0.479199	0.573267	-0.858723	0.63171	PYM1
intracellular protein transport (GO:0006886)	3/348	0.44561	0.554376	-0.777247	0.628257	EIF5A;TBC1D10C;RUNDC1
cellular response to lipopolysaccharide (GO:0071222)	1/92	0.479199	0.573267	-0.853856	0.62813	IRAK1
translational termination (GO:0006415)	1/97	0.497385	0.587501	-0.898231	0.627317	MRPL2
regulation of JNK cascade (GO:0046328)	1/91	0.475485	0.570446	-0.84297	0.626682	MAP4K2
cellular protein localization (GO:0034613)	3/328	0.408207	0.535573	-0.699409	0.626657	TBC1D10C;RUNDC1;PTPRK
regulation of neuron apoptotic process (GO:0043523)	1/90	0.471743	0.570023	-0.828497	0.622466	NRBP2
interleukin-1-mediated signaling pathway (GO:0070498)	1/96	0.493799	0.584908	-0.879613	0.620679	IRAK1
positive regulation of sequence-specific DNA binding transcription factor activity (GO:0051091)	2/216	0.451324	0.556532	-0.765945	0.609363	HDAC5;IRAK1
metal ion transport (GO:0030001)	1/102	0.51494	0.596507	-0.909787	0.603831	KCNK4
positive regulation of cell growth (GO:0030307)	1/99	0.504481	0.588445	-0.882446	0.603792	ITSN2
negative regulation of binding (GO:0051100)	1/83	0.444804	0.554193	-0.743776	0.602549	AURKA
regulation of cysteine-type endopeptidase activity involved in apoptotic process (GO:0043281)	1/94	0.486551	0.579588	-0.83293	0.600055	HTRA2
regulation of translation (GO:0006417)	2/214	0.446586	0.55477	-0.733447	0.591248	RPL10;PYM1
monovalent inorganic cation transport (GO:0015672)	1/105	0.525179	0.605035	-0.913467	0.588288	KCNK4
positive regulation of angiogenesis (GO:0045766)	1/104	0.52179	0.603611	-0.902084	0.586797	PTGIS
glycosaminoglycan biosynthetic process (GO:0006024)	1/100	0.507992	0.591719	-0.863439	0.584798	NDST2
toll-like receptor signaling pathway (GO:0002224)	1/87	0.460361	0.564378	-0.747887	0.58017	IRAK1
Ras protein signal transduction (GO:0007265)	2/224	0.470044	0.570023	-0.763142	0.576119	RHOT2;USP28
negative regulation of cell proliferation (GO:0008285)	3/364	0.474862	0.570446	-0.770119	0.573531	ZBTB17;PTPRK;PPP2R5C
positive regulation of protein metabolic process (GO:0051247)	1/97	0.497385	0.587501	-0.816976	0.570569	OAZ1
regulation of Wnt signaling pathway (GO:0030111)	1/110	0.541769	0.612403	-0.922237	0.565253	PPM1A
translational elongation (GO:0006414)	1/106	0.528544	0.608079	-0.884207	0.563796	MRPL2
mitochondrial translation (GO:0032543)	1/108	0.535203	0.6099	-0.877623	0.54861	MRPL2
regulation of protein ubiquitination (GO:0031396)	1/102	0.51494	0.596507	-0.822032	0.545588	FANCI
positive regulation of epithelial cell proliferation (GO:0050679)	1/108	0.535203	0.6099	-0.87002	0.543857	SRSF6
chromatin remodeling (GO:0006338)	1/117	0.564033	0.626621	-0.94912	0.543506	HDAC5
RNA splicing (GO:0008380)	1/107	0.531885	0.6099	-0.856725	0.540874	SRSF7
nucleotide-excision repair (GO:0006289)	1/109	0.538498	0.61117	-0.861168	0.533039	MMS19
ubiquitin-dependent protein catabolic process (GO:0006511)	3/342	0.434478	0.553311	-0.637542	0.531462	BAG6;ARRDC1;PPP2R5C
cellular response to metal ion (GO:0071248)	1/101	0.511478	0.594134	-0.792622	0.531414	HSF1
response to endoplasmic reticulum stress (GO:0034976)	1/107	0.531885	0.6099	-0.836295	0.527976	BAG6
positive regulation of intracellular signal transduction (GO:1902533)	4/480	0.439442	0.554193	-0.63479	0.521956	PPM1A;IRAK1;MIB2;WDR24
cytosolic transport (GO:0016482)	1/119	0.570195	0.630137	-0.925561	0.519959	TBC1D10C
phosphatidylinositol metabolic process (GO:0046488)	1/113	0.551446	0.620838	-0.871963	0.519002	IP6K2
proteasomal protein catabolic process (GO:0010498)	2/238	0.501875	0.587851	-0.74894	0.516323	BAG6;PPP2R5C
regulation of macroautophagy (GO:0016241)	1/117	0.564033	0.626621	-0.894982	0.512504	NRBP2
regulation of cellular response to stress (GO:0080135)	1/105	0.525179	0.605035	-0.784769	0.505404	HSF1
cellular response to peptide hormone stimulus (GO:0071375)	1/111	0.545018	0.614423	-0.830743	0.504209	HDAC5
cellular protein metabolic process (GO:0044267)	4/485	0.447274	0.554805	-0.616276	0.495846	RPL10;RPL22;MXRA8;HTRA2
regulation of signal transduction (GO:0009966)	2/234	0.492904	0.584672	-0.694767	0.491506	IRAK1;RGS11
activation of protein kinase activity (GO:0032147)	2/234	0.492904	0.584672	-0.690686	0.488619	MAP4K2;IRAK1
response to molecule of bacterial origin (GO:0002237)	1/99	0.504481	0.588445	-0.707414	0.48403	IRAK1
positive regulation of cysteine-type endopeptidase activity involved in apoptotic process (GO:0043280)	1/110	0.541769	0.612403	-0.787718	0.482804	HTRA2
positive regulation of developmental process (GO:0051094)	1/114	0.554626	0.621921	-0.816715	0.481421	SRSF6
Wnt signaling pathway (GO:0016055)	1/110	0.541769	0.612403	-0.784074	0.48057	PPM1A
protein localization to cell periphery (GO:1990778)	1/118	0.567125	0.629225	-0.835716	0.473998	TSPAN14
RNA splicing, via transesterification reactions with bulged adenosine as nucleophile (GO:0000377)	2/237	0.499642	0.587706	-0.676958	0.469717	SRSF6;SRSF7
negative regulation of hydrolase activity (GO:0051346)	1/109	0.538498	0.61117	-0.758195	0.469301	LRCH1
endocytosis (GO:0006897)	2/264	0.557654	0.622825	-0.79887	0.466553	ADORA1;DNM1
regulation of cytokine production (GO:0001817)	1/109	0.538498	0.61117	-0.736782	0.456047	IRF3
inflammatory response (GO:0006954)	2/253	0.534599	0.6099	-0.727703	0.455716	HDAC5;ADORA1
positive regulation of cellular process (GO:0048522)	4/520	0.501053	0.587706	-0.65222	0.450713	EIF5A;HSF1;HTRA2;NAP1L1
positive regulation of neuron projection development (GO:0010976)	1/98	0.500945	0.587706	-0.6496	0.449041	ITSN2
negative regulation of apoptotic process (GO:0043066)	4/486	0.448837	0.555105	-0.5575	0.446611	NRBP2;IRAK1;RPL10;FMN2
negative regulation of cell growth (GO:0030308)	1/116	0.56092	0.625641	-0.763056	0.441181	IP6K2
negative regulation of response to external stimulus (GO:0032102)	1/108	0.535203	0.6099	-0.684497	0.427885	PTGIS
regulation of phosphorylation (GO:0042325)	1/120	0.573243	0.631845	-0.76593	0.426198	INHA
positive regulation of protein serine/threonine kinase activity (GO:0071902)	1/119	0.570195	0.630137	-0.754354	0.423779	IRAK1
negative regulation of growth (GO:0045926)	1/121	0.57627	0.63435	-0.759203	0.418457	IP6K2
cellular response to interferon-gamma (GO:0071346)	1/117	0.564033	0.626621	-0.724897	0.415106	IRF3
cellular response to insulin stimulus (GO:0032869)	1/111	0.545018	0.614423	-0.679603	0.412476	HDAC5
cell cycle G2/M phase transition (GO:0044839)	1/128	0.596869	0.65088	-0.791441	0.408429	AURKA
transmembrane receptor protein tyrosine kinase signaling pathway (GO:0007169)	3/397	0.532847	0.6099	-0.644411	0.40567	TIAL1;DNM1;MAPK12
positive regulation of NF-kappaB transcription factor activity (GO:0051092)	1/129	0.599729	0.652487	-0.789027	0.403411	IRAK1
vesicle organization (GO:0016050)	1/128	0.596869	0.65088	-0.777742	0.40136	DNM1
brain development (GO:0007420)	1/120	0.573243	0.631845	-0.69629	0.387447	BAG6
non-canonical Wnt signaling pathway (GO:0035567)	1/128	0.596869	0.65088	-0.748976	0.386515	PLCB3
regulation of protein phosphorylation (GO:0001932)	2/262	0.553522	0.621512	-0.653033	0.386238	FKBP8;INHA
positive regulation of transcription from RNA polymerase II promoter (GO:0045944)	6/849	0.555979	0.6222	-0.656772	0.385541	NPAS4;ZBTB17;HDAC5;IRF3;HSF1;GABPA
Golgi organization (GO:0007030)	1/122	0.579276	0.636824	-0.700845	0.382645	COG1
cellular response to growth factor stimulus (GO:0071363)	1/140	0.629894	0.677418	-0.819839	0.378932	HTRA2
plasma membrane bounded cell projection organization (GO:0120036)	1/119	0.570195	0.630137	-0.670653	0.376757	PTPRM
protein localization to plasma membrane (GO:0072659)	1/131	0.60539	0.656946	-0.743988	0.373395	TSPAN14
G2/M transition of mitotic cell cycle (GO:0000086)	1/127	0.593988	0.650448	-0.714652	0.372259	AURKA
organic anion transport (GO:0015711)	1/125	0.588166	0.645754	-0.68911	0.365743	MFSD10
generation of neurons (GO:0048699)	1/131	0.60539	0.656946	-0.722411	0.362565	NRBP2
negative regulation of multicellular organismal process (GO:0051241)	1/126	0.591087	0.648115	-0.673461	0.3541	SRSF6
vesicle-mediated transport (GO:0016192)	3/411	0.556355	0.6222	-0.599397	0.351456	TBC1D10C;FMN2;DNM1
mRNA processing (GO:0006397)	2/284	0.597479	0.65088	-0.676931	0.348644	SRSF6;SRSF7
phagocytosis (GO:0006909)	1/136	0.619196	0.669336	-0.72734	0.348639	ADORA1
negative regulation of programmed cell death (GO:0043069)	3/409	0.553039	0.621512	-0.585026	0.346526	IRAK1;RPL10;FMN2
positive regulation of macromolecule biosynthetic process (GO:0010557)	1/143	0.637722	0.682346	-0.759236	0.341545	PYM1
response to lipid (GO:0033993)	1/141	0.632522	0.678509	-0.716731	0.328292	IRAK1
neuron differentiation (GO:0030182)	1/140	0.629894	0.677418	-0.694456	0.32098	NRBP2
positive regulation of cellular biosynthetic process (GO:0031328)	1/160	0.679071	0.71656	-0.810942	0.313859	PYM1
cell-cell adhesion via plasma-membrane adhesion molecules (GO:0098742)	1/143	0.637722	0.682346	-0.694186	0.312282	PTPRM
positive regulation of Wnt signaling pathway (GO:0030177)	1/141	0.632522	0.678509	-0.679824	0.311387	PPM1A
regulation of primary metabolic process (GO:0080090)	1/140	0.629894	0.677418	-0.66925	0.30933	OAZ1
cilium assembly (GO:0060271)	2/289	0.607009	0.657854	-0.614757	0.306894	CEP126;CCDC65
negative regulation of cell differentiation (GO:0045596)	1/151	0.6578	0.698498	-0.731424	0.30636	CHRD
ion transport (GO:0006811)	2/290	0.608895	0.659048	-0.615899	0.305554	WNK4;CLCN2
regulation of G2/M transition of mitotic cell cycle (GO:0010389)	1/150	0.655352	0.696778	-0.704853	0.297858	AURKA
cellular protein complex assembly (GO:0043623)	1/145	0.642848	0.685216	-0.671904	0.296878	CCDC65
protein localization to membrane (GO:0072657)	1/161	0.681352	0.718066	-0.765272	0.293617	TSPAN14
neuron development (GO:0048666)	1/145	0.642848	0.685216	-0.654235	0.289072	PTPRM
response to cytokine (GO:0034097)	1/139	0.627248	0.67717	-0.600206	0.279944	IRAK1
peptidyl-serine phosphorylation (GO:0018105)	1/146	0.645385	0.687049	-0.63673	0.278829	MAPK12
spermatogenesis (GO:0007283)	1/154	0.665042	0.704408	-0.668492	0.272682	BAG6
response to lipopolysaccharide (GO:0032496)	1/156	0.669784	0.707649	-0.679003	0.272144	IRAK1
male gamete generation (GO:0048232)	1/155	0.667421	0.70604	-0.648007	0.262011	BAG6
protein stabilization (GO:0050821)	1/153	0.662645	0.702755	-0.632388	0.260238	BAG6
positive regulation of gene expression (GO:0010628)	5/772	0.63877	0.682599	-0.553327	0.248008	PPM1A;IRAK1;PYM1;MMS19;GABPA
regulation of mitotic cell cycle phase transition (GO:1901990)	1/185	0.731512	0.760447	-0.756328	0.23646	AURKA
positive regulation of protein kinase activity (GO:0045860)	1/173	0.707497	0.739137	-0.680376	0.235424	MAP4K2
receptor-mediated endocytosis (GO:0006898)	1/189	0.739073	0.766413	-0.77332	0.23382	DNM1
negative regulation of protein phosphorylation (GO:0001933)	1/179	0.71976	0.750084	-0.703693	0.231401	FKBP8
positive regulation of hydrolase activity (GO:0051345)	1/173	0.707497	0.739137	-0.661874	0.229022	MAPK12
regulation of protein kinase B signaling (GO:0051896)	1/164	0.688098	0.724268	-0.58893	0.220156	PPP2R5C
DNA-templated transcription, initiation (GO:0006352)	1/187	0.735319	0.763461	-0.686192	0.21097	POLRMT
RNA metabolic process (GO:0016070)	1/192	0.744605	0.77025	-0.715319	0.210948	RNASEH2A
peptidyl-serine modification (GO:0018209)	1/171	0.703293	0.736574	-0.567664	0.199807	MAPK12
positive regulation of MAP kinase activity (GO:0043406)	1/178	0.717752	0.74892	-0.588767	0.195253	IRAK1
organonitrogen compound biosynthetic process (GO:1901566)	1/182	0.725698	0.755337	-0.603837	0.193603	INHA
positive regulation of cell differentiation (GO:0045597)	1/195	0.750021	0.772999	-0.663564	0.190877	MAPK12
central nervous system development (GO:0007417)	1/218	0.787922	0.807116	-0.794527	0.18938	BAG6
RNA processing (GO:0006396)	1/194	0.748228	0.772098	-0.640442	0.185758	SRSF7
positive regulation of nucleic acid-templated transcription (GO:1903508)	3/503	0.692158	0.727631	-0.501772	0.184623	PPM1A;IRAK1;MMS19
neuron projection development (GO:0031175)	1/168	0.696873	0.730761	-0.503394	0.181802	PTPRM
regulation of MAPK cascade (GO:0043408)	1/204	0.765593	0.786158	-0.677086	0.180853	INHA
regulation of inflammatory response (GO:0050727)	1/167	0.694702	0.729394	-0.490034	0.178505	PTGIS
organelle assembly (GO:0070925)	2/377	0.747608	0.772098	-0.575773	0.167479	CEP126;CCDC65
ion transmembrane transport (GO:0034220)	1/220	0.790935	0.809217	-0.703107	0.164907	CLCN2
protein complex assembly (GO:0006461)	1/190	0.74093	0.767392	-0.523201	0.156881	IRAK1
positive regulation of multicellular organismal process (GO:0051240)	1/203	0.763911	0.78539	-0.568606	0.153128	SRSF6
regulation of cell growth (GO:0001558)	1/202	0.762218	0.784608	-0.54896	0.149055	IP6K2
endosomal transport (GO:0016197)	1/230	0.805372	0.819997	-0.6308	0.136538	TBC1D10C
mitotic cell cycle phase transition (GO:0044772)	1/222	0.793905	0.811268	-0.570054	0.131564	AURKA
protein modification by small protein conjugation (GO:0032446)	2/399	0.775269	0.795124	-0.468948	0.119368	ARRDC1;MIB2
extracellular matrix organization (GO:0030198)	1/230	0.805372	0.819997	-0.533434	0.115462	PXDN
axonogenesis (GO:0007409)	1/224	0.796833	0.813272	-0.502966	0.114229	SPTAN1
protein deubiquitination (GO:0016579)	1/258	0.840739	0.851882	-0.644474	0.111799	USP28
cytokine-mediated signaling pathway (GO:0019221)	3/634	0.828498	0.841506	-0.585417	0.110141	IRF3;IRAK1;IP6K2
protein modification by small protein removal (GO:0070646)	1/262	0.845241	0.855412	-0.613749	0.103192	USP28
nervous system development (GO:0007399)	2/456	0.835002	0.847089	-0.523123	0.0943298	NAV3;ADORA1
positive regulation of macromolecule metabolic process (GO:0010604)	1/277	0.861025	0.870214	-0.548376	0.0820542	GABPA
regulation of cellular macromolecule biosynthetic process (GO:2000112)	3/632	0.826877	0.840875	-0.414545	0.0788048	RPL10;HDAC10;EHMT2
negative regulation of signal transduction (GO:0009968)	1/284	0.867834	0.87407	-0.554775	0.0786422	ARRDC1
protein polyubiquitination (GO:0000209)	1/284	0.867834	0.87407	-0.529452	0.0750526	MIB2
regulation of gene expression (GO:0010468)	5/1038	0.861936	0.870214	-0.489896	0.0727861	SRPK3;HDAC5;HDAC10;MAPK12;GABPA
positive regulation of MAPK cascade (GO:0043410)	1/290	0.873405	0.878629	-0.482927	0.0653669	IRAK1
protein ubiquitination (GO:0016567)	2/507	0.875951	0.880137	-0.462351	0.061236	ARRDC1;MIB2
post-translational protein modification (GO:0043687)	1/358	0.92237	0.925672	-0.534168	0.0431656	MXRA8
transmembrane transport (GO:0055085)	1/379	0.933275	0.935499	-0.588245	0.0406218	CLCN2
positive regulation of protein phosphorylation (GO:0001934)	1/413	0.947796	0.948924	-0.470062	0.025203	INHA
regulation of nucleic acid-templated transcription (GO:1903506)	1/608	0.987329	0.987329	-0.4735	0.00603798	HDAC10

## Sheet: MAJIQ Liver (Adar1 KO)
Term	Overlap	P-value	Adjusted P-value	Z-score	Combined Score	Genes
membrane protein ectodomain proteolysis (GO:0006509)	2/19	0.000979113	0.136997	-2.13079	14.7639	BACE1;ERAP1
nuclear-transcribed mRNA catabolic process, deadenylation-dependent decay (GO:0000288)	3/64	0.00051836	0.136997	-1.82807	13.829	EIF4A2;HBS1L;SKIV2L
positive regulation of protein acetylation (GO:1901985)	1/7	0.017027	0.193329	-3.20943	13.0718	ARNTL
adherens junction assembly (GO:0034333)	1/8	0.0194361	0.193329	-3.18848	12.5646	VCL
cellular iron ion homeostasis (GO:0006879)	2/57	0.0086127	0.193329	-2.63432	12.5249	MT-RNR2;HFE2
protein autoprocessing (GO:0016540)	1/10	0.024237	0.193329	-3.26178	12.1334	HFE2
antigen processing and presentation of endogenous peptide antigen (GO:0002483)	1/7	0.017027	0.193329	-2.96402	12.0723	ERAP1
cellular macromolecular complex assembly (GO:0034622)	2/35	0.00332277	0.136997	-2.04915	11.6944	FGA;DNAJB14
negative regulation of glucocorticoid receptor signaling pathway (GO:2000323)	1/7	0.017027	0.193329	-2.8572	11.6373	ARNTL
exit from host cell (GO:0035891)	1/7	0.017027	0.193329	-2.83526	11.5479	IST1
positive regulation of ER-associated ubiquitin-dependent protein catabolic process (GO:1903071)	1/8	0.0194361	0.193329	-2.87825	11.3421	HERPUD1
regulation of glucocorticoid receptor signaling pathway (GO:2000322)	1/8	0.0194361	0.193329	-2.8668	11.297	ARNTL
ethanol catabolic process (GO:0006068)	1/8	0.0194361	0.193329	-2.8185	11.1067	SULT2A1
regulation of skeletal muscle cell differentiation (GO:2001014)	1/10	0.024237	0.193329	-2.96648	11.0349	ARNTL
antigen processing and presentation of peptide antigen via MHC class I (GO:0002474)	2/29	0.00228863	0.136997	-1.73905	10.5731	ERAP1;IFI30
platelet aggregation (GO:0070527)	2/34	0.00313779	0.136997	-1.78579	10.2937	FGA;VCL
regulation of type B pancreatic cell development (GO:2000074)	1/9	0.0218395	0.193329	-2.67178	10.217	ARNTL
regulation of protein acetylation (GO:1901983)	1/10	0.024237	0.193329	-2.67886	9.96504	ARNTL
primary alcohol catabolic process (GO:0034310)	1/11	0.0266289	0.193329	-2.72788	9.89063	SULT2A1
UV-damage excision repair (GO:0070914)	1/12	0.0290149	0.193329	-2.77982	9.8404	DDB2
nuclear-transcribed mRNA catabolic process, exonucleolytic, 3'-5' (GO:0034427)	1/10	0.024237	0.193329	-2.62737	9.77348	SKIV2L
histidine catabolic process (GO:0006548)	1/9	0.0218395	0.193329	-2.53053	9.67685	FTCD
positive regulation of skeletal muscle tissue development (GO:0048643)	1/13	0.0313953	0.193329	-2.77655	9.60991	ARNTL
stress-induced premature senescence (GO:0090400)	1/9	0.0218395	0.193329	-2.51176	9.60507	ARNTL
proteolysis (GO:0006508)	4/292	0.00562982	0.179642	-1.85043	9.58462	BACE1;NLN;CAPN7;ERAP1
histidine metabolic process (GO:0006547)	1/9	0.0218395	0.193329	-2.4949	9.54059	FTCD
ethanol metabolic process (GO:0006067)	1/8	0.0194361	0.193329	-2.3567	9.28686	SULT2A1
regulation of ER-associated ubiquitin-dependent protein catabolic process (GO:1903069)	1/10	0.024237	0.193329	-2.48712	9.25177	HERPUD1
adipose tissue development (GO:0060612)	1/10	0.024237	0.193329	-2.48589	9.24719	ARID5B
homotypic cell-cell adhesion (GO:0034109)	2/39	0.00411238	0.144344	-1.68263	9.24398	FGA;VCL
imidazole-containing compound catabolic process (GO:0052805)	1/9	0.0218395	0.193329	-2.38763	9.13038	FTCD
nerve growth factor signaling pathway (GO:0038180)	1/11	0.0266289	0.193329	-2.498	9.05714	KIDINS220
viral release from host cell (GO:0019076)	1/7	0.017027	0.193329	-2.20321	8.97359	IST1
positive regulation of circadian rhythm (GO:0042753)	1/11	0.0266289	0.193329	-2.44231	8.85523	ARNTL
exonucleolytic nuclear-transcribed mRNA catabolic process involved in deadenylation-dependent decay (GO:0043928)	2/34	0.00313779	0.136997	-1.53444	8.84488	HBS1L;SKIV2L
RNA metabolic process (GO:0016070)	3/192	0.0116083	0.193329	-1.98264	8.83469	HNRNPL;EIF4A2;SKIV2L
nuclear-transcribed mRNA catabolic process, exonucleolytic (GO:0000291)	2/36	0.00351275	0.136997	-1.53562	8.67834	HBS1L;SKIV2L
ESCRT complex disassembly (GO:1904896)	1/11	0.0266289	0.193329	-2.31209	8.3831	IST1
ESCRT III complex disassembly (GO:1904903)	1/11	0.0266289	0.193329	-2.29132	8.30779	IST1
sulfation (GO:0051923)	1/13	0.0313953	0.193329	-2.39567	8.29166	SULT2A1
membrane protein proteolysis (GO:0033619)	2/36	0.00351275	0.136997	-1.44907	8.18919	BACE1;ERAP1
endoplasmic reticulum to cytosol transport (GO:1903513)	1/17	0.0408596	0.195499	-2.48893	7.95864	HERPUD1
regulation of epithelial cell differentiation (GO:0030856)	1/19	0.0455577	0.195499	-2.56244	7.9148	ARNTL
peptide metabolic process (GO:0006518)	3/105	0.00217383	0.136997	-1.27671	7.82786	BACE1;NLN;ERAP1
positive regulation of ERAD pathway (GO:1904294)	1/14	0.0337699	0.195499	-2.30808	7.8202	HERPUD1
amyloid-beta metabolic process (GO:0050435)	1/15	0.0361388	0.195499	-2.35374	7.81533	BACE1
positive regulation of vasoconstriction (GO:0045907)	1/16	0.038502	0.195499	-2.39241	7.79219	FGA
regulation of peptide hormone secretion (GO:0090276)	2/74	0.0141962	0.193329	-1.82388	7.76023	FGA;ARNTL
negative regulation of endoplasmic reticulum stress-induced intrinsic apoptotic signaling pathway (GO:1902236)	1/15	0.0361388	0.195499	-2.3003	7.63788	HERPUD1
plasminogen activation (GO:0031639)	1/13	0.0313953	0.193329	-2.19527	7.59804	FGA
regulation of cell development (GO:0060284)	1/21	0.0502333	0.195499	-2.53961	7.59616	ARNTL
endoplasmic reticulum calcium ion homeostasis (GO:0032469)	1/19	0.0455577	0.195499	-2.43079	7.50815	HERPUD1
positive regulation of heterotypic cell-cell adhesion (GO:0034116)	1/12	0.0290149	0.193329	-2.09903	7.43046	FGA
purine ribonucleoside bisphosphate metabolic process (GO:0034035)	1/20	0.0478983	0.195499	-2.4125	7.33081	SULT2A1
protein exit from endoplasmic reticulum (GO:0032527)	1/20	0.0478983	0.195499	-2.3624	7.17857	HERPUD1
fibrinolysis (GO:0042730)	1/17	0.0408596	0.195499	-2.22663	7.1199	FGA
iron ion homeostasis (GO:0055072)	2/64	0.0107615	0.193329	-1.56262	7.08142	MT-RNR2;HFE2
retrograde protein transport, ER to cytosol (GO:0030970)	1/19	0.0455577	0.195499	-2.23672	6.90873	HERPUD1
organonitrogen compound catabolic process (GO:1901565)	2/57	0.0086127	0.193329	-1.45156	6.90145	BACE1;ERAP1
histone H2A monoubiquitination (GO:0035518)	1/18	0.0432115	0.195499	-2.17809	6.84279	DDB2
nuclear-transcribed mRNA catabolic process, nonsense-mediated decay (GO:0000184)	2/113	0.0313148	0.193329	-1.9367	6.70808	SMG1;SKIV2L
positive regulation of substrate adhesion-dependent cell spreading (GO:1900026)	1/28	0.0664219	0.205939	-2.46546	6.68566	FGA
activin receptor signaling pathway (GO:0032924)	1/20	0.0478983	0.195499	-2.17476	6.60838	HFE2
regulation of hair cycle (GO:0042634)	1/10	0.024237	0.193329	-1.75653	6.53407	ARNTL
hepaticobiliary system development (GO:0061008)	1/22	0.0525627	0.195499	-2.20852	6.50574	ARID5B
peptide catabolic process (GO:0043171)	1/26	0.0618244	0.195499	-2.31568	6.44561	ERAP1
histone H2A ubiquitination (GO:0033522)	1/18	0.0432115	0.195499	-2.04026	6.40979	DDB2
regulated exocytosis (GO:0045055)	2/149	0.0516302	0.195499	-2.15296	6.38061	FGA;VCL
cellular amide metabolic process (GO:0043603)	2/63	0.0104414	0.193329	-1.39685	6.37239	NLN;FTCD
glutamine family amino acid catabolic process (GO:0009065)	1/17	0.0408596	0.195499	-1.99238	6.37087	ASPG
positive regulation of hormone secretion (GO:0046887)	1/18	0.0432115	0.195499	-1.97696	6.21091	FGA
regulation of cell aging (GO:0090342)	1/14	0.0337699	0.195499	-1.83292	6.21026	ARNTL
morphogenesis of an epithelium (GO:0002009)	1/20	0.0478983	0.195499	-2.0208	6.14055	VCL
regulation of endoplasmic reticulum stress-induced intrinsic apoptotic signaling pathway (GO:1902235)	1/21	0.0502333	0.195499	-2.02282	6.0504	HERPUD1
aspartate family amino acid catabolic process (GO:0009068)	1/20	0.0478983	0.195499	-1.98652	6.03639	ASPG
transition metal ion homeostasis (GO:0055076)	1/25	0.0595173	0.195499	-2.11183	5.95851	HFE2
liver development (GO:0001889)	1/32	0.0755508	0.205949	-2.30548	5.95494	ARID5B
cellular transition metal ion homeostasis (GO:0046916)	2/94	0.0222735	0.193329	-1.56057	5.93695	MT-RNR2;HFE2
oxoacid metabolic process (GO:0043436)	1/33	0.0778193	0.205949	-2.31713	5.91649	SULT2A1
regulation of heterotypic cell-cell adhesion (GO:0034114)	1/20	0.0478983	0.195499	-1.94207	5.90133	FGA
epithelial cell-cell adhesion (GO:0090136)	1/12	0.0290149	0.193329	-1.66519	5.89467	VCL
folic acid-containing compound metabolic process (GO:0006760)	1/24	0.0572047	0.195499	-2.00818	5.74564	FTCD
nucleotide-excision repair, preincision complex stabilization (GO:0006293)	1/22	0.0525627	0.195499	-1.94209	5.7209	DDB2
phosphatidylethanolamine biosynthetic process (GO:0006646)	1/16	0.038502	0.195499	-1.74785	5.69282	ETNK1
regulation of cellular senescence (GO:2000772)	1/25	0.0595173	0.195499	-2.01628	5.68891	ARNTL
cell-matrix adhesion (GO:0007160)	2/91	0.020964	0.193329	-1.46779	5.67294	FGA;VCL
phosphatidylethanolamine metabolic process (GO:0046337)	1/21	0.0502333	0.195499	-1.88385	5.63475	ETNK1
histone monoubiquitination (GO:0010390)	1/25	0.0595173	0.195499	-1.97738	5.57915	DDB2
PERK-mediated unfolded protein response (GO:0036499)	1/13	0.0313953	0.193329	-1.58934	5.50087	HERPUD1
positive regulation of cellular protein metabolic process (GO:0032270)	2/92	0.0213968	0.193329	-1.4304	5.4992	IST1;ASPSCR1
negative regulation of response to endoplasmic reticulum stress (GO:1903573)	1/23	0.0548865	0.195499	-1.8906	5.48744	HERPUD1
nucleotide-excision repair, DNA incision, 5'-to lesion (GO:0006296)	1/38	0.0890804	0.209847	-2.26161	5.46907	DDB2
nucleotide-excision repair, DNA damage recognition (GO:0000715)	1/24	0.0572047	0.195499	-1.90073	5.43823	DDB2
nucleotide-excision repair, DNA duplex unwinding (GO:0000717)	1/23	0.0548865	0.195499	-1.84766	5.3628	DDB2
positive regulation of blood circulation (GO:1903524)	1/24	0.0572047	0.195499	-1.871	5.35316	FGA
negative regulation of transferase activity (GO:0051348)	1/31	0.0732768	0.205939	-2.04086	5.33382	EIF4A2
nucleotide-excision repair, DNA incision, 3'-to lesion (GO:0006295)	1/23	0.0548865	0.195499	-1.79854	5.22024	DDB2
chaperone mediated protein folding requiring cofactor (GO:0051085)	1/25	0.0595173	0.195499	-1.83889	5.18842	DNAJB14
positive regulation of exocytosis (GO:0045921)	1/35	0.08234	0.205949	-2.0459	5.1084	FGA
negative regulation of endothelial cell apoptotic process (GO:2000352)	1/25	0.0595173	0.195499	-1.78591	5.03893	FGA
protein localization to cell surface (GO:0034394)	1/23	0.0548865	0.195499	-1.73288	5.02966	VCL
regulation of cellular response to stress (GO:0080135)	2/105	0.0273545	0.193329	-1.39371	5.01579	SMG1;ARNTL
lamellipodium assembly (GO:0030032)	1/24	0.0572047	0.195499	-1.74015	4.97879	VCL
global genome nucleotide-excision repair (GO:0070911)	1/33	0.0778193	0.205949	-1.91425	4.88778	DDB2
regulation of chromosome organization (GO:0033044)	1/25	0.0595173	0.195499	-1.70679	4.8157	SMG1
lamellipodium organization (GO:0097581)	1/26	0.0618244	0.195499	-1.72871	4.81179	VCL
nucleotide-excision repair, preincision complex assembly (GO:0006294)	1/30	0.0709973	0.205939	-1.81449	4.79953	DDB2
cellular response to nerve growth factor stimulus (GO:1990090)	1/23	0.0548865	0.195499	-1.64146	4.76433	KIDINS220
alpha-amino acid catabolic process (GO:1901606)	1/40	0.0935471	0.214115	-2.00046	4.73966	FTCD
neurotrophin signaling pathway (GO:0038179)	1/18	0.0432115	0.195499	-1.49522	4.69744	KIDINS220
coenzyme metabolic process (GO:0006732)	1/52	0.1199	0.236431	-2.18356	4.63155	FTCD
negative regulation of epithelial cell apoptotic process (GO:1904036)	1/30	0.0709973	0.205939	-1.73461	4.58823	FGA
secondary alcohol biosynthetic process (GO:1902653)	1/37	0.086839	0.205949	-1.87496	4.58185	HSD17B7
ceramide biosynthetic process (GO:0046513)	1/33	0.0778193	0.205949	-1.78744	4.56399	CERS6
cellular macromolecule catabolic process (GO:0044265)	1/49	0.113383	0.22872	-2.09064	4.5513	SKIV2L
platelet degranulation (GO:0002576)	2/125	0.0376503	0.195499	-1.38495	4.54183	FGA;VCL
regulation of telomere maintenance (GO:0032204)	1/26	0.0618244	0.195499	-1.62602	4.52596	SMG1
apical junction assembly (GO:0043297)	1/36	0.0845922	0.205949	-1.8165	4.4866	VCL
regulation of protein modification process (GO:0031399)	1/43	0.100207	0.218463	-1.94543	4.47551	ASPSCR1
monocarboxylic acid catabolic process (GO:0072329)	1/26	0.0618244	0.195499	-1.60747	4.47432	ASPG
activation of MAPKK activity (GO:0000186)	1/34	0.0800824	0.205949	-1.75862	4.43999	KIDINS220
negative regulation of intracellular steroid hormone receptor signaling pathway (GO:0033144)	1/29	0.0687124	0.205939	-1.65145	4.42231	ARNTL
regulation of protein secretion (GO:0050708)	2/108	0.0288141	0.193329	-1.22992	4.36241	FGA;ARNTL
cellular amino acid biosynthetic process (GO:0008652)	1/29	0.0687124	0.205939	-1.6263	4.35496	ASPG
regulation of extrinsic apoptotic signaling pathway via death domain receptors (GO:1902041)	1/40	0.0935471	0.214115	-1.82646	4.32742	FGA
antibacterial humoral response (GO:0019731)	1/36	0.0845922	0.205949	-1.75172	4.3266	FGA
nuclear-transcribed mRNA poly(A) tail shortening (GO:0000289)	1/30	0.0709973	0.205939	-1.61408	4.26941	EIF4A2
regulation of vasoconstriction (GO:0019229)	1/30	0.0709973	0.205939	-1.61258	4.26546	FGA
regulation of endothelial cell apoptotic process (GO:2000351)	1/36	0.0845922	0.205949	-1.71383	4.23302	FGA
cellular response to growth factor stimulus (GO:0071363)	2/140	0.0461938	0.195499	-1.3679	4.20615	KIDINS220;HFE2
regulation of nervous system development (GO:0051960)	1/26	0.0618244	0.195499	-1.50839	4.19853	ARNTL
macromolecular complex assembly (GO:0065003)	2/121	0.0354874	0.195499	-1.25478	4.18919	FGA;DNAJB14
macromolecule catabolic process (GO:0009057)	1/35	0.08234	0.205949	-1.66378	4.15428	BACE1
RNA catabolic process (GO:0006401)	1/44	0.102416	0.219195	-1.81165	4.12823	SKIV2L
multivesicular body assembly (GO:0036258)	1/31	0.0732768	0.205939	-1.57857	4.12562	IST1
protein polymerization (GO:0051258)	1/46	0.106819	0.223175	-1.83581	4.10602	FGA
negative regulation of fat cell differentiation (GO:0045599)	1/33	0.0778193	0.205949	-1.60568	4.09989	ARNTL
cholesterol biosynthetic process (GO:0006695)	1/36	0.0845922	0.205949	-1.6525	4.08152	HSD17B7
'de novo' posttranslational protein folding (GO:0051084)	1/31	0.0732768	0.205939	-1.5616	4.08126	DNAJB14
connective tissue development (GO:0061448)	1/31	0.0732768	0.205939	-1.55708	4.06945	ARID5B
DNA duplex unwinding (GO:0032508)	1/42	0.0979922	0.216322	-1.74936	4.06354	DDB2
lipid phosphorylation (GO:0046834)	1/36	0.0845922	0.205949	-1.63579	4.04026	SMG1
phosphatidylinositol phosphorylation (GO:0046854)	1/28	0.0664219	0.205939	-1.48594	4.02946	SMG1
carboxylic acid metabolic process (GO:0019752)	1/34	0.0800824	0.205949	-1.59278	4.02129	FTCD
negative regulation of extrinsic apoptotic signaling pathway via death domain receptors (GO:1902042)	1/32	0.0755508	0.205949	-1.5475	3.99712	FGA
autophagosome organization (GO:1905037)	1/57	0.130657	0.247895	-1.96157	3.99215	ATG101
multivesicular body organization (GO:0036257)	1/32	0.0755508	0.205949	-1.54052	3.97909	IST1
3'-phosphoadenosine 5'-phosphosulfate metabolic process (GO:0050427)	1/26	0.0618244	0.195499	-1.4137	3.93498	SULT2A1
ceramide metabolic process (GO:0006672)	1/43	0.100207	0.218463	-1.68722	3.88148	CERS6
regulation of DNA metabolic process (GO:0051052)	1/47	0.109012	0.225078	-1.72396	3.82081	SMG1
sterol biosynthetic process (GO:0016126)	1/41	0.0957723	0.214115	-1.60386	3.7623	HSD17B7
regulation of substrate adhesion-dependent cell spreading (GO:1900024)	1/42	0.0979922	0.216322	-1.61731	3.75679	FGA
zymogen activation (GO:0031638)	1/37	0.086839	0.205949	-1.53407	3.74881	FGA
regulation of epithelial cell migration (GO:0010632)	1/49	0.113383	0.22872	-1.72114	3.74689	CAPN7
regulation of exocytosis (GO:0017157)	1/52	0.1199	0.236431	-1.74513	3.70159	FGA
adherens junction organization (GO:0034332)	1/45	0.10462	0.21989	-1.61708	3.65044	VCL
regulation of response to DNA damage stimulus (GO:2001020)	1/37	0.086839	0.205949	-1.47379	3.6015	SMG1
positive regulation of peptide secretion (GO:0002793)	1/36	0.0845922	0.205949	-1.4513	3.58459	FGA
regulation of alternative mRNA splicing, via spliceosome (GO:0000381)	1/40	0.0935471	0.214115	-1.50719	3.57097	HNRNPL
positive regulation of peptide hormone secretion (GO:0090277)	1/40	0.0935471	0.214115	-1.49233	3.53576	FGA
negative regulation of intracellular signal transduction (GO:1902532)	2/162	0.0598644	0.195499	-1.25532	3.53457	ARNTL;HERPUD1
positive regulation of secretion by cell (GO:1903532)	1/53	0.122062	0.236705	-1.67942	3.53221	FGA
negative regulation of apoptotic signaling pathway (GO:2001234)	1/66	0.149697	0.262718	-1.84811	3.50982	HERPUD1
membrane lipid biosynthetic process (GO:0046467)	1/61	0.13917	0.254421	-1.77077	3.49206	CERS6
positive regulation of cell-cell adhesion (GO:0022409)	1/34	0.0800824	0.205949	-1.36598	3.44868	FGA
negative regulation of blood coagulation (GO:0030195)	1/37	0.086839	0.205949	-1.4015	3.42484	FGA
nucleobase-containing compound catabolic process (GO:0034655)	1/44	0.102416	0.219195	-1.49179	3.39937	SKIV2L
negative regulation of TOR signaling (GO:0032007)	1/41	0.0957723	0.214115	-1.44693	3.39419	ARNTL
positive regulation of proteolysis (GO:0045862)	1/53	0.122062	0.236705	-1.61309	3.39269	IST1
RNA secondary structure unwinding (GO:0010501)	1/47	0.109012	0.225078	-1.52605	3.38218	EIF4A2
response to unfolded protein (GO:0006986)	1/44	0.102416	0.219195	-1.47265	3.35576	HERPUD1
nucleotide-excision repair, DNA incision (GO:0033683)	1/41	0.0957723	0.214115	-1.42121	3.33385	DDB2
carboxylic acid biosynthetic process (GO:0046394)	1/45	0.10462	0.21989	-1.45332	3.28076	ASPG
cellular response to UV (GO:0034644)	1/68	0.153872	0.264751	-1.75224	3.27954	DDB2
regulation of immune effector process (GO:0002697)	1/115	0.246408	0.330042	-2.32785	3.26077	CFI
purine ribonucleotide metabolic process (GO:0009150)	1/67	0.151787	0.263749	-1.72859	3.25888	SULT2A1
regulation of translational initiation (GO:0006446)	1/63	0.143396	0.256638	-1.67139	3.24607	EIF4A2
regulation of mRNA splicing, via spliceosome (GO:0048024)	1/61	0.13917	0.254421	-1.61952	3.19379	HNRNPL
amide biosynthetic process (GO:0043604)	1/45	0.10462	0.21989	-1.38312	3.12229	CERS6
nuclear-transcribed mRNA catabolic process (GO:0000956)	2/175	0.0685183	0.205939	-1.15884	3.10646	EIF4A2;SMG1
regulation of intrinsic apoptotic signaling pathway (GO:2001242)	1/48	0.1112	0.228253	-1.41338	3.10438	HERPUD1
organonitrogen compound biosynthetic process (GO:1901566)	2/182	0.0733403	0.205939	-1.15647	3.02143	CERS6;ASPG
pattern recognition receptor signaling pathway (GO:0002221)	1/49	0.113383	0.22872	-1.38023	3.00474	FGA
chromosome organization (GO:0051276)	1/57	0.130657	0.247895	-1.45487	2.96093	DDB2
response to light stimulus (GO:0009416)	1/59	0.134924	0.250573	-1.45187	2.90817	DDB2
gene expression (GO:0010467)	3/412	0.0798795	0.205949	-1.13758	2.87493	HNRNPL;HBS1L;SMG1
protein autoubiquitination (GO:0051865)	1/50	0.11556	0.230511	-1.32191	2.85264	DDB2
vesicle coating (GO:0006901)	1/64	0.145501	0.256638	-1.47616	2.8454	SEC23IP
positive regulation of cell-substrate adhesion (GO:0010811)	1/53	0.122062	0.236705	-1.35265	2.84494	FGA
positive regulation of protein modification process (GO:0031401)	2/164	0.0611693	0.195499	-1.00465	2.8071	ASPSCR1;ARNTL
autophagosome assembly (GO:0000045)	1/59	0.134924	0.250573	-1.38587	2.77596	ATG101
positive regulation of protein transport (GO:0051222)	1/57	0.130657	0.247895	-1.36108	2.77003	FGA
positive regulation of protein complex assembly (GO:0031334)	1/89	0.196517	0.296041	-1.66922	2.71583	DDB2
DNA repair (GO:0006281)	2/289	0.157724	0.266323	-1.44194	2.66314	SMG1;DDB2
regulation of humoral immune response (GO:0002920)	1/114	0.244546	0.330042	-1.86154	2.6217	CFI
negative regulation of nucleic acid-templated transcription (GO:1903507)	3/445	0.0953349	0.214115	-1.09945	2.58409	EIF4A2;ARID5B;ARNTL
antigen processing and presentation of exogenous peptide antigen via MHC class II (GO:0019886)	1/98	0.214143	0.313402	-1.65193	2.5458	IFI30
positive regulation of cell morphogenesis involved in differentiation (GO:0010770)	1/59	0.134924	0.250573	-1.26058	2.525	FGA
vesicle targeting, rough ER to cis-Golgi (GO:0048207)	1/64	0.145501	0.256638	-1.30365	2.51287	SEC23IP
cell junction assembly (GO:0034329)	1/60	0.13705	0.253181	-1.26067	2.50547	VCL
regulation of protein activation cascade (GO:2000257)	1/109	0.235171	0.324653	-1.70713	2.47097	CFI
antigen processing and presentation of exogenous peptide antigen (GO:0002478)	1/98	0.214143	0.313402	-1.58977	2.45002	IFI30
positive regulation of proteasomal ubiquitin-dependent protein catabolic process (GO:0032436)	1/71	0.160097	0.266323	-1.33517	2.446	HERPUD1
positive regulation of canonical Wnt signaling pathway (GO:0090263)	1/114	0.244546	0.330042	-1.73498	2.44346	ARNTL
regulation of neurogenesis (GO:0050767)	1/58	0.132793	0.250573	-1.1993	2.42134	ARNTL
fat cell differentiation (GO:0045444)	1/56	0.128516	0.247852	-1.17445	2.40962	ERAP1
antigen processing and presentation of peptide antigen via MHC class II (GO:0002495)	1/99	0.216078	0.313402	-1.56039	2.3907	IFI30
nucleic acid metabolic process (GO:0090304)	1/81	0.180526	0.282878	-1.38749	2.37523	HNRNPL
negative regulation of intrinsic apoptotic signaling pathway (GO:2001243)	1/63	0.143396	0.256638	-1.22228	2.37384	HERPUD1
COPII vesicle coating (GO:0048208)	1/64	0.145501	0.256638	-1.23044	2.37175	SEC23IP
BMP signaling pathway (GO:0030509)	1/82	0.182542	0.283505	-1.38856	2.36162	HFE2
cellular response to oxidative stress (GO:0034599)	1/116	0.248265	0.330042	-1.67372	2.33193	ARNTL
cellular response to BMP stimulus (GO:0071773)	1/88	0.194535	0.294319	-1.4103	2.30885	HFE2
cholesterol metabolic process (GO:0008203)	1/69	0.155952	0.265724	-1.24027	2.30467	HSD17B7
COPII-coated vesicle budding (GO:0090114)	1/69	0.155952	0.265724	-1.23328	2.29169	SEC23IP
regulation of proteolysis (GO:0030162)	1/64	0.145501	0.256638	-1.1877	2.28938	IST1
steroid metabolic process (GO:0008202)	1/100	0.218008	0.313807	-1.4925	2.27341	SULT2A1
epithelium development (GO:0060429)	1/116	0.248265	0.330042	-1.63051	2.27172	VCL
regulation of innate immune response (GO:0045088)	1/70	0.158027	0.266323	-1.22246	2.25543	ERAP1
regulation of TOR signaling (GO:0032006)	1/68	0.153872	0.264751	-1.19673	2.23984	ARNTL
cellular protein metabolic process (GO:0044267)	3/485	0.115584	0.230511	-1.034	2.23113	BACE1;FGA;HBS1L
nucleic acid phosphodiester bond hydrolysis (GO:0090305)	1/74	0.166278	0.272727	-1.23787	2.22086	DDB2
positive regulation of epithelial cell migration (GO:0010634)	1/75	0.168328	0.274805	-1.22689	2.18613	CAPN7
interferon-gamma-mediated signaling pathway (GO:0060333)	1/71	0.160097	0.266323	-1.19109	2.18205	IFI30
sphingolipid biosynthetic process (GO:0030148)	1/67	0.151787	0.263749	-1.15344	2.17455	CERS6
mRNA-containing ribonucleoprotein complex export from nucleus (GO:0071427)	1/101	0.219933	0.313807	-1.43145	2.16783	SMG1
cellular response to interferon-gamma (GO:0071346)	1/117	0.250117	0.330042	-1.5568	2.15745	IFI30
positive regulation of cell projection organization (GO:0031346)	1/64	0.145501	0.256638	-1.10783	2.13542	KIDINS220
gland development (GO:0048732)	1/76	0.170373	0.275581	-1.20129	2.12599	ARID5B
activation of GTPase activity (GO:0090630)	1/85	0.18856	0.290284	-1.27397	2.12541	ARHGAP42
response to metal ion (GO:0010038)	1/73	0.164223	0.27062	-1.17647	2.12534	FGA
protein-DNA complex assembly (GO:0065004)	1/92	0.202435	0.303653	-1.28752	2.05661	DDB2
regulation of fat cell differentiation (GO:0045598)	1/73	0.164223	0.27062	-1.12109	2.02529	ARNTL
cytoskeleton-dependent cytokinesis (GO:0061640)	1/71	0.160097	0.266323	-1.10513	2.02457	IST1
transmembrane receptor protein serine/threonine kinase signaling pathway (GO:0007178)	1/145	0.300209	0.374995	-1.67101	2.01068	HFE2
protein catabolic process (GO:0030163)	1/82	0.182542	0.283505	-1.18059	2.00791	BACE1
regulation of defense response (GO:0031347)	1/76	0.170373	0.275581	-1.12334	1.98805	ERAP1
response to calcium ion (GO:0051592)	1/80	0.178505	0.282231	-1.14917	1.98018	FGA
DNA metabolic process (GO:0006259)	2/315	0.180325	0.282878	-1.15565	1.97963	SMG1;DDB2
regulation of macroautophagy (GO:0016241)	1/117	0.250117	0.330042	-1.42663	1.97706	ATG101
antigen processing and presentation of exogenous peptide antigen via MHC class I (GO:0042590)	1/79	0.176479	0.281565	-1.13425	1.96741	IFI30
positive regulation of protein secretion (GO:0050714)	1/83	0.184553	0.285366	-1.14333	1.93202	FGA
regulation of protein processing (GO:0070613)	1/129	0.272001	0.349716	-1.4681	1.91139	CFI
protein processing (GO:0016485)	1/102	0.221854	0.313995	-1.26895	1.9107	HFE2
negative regulation of extrinsic apoptotic signaling pathway (GO:2001237)	1/77	0.172414	0.277602	-1.08324	1.90419	FGA
cellular response to DNA damage stimulus (GO:0006974)	2/330	0.193587	0.294152	-1.14979	1.88798	SMG1;DDB2
ERAD pathway (GO:0036503)	1/78	0.174449	0.279596	-1.06205	1.85448	HERPUD1
viral life cycle (GO:0019058)	1/108	0.233282	0.324653	-1.27303	1.85291	IST1
nucleotide-excision repair (GO:0006289)	1/109	0.235171	0.324653	-1.27786	1.84963	DDB2
toll-like receptor signaling pathway (GO:0002224)	1/87	0.192548	0.293846	-1.11804	1.84186	FGA
cell-cell junction assembly (GO:0007043)	1/80	0.178505	0.282231	-1.05869	1.82426	VCL
regulation of acute inflammatory response (GO:0002673)	1/122	0.259313	0.335863	-1.33937	1.80777	CFI
phosphatidylinositol metabolic process (GO:0046488)	1/113	0.24268	0.330042	-1.25369	1.77524	SMG1
glycerophospholipid biosynthetic process (GO:0046474)	1/165	0.333967	0.404216	-1.61544	1.77168	ETNK1
regulation of kinase activity (GO:0043549)	1/102	0.221854	0.313995	-1.15734	1.74264	KIDINS220
regulation of lipid metabolic process (GO:0019216)	1/101	0.219933	0.313807	-1.14027	1.72686	SULT2A1
regulation of complement activation (GO:0030449)	1/110	0.237055	0.325025	-1.19035	1.71346	CFI
neutrophil degranulation (GO:0043312)	2/480	0.329515	0.401596	-1.54104	1.71076	IST1;VCL
regulation of insulin secretion (GO:0050796)	1/99	0.216078	0.313402	-1.11614	1.71006	ARNTL
negative regulation of cell differentiation (GO:0045596)	1/151	0.310509	0.383763	-1.44996	1.69579	ARNTL
response to UV (GO:0009411)	1/99	0.216078	0.313402	-1.10123	1.68721	DDB2
negative regulation of cell motility (GO:2000146)	1/98	0.214143	0.313402	-1.09085	1.68113	VCL
cellular protein localization (GO:0034613)	2/328	0.191811	0.293846	-1.00406	1.65794	SEC23IP;VCL
response to endoplasmic reticulum stress (GO:0034976)	1/107	0.231389	0.323576	-1.11629	1.63386	HERPUD1
neutrophil mediated immunity (GO:0002446)	2/488	0.336722	0.406149	-1.49092	1.62286	IST1;VCL
positive regulation of neuron projection development (GO:0010976)	1/98	0.214143	0.313402	-1.04178	1.60549	KIDINS220
peptide biosynthetic process (GO:0043043)	1/175	0.350243	0.419574	-1.49359	1.56696	HBS1L
macroautophagy (GO:0016236)	1/111	0.238935	0.326327	-1.09239	1.56382	ATG101
mRNA export from nucleus (GO:0006406)	1/106	0.229491	0.322206	-1.06166	1.56265	SMG1
positive regulation of neuron differentiation (GO:0045666)	1/99	0.216078	0.313402	-1.01967	1.56226	KIDINS220
mRNA transport (GO:0051028)	1/105	0.227589	0.320818	-1.05477	1.56128	SMG1
generation of neurons (GO:0048699)	1/131	0.275587	0.35175	-1.18494	1.52721	ARNTL
sphingolipid metabolic process (GO:0006665)	1/117	0.250117	0.330042	-1.08897	1.50913	CERS6
post-translational protein modification (GO:0043687)	2/358	0.218668	0.313807	-0.979602	1.48919	FGA;DDB2
protein autophosphorylation (GO:0046777)	1/176	0.351849	0.420064	-1.42072	1.48402	SMG1
RNA export from nucleus (GO:0006405)	1/120	0.255648	0.334822	-1.07418	1.46513	SMG1
negative regulation of transcription, DNA-templated (GO:0045892)	3/814	0.321693	0.39343	-1.28745	1.46016	ARID5B;HFE2;ARNTL
Golgi organization (GO:0007030)	1/122	0.259313	0.335863	-1.07047	1.44484	SEC23IP
organelle assembly (GO:0070925)	2/377	0.235859	0.324653	-0.998874	1.4429	IST1;ATG101
cellular calcium ion homeostasis (GO:0006874)	1/124	0.26296	0.339334	-1.07566	1.43682	HERPUD1
regulation of macromolecule metabolic process (GO:0060255)	1/130	0.273796	0.350739	-1.10111	1.42634	EIF4A2
negative regulation of cell migration (GO:0030336)	1/122	0.259313	0.335863	-1.04608	1.41191	VCL
peptidyl-serine phosphorylation (GO:0018105)	1/146	0.301936	0.375814	-1.17236	1.40395	SMG1
cellular protein complex assembly (GO:0043623)	1/145	0.300209	0.374995	-1.13314	1.36348	FGA
protein complex assembly (GO:0006461)	1/190	0.373928	0.440432	-1.38162	1.35909	SEC23IP
regulation of neuron projection development (GO:0010975)	1/120	0.255648	0.334822	-0.988662	1.34849	KIDINS220
positive regulation of Wnt signaling pathway (GO:0030177)	1/141	0.293259	0.368939	-1.09761	1.34643	ARNTL
regulation of protein kinase activity (GO:0045859)	1/148	0.305378	0.378755	-1.12581	1.33544	KIDINS220
regulation of small GTPase mediated signal transduction (GO:0051056)	1/141	0.293259	0.368939	-1.08793	1.33456	FAM13B
ER to Golgi vesicle-mediated transport (GO:0006888)	1/181	0.359821	0.425242	-1.2482	1.27585	SEC23IP
spermatogenesis (GO:0007283)	1/154	0.315603	0.38869	-1.10462	1.27393	ARNTL
positive regulation of cell migration (GO:0030335)	1/222	0.421665	0.475899	-1.45191	1.25379	CAPN7
regulation of primary metabolic process (GO:0080090)	1/140	0.291511	0.368939	-1.01017	1.24521	SULT2A1
muscle contraction (GO:0006936)	1/138	0.288003	0.366264	-0.986425	1.22789	VCL
peptidyl-serine modification (GO:0018209)	1/171	0.34378	0.413242	-1.14785	1.22562	SMG1
positive regulation of multicellular organismal process (GO:0051240)	1/203	0.39377	0.456149	-1.30846	1.21947	CAPN7
positive regulation of MAP kinase activity (GO:0043406)	1/178	0.355049	0.422448	-1.1725	1.21412	KIDINS220
positive regulation of ERK1 and ERK2 cascade (GO:0070374)	1/202	0.392265	0.455911	-1.24015	1.16055	FGA
viral process (GO:0016032)	1/221	0.420229	0.475807	-1.32493	1.14866	IST1
plasma membrane bounded cell projection assembly (GO:0120031)	1/242	0.44967	0.49736	-1.39187	1.11244	VCL
neutrophil activation involved in immune response (GO:0002283)	2/484	0.333121	0.404216	-1.00784	1.10787	IST1;VCL
male gamete generation (GO:0048232)	1/155	0.317293	0.389405	-0.954409	1.0956	ARNTL
regulation of translation (GO:0006417)	1/214	0.410076	0.46885	-1.20197	1.07145	EIF4A2
RNA processing (GO:0006396)	1/194	0.3801	0.444717	-1.06973	1.03477	HNRNPL
extracellular matrix organization (GO:0030198)	1/230	0.433031	0.48716	-1.22691	1.02686	FGA
protein deubiquitination (GO:0016579)	1/258	0.471114	0.515143	-1.34898	1.01531	DDB2
mRNA splicing, via spliceosome (GO:0000398)	1/262	0.476346	0.516041	-1.33602	0.990808	HNRNPL
proteasomal protein catabolic process (GO:0010498)	1/238	0.444178	0.493375	-1.21625	0.987024	ARNTL
positive regulation of cell differentiation (GO:0045597)	1/195	0.381634	0.445028	-1.01214	0.974993	ARNTL
positive regulation of GTPase activity (GO:0043547)	1/193	0.378563	0.4444	-0.995878	0.967369	ARHGAP42
regulation of canonical Wnt signaling pathway (GO:0060828)	1/214	0.410076	0.46885	-1.07019	0.953976	ARNTL
regulation of autophagy (GO:0010506)	1/204	0.39527	0.456381	-1.02485	0.951253	ATG101
positive regulation of sequence-specific DNA binding transcription factor activity (GO:0051091)	1/216	0.412995	0.46913	-1.04875	0.92743	ARID5B
regulation of cell cycle (GO:0051726)	1/216	0.412995	0.46913	-1.03822	0.91812	ARNTL
negative regulation of cellular macromolecule biosynthetic process (GO:2000113)	2/513	0.359103	0.425242	-0.844214	0.864599	ARID5B;ARNTL
Golgi vesicle transport (GO:0048193)	1/272	0.489204	0.52834	-1.18061	0.84411	SEC23IP
translation (GO:0006412)	1/233	0.437236	0.490317	-1.01274	0.837819	HBS1L
activation of protein kinase activity (GO:0032147)	1/234	0.438631	0.490317	-1.01047	0.832722	KIDINS220
RNA splicing, via transesterification reactions with bulged adenosine as nucleophile (GO:0000377)	1/237	0.442796	0.493375	-1.00767	0.820897	HNRNPL
protein transport (GO:0015031)	1/327	0.554586	0.588096	-1.37535	0.810817	SEC23IP
protein polyubiquitination (GO:0000209)	1/284	0.504226	0.541234	-1.15754	0.792605	DDB2
mRNA processing (GO:0006397)	1/284	0.504226	0.541234	-1.14048	0.78092	HNRNPL
regulation of immune response (GO:0050776)	1/252	0.46317	0.50804	-1.00015	0.769775	ERAP1
negative regulation of transcription from RNA polymerase II promoter (GO:0000122)	2/566	0.405639	0.466818	-0.844901	0.762346	ARID5B;HFE2
negative regulation of gene expression (GO:0010629)	2/619	0.4506	0.49736	-0.943899	0.752453	ARID5B;ARNTL
protein modification by small protein removal (GO:0070646)	1/262	0.476346	0.516041	-0.988922	0.733396	DDB2
regulation of protein phosphorylation (GO:0001932)	1/262	0.476346	0.516041	-0.941866	0.698499	KIDINS220
cellular macromolecule biosynthetic process (GO:0034645)	1/368	0.597919	0.628352	-1.30699	0.672187	HBS1L
intracellular protein transport (GO:0006886)	1/348	0.577323	0.60853	-1.22311	0.67192	SEC23IP
proteasome-mediated ubiquitin-dependent protein catabolic process (GO:0043161)	1/292	0.514	0.548371	-0.998214	0.664343	ARNTL
regulation of ERK1 and ERK2 cascade (GO:0070372)	1/248	0.45781	0.503734	-0.837205	0.65411	FGA
positive regulation of transcription from RNA polymerase II promoter (GO:0045944)	2/849	0.62165	0.651341	-1.34548	0.639611	HFE2;ARNTL
regulation of intracellular signal transduction (GO:1902531)	1/423	0.649621	0.676608	-1.41887	0.612054	FAM13B
regulation of cell migration (GO:0030334)	1/317	0.543341	0.577918	-0.965036	0.588689	VCL
positive regulation of MAPK cascade (GO:0043410)	1/290	0.511574	0.547447	-0.86847	0.582103	FGA
ubiquitin-dependent protein catabolic process (GO:0006511)	1/342	0.570946	0.60362	-0.855832	0.479661	ARNTL
positive regulation of nucleic acid-templated transcription (GO:1903508)	1/503	0.713389	0.732163	-1.36525	0.461084	ARNTL
negative regulation of programmed cell death (GO:0043069)	1/409	0.637114	0.665557	-0.968482	0.436598	MT-RNR2
cellular protein modification process (GO:0006464)	2/1002	0.711548	0.732163	-1.25107	0.425756	FGA;DDB2
regulation of gene expression (GO:0010468)	2/1038	0.729993	0.744847	-1.3051	0.410742	EIF4A2;ARNTL
regulation of nucleic acid-templated transcription (GO:1903506)	1/608	0.780095	0.791368	-1.44689	0.359321	ARNTL
regulation of transcription from RNA polymerase II promoter (GO:0006357)	3/1479	0.712647	0.732163	-0.965176	0.326972	ARID5B;HFE2;ARNTL
protein phosphorylation (GO:0006468)	1/471	0.689377	0.715892	-0.854397	0.317807	SMG1
positive regulation of transcription, DNA-templated (GO:0045893)	2/1121	0.768831	0.782202	-1.158	0.30442	HFE2;ARNTL
negative regulation of apoptotic process (GO:0043066)	1/486	0.700869	0.725678	-0.811008	0.288261	MT-RNR2
protein ubiquitination (GO:0016567)	1/507	0.71626	0.732966	-0.837576	0.279509	DDB2
cytokine-mediated signaling pathway (GO:0019221)	1/634	0.794103	0.800949	-1.02663	0.236682	IFI30
regulation of cellular macromolecule biosynthetic process (GO:2000112)	1/632	0.793058	0.800949	-0.974347	0.225911	ARNTL
positive regulation of gene expression (GO:0010628)	1/772	0.855031	0.859931	-1.17629	0.184228	ARNTL
regulation of apoptotic process (GO:0042981)	1/816	0.870443	0.87293	-1.22657	0.17019	MT-RNR2
regulation of transcription, DNA-templated (GO:0006355)	2/1599	0.911636	0.911636	-1.21149	0.11208	ARID5B;ARNTL

## Sheet: MAJIQ Cortex (Adar2 KO)
Term	Overlap	P-value	Adjusted P-value	Z-score	Combined Score	Genes
spermine metabolic process (GO:0008215)	1/7	0.0121877	0.196701	-2.8436	12.5327	SAT2
norepinephrine metabolic process (GO:0042415)	1/9	0.0156433	0.196701	-2.97143	12.3543	RNF180
endothelial cell chemotaxis (GO:0035767)	1/10	0.0173667	0.196701	-3.01991	12.2403	PLEKHG5
regulation of striated muscle cell differentiation (GO:0051153)	1/9	0.0156433	0.196701	-2.90322	12.0708	HDAC5
regulation of microtubule-based movement (GO:0060632)	1/10	0.0173667	0.196701	-2.71428	11.0015	CCDC65
Cdc42 protein signal transduction (GO:0032488)	1/10	0.0173667	0.196701	-2.6745	10.8403	RHOBTB3
spermidine metabolic process (GO:0008216)	1/8	0.013917	0.196701	-2.51157	10.7361	SAT2
neuronal ion channel clustering (GO:0045161)	1/10	0.0173667	0.196701	-2.57445	10.4348	NRCAM
neuron projection fasciculation (GO:0106030)	1/11	0.0190872	0.196701	-2.52327	9.98896	NRCAM
regulation of extent of cell growth (GO:0061387)	1/7	0.0121877	0.196701	-2.25203	9.92542	NRCAM
retrograde transport, endosome to plasma membrane (GO:1990126)	1/15	0.0259398	0.196701	-2.63996	9.64107	SDCCAG3
alternative mRNA splicing, via spliceosome (GO:0000380)	1/13	0.0225193	0.196701	-2.47186	9.37669	HNRNPM
negative regulation of myotube differentiation (GO:0010832)	1/12	0.0208047	0.196701	-2.39104	9.25949	HDAC5
cellular glucan metabolic process (GO:0006073)	1/13	0.0225193	0.196701	-2.33326	8.85096	GBE1
sodium ion import across plasma membrane (GO:0098719)	1/16	0.0276457	0.196701	-2.4652	8.84583	SLC9A5
sodium ion import (GO:0097369)	1/16	0.0276457	0.196701	-2.40367	8.62504	SLC9A5
axonal fasciculation (GO:0007413)	1/13	0.0225193	0.196701	-2.23475	8.47726	NRCAM
polyamine metabolic process (GO:0006595)	1/13	0.0225193	0.196701	-2.21582	8.40547	SAT2
protein localization to microtubule organizing center (GO:1905508)	1/17	0.0293487	0.196701	-2.3341	8.23589	DCTN2
regulation of cilium movement (GO:0003352)	1/9	0.0156433	0.196701	-1.95004	8.10768	CCDC65
chromatin assembly or disassembly (GO:0006333)	1/14	0.024231	0.196701	-2.13513	7.94294	HIRIP3
glucan biosynthetic process (GO:0009250)	1/19	0.032746	0.196701	-2.31994	7.93183	GBE1
cell projection assembly (GO:0030031)	1/21	0.0361317	0.196701	-2.38129	7.90727	RHOBTB3
negative regulation of cell migration involved in sprouting angiogenesis (GO:0090051)	1/15	0.0259398	0.196701	-2.14219	7.82321	HDAC5
catecholamine metabolic process (GO:0006584)	1/16	0.0276457	0.196701	-2.0474	7.34665	RNF180
regulation of myotube differentiation (GO:0010830)	1/20	0.0344403	0.196701	-2.16504	7.29299	HDAC5
vesicle-mediated transport between endosomal compartments (GO:0098927)	1/24	0.0411887	0.196701	-2.24023	7.14542	HOOK2
inorganic cation import across plasma membrane (GO:0098659)	1/26	0.0445457	0.196701	-2.22683	6.92822	SLC9A5
endosomal transport (GO:0016197)	3/230	0.00749142	0.196701	-1.40573	6.87966	SDCCAG3;HOOK2;RHOBTB3
protein deacylation (GO:0035601)	1/17	0.0293487	0.196701	-1.94223	6.85317	HDAC5
negative regulation of striated muscle cell differentiation (GO:0051154)	1/17	0.0293487	0.196701	-1.90345	6.71633	HDAC5
cilium-dependent cell motility (GO:0060285)	1/25	0.0428686	0.196701	-2.09952	6.61267	CCDC65
early endosome to late endosome transport (GO:0045022)	1/23	0.0395059	0.196701	-2.03375	6.57166	HOOK2
protein localization to centrosome (GO:0071539)	1/19	0.032746	0.196701	-1.89664	6.48457	DCTN2
energy reserve metabolic process (GO:0006112)	1/22	0.0378202	0.196701	-1.95782	6.4117	GBE1
vesicle-mediated transport to the plasma membrane (GO:0098876)	1/32	0.0545484	0.196701	-2.1772	6.33276	SDCCAG3
cytoskeleton-dependent intracellular transport (GO:0030705)	1/27	0.0462199	0.196701	-2.04722	6.29386	HOOK2
RNA metabolic process (GO:0016070)	2/192	0.0443481	0.196701	-1.94606	6.06332	HNRNPM;DDX50
negative regulation of sprouting angiogenesis (GO:1903671)	1/23	0.0395059	0.196701	-1.81058	5.85052	HDAC5
regulation of cell migration involved in sprouting angiogenesis (GO:0090049)	1/31	0.0528884	0.196701	-1.98852	5.8454	HDAC5
axoneme assembly (GO:0035082)	1/25	0.0428686	0.196701	-1.79986	5.66885	CCDC65
protein deacetylation (GO:0006476)	1/33	0.0562056	0.196701	-1.94974	5.6128	HDAC5
negative regulation of Notch signaling pathway (GO:0045746)	1/30	0.0512255	0.196701	-1.87117	5.5602	ARRDC1
negative regulation of blood vessel endothelial cell migration (GO:0043537)	1/32	0.0545484	0.196701	-1.90567	5.54296	HDAC5
regulation of developmental growth (GO:0048638)	1/31	0.0528884	0.196701	-1.88126	5.5301	NRCAM
cytosolic transport (GO:0016482)	2/119	0.0183785	0.196701	-1.375	5.4953	HOOK2;RHOBTB3
glycosphingolipid metabolic process (GO:0006687)	1/55	0.0919581	0.226167	-2.255	5.38138	ARSK
endothelial cell migration (GO:0043542)	1/36	0.0611603	0.197081	-1.90993	5.33683	PLEKHG5
cortical cytoskeleton organization (GO:0030865)	1/30	0.0512255	0.196701	-1.75716	5.22144	RHOBTB3
glycogen biosynthetic process (GO:0005978)	1/19	0.032746	0.196701	-1.5148	5.17908	GBE1
regulation of cellular pH (GO:0030641)	1/39	0.0660896	0.203611	-1.8895	5.13328	SLC9A5
lytic vacuole organization (GO:0080171)	1/29	0.0495598	0.196701	-1.70305	5.11694	HOOK2
axonemal dynein complex assembly (GO:0070286)	1/34	0.05786	0.196701	-1.79307	5.10978	CCDC65
lysosome organization (GO:0007040)	1/32	0.0545484	0.196701	-1.68448	4.89959	HOOK2
peptide transport (GO:0015833)	1/42	0.0709939	0.205093	-1.82077	4.81623	ARRDC1
regulation of cell division (GO:0051302)	1/66	0.109337	0.236248	-2.15122	4.76133	SDCCAG3
histone deacetylation (GO:0016575)	1/37	0.0628062	0.197081	-1.70602	4.72175	HDAC5
endosome organization (GO:0007032)	1/37	0.0628062	0.197081	-1.68989	4.67711	HOOK2
glycogen metabolic process (GO:0005977)	1/34	0.05786	0.196701	-1.62865	4.6412	GBE1
endosome to lysosome transport (GO:0008333)	1/49	0.08234	0.215195	-1.81707	4.53703	HOOK2
regulation of axon extension (GO:0030516)	1/35	0.0595115	0.196929	-1.53779	4.339	NRCAM
cognition (GO:0050890)	1/41	0.0693619	0.203611	-1.62139	4.32655	SOBP
defense response to Gram-positive bacterium (GO:0050830)	1/66	0.109337	0.236248	-1.94298	4.30042	ROMO1
regulation of cytokinesis (GO:0032465)	1/78	0.127928	0.24003	-2.07698	4.27086	SDCCAG3
neuron migration (GO:0001764)	1/41	0.0693619	0.203611	-1.58417	4.22722	NRCAM
microtubule cytoskeleton organization involved in mitosis (GO:1902850)	1/45	0.0758731	0.212445	-1.6118	4.15634	DCTN2
endocytosis (GO:0006897)	2/264	0.077715	0.214305	-1.61947	4.13728	HOOK2;RHOBTB3
RNA secondary structure unwinding (GO:0010501)	1/47	0.0791121	0.214901	-1.60185	4.06373	DDX50
regulation of intracellular pH (GO:0051453)	1/45	0.0758731	0.212445	-1.55035	3.99787	SLC9A5
response to insulin (GO:0032868)	1/72	0.11868	0.236248	-1.86182	3.96814	HDAC5
positive regulation of reactive oxygen species metabolic process (GO:2000379)	1/40	0.0677272	0.203611	-1.4625	3.93743	ROMO1
regulation of reactive oxygen species metabolic process (GO:2000377)	1/50	0.0839499	0.215195	-1.57684	3.90669	ROMO1
synapse assembly (GO:0007416)	1/64	0.106202	0.236248	-1.68293	3.77383	NRCAM
cytoplasmic microtubule organization (GO:0031122)	1/49	0.08234	0.215195	-1.47365	3.67956	HOOK2
Ras protein signal transduction (GO:0007265)	2/224	0.0583617	0.196701	-1.28633	3.65458	RHOBTB3;RGL2
positive regulation of proteasomal protein catabolic process (GO:1901800)	1/74	0.121774	0.236248	-1.7095	3.5995	RNF180
antimicrobial humoral immune response mediated by antimicrobial peptide (GO:0061844)	1/50	0.0839499	0.215195	-1.4459	3.58227	ROMO1
regulation of axonogenesis (GO:0050770)	1/56	0.0935515	0.227018	-1.49199	3.53489	NRCAM
antigen processing and presentation of exogenous peptide antigen via MHC class II (GO:0019886)	1/98	0.158078	0.248917	-1.82668	3.36961	DCTN2
B cell differentiation (GO:0030183)	1/53	0.088763	0.224373	-1.391	3.3687	HDAC5
regulation of proteasomal ubiquitin-dependent protein catabolic process (GO:0032434)	1/89	0.144638	0.248917	-1.72902	3.34309	RNF180
cilium assembly (GO:0060271)	2/289	0.0907061	0.226144	-1.38251	3.3182	DCTN2;CCDC65
cellular response to fibroblast growth factor stimulus (GO:0044344)	1/95	0.153621	0.248917	-1.75107	3.28021	HNRNPM
cell chemotaxis (GO:0060326)	1/61	0.101478	0.236248	-1.42595	3.26245	PLEKHG5
antigen processing and presentation of exogenous peptide antigen (GO:0002478)	1/98	0.158078	0.248917	-1.76087	3.24822	DCTN2
glycolipid metabolic process (GO:0006664)	1/66	0.109337	0.236248	-1.46752	3.24808	ARSK
chromatin remodeling (GO:0006338)	1/117	0.185781	0.272679	-1.88429	3.1716	HDAC5
cellular response to oxidative stress (GO:0034599)	1/116	0.184346	0.272679	-1.86788	3.15848	ROMO1
antigen processing and presentation of peptide antigen via MHC class II (GO:0002495)	1/99	0.159559	0.248917	-1.71865	3.15431	DCTN2
B cell activation (GO:0042113)	1/74	0.121774	0.236248	-1.46756	3.09009	HDAC5
positive regulation of proteasomal ubiquitin-dependent protein catabolic process (GO:0032436)	1/71	0.11713	0.236248	-1.43627	3.08005	RNF180
cellular response to reactive oxygen species (GO:0034614)	1/66	0.109337	0.236248	-1.3704	3.03312	ROMO1
defense response to Gram-negative bacterium (GO:0050829)	1/72	0.11868	0.236248	-1.41798	3.02217	ROMO1
protein ubiquitination (GO:0016567)	3/507	0.0582801	0.196701	-1.05785	3.00693	KBTBD3;ARRDC1;RNF180
nucleic acid metabolic process (GO:0090304)	1/81	0.132517	0.243616	-1.4787	2.98853	HNRNPM
regulation of Notch signaling pathway (GO:0008593)	1/71	0.11713	0.236248	-1.38584	2.9719	ARRDC1
small GTPase mediated signal transduction (GO:0007264)	1/100	0.161037	0.248917	-1.6114	2.94261	RGL2
cellular response to peptide hormone stimulus (GO:0071375)	1/111	0.17713	0.268605	-1.69324	2.93079	HDAC5
lymphocyte differentiation (GO:0030098)	1/74	0.121774	0.236248	-1.38089	2.9076	HDAC5
regulation of cytoskeleton organization (GO:0051493)	1/96	0.155109	0.248917	-1.54831	2.88547	RHOBTB3
positive regulation of neurogenesis (GO:0050769)	1/70	0.115577	0.236248	-1.33083	2.8717	NRCAM
response to reactive oxygen species (GO:0000302)	1/61	0.101478	0.236248	-1.24257	2.84288	ROMO1
regulation of actin cytoskeleton organization (GO:0032956)	1/76	0.124856	0.236706	-1.35407	2.81726	RHOBTB3
regulation of cell cycle process (GO:0010564)	1/91	0.147643	0.248917	-1.46593	2.80427	SDCCAG3
regulation of actin filament-based process (GO:0032970)	1/63	0.10463	0.236248	-1.23513	2.78808	RHOBTB3
fibroblast growth factor receptor signaling pathway (GO:0008543)	1/79	0.12946	0.240426	-1.36353	2.78757	HNRNPM
lysosomal transport (GO:0007041)	1/73	0.120228	0.236248	-1.31063	2.77639	HOOK2
mitotic spindle organization (GO:0007052)	1/75	0.123316	0.236248	-1.32289	2.76882	DCTN2
positive regulation of cellular metabolic process (GO:0031325)	1/93	0.150637	0.248917	-1.45872	2.76119	ROMO1
regulation of gene expression, epigenetic (GO:0040029)	1/75	0.123316	0.236248	-1.3102	2.74225	HDAC5
vesicle-mediated transport (GO:0016192)	2/411	0.161386	0.248917	-1.50187	2.73935	HOOK2;RHOBTB3
cell cycle G2/M phase transition (GO:0044839)	1/128	0.201413	0.284164	-1.65167	2.64663	DCTN2
retrograde transport, endosome to Golgi (GO:0042147)	1/83	0.135563	0.246724	-1.32152	2.64081	RHOBTB3
Rho protein signal transduction (GO:0007266)	1/73	0.120228	0.236248	-1.17333	2.48555	RHOBTB3
regulation of cell cycle G2/M phase transition (GO:1902749)	1/85	0.138598	0.247303	-1.24781	2.46589	DCTN2
regulation of protein binding (GO:0043393)	1/112	0.178578	0.268605	-1.40795	2.42551	HDAC5
regulation of G2/M transition of mitotic cell cycle (GO:0010389)	1/150	0.231807	0.314842	-1.59278	2.3284	DCTN2
regulation of neuron differentiation (GO:0045664)	1/85	0.138598	0.247303	-1.17688	2.32572	NRCAM
axon development (GO:0061564)	1/95	0.153621	0.248917	-1.18475	2.21936	NRCAM
cell morphogenesis involved in neuron differentiation (GO:0048667)	1/98	0.158078	0.248917	-1.20134	2.21607	NRCAM
regulation of mitotic cell cycle phase transition (GO:1901990)	1/185	0.277859	0.366452	-1.72287	2.20637	DCTN2
ciliary basal body-plasma membrane docking (GO:0097711)	1/97	0.156595	0.248917	-1.17286	2.17459	DCTN2
histone modification (GO:0016570)	1/99	0.159559	0.248917	-1.18424	2.17349	HDAC5
generation of neurons (GO:0048699)	1/131	0.205626	0.287876	-1.31934	2.0868	NRCAM
cellular response to insulin stimulus (GO:0032869)	1/111	0.17713	0.268605	-1.1709	2.02667	HDAC5
positive regulation of neuron differentiation (GO:0045666)	1/99	0.159559	0.248917	-1.0975	2.01429	NRCAM
neuron projection morphogenesis (GO:0048812)	1/164	0.25056	0.335309	-1.42883	1.97758	NRCAM
G2/M transition of mitotic cell cycle (GO:0000086)	1/127	0.200004	0.284164	-1.2282	1.97668	DCTN2
sphingolipid metabolic process (GO:0006665)	1/117	0.185781	0.272679	-1.17118	1.97131	ARSK
protein modification by small protein conjugation (GO:0032446)	2/399	0.15402	0.248917	-1.05358	1.9709	KBTBD3;ARRDC1
vesicle organization (GO:0016050)	1/128	0.201413	0.284164	-1.21387	1.9451	HOOK2
ER to Golgi vesicle-mediated transport (GO:0006888)	1/181	0.272735	0.362319	-1.46225	1.89984	DCTN2
modification-dependent protein catabolic process (GO:0019941)	1/142	0.220887	0.304556	-1.2565	1.89745	ARRDC1
cellular protein complex assembly (GO:0043623)	1/145	0.225	0.307894	-1.26661	1.88935	CCDC65
cytoskeleton organization (GO:0007010)	1/127	0.200004	0.284164	-1.14689	1.84582	RHOBTB3
regulation of small GTPase mediated signal transduction (GO:0051056)	1/141	0.219512	0.304556	-1.2109	1.83615	PLEKHG5
actin filament organization (GO:0007015)	1/121	0.1915	0.278824	-1.10083	1.81953	RHOBTB3
central nervous system development (GO:0007417)	1/218	0.318816	0.408623	-1.5658	1.78993	NRCAM
positive regulation of I-kappaB kinase/NF-kappaB signaling (GO:0043123)	1/164	0.25056	0.335309	-1.26227	1.74705	PLEKHG5
plasma membrane bounded cell projection assembly (GO:0120031)	1/242	0.347176	0.429837	-1.60472	1.69767	CCDC65
axonogenesis (GO:0007409)	1/224	0.326016	0.412048	-1.50398	1.68567	NRCAM
inflammatory response (GO:0006954)	1/253	0.359788	0.442442	-1.57966	1.61479	HDAC5
protein deubiquitination (GO:0016579)	1/258	0.365442	0.442943	-1.58566	1.5962	JOSD2
cilium organization (GO:0044782)	1/193	0.288002	0.377096	-1.26636	1.57635	CCDC65
mRNA splicing, via spliceosome (GO:0000398)	1/262	0.36993	0.442943	-1.55751	1.54885	HNRNPM
defense response to bacterium (GO:0042742)	1/242	0.347176	0.429837	-1.45759	1.54202	ROMO1
regulation of I-kappaB kinase/NF-kappaB signaling (GO:0043122)	1/205	0.302958	0.393845	-1.17974	1.40879	PLEKHG5
Golgi vesicle transport (GO:0048193)	1/272	0.381017	0.453236	-1.42079	1.37094	DCTN2
positive regulation of sequence-specific DNA binding transcription factor activity (GO:0051091)	1/216	0.316399	0.408402	-1.17537	1.35255	HDAC5
protein transport (GO:0015031)	1/327	0.438686	0.499005	-1.58639	1.30714	ARRDC1
positive regulation of apoptotic process (GO:0043065)	1/308	0.41938	0.480045	-1.48841	1.2934	PLEKHG5
protein polyubiquitination (GO:0000209)	1/284	0.39407	0.45682	-1.36773	1.27367	RNF180
RNA splicing, via transesterification reactions with bulged adenosine as nucleophile (GO:0000377)	1/237	0.341364	0.428471	-1.14893	1.23488	HNRNPM
mRNA processing (GO:0006397)	1/284	0.39407	0.45682	-1.31821	1.22755	HNRNPM
mitotic cell cycle phase transition (GO:0044772)	1/222	0.323624	0.411885	-1.06715	1.20393	DCTN2
positive regulation of programmed cell death (GO:0043068)	1/258	0.365442	0.442943	-1.17026	1.17804	PLEKHG5
protein modification by small protein removal (GO:0070646)	1/262	0.36993	0.442943	-1.11521	1.10901	JOSD2
regulation of intracellular signal transduction (GO:1902531)	1/423	0.527082	0.579738	-1.70442	1.09151	PLEKHG5
negative regulation of signal transduction (GO:0009968)	1/284	0.39407	0.45682	-1.17179	1.0912	ARRDC1
transmembrane receptor protein tyrosine kinase signaling pathway (GO:0007169)	1/397	0.504576	0.559956	-1.49835	1.02493	HNRNPM
cellular response to oxygen-containing compound (GO:1901701)	1/275	0.384306	0.454179	-1.05759	1.01139	ROMO1
ion transport (GO:0006811)	1/290	0.400497	0.461331	-1.04345	0.954808	SLC9A5
positive regulation of cell proliferation (GO:0008284)	1/425	0.528772	0.579738	-1.35106	0.860893	ROMO1
post-translational protein modification (GO:0043687)	1/358	0.468854	0.526737	-1.04109	0.788591	ARSK
organelle assembly (GO:0070925)	1/377	0.486559	0.543274	-1.06851	0.769751	CCDC65
ubiquitin-dependent protein catabolic process (GO:0006511)	1/342	0.453486	0.512636	-0.970333	0.767332	ARRDC1
positive regulation of intracellular signal transduction (GO:1902533)	1/480	0.573002	0.617079	-1.35986	0.757257	PLEKHG5
nervous system development (GO:0007399)	1/456	0.554221	0.600406	-1.16452	0.68729	NRCAM
negative regulation of nucleic acid-templated transcription (GO:1903507)	1/445	0.545348	0.594331	-1.08687	0.659006	HDAC5
positive regulation of cellular process (GO:0048522)	1/520	0.602609	0.641373	-1.19029	0.602868	ROMO1
negative regulation of cellular macromolecule biosynthetic process (GO:2000113)	1/513	0.597576	0.639758	-0.940152	0.48406	HDAC5
negative regulation of gene expression (GO:0010629)	1/619	0.667568	0.702297	-1.08846	0.439862	HDAC5
negative regulation of transcription from RNA polymerase II promoter (GO:0000122)	1/566	0.634194	0.671066	-0.951117	0.433138	HDAC5
regulation of apoptotic process (GO:0042981)	1/816	0.767581	0.793749	-1.50823	0.398943	PLEKHG5
positive regulation of transcription from RNA polymerase II promoter (GO:0045944)	1/849	0.781185	0.803252	-1.60706	0.396852	HDAC5
negative regulation of transcription, DNA-templated (GO:0045892)	1/814	0.766731	0.793749	-1.47497	0.39178	HDAC5
regulation of cell proliferation (GO:0042127)	1/741	0.733539	0.767265	-0.99169	0.307299	ROMO1
cellular protein modification process (GO:0006464)	1/1002	0.834787	0.853546	-1.48882	0.268849	ARSK
regulation of gene expression (GO:0010468)	1/1038	0.845408	0.859577	-1.58017	0.265367	HDAC5
positive regulation of transcription, DNA-templated (GO:0045893)	1/1121	0.86743	0.877068	-1.42567	0.20276	HDAC5
regulation of transcription, DNA-templated (GO:0006355)	1/1599	0.946015	0.946015	-1.5145	0.0840505	HDAC5
regulation of transcription from RNA polymerase II promoter (GO:0006357)	1/1479	0.932209	0.937359	-1.15947	0.0813929	HDAC5

## Sheet: MAJIQ Combined (Adar1 Adar2 KO)
Term	Overlap	P-value	Adjusted P-value	Z-score	Combined Score	Genes
regulation of mRNA splicing, via spliceosome (GO:0048024)	7/61	3.94064e-05	0.055169	-1.85527	18.8154	HNRNPL;RBM25;SON;YTHDC1;RBM7;SRSF6;SRSF7
response to interleukin-6 (GO:0070741)	3/13	0.00090524	0.158417	-2.62873	18.4204	SBNO2;SELPLG;PTGIS
negative regulation of T cell differentiation in thymus (GO:0033085)	2/7	0.00465735	0.306889	-3.21771	17.2769	ZC3H8;TMEM131L
cellular response to chemokine (GO:1990869)	2/7	0.00465735	0.306889	-3.21483	17.2614	LRCH1;DOCK8
cellular response to hydroxyurea (GO:0072711)	2/8	0.00614726	0.306889	-3.18824	16.2337	TIMELESS;SPIDR
polyamine metabolic process (GO:0006595)	3/13	0.00090524	0.158417	-2.22301	15.5773	SAT2;SAT1;OAZ1
cellular response to nitrogen compound (GO:1901699)	3/15	0.00140786	0.175654	-2.3407	15.3683	HSF1;TIMELESS;SPIDR
mRNA-containing ribonucleoprotein complex export from nucleus (GO:0071427)	8/101	0.000161542	0.0790007	-1.74862	15.2667	NUP214;EIF5A;SMG1;UPF3B;SRSF6;SRSF7;SMG6;WDR33
spermine metabolic process (GO:0008215)	2/7	0.00465735	0.306889	-2.82762	15.1824	SAT2;SAT1
protein autoprocessing (GO:0016540)	2/10	0.00968191	0.398667	-3.26502	15.1415	HTRA2;HFE2
diacylglycerol metabolic process (GO:0046339)	3/14	0.00113913	0.175654	-2.22113	15.0537	DGKD;DGAT1;DGKA
response to chemokine (GO:1990868)	2/7	0.00465735	0.306889	-2.7786	14.9192	LRCH1;DOCK8
response to hydroxyurea (GO:0072710)	2/9	0.00782412	0.353348	-3.05261	14.8068	TIMELESS;SPIDR
negative regulation of NIK/NF-kappaB signaling (GO:1901223)	2/10	0.00968191	0.398667	-2.91804	13.5324	ADGRG3;CPNE1
spermidine metabolic process (GO:0008216)	2/8	0.00614726	0.306889	-2.48081	12.6317	SAT2;SAT1
nuclear-transcribed mRNA catabolic process, nonsense-mediated decay (GO:0000184)	7/113	0.00177686	0.175654	-1.98817	12.5909	SMG1;RPL10;RPL22;PYM1;UPF3B;SKIV2L;SMG6
regulation of peroxisome proliferator activated receptor signaling pathway (GO:0035358)	2/9	0.00782412	0.353348	-2.58189	12.5236	ASXL1;PTGIS
mRNA splice site selection (GO:0006376)	3/25	0.00635698	0.306889	-2.45492	12.4175	PRPF39;YTHDC1;SRSF6
regulation of T cell differentiation in thymus (GO:0033081)	2/13	0.0162825	0.526581	-2.88654	11.8858	TESPA1;ZC3H8
myeloid cell activation involved in immune response (GO:0002275)	2/12	0.0139168	0.520531	-2.76874	11.8354	SBNO2;DOCK2
lipid phosphorylation (GO:0046834)	4/36	0.00215196	0.188296	-1.76648	10.8486	SMG1;DGKD;DGKA;IP6K2
cellular response to interleukin-6 (GO:0071354)	3/24	0.00565743	0.306889	-1.99871	10.3429	SBNO2;SELPLG;PTGIS
mRNA transport (GO:0051028)	8/105	0.000211444	0.0790007	-1.2076	10.2182	NUP214;EIF5A;SMG1;UPF3B;SRSF6;SRSF7;SMG6;WDR33
mRNA export from nucleus (GO:0006406)	8/106	0.000225716	0.0790007	-1.212	10.1763	NUP214;EIF5A;SMG1;UPF3B;SRSF6;SRSF7;SMG6;WDR33
alternative mRNA splicing, via spliceosome (GO:0000380)	2/13	0.0162825	0.526581	-2.44969	10.087	HNRNPM;SRSF6
positive regulation of double-strand break repair (GO:2000781)	3/16	0.00171323	0.175654	-1.54575	9.84543	TIMELESS;MMS19;SPIDR
RNA export from nucleus (GO:0006405)	8/120	0.000523259	0.146513	-1.23347	9.31943	NUP214;EIF5A;SMG1;UPF3B;SRSF6;SRSF7;SMG6;WDR33
gene expression (GO:0010467)	16/412	0.000653213	0.152416	-1.25388	9.19545	NUP214;EIF5A;HBS1L;SMG1;RPL10;RPL22;UPF3B;RRBP1;SMG6;WDR33;HNRNPL;TSPAN14;MMS19;SRSF6;PTMA;SRSF7
positive regulation of ERAD pathway (GO:1904294)	2/14	0.0188064	0.526581	-2.31318	9.19155	BAG6;HERPUD1
regulation of alternative mRNA splicing, via spliceosome (GO:0000381)	4/40	0.00318283	0.262115	-1.59218	9.15503	HNRNPL;RBM25;RBM7;SRSF6
negative regulation of mRNA splicing, via spliceosome (GO:0048025)	2/14	0.0188064	0.526581	-2.29003	9.09956	SRSF6;SRSF7
type I interferon signaling pathway (GO:0060337)	4/66	0.0184414	0.526581	-2.24529	8.96577	IRF3;IRAK1;IRF9;IP6K2
regulation of chromosome organization (GO:0033044)	3/25	0.00635698	0.306889	-1.76183	8.91172	CDT1;SMG1;SMG6
microtubule cytoskeleton organization involved in mitosis (GO:1902850)	4/45	0.00488866	0.306889	-1.63534	8.70138	CEP126;DCTN2;PCNT;AURKA
cellular response to DNA damage stimulus (GO:0006974)	13/330	0.00181147	0.175654	-1.33805	8.44791	SMG1;FANCA;HTRA2;SMC5;FMN2;USP28;SPIDR;FANCG;MAPK12;DDB2;IRF3;TIMELESS;MMS19
regulation of mRNA processing (GO:0050684)	3/29	0.00965582	0.398667	-1.81099	8.40334	SRPK3;SON;YTHDC1
cellular macromolecular complex assembly (GO:0034622)	3/35	0.0161731	0.526581	-2.00735	8.27914	FGA;HSF1;DNAJB14
regulation of cell cycle (GO:0051726)	10/216	0.00188201	0.175654	-1.30382	8.18201	ZBTB17;MAP4K2;RBL1;SON;HTRA2;TSC2;PTPRK;FBXO5;INHA;ARNTL
cellular response to inorganic substance (GO:0071241)	2/18	0.0303784	0.601369	-2.30562	8.05589	TIMELESS;SPIDR
regulation of keratinocyte proliferation (GO:0010837)	2/19	0.0336152	0.601369	-2.35223	7.98061	PTPRK;SRSF6
nuclear-transcribed mRNA catabolic process (GO:0000956)	9/175	0.00153672	0.175654	-1.22693	7.94819	EIF4A2;SMG1;CNOT6;RPL10;RPL22;PYM1;UPF3B;MTPAP;SMG6
negative regulation of keratinocyte differentiation (GO:0045617)	1/7	0.102322	0.601369	-3.40918	7.77167	SRSF6
negative regulation of epidermal cell differentiation (GO:0045605)	1/8	0.116061	0.601369	-3.58981	7.73115	SRSF6
negative regulation of lymphocyte differentiation (GO:0045620)	1/7	0.102322	0.601369	-3.30446	7.53294	INHA
DNA replication checkpoint (GO:0000076)	2/18	0.0303784	0.601369	-2.14017	7.47779	CDT1;TIMELESS
establishment of mitochondrion localization, microtubule-mediated (GO:0034643)	1/7	0.102322	0.601369	-3.23801	7.38147	RHOT2
cellular macromolecule catabolic process (GO:0044265)	3/49	0.0389796	0.601369	-2.26571	7.3516	RNASEH2A;HTRA2;SKIV2L
regulation of thymocyte apoptotic process (GO:0070243)	1/7	0.102322	0.601369	-3.18739	7.26607	ZC3H8
nuclear-transcribed mRNA catabolic process, deadenylation-dependent decay (GO:0000288)	4/64	0.0166452	0.526581	-1.77334	7.26297	EIF4A2;HBS1L;CNOT6;SKIV2L
negative regulation of lymphocyte migration (GO:2000402)	1/7	0.102322	0.601369	-3.17782	7.24426	LRCH1
retinal ganglion cell axon guidance (GO:0031290)	1/7	0.102322	0.601369	-3.16437	7.2136	PTPRM
positive regulation of T cell differentiation in thymus (GO:0033089)	1/7	0.102322	0.601369	-3.14311	7.16511	TESPA1
mRNA 3'-end processing (GO:0031124)	5/75	0.00585106	0.306889	-1.38569	7.12399	UPF3B;MTPAP;SRSF6;SRSF7;WDR33
nucleobase metabolic process (GO:0009112)	1/7	0.102322	0.601369	-3.12436	7.12239	UCKL1
negative regulation of microtubule depolymerization (GO:0007026)	2/19	0.0336152	0.601369	-2.088	7.08413	NAV3;ARHGEF2
establishment of endothelial intestinal barrier (GO:0090557)	1/7	0.102322	0.601369	-3.10141	7.07007	TJP2
positive regulation of transcription from RNA polymerase II promoter in response to heat stress (GO:0061408)	1/7	0.102322	0.601369	-3.08946	7.04283	HSF1
ion homeostasis (GO:0050801)	1/8	0.116061	0.601369	-3.26521	7.03208	WNK4
membrane protein ectodomain proteolysis (GO:0006509)	2/19	0.0336152	0.601369	-2.06974	7.02217	BACE1;ERAP1
negative regulation of meiotic cell cycle (GO:0051447)	1/7	0.102322	0.601369	-3.07222	7.00352	FBXO5
regulation of response to wounding (GO:1903034)	1/7	0.102322	0.601369	-3.06273	6.98189	SRSF6
positive regulation of tumor necrosis factor-mediated signaling pathway (GO:1903265)	1/8	0.116061	0.601369	-3.23004	6.95634	CPNE1
regulation of meiotic nuclear division (GO:0040020)	1/8	0.116061	0.601369	-3.22514	6.94578	FBXO5
protein deacylation (GO:0035601)	2/17	0.0272742	0.601369	-1.92202	6.92277	HDAC5;HDAC10
positive regulation of protein acetylation (GO:1901985)	1/7	0.102322	0.601369	-2.97945	6.79203	ARNTL
negative regulation of keratinocyte proliferation (GO:0010839)	1/8	0.116061	0.601369	-3.14724	6.77801	PTPRK
negative regulation of RNA splicing (GO:0033119)	2/19	0.0336152	0.601369	-1.98073	6.72017	SRSF6;SRSF7
negative regulation of macroautophagy (GO:0016242)	2/22	0.0440741	0.601369	-2.14917	6.70946	NRBP2;TSC2
mitochondrial RNA metabolic process (GO:0000959)	2/21	0.0404676	0.601369	-2.08757	6.69535	ELAC2;POLRMT
morphogenesis of an epithelium (GO:0002009)	2/20	0.0369798	0.601369	-2.02645	6.68199	TIMELESS;VCL
cellular response to oxidative stress (GO:0034599)	5/116	0.0329685	0.601369	-1.95109	6.65753	TXNRD1;HTRA2;ROMO1;PTPRK;ARNTL
mRNA 5'-splice site recognition (GO:0000395)	1/7	0.102322	0.601369	-2.90962	6.63286	PRPF39
regulation of small GTPase mediated signal transduction (GO:0051056)	7/141	0.00606638	0.306889	-1.29898	6.63128	RHOT2;FAM13B;PLEKHG5;ARHGEF1;ARHGEF2;GMIP;FGD2
regulation of intracellular signal transduction (GO:1902531)	12/423	0.0303215	0.601369	-1.88206	6.57949	RHOT2;FAM13B;PLEKHG5;EHMT2;CPNE1;ARHGEF1;ARHGEF2;PPP2R5C;INHA;GMIP;AURKA;FGD2
tRNA 3'-end processing (GO:0042780)	1/8	0.116061	0.601369	-3.04216	6.55171	ELAC2
antigen processing and presentation of endogenous peptide antigen (GO:0002483)	1/7	0.102322	0.601369	-2.86313	6.52688	ERAP1
adherens junction assembly (GO:0034333)	1/8	0.116061	0.601369	-3.00241	6.4661	VCL
negative regulation of nitric oxide metabolic process (GO:1904406)	1/8	0.116061	0.601369	-2.99211	6.44391	PTGIS
acylglycerol metabolic process (GO:0006639)	3/37	0.0187769	0.526581	-1.61679	6.42694	DGKD;DGAT1;DGKA
exonucleolytic nuclear-transcribed mRNA catabolic process involved in deadenylation-dependent decay (GO:0043928)	3/34	0.0149528	0.523698	-1.5165	6.37362	HBS1L;CNOT6;SKIV2L
negative regulation of protein depolymerization (GO:1901880)	2/21	0.0404676	0.601369	-1.98722	6.37352	NAV3;ARHGEF2
transmembrane receptor protein tyrosine phosphatase signaling pathway (GO:0007185)	1/7	0.102322	0.601369	-2.76485	6.30284	PTPRF
carbohydrate transport (GO:0008643)	1/7	0.102322	0.601369	-2.74912	6.26698	SLC50A1
polyamine biosynthetic process (GO:0006596)	1/7	0.102322	0.601369	-2.74145	6.24949	SAT1
protein homotrimerization (GO:0070207)	2/23	0.0477949	0.601369	-2.03874	6.19948	HSF1;HTRA2
exit from host cell (GO:0035891)	1/7	0.102322	0.601369	-2.71379	6.18643	IST1
regulation of DNA metabolic process (GO:0051052)	3/47	0.0350715	0.601369	-1.84558	6.18337	SMG1;EHMT2;SMG6
negative regulation of telomere capping (GO:1904354)	1/8	0.116061	0.601369	-2.85463	6.14784	SMG6
positive regulation of mitochondrial membrane permeability involved in apoptotic process (GO:1902110)	1/9	0.129591	0.601369	-3.00719	6.1448	RHOT2
negative regulation of necroptotic process (GO:0060546)	1/7	0.102322	0.601369	-2.69218	6.13717	ARHGEF2
nuclear-transcribed mRNA catabolic process, exonucleolytic (GO:0000291)	3/36	0.0174477	0.526581	-1.50973	6.11221	HBS1L;CNOT6;SKIV2L
negative regulation of glucocorticoid receptor signaling pathway (GO:2000323)	1/7	0.102322	0.601369	-2.66978	6.08611	ARNTL
response to muramyl dipeptide (GO:0032495)	1/10	0.142914	0.601369	-3.12585	6.08136	ARHGEF2
intrinsic apoptotic signaling pathway in response to DNA damage by p53 class mediator (GO:0042771)	2/21	0.0404676	0.601369	-1.89245	6.06957	BAG6;USP28
regulation of establishment of protein localization (GO:0070201)	1/8	0.116061	0.601369	-2.80586	6.04279	SPIDR
negative regulation of cell cycle (GO:0045786)	4/73	0.0256519	0.601369	-1.63988	6.00712	ZBTB17;HTRA2;PTPRK;INHA
positive regulation of smooth muscle cell migration (GO:0014911)	1/11	0.156034	0.601369	-3.21651	5.97524	DOCK4
regulation of microtubule depolymerization (GO:0031114)	2/23	0.0477949	0.601369	-1.95275	5.93798	NAV3;ARHGEF2
muscle tissue development (GO:0060537)	1/7	0.102322	0.601369	-2.60283	5.93348	SRPK3
negative regulation of mRNA processing (GO:0050686)	2/16	0.0243074	0.601369	-1.59067	5.91247	SRSF6;SRSF7
positive regulation of ER-associated ubiquitin-dependent protein catabolic process (GO:1903071)	1/8	0.116061	0.601369	-2.74133	5.90382	HERPUD1
regulation of glucocorticoid receptor signaling pathway (GO:2000322)	1/8	0.116061	0.601369	-2.73217	5.88409	ARNTL
regulation of T cell migration (GO:2000404)	2/18	0.0303784	0.601369	-1.67489	5.85212	LRCH1;DOCK8
regulation of cellular senescence (GO:2000772)	2/25	0.0555619	0.601369	-2.02467	5.85183	RBL1;ARNTL
proteolysis (GO:0006508)	9/292	0.0364016	0.601369	-1.75632	5.81895	BACE1;RNF123;NLN;DPP7;CAPN7;ERAP1;CPNE1;HTRA2;RHBDL3
ethanol catabolic process (GO:0006068)	1/8	0.116061	0.601369	-2.68875	5.79059	SULT2A1
negative regulation of intracellular signal transduction (GO:1902532)	7/162	0.0125064	0.500256	-1.31639	5.76777	ADGRG3;PPM1A;CPNE1;TSC2;PPP2R5C;ARNTL;HERPUD1
snRNA transcription from RNA polymerase III promoter (GO:0042796)	1/7	0.102322	0.601369	-2.51368	5.73025	ZC3H8
lipid modification (GO:0030258)	2/27	0.0637356	0.601369	-2.07551	5.71389	DGKD;DGKA
norepinephrine metabolic process (GO:0042415)	1/9	0.129591	0.601369	-2.78855	5.69803	RNF180
liver development (GO:0001889)	2/32	0.0857442	0.601369	-2.3004	5.65067	ARID5B;AURKA
nucleotide-excision repair, DNA damage recognition (GO:0000715)	2/24	0.0516255	0.601369	-1.90628	5.64972	GPS1;DDB2
macropinocytosis (GO:0044351)	1/7	0.102322	0.601369	-2.46523	5.61982	DOCK2
negative regulation of microtubule polymerization or depolymerization (GO:0031111)	2/28	0.0679649	0.601369	-2.08716	5.61188	NAV3;ARHGEF2
nuclear export (GO:0051168)	5/93	0.0141287	0.520531	-1.31162	5.5869	NUP214;EIF5A;UPF3B;SRSF6;SRSF7
positive regulation of microtubule polymerization (GO:0031116)	2/25	0.0555619	0.601369	-1.93031	5.57909	NAV3;TOGARAM1
replication fork protection (GO:0048478)	1/8	0.116061	0.601369	-2.58745	5.57243	TIMELESS
regulation of protein heterodimerization activity (GO:0043497)	1/8	0.116061	0.601369	-2.56927	5.53326	HSF1
hyperosmotic response (GO:0006972)	1/8	0.116061	0.601369	-2.55676	5.50634	ARHGEF2
RNA transport (GO:0050658)	4/81	0.0357089	0.601369	-1.65176	5.50426	NUP214;UPF3B;SRSF6;SRSF7
DNA repair (GO:0006281)	9/289	0.0344353	0.601369	-1.62555	5.47596	FANCI;SMG1;RNASEH2A;FANCA;TIMELESS;MMS19;FANCG;DDB2;WDR33
regulation of striated muscle cell differentiation (GO:0051153)	1/9	0.129591	0.601369	-2.67581	5.46767	HDAC5
endothelial cell chemotaxis (GO:0035767)	1/10	0.142914	0.601369	-2.80886	5.46467	PLEKHG5
coenzyme A biosynthetic process (GO:0015937)	1/8	0.116061	0.601369	-2.52472	5.43732	PPCDC
cellular hyperosmotic response (GO:0071474)	1/7	0.102322	0.601369	-2.38274	5.43176	ARHGEF2
cellular response to type I interferon (GO:0071357)	4/66	0.0184414	0.526581	-1.35851	5.42476	IRF3;IRAK1;IRF9;IP6K2
membrane invagination (GO:0010324)	1/8	0.116061	0.601369	-2.51601	5.41857	HGS
RNA 3'-end processing (GO:0031123)	4/62	0.0149628	0.523698	-1.2891	5.41703	UPF3B;SRSF6;SRSF7;WDR33
protein dephosphorylation (GO:0006470)	6/126	0.0130405	0.507129	-1.24622	5.4082	PPP1CC;PPM1A;PPP1R12A;PTPRM;PTPRK;PTPRF
positive regulation of mRNA 3'-end processing (GO:0031442)	1/9	0.129591	0.601369	-2.6364	5.38715	HSF1
regulation of skeletal muscle cell differentiation (GO:2001014)	1/10	0.142914	0.601369	-2.76651	5.38226	ARNTL
neuron projection extension (GO:1990138)	2/29	0.0722841	0.601369	-2.02999	5.33308	CPNE1;ULK1
positive regulation of chromatin binding (GO:0035563)	1/9	0.129591	0.601369	-2.59938	5.31149	CDT1
interstrand cross-link repair (GO:0036297)	3/49	0.0389796	0.601369	-1.63022	5.28959	FANCI;FANCA;FANCG
protein localization to cell surface (GO:0034394)	2/23	0.0477949	0.601369	-1.73802	5.28502	PTPRK;VCL
spliceosomal complex assembly (GO:0000245)	3/42	0.0262429	0.601369	-1.44319	5.25372	SRPK3;YTHDC1;SRSF6
regulation of ERAD pathway (GO:1904292)	1/9	0.129591	0.601369	-2.55233	5.21537	BAG6
regulation of autophagy of mitochondrion (GO:1903146)	2/28	0.0679649	0.601369	-1.92562	5.17754	ZBTB17;HTRA2
RNA polyadenylation (GO:0043631)	2/29	0.0722841	0.601369	-1.95848	5.14522	MTPAP;WDR33
regulation of type B pancreatic cell development (GO:2000074)	1/9	0.129591	0.601369	-2.51303	5.13505	ARNTL
pyrimidine nucleobase metabolic process (GO:0006206)	1/9	0.129591	0.601369	-2.50995	5.12876	UCKL1
positive regulation of DNA recombination (GO:0045911)	1/9	0.129591	0.601369	-2.50787	5.12451	MMS19
axoneme assembly (GO:0035082)	2/25	0.0555619	0.601369	-1.76904	5.11297	TOGARAM1;CCDC65
regulation of transcription involved in G1/S transition of mitotic cell cycle (GO:0000083)	2/27	0.0637356	0.601369	-1.85552	5.10828	CDT1;FBXO5
regulation of cellular response to insulin stimulus (GO:1900076)	1/8	0.116061	0.601369	-2.36151	5.08583	TSC2
telomere maintenance via recombination (GO:0000722)	1/11	0.156034	0.601369	-2.73655	5.08364	SMC5
regulation of cytoplasmic mRNA processing body assembly (GO:0010603)	1/9	0.129591	0.601369	-2.47708	5.06158	CNOT6
protein export from nucleus (GO:0006611)	2/29	0.0722841	0.601369	-1.9215	5.04808	NUP214;EIF5A
termination of RNA polymerase II transcription (GO:0006369)	4/69	0.0213536	0.574906	-1.31081	5.04208	UPF3B;SRSF6;SRSF7;WDR33
protein desumoylation (GO:0016926)	1/9	0.129591	0.601369	-2.44119	4.98825	SENP2
positive regulation of microtubule polymerization or depolymerization (GO:0031112)	2/25	0.0555619	0.601369	-1.72584	4.98812	NAV3;TOGARAM1
cellular biogenic amine metabolic process (GO:0006576)	1/11	0.156034	0.601369	-2.66921	4.95853	OAZ1
tRNA methylation (GO:0030488)	2/27	0.0637356	0.601369	-1.79798	4.94987	TRMT5;THUMPD3
purine nucleotide biosynthetic process (GO:0006164)	1/8	0.116061	0.601369	-2.29639	4.94558	AMPD2
positive regulation of autophagosome assembly (GO:2000786)	1/10	0.142914	0.601369	-2.53472	4.93132	RAB3GAP2
positive regulation of execution phase of apoptosis (GO:1900119)	1/11	0.156034	0.601369	-2.6536	4.92953	PTGIS
mitochondrial RNA processing (GO:0000963)	1/7	0.102322	0.601369	-2.15937	4.92256	ELAC2
protein maturation by iron-sulfur cluster transfer (GO:0097428)	1/8	0.116061	0.601369	-2.28364	4.91812	MMS19
dynamin family protein polymerization involved in membrane fission (GO:0003373)	1/10	0.142914	0.601369	-2.52399	4.91045	DNM1
response to dopamine (GO:1903350)	1/10	0.142914	0.601369	-2.51906	4.90085	GABPA
ribosomal large subunit assembly (GO:0000027)	2/31	0.0811773	0.601369	-1.95112	4.89949	RPL10;NLE1
histidine catabolic process (GO:0006548)	1/9	0.129591	0.601369	-2.3857	4.87488	FTCD
negative regulation of necrotic cell death (GO:0060547)	1/8	0.116061	0.601369	-2.25856	4.86412	ARHGEF2
positive regulation of chromosome segregation (GO:0051984)	1/12	0.168954	0.601369	-2.72002	4.83655	SMC5
regulation of extent of cell growth (GO:0061387)	1/7	0.102322	0.601369	-2.12077	4.83456	NRCAM
regulation of microtubule-based movement (GO:0060632)	1/10	0.142914	0.601369	-2.48449	4.8336	CCDC65
regulation of intracellular protein transport (GO:0033157)	2/34	0.0951012	0.601369	-2.05439	4.8336	PCNT;OAZ1
mitotic spindle organization (GO:0007052)	4/75	0.0279821	0.601369	-1.35022	4.82864	CEP126;DCTN2;PCNT;AURKA
regulation of myosin-light-chain-phosphatase activity (GO:0035507)	1/8	0.116061	0.601369	-2.24124	4.82682	PPP1R12A
histidine metabolic process (GO:0006547)	1/9	0.129591	0.601369	-2.36025	4.82287	FTCD
intrinsic apoptotic signaling pathway in response to DNA damage (GO:0008630)	3/49	0.0389796	0.601369	-1.48042	4.80354	BAG6;HTRA2;USP28
regulation of mitochondrion organization (GO:0010821)	3/49	0.0389796	0.601369	-1.47719	4.79305	ZBTB17;RHOT2;HTRA2
tRNA aminoacylation for mitochondrial protein translation (GO:0070127)	1/9	0.129591	0.601369	-2.34303	4.78768	TARS2
JNK cascade (GO:0007254)	4/67	0.0193829	0.53208	-1.21282	4.7826	MAP4K2;IRAK1;GPS1;MAPK8IP3
regulation of vascular associated smooth muscle cell migration (GO:1904752)	1/9	0.129591	0.601369	-2.34048	4.78246	DOCK4
nuclear-transcribed mRNA catabolic process, exonucleolytic, 3'-5' (GO:0034427)	1/10	0.142914	0.601369	-2.45496	4.77615	SKIV2L
viral release from host cell (GO:0019076)	1/7	0.102322	0.601369	-2.08686	4.75725	IST1
Cdc42 protein signal transduction (GO:0032488)	1/10	0.142914	0.601369	-2.4448	4.75637	RHOBTB3
regulation of protein acetylation (GO:1901983)	1/10	0.142914	0.601369	-2.43581	4.7389	ARNTL
translational readthrough (GO:0006451)	1/8	0.116061	0.601369	-2.19984	4.73765	TRNAU1AP
stress-induced premature senescence (GO:0090400)	1/9	0.129591	0.601369	-2.31245	4.72519	ARNTL
negative regulation of phosphatidylinositol 3-kinase signaling (GO:0014067)	1/10	0.142914	0.601369	-2.42442	4.71673	TSC2
RNA metabolic process (GO:0016070)	6/192	0.0752603	0.601369	-1.81726	4.7009	HNRNPL;EIF4A2;HNRNPM;RNASEH2A;SKIV2L;DDX50
insulin-like growth factor receptor signaling pathway (GO:0048009)	1/11	0.156034	0.601369	-2.52439	4.68951	TSC2
positive regulation of exocytosis (GO:0045921)	2/35	0.0998847	0.601369	-2.03425	4.68638	FGA;HGS
oogenesis (GO:0048477)	1/10	0.142914	0.601369	-2.40331	4.67566	FMN2
primary alcohol catabolic process (GO:0034310)	1/11	0.156034	0.601369	-2.51219	4.66685	SULT2A1
cellular macromolecule biosynthetic process (GO:0034645)	10/368	0.0576261	0.601369	-1.63139	4.65563	HBS1L;RNASEH2A;RPL10;RPL22;TIMELESS;NAP1L1;RRBP1;MMS19;INHA;PTMA
cellular response to dopamine (GO:1903351)	1/10	0.142914	0.601369	-2.37445	4.61951	GABPA
regulation of telomere maintenance (GO:0032204)	2/26	0.0595999	0.601369	-1.63501	4.6109	SMG1;SMG6
regulation of NIK/NF-kappaB signaling (GO:1901222)	2/29	0.0722841	0.601369	-1.75394	4.60787	ADGRG3;CPNE1
ethanol metabolic process (GO:0006067)	1/8	0.116061	0.601369	-2.13857	4.60571	SULT2A1
positive regulation of mitotic metaphase/anaphase transition (GO:0045842)	1/9	0.129591	0.601369	-2.25383	4.60541	CDT1
negative regulation of vascular endothelial growth factor receptor signaling pathway (GO:0030948)	1/10	0.142914	0.601369	-2.35656	4.5847	HGS
ribonucleoside bisphosphate biosynthetic process (GO:0034030)	1/8	0.116061	0.601369	-2.12602	4.57867	PPCDC
mRNA polyadenylation (GO:0006378)	2/28	0.0679649	0.601369	-1.69884	4.56779	MTPAP;WDR33
imidazole-containing compound catabolic process (GO:0052805)	1/9	0.129591	0.601369	-2.233	4.56284	FTCD
negative regulation of T cell differentiation (GO:0045581)	1/12	0.168954	0.601369	-2.566	4.56268	ZC3H8
glycerolipid biosynthetic process (GO:0045017)	1/9	0.129591	0.601369	-2.22965	4.55601	CPNE1
mRNA cleavage (GO:0006379)	1/9	0.129591	0.601369	-2.21856	4.53335	WDR33
negative regulation of GTPase activity (GO:0034260)	2/23	0.0477949	0.601369	-1.48989	4.5305	LRCH1;GMIP
cellular response to UV (GO:0034644)	3/68	0.0861406	0.601369	-1.84634	4.5268	PTPRK;USP28;DDB2
detection of mechanical stimulus involved in sensory perception (GO:0050974)	1/10	0.142914	0.601369	-2.31905	4.51174	KCNK4
regulation of cysteine-type endopeptidase activity involved in apoptotic signaling pathway (GO:2001267)	1/10	0.142914	0.601369	-2.31652	4.50681	HTRA2
dynamin family protein polymerization involved in mitochondrial fission (GO:0003374)	1/10	0.142914	0.601369	-2.31371	4.50135	DNM1
regulation of double-strand break repair via homologous recombination (GO:0010569)	2/28	0.0679649	0.601369	-1.67156	4.49442	MMS19;SPIDR
protein deacetylation (GO:0006476)	2/33	0.0903866	0.601369	-1.86325	4.47861	HDAC5;HDAC10
isoprenoid metabolic process (GO:0006720)	1/9	0.129591	0.601369	-2.18714	4.46913	GGPS1
adipose tissue development (GO:0060612)	1/10	0.142914	0.601369	-2.29668	4.46821	ARID5B
selenocysteine incorporation (GO:0001514)	1/8	0.116061	0.601369	-2.07211	4.46257	TRNAU1AP
pinocytosis (GO:0006907)	1/10	0.142914	0.601369	-2.28862	4.45253	DOCK2
neuronal ion channel clustering (GO:0045161)	1/10	0.142914	0.601369	-2.2685	4.41339	NRCAM
antigen processing and presentation of peptide antigen via MHC class I (GO:0002474)	2/29	0.0722841	0.601369	-1.67595	4.40298	ERAP1;IFI30
chromosome organization (GO:0051276)	3/57	0.0566964	0.601369	-1.53115	4.39446	CDT1;GPS1;DDB2
protein deneddylation (GO:0000338)	1/11	0.156034	0.601369	-2.34293	4.35241	GPS1
mRNA metabolic process (GO:0016071)	4/98	0.0636503	0.601369	-1.57671	4.34281	SON;HSF1;SRSF7;WDR33
DNA damage induced protein phosphorylation (GO:0006975)	1/9	0.129591	0.601369	-2.12093	4.33384	MAPK12
positive regulation of organelle organization (GO:0010638)	2/34	0.0951012	0.601369	-1.83486	4.31708	RAB3GAP2;HTRA2
coenzyme A metabolic process (GO:0015936)	1/11	0.156034	0.601369	-2.31855	4.30712	PPCDC
neuron projection fasciculation (GO:0106030)	1/11	0.156034	0.601369	-2.31452	4.29963	NRCAM
positive regulation of T cell apoptotic process (GO:0070234)	1/11	0.156034	0.601369	-2.30988	4.29102	ZC3H8
regulation of receptor binding (GO:1900120)	1/9	0.129591	0.601369	-2.09528	4.28143	PTPRF
ER to Golgi vesicle-mediated transport (GO:0006888)	6/181	0.0601437	0.601369	-1.51309	4.25332	SPTA1;NRBP2;SEC23IP;DCTN2;COG1;SPTAN1
nerve growth factor signaling pathway (GO:0038180)	1/11	0.156034	0.601369	-2.2885	4.2513	KIDINS220
negative regulation of cellular senescence (GO:2000773)	1/12	0.168954	0.601369	-2.38815	4.24644	RBL1
positive regulation of vacuole organization (GO:0044090)	1/11	0.156034	0.601369	-2.2818	4.23886	RAB3GAP2
UV-damage excision repair (GO:0070914)	1/12	0.168954	0.601369	-2.38119	4.23405	DDB2
regulation of RNA splicing (GO:0043484)	3/56	0.0543039	0.601369	-1.44395	4.20644	CLK1;SON;YTHDC1
positive regulation of circadian rhythm (GO:0042753)	1/11	0.156034	0.601369	-2.26091	4.20004	ARNTL
histone mRNA catabolic process (GO:0071044)	1/12	0.168954	0.601369	-2.34915	4.17709	MTPAP
regulation of ER-associated ubiquitin-dependent protein catabolic process (GO:1903069)	1/10	0.142914	0.601369	-2.14126	4.16584	HERPUD1
nuclear-transcribed mRNA poly(A) tail shortening (GO:0000289)	2/30	0.0766894	0.601369	-1.61236	4.14053	EIF4A2;CNOT6
positive regulation of mesenchymal cell proliferation (GO:0002053)	1/12	0.168954	0.601369	-2.31336	4.11345	CHRD
positive regulation of T cell receptor signaling pathway (GO:0050862)	1/11	0.156034	0.601369	-2.2078	4.10138	TESPA1
positive regulation of DNA-dependent DNA replication (GO:2000105)	1/13	0.181677	0.601369	-2.40216	4.09695	CDT1
internal protein amino acid acetylation (GO:0006475)	1/12	0.168954	0.601369	-2.30291	4.09487	BAG6
activation of JUN kinase activity (GO:0007257)	2/31	0.0811773	0.601369	-1.6234	4.07655	MAP4K2;MAPK8IP3
positive regulation of transcription from RNA polymerase III promoter (GO:0045945)	1/11	0.156034	0.601369	-2.19229	4.07256	ZC3H8
positive regulation of protein transport (GO:0051222)	3/57	0.0566964	0.601369	-1.41673	4.06606	FGA;PCNT;OAZ1
macromolecular complex assembly (GO:0065003)	5/121	0.0384678	0.601369	-1.24736	4.0638	FGA;HSF1;FANCA;DNAJB14;WASF3
positive regulation of cellular protein metabolic process (GO:0032270)	4/92	0.0527718	0.601369	-1.37951	4.05821	IST1;ASPSCR1;PYM1;UPF3B
positive regulation of ion transmembrane transport (GO:0034767)	1/10	0.142914	0.601369	-2.08562	4.0576	WNK4
negative regulation of meiotic nuclear division (GO:0045835)	1/7	0.102322	0.601369	-1.77538	4.04722	FBXO5
cellular response to arsenic-containing substance (GO:0071243)	1/13	0.181677	0.601369	-2.36386	4.03162	HSF1
secondary alcohol biosynthetic process (GO:1902653)	2/37	0.109646	0.601369	-1.82367	4.03121	GGPS1;HSD17B7
very-low-density lipoprotein particle assembly (GO:0034379)	1/11	0.156034	0.601369	-2.16051	4.01354	DGAT1
regulation of chromatin binding (GO:0035561)	1/12	0.168954	0.601369	-2.25082	4.00225	CDT1
phosphatidylinositol phosphorylation (GO:0046854)	2/28	0.0679649	0.601369	-1.48795	4.00074	SMG1;IP6K2
regulation of protein complex assembly (GO:0043254)	3/74	0.104423	0.601369	-1.76645	3.99095	CDT1;ULK1;SPIDR
metallo-sulfur cluster assembly (GO:0031163)	1/15	0.206543	0.601369	-2.52747	3.98645	MMS19
attachment of mitotic spindle microtubules to kinetochore (GO:0051315)	1/12	0.168954	0.601369	-2.23799	3.97944	CDT1
platelet aggregation (GO:0070527)	2/34	0.0951012	0.601369	-1.68715	3.96954	FGA;VCL
T cell homeostasis (GO:0043029)	1/11	0.156034	0.601369	-2.13661	3.96914	ZC3H8
ESCRT complex disassembly (GO:1904896)	1/11	0.156034	0.601369	-2.13329	3.96297	IST1
multivesicular body assembly (GO:0036258)	2/31	0.0811773	0.601369	-1.57802	3.9626	HGS;IST1
positive regulation of skeletal muscle tissue development (GO:0048643)	1/13	0.181677	0.601369	-2.30964	3.93914	ARNTL
male meiosis I (GO:0007141)	1/11	0.156034	0.601369	-2.12045	3.93912	SYCP3
kinetochore organization (GO:0051383)	1/13	0.181677	0.601369	-2.30526	3.93168	CDT1
protein trimerization (GO:0070206)	2/33	0.0903866	0.601369	-1.63181	3.92232	HSF1;HTRA2
dephosphorylation (GO:0016311)	5/125	0.0432475	0.601369	-1.24304	3.90415	PPP1CC;PPM1A;PPP1R12A;PTPRM;PTPRK
double-strand break repair via homologous recombination (GO:0000724)	3/77	0.11409	0.601369	-1.79253	3.89118	SFR1;SMC5;SPIDR
T cell proliferation (GO:0042098)	1/12	0.168954	0.601369	-2.1792	3.87489	DOCK8
negative regulation of fat cell differentiation (GO:0045599)	2/33	0.0903866	0.601369	-1.60403	3.85555	ASXL1;ARNTL
regulation of double-strand break repair (GO:2000779)	2/35	0.0998847	0.601369	-1.67132	3.85028	TIMELESS;SPIDR
regulation of lipid kinase activity (GO:0043550)	1/12	0.168954	0.601369	-2.15381	3.82975	RBL1
endonucleolytic cleavage of tricistronic rRNA transcript (SSU-rRNA, 5.8S rRNA, LSU-rRNA) (GO:0000479)	1/12	0.168954	0.601369	-2.15175	3.82608	TSR1
negative regulation of extrinsic apoptotic signaling pathway via death domain receptors (GO:1902042)	2/32	0.0857442	0.601369	-1.54583	3.79715	FGA;ARHGEF2
positive regulation of DNA repair (GO:0045739)	2/39	0.119645	0.601369	-1.78704	3.79429	TIMELESS;SPIDR
multivesicular body organization (GO:0036257)	2/32	0.0857442	0.601369	-1.53893	3.78021	HGS;IST1
cyclooxygenase pathway (GO:0019371)	1/12	0.168954	0.601369	-2.11253	3.75636	PTGIS
cellular response to interferon-beta (GO:0035458)	1/12	0.168954	0.601369	-2.11103	3.75368	HTRA2
carboxylic acid metabolic process (GO:0019752)	2/34	0.0951012	0.601369	-1.58955	3.73992	PTGIS;FTCD
negative regulation of myotube differentiation (GO:0010832)	1/12	0.168954	0.601369	-2.103	3.73941	HDAC5
regulation of synaptic transmission, GABAergic (GO:0032228)	1/12	0.168954	0.601369	-2.10269	3.73885	NPAS4
regulation of mesenchymal cell proliferation (GO:0010464)	1/13	0.181677	0.601369	-2.18798	3.73166	CHRD
negative regulation of protein complex assembly (GO:0031333)	2/36	0.104734	0.601369	-1.64919	3.72111	PPM1A;ULK1
cellular response to calcium ion (GO:0071277)	2/43	0.140267	0.601369	-1.87852	3.68981	CPNE1;BRAF
synaptonemal complex assembly (GO:0007130)	1/12	0.168954	0.601369	-2.07047	3.68156	BAG6
cholesterol biosynthetic process (GO:0006695)	2/36	0.104734	0.601369	-1.63113	3.68037	GGPS1;HSD17B7
negative regulation of nuclear division (GO:0051784)	1/12	0.168954	0.601369	-2.06176	3.66608	FBXO5
glycerolipid metabolic process (GO:0046486)	1/11	0.156034	0.601369	-1.96967	3.65902	DGKA
regulation of cilium movement (GO:0003352)	1/9	0.129591	0.601369	-1.79024	3.65812	CCDC65
ESCRT III complex disassembly (GO:1904903)	1/11	0.156034	0.601369	-1.96867	3.65716	IST1
negative regulation of supramolecular fiber organization (GO:1902904)	3/55	0.0519613	0.601369	-1.23643	3.65644	NAV3;ARHGEF2;KANK3
regulation of execution phase of apoptosis (GO:1900117)	1/14	0.194205	0.601369	-2.23034	3.65517	PTGIS
cofactor biosynthetic process (GO:0051188)	2/32	0.0857442	0.601369	-1.4838	3.64479	MMS19;PPCDC
positive regulation of neuron migration (GO:2001224)	1/13	0.181677	0.601369	-2.1266	3.62697	ARHGEF2
positive regulation of peptidase activity (GO:0010952)	1/13	0.181677	0.601369	-2.12546	3.62503	MAPK12
retrograde transport, endosome to plasma membrane (GO:1990126)	1/15	0.206543	0.601369	-2.29823	3.62488	SDCCAG3
sulfation (GO:0051923)	1/13	0.181677	0.601369	-2.12376	3.62213	SULT2A1
regulation of extrinsic apoptotic signaling pathway via death domain receptors (GO:1902041)	2/40	0.124727	0.601369	-1.73112	3.60356	FGA;ARHGEF2
mitochondrial outer membrane permeabilization (GO:0097345)	1/13	0.181677	0.601369	-2.10304	3.58679	RHOT2
endosome organization (GO:0007032)	2/37	0.109646	0.601369	-1.61599	3.57215	HOOK2;DNM1
cellular glucan metabolic process (GO:0006073)	1/13	0.181677	0.601369	-2.09381	3.57104	GBE1
negative regulation of nitric oxide biosynthetic process (GO:0045019)	1/8	0.116061	0.601369	-1.65717	3.56893	PTGIS
histone deacetylation (GO:0016575)	2/37	0.109646	0.601369	-1.60989	3.55867	HDAC5;HDAC10
protein modification by small protein removal (GO:0070646)	8/262	0.0491017	0.601369	-1.16395	3.508	ASXL1;RNF123;HGS;GPS1;JOSD2;USP28;SENP2;DDB2
inositol phosphate metabolic process (GO:0043647)	2/48	0.166993	0.601369	-1.95892	3.50608	PLCB3;IP6K2
acylglycerol acyl-chain remodeling (GO:0036155)	1/9	0.129591	0.601369	-1.71355	3.50142	DGAT1
negative regulation of reactive oxygen species biosynthetic process (GO:1903427)	1/14	0.194205	0.601369	-2.12627	3.48462	PTGIS
intestinal absorption (GO:0050892)	1/14	0.194205	0.601369	-2.12612	3.48438	TJP2
hydrogen peroxide catabolic process (GO:0042744)	1/15	0.206543	0.601369	-2.20876	3.48377	PXDN
neutrophil degranulation (GO:0043312)	11/480	0.120418	0.601369	-1.64403	3.48006	GALNS;ADGRG3;TSPAN14;DPP7;DGAT1;IST1;TBC1D10C;CPNE1;DOCK2;SPTAN1;VCL
regulation of chromatin silencing (GO:0031935)	1/12	0.168954	0.601369	-1.95678	3.47941	ATAD2B
DNA-templated transcription, termination (GO:0006353)	4/107	0.0819862	0.601369	-1.39022	3.47721	UPF3B;SRSF6;SRSF7;WDR33
mitochondrion transport along microtubule (GO:0047497)	1/13	0.181677	0.601369	-2.03239	3.4663	RHOT2
stress-activated MAPK cascade (GO:0051403)	3/63	0.0720672	0.601369	-1.30157	3.42333	MAP4K2;IRAK1;GPS1
regulation of mitotic cell cycle spindle assembly checkpoint (GO:0090266)	1/15	0.206543	0.601369	-2.16508	3.41488	CDT1
recombinational repair (GO:0000725)	3/72	0.0981681	0.601369	-1.47076	3.41375	SFR1;SMC5;SPIDR
anoikis (GO:0043276)	1/10	0.142914	0.601369	-1.75466	3.41372	TSC2
regulation of macroautophagy (GO:0016241)	4/117	0.105054	0.601369	-1.51308	3.40939	NRBP2;ATG101;TSC2;ULK1
positive regulation of heterotypic cell-cell adhesion (GO:0034116)	1/12	0.168954	0.601369	-1.91133	3.39859	FGA
regulation of cellular response to stress (GO:0080135)	4/105	0.0777072	0.601369	-1.32764	3.39186	NUP214;SMG1;HSF1;ARNTL
pyrimidine nucleoside salvage (GO:0043097)	1/13	0.181677	0.601369	-1.98273	3.3816	UCKL1
negative regulation of protein kinase B signaling (GO:0051898)	2/36	0.104734	0.601369	-1.49737	3.37857	TSC2;PPP2R5C
plasminogen activation (GO:0031639)	1/13	0.181677	0.601369	-1.9767	3.37131	FGA
establishment of chromosome localization (GO:0051303)	1/14	0.194205	0.601369	-2.05664	3.3705	KIF22
negative regulation of epidermal growth factor-activated receptor activity (GO:0007175)	1/14	0.194205	0.601369	-2.05185	3.36265	ZGPAT
mRNA splicing, via spliceosome (GO:0000398)	7/262	0.108579	0.601369	-1.51088	3.35456	HNRNPL;SRPK3;HNRNPM;UPF3B;SRSF6;SRSF7;WDR33
purine nucleoside bisphosphate biosynthetic process (GO:0034033)	1/8	0.116061	0.601369	-1.55585	3.35073	PPCDC
peptidyl-lysine acetylation (GO:0018394)	1/9	0.129591	0.601369	-1.63945	3.35001	BAG6
regulation of platelet-derived growth factor receptor signaling pathway (GO:0010640)	1/11	0.156034	0.601369	-1.80202	3.34758	HGS
mitochondrial tRNA modification (GO:0070900)	1/9	0.129591	0.601369	-1.63577	3.34249	TRMT5
N-terminal protein amino acid acetylation (GO:0006474)	1/16	0.218692	0.601369	-2.19715	3.33987	NAA40
negative regulation of intrinsic apoptotic signaling pathway (GO:2001243)	3/63	0.0720672	0.601369	-1.26928	3.33841	HTRA2;ARHGEF2;HERPUD1
regulation of mRNA polyadenylation (GO:1900363)	1/12	0.168954	0.601369	-1.87397	3.33216	HSF1
regulation of catabolic process (GO:0009894)	1/13	0.181677	0.601369	-1.95108	3.32762	HGS
amyloid-beta metabolic process (GO:0050435)	1/15	0.206543	0.601369	-2.10443	3.31921	BACE1
response to reactive oxygen species (GO:0000302)	3/61	0.0667539	0.601369	-1.22622	3.31907	TXNRD1;ROMO1;PTPRK
homotypic cell-cell adhesion (GO:0034109)	2/39	0.119645	0.601369	-1.56263	3.31782	FGA;VCL
axonal fasciculation (GO:0007413)	1/13	0.181677	0.601369	-1.93491	3.30004	NRCAM
prostanoid biosynthetic process (GO:0046457)	1/14	0.194205	0.601369	-2.00778	3.29043	PTGIS
monosaccharide transport (GO:0015749)	1/15	0.206543	0.601369	-2.07293	3.26953	SLC50A1
sodium ion import across plasma membrane (GO:0098719)	1/16	0.218692	0.601369	-2.15065	3.26918	SLC9A5
renal absorption (GO:0070293)	1/14	0.194205	0.601369	-1.99476	3.2691	WNK4
neurotransmitter receptor internalization (GO:0099590)	1/11	0.156034	0.601369	-1.74953	3.25007	DNM1
negative regulation of cell motility (GO:2000146)	4/98	0.0636503	0.601369	-1.17682	3.24136	NAV3;CHRD;PTPRK;VCL
regulation of transferase activity (GO:0051338)	1/15	0.206543	0.601369	-2.0523	3.23699	SMG6
negative regulation of endoplasmic reticulum stress-induced intrinsic apoptotic signaling pathway (GO:1902236)	1/15	0.206543	0.601369	-2.04963	3.23278	HERPUD1
pyrimidine-containing compound metabolic process (GO:0072527)	1/16	0.218692	0.601369	-2.12516	3.23044	UCKL1
regulation of retinoic acid receptor signaling pathway (GO:0048385)	1/14	0.194205	0.601369	-1.95614	3.20581	ASXL1
synaptonemal complex organization (GO:0070193)	1/12	0.168954	0.601369	-1.80264	3.20532	BAG6
purine-containing compound salvage (GO:0043101)	1/15	0.206543	0.601369	-2.01322	3.17535	AMPD2
regulation of DNA-templated transcription in response to stress (GO:0043620)	1/14	0.194205	0.601369	-1.9297	3.16247	HSF1
protein maturation (GO:0051604)	3/84	0.137871	0.601369	-1.58943	3.14936	TSPAN14;MMS19;RHBDL3
RNA catabolic process (GO:0006401)	2/44	0.145536	0.601369	-1.63333	3.14797	RNASEH2A;SKIV2L
sterol biosynthetic process (GO:0016126)	2/41	0.12986	0.601369	-1.54019	3.144	GGPS1;HSD17B7
cellular response to heat (GO:0034605)	2/48	0.166993	0.601369	-1.75512	3.14132	HSF1;HTRA2
neutrophil mediated immunity (GO:0002446)	11/488	0.130556	0.601369	-1.5302	3.11541	GALNS;ADGRG3;TSPAN14;DPP7;DGAT1;IST1;TBC1D10C;CPNE1;DOCK2;SPTAN1;VCL
negative regulation of receptor binding (GO:1900121)	1/12	0.168954	0.601369	-1.7516	3.11457	PTPRF
ER-associated misfolded protein catabolic process (GO:0071712)	1/14	0.194205	0.601369	-1.89899	3.11214	BAG6
regulation of double-strand break repair via nonhomologous end joining (GO:2001032)	1/13	0.181677	0.601369	-1.82247	3.10827	HSF1
peptidyl-lysine dimethylation (GO:0018027)	1/11	0.156034	0.601369	-1.66953	3.10145	EHMT2
regulation of hair cycle (GO:0042634)	1/10	0.142914	0.601369	-1.59157	3.09641	ARNTL
negative regulation of cell aging (GO:0090344)	1/16	0.218692	0.601369	-2.0317	3.08837	RBL1
positive regulation of neurogenesis (GO:0050769)	3/70	0.0920722	0.601369	-1.28932	3.07525	CPNE1;NRCAM;ARHGEF2
immune response-regulating cell surface receptor signaling pathway (GO:0002768)	1/12	0.168954	0.601369	-1.72573	3.06856	BAG6
sodium ion import (GO:0097369)	1/16	0.218692	0.601369	-2.01772	3.06712	SLC9A5
DNA replication-independent nucleosome organization (GO:0034724)	1/14	0.194205	0.601369	-1.86316	3.05341	CABIN1
protein polymerization (GO:0051258)	2/46	0.156193	0.601369	-1.64451	3.0533	FGA;WASF3
regulation of GTPase activity (GO:0043087)	6/189	0.0709412	0.601369	-1.15108	3.04564	LRCH1;DOCK8;RAB3GAP2;GMIP;RASIP1;FGD2
positive regulation of mitotic nuclear division (GO:0045840)	2/41	0.12986	0.601369	-1.4877	3.03684	SMC5;AURKA
regulation of TOR signaling (GO:0032006)	3/68	0.0861406	0.601369	-1.23643	3.03145	TSC2;WDR24;ARNTL
positive regulation of cellular protein localization (GO:1903829)	3/67	0.0832383	0.601369	-1.21094	3.01045	CDT1;PCNT;OAZ1
positive regulation of neuron differentiation (GO:0045666)	4/99	0.0655694	0.601369	-1.1044	3.00911	KIDINS220;CPNE1;NRCAM;ARHGEF2
cellular response to osmotic stress (GO:0071470)	1/15	0.206543	0.601369	-1.90433	3.0036	ARHGEF2
posttranscriptional regulation of gene expression (GO:0010608)	2/45	0.150846	0.601369	-1.58737	3.0025	RPL10;YTHDC1
regulation of organelle organization (GO:0033043)	4/114	0.0978486	0.601369	-1.29174	3.00245	CDT1;RHOT2;TBC1D10C;RUNDC1
regulation of microtubule polymerization (GO:0031113)	2/36	0.104734	0.601369	-1.32989	3.00067	NAV3;TOGARAM1
long-term memory (GO:0007616)	1/18	0.242436	0.601369	-2.11386	2.99537	NPAS4
keratan sulfate catabolic process (GO:0042340)	1/13	0.181677	0.601369	-1.75285	2.98953	GALNS
negative regulation of interleukin-2 production (GO:0032703)	1/16	0.218692	0.601369	-1.96539	2.98758	NAV3
protein kinase C-activating G-protein coupled receptor signaling pathway (GO:0007205)	1/13	0.181677	0.601369	-1.75094	2.98628	DGKD
membrane protein proteolysis (GO:0033619)	2/36	0.104734	0.601369	-1.32235	2.98366	BACE1;ERAP1
negative regulation of cell migration involved in sprouting angiogenesis (GO:0090051)	1/15	0.206543	0.601369	-1.87958	2.96456	HDAC5
nucleoside salvage (GO:0043174)	1/15	0.206543	0.601369	-1.87804	2.96213	UCKL1
toll-like receptor 9 signaling pathway (GO:0034162)	1/14	0.194205	0.601369	-1.80394	2.95636	IRAK1
mitotic metaphase plate congression (GO:0007080)	2/44	0.145536	0.601369	-1.52646	2.942	CDT1;KIF22
regulation of macrophage differentiation (GO:0045649)	1/14	0.194205	0.601369	-1.79471	2.94124	INHA
cell cycle G2/M phase transition (GO:0044839)	4/128	0.133422	0.601369	-1.45842	2.93761	PPP1R12A;DCTN2;PCNT;AURKA
regulation of systemic arterial blood pressure (GO:0003073)	1/13	0.181677	0.601369	-1.71017	2.91673	PLCB3
DNA methylation or demethylation (GO:0044728)	1/17	0.230655	0.601369	-1.98445	2.91086	EHMT2
coenzyme metabolic process (GO:0006732)	2/52	0.188947	0.601369	-1.74647	2.91013	PPCDC;FTCD
regulation of mRNA metabolic process (GO:1903311)	1/16	0.218692	0.601369	-1.91321	2.90825	SRPK3
pyrimidine-containing compound salvage (GO:0008655)	1/13	0.181677	0.601369	-1.70125	2.90153	UCKL1
interferon-gamma-mediated signaling pathway (GO:0060333)	3/71	0.0950999	0.601369	-1.23089	2.89608	IRF3;IFI30;IRF9
positive regulation of protein complex assembly (GO:0031334)	3/89	0.155797	0.601369	-1.5549	2.89087	CDT1;SPIDR;DDB2
negative regulation of chromatin silencing (GO:0031936)	1/10	0.142914	0.601369	-1.48349	2.88615	ATAD2B
iron-sulfur cluster assembly (GO:0016226)	1/19	0.254037	0.601369	-2.10052	2.87829	MMS19
negative regulation of epidermal growth factor receptor signaling pathway (GO:0042059)	2/41	0.12986	0.601369	-1.40766	2.87347	ZGPAT;HGS
regulation of exosomal secretion (GO:1903541)	1/17	0.230655	0.601369	-1.95183	2.863	HGS
cellular response to ionizing radiation (GO:0071479)	2/47	0.161577	0.601369	-1.56878	2.85953	HSF1;SPIDR
negative regulation of DNA-dependent DNA replication (GO:2000104)	1/16	0.218692	0.601369	-1.87324	2.8475	TIMELESS
nucleic acid metabolic process (GO:0090304)	3/81	0.127479	0.601369	-1.38093	2.84443	HNRNPL;HNRNPM;MMS19
regulation of B cell differentiation (GO:0045577)	1/16	0.218692	0.601369	-1.86835	2.84007	INHA
regulation of interferon-gamma biosynthetic process (GO:0045072)	1/15	0.206543	0.601369	-1.79722	2.83466	INHA
positive regulation of vasoconstriction (GO:0045907)	1/16	0.218692	0.601369	-1.86026	2.82777	FGA
pyrimidine nucleoside biosynthetic process (GO:0046134)	1/16	0.218692	0.601369	-1.8599	2.82721	UCKL1
cellular response to peptide (GO:1901653)	2/42	0.13504	0.601369	-1.40945	2.82197	TIMELESS;ARHGEF2
response to fatty acid (GO:0070542)	1/14	0.194205	0.601369	-1.70867	2.80024	KCNK4
N-terminal protein amino acid modification (GO:0031365)	1/18	0.242436	0.601369	-1.97439	2.79774	NAA40
negative regulation of TOR signaling (GO:0032007)	2/41	0.12986	0.601369	-1.36971	2.79599	TSC2;ARNTL
regulation of autophagy (GO:0010506)	6/204	0.093994	0.601369	-1.18013	2.79045	ZBTB17;ATG101;HTRA2;ULK1;WDR24;RASIP1
positive regulation of cell cycle arrest (GO:0071158)	3/83	0.134376	0.601369	-1.38648	2.78282	ZBTB17;CNOT6;AURKA
protein localization to microtubule organizing center (GO:1905508)	1/17	0.230655	0.601369	-1.89598	2.78108	DCTN2
filopodium assembly (GO:0046847)	1/16	0.218692	0.601369	-1.82637	2.77625	FGD2
positive regulation of antigen receptor-mediated signaling pathway (GO:0050857)	1/17	0.230655	0.601369	-1.88711	2.76807	TESPA1
regulation of ion transmembrane transporter activity (GO:0032412)	2/43	0.140267	0.601369	-1.40777	2.76515	WNK4;UTRN
regulation of gene expression, epigenetic (GO:0040029)	3/75	0.107608	0.601369	-1.23936	2.76285	HDAC5;AEBP2;SLC50A1
positive regulation of intracellular transport (GO:0032388)	2/45	0.150846	0.601369	-1.45847	2.75869	PCNT;OAZ1
regulation of nucleocytoplasmic transport (GO:0046822)	1/15	0.206543	0.601369	-1.7479	2.75687	NUP214
regulation of DNA-dependent DNA replication (GO:0090329)	1/13	0.181677	0.601369	-1.61297	2.75097	CDT1
hexose transport (GO:0008645)	1/17	0.230655	0.601369	-1.87201	2.74592	SLC50A1
stabilization of membrane potential (GO:0030322)	1/17	0.230655	0.601369	-1.87161	2.74533	KCNK4
negative regulation of autophagy (GO:0010507)	2/47	0.161577	0.601369	-1.50506	2.74339	NRBP2;RASIP1
ribonucleoprotein complex assembly (GO:0022618)	5/157	0.0937852	0.601369	-1.15626	2.73658	SRPK3;RPL10;YTHDC1;SRSF6;NLE1
inactivation of MAPK activity (GO:0000188)	1/21	0.276711	0.60193	-2.12526	2.7305	GPS1
cellular response to pH (GO:0071467)	1/17	0.230655	0.601369	-1.85898	2.72681	KCNK4
Golgi vesicle transport (GO:0048193)	7/272	0.125156	0.601369	-1.31187	2.72633	SPTA1;NRBP2;SEC23IP;DCTN2;COG1;KIF22;SPTAN1
BMP signaling pathway (GO:0030509)	3/82	0.130911	0.601369	-1.34009	2.72471	CHRD;HFE2;INHA
DNA alkylation (GO:0006305)	1/17	0.230655	0.601369	-1.85096	2.71504	EHMT2
chromatin assembly or disassembly (GO:0006333)	1/14	0.194205	0.601369	-1.65258	2.70831	HIRIP3
positive regulation of macroautophagy (GO:0016239)	2/45	0.150846	0.601369	-1.42094	2.68771	RAB3GAP2;TSC2
response to unfolded protein (GO:0006986)	2/44	0.145536	0.601369	-1.38303	2.66557	HSF1;HERPUD1
regulation of cell development (GO:0060284)	1/21	0.276711	0.60193	-2.06672	2.65528	ARNTL
cellular iron ion homeostasis (GO:0006879)	2/57	0.216882	0.601369	-1.73452	2.65105	MT-RNR2;HFE2
regulation of hydrolase activity (GO:0051336)	3/81	0.127479	0.601369	-1.28538	2.64763	RAB3GAP2;RASIP1;FGD2
negative regulation of telomere maintenance (GO:0032205)	1/18	0.242436	0.601369	-1.86111	2.63723	SMG6
endoplasmic reticulum to cytosol transport (GO:1903513)	1/17	0.230655	0.601369	-1.79512	2.63314	HERPUD1
retrograde protein transport, ER to cytosol (GO:0030970)	1/19	0.254037	0.601369	-1.91548	2.62474	HERPUD1
peptidyl-threonine dephosphorylation (GO:0035970)	1/17	0.230655	0.601369	-1.78718	2.62149	PPM1A
purine ribonucleoside bisphosphate metabolic process (GO:0034035)	1/20	0.265461	0.601369	-1.97523	2.61972	SULT2A1
Rho protein signal transduction (GO:0007266)	3/73	0.101276	0.601369	-1.13884	2.60783	RHOT2;RHOBTB3;ARHGEF1
epithelial cell-cell adhesion (GO:0090136)	1/12	0.168954	0.601369	-1.46609	2.6069	VCL
nucleobase-containing compound catabolic process (GO:0034655)	2/44	0.145536	0.601369	-1.34795	2.59794	RNASEH2A;SKIV2L
DNA metabolic process (GO:0006259)	8/315	0.111898	0.601369	-1.18564	2.59674	SMG1;RNASEH2A;FANCA;TIMELESS;NAP1L1;MMS19;FANCG;DDB2
positive regulation of phosphoprotein phosphatase activity (GO:0032516)	1/16	0.218692	0.601369	-1.7066	2.59418	PPP1R12A
fibrinolysis (GO:0042730)	1/17	0.230655	0.601369	-1.76796	2.5933	FGA
lipopolysaccharide-mediated signaling pathway (GO:0031663)	1/17	0.230655	0.601369	-1.76589	2.59027	IRAK1
regulation of cell aging (GO:0090342)	1/14	0.194205	0.601369	-1.57429	2.58002	ARNTL
negative regulation of NF-kappaB import into nucleus (GO:0042347)	1/17	0.230655	0.601369	-1.7584	2.57928	PPM1A
histone H2A monoubiquitination (GO:0035518)	1/18	0.242436	0.601369	-1.81687	2.57454	DDB2
toll-like receptor 4 signaling pathway (GO:0034142)	1/16	0.218692	0.601369	-1.69164	2.57144	IRAK1
macrophage activation (GO:0042116)	1/18	0.242436	0.601369	-1.81171	2.56722	SBNO2
regulation of RNA metabolic process (GO:0051252)	2/40	0.124727	0.601369	-1.22994	2.56029	CLK1;SON
catecholamine metabolic process (GO:0006584)	1/16	0.218692	0.601369	-1.68218	2.55707	RNF180
intrinsic apoptotic signaling pathway by p53 class mediator (GO:0072332)	2/44	0.145536	0.601369	-1.32606	2.55575	BAG6;USP28
cellular biogenic amine biosynthetic process (GO:0042401)	1/16	0.218692	0.601369	-1.67841	2.55134	SAT1
NAD biosynthesis via nicotinamide riboside salvage pathway (GO:0034356)	1/16	0.218692	0.601369	-1.67836	2.55126	PTGIS
positive regulation of translation (GO:0045727)	3/79	0.120715	0.601369	-1.20417	2.54599	EIF5A;PYM1;UPF3B
fatty-acyl-CoA metabolic process (GO:0035337)	1/20	0.265461	0.601369	-1.91821	2.5441	DGAT1
RNA secondary structure unwinding (GO:0010501)	2/47	0.161577	0.601369	-1.3943	2.54151	EIF4A2;DDX50
regulation of phosphate metabolic process (GO:0019220)	1/15	0.206543	0.601369	-1.60122	2.52552	SMG6
positive regulation of cysteine-type endopeptidase activity involved in apoptotic signaling pathway (GO:2001269)	1/16	0.218692	0.601369	-1.6602	2.52366	HTRA2
peptidyl-lysine methylation (GO:0018022)	1/17	0.230655	0.601369	-1.72007	2.52305	EHMT2
leukocyte tethering or rolling (GO:0050901)	1/17	0.230655	0.601369	-1.70937	2.50736	SELPLG
glutamine family amino acid catabolic process (GO:0009065)	1/17	0.230655	0.601369	-1.70797	2.5053	ASPG
positive regulation of gene expression, epigenetic (GO:0045815)	2/48	0.166993	0.601369	-1.39859	2.50321	SLC50A1;ATAD2B
phosphorylation (GO:0016310)	9/387	0.141045	0.601369	-1.26607	2.47982	NRBP2;MAP4K2;DGKD;IRAK1;DGKA;WNK4;ULK1;BRAF;AURKA
leukocyte adhesion to vascular endothelial cell (GO:0061756)	1/17	0.230655	0.601369	-1.69027	2.47934	SELPLG
transcription from mitochondrial promoter (GO:0006390)	1/13	0.181677	0.601369	-1.45333	2.47868	POLRMT
response to nutrient levels (GO:0031667)	1/19	0.254037	0.601369	-1.80576	2.47438	ULK1
positive regulation of JUN kinase activity (GO:0043507)	2/51	0.183419	0.601369	-1.45889	2.47425	MAP4K2;MAPK8IP3
activation of NF-kappaB-inducing kinase activity (GO:0007250)	1/17	0.230655	0.601369	-1.68325	2.46905	IRAK1
regulation of glucose transport (GO:0010827)	1/17	0.230655	0.601369	-1.6772	2.46017	BRAF
positive regulation of transporter activity (GO:0032411)	1/15	0.206543	0.601369	-1.55515	2.45285	WNK4
transmembrane receptor protein serine/threonine kinase signaling pathway (GO:0007178)	4/145	0.182518	0.601369	-1.4385	2.44676	IRAK1;HFE2;PTPRK;INHA
positive regulation of response to endoplasmic reticulum stress (GO:1905898)	1/17	0.230655	0.601369	-1.66788	2.4465	BAG6
DNA methylation (GO:0006306)	1/19	0.254037	0.601369	-1.78192	2.44172	EHMT2
sensory perception (GO:0007600)	2/55	0.205655	0.601369	-1.54277	2.43998	NTSR2;KCNK4
actin filament polymerization (GO:0030041)	1/19	0.254037	0.601369	-1.78011	2.43924	WASF3
negative regulation of cell cycle process (GO:0010948)	3/82	0.130911	0.601369	-1.19554	2.43081	CDT1;EHMT2;FBXO5
activation of GTPase activity (GO:0090630)	3/85	0.141398	0.601369	-1.24016	2.42597	ARHGAP42;TBC1D10C;RUNDC1
endoplasmic reticulum calcium ion homeostasis (GO:0032469)	1/19	0.254037	0.601369	-1.766	2.41991	HERPUD1
histone H2A ubiquitination (GO:0033522)	1/18	0.242436	0.601369	-1.70108	2.41045	DDB2
cellular response to gamma radiation (GO:0071480)	1/18	0.242436	0.601369	-1.69657	2.40406	HSF1
establishment of protein localization to endoplasmic reticulum (GO:0072599)	1/16	0.218692	0.601369	-1.58109	2.4034	RAB3GAP2
positive regulation of hormone secretion (GO:0046887)	1/18	0.242436	0.601369	-1.68904	2.39339	FGA
response to calcium ion (GO:0051592)	3/80	0.124081	0.601369	-1.14567	2.3908	FGA;CPNE1;BRAF
cellular response to fatty acid (GO:0071398)	1/13	0.181677	0.601369	-1.39683	2.38232	KCNK4
regulation of interferon-alpha production (GO:0032647)	1/17	0.230655	0.601369	-1.62031	2.37672	IRF3
glial cell development (GO:0021782)	1/21	0.276711	0.60193	-1.83484	2.35737	MXRA8
protein catabolic process (GO:0030163)	3/82	0.130911	0.601369	-1.15654	2.35153	BACE1;BAG6;HTRA2
autophagosome organization (GO:1905037)	2/57	0.216882	0.601369	-1.53206	2.3416	ATG101;ULK1
positive regulation of dendrite extension (GO:1903861)	1/18	0.242436	0.601369	-1.6446	2.33043	ITSN2
negative regulation of cell migration (GO:0030336)	4/122	0.117581	0.601369	-1.08786	2.3287	NAV3;CHRD;PTPRK;VCL
mitochondrion organization (GO:0007005)	5/168	0.116036	0.601369	-1.08095	2.32822	RHOT2;POLRMT;DNM1;FANCG;GABPA
antigen processing and presentation of exogenous peptide antigen via MHC class II (GO:0019886)	3/98	0.189704	0.601369	-1.39966	2.32665	DCTN2;KIF22;IFI30
negative regulation of platelet-derived growth factor receptor signaling pathway (GO:0010642)	1/16	0.218692	0.601369	-1.53012	2.32593	HGS
regulation of protein catabolic process (GO:0042176)	3/92	0.166883	0.601369	-1.29903	2.32587	HGS;FMN2;OAZ1
polyol metabolic process (GO:0019751)	2/48	0.166993	0.601369	-1.2995	2.32585	PLCB3;IP6K2
regulation of telomere maintenance via telomere lengthening (GO:1904356)	1/18	0.242436	0.601369	-1.63926	2.32285	SMG6
regulation of neuron migration (GO:2001222)	1/20	0.265461	0.601369	-1.74646	2.31631	ARHGEF2
positive regulation of organelle assembly (GO:1902117)	2/48	0.166993	0.601369	-1.28639	2.30238	CNOT6;RAB3GAP2
mRNA transcription (GO:0009299)	1/22	0.287789	0.603151	-1.84447	2.29734	HSF1
negative regulation of striated muscle cell differentiation (GO:0051154)	1/17	0.230655	0.601369	-1.56599	2.29704	HDAC5
regulation of epithelial cell differentiation (GO:0030856)	1/19	0.254037	0.601369	-1.67181	2.29083	ARNTL
myeloid dendritic cell activation (GO:0001773)	1/15	0.206543	0.601369	-1.44588	2.28051	DOCK2
mitochondrial gene expression (GO:0140053)	2/46	0.156193	0.601369	-1.22815	2.28025	MRPL2;POLRMT
regulation of cell cycle process (GO:0010564)	3/91	0.163162	0.601369	-1.25412	2.27374	SDCCAG3;FBXO5;AURKA
G2/M transition of mitotic cell cycle (GO:0000086)	4/127	0.130723	0.601369	-1.11604	2.27077	PPP1R12A;DCTN2;PCNT;AURKA
PERK-mediated unfolded protein response (GO:0036499)	1/13	0.181677	0.601369	-1.32681	2.26291	HERPUD1
negative regulation of B cell activation (GO:0050869)	1/18	0.242436	0.601369	-1.59526	2.2605	INHA
cyclic nucleotide biosynthetic process (GO:0009190)	1/20	0.265461	0.601369	-1.70418	2.26023	AMPD2
positive regulation of cellular component biogenesis (GO:0044089)	3/88	0.152155	0.601369	-1.19858	2.25676	CDT1;HGS;SPIDR
positive regulation of interferon-alpha production (GO:0032727)	1/20	0.265461	0.601369	-1.7013	2.25641	IRF3
positive regulation of lymphocyte migration (GO:2000403)	1/18	0.242436	0.601369	-1.59134	2.25496	DOCK8
nucleobase-containing compound biosynthetic process (GO:0034654)	1/18	0.242436	0.601369	-1.59064	2.25396	AMPD2
regulation of cell cycle G2/M phase transition (GO:1902749)	3/85	0.141398	0.601369	-1.14764	2.24499	DCTN2;PCNT;AURKA
antigen processing and presentation of exogenous peptide antigen (GO:0002478)	3/98	0.189704	0.601369	-1.34278	2.23209	DCTN2;KIF22;IFI30
glucan biosynthetic process (GO:0009250)	1/19	0.254037	0.601369	-1.62746	2.23007	GBE1
aspartate family amino acid catabolic process (GO:0009068)	1/20	0.265461	0.601369	-1.67328	2.21925	ASPG
cell projection assembly (GO:0030031)	1/21	0.276711	0.60193	-1.72715	2.21901	RHOBTB3
mRNA processing (GO:0006397)	7/284	0.146637	0.601369	-1.15399	2.21543	HNRNPL;HNRNPM;SON;UPF3B;SRSF6;SRSF7;WDR33
pattern recognition receptor signaling pathway (GO:0002221)	2/49	0.17244	0.601369	-1.25946	2.21376	FGA;IRAK1
phosphatidylethanolamine biosynthetic process (GO:0006646)	1/16	0.218692	0.601369	-1.45459	2.21111	ETNK1
establishment of protein localization to organelle (GO:0072594)	2/63	0.250823	0.601369	-1.59845	2.21066	NUP214;TSC2
cytoplasmic microtubule organization (GO:0031122)	2/49	0.17244	0.601369	-1.25597	2.20763	CEP126;HOOK2
positive regulation of proteolysis (GO:0045862)	2/53	0.194496	0.601369	-1.34681	2.20519	IST1;MAPK12
regulation of oxidative stress-induced intrinsic apoptotic signaling pathway (GO:1902175)	1/19	0.254037	0.601369	-1.6016	2.19464	HTRA2
antigen processing and presentation of peptide antigen via MHC class II (GO:0002495)	3/99	0.193583	0.601369	-1.3363	2.19427	DCTN2;KIF22;IFI30
protein exit from endoplasmic reticulum (GO:0032527)	1/20	0.265461	0.601369	-1.65385	2.19348	HERPUD1
neutrophil activation involved in immune response (GO:0002283)	11/484	0.12543	0.601369	-1.05601	2.19228	GALNS;ADGRG3;TSPAN14;DPP7;DGAT1;IST1;TBC1D10C;CPNE1;DOCK2;SPTAN1;VCL
positive chemotaxis (GO:0050918)	1/18	0.242436	0.601369	-1.53766	2.17889	TSC2
cell-matrix adhesion (GO:0007160)	3/91	0.163162	0.601369	-1.19966	2.17501	FGA;PTPRK;VCL
intracellular protein transport (GO:0006886)	8/348	0.166102	0.601369	-1.19841	2.15133	NUP214;EIF5A;SEC23IP;TBC1D10C;RUNDC1;RAB3GAP2;TSC2;ARHGEF2
negative regulation of phosphate metabolic process (GO:0045936)	1/20	0.265461	0.601369	-1.62151	2.15058	INHA
osteoclast differentiation (GO:0030316)	1/20	0.265461	0.601369	-1.61836	2.14641	SBNO2
myoblast differentiation (GO:0045445)	1/17	0.230655	0.601369	-1.4575	2.1379	MAPK12
immune response-activating cell surface receptor signaling pathway (GO:0002429)	1/21	0.276711	0.60193	-1.65845	2.13075	BAG6
regulation of response to cytokine stimulus (GO:0060759)	1/21	0.276711	0.60193	-1.65753	2.12957	IRAK1
prostaglandin biosynthetic process (GO:0001516)	1/19	0.254037	0.601369	-1.55278	2.12773	PTGIS
mRNA cis splicing, via spliceosome (GO:0045292)	1/18	0.242436	0.601369	-1.50151	2.12767	PRPF39
focal adhesion assembly (GO:0048041)	1/19	0.254037	0.601369	-1.5513	2.1257	PTPRK
histone H2A acetylation (GO:0043968)	1/17	0.230655	0.601369	-1.44805	2.12404	NAA40
cytoplasmic translation (GO:0002181)	2/55	0.205655	0.601369	-1.34169	2.12196	MRPL2;RPL22
regulation of dephosphorylation (GO:0035303)	1/19	0.254037	0.601369	-1.53768	2.10705	SMG6
positive regulation of T cell migration (GO:2000406)	1/21	0.276711	0.60193	-1.63669	2.10278	DOCK8
posttranscriptional gene silencing by RNA (GO:0035194)	1/19	0.254037	0.601369	-1.53289	2.10048	CNOT6
regulation of neuron differentiation (GO:0045664)	3/85	0.141398	0.601369	-1.07218	2.09738	CPNE1;NRCAM;ARHGEF2
telomere maintenance via telomerase (GO:0007004)	1/21	0.276711	0.60193	-1.6266	2.08982	SMG6
sulfur compound transport (GO:0072348)	1/20	0.265461	0.601369	-1.57013	2.08244	SLC6A6
cell-substrate adherens junction assembly (GO:0007045)	1/19	0.254037	0.601369	-1.51877	2.08112	PTPRK
response to retinoic acid (GO:0032526)	2/58	0.222515	0.601369	-1.38304	2.07838	ASXL1;HTRA2
establishment of endothelial barrier (GO:0061028)	1/22	0.287789	0.603151	-1.65616	2.06279	TJP2
protein localization to centrosome (GO:0071539)	1/19	0.254037	0.601369	-1.5005	2.05609	DCTN2
excitatory postsynaptic potential (GO:0060079)	1/20	0.265461	0.601369	-1.54893	2.05432	NPAS4
positive regulation of exosomal secretion (GO:1903543)	1/16	0.218692	0.601369	-1.3496	2.05152	HGS
mitotic G2 DNA damage checkpoint (GO:0007095)	1/18	0.242436	0.601369	-1.44126	2.04228	FANCI
non-motile cilium assembly (GO:1905515)	1/22	0.287789	0.603151	-1.63458	2.03591	TOGARAM1
acylglycerol biosynthetic process (GO:0046463)	1/20	0.265461	0.601369	-1.53396	2.03447	DGAT1
activin receptor signaling pathway (GO:0032924)	1/20	0.265461	0.601369	-1.53189	2.03172	HFE2
histone methylation (GO:0016571)	1/20	0.265461	0.601369	-1.52789	2.02642	EHMT2
regulation of peptidase activity (GO:0052547)	1/19	0.254037	0.601369	-1.47703	2.02393	MAPK12
ribosome assembly (GO:0042255)	2/57	0.216882	0.601369	-1.32363	2.02305	RPL10;NLE1
positive regulation of mitotic cell cycle (GO:0045931)	2/53	0.194496	0.601369	-1.23388	2.02028	HSF1;AURKA
negative regulation of double-strand break repair (GO:2000780)	1/20	0.265461	0.601369	-1.51906	2.01471	HSF1
cellular response to nutrient levels (GO:0031669)	2/55	0.205655	0.601369	-1.27138	2.01075	EHMT2;ULK1
regulation of endoplasmic reticulum stress-induced intrinsic apoptotic signaling pathway (GO:1902235)	1/21	0.276711	0.60193	-1.56054	2.00496	HERPUD1
nucleotide-excision repair, preincision complex stabilization (GO:0006293)	1/22	0.287789	0.603151	-1.60532	1.99947	DDB2
hydrogen peroxide metabolic process (GO:0042743)	1/21	0.276711	0.60193	-1.55584	1.99892	PXDN
vesicle-mediated transport between endosomal compartments (GO:0098927)	1/24	0.30944	0.608696	-1.70395	1.99872	HOOK2
mitotic recombination (GO:0006312)	1/19	0.254037	0.601369	-1.45017	1.98714	SMC5
cellular response to unfolded protein (GO:0034620)	1/23	0.298698	0.604302	-1.64345	1.98582	HSF1
positive regulation of cell-substrate adhesion (GO:0010811)	2/53	0.194496	0.601369	-1.21163	1.98385	FGA;UTRN
meiosis I (GO:0007127)	1/22	0.287789	0.603151	-1.58848	1.97849	SYCP3
cellular response to alkaloid (GO:0071312)	1/22	0.287789	0.603151	-1.58804	1.97794	SPIDR
mitochondrial fission (GO:0000266)	1/22	0.287789	0.603151	-1.58532	1.97456	DNM1
regulation of myotube differentiation (GO:0010830)	1/20	0.265461	0.601369	-1.48661	1.97167	HDAC5
photoperiodism (GO:0009648)	1/22	0.287789	0.603151	-1.5828	1.97142	PPP1CC
cellular protein localization (GO:0034613)	8/328	0.131948	0.601369	-0.973	1.97066	SEC23IP;HGS;TBC1D10C;RUNDC1;RAB3GAP2;ARHGEF2;PTPRK;VCL
phosphatidylethanolamine metabolic process (GO:0046337)	1/21	0.276711	0.60193	-1.53069	1.9666	ETNK1
nuclear transport (GO:0051169)	1/23	0.298698	0.604302	-1.62703	1.96598	EIF5A
negative regulation of protein tyrosine kinase activity (GO:0061099)	1/22	0.287789	0.603151	-1.57496	1.96166	ZGPAT
small GTPase mediated signal transduction (GO:0007264)	3/100	0.197482	0.601369	-1.20402	1.95306	USP28;RUNDC3A;RGL2
folic acid-containing compound metabolic process (GO:0006760)	1/24	0.30944	0.608696	-1.66037	1.9476	FTCD
entrainment of circadian clock by photoperiod (GO:0043153)	1/21	0.276711	0.60193	-1.51451	1.94581	PPP1CC
regulation of nuclear division (GO:0051783)	1/22	0.287789	0.603151	-1.55783	1.94032	FBXO5
energy reserve metabolic process (GO:0006112)	1/22	0.287789	0.603151	-1.55759	1.94002	GBE1
negative regulation of cytokine biosynthetic process (GO:0042036)	1/22	0.287789	0.603151	-1.5523	1.93343	INHA
translation (GO:0006412)	6/233	0.148415	0.601369	-1.01205	1.93073	HBS1L;MRPL2;RPL10;RPL22;RRBP1;TARS2
early endosome to late endosome transport (GO:0045022)	1/23	0.298698	0.604302	-1.5963	1.92884	HOOK2
B cell differentiation (GO:0030183)	2/53	0.194496	0.601369	-1.178	1.92879	ADGRG3;HDAC5
cilium-dependent cell motility (GO:0060285)	1/25	0.320018	0.608696	-1.69023	1.9258	CCDC65
regulation of vascular endothelial growth factor receptor signaling pathway (GO:0030947)	1/23	0.298698	0.604302	-1.59313	1.92501	HGS
positive regulation of cellular amide metabolic process (GO:0034250)	2/62	0.245148	0.601369	-1.36374	1.91728	PYM1;UPF3B
regulation of necroptotic process (GO:0060544)	1/17	0.230655	0.601369	-1.30214	1.91001	ARHGEF2
axon extension (GO:0048675)	1/21	0.276711	0.60193	-1.48621	1.90945	ULK1
regulation of apoptotic process (GO:0042981)	16/816	0.186868	0.601369	-1.12621	1.88905	MAP4K2;RBM25;PTGIS;RPL10;PLEKHG5;HTRA2;BRAF;FMN2;FGD2;SON;IRAK1;MT-RNR2;ARHGEF1;ARHGEF2;INHA;IP6K2
response to interferon-beta (GO:0035456)	1/20	0.265461	0.601369	-1.41853	1.88138	HTRA2
regulation of dendrite extension (GO:1903859)	1/19	0.254037	0.601369	-1.37258	1.88081	ITSN2
regulation of interleukin-2 production (GO:0032663)	1/22	0.287789	0.603151	-1.50856	1.87896	NAV3
negative regulation of cellular response to growth factor stimulus (GO:0090288)	2/56	0.211261	0.601369	-1.20428	1.87224	HGS;CHRD
protein deubiquitination (GO:0016579)	6/258	0.204367	0.601369	-1.17597	1.86724	ASXL1;RNF123;HGS;JOSD2;USP28;DDB2
positive regulation of intracellular protein transport (GO:0090316)	4/153	0.207427	0.601369	-1.18522	1.86433	ZBTB17;HTRA2;PCNT;OAZ1
positive regulation of apoptotic process (GO:0043065)	7/308	0.19433	0.601369	-1.13575	1.86058	PTGIS;PLEKHG5;HTRA2;ARHGEF1;ARHGEF2;IP6K2;FGD2
protein import (GO:0017038)	2/57	0.216882	0.601369	-1.20927	1.84825	NUP214;TSC2
nucleotide-excision repair, DNA duplex unwinding (GO:0000717)	1/23	0.298698	0.604302	-1.51566	1.8314	DDB2
hepaticobiliary system development (GO:0061008)	1/22	0.287789	0.603151	-1.47012	1.83107	ARID5B
protein targeting to lysosome (GO:0006622)	1/20	0.265461	0.601369	-1.37979	1.82999	HGS
ncRNA 3'-end processing (GO:0043628)	1/26	0.330435	0.608696	-1.65229	1.82966	ELAC2
homologous chromosome segregation (GO:0045143)	1/19	0.254037	0.601369	-1.33239	1.82574	FMN2
cellular response to misfolded protein (GO:0071218)	1/22	0.287789	0.603151	-1.46449	1.82407	BAG6
RNA splicing, via transesterification reactions with bulged adenosine as nucleophile (GO:0000377)	6/237	0.156856	0.601369	-0.981915	1.81892	HNRNPL;HNRNPM;UPF3B;SRSF6;SRSF7;WDR33
negative regulation of nucleic acid-templated transcription (GO:1903507)	10/445	0.146622	0.601369	-0.946633	1.81744	EIF4A2;HDAC5;SBNO2;ZGPAT;HDAC10;TIMELESS;ZC3H8;ARID5B;PTPRK;ARNTL
triglyceride biosynthetic process (GO:0019432)	1/20	0.265461	0.601369	-1.36884	1.81547	DGAT1
positive regulation of type I interferon production (GO:0032481)	2/63	0.250823	0.601369	-1.30912	1.81052	IRF3;IRAK1
purine-containing compound biosynthetic process (GO:0072522)	1/23	0.298698	0.604302	-1.48803	1.79802	AMPD2
cellular protein modification process (GO:0006464)	19/1002	0.197822	0.601369	-1.10138	1.78467	FGA;MAP4K2;PPP1R12A;GPS1;WNK4;PTPRM;BRAF;WDYHV1;PTPRK;DDB2;AURKA;PPP1CC;PPM1A;NRBP2;IRAK1;ARSK;MXRA8;UBXN7;ULK1
positive regulation of blood circulation (GO:1903524)	1/24	0.30944	0.608696	-1.51735	1.77984	FGA
synapsis (GO:0007129)	1/21	0.276711	0.60193	-1.38298	1.77682	BAG6
regulation of heterotypic cell-cell adhesion (GO:0034114)	1/20	0.265461	0.601369	-1.3376	1.77404	FGA
autophagosome assembly (GO:0000045)	2/59	0.22816	0.601369	-1.19838	1.77085	ATG101;ULK1
negative regulation of response to endoplasmic reticulum stress (GO:1903573)	1/23	0.298698	0.604302	-1.46208	1.76666	HERPUD1
RNA-dependent DNA biosynthetic process (GO:0006278)	1/22	0.287789	0.603151	-1.41758	1.76563	SMG6
protein processing (GO:0016485)	3/102	0.205336	0.601369	-1.10517	1.74961	HTRA2;HFE2;RHBDL3
histone mRNA metabolic process (GO:0008334)	1/25	0.320018	0.608696	-1.53064	1.74397	MTPAP
negative regulation of actin filament polymerization (GO:0030837)	1/23	0.298698	0.604302	-1.43681	1.73612	KANK3
regulation of Wnt signaling pathway (GO:0030111)	3/110	0.237401	0.601369	-1.20593	1.73413	PPM1A;TSC2;SENP2
negative regulation of sprouting angiogenesis (GO:1903671)	1/23	0.298698	0.604302	-1.43408	1.73283	HDAC5
negative regulation of ion transport (GO:0043271)	1/21	0.276711	0.60193	-1.34317	1.72568	WNK4
regulation of transcription from RNA polymerase III promoter (GO:0006359)	1/23	0.298698	0.604302	-1.42782	1.72527	ZC3H8
histone lysine methylation (GO:0034968)	1/23	0.298698	0.604302	-1.42348	1.72002	EHMT2
negative regulation of cell cycle G1/S phase transition (GO:1902807)	1/23	0.298698	0.604302	-1.41785	1.71322	RBL1
sensory perception of pain (GO:0019233)	1/25	0.320018	0.608696	-1.50013	1.70921	KCNK4
chaperone mediated protein folding requiring cofactor (GO:0051085)	1/25	0.320018	0.608696	-1.49743	1.70613	DNAJB14
organonitrogen compound catabolic process (GO:1901565)	2/57	0.216882	0.601369	-1.11127	1.69847	BACE1;ERAP1
regulation of DNA biosynthetic process (GO:2000278)	1/23	0.298698	0.604302	-1.40363	1.69603	SMG6
nucleotide-excision repair, DNA incision, 3'-to lesion (GO:0006295)	1/23	0.298698	0.604302	-1.40327	1.6956	DDB2
neurotrophin signaling pathway (GO:0038179)	1/18	0.242436	0.601369	-1.18868	1.68438	KIDINS220
negative regulation of protein polymerization (GO:0032272)	1/23	0.298698	0.604302	-1.39354	1.68384	KANK3
intrinsic apoptotic signaling pathway in response to endoplasmic reticulum stress (GO:0070059)	1/25	0.320018	0.608696	-1.47223	1.67742	BAG6
regulation of cellular catabolic process (GO:0031329)	2/56	0.211261	0.601369	-1.06851	1.66117	ULK1;WDR24
regulation of DNA binding (GO:0051101)	2/53	0.194496	0.601369	-1.01325	1.65904	CDT1;CPNE1
cellular response to catecholamine stimulus (GO:0071870)	1/24	0.30944	0.608696	-1.41253	1.65689	GABPA
negative regulation of oxidative stress-induced cell death (GO:1903202)	1/25	0.320018	0.608696	-1.44674	1.64839	HTRA2
regulation of lipid metabolic process (GO:0019216)	3/101	0.2014	0.601369	-1.02175	1.63732	RBL1;TXNRD1;SULT2A1
response to UV (GO:0009411)	3/99	0.193583	0.601369	-0.992883	1.63036	PTPRK;USP28;DDB2
negative regulation of endothelial cell apoptotic process (GO:2000352)	1/25	0.320018	0.608696	-1.42993	1.62923	FGA
cellular response to ammonium ion (GO:0071242)	1/24	0.30944	0.608696	-1.38721	1.62718	GABPA
peptide catabolic process (GO:0043171)	1/26	0.330435	0.608696	-1.46728	1.62478	ERAP1
regulation of telomere capping (GO:1904353)	1/24	0.30944	0.608696	-1.38334	1.62265	SMG6
regulation of epidermal growth factor-activated receptor activity (GO:0007176)	1/25	0.320018	0.608696	-1.41827	1.61594	ZGPAT
regulation of vesicle fusion (GO:0031338)	2/62	0.245148	0.601369	-1.14617	1.6114	TBC1D10C;RUNDC1
regulation of cell division (GO:0051302)	2/66	0.267863	0.60193	-1.22075	1.60807	SDCCAG3;AURKA
histone modification (GO:0016570)	3/99	0.193583	0.601369	-0.977227	1.60466	HDAC5;HDAC10;EHMT2
glycogen biosynthetic process (GO:0005978)	1/19	0.254037	0.601369	-1.16817	1.60072	GBE1
long-chain fatty-acyl-CoA metabolic process (GO:0035336)	1/26	0.330435	0.608696	-1.44335	1.59829	DGAT1
regulation of ion homeostasis (GO:2000021)	1/24	0.30944	0.608696	-1.36103	1.59647	WNK4
viral gene expression (GO:0019080)	3/111	0.24147	0.601369	-1.12041	1.59211	NUP214;RPL10;RPL22
positive regulation of glucose transport (GO:0010828)	1/26	0.330435	0.608696	-1.43649	1.59068	BRAF
viral transcription (GO:0019083)	3/114	0.253747	0.601369	-1.1574	1.58727	NUP214;RPL10;RPL22
cellular response to metal ion (GO:0071248)	3/101	0.2014	0.601369	-0.989192	1.58514	HSF1;CPNE1;BRAF
negative regulation of insulin receptor signaling pathway (GO:0046627)	1/26	0.330435	0.608696	-1.42714	1.58033	TSC2
lamellipodium assembly (GO:0030032)	1/24	0.30944	0.608696	-1.34238	1.5746	VCL
cell chemotaxis (GO:0060326)	2/61	0.239478	0.601369	-1.10165	1.57458	DOCK4;PLEKHG5
negative regulation of transcription factor import into nucleus (GO:0042992)	1/24	0.30944	0.608696	-1.33892	1.57054	PPM1A
respiratory tube development (GO:0030323)	1/26	0.330435	0.608696	-1.41489	1.56677	BAG6
positive regulation of interferon-beta production (GO:0032728)	1/27	0.340693	0.61404	-1.45356	1.56516	IRF3
positive regulation of ion transmembrane transporter activity (GO:0032414)	1/24	0.30944	0.608696	-1.32904	1.55896	WNK4
inorganic cation import across plasma membrane (GO:0098659)	1/26	0.330435	0.608696	-1.4054	1.55626	SLC9A5
histone monoubiquitination (GO:0010390)	1/25	0.320018	0.608696	-1.36234	1.55222	DDB2
cellular senescence (GO:0090398)	1/25	0.320018	0.608696	-1.34699	1.53473	SMC5
negative regulation of oxidative stress-induced intrinsic apoptotic signaling pathway (GO:1902176)	1/19	0.254037	0.601369	-1.11892	1.53323	HTRA2
fat cell differentiation (GO:0045444)	2/56	0.211261	0.601369	-0.985192	1.53164	ERAP1;SENP2
mitotic G2/M transition checkpoint (GO:0044818)	1/24	0.30944	0.608696	-1.3029	1.52829	FANCI
iron ion homeostasis (GO:0055072)	2/64	0.256501	0.601369	-1.12229	1.52702	MT-RNR2;HFE2
transition metal ion homeostasis (GO:0055076)	1/25	0.320018	0.608696	-1.3375	1.52392	HFE2
internal peptidyl-lysine acetylation (GO:0018393)	1/27	0.340693	0.61404	-1.41061	1.51891	BAG6
negative regulation of G1/S transition of mitotic cell cycle (GO:2000134)	1/25	0.320018	0.608696	-1.32824	1.51337	RBL1
nucleotide-excision repair (GO:0006289)	3/109	0.233343	0.601369	-1.03914	1.51221	GPS1;MMS19;DDB2
regulation of NF-kappaB import into nucleus (GO:0042345)	1/27	0.340693	0.61404	-1.40268	1.51037	PPM1A
cellular response to nerve growth factor stimulus (GO:1990090)	1/23	0.298698	0.604302	-1.24087	1.49937	KIDINS220
negative regulation of hydrolase activity (GO:0051346)	3/109	0.233343	0.601369	-1.02893	1.49735	PPP1R12A;LRCH1;GMIP
negative regulation of cytoskeleton organization (GO:0051494)	1/25	0.320018	0.608696	-1.31105	1.49377	KANK3
lamellipodium organization (GO:0097581)	1/26	0.330435	0.608696	-1.33571	1.4791	VCL
synapse assembly (GO:0007416)	2/64	0.256501	0.601369	-1.08616	1.47786	NPAS4;NRCAM
negative regulation of cellular response to insulin stimulus (GO:1900077)	1/27	0.340693	0.61404	-1.36904	1.47414	TSC2
spermatogenesis (GO:0007283)	4/154	0.210609	0.601369	-0.946108	1.4738	BAG6;HERC4;ARNTL;WDR33
cellular amide metabolic process (GO:0043603)	2/63	0.250823	0.601369	-1.06529	1.4733	NLN;FTCD
peptide metabolic process (GO:0006518)	3/105	0.217247	0.601369	-0.9626	1.46962	BACE1;NLN;ERAP1
negative regulation of cellular protein localization (GO:1903828)	1/26	0.330435	0.608696	-1.3213	1.46313	CDT1
response to copper ion (GO:0046688)	1/26	0.330435	0.608696	-1.31962	1.46128	HSF1
regulation of I-kappaB kinase/NF-kappaB signaling (GO:0043122)	5/205	0.206197	0.601369	-0.922786	1.45701	PPM1A;IRAK1;PLEKHG5;CPNE1;MIB2
positive regulation of programmed cell death (GO:0043068)	6/258	0.204367	0.601369	-0.917006	1.45606	PLEKHG5;HTRA2;ARHGEF1;ARHGEF2;IP6K2;FGD2
ribosomal large subunit biogenesis (GO:0042273)	2/64	0.256501	0.601369	-1.06451	1.44839	RPL10;NLE1
cellular response to copper ion (GO:0071280)	1/22	0.287789	0.603151	-1.1604	1.44532	HSF1
positive regulation of nuclear division (GO:0051785)	1/26	0.330435	0.608696	-1.3045	1.44454	AURKA
prostaglandin metabolic process (GO:0006693)	1/26	0.330435	0.608696	-1.29913	1.43858	PTGIS
regulation of cellular protein localization (GO:1903827)	1/26	0.330435	0.608696	-1.29156	1.43021	SPIDR
NAD biosynthetic process (GO:0009435)	1/23	0.298698	0.604302	-1.1831	1.42956	PTGIS
negative regulation of gene expression, epigenetic (GO:0045814)	1/26	0.330435	0.608696	-1.2869	1.42505	AEBP2
cellular response to light stimulus (GO:0071482)	2/67	0.273544	0.60193	-1.0989	1.4245	PTPRK;USP28
female gamete generation (GO:0007292)	1/26	0.330435	0.608696	-1.28513	1.42308	FMN2
viral process (GO:0016032)	5/221	0.250799	0.601369	-1.02403	1.41635	NUP214;RPL10;IST1;RPL22;DOCK2
organelle fission (GO:0048285)	1/29	0.360741	0.621257	-1.38791	1.41511	DNM1
misfolded or incompletely synthesized protein catabolic process (GO:0006515)	1/26	0.330435	0.608696	-1.27653	1.41356	BAG6
regulation of keratinocyte differentiation (GO:0045616)	1/30	0.370536	0.621257	-1.42247	1.41223	SRSF6
regulation of microtubule cytoskeleton organization (GO:0070507)	1/24	0.30944	0.608696	-1.20311	1.41124	AURKA
negative regulation of interferon-gamma production (GO:0032689)	1/21	0.276711	0.60193	-1.09774	1.41035	INHA
response to gamma radiation (GO:0010332)	1/27	0.340693	0.61404	-1.30955	1.41008	HSF1
transcription from RNA polymerase III promoter (GO:0006383)	1/28	0.350794	0.621257	-1.34505	1.40902	ZC3H8
regulation of centrosome cycle (GO:0046605)	1/27	0.340693	0.61404	-1.3033	1.40336	AURKA
muscle organ development (GO:0007517)	2/61	0.239478	0.601369	-0.979307	1.39972	UTRN;MAPK12
monocarboxylic acid catabolic process (GO:0072329)	1/26	0.330435	0.608696	-1.25813	1.39318	ASPG
regulation of extrinsic apoptotic signaling pathway in absence of ligand (GO:2001239)	1/28	0.350794	0.621257	-1.31153	1.3739	HTRA2
regulation of developmental growth (GO:0048638)	1/31	0.380181	0.625444	-1.4154	1.36885	NRCAM
cytoskeleton-dependent intracellular transport (GO:0030705)	1/27	0.340693	0.61404	-1.26517	1.3623	HOOK2
positive regulation of substrate adhesion-dependent cell spreading (GO:1900026)	1/28	0.350794	0.621257	-1.29329	1.3548	FGA
regulation of translation (GO:0006417)	5/214	0.230969	0.601369	-0.91959	1.34763	NUP214;EIF4A2;RPL10;PYM1;UPF3B
peptidyl-tyrosine dephosphorylation (GO:0035335)	1/26	0.330435	0.608696	-1.21315	1.34338	PTPRF
positive regulation of transcription from RNA polymerase II promoter in response to stress (GO:0036003)	1/30	0.370536	0.621257	-1.34848	1.33878	HSF1
negative regulation of epithelial cell apoptotic process (GO:1904036)	1/30	0.370536	0.621257	-1.34453	1.33486	FGA
DNA damage response, signal transduction by p53 class mediator resulting in cell cycle arrest (GO:0006977)	2/63	0.250823	0.601369	-0.955557	1.32154	CNOT6;AURKA
cyclic purine nucleotide metabolic process (GO:0052652)	1/31	0.380181	0.625444	-1.35855	1.31387	AMPD2
negative regulation of osteoblast differentiation (GO:0045668)	1/28	0.350794	0.621257	-1.25202	1.31156	CHRD
negative regulation of epithelial cell proliferation (GO:0050680)	2/67	0.273544	0.60193	-1.00891	1.30784	PTPRM;PTPRK
telomere maintenance via telomere lengthening (GO:0010833)	1/28	0.350794	0.621257	-1.24845	1.30782	SMG6
regulation of protein binding (GO:0043393)	3/112	0.245552	0.601369	-0.926385	1.30087	HDAC5;HSF1;AURKA
cytosolic transport (GO:0016482)	3/119	0.274392	0.60193	-1.00498	1.29964	HOOK2;TBC1D10C;RHOBTB3
MyD88-independent toll-like receptor signaling pathway (GO:0002756)	1/31	0.380181	0.625444	-1.34201	1.29787	IRF3
male gamete generation (GO:0048232)	4/155	0.213804	0.601369	-0.841239	1.29778	BAG6;HERC4;ARNTL;WDR33
regulation of proteolysis (GO:0030162)	2/64	0.256501	0.601369	-0.95117	1.29418	BAG6;IST1
positive regulation of protein modification by small protein conjugation or removal (GO:1903322)	2/66	0.267863	0.60193	-0.981268	1.2926	FANCI;SENP2
cytoplasmic pattern recognition receptor signaling pathway (GO:0002753)	1/25	0.320018	0.608696	-1.13434	1.29244	IRAK1
cellular protein catabolic process (GO:0044257)	2/63	0.250823	0.601369	-0.932601	1.2898	RNF123;HTRA2
lytic vacuole organization (GO:0080171)	1/29	0.360741	0.621257	-1.26477	1.28955	HOOK2
negative regulation of endothelial cell proliferation (GO:0001937)	1/31	0.380181	0.625444	-1.33158	1.28779	PTPRM
nucleotide-binding domain, leucine rich repeat containing receptor signaling pathway (GO:0035872)	1/26	0.330435	0.608696	-1.16257	1.28737	IRAK1
negative regulation of Notch signaling pathway (GO:0045746)	1/30	0.370536	0.621257	-1.29279	1.28349	ARRDC1
negative regulation of myeloid leukocyte differentiation (GO:0002762)	1/28	0.350794	0.621257	-1.22312	1.28129	INHA
cellular response to ketone (GO:1901655)	1/29	0.360741	0.621257	-1.25315	1.2777	NDOR1
nucleobase-containing small molecule interconversion (GO:0015949)	1/32	0.389679	0.630187	-1.34851	1.27088	TXNRD1
cellular response to interferon-gamma (GO:0071346)	3/117	0.26611	0.601864	-0.955322	1.2647	IRF3;IFI30;IRF9
tube closure (GO:0060606)	1/30	0.370536	0.621257	-1.26906	1.25993	TSC2
regulation of chromosome segregation (GO:0051983)	1/30	0.370536	0.621257	-1.2653	1.2562	SMC5
cellular response to reactive oxygen species (GO:0034614)	2/66	0.267863	0.60193	-0.950911	1.25261	ROMO1;PTPRK
cellular response to topologically incorrect protein (GO:0035967)	1/28	0.350794	0.621257	-1.19016	1.24676	HSF1
macroautophagy (GO:0016236)	3/111	0.24147	0.601369	-0.87705	1.24629	HGS;ATG101;ULK1
nucleotide-excision repair, preincision complex assembly (GO:0006294)	1/30	0.370536	0.621257	-1.25045	1.24145	DDB2
positive regulation of protein polymerization (GO:0032273)	2/65	0.262182	0.601369	-0.926334	1.2401	NAV3;TOGARAM1
RNA phosphodiester bond hydrolysis (GO:0090501)	1/29	0.360741	0.621257	-1.21445	1.23825	WDR33
protein sumoylation (GO:0016925)	2/69	0.284899	0.603151	-0.984172	1.23575	NUP214;SENP2
peptide biosynthetic process (GO:0043043)	4/175	0.280069	0.603151	-0.970361	1.235	HBS1L;RPL10;RPL22;RRBP1
cholesterol metabolic process (GO:0008203)	2/69	0.284899	0.603151	-0.97493	1.22414	GGPS1;HSD17B7
cortical cytoskeleton organization (GO:0030865)	1/30	0.370536	0.621257	-1.2246	1.21579	RHOBTB3
positive regulation of cell projection organization (GO:0031346)	2/64	0.256501	0.601369	-0.893015	1.21506	NAV3;KIDINS220
TRIF-dependent toll-like receptor signaling pathway (GO:0035666)	1/30	0.370536	0.621257	-1.21255	1.20383	IRF3
negative regulation of catalytic activity (GO:0043086)	1/27	0.340693	0.61404	-1.11653	1.20225	PPP1R12A
oxoacid metabolic process (GO:0043436)	1/33	0.399032	0.632233	-1.29845	1.1929	SULT2A1
cellular amino acid biosynthetic process (GO:0008652)	1/29	0.360741	0.621257	-1.16456	1.18738	ASPG
negative regulation of proteasomal ubiquitin-dependent protein catabolic process (GO:0032435)	1/25	0.320018	0.608696	-1.04016	1.18513	BAG6
nuclear import (GO:0051170)	2/72	0.301895	0.608696	-0.986195	1.18114	NUP214;TSC2
positive regulation of proteasomal ubiquitin-dependent protein catabolic process (GO:0032436)	2/71	0.296236	0.604302	-0.963654	1.17238	RNF180;HERPUD1
positive regulation of I-kappaB kinase/NF-kappaB signaling (GO:0043123)	4/164	0.243123	0.601369	-0.828612	1.17181	PPM1A;IRAK1;PLEKHG5;MIB2
negative regulation of angiogenesis (GO:0016525)	2/70	0.29057	0.604302	-0.94469	1.16755	HGS;PTPRM
cellular response to decreased oxygen levels (GO:0036294)	2/65	0.262182	0.601369	-0.865864	1.15915	PTGIS;FMN2
negative regulation of BMP signaling pathway (GO:0030514)	1/33	0.399032	0.632233	-1.26102	1.15852	CHRD
regulation of alcohol biosynthetic process (GO:1902930)	1/35	0.417311	0.634153	-1.32528	1.15819	GGPS1
regulation of T cell receptor signaling pathway (GO:0050856)	1/27	0.340693	0.61404	-1.07243	1.15477	TESPA1
lysosome organization (GO:0007040)	1/32	0.389679	0.630187	-1.22472	1.15421	HOOK2
protein localization to lysosome (GO:0061462)	1/31	0.380181	0.625444	-1.19194	1.15273	HGS
coenzyme biosynthetic process (GO:0009108)	1/30	0.370536	0.621257	-1.15808	1.14975	PPCDC
protein autophosphorylation (GO:0046777)	4/176	0.283474	0.603151	-0.911826	1.14948	SMG1;IRAK1;ULK1;AURKA
negative regulation of intracellular steroid hormone receptor signaling pathway (GO:0033144)	1/29	0.360741	0.621257	-1.12367	1.14569	ARNTL
regulation of vasoconstriction (GO:0019229)	1/30	0.370536	0.621257	-1.15379	1.14549	FGA
positive regulation of extrinsic apoptotic signaling pathway (GO:2001238)	1/29	0.360741	0.621257	-1.12315	1.14516	HTRA2
negative regulation of blood vessel morphogenesis (GO:2000181)	2/66	0.267863	0.60193	-0.868344	1.14385	HGS;PTPRM
regulation of peptide hormone secretion (GO:0090276)	2/74	0.313188	0.608696	-0.981759	1.13977	FGA;ARNTL
amino acid transmembrane transport (GO:0003333)	1/30	0.370536	0.621257	-1.14737	1.13911	SLC6A6
response to growth factor (GO:0070848)	1/27	0.340693	0.61404	-1.05655	1.13766	HTRA2
purine ribonucleoside monophosphate biosynthetic process (GO:0009168)	1/40	0.460621	0.653363	-1.4671	1.13727	AMPD2
regulation of mitotic cell cycle (GO:0007346)	4/166	0.249761	0.601369	-0.819675	1.13709	MAP4K2;RBL1;HSF1;FBXO5
Ras protein signal transduction (GO:0007265)	5/224	0.259427	0.601369	-0.842562	1.13685	RHOT2;RHOBTB3;ARHGEF1;USP28;RGL2
cellular response to cadmium ion (GO:0071276)	1/30	0.370536	0.621257	-1.14082	1.13262	HSF1
neural tube closure (GO:0001843)	1/34	0.408242	0.632233	-1.26315	1.13165	TSC2
'de novo' posttranslational protein folding (GO:0051084)	1/31	0.380181	0.625444	-1.16866	1.13022	DNAJB14
regulation of cell migration involved in sprouting angiogenesis (GO:0090049)	1/31	0.380181	0.625444	-1.16396	1.12567	HDAC5
positive regulation of T cell differentiation (GO:0045582)	1/33	0.399032	0.632233	-1.22258	1.1232	TESPA1
primary neural tube formation (GO:0014020)	1/29	0.360741	0.621257	-1.09886	1.12039	TSC2
vesicle-mediated transport to the plasma membrane (GO:0098876)	1/32	0.389679	0.630187	-1.18741	1.11906	SDCCAG3
microtubule bundle formation (GO:0001578)	1/33	0.399032	0.632233	-1.21245	1.11389	TOGARAM1
cellular response to alcohol (GO:0097306)	1/29	0.360741	0.621257	-1.09097	1.11235	SPIDR
positive regulation of Notch signaling pathway (GO:0045747)	1/34	0.408242	0.632233	-1.23522	1.10663	TSPAN14
signal transduction involved in mitotic G1 DNA damage checkpoint (GO:0072431)	2/64	0.256501	0.601369	-0.812442	1.10543	CNOT6;AURKA
protein targeting to vacuole (GO:0006623)	1/28	0.350794	0.621257	-1.05314	1.10322	HGS
positive regulation of tumor necrosis factor superfamily cytokine production (GO:1903557)	1/33	0.399032	0.632233	-1.19997	1.10243	ARHGEF2
3'-phosphoadenosine 5'-phosphosulfate metabolic process (GO:0050427)	1/26	0.330435	0.608696	-0.995265	1.1021	SULT2A1
B cell activation (GO:0042113)	2/74	0.313188	0.608696	-0.947654	1.10018	ADGRG3;HDAC5
negative regulation of receptor activity (GO:2000272)	1/33	0.399032	0.632233	-1.19238	1.09546	ZGPAT
regulation of Notch signaling pathway (GO:0008593)	2/71	0.296236	0.604302	-0.900042	1.09499	TSPAN14;ARRDC1
regulation of nervous system development (GO:0051960)	1/26	0.330435	0.608696	-0.986506	1.0924	ARNTL
G2 DNA damage checkpoint (GO:0031572)	1/33	0.399032	0.632233	-1.18654	1.09009	FANCI
organelle transport along microtubule (GO:0072384)	1/32	0.389679	0.630187	-1.15457	1.08811	RHOT2
lung development (GO:0030324)	1/30	0.370536	0.621257	-1.09124	1.08339	BAG6
response to cadmium ion (GO:0046686)	1/32	0.389679	0.630187	-1.14493	1.07902	HSF1
hippo signaling (GO:0035329)	1/31	0.380181	0.625444	-1.11506	1.07839	TJP2
lymphocyte differentiation (GO:0030098)	2/74	0.313188	0.608696	-0.923285	1.07189	ADGRG3;HDAC5
negative regulation of endothelial cell migration (GO:0010596)	1/35	0.417311	0.634153	-1.22196	1.0679	PTPRM
negative regulation of transferase activity (GO:0051348)	1/31	0.380181	0.625444	-1.10342	1.06713	EIF4A2
DNA replication (GO:0006260)	3/121	0.2827	0.603151	-0.842281	1.06411	RNASEH2A;TIMELESS;NAP1L1
negative regulation of proteasomal protein catabolic process (GO:1901799)	1/29	0.360741	0.621257	-1.03988	1.06026	BAG6
connective tissue development (GO:0061448)	1/31	0.380181	0.625444	-1.09011	1.05425	ARID5B
positive regulation of proteasomal protein catabolic process (GO:1901800)	2/74	0.313188	0.608696	-0.907536	1.0536	BAG6;RNF180
regulation of wound healing (GO:0061041)	1/35	0.417311	0.634153	-1.20028	1.04895	SRSF6
fibroblast growth factor receptor signaling pathway (GO:0008543)	2/79	0.341231	0.61404	-0.974645	1.04793	TIAL1;HNRNPM
plasma membrane bounded cell projection assembly (GO:0120031)	5/242	0.31246	0.608696	-0.899833	1.04676	CEP126;CCDC65;PCNT;VCL;FGD2
mitotic cell cycle phase transition (GO:0044772)	5/222	0.253667	0.601369	-0.757198	1.03867	CDT1;PPP1R12A;DCTN2;PCNT;AURKA
maturation of SSU-rRNA from tricistronic rRNA transcript (SSU-rRNA, 5.8S rRNA, LSU-rRNA) (GO:0000462)	1/36	0.426242	0.634153	-1.21406	1.03529	TSR1
negative regulation of gene expression (GO:0010629)	12/619	0.241019	0.601369	-0.726561	1.03381	HDAC5;SBNO2;RBL1;ZGPAT;AEBP2;HDAC10;CPNE1;TIMELESS;ZC3H8;ARID5B;PTPRK;ARNTL
regulation of mitotic cell cycle phase transition (GO:1901990)	4/185	0.314363	0.608696	-0.891729	1.03191	DCTN2;FBXO5;PCNT;AURKA
regulation of DNA recombination (GO:0000018)	1/34	0.408242	0.632233	-1.14983	1.03013	SPIDR
positive regulation of TOR signaling (GO:0032008)	1/33	0.399032	0.632233	-1.11979	1.02877	WDR24
endosomal transport (GO:0016197)	5/230	0.276888	0.60193	-0.801023	1.02863	SDCCAG3;HOOK2;HGS;TBC1D10C;RHOBTB3
lysosomal transport (GO:0007041)	2/73	0.307546	0.608696	-0.863227	1.01786	HOOK2;HGS
tRNA-containing ribonucleoprotein complex export from nucleus (GO:0071431)	1/34	0.408242	0.632233	-1.13367	1.01565	NUP214
axonemal dynein complex assembly (GO:0070286)	1/34	0.408242	0.632233	-1.12939	1.01181	CCDC65
actin filament organization (GO:0007015)	3/121	0.2827	0.603151	-0.799336	1.00985	SPTA1;RHOBTB3;ARHGEF2
regulation of autophagosome assembly (GO:2000785)	1/34	0.408242	0.632233	-1.12656	1.00928	RAB3GAP2
negative regulation of protein binding (GO:0032091)	2/68	0.279223	0.603151	-0.791052	1.00918	PTPRF;AURKA
positive regulation of cytokine-mediated signaling pathway (GO:0001961)	1/34	0.408242	0.632233	-1.12608	1.00885	CPNE1
nucleotide-binding oligomerization domain containing signaling pathway (GO:0070423)	1/29	0.360741	0.621257	-0.989116	1.0085	IRAK1
tRNA export from nucleus (GO:0006409)	1/34	0.408242	0.632233	-1.12401	1.007	NUP214
nucleic acid-templated transcription (GO:0097659)	2/77	0.330052	0.608696	-0.897983	0.99542	MMS19;PTMA
regulation of cytokinesis (GO:0032465)	2/78	0.335648	0.61404	-0.909772	0.993191	SDCCAG3;AURKA
respiratory system development (GO:0060541)	1/30	0.370536	0.621257	-0.998026	0.990847	BAG6
negative regulation of mitotic cell cycle phase transition (GO:1901991)	2/80	0.346799	0.621257	-0.931973	0.986969	RBL1;AURKA
MyD88-dependent toll-like receptor signaling pathway (GO:0002755)	1/30	0.370536	0.621257	-0.993206	0.986061	IRAK1
negative regulation of blood vessel endothelial cell migration (GO:0043537)	1/32	0.389679	0.630187	-1.04442	0.984293	HDAC5
intra-Golgi vesicle-mediated transport (GO:0006891)	1/34	0.408242	0.632233	-1.08924	0.975843	COG1
erythrocyte differentiation (GO:0030218)	1/36	0.426242	0.634153	-1.13504	0.967906	INHA
negative regulation of phosphorylation (GO:0042326)	2/76	0.324442	0.608696	-0.858601	0.966483	FKBP8;INHA
cytoskeleton-dependent cytokinesis (GO:0061640)	2/71	0.296236	0.604302	-0.792481	0.964131	SON;IST1
regulation of ubiquitin protein ligase activity (GO:1904666)	1/37	0.435036	0.639759	-1.15692	0.962932	FBXO5
regulation of sodium ion transmembrane transport (GO:1902305)	1/31	0.380181	0.625444	-0.987814	0.955323	UTRN
purine ribonucleotide biosynthetic process (GO:0009152)	2/76	0.324442	0.608696	-0.842555	0.948421	AMPD2;PPCDC
regulation of axon extension (GO:0030516)	1/35	0.417311	0.634153	-1.08377	0.947132	NRCAM
activation of MAPK activity (GO:0000187)	3/118	0.270247	0.60193	-0.723422	0.946538	MAP4K2;IRAK1;MAPK8IP3
regulation of insulin receptor signaling pathway (GO:0046626)	1/35	0.417311	0.634153	-1.07762	0.941761	TSC2
positive regulation of cell-matrix adhesion (GO:0001954)	1/34	0.408242	0.632233	-1.04825	0.939123	UTRN
positive regulation of protein targeting to mitochondrion (GO:1903955)	2/82	0.357887	0.621257	-0.913596	0.938754	ZBTB17;HTRA2
epithelial tube morphogenesis (GO:0060562)	1/35	0.417311	0.634153	-1.07087	0.935855	RASIP1
regulation of macromolecule metabolic process (GO:0060255)	3/130	0.320293	0.608696	-0.821157	0.934902	EIF4A2;SRPK3;MAPK12
retrograde transport, endosome to Golgi (GO:0042147)	2/83	0.363406	0.621257	-0.92285	0.934141	TBC1D10C;RHOBTB3
regulation of defense response to virus by virus (GO:0050690)	1/29	0.360741	0.621257	-0.915189	0.933123	DOCK2
tRNA transport (GO:0051031)	1/36	0.426242	0.634153	-1.09375	0.932695	NUP214
global genome nucleotide-excision repair (GO:0070911)	1/33	0.399032	0.632233	-1.01366	0.931267	DDB2
keratan sulfate metabolic process (GO:0042339)	1/35	0.417311	0.634153	-1.05883	0.925333	GALNS
negative regulation of transmembrane receptor protein serine/threonine kinase signaling pathway (GO:0090101)	2/78	0.335648	0.61404	-0.847097	0.924769	PPM1A;CHRD
regulation of defense response (GO:0031347)	2/76	0.324442	0.608696	-0.821383	0.924588	SBNO2;ERAP1
cytoskeleton organization (GO:0007010)	3/127	0.307738	0.608696	-0.781564	0.921078	RHOBTB3;WASF3;FGD2
positive regulation of ubiquitin-protein transferase activity (GO:0051443)	1/32	0.389679	0.630187	-0.972415	0.916436	FBXO5
response to interleukin-1 (GO:0070555)	2/77	0.330052	0.608696	-0.822389	0.911624	PTGIS;IRAK1
positive regulation of muscle cell differentiation (GO:0051149)	1/35	0.417311	0.634153	-1.04223	0.910831	MAPK12
regulation of signal transduction (GO:0009966)	5/234	0.28866	0.604072	-0.731282	0.908621	IRAK1;TSC2;BRAF;RGS11;SENP2
regulation of postsynaptic membrane potential (GO:0060078)	1/34	0.408242	0.632233	-1.00993	0.904791	NPAS4
glycogen metabolic process (GO:0005977)	1/34	0.408242	0.632233	-1.00268	0.898294	GBE1
activation of MAPKK activity (GO:0000186)	1/34	0.408242	0.632233	-1.00101	0.896799	KIDINS220
synaptic vesicle endocytosis (GO:0048488)	1/30	0.370536	0.621257	-0.901321	0.894837	DNM1
double-strand break repair (GO:0006302)	3/142	0.370435	0.621257	-0.900945	0.894707	SFR1;SMC5;SPIDR
transcription, DNA-templated (GO:0006351)	7/357	0.306572	0.608696	-0.755095	0.892752	IRF3;HSF1;MMS19;POLRMT;PTMA;IRF9;GABPA
gene silencing by miRNA (GO:0035195)	1/32	0.389679	0.630187	-0.947276	0.892744	CNOT6
zymogen activation (GO:0031638)	1/37	0.435036	0.639759	-1.06382	0.885447	FGA
Wnt signaling pathway, calcium modulating pathway (GO:0007223)	1/37	0.435036	0.639759	-1.06048	0.882667	PLCB3
negative regulation of neuron death (GO:1901215)	2/84	0.368907	0.621257	-0.883632	0.881168	NRBP2;HTRA2
vasculogenesis (GO:0001570)	1/33	0.399032	0.632233	-0.953892	0.876354	RASIP1
regulation of fat cell differentiation (GO:0045598)	2/73	0.307546	0.608696	-0.743119	0.876234	ASXL1;ARNTL
regulation of cellular response to heat (GO:1900034)	2/79	0.341231	0.61404	-0.8149	0.876177	NUP214;HSF1
regulation of cholesterol biosynthetic process (GO:0045540)	1/41	0.46889	0.654483	-1.15333	0.873518	GGPS1
vesicle-mediated transport (GO:0016192)	8/411	0.294682	0.604302	-0.714698	0.87326	HOOK2;TBC1D10C;CPNE1;RHOBTB3;TSC2;FMN2;MAPK8IP3;DNM1
regulation of sodium ion transmembrane transporter activity (GO:2000649)	1/38	0.443696	0.642373	-1.06526	0.865643	UTRN
mismatch repair (GO:0006298)	1/33	0.399032	0.632233	-0.939233	0.862887	RNASEH2A
negative regulation of cell death (GO:0060548)	2/82	0.357887	0.621257	-0.839588	0.862708	HTRA2;SRSF6
negative regulation of extrinsic apoptotic signaling pathway (GO:2001237)	2/77	0.330052	0.608696	-0.776023	0.860227	FGA;ARHGEF2
negative regulation of epithelial cell migration (GO:0010633)	1/36	0.426242	0.634153	-1.00189	0.854364	PTPRM
positive regulation of NIK/NF-kappaB signaling (GO:1901224)	1/36	0.426242	0.634153	-1.00156	0.854081	IRAK1
generation of neurons (GO:0048699)	3/131	0.32448	0.608696	-0.75856	0.853783	NRBP2;NRCAM;ARNTL
positive regulation of DNA replication (GO:0045740)	1/36	0.426242	0.634153	-0.995034	0.848514	CDT1
protein destabilization (GO:0031648)	1/32	0.389679	0.630187	-0.898896	0.847149	SENP2
antibacterial humoral response (GO:0019731)	1/36	0.426242	0.634153	-0.988957	0.843332	FGA
natural killer cell activation (GO:0030101)	1/37	0.435036	0.639759	-1.00311	0.834916	BAG6
DNA damage checkpoint (GO:0000077)	1/39	0.452224	0.650682	-1.04518	0.829429	USP28
actin polymerization or depolymerization (GO:0008154)	1/37	0.435036	0.639759	-0.992596	0.826164	WASF3
ceramide biosynthetic process (GO:0046513)	1/33	0.399032	0.632233	-0.898897	0.82583	CERS6
ERAD pathway (GO:0036503)	2/78	0.335648	0.61404	-0.755151	0.824392	BAG6;HERPUD1
protein acetylation (GO:0006473)	1/34	0.408242	0.632233	-0.919333	0.823627	NAA40
negative regulation of G0 to G1 transition (GO:0070317)	1/38	0.443696	0.642373	-1.01339	0.823499	EHMT2
regulation of substrate adhesion-dependent cell spreading (GO:1900024)	1/42	0.477033	0.658625	-1.1116	0.822772	FGA
regulation of interferon-beta production (GO:0032648)	1/35	0.417311	0.634153	-0.938713	0.820363	IRF3
regulation of muscle cell differentiation (GO:0051147)	1/37	0.435036	0.639759	-0.984512	0.819435	MAPK12
neuron migration (GO:0001764)	1/41	0.46889	0.654483	-1.0797	0.817748	NRCAM
regulation of type I interferon production (GO:0032479)	2/86	0.379852	0.625444	-0.844172	0.817137	IRF3;IRAK1
regulation of phosphatidylinositol 3-kinase signaling (GO:0014066)	2/81	0.352351	0.621257	-0.780037	0.813678	TSC2;PPP2R5C
response to ionizing radiation (GO:0010212)	2/78	0.335648	0.61404	-0.744848	0.813145	USP28;SPIDR
cellular response to growth factor stimulus (GO:0071363)	3/140	0.362108	0.621257	-0.79882	0.811452	KIDINS220;HTRA2;HFE2
regulation of cellular amide metabolic process (GO:0034248)	1/39	0.452224	0.650682	-1.01803	0.807889	RPL10
apical junction assembly (GO:0043297)	1/36	0.426242	0.634153	-0.942282	0.80353	VCL
negative regulation of DNA binding (GO:0043392)	1/35	0.417311	0.634153	-0.916091	0.800593	CPNE1
positive regulation of protein ubiquitination (GO:0031398)	2/84	0.368907	0.621257	-0.800116	0.797885	FANCI;SENP2
phospholipid biosynthetic process (GO:0008654)	1/38	0.443696	0.642373	-0.977566	0.794386	CPNE1
negative regulation of STAT cascade (GO:1904893)	1/42	0.477033	0.658625	-1.06395	0.787507	HGS
regulation of sodium ion transport (GO:0002028)	1/36	0.426242	0.634153	-0.922869	0.786975	WNK4
positive regulation of peptide hormone secretion (GO:0090277)	1/40	0.460621	0.653363	-1.01121	0.78387	FGA
regulation of protein targeting to mitochondrion (GO:1903214)	2/89	0.396116	0.632233	-0.841296	0.77908	ZBTB17;HTRA2
SRP-dependent cotranslational protein targeting to membrane (GO:0006614)	2/90	0.401495	0.632233	-0.853289	0.778678	RPL10;RPL22
regulation of endothelial cell apoptotic process (GO:2000351)	1/36	0.426242	0.634153	-0.909372	0.775465	FGA
cognition (GO:0050890)	1/41	0.46889	0.654483	-1.02024	0.772715	SOBP
negative regulation of blood coagulation (GO:0030195)	1/37	0.435036	0.639759	-0.922441	0.767772	FGA
establishment of protein localization to membrane (GO:0090150)	2/84	0.368907	0.621257	-0.766241	0.764105	RAB3GAP2;BRAF
positive regulation of phagocytosis (GO:0050766)	1/40	0.460621	0.653363	-0.984047	0.762813	DOCK2
chemical synaptic transmission, postsynaptic (GO:0099565)	1/34	0.408242	0.632233	-0.84897	0.760589	NPAS4
DNA damage response, signal transduction by p53 class mediator (GO:0030330)	2/83	0.363406	0.621257	-0.74659	0.755725	CNOT6;AURKA
phosphatidic acid biosynthetic process (GO:0006654)	1/41	0.46889	0.654483	-0.994103	0.752921	DGKA
cellular response to radiation (GO:0071478)	1/43	0.485051	0.665104	-1.03778	0.750838	SPIDR
DNA-dependent DNA replication maintenance of fidelity (GO:0045005)	1/36	0.426242	0.634153	-0.877622	0.748391	TIMELESS
peptidyl-proline modification (GO:0018208)	1/41	0.46889	0.654483	-0.988077	0.748357	FKBP8
positive regulation of peptide secretion (GO:0002793)	1/36	0.426242	0.634153	-0.876402	0.747351	FGA
protein phosphorylation (GO:0006468)	9/471	0.296038	0.604302	-0.613466	0.746753	NRBP2;MAP4K2;SMG1;IRAK1;WNK4;ULK1;BRAF;MAPK12;AURKA
regulation of response to DNA damage stimulus (GO:2001020)	1/37	0.435036	0.639759	-0.894213	0.744277	SMG1
positive regulation of reactive oxygen species metabolic process (GO:2000379)	1/40	0.460621	0.653363	-0.956575	0.741518	ROMO1
muscle cell differentiation (GO:0042692)	1/37	0.435036	0.639759	-0.890531	0.741212	MAPK12
positive regulation of cell-cell adhesion (GO:0022409)	1/34	0.408242	0.632233	-0.825945	0.739961	FGA
regulation of mitotic nuclear division (GO:0007088)	2/85	0.374389	0.625444	-0.753124	0.739915	FBXO5;AURKA
protein kinase B signaling (GO:0043491)	1/36	0.426242	0.634153	-0.86741	0.739682	TSC2
tRNA aminoacylation (GO:0043039)	1/41	0.46889	0.654483	-0.965679	0.731392	TARS2
regulation of G0 to G1 transition (GO:0070316)	1/40	0.460621	0.653363	-0.942626	0.730705	EHMT2
regulation of ATP metabolic process (GO:1903578)	1/44	0.492947	0.669467	-1.01772	0.719891	NUP214
positive regulation of GTPase activity (GO:0043547)	4/193	0.342061	0.614743	-0.670683	0.719487	ARHGAP42;DOCK8;TBC1D10C;RUNDC1
protein localization to nucleus (GO:0034504)	2/97	0.43848	0.642126	-0.871942	0.718864	NUP214;TSC2
sulfur compound catabolic process (GO:0044273)	1/36	0.426242	0.634153	-0.842704	0.718615	GALNS
endothelial cell migration (GO:0043542)	1/36	0.426242	0.634153	-0.841537	0.71762	PLEKHG5
protein peptidyl-prolyl isomerization (GO:0000413)	1/38	0.443696	0.642373	-0.881393	0.716233	FKBP8
cellular response to organic substance (GO:0071310)	3/134	0.337039	0.61404	-0.655954	0.713386	NDOR1;HTRA2;MAPK12
regulation of nitric oxide biosynthetic process (GO:0045428)	1/33	0.399032	0.632233	-0.77642	0.713308	PTGIS
negative regulation of sequence-specific DNA binding transcription factor activity (GO:0043433)	3/141	0.366274	0.621257	-0.709412	0.712515	ADGRG3;PTGIS;IRAK1
positive regulation of supramolecular fiber organization (GO:1902905)	2/85	0.374389	0.625444	-0.721447	0.708793	NAV3;TOGARAM1
regulation of vesicle-mediated transport (GO:0060627)	3/139	0.357937	0.621257	-0.684623	0.703381	TBC1D10C;RUNDC1;TSC2
carboxylic acid transmembrane transport (GO:1905039)	1/36	0.426242	0.634153	-0.823299	0.702067	SLC6A6
positive regulation of macromolecule biosynthetic process (GO:0010557)	3/143	0.374592	0.625444	-0.711886	0.699013	PYM1;RAB3GAP2;UPF3B
protein transport (GO:0015031)	6/327	0.384562	0.630187	-0.731142	0.698716	SEC23IP;ARRDC1;TBC1D10C;RUNDC1;RAB3GAP2;ARHGEF2
negative regulation of NF-kappaB transcription factor activity (GO:0032088)	2/83	0.363406	0.621257	-0.685966	0.694359	PTGIS;IRAK1
regulation of MAP kinase activity (GO:0043405)	2/88	0.390716	0.630187	-0.738803	0.694308	IRAK1;HGS
regulation of cholesterol metabolic process (GO:0090181)	1/42	0.477033	0.658625	-0.937229	0.693709	GGPS1
cotranslational protein targeting to membrane (GO:0006613)	2/94	0.422777	0.634153	-0.798667	0.687581	RPL10;RPL22
sodium-independent organic anion transport (GO:0043252)	1/38	0.443696	0.642373	-0.844112	0.685938	MFSD10
regulation of intracellular pH (GO:0051453)	1/45	0.500722	0.671466	-0.990743	0.685302	SLC9A5
negative regulation of catabolic process (GO:0009895)	1/41	0.46889	0.654483	-0.902268	0.683366	FMN2
endocytosis (GO:0006897)	5/264	0.378905	0.625444	-0.696145	0.675588	HOOK2;ADORA1;RHOBTB3;TSC2;DNM1
nucleotide-excision repair, DNA incision, 5'-to lesion (GO:0006296)	1/38	0.443696	0.642373	-0.828305	0.673093	DDB2
positive regulation of interleukin-6 production (GO:0032755)	1/44	0.492947	0.669467	-0.950171	0.672108	ARHGEF2
mitotic nuclear envelope disassembly (GO:0007077)	1/45	0.500722	0.671466	-0.970277	0.671145	NUP214
carboxylic acid biosynthetic process (GO:0046394)	1/45	0.500722	0.671466	-0.967353	0.669123	ASPG
cellular response to acid chemical (GO:0071229)	2/92	0.412183	0.634153	-0.753608	0.667913	HTRA2;KCNK4
cellular transition metal ion homeostasis (GO:0046916)	2/94	0.422777	0.634153	-0.773553	0.66596	MT-RNR2;HFE2
macromolecule catabolic process (GO:0009057)	1/35	0.417311	0.634153	-0.761596	0.665577	BACE1
regulation of cell death (GO:0010941)	2/97	0.43848	0.642126	-0.80342	0.662372	HTRA2;SRSF6
regulation of phosphoprotein phosphatase activity (GO:0043666)	1/36	0.426242	0.634153	-0.776632	0.662272	PPP1R12A
regulation of primary metabolic process (GO:0080090)	3/140	0.362108	0.621257	-0.651697	0.662003	TXNRD1;OAZ1;SULT2A1
maturation of SSU-rRNA (GO:0030490)	1/47	0.515917	0.6814	-0.991285	0.656042	TSR1
regulation of coenzyme metabolic process (GO:0051196)	1/40	0.460621	0.653363	-0.840756	0.651737	NUP214
regulation of phagocytosis (GO:0050764)	1/42	0.477033	0.658625	-0.87645	0.648722	DOCK2
positive regulation of transport (GO:0051050)	1/45	0.500722	0.671466	-0.936007	0.647441	BRAF
regulation of cellular pH (GO:0030641)	1/39	0.452224	0.650682	-0.812317	0.644637	SLC9A5
regulation of proteasomal ubiquitin-dependent protein catabolic process (GO:0032434)	2/89	0.396116	0.632233	-0.695951	0.644484	BAG6;RNF180
DNA duplex unwinding (GO:0032508)	1/42	0.477033	0.658625	-0.867254	0.641916	DDB2
regulation of carbohydrate catabolic process (GO:0043470)	1/38	0.443696	0.642373	-0.78988	0.641869	NUP214
cellular response to BMP stimulus (GO:0071773)	2/88	0.390716	0.630187	-0.679543	0.638617	HFE2;INHA
nucleotide-excision repair, DNA incision (GO:0033683)	1/41	0.46889	0.654483	-0.841863	0.637616	DDB2
cellular protein metabolic process (GO:0044267)	9/485	0.325514	0.608696	-0.568013	0.63751	BACE1;FGA;HBS1L;RPL10;RPL22;MXRA8;HTRA2;RRBP1;WDYHV1
regulation of interleukin-6 production (GO:0032675)	1/43	0.485051	0.665104	-0.879658	0.636433	ARHGEF2
negative regulation of type I interferon production (GO:0032480)	1/45	0.500722	0.671466	-0.919266	0.635861	IRF3
chemical homeostasis (GO:0048878)	1/39	0.452224	0.650682	-0.793232	0.629492	WNK4
peptide transport (GO:0015833)	1/42	0.477033	0.658625	-0.848176	0.627794	ARRDC1
phosphatidic acid metabolic process (GO:0046473)	1/42	0.477033	0.658625	-0.839997	0.62174	DGKA
cellular response to fibroblast growth factor stimulus (GO:0044344)	2/95	0.428037	0.636148	-0.732008	0.621143	TIAL1;HNRNPM
negative regulation of protein catabolic process (GO:0042177)	1/40	0.460621	0.653363	-0.796404	0.617356	FMN2
negative regulation of binding (GO:0051100)	2/83	0.363406	0.621257	-0.606749	0.614172	CPNE1;AURKA
organelle assembly (GO:0070925)	7/377	0.35583	0.621257	-0.593939	0.613719	CEP126;HGS;IST1;ATG101;ULK1;CCDC65;PCNT
regulation of stress-activated MAPK cascade (GO:0032872)	1/42	0.477033	0.658625	-0.828012	0.61287	MAPK8IP3
positive regulation of tumor necrosis factor production (GO:0032760)	1/48	0.523341	0.684745	-0.942755	0.610454	ARHGEF2
cellular response to amino acid starvation (GO:0034198)	1/40	0.460621	0.653363	-0.783559	0.607399	WDR24
negative regulation of JAK-STAT cascade (GO:0046426)	1/48	0.523341	0.684745	-0.935432	0.605713	HGS
cellular response to retinoic acid (GO:0071300)	1/43	0.485051	0.665104	-0.831417	0.601531	HTRA2
amide biosynthetic process (GO:0043604)	1/45	0.500722	0.671466	-0.865167	0.59844	CERS6
regulation of protein modification process (GO:0031399)	1/43	0.485051	0.665104	-0.8253	0.597106	ASPSCR1
regulation of generation of precursor metabolites and energy (GO:0043467)	1/47	0.515917	0.6814	-0.898333	0.594525	NUP214
cellular protein complex assembly (GO:0043623)	3/145	0.382889	0.629161	-0.613795	0.589249	FGA;TESPA1;CCDC65
negative regulation of ERBB signaling pathway (GO:1901185)	1/44	0.492947	0.669467	-0.831212	0.587962	HGS
postreplication repair (GO:0006301)	1/48	0.523341	0.684745	-0.903664	0.585142	WDR33
toll-like receptor signaling pathway (GO:0002224)	2/87	0.385294	0.630187	-0.611516	0.583232	FGA;IRAK1
myeloid cell differentiation (GO:0030099)	1/45	0.500722	0.671466	-0.842902	0.583039	INHA
protein complex subunit organization (GO:0071822)	1/46	0.508378	0.679288	-0.857031	0.579808	CDT1
regulation of intracellular transport (GO:0032386)	1/41	0.46889	0.654483	-0.751061	0.568844	NUP214
mitotic DNA damage checkpoint (GO:0044773)	1/40	0.460621	0.653363	-0.728463	0.56469	FANCI
regulation of cellular amine metabolic process (GO:0033238)	1/52	0.551919	0.701804	-0.949266	0.5642	OAZ1
DNA replication-independent nucleosome assembly (GO:0006336)	1/40	0.460621	0.653363	-0.71223	0.552106	CABIN1
regulation of JNK cascade (GO:0046328)	2/91	0.406851	0.632233	-0.613562	0.551782	MAP4K2;MAPK8IP3
alpha-amino acid catabolic process (GO:1901606)	1/40	0.460621	0.653363	-0.710835	0.551025	FTCD
proteolysis involved in cellular protein catabolic process (GO:0051603)	2/94	0.422777	0.634153	-0.633416	0.545314	BAG6;RNF123
ciliary basal body-plasma membrane docking (GO:0097711)	2/97	0.43848	0.642126	-0.655422	0.540356	DCTN2;PCNT
peptidyl-serine phosphorylation (GO:0018105)	3/146	0.387029	0.630187	-0.56714	0.538361	SMG1;ULK1;MAPK12
negative regulation of cell differentiation (GO:0045596)	3/151	0.40762	0.632233	-0.595637	0.534537	ASXL1;CHRD;ARNTL
nucleocytoplasmic transport (GO:0006913)	1/47	0.515917	0.6814	-0.806483	0.533738	EIF5A
regulation of kinase activity (GO:0043549)	2/102	0.464125	0.654483	-0.694356	0.532988	RBL1;KIDINS220
protein targeting to ER (GO:0045047)	2/98	0.443663	0.642373	-0.651911	0.529801	RPL10;RPL22
regulation of telomere maintenance via telomerase (GO:0032210)	1/52	0.551919	0.701804	-0.888195	0.527902	SMG6
protein import into nucleus (GO:0006606)	2/104	0.474189	0.658625	-0.704911	0.525968	NUP214;TSC2
regulation of cell cycle arrest (GO:0071156)	1/49	0.530651	0.689158	-0.827586	0.5244	ZBTB17
adherens junction organization (GO:0034332)	1/45	0.500722	0.671466	-0.757346	0.52386	VCL
negative regulation of I-kappaB kinase/NF-kappaB signaling (GO:0043124)	1/48	0.523341	0.684745	-0.808707	0.523656	PPM1A
regulation of G2/M transition of mitotic cell cycle (GO:0010389)	3/150	0.403517	0.632233	-0.576462	0.52316	DCTN2;PCNT;AURKA
membrane fusion (GO:0061025)	1/55	0.572226	0.716366	-0.929425	0.518825	DNM1
protein complex disassembly (GO:0043241)	1/47	0.515917	0.6814	-0.777606	0.514627	PYM1
cellular response to lipopolysaccharide (GO:0071222)	2/92	0.412183	0.634153	-0.577315	0.511667	SBNO2;IRAK1
regulation of reactive oxygen species metabolic process (GO:2000377)	1/50	0.53785	0.692723	-0.822693	0.510214	ROMO1
regulation of protein ubiquitination (GO:0031396)	2/102	0.464125	0.654483	-0.662887	0.508832	FANCI;SENP2
endosome to lysosome transport (GO:0008333)	1/49	0.530651	0.689158	-0.80177	0.508042	HOOK2
nuclear envelope disassembly (GO:0051081)	1/47	0.515917	0.6814	-0.76425	0.505788	NUP214
positive regulation of sequence-specific DNA binding transcription factor activity (GO:0051091)	4/216	0.421588	0.634153	-0.585497	0.50571	HDAC5;IRAK1;ARID5B;ARHGEF2
protein localization to membrane (GO:0072657)	3/161	0.448132	0.648125	-0.627756	0.503879	TSPAN14;HGS;BRAF
regulation of transcription from RNA polymerase II promoter (GO:0006357)	25/1479	0.331073	0.60907	-0.45515	0.50313	HDAC5;RPL10;HDAC10;EHMT2;ZC3H8;ARNTL;ATAD2B;TIAL1;SBNO2;HSF1;GABPA;ZBTB17;ZGPAT;PPP1R12A;ARID5B;HFE2;RFX1;FOXP4;NPAS4;ASXL1;PPM1A;RBL1;IRF3;ARHGEF2;INHA
protein autoubiquitination (GO:0051865)	1/50	0.53785	0.692723	-0.811089	0.503018	DDB2
negative regulation of protein metabolic process (GO:0051248)	1/44	0.492947	0.669467	-0.711038	0.502956	FMN2
regulation of intrinsic apoptotic signaling pathway (GO:2001242)	1/48	0.523341	0.684745	-0.770876	0.499159	HERPUD1
negative regulation of protein modification by small protein conjugation or removal (GO:1903321)	1/47	0.515917	0.6814	-0.753496	0.49867	SENP2
receptor internalization (GO:0031623)	1/51	0.544939	0.69928	-0.817523	0.496304	DNM1
negative regulation of protein ubiquitination (GO:0031397)	1/51	0.544939	0.69928	-0.810005	0.49174	SENP2
transport of virus (GO:0046794)	1/55	0.572226	0.716366	-0.880527	0.491529	NUP214
negative regulation of proteolysis (GO:0045861)	1/42	0.477033	0.658625	-0.657633	0.486761	BAG6
positive regulation of signal transduction (GO:0009967)	4/207	0.390609	0.630187	-0.51751	0.486483	ASXL1;PPM1A;TSPAN14;PTGIS
icosanoid metabolic process (GO:0006690)	1/47	0.515917	0.6814	-0.733006	0.48511	PTGIS
telomere maintenance (GO:0000723)	1/52	0.551919	0.701804	-0.815378	0.484623	SMC5
protein methylation (GO:0006479)	1/47	0.515917	0.6814	-0.730683	0.483573	EHMT2
regulation of G1/S transition of mitotic cell cycle (GO:2000045)	1/47	0.515917	0.6814	-0.730234	0.483276	RBL1
viral life cycle (GO:0019058)	2/108	0.493971	0.669467	-0.67895	0.478849	NUP214;IST1
response to endoplasmic reticulum stress (GO:0034976)	2/107	0.48907	0.66865	-0.666321	0.476587	BAG6;HERPUD1
cellular response to oxygen-containing compound (GO:1901701)	5/275	0.412198	0.634153	-0.535352	0.474456	SBNO2;HTRA2;ROMO1;PTPRK;KCNK4
ceramide metabolic process (GO:0006672)	1/43	0.485051	0.665104	-0.655755	0.474439	CERS6
cellular response to mechanical stimulus (GO:0071260)	1/49	0.530651	0.689158	-0.745222	0.47221	KCNK4
positive regulation of establishment of protein localization to mitochondrion (GO:1903749)	2/111	0.508495	0.679288	-0.69049	0.466978	ZBTB17;HTRA2
branching morphogenesis of an epithelial tube (GO:0048754)	1/44	0.492947	0.669467	-0.659487	0.466491	RASIP1
RNA methylation (GO:0001510)	1/50	0.53785	0.692723	-0.748489	0.464195	THUMPD3
carboxylic acid transport (GO:0046942)	1/52	0.551919	0.701804	-0.772362	0.459056	SLC6A6
negative regulation of cellular biosynthetic process (GO:0031327)	1/48	0.523341	0.684745	-0.697794	0.451837	PTGIS
negative regulation of ossification (GO:0030279)	1/46	0.508378	0.679288	-0.667341	0.451476	CHRD
positive regulation of transcription, DNA-templated (GO:0045893)	19/1121	0.355895	0.621257	-0.434479	0.448868	ZBTB17;HDAC5;PPP1R12A;ZC3H8;HFE2;ARNTL;ATAD2B;NPAS4;ASXL1;PPM1A;SBNO2;RBL1;IRF3;IRAK1;SFR1;HSF1;MMS19;ARHGEF2;GABPA
regulation of steroid biosynthetic process (GO:0050810)	1/45	0.500722	0.671466	-0.63909	0.442061	GGPS1
tRNA aminoacylation for protein translation (GO:0006418)	1/47	0.515917	0.6814	-0.667823	0.441971	TARS2
antimicrobial humoral immune response mediated by antimicrobial peptide (GO:0061844)	1/50	0.53785	0.692723	-0.711068	0.440987	ROMO1
positive regulation of cell cycle process (GO:0090068)	2/108	0.493971	0.669467	-0.614918	0.433689	ZBTB17;AURKA
negative regulation of mitotic cell cycle (GO:0045930)	1/49	0.530651	0.689158	-0.678189	0.429734	CDT1
intracellular transport of virus (GO:0075733)	1/55	0.572226	0.716366	-0.76556	0.427352	NUP214
G1/S transition of mitotic cell cycle (GO:0000082)	2/106	0.484139	0.665104	-0.586154	0.425187	CDT1;FBXO5
MAPK cascade (GO:0000165)	5/279	0.424251	0.634153	-0.494667	0.424143	SPTA1;MAP4K2;HSF1;BRAF;SPTAN1
regulation of cell-matrix adhesion (GO:0001952)	1/53	0.558792	0.707972	-0.728133	0.423757	UTRN
regulation of telomerase activity (GO:0051972)	1/43	0.485051	0.665104	-0.584748	0.423066	SMG6
regulation of axonogenesis (GO:0050770)	1/56	0.578789	0.719631	-0.772193	0.422249	NRCAM
myeloid leukocyte differentiation (GO:0002573)	1/51	0.544939	0.69928	-0.693967	0.421295	SBNO2
glycerophospholipid biosynthetic process (GO:0046474)	3/165	0.46403	0.654483	-0.543573	0.417358	ETNK1;DGKA;CPNE1
cellular response to starvation (GO:0009267)	2/108	0.493971	0.669467	-0.584903	0.41252	EHMT2;WDR24
phosphatidylinositol metabolic process (GO:0046488)	2/113	0.518026	0.682897	-0.626065	0.411781	SMG1;IP6K2
negative regulation of cellular component organization (GO:0051129)	1/55	0.572226	0.716366	-0.737541	0.411712	ULK1
axon guidance (GO:0007411)	3/159	0.440112	0.642373	-0.501517	0.411608	SPTA1;PTPRM;SPTAN1
embryonic organ development (GO:0048568)	1/54	0.565561	0.713963	-0.721083	0.410972	RPL10
negative regulation of transcription, DNA-templated (GO:0045892)	14/814	0.365418	0.621257	-0.406752	0.409483	HDAC5;ZGPAT;RPL10;HDAC10;EHMT2;ZC3H8;ARID5B;HFE2;PTPRK;ARNTL;PPM1A;SBNO2;HSF1;TIMELESS
regulation of BMP signaling pathway (GO:0030510)	1/57	0.585251	0.724119	-0.76242	0.408439	CHRD
intrinsic apoptotic signaling pathway (GO:0097193)	2/102	0.464125	0.654483	-0.530481	0.407198	BAG6;HTRA2
regulation of posttranscriptional gene silencing (GO:0060147)	1/56	0.578789	0.719631	-0.744171	0.406926	NUP214
regulation of epithelial cell migration (GO:0010632)	1/49	0.530651	0.689158	-0.641635	0.406572	CAPN7
regulation of gene silencing by RNA (GO:0060966)	1/56	0.578789	0.719631	-0.740567	0.404955	NUP214
negative regulation of cytokine production (GO:0001818)	2/111	0.508495	0.679288	-0.595923	0.403022	IRF3;NAV3
regulation of cellular protein metabolic process (GO:0032268)	1/51	0.544939	0.69928	-0.661815	0.401776	RPL10
negative regulation of cellular macromolecule biosynthetic process (GO:2000113)	9/513	0.385892	0.630187	-0.418585	0.398576	HDAC5;SBNO2;ZGPAT;HDAC10;TIMELESS;ZC3H8;ARID5B;PTPRK;ARNTL
regulation of epidermal growth factor receptor signaling pathway (GO:0042058)	1/59	0.597882	0.728489	-0.767388	0.394715	HGS
positive regulation of cellular component organization (GO:0051130)	2/107	0.48907	0.66865	-0.547965	0.391932	CDT1;SPIDR
aminoglycan biosynthetic process (GO:0006023)	1/47	0.515917	0.6814	-0.589873	0.390383	NDST2
sphingolipid metabolic process (GO:0006665)	2/117	0.536717	0.692723	-0.615993	0.383323	CERS6;ARSK
tRNA modification (GO:0006400)	1/58	0.591615	0.724933	-0.722475	0.379226	THUMPD3
regulation of cellular ketone metabolic process (GO:0010565)	1/62	0.616112	0.740392	-0.780252	0.377897	OAZ1
metaphase plate congression (GO:0051310)	1/45	0.500722	0.671466	-0.544835	0.376865	KIF22
negative regulation of cellular process (GO:0048523)	9/535	0.433843	0.639759	-0.442997	0.369935	ZBTB17;HGS;HTRA2;TSC2;PTPRK;PPP2R5C;INHA;SRSF6;IP6K2
regulation of exocytosis (GO:0017157)	1/52	0.551919	0.701804	-0.618473	0.367592	FGA
positive regulation of neuron projection development (GO:0010976)	2/98	0.443663	0.642373	-0.45023	0.365897	ITSN2;KIDINS220
negative regulation of signal transduction (GO:0009968)	5/284	0.439252	0.642373	-0.442838	0.364315	ASXL1;ARRDC1;HGS;TSC2;BRAF
positive regulation of cell morphogenesis involved in differentiation (GO:0010770)	1/59	0.597882	0.728489	-0.702984	0.361588	FGA
regulation of neurogenesis (GO:0050767)	1/58	0.591615	0.724933	-0.680349	0.357115	ARNTL
regulation of protein metabolic process (GO:0051246)	1/60	0.604052	0.731551	-0.684935	0.345272	HGS
epidermal growth factor receptor signaling pathway (GO:0007173)	1/58	0.591615	0.724933	-0.653702	0.343127	DGKD
regulation of glycolytic process (GO:0006110)	1/58	0.591615	0.724933	-0.651711	0.342082	NUP214
regulation of cellular amino acid metabolic process (GO:0006521)	1/52	0.551919	0.701804	-0.574455	0.341429	OAZ1
regulation of phosphorylation (GO:0042325)	2/120	0.550405	0.701804	-0.570937	0.340907	NUP214;INHA
histone H4 acetylation (GO:0043967)	1/48	0.523341	0.684745	-0.523895	0.339234	NAA40
positive regulation of pathway-restricted SMAD protein phosphorylation (GO:0010862)	1/48	0.523341	0.684745	-0.521752	0.337846	INHA
regulation of protein kinase B signaling (GO:0051896)	3/164	0.460074	0.653363	-0.434873	0.337622	CPNE1;TSC2;PPP2R5C
regulation of tumor necrosis factor-mediated signaling pathway (GO:0010803)	1/57	0.585251	0.724119	-0.624854	0.334743	CPNE1
amino acid transport (GO:0006865)	1/49	0.530651	0.689158	-0.527449	0.334218	SLC6A6
negative regulation of cellular response to transforming growth factor beta stimulus (GO:1903845)	1/54	0.565561	0.713963	-0.582854	0.332191	PPM1A
positive regulation of protein modification process (GO:0031401)	3/164	0.460074	0.653363	-0.424412	0.3295	ASPSCR1;RAB3GAP2;ARNTL
tRNA processing (GO:0008033)	1/63	0.622004	0.743008	-0.692114	0.328622	ELAC2
potassium ion transport (GO:0006813)	1/62	0.616112	0.740392	-0.677826	0.328289	KCNK4
epithelium development (GO:0060429)	2/116	0.532091	0.689747	-0.519327	0.327665	TIMELESS;VCL
negative regulation of programmed cell death (GO:0043069)	7/409	0.435731	0.640108	-0.394229	0.327498	SON;IRAK1;RPL10;MT-RNR2;BRAF;FMN2;ARHGEF2
mitotic cytokinesis (GO:0000281)	1/60	0.604052	0.731551	-0.649402	0.32736	SON
regulation of tumor necrosis factor production (GO:0032680)	1/62	0.616112	0.740392	-0.674697	0.326774	ARHGEF2
regulation of JAK-STAT cascade (GO:0046425)	1/66	0.639143	0.749414	-0.725323	0.324674	HGS
IRE1-mediated unfolded protein response (GO:0036498)	1/58	0.591615	0.724933	-0.612497	0.321499	ZBTB17
ubiquitin-dependent ERAD pathway (GO:0030433)	1/59	0.597882	0.728489	-0.619646	0.318723	BAG6
regulation of Rho protein signal transduction (GO:0035023)	1/58	0.591615	0.724933	-0.607159	0.318697	ARHGEF2
glycosaminoglycan metabolic process (GO:0030203)	1/62	0.616112	0.740392	-0.657307	0.318352	NDST2
receptor metabolic process (GO:0043112)	1/59	0.597882	0.728489	-0.615708	0.316697	DNM1
positive regulation of transcription from RNA polymerase II promoter (GO:0045944)	14/849	0.425733	0.634153	-0.370362	0.316268	ZBTB17;HDAC5;PPP1R12A;HFE2;ARNTL;ATAD2B;NPAS4;ASXL1;SBNO2;RBL1;IRF3;HSF1;ARHGEF2;GABPA
post-translational protein modification (GO:0043687)	6/358	0.468556	0.654483	-0.417185	0.316268	FGA;GPS1;ARSK;MXRA8;UBXN7;DDB2
cilium assembly (GO:0060271)	5/289	0.454163	0.652801	-0.39852	0.314552	CEP126;DCTN2;TOGARAM1;CCDC65;PCNT
cellular response to cytokine stimulus (GO:0071345)	8/457	0.40005	0.632233	-0.341713	0.313066	SBNO2;SELPLG;PTGIS;LRCH1;IRAK1;DOCK8;HTRA2;ARHGEF2
positive regulation of secretion by cell (GO:1903532)	1/53	0.558792	0.707972	-0.528842	0.307774	FGA
positive regulation of NF-kappaB transcription factor activity (GO:0051092)	2/129	0.589744	0.724933	-0.571865	0.301983	IRAK1;ARHGEF2
regulation of pathway-restricted SMAD protein phosphorylation (GO:0060393)	1/60	0.604052	0.731551	-0.597758	0.301326	INHA
glycerophospholipid metabolic process (GO:0006650)	1/65	0.633518	0.747829	-0.641033	0.29261	CPNE1
peptidyl-lysine modification (GO:0018205)	2/116	0.532091	0.689747	-0.462081	0.291546	NUP214;SENP2
negative regulation of transforming growth factor beta receptor signaling pathway (GO:0030512)	1/56	0.578789	0.719631	-0.533165	0.291544	PPM1A
arachidonic acid metabolic process (GO:0019369)	1/52	0.551919	0.701804	-0.488436	0.290304	PTGIS
platelet degranulation (GO:0002576)	2/125	0.572581	0.716366	-0.519562	0.289708	FGA;VCL
apoptotic process (GO:0006915)	4/232	0.475611	0.658625	-0.388252	0.288531	EIF5A;BAG6;IRF3;TSC2
transcription from RNA polymerase II promoter (GO:0006366)	8/486	0.467196	0.654483	-0.378274	0.287869	IRF3;ZC3H8;UPF3B;SRSF6;SRSF7;IRF9;GABPA;WDR33
vesicle organization (GO:0016050)	2/128	0.585502	0.724119	-0.532505	0.285042	HOOK2;DNM1
glycosaminoglycan catabolic process (GO:0006027)	1/57	0.585251	0.724119	-0.529725	0.283781	GALNS
regulation of protein secretion (GO:0050708)	2/108	0.493971	0.669467	-0.401139	0.282915	FGA;ARNTL
negative regulation of neuron apoptotic process (GO:0043524)	1/64	0.627805	0.744854	-0.605134	0.281705	NRBP2
plasma membrane bounded cell projection organization (GO:0120036)	2/119	0.545874	0.699838	-0.464524	0.281208	PTPRM;ULK1
positive regulation of cysteine-type endopeptidase activity (GO:2001056)	1/56	0.578789	0.719631	-0.512517	0.280254	HTRA2
triglyceride metabolic process (GO:0006641)	1/53	0.558792	0.707972	-0.475392	0.276667	DGAT1
cell junction assembly (GO:0034329)	1/60	0.604052	0.731551	-0.546698	0.275588	VCL
negative regulation of dephosphorylation (GO:0035305)	1/64	0.627805	0.744854	-0.586687	0.273118	PPP1R12A
phosphate-containing compound metabolic process (GO:0006796)	3/184	0.536538	0.692723	-0.436652	0.271867	PPM1A;PLCB3;IP6K2
response to light stimulus (GO:0009416)	1/59	0.597882	0.728489	-0.524792	0.269933	DDB2
enzyme linked receptor protein signaling pathway (GO:0007167)	2/121	0.554904	0.704959	-0.457438	0.269413	IRAK1;PTPRF
nucleosome assembly (GO:0006334)	1/61	0.610128	0.736997	-0.544163	0.268863	CABIN1
protein homooligomerization (GO:0051260)	3/191	0.561821	0.710523	-0.460745	0.265653	DGKD;HSF1;HTRA2
positive regulation of endocytosis (GO:0045807)	1/65	0.633518	0.747829	-0.577165	0.263457	DOCK2
negative regulation of cellular catabolic process (GO:0031330)	1/57	0.585251	0.724119	-0.491172	0.263128	RASIP1
positive regulation of developmental growth (GO:0048639)	1/52	0.551919	0.701804	-0.442268	0.262864	ITSN2
organic anion transport (GO:0015711)	2/125	0.572581	0.716366	-0.471022	0.262642	SLC6A6;MFSD10
negative regulation of cell cycle G2/M phase transition (GO:1902750)	1/70	0.660798	0.761413	-0.63362	0.262514	AURKA
Golgi organization (GO:0007030)	2/122	0.559371	0.708065	-0.446724	0.259521	SEC23IP;COG1
renal system development (GO:0072001)	1/60	0.604052	0.731551	-0.510554	0.257367	BAG6
vesicle targeting, rough ER to cis-Golgi (GO:0048207)	1/64	0.627805	0.744854	-0.551734	0.256846	SEC23IP
regulation of cell proliferation (GO:0042127)	12/741	0.46196	0.654483	-0.331839	0.256272	EIF5A;ZBTB17;CNOT6;HGS;HSF1;TSC2;NAP1L1;ROMO1;ARHGEF2;PTPRK;PPP2R5C;INHA
negative regulation of MAP kinase activity (GO:0043407)	1/62	0.616112	0.740392	-0.521008	0.252338	GPS1
histone acetylation (GO:0016573)	1/72	0.671134	0.76701	-0.631905	0.251995	NAA40
Notch signaling pathway (GO:0007219)	1/56	0.578789	0.719631	-0.458486	0.250708	NLE1
organonitrogen compound biosynthetic process (GO:1901566)	3/182	0.529165	0.689158	-0.39023	0.248364	CERS6;ASPG;INHA
cellular response to lipid (GO:0071396)	3/179	0.517984	0.682897	-0.375123	0.24676	SBNO2;HTRA2;KCNK4
glycolipid metabolic process (GO:0006664)	1/66	0.639143	0.749414	-0.548714	0.245619	ARSK
nucleic acid phosphodiester bond hydrolysis (GO:0090305)	1/74	0.681156	0.771536	-0.639641	0.245599	DDB2
negative regulation of G2/M transition of mitotic cell cycle (GO:0010972)	1/63	0.622004	0.743008	-0.51592	0.244964	AURKA
chloride transmembrane transport (GO:1902476)	1/58	0.591615	0.724933	-0.466169	0.244692	CLCN2
regulation of angiogenesis (GO:0045765)	3/178	0.514225	0.6814	-0.367072	0.244137	PTGIS;HGS;PTPRM
positive regulation of cell death (GO:0010942)	1/58	0.591615	0.724933	-0.464404	0.243765	HTRA2
regulation of actin filament-based process (GO:0032970)	1/63	0.622004	0.743008	-0.510065	0.242184	RHOBTB3
sphingolipid biosynthetic process (GO:0030148)	1/67	0.644683	0.754015	-0.550168	0.241522	CERS6
COPII vesicle coating (GO:0048208)	1/64	0.627805	0.744854	-0.517335	0.240832	SEC23IP
regulation of programmed cell death (GO:0043067)	4/269	0.591856	0.724933	-0.457806	0.240115	MAP4K2;RBM25;PTGIS;INHA
homophilic cell adhesion via plasma membrane adhesion molecules (GO:0007156)	1/65	0.633518	0.747829	-0.521528	0.23806	PTPRM
kidney development (GO:0001822)	1/64	0.627805	0.744854	-0.508079	0.236524	BAG6
response to metal ion (GO:0010038)	1/73	0.676184	0.769015	-0.599414	0.234545	FGA
regulation of translational initiation (GO:0006446)	1/63	0.622004	0.743008	-0.492849	0.234009	EIF4A2
regulation of osteoblast differentiation (GO:0045667)	1/70	0.660798	0.761413	-0.564502	0.233877	CHRD
axonogenesis (GO:0007409)	4/224	0.448805	0.648428	-0.289514	0.231949	SPTA1;ULK1;NRCAM;SPTAN1
defense response to Gram-negative bacterium (GO:0050829)	1/72	0.671134	0.76701	-0.580127	0.231347	ROMO1
gland development (GO:0048732)	1/76	0.690874	0.778763	-0.625045	0.23114	ARID5B
modification-dependent protein catabolic process (GO:0019941)	2/142	0.641964	0.752091	-0.518235	0.229694	BAG6;ARRDC1
peptidyl-serine modification (GO:0018209)	3/171	0.487493	0.667799	-0.319012	0.229203	SMG1;ULK1;MAPK12
peptidyl-threonine phosphorylation (GO:0018107)	1/69	0.655509	0.760863	-0.541145	0.228549	ULK1
snRNA transcription (GO:0009301)	1/71	0.666006	0.764269	-0.561775	0.228338	ZC3H8
cellular response to hypoxia (GO:0071456)	2/133	0.606391	0.733749	-0.450619	0.225413	PTGIS;FMN2
negative regulation of protein modification process (GO:0031400)	1/64	0.627805	0.744854	-0.480807	0.223828	FKBP8
transcription-coupled nucleotide-excision repair (GO:0006283)	1/74	0.681156	0.771536	-0.581707	0.223354	GPS1
negative regulation of ubiquitin-protein ligase activity involved in mitotic cell cycle (GO:0051436)	1/72	0.671134	0.76701	-0.558476	0.222713	FBXO5
regulation of neuron death (GO:1901214)	1/73	0.676184	0.769015	-0.567949	0.222233	HTRA2
regulation of signal transduction by p53 class mediator (GO:1901796)	2/139	0.630395	0.747293	-0.474519	0.218947	EHMT2;AURKA
regulation of phosphatase activity (GO:0010921)	1/73	0.676184	0.769015	-0.5585	0.218536	PPP1R12A
vascular endothelial growth factor receptor signaling pathway (GO:0048010)	1/71	0.666006	0.764269	-0.536675	0.218135	MAPK12
RNA processing (GO:0006396)	3/194	0.572398	0.716366	-0.389537	0.217331	HNRNPL;SON;SRSF7
negative regulation of response to stimulus (GO:0048585)	2/128	0.585502	0.724119	-0.405464	0.217039	RBL1;BRAF
regulation of DNA replication (GO:0006275)	1/62	0.616112	0.740392	-0.442059	0.214101	EHMT2
glycosphingolipid metabolic process (GO:0006687)	1/55	0.572226	0.716366	-0.380593	0.212455	ARSK
negative regulation of ubiquitin protein ligase activity (GO:1904667)	1/78	0.700297	0.78496	-0.586078	0.208791	FBXO5
regulation of innate immune response (GO:0045088)	1/70	0.660798	0.761413	-0.503838	0.208744	ERAP1
cell morphogenesis (GO:0000902)	1/60	0.604052	0.731551	-0.412748	0.208064	ARHGEF2
regulation of endothelial cell proliferation (GO:0001936)	1/80	0.709433	0.789512	-0.595041	0.204271	PTPRM
regulation of gene silencing by miRNA (GO:0060964)	1/68	0.650137	0.759126	-0.472627	0.2035	NUP214
vesicle coating (GO:0006901)	1/64	0.627805	0.744854	-0.436466	0.203186	SEC23IP
positive regulation of mitochondrion organization (GO:0010822)	2/129	0.589744	0.724933	-0.382089	0.201768	ZBTB17;HTRA2
COPII-coated vesicle budding (GO:0090114)	1/69	0.655509	0.760863	-0.475884	0.200987	SEC23IP
NIK/NF-kappaB signaling (GO:0038061)	1/81	0.713897	0.790708	-0.594464	0.200344	IRAK1
regulation of actin cytoskeleton organization (GO:0032956)	1/76	0.690874	0.778763	-0.540577	0.199904	RHOBTB3
regulation of G-protein coupled receptor protein signaling pathway (GO:0008277)	1/75	0.686053	0.774814	-0.529258	0.199425	RGS11
regulation of actin filament polymerization (GO:0030833)	1/69	0.655509	0.760863	-0.470629	0.198767	KANK3
inorganic anion transmembrane transport (GO:0098661)	1/65	0.633518	0.747829	-0.435194	0.198652	CLCN2
positive regulation of binding (GO:0051099)	1/82	0.718292	0.793693	-0.591961	0.195868	CDT1
ephrin receptor signaling pathway (GO:0048013)	1/83	0.72262	0.794088	-0.596082	0.193651	DNM1
negative regulation of phosphatase activity (GO:0010923)	1/69	0.655509	0.760863	-0.458079	0.193467	PPP1R12A
cilium organization (GO:0044782)	3/193	0.56889	0.716366	-0.342416	0.193146	CEP126;CCDC65;PCNT
positive regulation of ubiquitin-protein ligase activity involved in regulation of mitotic cell cycle transition (GO:0051437)	1/77	0.695622	0.780971	-0.524862	0.190498	FBXO5
protein-DNA complex assembly (GO:0065004)	1/92	0.758707	0.818328	-0.673996	0.186117	DDB2
stress-activated protein kinase signaling cascade (GO:0031098)	1/71	0.666006	0.764269	-0.452726	0.184014	MAP4K2
negative regulation of transcription from RNA polymerase II promoter (GO:0000122)	9/566	0.500716	0.671466	-0.262709	0.18172	HDAC5;PPM1A;ZGPAT;RPL10;HDAC10;EHMT2;HSF1;ARID5B;HFE2
positive regulation of protein catabolic process (GO:0045732)	1/82	0.718292	0.793693	-0.547566	0.181178	OAZ1
antigen processing and presentation of exogenous peptide antigen via MHC class I (GO:0042590)	1/79	0.7049	0.788211	-0.515698	0.180339	IFI30
anaphase-promoting complex-dependent catabolic process (GO:0031145)	1/80	0.709433	0.789512	-0.524615	0.180094	AURKA
positive regulation of protein secretion (GO:0050714)	1/83	0.72262	0.794088	-0.538644	0.17499	FGA
ERBB signaling pathway (GO:0038127)	1/81	0.713897	0.790708	-0.514407	0.173364	DGKD
muscle contraction (GO:0006936)	2/138	0.626475	0.744854	-0.368089	0.172136	UTRN;VCL
positive regulation of catabolic process (GO:0009896)	1/63	0.622004	0.743008	-0.360461	0.17115	OAZ1
transforming growth factor beta receptor signaling pathway (GO:0007179)	1/77	0.695622	0.780971	-0.468635	0.170091	PTPRK
positive regulation of cell cycle (GO:0045787)	1/83	0.72262	0.794088	-0.522967	0.169897	HSF1
positive regulation of stress-activated MAPK cascade (GO:0032874)	1/81	0.713897	0.790708	-0.495504	0.166993	MAP4K2
neuron development (GO:0048666)	2/145	0.653246	0.760863	-0.391626	0.166755	PTPRM;ULK1
positive regulation of epithelial cell migration (GO:0010634)	1/75	0.686053	0.774814	-0.435941	0.164263	CAPN7
regulation of cell migration (GO:0030334)	5/317	0.53522	0.692723	-0.261481	0.163446	ADGRG3;NAV3;CHRD;PTPRK;VCL
response to lipid (GO:0033993)	2/141	0.638139	0.749414	-0.362775	0.162958	ASXL1;IRAK1
organic substance transport (GO:0071702)	1/88	0.743285	0.809175	-0.544546	0.161553	SLC50A1
positive regulation of cell adhesion (GO:0045785)	1/65	0.633518	0.747829	-0.346655	0.158236	CHRD
skeletal system development (GO:0001501)	2/147	0.66061	0.761413	-0.380124	0.157597	CHRD;INHA
regulation of ubiquitin-protein ligase activity involved in mitotic cell cycle (GO:0051439)	1/73	0.676184	0.769015	-0.399339	0.156257	FBXO5
negative regulation of cell communication (GO:0010648)	1/79	0.7049	0.788211	-0.446649	0.156193	BRAF
positive regulation of Wnt signaling pathway (GO:0030177)	2/141	0.638139	0.749414	-0.343945	0.1545	PPM1A;ARNTL
regulation of protein serine/threonine kinase activity (GO:0071900)	1/81	0.713897	0.790708	-0.455085	0.153371	HGS
regulation of peptidyl-tyrosine phosphorylation (GO:0050730)	1/86	0.73521	0.802881	-0.494689	0.152166	ARHGEF2
rRNA processing (GO:0006364)	3/203	0.603166	0.731551	-0.300036	0.151687	RPL10;RPL22;TSR1
ribosome biogenesis (GO:0042254)	3/227	0.677839	0.770272	-0.387483	0.150671	RPL10;RPL22;TSR1
regulation of endothelial cell migration (GO:0010594)	1/70	0.660798	0.761413	-0.354092	0.146703	PTPRM
positive regulation of transmembrane receptor protein serine/threonine kinase signaling pathway (GO:0090100)	1/83	0.72262	0.794088	-0.448446	0.145688	INHA
regulation of protein kinase activity (GO:0045859)	2/148	0.664244	0.764269	-0.354416	0.144994	KIDINS220;TSC2
protein modification process (GO:0036211)	1/85	0.731078	0.798992	-0.444711	0.139299	WDYHV1
regulation of endocytosis (GO:0030100)	1/70	0.660798	0.761413	-0.335551	0.139021	TSC2
mitochondrial translational elongation (GO:0070125)	1/88	0.743285	0.809175	-0.468014	0.138848	MRPL2
regulation of transcription from RNA polymerase II promoter in response to stress (GO:0043618)	1/94	0.766067	0.822465	-0.520907	0.138814	HSF1
snRNA transcription from RNA polymerase II promoter (GO:0042795)	1/71	0.666006	0.764269	-0.338832	0.137721	ZC3H8
regulation of cytokine-mediated signaling pathway (GO:0001959)	1/91	0.75494	0.815522	-0.48632	0.136713	IRAK1
mitotic sister chromatid segregation (GO:0000070)	1/83	0.72262	0.794088	-0.40774	0.132464	KIF22
regulation of neuron apoptotic process (GO:0043523)	1/90	0.751115	0.812644	-0.460874	0.131901	NRBP2
second-messenger-mediated signaling (GO:0019932)	1/63	0.622004	0.743008	-0.275291	0.130711	DGKD
negative regulation of translation (GO:0017148)	1/89	0.74723	0.811577	-0.448169	0.130588	CNOT6
positive regulation of cell growth (GO:0030307)	1/99	0.783505	0.833516	-0.534944	0.130515	ITSN2
defense response to Gram-positive bacterium (GO:0050830)	1/66	0.639143	0.749414	-0.28898	0.129355	ROMO1
cellular response to interleukin-1 (GO:0071347)	2/151	0.67496	0.769015	-0.327109	0.128587	PTGIS;IRAK1
metal ion transport (GO:0030001)	1/102	0.793339	0.840148	-0.554998	0.128484	KCNK4
modulation of chemical synaptic transmission (GO:0050804)	1/83	0.72262	0.794088	-0.393663	0.12789	NPAS4
negative regulation of kinase activity (GO:0033673)	1/92	0.758707	0.818328	-0.456539	0.126069	TSC2
glycosaminoglycan biosynthetic process (GO:0006024)	1/100	0.786834	0.835787	-0.524669	0.125783	NDST2
negative regulation of macromolecule metabolic process (GO:0010605)	2/125	0.572581	0.716366	-0.223316	0.124521	RBL1;CPNE1
axon development (GO:0061564)	1/95	0.769663	0.82506	-0.473099	0.123858	NRCAM
protein modification by small protein conjugation (GO:0032446)	6/399	0.574079	0.717598	-0.222615	0.123549	NUP214;KBTBD3;HERC4;ARRDC1;MIB2;SENP2
purine ribonucleotide metabolic process (GO:0009150)	1/67	0.644683	0.754015	-0.281378	0.123524	SULT2A1
monovalent inorganic cation transport (GO:0015672)	1/105	0.802728	0.84625	-0.554113	0.12176	KCNK4
nitrogen compound transport (GO:0071705)	1/75	0.686053	0.774814	-0.322383	0.121474	SLC6A6
cell-cell junction assembly (GO:0007043)	1/80	0.709433	0.789512	-0.343498	0.117919	VCL
cell cycle G1/S phase transition (GO:0044843)	1/93	0.762415	0.819801	-0.429804	0.11659	CDT1
translational elongation (GO:0006414)	1/106	0.805762	0.848809	-0.530912	0.114659	MRPL2
negative regulation of signaling (GO:0023057)	1/84	0.726881	0.797519	-0.355413	0.113374	BRAF
translational termination (GO:0006415)	1/97	0.776691	0.829418	-0.442063	0.111715	MRPL2
positive regulation of cellular metabolic process (GO:0031325)	1/93	0.762415	0.819801	-0.400409	0.108617	ROMO1
positive regulation of epithelial cell proliferation (GO:0050679)	1/108	0.811692	0.851792	-0.517564	0.107982	SRSF6
mitochondrial translation (GO:0032543)	1/108	0.811692	0.851792	-0.512398	0.106904	MRPL2
regulation of cysteine-type endopeptidase activity involved in apoptotic process (GO:0043281)	1/94	0.766067	0.822465	-0.400481	0.106722	HTRA2
regulation of transforming growth factor beta receptor signaling pathway (GO:0017015)	1/80	0.709433	0.789512	-0.304704	0.104602	PPM1A
regulation of complement activation (GO:0030449)	1/110	0.817441	0.851792	-0.513384	0.103486	CFI
response to insulin (GO:0032868)	1/72	0.671134	0.76701	-0.256888	0.102444	HDAC5
negative regulation of protein phosphorylation (GO:0001933)	2/179	0.762022	0.819801	-0.376331	0.102279	FKBP8;TSC2
positive regulation of apoptotic signaling pathway (GO:2001235)	1/77	0.695622	0.780971	-0.276076	0.100202	HTRA2
response to tumor necrosis factor (GO:0034612)	1/98	0.780124	0.831816	-0.39346	0.0976969	ARHGEF2
positive regulation of T cell activation (GO:0050870)	1/69	0.655509	0.760863	-0.225905	0.0954098	DOCK8
negative regulation of apoptotic process (GO:0043066)	7/486	0.616987	0.740808	-0.196194	0.0947436	NRBP2;SON;IRAK1;RPL10;MT-RNR2;BRAF;FMN2
negative regulation of cellular protein metabolic process (GO:0032269)	1/90	0.751115	0.812644	-0.329505	0.0943032	BAG6
rRNA metabolic process (GO:0016072)	3/201	0.596456	0.728489	-0.180817	0.0934372	RPL10;RPL22;TSR1
negative regulation of inflammatory response (GO:0050728)	1/79	0.7049	0.788211	-0.265203	0.0927411	PTGIS
positive regulation of ubiquitin protein ligase activity (GO:1904668)	1/83	0.72262	0.794088	-0.283756	0.0921843	FBXO5
activation of protein kinase activity (GO:0032147)	3/234	0.697561	0.78252	-0.252408	0.0909085	MAP4K2;IRAK1;KIDINS220
Wnt signaling pathway (GO:0016055)	1/110	0.817441	0.851792	-0.439433	0.0885794	PPM1A
membrane lipid biosynthetic process (GO:0046467)	1/61	0.610128	0.736997	-0.179048	0.0884651	CERS6
positive regulation of protein ubiquitination involved in ubiquitin-dependent protein catabolic process (GO:2000060)	1/88	0.743285	0.809175	-0.295146	0.0875628	FBXO5
negative regulation of protein kinase activity (GO:0006469)	1/110	0.817441	0.851792	-0.419021	0.0844648	TSC2
negative regulation of defense response (GO:0031348)	1/81	0.713897	0.790708	-0.24552	0.0827443	PTGIS
positive regulation of angiogenesis (GO:0045766)	1/104	0.799647	0.84491	-0.368394	0.0823673	PTGIS
positive regulation of JNK cascade (GO:0046330)	1/77	0.695622	0.780971	-0.221743	0.0804813	MAP4K2
positive regulation of peptidyl-tyrosine phosphorylation (GO:0050731)	1/117	0.83622	0.862717	-0.442693	0.0791819	ARHGEF2
mitochondrial translational termination (GO:0070126)	1/90	0.751115	0.812644	-0.274383	0.0785275	MRPL2
regulation of response to external stimulus (GO:0032101)	1/108	0.811692	0.851792	-0.375361	0.0783132	SBNO2
steroid metabolic process (GO:0008202)	1/100	0.786834	0.835787	-0.3218	0.0771476	SULT2A1
negative regulation of cell growth (GO:0030308)	1/116	0.83366	0.861346	-0.41891	0.0762123	IP6K2
positive regulation of protein metabolic process (GO:0051247)	1/97	0.776691	0.829418	-0.289511	0.0731631	OAZ1
regulation of protein phosphorylation (GO:0001932)	3/262	0.767333	0.823192	-0.27517	0.0728746	KIDINS220;FKBP8;INHA
regulation of insulin secretion (GO:0050796)	1/99	0.783505	0.833516	-0.296684	0.0723843	ARNTL
cellular calcium ion homeostasis (GO:0006874)	1/124	0.853072	0.874305	-0.450448	0.0715813	HERPUD1
positive regulation of cell differentiation (GO:0045597)	2/195	0.802135	0.84625	-0.318366	0.0701931	MAPK12;ARNTL
cell morphogenesis involved in neuron differentiation (GO:0048667)	1/98	0.780124	0.831816	-0.278892	0.0692495	NRCAM
proteasome-mediated ubiquitin-dependent protein catabolic process (GO:0043161)	4/292	0.655972	0.760863	-0.161229	0.0679801	BAG6;PPP2R5C;AURKA;ARNTL
regulation of acute inflammatory response (GO:0002673)	1/122	0.848442	0.870835	-0.410444	0.067458	CFI
positive regulation of cytokine production (GO:0001819)	3/221	0.660194	0.761413	-0.159283	0.0661378	IRF3;IRAK1;ARHGEF2
positive regulation of cellular biosynthetic process (GO:0031328)	2/160	0.705449	0.788211	-0.186867	0.0652017	PYM1;UPF3B
negative regulation of Wnt signaling pathway (GO:0030178)	2/175	0.750953	0.812644	-0.227003	0.0650164	TSC2;TMEM131L
protein localization to cell periphery (GO:1990778)	1/118	0.83874	0.864681	-0.363542	0.0639305	TSPAN14
negative regulation of apoptotic signaling pathway (GO:2001234)	1/66	0.639143	0.749414	-0.142305	0.0636993	HERPUD1
regulation of cytokine production (GO:0001817)	1/109	0.814589	0.851792	-0.309878	0.0635473	IRF3
positive regulation of developmental process (GO:0051094)	1/114	0.82842	0.857197	-0.335243	0.0631046	SRSF6
positive regulation of autophagy (GO:0010508)	1/68	0.650137	0.759126	-0.142044	0.06116	TSC2
regulation of gene expression (GO:0010468)	16/1038	0.524457	0.685564	-0.0931314	0.0601063	EIF4A2;SRPK3;HDAC5;HDAC10;YTHDC1;DENND4A;BRAF;MAPK12;ARNTL;CLK1;SBNO2;RBL1;SON;HGS;CPNE1;GABPA
regulation of peptidyl-serine phosphorylation (GO:0033135)	1/87	0.739279	0.806695	-0.196781	0.0594438	BRAF
positive regulation of cysteine-type endopeptidase activity involved in apoptotic process (GO:0043280)	1/110	0.817441	0.851792	-0.293429	0.0591483	HTRA2
negative regulation of response to external stimulus (GO:0032102)	1/108	0.811692	0.851792	-0.259732	0.0541889	PTGIS
regulation of inflammatory response (GO:0050727)	2/167	0.727488	0.797559	-0.168932	0.0537472	SBNO2;PTGIS
response to molecule of bacterial origin (GO:0002237)	1/99	0.783505	0.833516	-0.219633	0.0535855	IRAK1
ubiquitin-dependent protein catabolic process (GO:0006511)	4/342	0.770756	0.8256	-0.202972	0.0528506	BAG6;ARRDC1;PPP2R5C;ARNTL
retrograde vesicle-mediated transport, Golgi to ER (GO:0006890)	1/81	0.713897	0.790708	-0.155189	0.0523014	KIF22
regulation of epithelial cell proliferation (GO:0050678)	1/73	0.676184	0.769015	-0.13314	0.0520963	SRSF6
protein localization to plasma membrane (GO:0072659)	1/131	0.868195	0.885269	-0.365483	0.0516567	TSPAN14
positive regulation of cellular process (GO:0048522)	7/520	0.686264	0.774814	-0.136814	0.0515095	EIF5A;CNOT6;HSF1;HTRA2;NAP1L1;ROMO1;SMC5
negative regulation of multicellular organismal process (GO:0051241)	1/126	0.857561	0.877621	-0.31885	0.0489952	SRSF6
regulation of protein activation cascade (GO:2000257)	1/109	0.814589	0.851792	-0.236023	0.0484016	CFI
regulated exocytosis (GO:0045055)	2/149	0.667847	0.765754	-0.117848	0.0475748	FGA;VCL
regulation of neuron projection development (GO:0010975)	1/120	0.843666	0.867204	-0.278612	0.0473637	KIDINS220
cellular response to molecule of bacterial origin (GO:0071219)	1/85	0.731078	0.798992	-0.147115	0.0460817	SBNO2
protein oligomerization (GO:0051259)	3/218	0.651114	0.759633	-0.107002	0.0459113	DGKD;IRAK1;HSF1
regulation of MAPK cascade (GO:0043408)	2/204	0.821968	0.853676	-0.224315	0.0439777	HGS;INHA
proteasomal protein catabolic process (GO:0010498)	3/238	0.708415	0.789512	-0.12586	0.0433871	BAG6;PPP2R5C;ARNTL
ion transport (GO:0006811)	3/290	0.823451	0.85395	-0.220813	0.0428931	SLC9A5;WNK4;CLCN2
brain development (GO:0007420)	1/120	0.843666	0.867204	-0.24274	0.0412655	BAG6
cellular response to insulin stimulus (GO:0032869)	1/111	0.82025	0.852524	-0.207929	0.0412004	HDAC5
circulatory system development (GO:0072359)	1/110	0.817441	0.851792	-0.189985	0.0382965	TSC2
cell-cell adhesion via plasma-membrane adhesion molecules (GO:0098742)	1/143	0.890599	0.902852	-0.326897	0.0378746	PTPRM
response to lipopolysaccharide (GO:0032496)	2/156	0.692202	0.779633	-0.0965201	0.0355075	SBNO2;IRAK1
regulation of cell motility (GO:2000145)	1/110	0.817441	0.851792	-0.172597	0.0347915	ADGRG3
neuron projection morphogenesis (GO:0048812)	2/164	0.718218	0.793693	-0.102655	0.033977	CPNE1;NRCAM
positive regulation of vasculature development (GO:1904018)	1/105	0.802728	0.84625	-0.136593	0.0300148	PTGIS
central nervous system development (GO:0007417)	2/218	0.849295	0.871071	-0.176598	0.0288472	BAG6;NRCAM
regulation of cellular component organization (GO:0051128)	1/141	0.887148	0.900005	-0.235656	0.0282183	TSC2
cellular response to organic cyclic compound (GO:0071407)	1/136	0.878038	0.893353	-0.212357	0.0276203	SPIDR
positive regulation of protein kinase B signaling (GO:0051897)	1/128	0.861914	0.880788	-0.185641	0.0275863	CPNE1
negative regulation of canonical Wnt signaling pathway (GO:0090090)	1/149	0.900334	0.911401	-0.259179	0.0272111	TMEM131L
cellular response to transforming growth factor beta stimulus (GO:0071560)	1/101	0.790112	0.838186	-0.114953	0.0270807	PTPRK
regulation of humoral immune response (GO:0002920)	1/114	0.82842	0.857197	-0.126138	0.0237436	CFI
positive regulation of peptidyl-serine phosphorylation (GO:0033138)	1/84	0.726881	0.797519	-0.0722594	0.0230502	BRAF
interleukin-1-mediated signaling pathway (GO:0070498)	1/96	0.773204	0.826957	-0.0873121	0.0224577	IRAK1
protein ubiquitination (GO:0016567)	6/507	0.791141	0.838453	-0.0947215	0.0221913	KBTBD3;HERC4;ARRDC1;RNF180;MIB2;DDB2
chloride transport (GO:0006821)	1/74	0.681156	0.771536	-0.0550238	0.0211271	CLCN2
regulation of canonical Wnt signaling pathway (GO:0060828)	2/214	0.841902	0.866664	-0.119046	0.0204868	TMEM131L;ARNTL
receptor-mediated endocytosis (GO:0006898)	1/189	0.946493	0.953302	-0.337008	0.0185327	DNM1
positive regulation of MAPK cascade (GO:0043410)	3/290	0.823451	0.85395	-0.0928301	0.0180323	FGA;IRAK1;BRAF
regulation of mRNA stability (GO:0043488)	1/129	0.86404	0.881674	-0.121639	0.0177758	NUP214
protein stabilization (GO:0050821)	1/153	0.906339	0.915494	-0.17757	0.0174626	BAG6
positive regulation of cell proliferation (GO:0008284)	6/425	0.635346	0.749355	-0.0344875	0.015643	EIF5A;CNOT6;HSF1;CHRD;NAP1L1;ROMO1
positive regulation of protein kinase activity (GO:0045860)	1/173	0.931367	0.939419	-0.193937	0.0137893	MAP4K2
DNA-templated transcription, initiation (GO:0006352)	1/187	0.944801	0.952283	-0.216139	0.0122726	POLRMT
chromatin remodeling (GO:0006338)	1/117	0.83622	0.862717	-0.0627064	0.0112159	HDAC5
response to cytokine (GO:0034097)	1/139	0.883588	0.898347	-0.0751882	0.00930558	IRAK1
positive regulation of MAP kinase activity (GO:0043406)	2/178	0.759295	0.818332	-0.0255996	0.00704921	IRAK1;KIDINS220
regulation of ERK1 and ERK2 cascade (GO:0070372)	2/248	0.895442	0.907105	-0.0592606	0.00654459	FGA;BRAF
cellular response to tumor necrosis factor (GO:0071356)	1/195	0.951265	0.957419	-0.108691	0.00543054	ARHGEF2
regulation of cell growth (GO:0001558)	1/202	0.956298	0.961104	-0.109331	0.00488551	IP6K2
ncRNA processing (GO:0034470)	3/228	0.680714	0.771536	-0.0120463	0.00463316	RPL10;RPL22;TSR1
positive regulation of hydrolase activity (GO:0051345)	2/173	0.745255	0.810689	-0.0119555	0.00351528	DOCK8;MAPK12
RNA splicing (GO:0008380)	1/107	0.80875	0.851316	-0.0134403	0.00285291	SRSF7
cytokine-mediated signaling pathway (GO:0019221)	5/634	0.96752	0.970988	-0.0642293	0.0021208	IRF3;IRAK1;IFI30;IRF9;IP6K2
cellular response to peptide hormone stimulus (GO:0071375)	1/111	0.82025	0.852524	-0.00268671	0.000532361	HDAC5
regulation of immune response (GO:0050776)	1/252	0.979963	0.981365	-0.0202301	0.000409465	ERAP1
transmembrane transport (GO:0055085)	1/379	0.99726	0.99726	-0.0632769	0.000173602	CLCN2
nervous system development (GO:0007399)	3/456	0.971963	0.974748	0.0270629	-0.000769591	NAV3;ADORA1;NRCAM
ion transmembrane transport (GO:0034220)	1/220	0.966988	0.970988	0.0483311	-0.00162246	CLCN2
regulation of cytoskeleton organization (GO:0051493)	1/96	0.773204	0.826957	0.0090848	-0.00233672	RHOBTB3
defense response to bacterium (GO:0042742)	1/242	0.976577	0.978675	0.125977	-0.0029858	ROMO1
regulation of protein processing (GO:0070613)	1/129	0.86404	0.881674	0.0399588	-0.00583942	CFI
peptidyl-threonine modification (GO:0018210)	1/90	0.751115	0.812644	0.0248421	-0.00710974	ULK1
positive regulation of gene expression (GO:0010628)	11/772	0.638085	0.749414	0.0170106	-0.00764258	PPM1A;IRAK1;SFR1;HGS;PYM1;UPF3B;BRAF;MMS19;SLC50A1;GABPA;ARNTL
regulation of nucleic acid-templated transcription (GO:1903506)	4/608	0.984596	0.9853	0.623776	-0.00968317	SBNO2;HDAC10;DENND4A;ARNTL
regulation of immune effector process (GO:0002697)	1/115	0.83106	0.859294	0.0813005	-0.0150449	CFI
negative regulation of cell proliferation (GO:0008285)	5/364	0.65721	0.761413	0.036247	-0.0152147	ZBTB17;HGS;TSC2;PTPRK;PPP2R5C
neuron differentiation (GO:0030182)	1/140	0.885382	0.899517	0.129378	-0.0157499	NRBP2
non-canonical Wnt signaling pathway (GO:0035567)	1/128	0.861914	0.880788	0.11839	-0.0175928	PLCB3
neuron projection development (GO:0031175)	2/168	0.73052	0.798992	0.0580382	-0.0182239	PTPRM;ULK1
protein polyubiquitination (GO:0000209)	3/284	0.812495	0.851792	0.0887489	-0.0184283	RNF180;MIB2;DDB2
regulation of cellular macromolecule biosynthetic process (GO:2000112)	6/632	0.924194	0.932856	0.238557	-0.0188063	SBNO2;RPL10;HDAC10;DENND4A;EHMT2;ARNTL
positive regulation of cell migration (GO:0030335)	2/222	0.856372	0.877045	0.142484	-0.0220922	CAPN7;ARHGEF2
inflammatory response (GO:0006954)	2/253	0.901723	0.911638	0.214237	-0.0221624	HDAC5;ADORA1
positive regulation of protein phosphorylation (GO:0001934)	3/413	0.953606	0.959086	0.476302	-0.0226266	BRAF;ARHGEF2;INHA
regulation of Ras protein signal transduction (GO:0046578)	1/91	0.75494	0.815522	0.0949588	-0.0266945	ARHGEF2
heart development (GO:0007507)	1/150	0.90187	0.911638	0.271929	-0.0280861	TSC2
extracellular matrix organization (GO:0030198)	2/230	0.869626	0.886082	0.205919	-0.0287653	FGA;PXDN
phagocytosis (GO:0006909)	1/136	0.878038	0.893353	0.240268	-0.0312505	ADORA1
positive regulation of multicellular organismal process (GO:0051240)	2/203	0.819855	0.852524	0.188491	-0.0374395	CAPN7;SRSF6
positive regulation of protein serine/threonine kinase activity (GO:0071902)	1/119	0.841222	0.866601	0.223203	-0.0385918	IRAK1
negative regulation of growth (GO:0045926)	1/121	0.846072	0.86904	0.246075	-0.0411316	IP6K2
positive regulation of canonical Wnt signaling pathway (GO:0090263)	1/114	0.82842	0.857197	0.244416	-0.0460077	ARNTL
positive regulation of macromolecule metabolic process (GO:0010604)	3/277	0.798995	0.844858	0.225258	-0.0505481	HGS;BRAF;GABPA
transmembrane receptor protein tyrosine kinase signaling pathway (GO:0007169)	5/397	0.729534	0.798992	0.170578	-0.0537919	TIAL1;HNRNPM;TSC2;DNM1;MAPK12
positive regulation of nucleic acid-templated transcription (GO:1903508)	5/503	0.886556	0.900005	0.589836	-0.0710226	PPM1A;IRAK1;SFR1;MMS19;ARNTL
protein complex assembly (GO:0006461)	2/190	0.79029	0.838186	0.325197	-0.0765369	SEC23IP;IRAK1
positive regulation of intracellular signal transduction (GO:1902533)	6/480	0.746404	0.811309	0.275927	-0.0807054	PPM1A;IRAK1;PLEKHG5;CPNE1;MIB2;WDR24
positive regulation of ERK1 and ERK2 cascade (GO:0070374)	2/202	0.817721	0.851792	0.42822	-0.0861728	FGA;BRAF
regulation of transcription, DNA-templated (GO:0006355)	21/1599	0.797888	0.844326	0.531273	-0.119955	CDT1;HDAC5;ZGPAT;HDAC10;DENND4A;ZC3H8;ARID5B;RFX1;PTPRK;FOXP4;ARNTL;NPAS4;TIAL1;PPM1A;SBNO2;IRAK1;SFR1;TIMELESS;MMS19;FBXO5;GABPA
