# Supplementary material for: ADAR-deficiency perturbs the global splicing landscape in mouse tissues
Source: Genome Res. 2020 Aug;30(8):1107–18. doi: 10.1101/gr.256933.119 (PMC7462079; doi:10.1101/gr.256933.119)
Supplement: Supplemental Material [file supp_gr.256933.119_Supplemental_Table_S4.xlsx]

## Sheet: Legend
Supp. Table 4: Tabulation of DEXSeq events predicted to have significant differential exon/intron usage in more than 1 ADAR1 (Adar) mutant tissue
Column Header	Column Description
Gene Name	Name of the Gene harboring differential exon/intron usage event and editing site
Gene Fragment ID	ID of the gene fragment predicted to have differential exon/intron usage as predicted by DEXSeq; eg. ENSMUSG00000044339:E005:: ENSMUSG00000044339 is Ensembl Gene ID and E005 is the 5th fragment of the gene that has been predicted to have differential exon/intron usage
DEXSeq adj. p-value	Adjusted p-value of DEXSeq event (≤ 0.1 is considered significant) in Tissue 1
Log2FC	Log2 Fold Change::: Values greater (>) than zero means higher usage in WT and less (<0) than zero means higher usage in Mutant > > > Tissue 1
DEXSeq adj. p-value	Adjusted p-value of DEXSeq event (≤ 0.1 is considered significant) in Tissue 2
Log2FC	Log2 Fold Change::: Values greater (>) than zero means higher usage in WT and less (<0) than zero means higher usage in Mutant > > > Tissue 2

## Sheet: Table
		Bone Marrow		||	Liver					Bone Marrow		||	Cortex
Gene Name	Gene Fragment ID	adjusted p-value	log2FC:: >0: Higher in WT <0: Higher in Mutant	||	adjusted p-value	log2FC:: >0: Higher in WT <0: Higher in Mutant		Gene Name	Gene Fragment ID	adjusted p-value	log2FC:: >0: Higher in WT <0: Higher in Mutant	||	adjusted p-value	log2FC:: >0: Higher in WT <0: Higher in Mutant
Cacna2d3	ENSMUSG00000021991:E055	0.000757279	1.07484	||	0.0311237	-2.39419		Acot7	ENSMUSG00000028937:E026	0.0171584	-2.12818	||	0.0946824	-0.354131
Ednra	ENSMUSG00000086451:E029	0.00872329	-0.72751	||	0.00579923	-1.26057		Atg4b	ENSMUSG00000026280:E037	0.054098	-2.7592	||	8.53216e-08	-1.85078
Fgd1	ENSMUSG00000025265:E020	0.0545804	-1.56079	||	0.0816063	-13.2342		Atp5b	ENSMUSG00000025393:E010	0.0305811	10.8559	||	0.010105	-1.31611
Ncor1	ENSMUSG00000042298:E027	0.0282905	0.420545	||	0.0911958	0.281154		Fn3k	ENSMUSG00000025175:E004	0.0597821	10.8708	||	0.0414115	-0.906196
Serpine3	ENSMUSG00000091155:E013	0.0869511	0.576691	||	0.00754138	0.920788		Mtmr14	ENSMUSG00000030269:E047	0.0777567	1.06132	||	0.0769588	0.902465
Slc6a20b	ENSMUSG00000025243:E027	0.069106	-0.966975	||	0.00224844	-3.13649		Nostrin	ENSMUSG00000034738:E006	0.025769	-1.78959	||	0.080185	-3.1791
Snhg14	ENSMUSG00000100826:E007	0.0696778	-1.31591	||	0.0206404	-1.96216		Pigl	ENSMUSG00000014245:E005	0.0268876	2.53353	||	0.0268876	2.53353
Snhg14	ENSMUSG00000100826:E006	0.094498	-0.775288	||	0.0692142	-1.00789		Rpain	ENSMUSG00000018449:E028	0.0457146	-1.33351	||	0.071162	1.04603
Ttc19	ENSMUSG00000042298:E018	0.000779434	-1.30688	||	0.0378643	-1.31849		Scaf11	ENSMUSG00000033228:E028	0.0898821	1.76186	||	0.0288328	-1.5322
								Tmcc22	ENSMUSG00000042066:E006	0.0207813	2.08602	||	0.00543098	-1.03823
		Cortex		||	Liver			Sema4d	ENSMUSG00000021451:E002	0.0198834	-3.85038	||	0.0902068	-0.401783
Gene Name	Gene Fragment ID	adjusted p-value	log2FC:: >0: Higher in WT <0: Higher in Mutant	||	adjusted p-value	log2FC:: >0: Higher in WT <0: Higher in Mutant		Slc22a14	ENSMUSG00000070280:E034	0.0872327	-1.00502	||	0.000799257	-0.519101
Egfr	ENSMUSG00000020122:E046	0.0946824	-15.7905	||	0.0141496	-2.64993		Spata13	ENSMUSG00000021990:E010	0.0978427	1.97436	||	0.0935093	0.986897
Gm2115	ENSMUSG00000097789:E002	0.0275272	-1.21676	||	0.0477479	1.59098		Tmem123	ENSMUSG00000050912:E006	0.094993	-1.23975	||	0.0018832	-2.17996
Has3	ENSMUSG00000031910:E007	0.00295263	1.36176	||	0.0911958	-3.87483		Ulk4	ENSMUSG00000040936:E010	0.0255678	0.882516	||	0.00648638	0.83259
B3galnt1	ENSMUSG00000043300:E004	0.0975354	-0.837778	||	0.000402532	0.424316		Umad1	ENSMUSG00000089862:E014	0.0371303	-1.32976	||	0.072977	1.0124
Rps3a1	ENSMUSG00000028081:E003	2.87568e-25	4.43431	||	5.46834e-05	5.21488		Usp40	ENSMUSG00000005501:E018	0.000454842	2.50696	||	0.0642499	1.64961
Rps3a1	ENSMUSG00000028081:E001	1.73385e-21	4.00716	||	0.00208009	4.5497		Zfp426	ENSMUSG00000097469:E003	0.054098	-0.11098	||	0.065777	-0.70397
