# Supplementary material for: ADAR-deficiency perturbs the global splicing landscape in mouse tissues
Source: Genome Res. 2020 Aug;30(8):1107–18. doi: 10.1101/gr.256933.119 (PMC7462079; doi:10.1101/gr.256933.119)
Supplement: Supplemental Material [file supp_gr.256933.119_Supplemental_Table_S5.xlsx]

## Sheet: Legend
Supp. Table 5: Evaluation of Splice Site Strength using MaxEntScan
Column Header	Description
ES Position	Chromosomal Coordinate of the Editing Site		9bp - 5' Splice Site				23bp - 3' Splice Site
Splice Site Region (Strand)	Chromosomal Coordinates of the Splice Site
Relative ES Position	Position of the Editing Site in the respective 9bp or 23bp splice site sequence > > >		Relative ES Position				Relative ES Position
Native Splice Site Sequence	Splice Site Sequence in Unedited State
MaxEntScan Score Native SS (A)	MaxEntScan score od Splice Site Sequence in Unedited State		0	N	Exon		0	N	Intron
Edited Splice Site Sequence	Splice Site Sequence in Edited State		1	N			1	N
MaxEntScan Score Edited SS (G)	MaxEntScan score od Splice Site Sequence in Edited State		2	N			2	N
G-A	Difference of MaxEntScore between Edited and Unedited Splice Site Sequence		3	G	Splice Site		3	N
			4	T			4	N
			5	N	Intron		5	N
			6	N			6	N
			7	N			7	N
			8	N			8	N
							9	N
							10	N
							11	N
							12	N
							13	N
							14	N
							15	N
							16	N
							17	N
							18	A	Splice Site
							19	G
							20	N
							21	N	Exon
							22	N

## Sheet: 5' SS Sequence
MaxEnt Score- 5' splice site
NNNGTNNNN
ES Position	Splice Site Region (Strand)	Relative ES Position	Native Splice Site Sequence	MaxEntScan Score Native SS (A)	Edited Splice Site Sequence	MaxEntScan Score Edited SS (G)	G-A
chr10:33989255	chr10:33989251:33989260(-)	5	TCTGTATAA	-9.29	TCTGTGTAA	-16.22	-6.93
chr8:72251873	chr8:72251866:72251875(+)	6	GCCGTGAGT	8.56	GCCGTGGGT	1.94	-6.62
chr2:39008347	chr2:39008341:39008350(+)	5	GCAATATCC	-13.3	GCAATGTCC	-19.54	-6.24
chr5:21895985	chr5:21895982:21895991(-)	6	CCTGTGAGT	7.21	CCTGTGGGT	1.37	-5.84
chr1:160326426	chr1:160326418:160326427(-)	1	CAGGCTGGC	-2.23	CGGGCTGGC	-7.59	-5.36
chr10:62998835	chr10:62998833:62998842(+)	1	CAGGCTGGC	-2.23	CGGGCTGGC	-7.59	-5.36
chr4:129846543	chr4:129846536:129846545(+)	6	ACAGTGAGT	8.34	ACAGTGGGT	2.99	-5.35
chr19:5090086	chr19:5090079:5090088(+)	6	CCAGTGAGT	8.28	CCAGTGGGT	3.07	-5.21
chr12:32967747	chr12:32967740:32967749(+)	6	ATCGTAAGT	10.44	ATCGTAGGT	5.3	-5.14
chr11:97644856	chr11:97644852:97644861(-)	5	CTGGAACTA	-5.09	CTGGAGCTA	-10.15	-5.06
chr4:155856267	chr4:155856260:155856269(+)	6	TTGGTGAGT	9.27	TTGGTGGGT	4.3	-4.97
chr7:45156058	chr7:45156052:45156061(+)	5	GAGGTAATG	8.73	GAGGTGATG	4.44	-4.29
chr7:45156059	chr7:45156052:45156061(+)	6	GAGGTAATG	8.73	GAGGTAGTG	4.58	-4.15
chr8:84536462	chr8:84536455:84536464(+)	6	ATGGTAACT	6.06	ATGGTAGCT	2.12	-3.94
chr4:109017700	chr4:109017693:109017702(+)	6	CTGGTGAGT	10.1	CTGGTGGGT	6.29	-3.81
chr4:116685664	chr4:116685657:116685666(+)	6	CTGGTGAGT	10.1	CTGGTGGGT	6.29	-3.81
chr11:67197513	chr11:67197511:67197520(+)	1	CAATCACCT	-13.76	CGATCACCT	-17.39	-3.63
chr9:95474417	chr9:95474414:95474423(-)	6	AAAGTAAGA	6.91	AAAGTAGGA	3.63	-3.28
chr14:7936053	chr14:7936046:7936055(+)	6	CAGGTGAGG	10.07	CAGGTGGGG	6.92	-3.15
chr19:41218166	chr19:41218163:41218172(-)	6	GTGGTAAGT	10.36	GTGGTAGGT	7.23	-3.13
chr3:90605156	chr3:90605149:90605158(+)	6	GGGGTAAGT	9.65	GGGGTAGGT	6.59	-3.06
chr7:25013587	chr7:25013579:25013588(-)	1	GAGGTGAGG	8.41	GGGGTGAGG	5.5	-2.91
chr2:5898054	chr2:5898050:5898059(-)	5	CCTCTACCT	-8.46	CCTCTGCCT	-11.35	-2.89
chr9:111025176	chr9:111025169:111025178(+)	6	AAAGTAAGT	9.72	AAAGTAGGT	6.84	-2.88
chr3:80692286	chr3:80692278:80692287(-)	1	AAGGTGGGT	8.23	AGGGTGGGT	5.37	-2.86
chr9:4456006	chr9:4455998:4456007(-)	1	AAGGTGGGT	8.23	AGGGTGGGT	5.37	-2.86
chrX:41654252	chrX:41654250:41654259(+)	1	AAGGTGGGT	8.23	AGGGTGGGT	5.37	-2.86
chr8:84536461	chr8:84536455:84536464(+)	5	ATGGTAACT	6.06	ATGGTGACT	3.33	-2.73
chr2:25059697	chr2:25059691:25059700(+)	5	ACAGTAGGT	5.67	ACAGTGGGT	2.99	-2.68
chr2:147075030	chr2:147075023:147075032(+)	6	CAGGTAATA	8.55	CAGGTAGTA	5.89	-2.66
chr4:44036828	chr4:44036819:44036828(-)	0	AAACTTGAT	-14.09	GAACTTGAT	-16.75	-2.66
chr2:147027649	chr2:147027642:147027651(+)	6	ATGGTAAGT	11.01	ATGGTAGGT	8.6	-2.41
chr17:33687229	chr17:33687221:33687230(-)	1	AAGGTGTGT	6.64	AGGGTGTGT	4.51	-2.13
chr1:17168528	chr1:17168522:17168531(+)	5	AGAGTAAGC	6.31	AGAGTGAGC	4.22	-2.09
chr7:3496672	chr7:3496668:3496677(-)	5	TAGGTAAGG	9.31	TAGGTGAGG	7.65	-1.66
chr13:63300555	chr13:63300554:63300563(+)	0	ACCATGACC	-10.54	GCCATGACC	-12.15	-1.61
chr14:7936048	chr14:7936046:7936055(+)	1	CAGGTGAGG	10.07	CGGGTGAGG	8.48	-1.59
chrX:74226862	chrX:74226854:74226863(-)	1	CAGGTGAGG	10.07	CGGGTGAGG	8.48	-1.59
chr1:93360815	chr1:93360809:93360818(+)	5	TGGGTAAGT	10.24	TGGGTGAGT	8.73	-1.51
chr15:85463210	chr15:85463209:85463218(+)	0	AAAGACTGG	-15.16	GAAGACTGG	-16.49	-1.33
chr1:17168523	chr1:17168522:17168531(+)	0	AGAGTAAGC	6.31	GGAGTAAGC	5.07	-1.24
chr4:138308332	chr4:138308326:138308335(+)	5	TTGGTAAGT	10.47	TTGGTGAGT	9.27	-1.2
chr7:120928508	chr7:120928507:120928516(+)	0	AAGGTACCT	8.49	GAGGTACCT	7.63	-0.86
chr3:84977651	chr3:84977642:84977651(+)	8	AAAAACAGA	-18.63	AAAAACAGG	-19.47	-0.84
chr13:54762639	chr13:54762636:54762645(-)	6	AAGGCAAGT	3.24	AAGGCAGGT	2.53	-0.71
chr13:106996744	chr13:106996740:106996749(-)	5	ACTGTAAGT	8.59	ACTGTGAGT	7.94	-0.65
chr13:24670090	chr13:24670083:24670092(+)	6	CAGGCAAGT	3.1	CAGGCAGGT	2.53	-0.57
chr8:64779694	chr8:64779691:64779700(-)	6	CAGGCAAGT	3.1	CAGGCAGGT	2.53	-0.57
chr15:38492245	chr15:38492237:38492246(-)	1	AAGGCAAGT	3.24	AGGGCAAGT	2.7	-0.54
chr13:29023215	chr13:29023209:29023218(+)	5	CAGGTAAGC	9.88	CAGGTGAGC	9.6	-0.28
chr1:97895963	chr1:97895962:97895971(-)	8	TAGGTAAGA	9.14	TAGGTAAGG	9.31	0.17
chr5:45522508	chr5:45522499:45522508(+)	8	CTGGTAAGA	9.45	CTGGTAAGG	9.68	0.23
chr2:3461113	chr2:3461108:3461117(+)	4	GCCAATTTT	-32.57	GCCAGTTTT	-32.03	0.54
chr11:97644857	chr11:97644852:97644861(-)	4	CTGGAACTA	-5.09	CTGGGACTA	-4.55	0.54
chr11:97644853	chr11:97644852:97644861(-)	8	CTGGAACTA	-5.09	CTGGAACTG	-3.77	1.32
chr5:143392158	chr5:143392149:143392158(+)	8	CCCAGGCTA	-25.53	CCCAGGCTG	-24.11	1.42
chr10:33989252	chr10:33989251:33989260(-)	8	TCTGTATAA	-9.29	TCTGTATAG	-7.72	1.57
chr17:47603850	chr17:47603849:47603858(-)	8	CAGGTATCA	7.33	CAGGTATCG	9.18	1.85
chr18:40218746	chr18:40218739:40218748(-)	2	CAAGTAACT	4.45	CAGGTAACT	8.63	4.18
chrY:914183	chrY:914180:914189(+)	2	GCAGTAAGA	4.95	GCGGTAAGA	9.63	4.68
chr4:40850143	chr4:40850137:40850146(-)	3	TGTAGACCC	-21.06	TGTGGACCC	-12.88	8.18
chr12:109715651	chr12:109715647:109715656(+)	3	ATAAGGACG	-22.54	ATAGGGACG	-14.36	8.18
chr2:39008345	chr2:39008341:39008350(+)	3	GCAATATCC	-13.3	GCAGTATCC	-5.12	8.18
chr3:4339117	chr3:4339113:4339122(+)	3	GCTAGCTGC	-25.35	GCTGGCTGC	-17.17	8.18
chr12:84922999	chr12:84922997:84923006(-)	7	TCTGTATAG	-7.72	TCTGTATGG	0.56	8.28
chr8:25594719	chr8:25594712:25594721(-)	2	GCAGTCAGA	-6.75	GCGGTCAGA	3.34	10.09
chr8:71373689	chr8:71373686:71373695(+)	2	CCAGGCTGG	-17.05	CCGGGCTGG	-5.6	11.45
chr11:59458473	chr11:59458470:59458479(+)	2	ACACCTGTA	-35.33	ACGCCTGTA	-21.53	13.8

## Sheet: 3' SS Sequence
MaxEnt Score- 3' splice site
NNNNNNNNNNNNNNNNNNAGNNN
ES Position	Splice Site Region (Strand)	Relative ES Position	Native Splice Site Sequence	MaxEntScan Score Native SS (A)	Edited Splice Site Sequence	MaxEntScan Score Edited SS (G)	G-A
chr12:109723778	chr12:109723760:109723783(+)	17	TCGAGTTGTTCTTTGATATTTAA	-18.27	TCGAGTTGTTCTTTGATGTTTAA	-30.9	-12.63
chr5:44517716	chr5:44517710:44517733(-)	17	CCCTAAGTGCTACGATCAAAGGC	-10.35	CCCTAAGTGCTACGATCGAAGGC	-22.22	-11.87
chr9:20894972	chr9:20894966:20894989(-)	17	CCCCTGCCCTGCCCACAAAGCTG	5.46	CCCCTGCCCTGCCCACAGAGCTG	-6.08	-11.54
chr11:120611180	chr11:120611175:120611198(-)	18	TGACCTTGCTCCCTTTCCAGGTG	12.71	TGACCTTGCTCCCTTTCCGGGTG	4.75	-7.96
chrX:10697366	chrX:10697361:10697384(-)	18	AAATCTGTAGTCCTTGCAACATG	-10.34	AAATCTGTAGTCCTTGCAGCATG	-18.3	-7.96
chr2:5021230	chr2:5021225:5021248(-)	18	ACACACTGTACCCCTCCTAGGGA	6.55	ACACACTGTACCCCTCCTGGGGA	-1.41	-7.96
chr3:32561463	chr3:32561444:32561467(+)	18	ATGGCTTGGGCCCCTCGCAGGAG	4.72	ATGGCTTGGGCCCCTCGCGGGAG	-3.24	-7.96
chr4:155905606	chr4:155905587:155905610(+)	18	CCCACCCCACCCCACCCCAGCCA	3.92	CCCACCCCACCCCACCCCGGCCA	-4.04	-7.96
chr17:35185312	chr17:35185307:35185330(-)	18	ATCATCCTCTGCACTGCCAGGCC	6.17	ATCATCCTCTGCACTGCCGGGCC	-1.78	-7.95
chr19:4388554	chr19:4388549:4388572(-)	18	ACCCGACTGCTCTTCCAAAGGTC	7.48	ACCCGACTGCTCTTCCAAGGGTC	-0.47	-7.95
chr2:91936773	chr2:91936768:91936791(-)	18	CTTTGCTTCTGTCTCAGCAGGAG	8.56	CTTTGCTTCTGTCTCAGCGGGAG	0.61	-7.95
chr7:12866569	chr7:12866564:12866587(-)	18	GAGCACTTGCTTTTTCATAGGAC	6.15	GAGCACTTGCTTTTTCATGGGAC	-1.8	-7.95
chr15:7185065	chr15:7185046:7185069(+)	18	TACTTGATTTGTGTTTACAGAAG	6.39	TACTTGATTTGTGTTTACGGAAG	-1.56	-7.95
chr17:32336205	chr17:32336200:32336223(-)	18	ACTCCTCCTTTCACTTCCAGACC	11.43	ACTCCTCCTTTCACTTCCGGACC	3.48	-7.95
chr5:48928236	chr5:48928231:48928254(-)	18	ATCCCATTATGTAAATGTAGCAC	2.28	ATCCCATTATGTAAATGTGGCAC	-5.67	-7.95
chr5:23790699	chr5:23790681:23790704(+)	17	TGAGTTCAAATCCCAGCAACCAC	-15.17	TGAGTTCAAATCCCAGCGACCAC	-21	-5.83
chr3:88722513	chr3:88722499:88722522(+)	13	GTCTACAAAGTGAATTCCAGGAC	-0.39	GTCTACAAAGTGAGTTCCAGGAC	-5.81	-5.42
chr5:48928241	chr5:48928231:48928254(-)	13	ATCCCATTATGTAAATGTAGCAC	2.28	ATCCCATTATGTAGATGTAGCAC	-2.77	-5.05
chr5:23790691	chr5:23790681:23790704(+)	9	TGAGTTCAAATCCCAGCAACCAC	-15.17	TGAGTTCAAGTCCCAGCAACCAC	-20.11	-4.94
chr5:123522698	chr5:123522692:123522715(-)	17	TCATATAAATTAAAAGTATGAAC	-17.05	TCATATAAATTAAAAGTGTGAAC	-21.9	-4.85
chr13:106996761	chr13:106996753:106996776(-)	15	GAACCATTGTTGGGAATTGGACT	-6.96	GAACCATTGTTGGGAGTTGGACT	-11.46	-4.5
chr5:23790690	chr5:23790681:23790704(+)	8	TGAGTTCAAATCCCAGCAACCAC	-15.17	TGAGTTCAGATCCCAGCAACCAC	-19.23	-4.06
chr5:48928240	chr5:48928231:48928254(-)	14	ATCCCATTATGTAAATGTAGCAC	2.28	ATCCCATTATGTAAGTGTAGCAC	-1.62	-3.9
chr11:43684139	chr11:43684124:43684147(+)	14	AGAGAGACACTCTAATGTGTATG	-17.43	AGAGAGACACTCTAGTGTGTATG	-20.97	-3.54
chr2:103456961	chr2:103456954:103456977(-)	16	GCTCTCTTGTTGCTGAACAGGTG	8.7	GCTCTCTTGTTGCTGAGCAGGTG	6.01	-2.69
chr6:80319177	chr6:80319171:80319194(+)	5	CATCAATGGGAGGAGAGGCCTTT	-46.38	CATCAGTGGGAGGAGAGGCCTTT	-47.79	-1.41
chr7:127813523	chr7:127813504:127813527(-)	4	TCGAACTCAGAAATCTGCCTGCC	-17.6	TCGAGCTCAGAAATCTGCCTGCC	-18.7	-1.1
chr13:64366645	chr13:64366638:64366661(-)	16	CTCCCCCTTAACTTTCAAAGGAC	6.46	CTCCCCCTTAACTTTCGAAGGAC	5.77	-0.69
chr10:77322603	chr10:77322580:77322603(-)	0	ACTCTTTCTGGGCACCACAGGTT	5.45	GCTCTTTCTGGGCACCACAGGTT	4.89	-0.56
chr4:95093490	chr4:95093489:95093512(+)	0	AGAGAATTGGGCCATCAGGAAGA	-34.07	GGAGAATTGGGCCATCAGGAAGA	-34.5	-0.43
chr5:48928242	chr5:48928231:48928254(-)	12	ATCCCATTATGTAAATGTAGCAC	2.28	ATCCCATTATGTGAATGTAGCAC	1.85	-0.43
chr9:20894975	chr9:20894966:20894989(-)	14	CCCCTGCCCTGCCCACAAAGCTG	5.46	CCCCTGCCCTGCCCGCAAAGCTG	5.04	-0.42
chr5:23790689	chr5:23790681:23790704(+)	7	TGAGTTCAAATCCCAGCAACCAC	-15.17	TGAGTTCGAATCCCAGCAACCAC	-15.58	-0.41
chr3:32561445	chr3:32561444:32561467(+)	0	ATGGCTTGGGCCCCTCGCAGGAG	4.72	GTGGCTTGGGCCCCTCGCAGGAG	4.5	-0.22
chr12:109715651	chr12:109715650:109715673(+)	0	AGGACGTGCCAGCATCGTGACTG	-20.05	GGGACGTGCCAGCATCGTGACTG	-20.15	-0.1
chr1:17168399	chr1:17168382:17168405(+)	16	CCATCTCTGGGCTGGTAGTCTTG	-25.92	CCATCTCTGGGCTGGTGGTCTTG	-25.96	-0.04
chr4:116552357	chr4:116552341:116552364(-)	7	TACAGATATCCACCTGCCTTTGC	-14.93	TACAGATGTCCACCTGCCTTTGC	-14.92	0.01
chr5:48928249	chr5:48928231:48928254(-)	5	ATCCCATTATGTAAATGTAGCAC	2.28	ATCCCGTTATGTAAATGTAGCAC	2.33	0.05
chr5:48928254	chr5:48928231:48928254(-)	0	ATCCCATTATGTAAATGTAGCAC	2.28	GTCCCATTATGTAAATGTAGCAC	2.44	0.16
chr5:65696941	chr5:65696934:65696957(-)	16	TTTGATTTTCTGACCGATAGAGG	4.4	TTTGATTTTCTGACCGGTAGAGG	4.58	0.18
chr3:88722504	chr3:88722499:88722522(+)	4	GTCTACAAAGTGAATTCCAGGAC	-0.39	GTCTGCAAAGTGAATTCCAGGAC	-0.03	0.36
chr11:97644574	chr11:97644554:97644577(-)	3	CTGAGTTTGAGGCCAGCCTGGTC	-15.01	CTGGGTTTGAGGCCAGCCTGGTC	-14.42	0.59
chr3:58590695	chr3:58590674:58590697(+)	20	TTTTTTTCTATCTGTTTCAGACA	11.04	TTTTTTTCTATCTGTTTCAGGCA	11.64	0.6
chr5:49086788	chr5:49086767:49086790(-)	2	TTAGATTTTTTTCTTTATTTACA	-10.24	TTGGATTTTTTTCTTTATTTACA	-9.52	0.72
chr8:25745597	chr8:25745577:25745600(-)	3	CGTAATGAGATCTGACGCCCTCT	-19.43	CGTGATGAGATCTGACGCCCTCT	-18.69	0.74
chr8:9711101	chr8:9711083:9711106(-)	5	TCCTGACCCTGGCATTCCCCTGT	-12.52	TCCTGGCCCTGGCATTCCCCTGT	-11.7	0.82
chr2:5021239	chr2:5021225:5021248(-)	9	ACACACTGTACCCCTCCTAGGGA	6.55	ACACACTGTGCCCCTCCTAGGGA	7.44	0.89
chr16:32888120	chr16:32888109:32888132(+)	10	CACCTGACTTACTCTTGCAGAGA	8.68	CACCTGACTTGCTCTTGCAGAGA	9.66	0.98
chr5:48928246	chr5:48928231:48928254(-)	8	ATCCCATTATGTAAATGTAGCAC	2.28	ATCCCATTGTGTAAATGTAGCAC	3.39	1.11
chr11:43684145	chr11:43684124:43684147(+)	20	AGAGAGACACTCTAATGTGTATG	-17.43	AGAGAGACACTCTAATGTGTGTG	-16.3	1.13
chr8:9711093	chr8:9711083:9711106(-)	13	TCCTGACCCTGGCATTCCCCTGT	-12.52	TCCTGACCCTGGCGTTCCCCTGT	-11.35	1.17
chr2:5897556	chr2:5897537:5897560(-)	4	ACTCAGAGATCCCCCTGCCTCTG	-14.21	ACTCGGAGATCCCCCTGCCTCTG	-12.83	1.38
chr4:95093510	chr4:95093489:95093512(+)	20	AGAGAATTGGGCCATCAGGAAGA	-34.07	AGAGAATTGGGCCATCAGGAGGA	-32.36	1.71
chr1:160325350	chr1:160325349:160325372(-)	22	CCAGTTCTCAGGAGGCAGAGGCA	-23.81	CCAGTTCTCAGGAGGCAGAGGCG	-22.04	1.77
chr7:122313059	chr7:122313043:122313066(+)	15	TGGGCTTTCAGAGTCAGCCCTTG	-26.87	TGGGCTTTCAGAGTCGGCCCTTG	-24.68	2.19
chr4:40850143	chr4:40850135:40850158(-)	15	TATGCCATGGTGTGTAGACCCAT	-18.36	TATGCCATGGTGTGTGGACCCAT	-16.09	2.27
chr13:63300712	chr13:63300691:63300714(+)	20	CGGCGATGACCTCTCTAACAAGG	-16.72	CGGCGATGACCTCTCTAACAGGG	-14.34	2.38
chr2:5897554	chr2:5897537:5897560(-)	6	ACTCAGAGATCCCCCTGCCTCTG	-14.21	ACTCAGGGATCCCCCTGCCTCTG	-11.81	2.4
chr1:63117112	chr1:63117097:63117120(+)	14	GTCCTGGACTTCTTAAAGGCGAG	-25.22	GTCCTGGACTTCTTGAAGGCGAG	-21.77	3.45
chr8:25745593	chr8:25745577:25745600(-)	7	CGTAATGAGATCTGACGCCCTCT	-19.43	CGTAATGGGATCTGACGCCCTCT	-15.58	3.85
chr6:87986177	chr6:87986170:87986193(+)	6	CTCTGTAGATCAGGCTGGCCTCG	-38.71	CTCTGTGGATCAGGCTGGCCTCG	-34.66	4.05
chr3:90011216	chr3:90011207:90011230(-)	14	AAAATGCTGGGATTATGGGGAGT	-24.76	AAAATGCTGGGATTGTGGGGAGT	-20.49	4.27
chr12:40209686	chr12:40209670:40209693(-)	7	AGCCAGTAGAGGAATGTAAGATT	-18.06	AGCCAGTGGAGGAATGTAAGATT	-13.62	4.44
chr1:160325363	chr1:160325349:160325372(-)	9	CCAGTTCTCAGGAGGCAGAGGCA	-23.81	CCAGTTCTCGGGAGGCAGAGGCA	-17.83	5.98
chr6:87986182	chr6:87986170:87986193(+)	11	CTCTGTAGATCAGGCTGGCCTCG	-38.71	CTCTGTAGATCGGGCTGGCCTCG	-31.9	6.81
chr12:109563691	chr12:109563671:109563694(+)	19	ACAGCCTAACCTTGTCAGAAGCC	-14.55	ACAGCCTAACCTTGTCAGAGGCC	-5.8	8.75
