# Supplementary material for: ADAR-deficiency perturbs the global splicing landscape in mouse tissues
Source: Genome Res. 2020 Aug;30(8):1107–18. doi: 10.1101/gr.256933.119 (PMC7462079; doi:10.1101/gr.256933.119)
Supplement: Supplemental Material [file supp_gr.256933.119_Supplemental_Table_S6.xlsx]

## Sheet: Legend
	Supp. Table 6: Overlay of circRNAs predicted by DCC with differential exon/intron usage events predicted by DEXSeq in ADAR1 (Adar) mutant Bone Marrow and Liver
	Column Header	Column Description
	Gene Name	Name of the Gene harboring differential exon/intron usage event and also a circRNA event
DEXSeq Coordinates	Chr	Chromosome harboring the gene with DEXSeq event
	Start	Start location of DEXSeq event
	Stop	End location of DEXSeq event
CircRNA Coordinates	Chr	Chromosome harboring the gene with circRNA
	Start	Start location of circRNA event
	Stop	End location of circRNA event
	Strand	Strand harboring the DEXSeq and circRNA event
	Type	Annotation of circRNA as exon-exon, exon-intron or exon-exon
	Genomic Distance of circRNA to Splice Event	Distance between coordinates of DEXSeq event and circRNA coordinate; 0 means same coodinates are involved in DEXSeq and circRNA event
	Note: Bone Marrow and Liver intersects are on different tabs

## Sheet: Bone Marrow
	DexSeq Coordinates			CircRNA Coordinates
Gene	Chr	Start	Stop	Chr	Start	Stop	Strand	Type	Genomic Distance of Circle to Splice Events	Notes
Dock2	11	34756283	34783780	11	34501170	34503414	-	exon-exon	-252870	Negative distance means circle has smaller coordinates than splicing event
Med12l	3	59256007	59257041	3	59031546	59042413	+	exon-exon	-213595
Arid1b	17	5291284	5305748	17	5040580	5127024	+	exon-exon	-164261
Arid1b	17	5291284	5305748	17	5097574	5127024	+	exon-exon	-164261
Prkag2	5	25028537	25100010	5	24866079	24871659	-	exon-exon	-156879
Fryl	5	73221073	73256399	5	73069883	73072921	-	exon-exon	-148153
Foxp1	6	99163030	99234793	6	99003200	99016665	-	exon-exon	-146366
Vps13b	15	35929855	35931228	15	35792039	35794489	+	exon-exon	-135367
Vps13b	15	35926291	35929854	15	35792039	35794489	+	exon-exon	-131803
Fryl	5	73195114	73210108	5	73069883	73072921	-	exon-exon	-122194
Dym	18	75243399	75286619	18	75080203	75126919	+	exon-exon	-116481
Dym	18	75243399	75286619	18	75114790	75126919	+	exon-exon	-116481
Vps13b	15	35910950	35914773	15	35792039	35794489	+	exon-exon	-116462
Vps13b	15	35887383	35905271	15	35792039	35794489	+	exon-exon	-92895
Cacna1e	1	154816942	154882165	1	154700371	154725920	-	exon-exon	-91023
Ttc7b	12	100466311	100495271	12	100373544	100376248	-	exon-exon	-90064
Sgms1	19	32248037	32259975	19	32159524	32160363	-	exon-exon	-87675
Nbas	12	13566258	13583390	12	13469841	13484044	+	exon-exon	-82215
Nbas	12	13566258	13583390	12	13482386	13484044	+	exon-exon	-82215
Hk1	10	62365069	62374703	10	62284279	62286652	-	exon-exon	-78418
Ttll5	12	85956721	85996000	12	85863564	85879475	+	exon-exon	-77247
Hk1	10	62353106	62358335	10	62284279	62286652	-	exon-exon	-66455
Rere	4	150576289	150610853	4	150468695	150510038	+	exon-exon	-66252
Rere	4	150576289	150610853	4	150500003	150510038	+	exon-exon	-66252
Btrc	19	45527457	45528972	19	45456533	45471104	+	exon-exon	-56354
Hk1	10	62342723	62353057	10	62284279	62286652	-	exon-exon	-56072
Lonp2	8	86716633	86722492	8	86665691	86673069	+	exon-exon	-43565
Fam208a	14	27472547	27475694	14	27438599	27442620	+	exon-exon	-29928
Nsd2	5	33895713	33897966	5	33843112	33868878	+	exon-exon	-26836
Acvr2a	2	48900249	48903269	2	48870289	48873473	+	exon-exon	-26777
Rere	4	150534946	150569587	4	150468695	150510038	+	exon-exon	-24909
Rere	4	150534946	150569587	4	150500003	150510038	+	exon-exon	-24909
Mbnl1	3	60626796	60627147	3	60595594	60603894	+	exon-exon	-22903
Acbd5	2	23112505	23114508	2	23089591	23090582	+	exon-exon	-21924
Cep85l	10	53319720	53348471	10	53291764	53298205	-	exon-exon	-21516
Rabgap1	2	37495758	37502867	2	37469377	37475466	+	exon-exon	-20293
Nostrin	2	69185549	69188996	2	69158769	69166007	+	exon-exon	-19543
Ncor1	11	62457807	62458454	11	62433563	62438515	-	exon-exon	-19293
Iqgap2	13	95689792	95707877	13	95661587	95673756	-	exon-exon	-16037
Nostrin	2	69180920	69182826	2	69158769	69166007	+	exon-exon	-14914
Flna	X	74243166	74246063	X	74227665	74228828	-	exon-exon	-14339
Foxp1	6	99028943	99044325	6	99003200	99016665	-	exon-exon	-12279
Cyp4f18	8	72009044	72009242	8	71992832	71998295	-	exon-exon	-10750
Akap7	10	25299165	25307784	10	25283893	25289730	-	exon-exon	-9436
P2rx4	5	122728586	122729044	5	122714399	122719226	+	exon-exon	-9361
P2rx4	5	122728586	122729044	5	122718313	122719226	+	exon-exon	-9361
Iqgap2	13	95683053	95684853	13	95661587	95673756	-	exon-exon	-9298
Iqgap2	13	95682324	95682909	13	95661587	95673756	-	exon-exon	-8569
Fam117a	11	95380662	95381872	11	95363999	95375763	+	exon-exon	-4900
Cyp4f18	8	72002533	72009043	8	71992832	71998295	-	exon-exon	-4239
Nsd2	5	33872503	33877282	5	33843112	33868878	+	exon-exon	-3626
Gclc	9	77781368	77785333	9	77775079	77779635	+	exon-exon	-1734
Iqgap2	13	95675398	95682152	13	95661587	95673756	-	exon-exon	-1643
Dcun1d1	3	35921189	35928509	3	35916220	35921187	-	exon-exon	-3
Prim2	1	33533364	33613757	1	33480458	33533363	-	exon-exon	-2
Prim2	1	33533364	33613757	1	33512016	33533363	-	exon-exon	-2
Prim2	1	33630434	33662245	1	33628395	33630433	-	exon-exon	-2
Scaf11	15	96446592	96460601	15	96431781	96446591	-	exon-exon	-2
Fech	18	64483458	64488900	18	64470682	64483457	-	exon-exon	-2
Nostrin	2	69166008	69175506	2	69158769	69166007	+	exon-exon	-2
Zcchc7	4	44895990	44907201	4	44893533	44895989	+	exon-exon	-2
Slc10a7	8	78578758	78662986	8	78515586	78578757	+	exon-exon	-2
Lonp2	8	86673070	86708932	8	86665691	86673069	+	exon-exon	-2
Bckdhb	9	84012620	84035839	9	83988776	84012619	+	exon-exon	-2
Tgfbr2	9	116131714	116158270	9	116129816	116131713	-	exon-exon	-2
Hivep2	10	14004827	14066582	10	14004201	14066684	+	exon-exon	0	Zero distance means circle overlaps with splicing event
Ikzf1	11	11686469	11700204	11	11699334	11707904	+	intron-exon	0
Iqgap2	13	95671438	95672984	13	95661587	95673756	-	exon-exon	0
Spata1	3	146476303	146481127	3	146463185	146493843	-	exon-exon	0
P2rx4	5	122714547	122718312	5	122714399	122719226	+	exon-exon	0
Foxp1	6	99007379	99009903	6	99003200	99010057	-	exon-exon	0
Foxp1	6	99007379	99009903	6	99003200	99016665	-	exon-exon	0
Zc3h4	7	16420158	16420380	7	16420158	16421507	+	exon-exon	0
Zc3h4	7	16421356	16421507	7	16420158	16421507	+	exon-exon	0
Ppp2r5a	1	191362342	191368640	1	191368641	191372666	-	exon-exon	2	Positive distance means circle has higher coordinates than splicing event
Sec63	10	42761889	42783441	10	42783442	42791291	+	exon-exon	2
Gnptab	10	88379536	88400651	10	88400652	88414598	+	exon-exon	2
Poc1b	10	99113248	99124830	10	99124831	99129662	+	exon-exon	2
P2rx4	5	122711464	122714398	5	122714399	122719226	+	exon-exon	2
Galnt7	8	57552611	57583766	8	57583767	57584227	-	exon-exon	2
Gsr	8	33653780	33669001	8	33669153	33682679	+	exon-exon	153
Xrn2	2	147013197	147024507	2	147024715	147026439	+	exon-exon	209
Son	16	91660581	91662100	16	91664198	91664822	+	exon-exon	2099
Nostrin	2	69152419	69156112	2	69158769	69166007	+	exon-exon	2658
P2rx4	5	122707788	122711463	5	122714399	122719226	+	exon-exon	2937
Zc3h4	7	16401307	16416772	7	16420158	16421507	+	exon-exon	3387
Rnf214	9	45863691	45864289	9	45869179	45869544	-	exon-exon	4891
Thrb	14	17982202	18002527	14	18008569	18011270	+	exon-exon	6043
Nostrin	2	69144856	69152334	2	69158769	69166007	+	exon-exon	6436
Nrip1	16	76295016	76323596	16	76330746	76352546	-	exon-exon	7151
Nrip1	16	76295016	76323596	16	76330746	76352549	-	exon-exon	7151
Kif2a	13	106974563	106975370	13	106982524	106988075	-	exon-exon	7155
Eps15l1	8	72346172	72358312	8	72367904	72380306	-	exon-exon	9593
Ubr4	4	139378731	139380658	4	139390840	139393419	+	exon-exon	10183
Rnf216	5	143068396	143068845	5	143080224	143087621	-	exon-exon	11380
Eef2k	7	120876493	120879813	7	120891596	120892053	+	exon-exon	11784
Rnf216	5	143050044	143067164	5	143080224	143087621	-	exon-exon	13061
Kif2a	13	106965120	106968637	13	106982524	106988075	-	exon-exon	13888
Ikzf1	11	11685003	11685174	11	11699334	11707904	+	intron-exon	14161
Rexo5	7	119805287	119818382	7	119832671	119834401	+	exon-exon	14290
St3gal6	16	58468125	58469752	16	58484763	58493861	-	exon-exon	15012
Dgkd	1	87853457	87865072	1	87880368	87881939	+	exon-exon	15297
Spata13	14	60636647	60690853	14	60706714	60709569	+	exon-exon	15862
Stk4	2	164074248	164079512	2	164096739	164100596	+	exon-exon	17228
Mtss1	15	58947521	58951469	15	58968839	58972560	-	exon-exon	17371
Zcchc11	4	108460017	108460200	4	108478873	108479741	+	exon-exon	18674
Zcchc11	4	108460017	108460200	4	108478873	108486617	+	exon-exon	18674
Zcchc11	4	108460017	108460200	4	108478873	108491464	+	exon-exon	18674
Shank2	7	144192531	144259064	7	144285055	144286766	+	exon-exon	25992
Asb3	11	30998522	31028692	11	31055458	31061586	+	exon-exon	26767
Zcchc7	4	44763291	44865306	4	44893533	44895989	+	exon-exon	28228
Lrig1	6	94625074	94626368	6	94654847	94663998	-	exon-exon	28480
Tom1l2	11	60239177	60240569	11	60270318	60275002	-	exon-exon	29750
Galnt7	8	57545800	57552443	8	57583767	57584227	-	exon-exon	31325
Eef2k	7	120851370	120858343	7	120891596	120892053	+	exon-exon	33254
Kif4	X	100625737	100626588	X	100664736	100669970	+	exon-exon	38149
Arid1a	4	133679008	133679940	4	133719537	133723051	-	exon-exon	39598
Stk3	15	34959077	34999830	15	35039664	35039741	-	intron-intron	39835
Pkn2	3	142794496	142798902	3	142839208	142853714	-	exon-exon	40307
Susd1	4	59331957	59332936	4	59379599	59428064	-	exon-exon	46664
Foxn3	12	99296621	99341421	12	99388361	99388917	-	exon-exon	46941
Vrk2	11	26483325	26486959	11	26534211	26550075	-	exon-exon	47253
Ctnna1	18	35154541	35174252	18	35222065	35223575	+	exon-exon	47814
Nfix	8	84723728	84723850	8	84771784	84772315	-	exon-exon	47935
Nfix	8	84723728	84723850	8	84771784	84779275	-	exon-intron	47935
Galnt7	8	57526252	57531601	8	57583767	57584227	-	exon-exon	52167
Sh3kbp1	X	159708744	159764011	X	159816577	159828579	+	exon-exon	52567
Hecw2	1	53841172	53851572	1	53904249	53914632	-	exon-exon	52678
Galnt7	8	57523828	57524699	8	57583767	57584227	-	exon-exon	59069
Pi4ka	16	17282823	17282927	16	17348715	17356216	-	exon-exon	65789
Bach2	4	32239133	32247763	4	32317198	32317304	+	exon-exon	69436
Bach2	4	32239133	32247763	4	32317198	32417583	+	exon-exon	69436
Egfr	11	16752571	16793639	11	16881464	16883613	+	exon-exon	87826
Foxn3	12	99291302	99292607	12	99388361	99388917	-	exon-exon	95755
Foxn3	12	99219664	99291236	12	99388361	99388917	-	exon-exon	97126
Prkcb	7	122290545	122416067	7	122516829	122518179	+	exon-exon	100763
Prkcb	7	122290545	122416067	7	122516829	122528572	+	exon-exon	100763
Rabgap1l	1	160238636	160247458	1	160627215	160645401	-	exon-exon	379758
Pde4d	13	109117081	109260653	13	109693025	109698156	+	intron-intron	432373

## Sheet: Liver
	DexSeq Coordinates			CircRNA Coordinates
Gene	Chr	Start	Stop	Chr	Start	Stop	Strand	Type	Genomic Distance of Circle to Splice Events	Notes
Arhgap26	18	39363209	39366864	18	39227368	39246924	+	exon-exon	-116286	Negative distance means circle has smaller coordinates than splicing event
Arhgap26	18	39360931	39362582	18	39227368	39246924	+	exon-exon	-114008
Arhgap26	18	39357829	39360754	18	39227368	39246924	+	exon-exon	-110906
Arhgap26	18	39357799	39357828	18	39227368	39246924	+	exon-exon	-110876
Arhgap26	18	39357553	39357663	18	39227368	39246924	+	exon-exon	-110630
Cit	5	115961198	115967887	5	115884866	115886807	+	exon-exon	-74392
Arhgap35	7	16565330	16614471	7	16511193	16512485	-	exon-exon	-52846
Ckap5	2	91612816	91614972	2	91559049	91563113	+	exon-exon	-49704
Ckap5	2	91612816	91614972	2	91562754	91563113	+	exon-exon	-49704
Usp6nl	2	6443495	6446390	2	6391055	6394555	+	exon-exon	-48941
Elf1	14	79580185	79582475	14	79536123	79536422	+	exon-exon	-43764
Ckap5	2	91601127	91606245	2	91559049	91563113	+	exon-exon	-38015
Ckap5	2	91601127	91606245	2	91562754	91563113	+	exon-exon	-38015
Ckap5	2	91591792	91594682	2	91559049	91563113	+	exon-exon	-28680
Ckap5	2	91591792	91594682	2	91562754	91563113	+	exon-exon	-28680
Ckap5	2	91588758	91591665	2	91559049	91563113	+	exon-exon	-25646
Ckap5	2	91588758	91591665	2	91562754	91563113	+	exon-exon	-25646
Cps1	1	67205200	67206755	1	67184381	67184528	+	intron-intron	-20673
Ckap5	2	91581239	91585721	2	91559049	91563113	+	exon-exon	-18127
Ckap5	2	91581239	91585721	2	91562754	91563113	+	exon-exon	-18127
Ckap5	2	91579537	91581109	2	91559049	91563113	+	exon-exon	-16425
Ckap5	2	91579537	91581109	2	91562754	91563113	+	exon-exon	-16425
Egfr	11	16893107	16896893	11	16881464	16883613	+	exon-exon	-9495
Larp1	11	58051002	58051207	11	58040391	58044050	+	exon-exon	-6953
Esco1	18	10588551	10593745	18	10574875	10586041	-	exon-exon	-2511
Esco1	18	10588551	10593745	18	10582055	10586041	-	exon-exon	-2511
Fanci	7	79440748	79443740	7	79433183	79438400	+	exon-exon	-2349
Slc16a10	10	40080808	40141702	10	40076564	40080807	-	exon-exon	-2
Vps13b	15	35794490	35834183	15	35792039	35794489	+	exon-exon	-2
Rnf214	9	45869545	45871545	9	45869179	45869544	-	exon-exon	-2
Ube2i	17	25266567	25268407	17	25264766	25269479	-	exon-exon	0	Zero distance means circle overlaps with the splicing event
Dhtkd1	2	5925268	5929637	2	5923869	5932542	-	exon-exon	0
Ubp1	9	113956707	113956813	9	113944848	113958939	+	exon-exon	0
Adk	14	21318184	21369070	14	21369071	21423589	+	exon-exon	2	Positive distance means circle has higher coordinates than splicing event
Dpyd	3	118870478	118897093	3	118897094	118944335	+	exon-exon	2
Tbk1	10	121547189	121551250	10	121552200	121553068	-	exon-exon	951
Mat1a	14	41111157	41114216	14	41121473	41121779	+	intron-intron	7258
Cps1	1	67174502	67176908	1	67184381	67184528	+	intron-intron	7474
Kansl1l	1	66738214	66762047	1	66772906	66778108	-	exon-exon	10860
Senp5	16	31962506	31963517	16	31983264	31983873	-	exon-exon	19748
Wac	18	7869530	7869577	18	7901496	7906044	+	exon-exon	31920
Akt3	1	177050253	177059333	1	177102962	177109738	-	exon-exon	43630
Kansl1l	1	66719363	66721006	1	66772906	66778108	-	exon-exon	51901
Atp9b	18	80795433	80808611	18	80869742	80917878	-	exon-exon	61132
Taok3	5	117120340	117126300	5	117215349	117217240	+	exon-exon	89050
Slc25a21	12	56775393	56858026	12	57154494	57155979	-	intron-intron	296469
Arhgap26	18	38714514	38775497	18	39097630	39111900	+	exon-exon	322134
