# Supplementary material for: ADAR-deficiency perturbs the global splicing landscape in mouse tissues
Source: Genome Res. 2020 Aug;30(8):1107–18. doi: 10.1101/gr.256933.119 (PMC7462079; doi:10.1101/gr.256933.119)
Supplement: Supplemental Material [file supp_gr.256933.119_Supplemental_Table_S7.xlsx]

## Sheet: Legend
Supplemental_Table_S7: Sequences of oligonucleotides used in the present study.
All oligonucleotides used throughout the study are listed. If not otherwise stated the oligonucleotides were ordered from Microsynth (https://www.microsynth.at).
The oligonucleotides are sorted into different worksheets according to the individual usage:
Endpoint-PCR-MAJIQ: used to validate the results acquired via MAJIQ using regular endpoint PCR
qPCR-MAJIQ: validation of results obtained by MAJIQ using RT-qPCR
qPCR-DEXSeq: validation of results obtained by DEXseq using RT-qPCR
qPCR-Cooccurrence: validation of results obtained by Co-occurrence analysis using RT-qPCR
Max-Ent-Validation: sequences of oligonucleotides used to construct the plasmids required to validate the MaxEnt results. Gene fragments were ordered from Twist (https://www.twistbioscience.com/).

## Sheet: Endpoint-PCR-MAJIQ
Gene	Program	Purpose	Primer	Sequences
Fancg	MAJIQ	RT-PCR	Fwd	GGAGCTAATCACAGGGAGCC
			Rev	TCAACCAGCAGTTCCAGACTC
Hdac10	MAJIQ	RT-PCR	Fwd	GCACTTGTGTACCACGAGGA
			Rev	CACCAAGCCCAACTCTTCCT
Hsf1	MAJIQ	RT-PCR	Fwd	TGGATACCCCTTTGTCCCCA
			Rev	CAGGTTGGAGTCCATGGCAT
Ip6k2	MAJIQ	RT-PCR	Fwd	TGTCTTGATATTTGTTAGGTGTGCA
			Rev	TGCTATTAAACACAAGTTCCTGTCT
Irf3	MAJIQ	RT-PCR	Fwd	CAGAAGCCAGTGGTGCCTAC
			Rev	GAGTGAGGCAGGCTGCTTTT
Lrch1	MAJIQ	RT-PCR	Fwd	ACGAGAGAACTCCCCTTCAGT
			Rev	AACAGCCGGTGAGGGGAC
Map4k2	MAJIQ	RT-PCR	Fwd	CGGACTTTGGGGTGTCAGG
			Rev	CATGGGGTGCAGGTGGAAC
Npas4	MAJIQ	RT-PCR	Fwd	ATGTTCCAGAGCCGGCATG
			Rev	GGCTTGAAGTCTCACCACCA
Rgs11	MAJIQ	RT-PCR	Fwd	ATCGAGTGCTTCAGGAAGGC
			Rev	GCGCATTCATGGCCCAGTAG
Tars2	MAJIQ	RT-PCR	Fwd	GTCCGCAGCGCAGAGTTG
			Rev	CATACACTGTTGCCGTTGGG
Wnk4	MAJIQ	RT-PCR	Fwd	CCTCTACCACAGCAGCCC
			Rev	AGGTGCCAGTCTAGCATCAC
Zbtb17	MAJIQ	RT-PCR	Fwd	GGGAAGCAGTTCACCACCTC
			Rev	CGTGTGGATCCGGACGTG

## Sheet: qPCR-MAJIQ
Gene	Program	Purpose	Amplicon	Primer	Sequences
Dgat	MAJIQ	qPCR	mRNA	Fwd	TCTCTACAGGGAAGAAGGTCAGT
				Rev	AGAGATCTCGGTAGGTCAGGT
			pre-mRNA	Fwd	TCTCTACAGGGAAGAAGGTCAGT
				Rev	GAGTCCCAACCTGACAACTCC
Dpp7	MAJIQ	qPCR	mRNA	Fwd	CTACAACTCCTCTGGCACGG
				Rev	TACAGGCCTGGTAGTCCCAA
			pre-mRNA	Fwd	CTACAACTCCTCTGGCACGG
				Rev	AGCTCCTCTCTGTCCACAAAC
Fam196a	MAJIQ	qPCR	mRNA	Fwd	CCATCGGGAAGGGCTTTCAT
				Rev	AAAATCCAGCTCCACACTATAGA
			mRNA	Fwd	CCATCGGGAAGGTGTGGAG
				Rev	TGACCTGAGTTTCCTCGACAG
Fancg	MAJIQ	qPCR	mRNA	Fwd	TCCAGGAGCTAATCACAGGGA
				Rev	GGATTTCCCATCTTACGGAGACA
			pre-mRNA	Fwd	TCCAGGAGCTAATCACAGGGA
				Rev	TTTCCCCCAATTCTTAGGGCT
Hdac10	MAJIQ	qPCR	mRNA	Fwd	GATGACCCCGAGTGCGAAAT
				Rev	CTGATGCCTCACAAGCTGAC
			pre-mRNA	Fwd	AACACTGAGATCCTTGTCTGCT
				Rev	CTGATGCCTCACAAGCTGAC
Hdac5	MAJIQ	qPCR	mRNA	Fwd	CGGGAGGCTCAGACAGGT
				Rev	ACAGAGAGAGCACTGGGGC
			pre-mRNA	Fwd	CGGGAGGCTCAGACAGGT
				Rev	AGGGATGGGACGTGAGCT
Irak1	MAJIQ	qPCR	mRNA	Fwd	TCCCCAGCTTTTCCAGGCTC
				Rev	AAATTCCCTGGGGGTTAAGAGAC
			pre-mRNA	Fwd	CTGCCATCTTTATGAAGCTTTTCCA
				Rev	AAATTCCCTGGGGGTTAAGAGAC
Kank3	MAJIQ	qPCR	mRNA	Fwd	GAGAGAAGGGAGGTGTGAACTG
				Rev	GCCATCTCTGCTGGTGACTC
			pre-mRNA	Fwd	CCTCCTTGGCAGGTGTGAAC
				Rev	GCCATCTCTGCTGGTGACTC
Map4k2	MAJIQ	qPCR	mRNA	Fwd	TGGATGGCACCAGAGGTTG
				Rev	GGTGCAGGTGGAACAGTGG
			pre-mRNA	Fwd	TCTCGTATGTGACCCTGATTCT
				Rev	GGTGCAGGTGGAACAGTGG
Mxra8	MAJIQ	qPCR	mRNA	Fwd	AGTCAAAGGGGAAGGATGTGA
				Rev	AGCTGGATGTCCTCAGTCCT
			pre-mRNA	Fwd	GCCTCCTAAACTGCTATCTCCC
				Rev	AGCTGGATGTCCTCAGTCCT
Naa40	MAJIQ	qPCR	mRNA	Fwd	GCAGACGATGTATGAGCAAAGT
				Rev	TCATAGCAGTACAGGACTTCATC
			mRNA	Fwd	TGAATGTCTCCATTGAATGTAAGCG
				Rev	TCATAGATCGTCTGCATATTGGT
Npas4	MAJIQ	qPCR	mRNA	Fwd	GTTTCTGAAAGTGTCCTAATCTACCTG
				Rev	GCCAACAGGCGGTAGTGTT
			mRNA	Fwd	TGAAAGTGGCTGAAAGTGGAGA
				Rev	GGCAGTAAAAGGGCCTTCTG
Gene	Program	Purpose	Amplicon	Primer	Sequences
Oaz1	MAJIQ	qPCR	mRNA	Fwd	AGGACAGAGCTTTCTTGGCT
				Rev	TAGTCCTCCTCACCCGGGTC
			pre-mRNA	Fwd	CCCACAGCCGCCCTACTC
				Rev	TAGTCCTCCTCACCCGGGTC
Prpf39	MAJIQ	qPCR	mRNA	Fwd	ACTTAGAATTCGAAATTGAAAATGGGA
				Rev	GACCATCTCCTTAATCCAAAACTCC
			pre-mRNA	Fwd	ACTTAGAATTCGAAATTGAAAATGGGA
				Rev	AAACACACTCTATCATTTTCTTACCTT
Rasip1	MAJIQ	qPCR	mRNA	Fwd	GCCAGAGAACCACCCAGAG
				Rev	CACTTTCTCCTGTACAAAGCTCA
			pre-mRNA	Fwd	TCCCTTAGCCACCCAGAGG
				Rev	CACTTTCTCCTGTACAAAGCTCA
Rgs11	MAJIQ	qPCR	mRNA	Fwd	GGCGTACCTGAAGTTCAGCA
				Rev	GCATTCATGGCCCAGTAGGT
			pre-mRNA	Fwd	CACCGCCCTCTGGATCCC
				Rev	GCATTCATGGCCCAGTAGGT
Rnaseh2a	MAJIQ	qPCR	mRNA	Fwd	CCAAAGCCTGGCTGAGGAAA
				Rev	CCTCCCAAATGACATCTTCTGC
			pre-mRNA	Fwd	CCAAAGCCTGGCTGAGGAAA
				Rev	GTTCCCTCAGCCACTCTCAG
Rpl22	MAJIQ	qPCR	mRNA	Fwd	TGGGGTGTCTGGAGGGGTT
				Rev	AAGCTTTTTCAATACAAGCCCA
			pre-mRNA	Fwd	TGGGGTGTCTGGAGGGGTT
				Rev	TCATGTCAGAGTCATGAAAGTCCT
Slx1b	MAJIQ	qPCR	mRNA	Fwd	GATGAAGAGGGCCCCTTGTG
				Rev	GATTTCTTGCAGCTAGGACAATGT
			pre-mRNA	Fwd	GATGAAGAGGGCCCCTTGTG
				Rev	TGGGAAGAGGACTAGGACTCA
Srsf6	MAJIQ	qPCR	mRNA	Fwd	GCCATTAGACGCAGGGTGAT
				Rev	CCTCCACCACATCACAGTGT
			pre-mRNA	Fwd	GCCATTAGACGCAGGGTGAT
				Rev	TACACTAAGTACTTACATCACAGTGTG
Tars2	MAJIQ	qPCR	mRNA	Fwd	GCAGAGTTGCCCATTTTAGAGC
				Rev	AAGTGGTTGTCCAAGTTCCTCT
			pre-mRNA	Fwd	GCAGAGTTGCCCATTTTAGAGC
				Rev	GCATCACCCTTTCCTTCAAGC
Tmem44	MAJIQ	qPCR	mRNA	Fwd	CCCCCGCTCTTGAACTGG
				Rev	TGATAACAGCACAGCGTGT
			pre-mRNA	Fwd	CCCCCGCTCTTGAACTGG
				Rev	GGTCCCGTCCCCATTACAG
Wnk4	MAJIQ	qPCR	mRNA	Fwd	GTCCCTGCTGTCCCCATC
				Rev	CGGGAAGCCTCATTCTCTGT
			pre-mRNA	Fwd	GTCCCTGCTGTCCCCATC
				Rev	TCCTAGCCCTCTTCATACCCC

## Sheet: qPCR-DEXSeq
Gene	Program	Purpose	Amplicon	Primer	Sequences
Acot7	DEXSeq	qPCR	mRNA	Fwd	CGGAAAGGCTGTGTCATCAC
				Rev	CCGGTAGCGCTTTTGTGAGT
			pre-mRNA	Fwd	TATCCTCTGCAGGCTGTGTC
				Rev	CCGGTAGCGCTTTTGTGAGT
Adarb1	DEXSeq	qPCR	mRNA	Fwd	TGCCAAGGTGATAAGTGTTTCG
				Rev	TCTTTGTTATTTAAATAAAGCTCGAGC
			pre-mRNA	Fwd	TGCCAAGGTGATAAGTGTTTCG
				Rev	AAAACAGCTCCCTTCGCATG
Adat2	DEXSeq	qPCR	mRNA	Fwd	GCCTTATGAAAATCCCGCTGG
				Rev	TGAAACGGTCTTCCAGTATTGGG
			mRNA	Fwd	GACCTTAATTCTGTACTATAAATCCCG
				Rev	TGAAACGGTCTTCCAGTATTGGG
Ankrd35	DEXSeq	qPCR	mRNA	Fwd	GGAAGCCAAGATCAAGGAGTTG
				Rev	CTGCAGCTGTAGGGCGAG
			pre-mRNA	Fwd	TCCGTTTGGCCTTAGATCAAG
				Rev	CTGCAGCTGTAGGGCGAG
Atp5b	DEXSeq	qPCR	mRNA	Fwd	ACCAAACAATTTGCTCCTATTCATG
				Rev	CGATTTTCCCACCCTTGGC
			pre-mRNA	Fwd	CCTCCCTGAACCTTACAGATTTG
				Rev	CGATTTTCCCACCCTTGGC
Aup1	DEXSeq	qPCR	mRNA	Fwd	GTCTTCTTTTCCTTCTCCTCCCA
				Rev	CCTGGCCAGGTCTCTCTG
			pre-mRNA	Fwd	GTCTTCTTTTCCTTCTCCTCCCA
				Rev	ACCCTTTCCCATACCCAGGT
Camk2g	DEXSeq	qPCR	mRNA	Fwd	AAGATTTGTGACCCGGGCC
				Rev	TGTTCTTGGACAGGAGATTCTCA
			pre-mRNA	Fwd	AAGATTTGTGACCCGGGCC
				Rev	CACGAACCCACTCACGATTC
Car11	DEXSeq	qPCR	mRNA	Fwd	ACTTCGTGCCAGGGCCTC
				Rev	CTTCTCTCCCCCGGTGCT
			pre-mRNA	Fwd	TGTTCCCATAGGGCCTCCC
				Rev	CTTCTCTCCCCCGGTGCT
Casc3	DEXSeq	qPCR	mRNA	Fwd	AAGACTGGGAACTGGGAGGC
				Rev	GTGGTTAGGCACACCTCGAA
			pre-mRNA	Fwd	AAGACTGGGAACTGGGAGGC
				Rev	TCTAGTCCCTCGCCCTGAAT
Ccdc174	DEXSeq	qPCR	mRNA	Fwd	TCTAGATGAGGAAGTGGAGGACA
				Rev	CATTCCTCACTGGGGTCTTGA
			pre-mRNA	Fwd	CGAGAATCTGTAAATTGATTTTTGTGC
				Rev	CATTCCTCACTGGGGTCTTGA
Dicer1	DEXSeq	qPCR	mRNA	Fwd	CCTCAGATTCCTCACTTTCCTGT
				Rev	CGGAGTCATTAACAACATTAAGAGGT
			pre-mRNA	Fwd	TTCTTTTTGCTAAGATTCCTCACTT
				Rev	CCCTTCTTACCAACATTAAGAGGT
Dusp11	DEXSeq	qPCR	mRNA	Fwd	AATTGTTCAACAGCTGCCGG
				Rev	TGACATGACGTTTCTGCAGGT
			mRNA	Fwd	ATCTGCTCCTCAGTGTTCAACA
				Rev	TGACATGACGTTTCTGCAGGT
Gene	Program	Purpose	Amplicon	Primer	Sequences
Egfr	DEXSeq	qPCR	mRNA	Fwd	ATCCTTGACGAAGCCTATGTGA
				Rev	CGTAGTCCAGGAGGCAACC
			pre-mRNA	Fwd	TATTGTCCTTACCTTGTAGGAAGCC
				Rev	CGTAGTCCAGGAGGCAACC
Eloc	DEXSeq	qPCR	mRNA	Fwd	GTCGTCGTCATGATGGAGAGG
				Rev	TGTTCCTGATGTTAGTGCATGT
			pre-mRNA	Fwd	TGCTAAGCATGGACCATGACT
				Rev	TGTTCCTGATGTTAGTGCATGT
Ezh1	DEXSeq	qPCR	mRNA	Fwd	ACAATTCTACACAAGTGTATAACTACC
				Rev	TTTGGTCAGTCTGGGCTGC
			pre-mRNA	Fwd	ACAATTCTACACAAGTGTATAACTACC
				Rev	GGGTGCTCTTACAGTCTGGG
Fabp5	DEXSeq	qPCR	mRNA	Fwd	GAGCTAGGAGTAGGACTGGC
				Rev	CACAGTCGTCTTCACTGTGC
			pre-mRNA	Fwd	CCCACAGGAGTAGGACTGGC
				Rev	CACAGTCGTCTTCACTGTGC
Fez1	DEXSeq	qPCR	mRNA	Fwd	TGGTTGGTTTGGGATGCTCT
				Rev	TGTCAGAGCTGTTGCCATTCA
			pre-mRNA	Fwd	TACAGGGTTTGGGATGCTCTG
				Rev	TGTCAGAGCTGTTGCCATTCA
Fgd1	DEXSeq	qPCR	mRNA	Fwd	CCTGTGGCAACCTGACCTT
				Rev	CTCCAAAGACTTCTGGGCATC
			pre-mRNA	Fwd	CCTGTGGCAACCTGACCTT
				Rev	CACACACTCACTCTGGGCAT
Gnb5	DEXSeq	qPCR	mRNA	Fwd	TTCGTGTCTGGGGGTTGTG
				Rev	CGAACACTGTTGACATCCGA
			pre-mRNA	Fwd	GTATAACTGCATGATTTCCTGTTTGT
				Rev	CGAACACTGTTGACATCCGA
Ift52	DEXSeq	qPCR	mRNA	Fwd	CAGCCACCCTCTCAGAGCAG
				Rev	TTCCTCGTGAGCCTTGATGAC
			pre-mRNA	Fwd	CAGCCACCCTCTCAGAGCAG
				Rev	CCTGAGTACTAACTTGATGACCT
Mtmr14	DEXSeq	qPCR	mRNA	Fwd	CACATTTATGCATCAGTGGACCA
				Rev	CCTGGAAGCTGAAAGGGAGA
			pre-mRNA	Fwd	TCTCTCTGCCCCAGATCAGT
				Rev	CCTGGAAGCTGAAAGGGAGA
Oxa11	DEXSeq	qPCR	mRNA	Fwd	TCACTCAGGCCCCCGTCTT
				Rev	ATCAGACACGGTGAGATCTTGG
			pre-mRNA	Fwd	GTGTACTGACTGCTTATCCTGTG
				Rev	ATCAGACACGGTGAGATCTTGG
Pin1	DEXSeq	qPCR	mRNA	Fwd	CAGCTCAGGCCGGGTGTA
				Rev	GCCATTCTTGCTGCTGCC
			pre-mRNA	Fwd	TGCTGAAGTAGGTGCTGCTC
				Rev	GCCATTCTTGCTGCTGCC
Pradc1	DEXSeq	qPCR	mRNA	Fwd	GGCTGCTCCTTCCTCTCTAAG
				Rev	GCGGATCATGTAGCCATCTC
			pre-mRNA	Fwd	GGCTGCTCCTTCCTCTCTAAG
				Rev	AAAGAGCCCTCACCCATCTC
Gene	Program	Purpose	Amplicon	Primer	Sequences
Prpf19	DEXSeq	qPCR	mRNA	Fwd	ATGAGTGGGGTTGGCCGAAT
				Rev	GTTGTCTGCAGTTGCTGGC
			pre-mRNA	Fwd	GTGTAGAATAGGAGGTGGTGTCC
				Rev	GTTGTCTGCAGTTGCTGGC
Prpf40b	DEXSeq	qPCR	mRNA	Fwd	CAGACTGAATGCCAGCACCT
				Rev	TCAGAGCCCTGCCGACTC
			pre-mRNA	Fwd	CAGACTGAATGCCAGCACCT
				Rev	CCCTCTACCTGCCGACTCA
Rbm5	DEXSeq	qPCR	mRNA	Fwd	CAAAATATGGACATCTACCGAAGATCC
				Rev	GTCTCTGTATTTCATCTCTCTCTCCC
			pre-mRNA	Fwd	CAAAATATGGACATCTACCGAAGATCC
				Rev	CCAAACACAGTATCCATGTATTCACC
Srsf10	DEXSeq	qPCR	mRNA	Fwd	TTTTATATTTGAGGATGTTCGTGATGC
				Rev	TCTTCCGATCCCCCTGTGC
			pre-mRNA	Fwd	TTCTCAAGCCCCTTAACATTTAGC
				Rev	TCTTCCGATCCCCCTGTGC
Ttc19	DEXSeq	qPCR	mRNA	Fwd	ACAGGAATTTGCCCTTGCTG
				Rev	GCTGTTTCTTCTGACATAATATCTTCT
			pre-mRNA	Fwd	ACAGGAATTTGCCCTTGCTG
				Rev	AGTTTCCTACCTGACATAATATCTTCT
Usp40	DEXSeq	qPCR	mRNA	Fwd	CCAAGGTGCTCCTGGCCC
				Rev	CTGAGACTTCAGTTCCACCAA
			pre-mRNA	Fwd	TTAAGGTGCTCCTGGCCCC
				Rev	CTGAGACTTCAGTTCCACCAA
Zxdc	DEXSeq	qPCR	mRNA	Fwd	ACTCAGGCCAGCACAGTTG
				Rev	AGGGGTCATCCTGCAGAACA
			pre-mRNA	Fwd	ACTCAGGCCAGCACAGTTG
				Rev	TGGTTCCTACCTGCAGAACAG

## Sheet: qPCR-Cooccurrence
Gene	Program	Purpose	Amplicon	Primer	Sequences
Dgkz	Co-occurrence	qPCR	mRNA	Fwd	CGCGCCCACATTGAGAGA
				Rev	CATCCAGGAAACACCACTTGG
			mRNA	Fwd	TAGCTGTGACCCACCACGA
				Rev	CATCCAGGAAACACCACTTGG
Flna	Co-occurrence	qPCR	mRNA	Fwd	GACTATGAGGTCTCAGTCAAGTTCA
				Rev	TGACTCCTGAAGACTAGAAACAGT
			pre-mRNA	Fwd	GACTATGAGGTCTCAGTCAAGTTCA
				Rev	ATGGGCAGTTTCTCTCAGTGC
Flnb	Co-occurrence	qPCR	mRNA	Fwd	GTAACTACGAGGTGTCTATCAAGT
				Rev	TCCTGATTCCTGAAGGCTCA
			pre-mRNA	Fwd	GTAACTACGAGGTGTCTATCAAGT
				Rev	GATGGATGCTTCCTTGTGCC
Mcts1	Co-occurrence	qPCR	mRNA	Fwd	TGGTGGTTTGGACTTGAGAACA
				Rev	TGCCTGAAAACAAGCTGGAA
			pre-mRNA	Fwd	TGGTGGTTTGGACTTGAGAACA
				Rev	AAATATGCATGCATGTGTGTTTAAGTG
Mfn1	Co-occurrence	qPCR	mRNA	Fwd	AAAATTTTGAACAAACTTTTGAGGAGT
				Rev	TCCATTGAATAAACCCTCTTCTCTG
			pre-mRNA	Fwd	AAAATTTTGAACAAACTTTTGAGGAGT
				Rev	GGGTGCCTACCTCTTCTCTG
Neil1	Co-occurrence	qPCR	mRNA	Fwd	GAAGTGGTTCAGCTGGGGG
				Rev	GAGCTCATGCCTGGCACA
			pre-mRNA	Fwd	CACGACCCTCTCACCTCTGA
				Rev	GAGCTCATGCCTGGCACA
Ppp1r7	Co-occurrence	qPCR	mRNA	Fwd	AACAAACTCACCATGTTGGATATTG
				Rev	GATTGTCATTCATCCAGAATTCTTGC
			pre-mRNA	Fwd	AACAAACTCACCATGTTGGATATTG
				Rev	AGCCTAAGAGATGGATACCAATC
Selt	Co-occurrence	qPCR	mRNA	Fwd	ATCGATCATAGCCCTACCTATCA
				Rev	TGTCTTCAGTACAGGCCTTCA
			mRNA	Fwd	CAAGGGTTTGTATAAGAGTGACTACTG
				Rev	TGTCTTCAGTACAGGCCTTCA
Sypl	Co-occurrence	qPCR	mRNA	Fwd	CACAGTTCTACGTTACGTTTGCA
				Rev	AACAATAAAGTCGATCATGGGCA
			pre-mRNA	Fwd	CACAGTTCTACGTTACGTTTGCA
				Rev	ACTTTTGAACCGAGACATAAAACG
Trappc2l	Co-occurrence	qPCR	mRNA	Fwd	ATTCCAAGGTGAAATTTGTCATGGT
				Rev	TTTCTGAGTTCGAGGCCAGC
			pre-mRNA	Fwd	GCCCCATGAGTGCGTTCATC
				Rev	TTTCTGAGTTCGAGGCCAGC

## Sheet: MaxEnt-Validation
Gene	Editing site (mm10)	Twist Gene Fragment Sequence
Ap1m1	chr8:72251873	TTTAAATCTAGACTCGAGGATATCGAATTCGTCAGTGCCAATGGCAACGTGCTGCGCAGTGAGATTGTGGGTTCCATCAAGATGCGGGTCTTCCTCTCAGGCATGCCTGAGTTACGCCTGGGTCTCAATGACAAGGTCCTCTTCGACAACACAGGCCGTGAGTACCTGAAGACAGTGCAGAGGCTGGATCTGTCTTGTTCTCGGGAGGTGACTTCACTTGACCCTGAGTCAGAGCTGAGTGCATGCTTACCTGGTGGGACAGCCAGCTGCGGATCCCGCAGTAGTCCAGGGTTTCCTTGA
Reln	chr5:21895985	TTTAAATCTAGACTCGAGGATATCGAATTCGGAAGCTCGGATGAAAGGAGTTCTACTGCGCTGGTGGCAGCCACGCCACAATGGAACAGGTCATGATCAATGGGCTTTGGACCATGTGGAGGTCGTCCTGTGAGTATCTGCTACTTAGCGTCCTGCGTCCCTTTTAGCAAGGTTTGAAGTTCCTTTTACCTGGCATGCTCCTTAATTCAGTAAGAAATAGACATGATGAGAAGGTCCCCACAGGGCCACTGTGGCTAACAGTCTTTCAGCGGATCCCGCAGTAGTCCAGGGTTTCCTTGA
Syp1	chr12:32967747	TTTAAATCTAGACTCGAGGATATCGAATTCGGAAAAGCATGTTCTCATAGGTGATTACTCCTCTTCTGCACAGTTCTACGTTACGTTTGCAGTCTTTGTGTTCCTGTACTGCATTGCTGCCCTTCTGCTCTATGTTGGTTACACGAACCTCTACCGGGATAGTCGCAAACTGCCCATGATCGTAAGTAACCGTTTTATGTCTCGGTTCAAAAGTAGTATGCACACATATAAGTAAGCTACAGTTCAAGGTACCTGCTGATGCTTCCCTACGGATCCCGCAGTAGTCCAGGGTTTCCTTGA
Nrd1	chr4:109017700	TTTAAATCTAGACTCGAGGATATCGAATTCCCGGGAGGCCGGCCTCTGCCTTGTTTCTGTTTCTGCTTTCTCCCTCAGGTCTGCACCTGTTGAGCATTTGGCAGGATGGCAAGTGGAGGAGCAGCAGGGTGAAACTGACACAGTGCTGGTGAGTTTCACTTTGCTGCTCCTCCTGACTCCCAGGGAGAGTTCTGTTCTTTCTGTTGGCAAGCTTCTCCAAGTGAATCCTTGAGGTGCTGGTACTGCTTTAGGATTGACGCCACTGTTTGTGGATCCCGCAGTAGTCCAGGGTTTCCTTGA
Kdm5d	chrY:914183	TTTAAATCTAGACTCGAGGATATCGAATTCTGCCGAATATGCTCTCGTGGGGATGAAGTCGATAAGTTTCTGCTCTGTGATGGCTGCAGTGATAATTACCACATCTTTTGCCTATTGCCACCGCTTTCTGAAGTCCCCAAGGGAGTATGGAGATGCCCGAAGTGTATCTTAGCAGTAAGATTTGTCCATCTTAGACAGTTTAATCATAACCTAGTCAATTTCTTTTATCTATCCTTTTGGACTGAAATGGACTAAAGTTAGTAGAGAAGAGGATCCCGCAGTAGTCCAGGGTTTCCTTGA
Primers for RT-PCR	Sequence
fw	GCCACTGTGCTGGATATCTG
rev	GAAAGACCGCGAAGAGTTTG
Gene	Fw Primer (site directed mutagenesis)	Rev Primer (site directed mutagenesis)
Ap1m1	ACAGGCCGTGGGTACCTGAAGACAGTGCAGAGGCTG	CTTCAGGTACCCACGGCCTGTGTTGTCGAAGAGGAC
Reln	TCGTCCTGTGGGTATCTGCTACTTAGCGTCCTGCGT	TAGCAGATACCCACAGGACGACCTCCACATGGTCCA
Syp1	CATGATCGTAGGTAACCGTTTTATGTCTCGGTTCAA	AAACGGTTACCTACGATCATGGGCAGTTTGCGACTA
Nrd1	AGTGCTGGTGGGTTTCACTTTGCTGCTCCTCCTGAC	AAAGTGAAACCCACCAGCACTGTGTCAGTTTCACCC
Kdm5d	GTATCTTAGCGGTAAGATTTGTCCATCTTAGACAGT	CAAATCTTACCGCTAAGATACACTTCGGGCATCTCC
